# Supplementary material for: Bioinformatic and experimental survey of 14-3-3-binding sites
Source: PubMed Central journal article supplement — Biochem J. 2010 Mar 15;427(Pt 1):69–78. doi: 10.1042/BJ20091834 (PMC2860806; doi:10.1042/bj20091834), 2010-03-15
Supplement: bj4270069add.pdf [file bj4270069add.pdf]

**Supplementary Table 1 Proteins reported to bind directly to 14-3-3s with relevant interaction sites indicated A. Mammalian proteins; B. Non-mammalian animal proteins; C. Fungal proteins; D. Plant proteins; E. Bacterial and viral proteins that interact with 14-3-3s inside eukaryotic host cells.**

The abstracts of 2969 papers listed with the keyword '14-3-3' in PubMed (11 Jan 2010) were searched for reports of direct interactions between 14-3-3 and a target protein, and where possible relevant sites were identified in the manuscript. Often residue numbers were given with no species or amino acid sequence context, in which case these details were requested from corresponding authors, and/or deduced from the sequences of oligonucleotides used for site-directed mutagenesis of 14-3-3-binding sites. Where the precise form of a mammalian protein that had been studied in a publication was not specified, we assigned a sequence that contained the relevant site, choosing a human sequence where the species studied was unclear. Any sites that still could not be placed in a sequence context were omitted. 14-3-3-binding sites are indicated as lower case letters highlighted in yellow, and where more than two sites are implicated in 14-3-3 binding of a protein, these are highlighted in turquoise and not included in the Weblogo analysis in Supplementary Table 2 and Fig 1 (except for MAPT, see notes). **Caveat emptor:** The data collected may include assignments that are incorrect, due to inaccuracies in the original assignments, or our interpretation of authors' intentions for which we apologise. To aid future improvements in the dataset, we ask authors to report any corrections to [c.mackintosh@dundee.ac.uk](mailto:c.mackintosh@dundee.ac.uk).

| <b>A. Mammalian proteins reported to interact directly with 14-3-3</b>                                                                                                                                                                                                                                                                                                                                                                                                                                                                                                                                                                                                                                                                                                                                                                                                                                                                                                                                                                                                                                                                                                                                                                                                                                                                                                                                                                                                                                                                                                                                                                                                                                                                                                                                                                                                                                                               |  |
|--------------------------------------------------------------------------------------------------------------------------------------------------------------------------------------------------------------------------------------------------------------------------------------------------------------------------------------------------------------------------------------------------------------------------------------------------------------------------------------------------------------------------------------------------------------------------------------------------------------------------------------------------------------------------------------------------------------------------------------------------------------------------------------------------------------------------------------------------------------------------------------------------------------------------------------------------------------------------------------------------------------------------------------------------------------------------------------------------------------------------------------------------------------------------------------------------------------------------------------------------------------------------------------------------------------------------------------------------------------------------------------------------------------------------------------------------------------------------------------------------------------------------------------------------------------------------------------------------------------------------------------------------------------------------------------------------------------------------------------------------------------------------------------------------------------------------------------------------------------------------------------------------------------------------------------|--|
| <p><b>Human AANAT</b> Serotonin N-acetyltransferase; arylalkylamine N-acetyltransferase, melatonin-synthesizing enzyme. (Swissprot = Q16613)</p> <p>1 MSTQSTHPLK PEAPRLPPGI PESPSQRRH <b>L</b>PASEFRCL TPEDAVSAFE IEREAFISVL<br/>         61 GVCPLYLDEI RHFLTLCPEL SLGWFEEGCL VAFIIGSLWD KERLMQESLT LHRSGGHIAH<br/>         121 LHVLAHVRAF RQQGRGPILL WRYLHHLGSSQ PAVRRAALMC EDALVPFYER FSHFVAVGPCA<br/>         181 ITVGSLTfME LHCSLRGHPF LRRN<b>S</b>GC</p> <p>&gt;gi 11387096 sp Q16613.1 SNAT_HUMAN RecName: Full=Serotonin N-acetyltransferase; Short=Serotonin acetylase; AltName: Full=Aralkylamine N-acetyltransferase; Short=AA-NAT</p> <p>MSTQSTHPLKPEAPRLPPGIPESPSQRRHTLPASEFRCLTPEDAVSAFEIEREAFISVLGVCPLYLDEI<br/>         RHFLTLCPELSLGWFEEGCLVAFIIGSLWDKERLMQESLTLHRSGGHIAHLHVLAHVRAFRQQGRGPILL<br/>         WRYLHHLGSSQPAVRRAALMCEDALVPFYERFSHFVAVGPCAITVGSLTfMELHCSLRGHPFLRRNSGC</p> <p><b>Notes</b><br/>         14-3-3 binding to phosphoThr31 and phosphoSer205, phosphorylated by PKA in response to light in pineal gland, activates AANAT and protects it from proteolytic degradation.</p> <p><b>References to 14-3-3-binding to AANAT</b><br/>         Obsil T, Ghirlando R, Klein DC, Ganguly S, Dyda F (2001) Crystal structure of the 14-3-3zeta:serotonin N-acetyltransferase complex. A role for scaffolding in enzyme regulation. Cell 105:257-267<br/>         Pozdeyev N, Taylor C, Haque R, Chaurasia SS, Visser A, Thazyeen A, Du Y, Fu H, Weller J, Klein DC, Iuvone PM. Photoc Regulation of Arylalkylamine N-Acetyltransferase Binding to 14-3-3 Proteins in Retinal Photoreceptor Cells. J Neurosci. 2006 Sep 6;26(36):9153-61.<br/>         Ganguly S, Weller JL, Ho A, Chemineau P, Malpoux B, Klein DC (2005) Melatonin synthesis: 14-3-3-dependent activation and inhibition of arylalkylamine N-acetyltransferase mediated by phosphoserine-205. Proc Natl Acad Sci USA 102:1222-1227</p> |  |
| <p><b>Human Abi1</b> Abelson murine leukemia viral oncogene homolog 1 (Tyrosine kinase) (Swissprot = P00519)</p> <p>1 MLEICLKLVG CKSKKGLSSS SSCYLEEALQ RVPASDFEPQ GLSEAARWNS KENLLAGPSE<br/>         61 NDPNLFVALY DFVASGDNTL SITKGEKLRV LGYNHNGEWC EAQTKNGQGW VPSNYITPVN<br/>         121 SLEKHSWYHG PVSRNAEYL LSSGINGSFL VRESESSPGQ RSISLRYEGR VYHYRINTAS<br/>         181 DGKLYVSSSE RFNTLAEVLH HHSTVADGLI TTLHYPAKPR NKPTVYGVSP NYDKWEMERT<br/>         241 DITMKHKLGG QYGEVYEGV WKYSLTVAV KTLKEDTMEV EEFLLKEAAVM KEIKHPNLVQ<br/>         301 LLGVCTREPP FYIITEFMTY GNLLDYLREC NRQEVNAVVL LYMATQISSA MEYLEKKNFI<br/>         361 HRDLAARNCL VGENHLVKVA DFGLSRLMTG DTYTAHAGAK FPIKWTAPES LAYNKFSIKS<br/>         421 DVWAFGVLLW EIATYGMSPY PGIDLSQVYE LLEKDYRMER PEGCPEKVYE LMRACQWNP<br/>         481 SDRPSFAEIH QAFETMFQES SISDEVEKEL GKQGVVRAVS TLLQAPLPT KTRTSRRAAE<br/>         541 HRDTRDVPPEM PHSKQGQESD PLDHEPAVSP LLPRKERGPP EGGLNEDERL LPKDKKTNLF<br/>         601 SALIKKKKKKT APTPPKRSSS FREMDGQPER RGAGEEEGRD ISNGALAFPT LDTADPAKSP<br/>         661 KPSNGAGVNP GALRESGGSG FRSPHLWKKK STLTSSRLAT GEEEGGGSSS KRFLRSCSAS<br/>         721 CVPFHGAKDTE WRSV<b>L</b>PRDL QSTGRQFDSS TFGGHKSEKP ALPRKRAGEN RSDQVTRGTV<br/>         781 TPPPRLVKKN EEADEVFKD IMESSPGSSP PNLTPKPLRR QVTVPASGL PHKEEAGKGS<br/>         841 ALGTPAAAEPT VPTPTSKAGSG APGGTSGKGA EESRVRHHK SSESPPGRDKG KLSRLKPPAP<br/>         901 PPPAASAGKA GPKPSQSPSQ EAAGEAVLGA KTKATSLVDA VNSDAAKPSQ PGEGLKPPVL<br/>         961 PATPKPQSAK PSQTPISAPV VPSTLPSASS ALAGDQPSST AFILPLISTRV SLRKTROQPE<br/>         1021 RIASGAIITKG VVLDSTEALC LAISRNSEQM ASHAVLEAG KNLYTFCVSY VDSIQQMRNK<br/>         1081 FAFREAINKL ENNLRQLQIC PATAGSGPAA TQDFSKLLSS VKEISDIVQR</p>                                                                                                                                                                                        |  |

|                                                                                                                                                                                                                                                                                                                                                                                                                                                                                                                                                                                                                                                                                                                                                                                                                                                                                                                                                                                                                                                                                                                                                                                                                                                                                                                                                                                                                                                                                                                                                                                                                                                                                                                                                                                                                                                                                                                                                                                                                                                                                                                                                                                                                                                                                                                                                                                                                                                                                                                                                                                                                                                                                                                                                                                                                                                                                                                                                                                                                                                                                                                                                                                                                                                                                                                                                                                                                                                                                                                                                                                                                                                                                                                                                                                                                                                                                                                                                                                                                                                                                                                                                                                                                                                                                                                                                                                                                                                                                                                                                                                                                                                                                                                                                                                                                                                                                                                                                                      |  |
|----------------------------------------------------------------------------------------------------------------------------------------------------------------------------------------------------------------------------------------------------------------------------------------------------------------------------------------------------------------------------------------------------------------------------------------------------------------------------------------------------------------------------------------------------------------------------------------------------------------------------------------------------------------------------------------------------------------------------------------------------------------------------------------------------------------------------------------------------------------------------------------------------------------------------------------------------------------------------------------------------------------------------------------------------------------------------------------------------------------------------------------------------------------------------------------------------------------------------------------------------------------------------------------------------------------------------------------------------------------------------------------------------------------------------------------------------------------------------------------------------------------------------------------------------------------------------------------------------------------------------------------------------------------------------------------------------------------------------------------------------------------------------------------------------------------------------------------------------------------------------------------------------------------------------------------------------------------------------------------------------------------------------------------------------------------------------------------------------------------------------------------------------------------------------------------------------------------------------------------------------------------------------------------------------------------------------------------------------------------------------------------------------------------------------------------------------------------------------------------------------------------------------------------------------------------------------------------------------------------------------------------------------------------------------------------------------------------------------------------------------------------------------------------------------------------------------------------------------------------------------------------------------------------------------------------------------------------------------------------------------------------------------------------------------------------------------------------------------------------------------------------------------------------------------------------------------------------------------------------------------------------------------------------------------------------------------------------------------------------------------------------------------------------------------------------------------------------------------------------------------------------------------------------------------------------------------------------------------------------------------------------------------------------------------------------------------------------------------------------------------------------------------------------------------------------------------------------------------------------------------------------------------------------------------------------------------------------------------------------------------------------------------------------------------------------------------------------------------------------------------------------------------------------------------------------------------------------------------------------------------------------------------------------------------------------------------------------------------------------------------------------------------------------------------------------------------------------------------------------------------------------------------------------------------------------------------------------------------------------------------------------------------------------------------------------------------------------------------------------------------------------------------------------------------------------------------------------------------------------------------------------------------------------------------------------------------------------------|--|
| <p>&gt;gi 85681908 sp P00519.4 ABL1_HUMAN RecName: Full=Proto-oncogene tyrosine-protein kinase ABL1; AltName: Full=Abelson murine leukemia viral oncogene homolog 1; AltName: Full=c-ABL; AltName: Full=p150</p> <p>MLEI<sup>1</sup>CLKLVGCKSKKGLSSSSSCYLEEALQRPVADFEPQGLSEARWNSKENLLAGPSENDPNL<sup>2</sup>VALYDFVAGDNTLSITKGEKLRVLGYNHNGEWCEAQT<sup>3</sup>KNGQGWVPSNYITPVNSLEKHSWYHGVPVSRNAEYL<sup>4</sup>LSSGINGSFLVRESESSPGQRSISLRYEGRVYHYRINTASDGKLYVSSSESRFNTLAE<sup>5</sup>LVHHHSTVADGLITTLHYYPAPKRNKPTVYGVSPNYDKWEMERTDITMKHKLGGQYGEVYEGVWKKYS<sup>6</sup>LTVAVKTLKEDTMEVEEFLKEAAVMKEIKHPNLVQLLVGCTREPPFYIITEFMTYGNLLDYLR<sup>7</sup>ECNRQEVNAV<sup>8</sup>VLLYMATQISSAMEYLEKKNFIHRDLAARNCLVGENHLVKVADFGLSRLMTGDTYTAHAGAKFP<sup>9</sup>IKWTAPE<sup>10</sup>SLAYNKFSIKSDVWAFGVLLWEIATYGMSPYPGIDLSQVYELLEKDYRMERPEGCPEKVYELMRACQWNP<sup>11</sup>SDRPSFAEIHQAFETMFQESSISDEVEKELGKQGVRAVSTLLQAP<sup>12</sup>ELPTKTRTSRRAAEHRD<sup>13</sup>TDVPEMPH<sup>14</sup>SKGQGESDPLDHEPAVSP<sup>15</sup>LLPRKERGPP<sup>16</sup>EGGLNEDERLLPKDKKTNLFSALIKKKKTAPT<sup>17</sup>PKR<sup>18</sup>SSSFREMDGQPERRGAGEEGRDISNGALAF<sup>19</sup>PLDTADPAKSPKPSNGAGVPNGALRESGGSGFRSPHLWKK<sup>20</sup>SSTLTSSRLATGEEEGGGSSSKRFLRSCSASCVPHGAKDTEWRSV<sup>21</sup>TLPRDLQSTGRQFDSSTFGG<sup>22</sup>HKSEK<sup>23</sup>PALPRKRAGENS<sup>24</sup>RSDQVTRGTVTPPPRLVKKNEEADEVFKDIMESSPGSSPNLTPKPLRRQVTVAPASGLPHK<sup>25</sup>EAGKGSALGTPAAAE<sup>26</sup>PVTPTSKAGSGAPGGTSKGPAAEESR<sup>27</sup>VR<sup>28</sup>RHKHSS<sup>29</sup>ES<sup>30</sup>SPGRDKGKLSRLK<sup>31</sup>PAPPPPPAASAGKAGKPSQSPSQEAAAGEAVLGAKTKATSLVD<sup>32</sup>AVNSDAAKPSQ<sup>33</sup>PEG<sup>34</sup>LK<sup>35</sup>PVLPATPK<sup>36</sup>QSAKPSGTPISPAPVPSTLPSASSALAGQPSSTAFIPLISTRVSLR<sup>37</sup>KTRQPP<sup>38</sup>ERIASGAI<sup>39</sup>T<sup>40</sup>KG<sup>41</sup>V<sup>42</sup>LD<sup>43</sup>STEALCLAI<sup>44</sup>SRNSEQMASHSAVLEAGK<sup>45</sup>NYLTF<sup>46</sup>CVSVYDSIQ<sup>47</sup>QMRN<sup>48</sup>KFA<sup>49</sup>FREA<sup>50</sup>INKLENNLRELQ<sup>51</sup>ICPATAGSG<sup>52</sup>PAATQDFSKLLSSVKEISDIVQR</p> <p><b>Notes</b><br/>Regulates cytoskeleton remodeling during cell differentiation, cell division and cell adhesion. Localizes to dynamic actin structures, and phosphorylates CRK and CRKL, DOK1, and other proteins controlling cytoskeleton dynamics. Regulates DNA repair potentially by activating the proapoptotic pathway when the DNA damage is too severe to be repaired. Contains both SH2 and SH3 domains and a nuclear localization signals. Expression of Abl in the cytoplasm results in cell proliferation and survival. In contrast, nuclear Abl is activated and induces apoptosis after genotoxic stress. Phosphorylated cABL binds 14-3-3, which sequesters ABL in the cytoplasm. Upon DNA damage 14-3-3 is phosphorylated by JNK leading to dissociation from Abl and Abl translocation to the nucleus inducing apoptosis. TTK (also known as Mps1) phosphorylates c-Abl at Thr735 and that this phosphorylation is of importance to the cytoplasmic sequestration of c-Abl. 14-3-3 also binds to Abl in the context of the Bcr-Abl tyrosine kinase fusion of Philadelphia chromosome (Ph1)-positive human leukemias.</p> <p><b>References to 14-3-3 binding to Abl1</b><br/>Mancini M, Corradi V, Petta S, Martinelli G, Barbieri E, Santucci MA. mTOR inhibitor RAD001 (Everolimus) enhances the effects of imatinib in chronic myeloid leukemia by raising the nuclear expression of c-ABL protein. <i>Leuk Res.</i> 2009 Jul 28.<br/>Yoshida K, and Miki Y. Enabling death by the Abl tyrosine kinase: mechanisms for nuclear shuttling of c-Abl in response to DNA damage. <i>Cell Cycle.</i> 2005 Jun;4(6):777-9.<br/>Mancini M, Veljkovic N, Corradi V, Zuffa E, Corrado P, Pagnotta E, Martinelli G, Barbieri E, Santucci MA. 14-3-3 ligand prevents nuclear import of c-ABL protein in chronic myeloid leukemia. <i>Traffic.</i> 2009 Jun;10(6):637-47.<br/>Nihira K, Taira N, Miki Y, Yoshida K. TTK/Mps1 controls nuclear targeting of c-Abl by 14-3-3-coupled phosphorylation in response to oxidative stress. <i>Oncogene.</i> 2008 Dec 11;27(58):7285-95.<br/>Dong S, Kang S, Lonial S, Khoury HJ, Viallet J, Chen J. Targeting 14-3-3 sensitizes native and mutant BCR-ABL to inhibition with U0126, rapamycin and Bcl-2 inhibitor GX15-070. <i>Leukemia.</i> 2008 Mar;22(3):572-7.<br/>Pendergast AM. Stress and death: breaking up the c-Abl/14-3-3 complex in apoptosis. <i>Nat Cell Biol.</i> 2005 Mar;7(3):213-4.<br/>Yoshida K, Yamaguchi T, Natsume T, Kufe D, Miki Y. JNK phosphorylation of 14-3-3 proteins regulates nuclear targeting of c-Abl in the apoptotic response to DNA damage. <i>Nat Cell Biol.</i> 2005 Mar;7(3):278-85.<br/>Reuther GW, Fu H, Cripe LD, Collier RJ, Pendergast AM. Association of the protein kinases c-Bcr and Bcr-Abl with proteins of the 14-3-3 family. <i>Science.</i> 1994 Oct 7;266(5182):129-33.</p> |  |
| <p><b>Human ADAM22</b> Disintegrin and metalloproteinase domain-containing protein 22 (Swissprot = Q9P0K1)</p> <p>1 MQAAVAVSV<sup>2</sup>PFLLLCVLGTCP<sup>3</sup>PARCGQAGD<sup>4</sup>ASLMELEK<sup>5</sup>RK<sup>6</sup>ENRFV<sup>7</sup>ERQSI<sup>8</sup>VPLRLI<sup>9</sup>YRSG<br/>61 GEDES<sup>10</sup>RHDAL<sup>11</sup>DTRVRGDLGG<sup>12</sup>Q<sup>13</sup>LTHVDQAS<sup>14</sup>FQVDAFGT<sup>15</sup>S<sup>16</sup>ILDVVLN<sup>17</sup>HDL<sup>18</sup>LSSEYIER<sup>19</sup>HI<br/>121 EHG<sup>20</sup>GKTVEVK<sup>21</sup>GGEHCYYQGH<sup>22</sup>IRGNPDSFVA<sup>23</sup>LSTCHGLHGM<sup>24</sup>FYDGNHTYLI<sup>25</sup>EPEENDT<sup>26</sup>Q<sup>27</sup>IE<br/>181 DFH<sup>28</sup>FHSVYK<sup>29</sup>SRLF<sup>30</sup>EFSLDDL<sup>31</sup>PSEFQQVNIT<sup>32</sup>PSK<sup>33</sup>FILKPRP<sup>34</sup>KRSKRQLRRY<sup>35</sup>PRNVEEET<sup>36</sup>KY<br/>241 IELMI<sup>37</sup>VNDH<sup>38</sup>LMF<sup>39</sup>KKHRLSVV<sup>40</sup>HTNTYAKSVV<sup>41</sup>NMADLIYKDQ<sup>42</sup>LKTRIVLVAM<sup>43</sup>ETWATDNKFA<br/>301 ISEN<sup>44</sup>PLITL<sup>45</sup>R<sup>46</sup>E<sup>47</sup>FMKYRRDFI<sup>48</sup>KEKSDAVHLF<sup>49</sup>SGSQFESSRS<sup>50</sup>GAA<sup>51</sup>YIGGICS<sup>52</sup>LLKGGGVNEF<br/>361 GKTD<sup>53</sup>LMAVTL<sup>54</sup>AQSLAHNIGI<sup>55</sup>ISDKRKLASG<sup>56</sup>ECKCEDTWSG<sup>57</sup>CIMGDTGYLL<sup>58</sup>PKKFTQCNIE<br/>421 EYH<sup>59</sup>DFLNSGG<sup>60</sup>GACLFNKPSK<sup>61</sup>LLDPPECGNG<sup>62</sup>FIETGEECD<sup>63</sup>C<sup>64</sup>GTPAECVLEG<sup>65</sup>AECCKKCTLT<br/>481 QDSQCSDGLC<sup>66</sup>CKKCKFQPMG<sup>67</sup>TVCREAVNDC<sup>68</sup>DIRETCSGNS<sup>69</sup>SQCAPNIHKM<sup>70</sup>DGYS<sup>71</sup>CDGVQG<br/>541 IC<sup>72</sup>FGGRCKTR<sup>73</sup>DRQCKYIWGQ<sup>74</sup>KVTASDKYCY<sup>75</sup>EKLNIEGTEK<sup>76</sup>GNCGKDKDTW<sup>77</sup>IQCNRKRDVLC<br/>601 GYLLCTNIGN<sup>78</sup>IPRLGELDGE<sup>79</sup>ITSTLVVQGG<sup>80</sup>RTLNCSSGGHV<sup>81</sup>KLEEDVDLGY<sup>82</sup>VEDGTPCGPQ<br/>661 MMCLEHRCLP<sup>83</sup>VASFNFSTCL<sup>84</sup>SSKEGTICSG<sup>85</sup>NGVCSNELKC<sup>86</sup>V<sup>87</sup>CNRHWIGSD<sup>88</sup>CNTYFPHNDD<br/>721 AKT<sup>89</sup>GITLSGN<sup>90</sup>GVAGTNI<sup>91</sup>IIG<sup>92</sup>IIAGTILVLA<sup>93</sup>LILGITAWGY<sup>94</sup>KNYREQRQLP<sup>95</sup>QGDYVKKPGD<br/>781 GDSFYSDIPP<sup>96</sup>GVSTNSASS<sup>97</sup>KKRSNGLSHS<sup>98</sup>WSERIPDTKH<sup>99</sup>ISDICENGRP<sup>100</sup>RSN<sup>101</sup>SWQGNLG<br/>841 GNKKKIRGKR<sup>102</sup>FRPRNS<sup>103</sup>TET<sup>104</sup>LSPAKSPSSS<sup>105</sup>TGSIASSRKY<sup>106</sup>PYPMPPLPDE<sup>107</sup>DKKVN<sup>108</sup>RQ<sup>109</sup>SAR<br/>901 LWETSI</p> <p>&gt;gi 14423634 sp Q9P0K1.1 ADA22_HUMAN RecName: Full=Disintegrin and metalloproteinase domain-containing protein 22; Short=ADAM 22; AltName: Full=Metalloproteinase-like, disintegrin-like, and cysteine-rich protein 2; AltName: Full=Metalloproteinase-disintegrin ADAM22-3; Flags: Precursor MQAAVAVSV<sup>2</sup>PFLLLCVLGTCP<sup>3</sup>PARCGQAGD<sup>4</sup>ASLMELEK<sup>5</sup>RK<sup>6</sup>ENRFV<sup>7</sup>ERQSI<sup>8</sup>VPLRLI<sup>9</sup>YRSGGEDES<sup>10</sup>RHDAL<sup>11</sup>DTRVRGDLGG<sup>12</sup>Q<sup>13</sup>LTHVDQAS<sup>14</sup>FQVDAFGT<sup>15</sup>S<sup>16</sup>ILDVVLN<sup>17</sup>HDL<sup>18</sup>LSSEYIER<sup>19</sup>HI<sup>20</sup>EHG<sup>21</sup>GKTVEVK<sup>22</sup>GGEHCYYQGH<sup>23</sup>IRGNPDSFVA<sup>24</sup>LSTCHGLHGM<sup>25</sup>FYDGNHTYLI<sup>26</sup>EPEENDT<sup>27</sup>Q<sup>28</sup>IEDF<sup>29</sup>H<sup>30</sup>FHSVYK<sup>31</sup>SRLF<sup>32</sup>EFSLDDL<sup>33</sup>PSEFQQVNIT<sup>34</sup>PSK<sup>35</sup>FILKPRP<sup>36</sup>KRSKRQLRRY<sup>37</sup>PRNVEEET<sup>38</sup>KY<sup>39</sup>IELMI<sup>40</sup>VNDH<sup>41</sup>LMF<sup>42</sup>KKHRLSVV<sup>43</sup>HTNTYAKSVV<sup>44</sup>NMADLIYKDQ<sup>45</sup>LKTRIVLVAM<sup>46</sup>ETWATDNKFA<sup>47</sup>ISEN<sup>48</sup>PLITLREF<sup>49</sup>FMKYRRDFI<sup>50</sup>KEKSDAVHLF<sup>51</sup>SGSQFESSRS<sup>52</sup>GAA<sup>53</sup>YIGGICSLKGGGVNEF<sup>54</sup>GKTD<sup>55</sup>LMAVTLAQSLAHNIGI<sup>56</sup>ISDKRKLASG<sup>57</sup>ECKCEDTWSG<sup>58</sup>CIMGDTGYLL<sup>59</sup>PKKFTQCNIE</p>                                                                                                                                                                                                                                                                                                                                                                                                                                                                                                                                                                                                                                                                                                                                                                            |  |

|                                                                                                                                                                                                                                                                                                                                                                                                                                                                                                                                                                                                                                                                                                                                                                                                                                                                                                                                                                                                                                                                                                                                                                                                                                                                                                                                                                                                                                                                                                                                                                                                                                                                                                                                                                                                                                                                                                                                                                                                                                                                                                                                                                                                                                                                                                                                                                                                                                                                                                                                                                                                                                                                                                                                                                                                                                                                                                                                                                                                                                                                                                                                                                                                                                                                                                                                                                                                                                                                                                                                                                                                                                                                                                                                                                                                                                                                                                                                                                                                                                                                                                                                                                                                                                                                                                                                                                                                                                                                                      |  |
|--------------------------------------------------------------------------------------------------------------------------------------------------------------------------------------------------------------------------------------------------------------------------------------------------------------------------------------------------------------------------------------------------------------------------------------------------------------------------------------------------------------------------------------------------------------------------------------------------------------------------------------------------------------------------------------------------------------------------------------------------------------------------------------------------------------------------------------------------------------------------------------------------------------------------------------------------------------------------------------------------------------------------------------------------------------------------------------------------------------------------------------------------------------------------------------------------------------------------------------------------------------------------------------------------------------------------------------------------------------------------------------------------------------------------------------------------------------------------------------------------------------------------------------------------------------------------------------------------------------------------------------------------------------------------------------------------------------------------------------------------------------------------------------------------------------------------------------------------------------------------------------------------------------------------------------------------------------------------------------------------------------------------------------------------------------------------------------------------------------------------------------------------------------------------------------------------------------------------------------------------------------------------------------------------------------------------------------------------------------------------------------------------------------------------------------------------------------------------------------------------------------------------------------------------------------------------------------------------------------------------------------------------------------------------------------------------------------------------------------------------------------------------------------------------------------------------------------------------------------------------------------------------------------------------------------------------------------------------------------------------------------------------------------------------------------------------------------------------------------------------------------------------------------------------------------------------------------------------------------------------------------------------------------------------------------------------------------------------------------------------------------------------------------------------------------------------------------------------------------------------------------------------------------------------------------------------------------------------------------------------------------------------------------------------------------------------------------------------------------------------------------------------------------------------------------------------------------------------------------------------------------------------------------------------------------------------------------------------------------------------------------------------------------------------------------------------------------------------------------------------------------------------------------------------------------------------------------------------------------------------------------------------------------------------------------------------------------------------------------------------------------------------------------------------------------------------------------------------------------|--|
| <p>EYHDFLNSGGGACLFNPKPSLLDPPCEGNGFIETGEECDGTPAECVLEGAECCKKCTLTQDSQCS DGLC<br/> CKKCKFQPMGTVCREAVNDCDIRETCSGNSSQCAPNIHKMDGYSCDGVQVICFGGRCKTRDRQCKYIWGQ<br/> KVTASDKYCYEKLNIETKGNCGKDKDTWICQNKRDVLCGYLLCTNIGNI PRLGELDGETITSTLVVQQG<br/> RTLNCSSGGHVKLEEDVDLGYVEDGTPCGPQMMCLEHRCLPVASFNFSTCLSSKEGTICSGNGVCSNELKC<br/> VCNRHWIGSDCNTYFPHNDAKTGTLTSGNGVAGTNI IIGI IAGTILVLALLLGI TAWGYKNYREQRLP<br/> QGDYVKKPGDGSFYSYDIPPGVSTNSASSSKRSNGLSHSWSERIPDTKHI SDICENGRPRSNSWQGNLG<br/> GNKKKIRGRFRPRSNSTETLSPA KSPSSSTGSIASSRKY PYPMPPLPDEDKKVNRSARLWETS I</p> <p><b>Notes</b><br/> Transmembrane protein, thought to be an adhesion molecule or a receptor ADAM22 variant 1 (ADAM22v1) has the largest cytoplasmic domain. The cytoplasmic tail has two RSNS 14-3-3 protein consensus binding sites RSNSWQ [amino acids (aa)831-836] and RSNSTE (aa854-859) and mutation of both 14-3-3 consensus sites is needed to abolish interaction with 14-3-3 proteins.</p> <p><b>References to 14-3-3 binding to Adam22</b><br/> Zhu P, Sun Y, Xu R, Sang Y, Zhao J, Liu G, Cai L, Li C, Zhao S. The interaction between ADAM 22 and 14-3-3zeta: regulation of cell adhesion and spreading. <i>Biochem Biophys Res Commun.</i> 2003 Feb 21;301(4):991-9.<br/> Zhu P, Sang Y, Xu R, Zhao J, Li C, Zhao S. The interaction between ADAM22 and 14-3-3beta. <i>Sci China C Life Sci.</i> 2002 Dec;45(6):577-82.<br/> Gödde NJ, D'Abaco GM, Paradiso L, Novak U. Efficient ADAM22 surface expression is mediated by phosphorylation-dependent interaction with 14-3-3 protein family members. <i>J Cell Sci.</i> 2006 Aug 15;119(Pt 16):3296-305.</p>                                                                                                                                                                                                                                                                                                                                                                                                                                                                                                                                                                                                                                                                                                                                                                                                                                                                                                                                                                                                                                                                                                                                                                                                                                                                                                                                                                                                                                                                                                                                                                                                                                                                                                                                                                                                                                                                                                                                                                                                                                                                                                                                                                                                                                                                                                                                                                                                                                                                                                                                                                                                                                                                                                                                                                                                                                                      |  |
| <p><b>Human AKAP13</b> AKAP-Lbc, guanine nucleotide exchange factor (GEF) for RhoA (Swissprot = Q12802)</p> <p>1 M KLNPPQAPL YGDCVVTVLL AEEDKAEDDV VFYLVFLGST LRHCTSTRKV SSDTLETIAP<br/> 61 GHDCCE TVKV QLCASKEGLP VFVVAEEDFH FVQDEAYDAA QFLATSAGNQ QALNFTFRFLD<br/> 121 QSGPPSGDVN SLDKKLVLAF RHLKLPTEWN VLGTDQSLHD AGPRETLMHF AVRRLGLRLT<br/> 181 WFL LQKPGGR GALSIHNQEG ATPVSLALER GYHKLHQLLT EENAGEPDSW SLSYSYIPIYG<br/> 241 DCSVRHREL DIYTLTSED SHHEHPFPGD GCTGPIFKLM NIQQQLMKTN LKQMDSLMPL<br/> 301 MMTAQDPSSA PETDQGF LPC APEPTDPQRL SSSEETESTQ CCGPSPVAQT ESPCDLSSIV<br/> 361 EEENTDRSCR KKNKGVERKG EEVEPAPIVD SGTVSDQDSC LQSLPDCGVK GTEGLSSCGN<br/> 421 RNEETGTKSS GMPTDQESLS SGDAVLQRDL VMEPGTAQYS SGGELGGIST TNVSTPDTAG<br/> 481 EMEHGLMNPD ATVWKNVLQG GESTKERFEN SNIGTAGASD VHVTSKPVDK ISVPCAPAA<br/> 541 SSLDGNKPAE SSLAFSNEET STEKTAETET SRSREESADA PVDQNSVVIP AAAKDKISDG<br/> 601 LEPYTLAAG IGEAMSPSDL ALLGLEEDVM PHQNSSETNS HAQSQK GKSS PICSTTGDDK<br/> 661 LCADSACQQN TVTSSGDLVA KLCDNIVSES ESTTARQPSS QDPPDASHCE DPAHTVTS<br/> 721 PVRDTQERAD FCPFKVVDNK GQRKDVKLDK PLTNMLEVVS HPHVVPKME KELVDPQAVI<br/> 781 SDSTFSLANS PGSESVTKDD ALSFVPSQKE KGTATPELHT ATDYRDGPDG NSNEPDRPL<br/> 841 ELDRAGLSTS STAAELQHGM GNTSLTGLGG EHEGPAPPAI PEALNIKGT DSSLQVSGKA<br/> 901 TLALDSVLTE EGKLLVSES SAAQE QDKDK AVTCS SIKEN ALS SGT LQEE QRTPPPGQDT<br/> 961 QQFHEKSISA DCAKDKALQL SNSPGASSAF LKAETEHNKE VAPQVSLTQ GGAAQSLVPP<br/> 1021 GASLATESRQ EALGAEHNS ALLPCLLPDG SDGSDALNCS QPSPLDVGVK NTQSQKTS<br/> 1081 CEVSGDVTVD VTGNVALQGM AEPRRENISH NTQDILIPNV LLSQEKNAVL GLPVALQDKA<br/> 1141 VTDQGVGTP EMIPLDWEKG KLEGADHSCT MGDAEEA QID DEAHVLLQP VAKELPTDME<br/> 1201 LSAHDDGAPA GVVREVMRAPP SGRERSTPSL PCMVSAQDAP LPKGADLIEE AASRIVDAVI<br/> 1261 EQVKAAGALL TEGEACHMSL SSPELGPLTK GLESAFTEKV STFPPEGSEL MGSTPEEATG<br/> 1321 SLAGCFAGRE EPEKIILPVQ GPEPAAEMPD VKAEDEVDFR ASSISEEVAV GSIALQVLMKM<br/> 1381 QGPMTQAINR ENWCTIEPCP DAASLLASKQ SPECENFLDV GLGRECTSKQ GVLKRESGSD<br/> 1441 SDLFHSPPSD MDSIIFPKPE EEHLACDITG SSSSTDDTAS LDRHSSHGSD VLSLQILKPN<br/> 1501 RSRDRQSLDG FYSHGMGAEG RESESEPADF GDVEEEMDS ITEVPANCSV LRSSMRSLSP<br/> 1561 RRRH WGP GK NAASDAEMNH RSSMRVLGDV VRRPPIHRRS FSLEGLTGGA GVGNGKSPSSL<br/> 1621 EVSSANA EEL RHPFSGEERV DSLVLSLEED LESDQREHRM FDQQICHRSK QQGFNYCTSA<br/> 1681 ISSPLTKSIS LMTISHPGLD NSRPFHSTFH NTSANLTESI TEENYNFLPH SPSKDKSEWK<br/> 1741 SGTKVSRTF S YIKNMSSSK KSKEKEKEK KIKEKEKDS DKEKDKKTVN GHTFSSIPV<br/> 1801 GPISCSQCMK PFTNKDAYTC ANCSAFVHKC CRESLASC AK VKMKQPKGSL QAHDTSLSPT<br/> 1861 VIMRNKPSQP KERPRSAVLL VDETATTPIF ANRRSQSVS LSKSVSIQNI TGVGNDENMS<br/> 1921 NTWKF LSHST DSLNKISKVN ESTESLTDEG VGTDMNEGQL LGDFEIESKQ LEAESWSRII<br/> 1981 DSKFLKQKK DVVKRQEVYI ELMQTEFHVV RTLKIMSGVY SQGMMADLLF EQQMVEKLF<br/> 2041 CLDELISIH S QFFQRILERK KESLVDKSEK NFLIKRIGDV LVNQFSGENA ERLKKT YGKF<br/> 2101 CGQHNQSVNY FKDLYAKDKR FQAFVKKKMS SSVVRLGIP ECILLVTQRI TKYPVLFQRI<br/> 2161 LQCTKDNEVE QEDLAQSLSL VKDVGAVDS KVASYEKVR LNEIYTKTDS KSIMRMKSGQ<br/> 2221 MFAKEDLKRK KLVRDGSVFL KNAAGRLKEV QAVLLTDILV FLQEKDQKI FASLDQKSTV<br/> 2281 ISLKKLIVRE VAHEEKGLFL ISMGMTDPEM VEVHASSKEE RNSWIIQID TINTLNREDE<br/> 2341 EGIPSENEE KKMLDTRARE LKEQLHQKQ KILLLEEKE MIFRDMACE S TPLPEDCSPT<br/> 2401 HSPRVLFRSN TEEALKGGPL MKSAINVEI LQGLVSGNLG GTLGPTVSSP IEQDVGVPVS<br/> 2461 LPRRAETFGG FDSHQMNASK GGEKEEGDDG QDLRRTESDS GLKKGGNANL VFMLKRNSEQ<br/> 2521 VVQSVVHLYE LLSALQGVVL QQDSYIEDQK LVLSERALTR SLRSPSLIE QEKQRSLEKQ<br/> 2581 RQDLANLQKQ QAQYLEEKRR REREWEARER ELREREALLA QREEEVQQGQ QDLEKEREEL<br/> 2641 QQKGT YQYD LERLRAAQKQ LEREQEQLRR EAERLSQRQT ERDLCQVSHP HTKLMRIPSF<br/> 2701 FSPPEEPPSP SAPSIKSGS LDELSVSPK RNSISRTHKD KGFPHILSST SQTNKGPEGQ<br/> 2761 SQAPASTSAS TRLFGLTKPK EKKEKKNK TSRSQPGDGP ASEVSAEGEE IFC</p> <p>&gt;gi 134048676 sp Q12802.2 AKP13_HUMAN RecName: Full=A-kinase anchor protein 13; Short=AKAP 13; AltName: Full=Protein kinase A-anchoring protein 13; AltName: Full=Breast cancer nuclear receptor-binding auxiliary protein; AltName: Full=Human thyroid-anchoring protein 31; AltName: Full=Guanine nucleotide exchange factor Lbc; AltName: Full=AKAP-Lbc; AltName: Full=P47; AltName: Full=Lymphoid blast crisis oncogene; Short=LBC oncogene; AltName: Full=Non-oncogenic Rho GTPase-specific GTP exchange factor</p> <p>M KLNPPQAPLYGDCVVTVLLAEEDKAEDDVVFYLVFLGSTLRHCTSTRKVS SDTLETIAPGHDCCE TVKV<br/> QLCASKEGLPVFVVAEEDFH FVQDEAYDAAQFLATSAGNQALNFTFRFLDQSGPPSGDVNSLDKKLVLAF</p> |  |

|                                                                                                                                                                                                                                                                                                                                                                                                                                                                                                                                                                                                                                                                                                                                                                                                                                                                                                                                                                                                                                                                                                                                                                                                                                                                                                                                                                                                                                                                                                                                                                                                                                                                                                                                                                                                                                                                                                                                                                                                                                                                                                                                                                                                                                                                                                                                                                                                                                                                                                                                                                                                                                                                                                                                                                                                                                                                                                                                                                                                                                                                                                                                                                                                                                                                                                                                                                                                                                                                                                                                               |                                                                                     |
|-----------------------------------------------------------------------------------------------------------------------------------------------------------------------------------------------------------------------------------------------------------------------------------------------------------------------------------------------------------------------------------------------------------------------------------------------------------------------------------------------------------------------------------------------------------------------------------------------------------------------------------------------------------------------------------------------------------------------------------------------------------------------------------------------------------------------------------------------------------------------------------------------------------------------------------------------------------------------------------------------------------------------------------------------------------------------------------------------------------------------------------------------------------------------------------------------------------------------------------------------------------------------------------------------------------------------------------------------------------------------------------------------------------------------------------------------------------------------------------------------------------------------------------------------------------------------------------------------------------------------------------------------------------------------------------------------------------------------------------------------------------------------------------------------------------------------------------------------------------------------------------------------------------------------------------------------------------------------------------------------------------------------------------------------------------------------------------------------------------------------------------------------------------------------------------------------------------------------------------------------------------------------------------------------------------------------------------------------------------------------------------------------------------------------------------------------------------------------------------------------------------------------------------------------------------------------------------------------------------------------------------------------------------------------------------------------------------------------------------------------------------------------------------------------------------------------------------------------------------------------------------------------------------------------------------------------------------------------------------------------------------------------------------------------------------------------------------------------------------------------------------------------------------------------------------------------------------------------------------------------------------------------------------------------------------------------------------------------------------------------------------------------------------------------------------------------------------------------------------------------------------------------------------------------|-------------------------------------------------------------------------------------|
| <p>RHLKLPTEWNVLGTQSLHDAGPRETLMHFAVRLGLLRLTWFLQKPGGRGALS IHNQEGATPVSLALER<br/> GYHKLHLQLLLEENAGEPDSWSSLSYEIPYGDSCVRRHRELDIYTLTSESDSHHEHPFGDGTGPIFKLM<br/> NIQQQLMKTNLKDLMLMTAQDPSSAPETDQGFPLCAPEPTDFQRLSSSEETESTQCCPGSPVAQT<br/> ESPCDLSSIVVEENTDRMLCKKKNKGVKGEVEVPAPIVDVSGTVSDQDSCSLQSLPDCGVKGTGLSSCGN<br/> RNEETGTKSSGMPTDQESLSSGDAVLQRDLVMEPGTAQYSSGGELGGISTNVSTPDTAGEMEHLMPD<br/> ATVWKNVLQGGESTKERFENSNI GTAGASDVHVTSKPVKDISVPCNAPAAASSLDGNKPAESSLAFSNEET<br/> STEKTAETTSRSREESADAPVDQNSVVI PAAAKDKISDGLPEYTLAAGIGEAMSPSDLALLGLEEDVM<br/> PHQNETNSSHAQSQKQKSSPICSTTGDDKLCADSACQONTVTSAGDLVAKLCDNIVSESESTTARQPSS<br/> QDPDASHCEDPQAHTVTSDFVVRTQERADFCPFKVVVNDKQQRKDVKLDKPLTNMLEVSVHPHPVVKME<br/> KELVPDQAVISDSTFSLANSFPGSESVTKDDALS FVPSQKEKGTATPELHTATDYRDGPDGNSNEPDRPL<br/> EDRAVGLSTSSAAELQHGNGNTSLTGLGGEHEGPAPPAIPEALNIKGNLQSVGKATLALDSVLTE<br/> EGKLLVSSSSAAEQDKDKAVTCCS IKENALSSGLQEEQRTPPPQDQTFHEKSI SADCAKDKALQL<br/> SNSPGASSAFLKAETEHNKVAPQVSLTQGGAAQSLVPPGASLATESRQALGAEHNSALLPCLLPDG<br/> SDGSDALNCSQPSPLDVGVKNTQSQGKTSACEVSGDVTVDVTVGNALQGMAPRRENI SHNTQDILIPNV<br/> LLSQEKNAVLGLPVALQDKAVTDPQGVGTPEMI PLDWEKGLLEGADHSCTMGDAEEAQIDDEAHPVLLQP<br/> VAKELPTDMLSAHDDGAPAGVREVMRAPPSSGRERSTPSLPCMVSQAQDAPLFGKADLIEEAASRI VDAVI<br/> EQVKAAGALLTEGEACHMSLSSPELGLTKGLESAPTEKVTSTFPPGESLPMGSTPEEATGSLAGCFAGRE<br/> EPEKILIPVQGPPEAAEMPVKAEDVDFRASSISEEVAVGSIATLKMKGPMPTQAINRENWCTIEPCP<br/> DAASLLASKQSPPECENFLDVGLRECTSKQGVKRESGSDSLFHSFSDMDSIIFPKPEEHLACDITG<br/> SSSTDDTASLDRHSSHGSDPVSLSQILKPNRSDRQSLDGFYSHGMGAEGRESEPADPGDVEEEMDS<br/> ITEVPANCSVLRSSMRSLSPFRRHWSWGPKNAAASDAEMNHRSSMRVLDGVVRRPPIHRRSFSLEGLTGGA<br/> GVGNPKSSSLEVSSANAELRHPPFSGEERVDLSVLSSEEDLESQREHRMFDQOICHRSKQGGFNCTSA<br/> ISSPLTKSISLMTISHPGLDNRPFHSTFHNTSANLTESITENYNFLPHSPSKKDESWKSGTKVSRFTS<br/> YIKNMKSSSKKSKKEKDKIKKEKDKSDKDKKTVNGHTFSSIPVVGPI SCSQCMKPFITNKDAYTC<br/> ANCSAFVHKGCRESLASCAKVKMKQPKGSLQAHDTSLSLPTVIMRNKPSQPKERPRSAVLLVDETATPIF<br/> ANRRSQQSVSLSKSVSIQNTITGVGNENMSNTWKFSLHSTDSLNIKSKVNESTESLTDEGVGTDMMNEGQ<br/> LGDFEIESKQLEAESWSRIIDSKFLKQKQKDVVVRQEVYELMQTEFHHVRTLKMISGVSQGMADLLF<br/> EQQVMEKLFPLDELISIHQFFQRI LERKESLVDKSEKNFLIKRIGDVLVNVQFSGENAERLKKTYGKF<br/> CGQHNQSVNYFKDLYAKDKRFQAFVKKKMS SVVRRLGIPECILLVTQRI TKYPVLFQRI LQCTKDNEVE<br/> QEDLAQSLSLVKDVI GAVDSKVASYEKKVRLNEIYTKTDSKSI MRMSKGMFAKEDLKRKLLVRDGSVFL<br/> KNAAGRLKEVQAVLLTDILVFLQEKDQKYIFASLDQKSTVLSLKLIVREVAHEEKGLFLISMGMTPDEM<br/> VQYVLEEKRRREREWELRERELREREALLAQREEVQGGQDLEKEREELQKKGTYQYDLERLRAAQKQ<br/> LEREQEQLRREAERLSQRQTERDLCQVSHPHTKLMRIPSFPPSPPEPPSPAPSIAKSGSLDSELSVSPK<br/> RNSISRTHKDKGPFPHILSSSTQTNKGPQSQAPASTSASTRLFGLTKPKKKEKKEKKNKT SRSQPGDG<br/> ASEVSAEGEEIFC</p> <p><b>Notes</b><br/> 14-3-3-binding site = pSer1565<br/> PKA dependant binding to 14-3-3.</p> <p><b>References to 14-3-3 binding to AKAP13</b><br/> Diviani D, Abuin L, Cotecchia S, Pansier L (2004) Anchoring of both PKA and 14-3-3 inhibits the Rho-GEF activity of the AKAP-Lbc signaling complex. EMBO J 23, 2811-20<br/> Baisamy L, Jurisch N, Diviani D. Leucine zipper-mediated homo-oligomerization regulates the Rho-GEF activity of AKAP-Lbc. J Biol Chem. 2005 Apr 15;280(15):15405-12.<br/> Jin J, Smith FD, Stark C, Wells CD, Fawcett JP, Kulkarni S, Metalnikov P, O'Donnell P, Taylor P, Taylor L, Zougman A, Woodgett JR, Langeberg LK, Scott JD, Pawson T. Proteomic, functional, and domain-based analysis of in vivo 14-3-3 binding proteins involved in cytoskeletal regulation and cellular organization. Curr Biol. 2004 Aug 24;14(16):1436-50.</p> |                                                                                     |
| <p><b>Human Akirin2</b> (aka fourteen-three-three beta interactant 1 FBII (C6orf166)) NP_060534 (Swissprot = Q53H80)<br/> 1 MACGATLKRT LDFDPLLSPA SPKRRRCAPL SAPTSAAASP LSAAAAAAS FSAAAASPQK<br/> 61 YLRMEPSPFG DVSSRLTTEQ ILYNIKQYK RMQRRHLET SFQEDPCCT SDAQPHAFLL<br/> 121 SGPASPGTSS AASPLKKEQ PLFTLRQVGM ICERLLKERE EKVREEYEEI LNTKLAEQYD<br/> 181 AFVKFTHDQI MRRYGEQPAS YVS</p> <p>&gt;gi 71152385 sp Q53H80.2 AKIR2 HUMAN RecName: Full=Akirin-2<br/> MACGATLKRTLDFDPLLSPASPKRRRCAPLSAPTSAAASPLSAAAAAASFSAAAASPQKYLMEPSPFG<br/> DVSSRLTTEQILYNIKQYKRMQRRHLET SFQEDPCCTSDAQPHAFLLSGPASPGTSSAASSPLKKEQ<br/> PLFTLRQVGMICERLLKEREKVREEYEEI LNTKLAEQYDAFVKFTHDQIMRRYGEQPAS YVS</p> <p><b>Notes</b><br/> “Putative 14-3-3-binding sites were converted to Ala and designated as S31A, T103A, S111A, S119A, and S131A, respectively. These mutants were inserted into pACT2, and the interaction with 14-3-3β was analyzed using the yeast two-hybrid system. All mutants did not bind to 14-3-3β (Fig. 2C), suggesting that multiple 14-3-3β-binding motifs of FBII are required for the interaction with 14-3-3β. (Komiva et al 2008).” Note that Komiva et al studied the rat protein, and here the human sequence is shown. Note that Rat Ser103 is Ala in the mouse sequence and Ser111 is Ala113 in the human sequence. There is a related protein Akirin 1 (Mighty) whose expression is regulated by myostatin. Akirin2, is required for NF-kappaB-mediated gene transcription.<br/> Sasaki S, Yamada T, Sukegawa S, Miyake T, Fujita T, Morita M, Ohta T, Takahagi Y, Murakami H, Morimatsu F, Sasaki Y. Association of a single nucleotide polymorphism in akirin 2 gene with marbling in Japanese Black beef cattle. BMC Res Notes. 2009 Jul 14;2:131.</p> <p><b>References to 14-3-3 binding to human Akirin2</b><br/> Macqueen DJ, Johnston IA. Evolution of the multifaceted eukaryotic akirin gene family. BMC Evol Biol. 2009 Feb 6;9:34.<br/> Komiya Y, Kurabe N, Katagiri K, Ogawa M, Sugiyama A, Kawasaki Y, Tashiro F. A novel binding factor of 14-3-3beta functions as a transcriptional repressor and promotes anchorage-independent growth, tumorigenicity, and</p>                                                                                                                                                                                                                                                                                                                                                                                                                                                                                                                                                                                                                                                                                                                                                                                                                                                                                                                                                                                                                                                                                                                                                                                                                                                                                                                                                    | <p>SITES NOT ALL CONSERVED AND NOT CERTAIN TO BE PHOSPHORYLATED, NOT IN WEBLOGO</p> |

|                                                                                                                                                                                                                                                                                                                                                                                                                                                                                                                                                                                                                                                                                                                                                                                                                                                                                                                                                                                                                                                                                                                                                                                                                                                                                                                                                                                                                                                                                                                                                                                                                                                                                                                                                                                                                                                                                                                                                                                                                                                                                                                                                                                                                                                                                                                                                                                                                                                                                                                                                                                                                                                                                                                                                                                                                                                                                                                                                                                                                                                                                                                                                                                                                                                                                                                                                                                                                                                                                                                                                                                                                                                                                                                                                                                                                                                                                                                                                                                                                                                                                                                                                                                                                                                                                                                                                                                                                                                                                                                                                                                                                                                                                                                                                                                                                                                                                                                                                                                                                                                                                                                                                                                                                                                                                                                                                                                                                                                                                                                                                                                                                                                                                                                                                                                                                                                                                                                                                                                                                                                                                                                                                                                                                                                                                                                                                                                                                                                                                                                                                                              |  |
|------------------------------------------------------------------------------------------------------------------------------------------------------------------------------------------------------------------------------------------------------------------------------------------------------------------------------------------------------------------------------------------------------------------------------------------------------------------------------------------------------------------------------------------------------------------------------------------------------------------------------------------------------------------------------------------------------------------------------------------------------------------------------------------------------------------------------------------------------------------------------------------------------------------------------------------------------------------------------------------------------------------------------------------------------------------------------------------------------------------------------------------------------------------------------------------------------------------------------------------------------------------------------------------------------------------------------------------------------------------------------------------------------------------------------------------------------------------------------------------------------------------------------------------------------------------------------------------------------------------------------------------------------------------------------------------------------------------------------------------------------------------------------------------------------------------------------------------------------------------------------------------------------------------------------------------------------------------------------------------------------------------------------------------------------------------------------------------------------------------------------------------------------------------------------------------------------------------------------------------------------------------------------------------------------------------------------------------------------------------------------------------------------------------------------------------------------------------------------------------------------------------------------------------------------------------------------------------------------------------------------------------------------------------------------------------------------------------------------------------------------------------------------------------------------------------------------------------------------------------------------------------------------------------------------------------------------------------------------------------------------------------------------------------------------------------------------------------------------------------------------------------------------------------------------------------------------------------------------------------------------------------------------------------------------------------------------------------------------------------------------------------------------------------------------------------------------------------------------------------------------------------------------------------------------------------------------------------------------------------------------------------------------------------------------------------------------------------------------------------------------------------------------------------------------------------------------------------------------------------------------------------------------------------------------------------------------------------------------------------------------------------------------------------------------------------------------------------------------------------------------------------------------------------------------------------------------------------------------------------------------------------------------------------------------------------------------------------------------------------------------------------------------------------------------------------------------------------------------------------------------------------------------------------------------------------------------------------------------------------------------------------------------------------------------------------------------------------------------------------------------------------------------------------------------------------------------------------------------------------------------------------------------------------------------------------------------------------------------------------------------------------------------------------------------------------------------------------------------------------------------------------------------------------------------------------------------------------------------------------------------------------------------------------------------------------------------------------------------------------------------------------------------------------------------------------------------------------------------------------------------------------------------------------------------------------------------------------------------------------------------------------------------------------------------------------------------------------------------------------------------------------------------------------------------------------------------------------------------------------------------------------------------------------------------------------------------------------------------------------------------------------------------------------------------------------------------------------------------------------------------------------------------------------------------------------------------------------------------------------------------------------------------------------------------------------------------------------------------------------------------------------------------------------------------------------------------------------------------------------------------------------------------------------------------------------------------|--|
| <p>metastasis. <i>J Biol Chem.</i> 2008 Jul 4;283(27):18753-64.</p> <p><b>Human AKT1S1 (PRAS40)</b> (Swissprot = Q96B36)</p> <p>1 MASGRPEELW EAVVGAAERF RARTGTGLVL LTAAPPPPPR PGPCAYAAHG RGALAEAAARR<br/> 61 CLHDIALAHR AATAARPPAP PPAQPPSPPT PSPRPPTLAR EDNEEDEDEP TETETSGEQL<br/> 121 GISDNGGLFV MDEDATLQDL PPFCESDPES TDDGSLSEET PAGPPTCSVP PASALPTQQY<br/> 181 AKSLPVSVPV WGFKEKRTEA RSSDEENGPP SSPDLDRIAA SMRALVLRREA EDTQVFGDLF<br/> 241 RPRLNLSDFQ KLKRRY</p> <p>&gt;gi 74731194 sp Q96B36.1 AKT1S1_HUMAN RecName: Full=Proline-rich AKT1 substrate 1; AltName: Full=40 kDa proline-rich AKT substrate<br/> MASGRPEELWEAVVGAAERFRARTGTGLVLLTAAPPPPPRPGPCAYAAHGRGALAEAAARRCLHDIALAHR<br/> AATAARPPAPPPAPQPPSPPTPSPRPPTLAREDNEDNEDEDEPTETETSGEQLGISDNGGLFVMEDEDATLQDL<br/> PPFCESDPESTDDGSLSEETPAGPPTCSVPASALPTQQYAKSLPVSVPVWGFKEKRTEARSSDEENGPP<br/> SSPDLDRIAASMRALVLRREAEDTQVFGDLRPRRLNLSDFQKLKRRY</p> <p><b>Notes</b></p> <p>Akt1S1 plays a role in phosphatidylinositol 3-kinase (PI3K)/AKT survival signaling. PRAS40 is a physiological target of <i>in vivo</i> insulin action. Hyperinsulinemia increased its phosphorylation in human skeletal muscle biopsies. Phosphorylated PRAS40 is predominantly localized to the nucleus. In rats fed a high-fat diet (HFD), phosphorylation of PRAS40 was markedly reduced when compared with low-fat diet-fed animals in all tissues examined. A novel mTOR binding partner that mediates Akt signals to mTOR. Binding of PRAS40 inhibits mTOR activity and suppresses constitutive activation of mTOR in cells lacking TSC2. Phosphorylation by Akt and perhaps related kinases leads to its binding to 14-3-3. Two alternatively spliced isoforms have been described. PRAS40 is a novel substrate of Akt, the phosphorylation of which leads to the binding of this protein to 14-3-3. PRAS40 phosphorylation by Akt and association with 14-3-3, a cytosolic anchor protein, are crucial for insulin to stimulate mTOR. PRAS40<sup>T246E</sup> and PRAS40<sup>T246D</sup> could not bind 14-3-3, further indicating that PRAS40-14-3-3 interaction is important for mTOR activation. The 14-3-3 binding may lead to facilitated release of PRAS40 from mTOR, or loose association of PRAS40 with mTOR, to activate mTOR and to inactivate IRS-1 through the negative feedback regulation.</p> <p>activation of mTORC1 signalling by phorbol esters does not require PRAS40 to be phosphorylated at Thr(246), bind to 14-3-3 or be released from mTORC1. It is conceivable that phorbol esters activate mTORC1 by a distinct mechanism not involving PRAS40. Indeed, our results suggest that PRAS40 may not actually be involved in controlling mTORC1, but rather be a downstream target of mTORC1 that is regulated in response only to specific stimuli, such as insulin.</p> <p>mutation of Ser-221 to Ala reduces the interaction with 14-3-3 to the same extent as mutation of Thr-246, the Akt/protein kinase B-phosphorylated site. We also find that mutation of Ser-221 to Ala increases the inhibitory activity of PRAS40 toward mTORC1. We propose that after mTORC1 kinase activation by upstream regulators, PRAS40 is phosphorylated directly by mTOR, thus contributing to the relief of PRAS40-mediated substrate competition.</p> <p><b>References to 14-3-3 binding to PRAS40</b></p> <p>Kovacina KS, Park GY, Bae SS, Guzzetta AW, Schaefer E, Birnbaum MJ, Roth RA. Identification of a proline-rich Akt substrate as a 14-3-3 binding partner. <i>J Biol Chem.</i> 2003 Mar 21;278(12):10189-94</p> <p>Vander Haar E, Lee SI, Bandhakavi S, Griffin TJ, Kim DH. Insulin signalling to mTOR mediated by the Akt/PKB substrate PRAS40. <i>Nat Cell Biol.</i> 2007 Mar;9(3):316-23</p> <p>Fonseca BD, Lee VH, Proud CG. The binding of PRAS40 to 14-3-3 proteins is not required for activation of mTORC1 signalling by phorbol esters/ERK. <i>Biochem J.</i> 2008 Apr 1;411(1):141-9.</p> <p>Fonseca BD, Smith EM, Lee VH, MacKintosh C, Proud CG. PRAS40 is a target for mammalian target of rapamycin complex 1 and is required for signaling downstream of this complex. <i>J Biol Chem.</i> 2007 Aug 24;282(34):24514-24.</p> <p>Wang L, Harris TE, Lawrence JC Jr. Regulation of proline-rich Akt substrate of 40 kDa (PRAS40) function by mammalian target of rapamycin complex 1 (mTORC1)-mediated phosphorylation. <i>J Biol Chem.</i> 2008 Jun 6;283(23):15619-27.</p> <p>Dubois F, Vandermoere F, Gernez A, Murphy J, Toth R, Chen S, Geraghty KM, Morrice NA, Mackintosh C. Differential 14-3-3-affinity capture reveals new downstream targets of PI 3-kinase signaling. <i>Mol Cell Proteomics.</i> 2009 Aug 1.</p> <p>Zhang F, Beharry ZM, Harris TE, Lilly MB, Smith CD, Mahajan S, Kraft AS. PIM1 protein kinase regulates PRAS40 phosphorylation and mTOR activity in FDCP1 cells. <i>Cancer Biol Ther.</i> 2009 May;8(9):846-53.</p> <p>Sancak Y, Thoreen CC, Peterson TR, Lindquist RA, Kang SA, Spooner E, Carr SA, Sabatini DM. PRAS40 is an insulin-regulated inhibitor of the mTORC1 protein kinase. <i>Mol Cell.</i> 2007 Mar 23;25(6):903-15.</p> <p>Harthill JE, Pozuelo Rubio M, Milne FC, MacKintosh C. Regulation of the 14-3-3-binding protein p39 by growth factors and nutrients in rat PC12 pheochromocytoma cells. <i>Biochem J.</i> 2002 Dec 1;368(Pt 2):565-72.</p> <p><b>Human ARAF1 (ARAF)</b> (Swissprot = P10398)</p> <p>1 MEPPRGGPPAN GAEPSRAVGT VKVYLPNKQR TVVTVRDGMV VYDSLKALK VRGLNQDCCV<br/> 61 VYRLIKGRKT VTAWDTAIAP LDGEELIVEV LEDVPLTMHN FVRKTFFSLA FCDFCLKFLF<br/> 121 HGFRCQTCGY KFHQHCSSKV PTVCVDMSTN RQQFYHSVQD LSGGSRQHEA PSNRPLNELL<br/> 181 TPQGPSERTQ HCDPEHFPPF APANAPLQRI RSTSTPNVHM VSTTAPMDSN LIQLTGQSFS<br/> 241 TDAAGSRGGS DGTPRGSPSP ASVSSGRKSP HSKSPAEQRE RKSLADDDKKK VKNLGYRDSG<br/> 301 YYWEVPPSEV QLLKRIGTGS FGTVFRGRWH GDVAVKVLKV SQPTAEQAQA FKNEMQVLRK<br/> 361 TRHVNILLFM GFMTRPGFAI ITQWCEGSSL YHHLHVADTR FDMVQLIDVA RQTAQGMDYL<br/> 421 HAKNIHRDL KSNNI FLHEG LTVKIGDFGL ATVKTRWSGA QPLEQPSGVS LWMMAEVIRM<br/> 481 QDPNPYSFQS DVYAYGVVLY ELMTGLSPYS HIGCRDQIIF MVGRGYLSPD LSKISSNCPK<br/> 541 AMRRLSDDL KFRQREERPLF PQILATIELL QRSLPKIERS ASFSPSLHRTQ ADELPACLLS<br/> 601 AARLVP</p> <p>&gt;gi 1730068 sp P10398.2 ARAF_HUMAN RecName: Full=A-Raf proto-oncogene serine/threonine-protein kinase; AltName: Full=A-raf-1; AltName: Full=Proto-oncogene Pks<br/> MEPPRGGPPANGAEPSRAVGTVKVYLPNKQRTVVTVRDGMVYDSLKALKVRGLNQDCCVVYRLIKGRKT<br/> VTAWDTAIAPLDGEELIVEVLEDVPLTMHNFVRKTFFSLAFCDFCLKFLFHGFRCQTCGYKFHQHCSSKV</p> |  |
|------------------------------------------------------------------------------------------------------------------------------------------------------------------------------------------------------------------------------------------------------------------------------------------------------------------------------------------------------------------------------------------------------------------------------------------------------------------------------------------------------------------------------------------------------------------------------------------------------------------------------------------------------------------------------------------------------------------------------------------------------------------------------------------------------------------------------------------------------------------------------------------------------------------------------------------------------------------------------------------------------------------------------------------------------------------------------------------------------------------------------------------------------------------------------------------------------------------------------------------------------------------------------------------------------------------------------------------------------------------------------------------------------------------------------------------------------------------------------------------------------------------------------------------------------------------------------------------------------------------------------------------------------------------------------------------------------------------------------------------------------------------------------------------------------------------------------------------------------------------------------------------------------------------------------------------------------------------------------------------------------------------------------------------------------------------------------------------------------------------------------------------------------------------------------------------------------------------------------------------------------------------------------------------------------------------------------------------------------------------------------------------------------------------------------------------------------------------------------------------------------------------------------------------------------------------------------------------------------------------------------------------------------------------------------------------------------------------------------------------------------------------------------------------------------------------------------------------------------------------------------------------------------------------------------------------------------------------------------------------------------------------------------------------------------------------------------------------------------------------------------------------------------------------------------------------------------------------------------------------------------------------------------------------------------------------------------------------------------------------------------------------------------------------------------------------------------------------------------------------------------------------------------------------------------------------------------------------------------------------------------------------------------------------------------------------------------------------------------------------------------------------------------------------------------------------------------------------------------------------------------------------------------------------------------------------------------------------------------------------------------------------------------------------------------------------------------------------------------------------------------------------------------------------------------------------------------------------------------------------------------------------------------------------------------------------------------------------------------------------------------------------------------------------------------------------------------------------------------------------------------------------------------------------------------------------------------------------------------------------------------------------------------------------------------------------------------------------------------------------------------------------------------------------------------------------------------------------------------------------------------------------------------------------------------------------------------------------------------------------------------------------------------------------------------------------------------------------------------------------------------------------------------------------------------------------------------------------------------------------------------------------------------------------------------------------------------------------------------------------------------------------------------------------------------------------------------------------------------------------------------------------------------------------------------------------------------------------------------------------------------------------------------------------------------------------------------------------------------------------------------------------------------------------------------------------------------------------------------------------------------------------------------------------------------------------------------------------------------------------------------------------------------------------------------------------------------------------------------------------------------------------------------------------------------------------------------------------------------------------------------------------------------------------------------------------------------------------------------------------------------------------------------------------------------------------------------------------------------------------------------------------------------------------------------------------------------|--|

|                                                                                                                                                                                                                                                                                                                                                                                                                                                                                                                                                                                                                                                                                                                                                                                                                                                                                                                                                                                                                                                                                                                                                                                                                                                                                                                                                                                                                                                                                                                                                                                                                                                                                                                                                                                                                                                                                                                                                                                                                                                                                                                                                                                                                                                                                                                                                                                                                                                                                                                                                                                                                                                                                                                                                                                                                                                                                                                                                                                                                                                                                                                                                                                                                                                   |                                                                                                                         |
|---------------------------------------------------------------------------------------------------------------------------------------------------------------------------------------------------------------------------------------------------------------------------------------------------------------------------------------------------------------------------------------------------------------------------------------------------------------------------------------------------------------------------------------------------------------------------------------------------------------------------------------------------------------------------------------------------------------------------------------------------------------------------------------------------------------------------------------------------------------------------------------------------------------------------------------------------------------------------------------------------------------------------------------------------------------------------------------------------------------------------------------------------------------------------------------------------------------------------------------------------------------------------------------------------------------------------------------------------------------------------------------------------------------------------------------------------------------------------------------------------------------------------------------------------------------------------------------------------------------------------------------------------------------------------------------------------------------------------------------------------------------------------------------------------------------------------------------------------------------------------------------------------------------------------------------------------------------------------------------------------------------------------------------------------------------------------------------------------------------------------------------------------------------------------------------------------------------------------------------------------------------------------------------------------------------------------------------------------------------------------------------------------------------------------------------------------------------------------------------------------------------------------------------------------------------------------------------------------------------------------------------------------------------------------------------------------------------------------------------------------------------------------------------------------------------------------------------------------------------------------------------------------------------------------------------------------------------------------------------------------------------------------------------------------------------------------------------------------------------------------------------------------------------------------------------------------------------------------------------------------|-------------------------------------------------------------------------------------------------------------------------|
| <p>PTVCVDMSTNRQQFYHSVQDLGGSRQHEAPSNRPLNELLPQGPSRPTQHCDEPHFFFPANAPLQRI<br/>RSTSTPNVHMVSTTAPMDSNLIQLTGQSFSTDAAGSRGGSDGTPRGSPSPASVSSGRKSPHKSAPAEQRE<br/>RKS LADDKKVKNLGYRDSGYWEVPPSEVQLLKRIGTGSFGTVFRGRWHDVAVKVLKVSQPTAEQAQA<br/>FKNEMQVLRKTRHVNILLFMGMTRPGFATITQWCEGSSLYHHLHVADTRFDMVQLIDVARQTAQGMDYL<br/>HAKNI IHRDLKSNINIFLHEGLTVKIGDFGLATVVKTRWGAQPLEQPSGVLWMAAEVIRMQDPNPYFQFS<br/>DVYAYGVVLYELMTGSLPYSHIGCRDQIIFMVGRGYLSPDLKISINCNPKAMRRLSDCLKFKQREERPLF<br/>PQILATIELLQSRSLPKIERSASEPSLHRTQADELPACLLSARLVP</p> <p><b>Notes</b><br/><b>References to 14-3-3-binding to ARaf1 (Also see references for BRaf and CRaf.)</b><br/>Kobayashi T, Aoki Y, Niihori T, Cavé H, Verloes A, Okamoto N, Kawame H, Fujiwara I, Takada F, Ohata T, Sakazume S, Ando T, Nakagawa N, Lapunzina P, Meneses AG, Gillissen-Kaesbach G, Wieczorek D, Kurosawa K, Mizuno S, Ohashi H, David A, Philip N, Guliyeva A, Narumi Y, Kure S, Tsuchiya S, Matsubara Y. Molecular and clinical analysis of RAF1 in Noonan syndrome and related disorders: dephosphorylation of serine 259 as the essential mechanism for mutant activation. <i>Hum Mutat.</i> 2010 Jan 5. [Epub ahead of print]</p>                                                                                                                                                                                                                                                                                                                                                                                                                                                                                                                                                                                                                                                                                                                                                                                                                                                                                                                                                                                                                                                                                                                                                                                                                                                                                                                                                                                                                                                                                                                                                                                                                                                                                                                                                                                                                                                                                                                                                                                                                                                                          |                                                                                                                         |
| <p><b>Human ARHGEF2</b> GEF-H1 microtubule-localized Rho exchange factor (Swissprot = Q92974)</p> <p>1 MSRIE SLTRA RIDRSRELAS KTREREKMK EAKDARYTNGH LFTTISVSGM TMCYACNKSI<br/>61 TAKEALICPT CNVTIHNRCCK DTLANCTKV KQKQKAALLK NNTALQSVSL RSKTTIRERP<br/>121 SS AIYPSDSF RQSLGSRRG RSSLSLAKSV STTNIAGHFN DESPLGLRRI LSQSTDSLNM<br/>181 RNRTL SVESL IDEAEVIYSE LMSDFEMDEK DFAADSWSLA VDS SFLQGHK KEVMMKQDVI<br/>241 YELIQTELHH VRTLKIMTRL FRTGMLEELH LEPGVVQGLF PCVDELSDIH TRFLS QLLER<br/>301 RQALCPGSR RNFVIHRLGD LLSQFSGPS AEQMCKTYSE FCSRHSKALK LYKELYARDK<br/>361 RFQQFIRKVT RPAVLKRHGV QECILLVTQR ITKYPLLISR ILQSHSGIEE ERQDLTTALG<br/>421 LVKELLSNVD EGIYQLEKGA RLQEIYNRMD PRAQTPVPGK GPFGRELLR RKLIDHGCLL<br/>481 WKTATGRFKD VLVLMTDVL VFLQEKDQKY IFPTLDKPSV VSLQNLIVRD IANQEKGMFL<br/>541 ISAAPPEMYE VHTASRDDR TWIRVIQSV RTCP SREDFP LIETEDEAYL RRIKME LQQK<br/>601 DRALVELLRE KVGLFAEMTH FQAEEDGGSG MALPTLPRGL FRSESLES PR GERLLQDAIR<br/>661 EVEGLKDLLV GPGVELLLTP REPALPLEPD SGNTSPGVT ANGEARTFNG SIELCRADSD<br/>721 SSQRDRNGNQ LRS PQEEALQ RLVNLYGLLH GLQAAVAQD TLMEARFPEG PERREKLCRA<br/>781 NSRDGEAGRA GAAPVAPEKQ ATELALLQRQ HALLQEELRR CRRLGEEERAT EAGSLEARLR<br/>841 ESEQARALLE REAE EARRQL AALGQTEPLP AEAPWARRPV DPRRRSLPAG DALYLSFNPP<br/>901 QPSRGTDRLD LPVTTRSVHR NFEDRERQEL GSPEERLQDS SDPDTGSEEE GSSRLSPPHS<br/>961 PRDFTRMQDI PEETESRDGE AVASES</p> <p>&gt;gi 205830906 sp Q92974.4 ARHG2_HUMAN RecName: Full=Rho guanine nucleotide exchange factor 2; AltName: Full=Guanine nucleotide exchange factor H1; Short=GEF-H1; AltName: Full=Microtubule-regulated Rho-GEF; AltName: Full=Proliferating cell nuclear antigen p40<br/>MSRIE SLTRARIDRSRELASKTREKEMKEAKDARYTNGHLFTTISVSGMTMCYACNKSI TAKEALICPT CNVTIHNRCCKDTLANCTKV KQKQKAALLK NNTALQSVSL RSKTTIRERPSSAIYPSDSFRQSLGSRRG RSSLSLAKSVSTTNIAGHFNDESPLGLRRI LSQSTDSLNMNRNRTL SVESL IDEAEVIYSE LMSDFEMDEK DFAADSWSLAVDSSFLQGHKKEVMMKQDVIYELIQTELHHVRTLKIMTRLFRTGMLEELHLEPGVVQGLF PCVDELSDIHTRFLS QLLERLERRRQALCPGSTRNFVIHRLGDLLISQFSGPSAEQMCKTYSE FCSRHSKALK LYKELYARDKRFQQFIRKVT RPAVLKRHGVQECILLVTQRITKYPLLISRILQSHSGIEEERQDLTTALG LVKELLSNVD EGIYQLEKGA RLQEIYNRMD PRAQTPVPGK GPFGRELLR RKLIDHGCLLWKTATGRFKD VLVLMTDVLVFLQEKDQKY IFPTLDKPSV VSLQNLIVRD IANQEKGMFLISAAPPEMYE VHTASRDDR TWIRVIQSVRTCP SREDFP LIETEDEAYL RRIKME LQQKDRALVELLREKVGLFAEMTH FQAEEDGGSG MALPTLPRGLFRSESLES PRGERLLQDAIREVEGLKDLLV GPGVELLLTPREPALPLEPD SGNTSPGVT ANGEARTFNGS IELCRADSDSSQRDRNGNQLRS PQEEALQ RLVNLYGLLHGLQAAVAQD TLMEARFPEG PERREKLCRANSRDGEAGRAGAAPVAPEKQATELALLQRQHALLQEELRR CRRLGEEERATEAGSLEARLR ESEQARALLE REAE EARRQLAALGQTEPLP AEAPWARRPV DPRRRSLPAG DALYLSFNPPQPSRGTDRLD LPVTTRSVHRNFEDRERQELGSPEERLQDSSDPDTGSEEEGSSRLSPPHS PRDFTRMQDI PEETESRDGE AVASES</p> <p><b>Notes</b><br/>Phosphorylation of GEF-H1 at Ser(885) by PAK1 induces 14-3-3 binding to the exchange factor and relocation of 14-3-3 to microtubules (= Ser 886 in Q92974)</p> <p><b>References to 14-3-3-binding to ARHGEF2 (GEF-H1)</b><br/>Zenke FT, Krendel M, DerMardirossian C, King CC, Bohl BP, Bokoch GM. p21-activated kinase 1 phosphorylates and regulates 14-3-3 binding to GEF-H1, a microtubule-localized Rho exchange factor. <i>J Biol Chem.</i> 2004 Apr 30;279(18):18392-400.</p> |                                                                                                                         |
| <p><b>Human ARHGEF7</b> (beta-Pix, COOL-1) (Swissprot = Q14155)</p> <p>1 MNSAEQTVTW LITLGVLESP KKTISDPEGF LQASLKDGVV LCRLLERLLP GTIEKVYPEP<br/>61 RSESECLSN IREFLRGCGAS LRLELLFPPS QPPQHLVTTI LLSASTFDAN DLYQGGQFNK<br/>121 VLSSLVTLNK VTADILGSD SVCARPSHR IKSFDLSGSQ SLHTRTSKLF QGQYRSLDMT<br/>181 DNSNNQLVVR AKFNFOQTNE DELSFSKGDV IHVTRVEEGG WVEGTLNGRT GWFPSNYVRE<br/>241 VKASEKPVSP KSGTLKSPPK GFDPTAINKS YYNVVLQNIL ETENEYSKEL QTVLSTYLRP<br/>301 LQTSEKLSSA NISYLMGNLE EICSFQQLV QSLEECTKLP EAQQRVGGCF LNLMPQMKT<br/>361 LYTYCANHSA AVNVLTEHSE ELGEFMETG ASSPGILVLT TGLSKPFMRL DKYPTLLKEL<br/>421 ERHMEDYHTD RQDIQKSMMA FKNLSAQCE VRKRKELELQ ILTEAIRNWE GDDIKTLGNV<br/>481 TYMSQVLIQC AGSEEKNER YLLLFPNVLLM LSASPRMSGF IYQGKLPPTG MTITKLEDSE<br/>541 NHRNAFEISG SMIERILVSC NNQDLQEWV EHLQKQTKVT SVGNPTIKPH SVP SHTLP SH<br/>601 PVTSSKHD SKPAPLTPAY HTLPHPSHHG TPHTTINWGP LEPPKTPKPW SLSCLRPAAP<br/>661 LRPSAALCYK EDLSKSPKTM KKL LPKRKP E RKPSDEEFAS RKSTAAL EED AQILKVIEAY<br/>721 CTS AKTRQTL NSTWQGTDL MHNHVLADDDQ PSLDSLGRRS SLSRLEPSDL SEDSDYDSIW<br/>781 TAHSYRMGST SRKSCCSYIS HQN</p> <p>&gt;gi 50403776 sp Q14155.2 ARHG7_HUMAN RecName: Full=Rho guanine nucleotide exchange factor 7; AltName: Full=PAK-interacting exchange factor beta; AltName: Full=Beta-Pix; AltName: Full=COOL-1; AltName: Full=p85</p>                                                                                                                                                                                                                                                                                                                                                                                                                                                                                                                                                                                                                                                                                                                                                                                                                                                                                                                                                                                                                                                                                                                                                                                                                                                                                                                                                                                                                                                                                                                                                                                                                                                                                                                                                                                                                                                                                                                   | <p>DATA INDICATE DIRECT INTERACTION BETWEEN ARHGEF7 PROTEIN AND 14-3-3-, BUT SITE(S) NOT IDENTIFIED. NOT IN WEBLOG.</p> |

MNSAEQTVTWLITLGVLES PKKTI SDPEGFLQASLKDGVVLCRLLELLPGTIEKVYPEPRSESECLSNIREFLRGCASLRLELLFPSPQPQLVTTILLASATFDANDLYQQQNFNKLSSSLVTLNKVVTADIGLGS SVCARPSSSHRIKSFSLGSLHTRTSKLFQGGYRSLDMT DNSNNQLVVRAKFNFFQQTNEDELSFSKGDV IHVTRVEEGGWEGTLNGRTGWFPSSNYVREVKASEKPVSPKSGTLKSPKGFDTTAINKSYNNVVLQNIL ETENEYSKELQTVLSTYLRPLQTSKLSANISYLMGNLEIEICSFQQLVQSLSEECTKLPEAQQRVGGCF LNLMPQMKTYLYTYCANHPSAVNVLTHESEELGEFMETKGAASSPGILVLTGSLKPFMRDLKYPTLLKEL ERHMEDYHTDRQDIQKSMAAFKNLSAQCCQEVRRKRELELQILTEAIRNWEQDDIKTLGNVYMSQVLIQC AGSEEKNERYL LFPNVLLMLSASPRMSGFIYQKLPPTGMTITKLEDSENHRNAFEISGSMIERILVSC NNQDLQEWVEHLQKQTKVTSVGNPTIKPHSVPSHTLPSHPVTPSSKHADSKPAPLTPAYHTLPHPSHHG TPHTTINWGPLEPKTPKPSLSCLRPAAPLRPSAALCYKEDLSKSPKTMKLLPKRKRPERKPSDEEFAS RKSTAALLEEDAQILKVIEWEYCTSAKTRQTLNSTWQGTDLMHNVLADDDQPSLDSLGRSSLSRLEPSDL SEDSDYDSI WTAHSYRMGSTSRKSCSYISHQN

**Notes**

Basal association between endogenous  $\beta$ Pix and endogenous 14-3- $\beta$  was increased after forskolin stimulation and significantly inhibited by protein kinase A inhibitor. However, forskolin stimulation failed to increase the interaction between 14-3- $\beta$  and a  $\beta$ <sub>1</sub>Pix mutant that is insensitive to protein kinase A phosphorylation,  $\beta$ <sub>1</sub>Pix(S516A, T526A). (Mutating Ser560 has NO effect on 14-3-3 binding, RKE(S560)AP).

Binding of 14-3- $\beta$  inhibits dimeric  $\beta$ <sub>1</sub>Pix-GEF activity, 14-3- $\beta$  binding may either block the interaction between Rac1 and the DH domain of  $\beta$ <sub>1</sub>Pix or induce a conformational change of the DH domain that would interfere with GTP binding.

The numbering here seems to relate to MOUSE Rho guanine nucleotide exchange factor (GEF) 7 sequence NM\_017402.3:

MTDNTNSQLVVRAKFNFFQQTNEDELSFSKGDV IHVTRVEEGGWEGTHNG RTGWFPSSNYVREIKPSEKPVSPKSGTLKSPKGFDTTAINKSYNNVVLQNIL ETEHEYSKELQSVLSTYLRPLQTSKLSANISYLMGNLEIEISSFQQV LVQSLSEECTKSPEAQQRVGGCFSLMPPQMRITLYLACANHPSAVSVLTHE SEDLGEFMETKGAASSPGILVLTGSLKPFMRDLKYPTLLKELERHMEDYH PDRQDIQKSMTAFKNLSAQCCQEVRRKRELELQILTEPIRSWEGDDIKTLG SVTYMSQVLIQCAGSEEKNERYL LFPNVLLMLSASPRMSGFIYQKLPPT GMTITKLEDSENHRNAFEISGSMIERILVSC TSVSNPTIKPHSVPSHTLPSHPVTPSSKHADSKPAPLTPAYHTLPHPSH HGTPHTTINWGPLEPKTPKPSLSCLRPAAPLRPSAALCYKEDLSKSPK TMKLLPKRKRPERKPSDEEFVAVRKSTAALLEEDAQILKVIEWEYCTSAKTRQ TLNSSSRKESAPQVLLPEEKIIVEETKSNQGTVIEEKS LVDVTVYALKDDE VQELRQDNKMKKSLSEEEQARKDLEKLVKLVKKNMNDPAWDETNI\*

(This version has actually been updated to NM\_001113517.1 GI:165377084 which is longer)

W43K context is VEEGGkWEGT

L238R/L239S context is KYPTsKELERHM

S516A context is PERKPaDEEFVAV

T526A context is AVRKSaAALEED

**References to 14-3-3 binding to ARHGEF7**

Chahdi A, Sorokin A. Protein kinase A-dependent phosphorylation modulates beta1Pix guanine nucleotide exchange factor activity through 14-3-3beta binding. *Mol Cell Biol.* 2008 Mar;28(5):1679-87. Epub 2007 Dec 26

Chahdi A, Miller B, Sorokin A. Endothelin 1 induces beta 1Pix translocation and Cdc42 activation via protein kinase A-dependent pathway. *J Biol Chem.* 2005 Jan 7;280(1):578-84.

Angrand PO, Segura I, Völkel P, Ghidelli S, Terry R, Brajenovic M, Vintersten K, Klein R, Superti-Furga G, Drewes G, Kuster B, Bouwmeester T, Acker-Palmer A. Transgenic mouse proteomics identifies new 14-3-3-associated proteins involved in cytoskeletal rearrangements and cell signaling. *Mol Cell Proteomics.* 2006 Dec;5(12):2211-27.

**Human ATXN-1** Ataxin-1. PolyQ mutant in spinocerebellar ataxia 1. (Swissprot = P54253 )

1 M KSNQERSNE CLPPKKREIP ATSRSSSEKA PTLPSDNHRV EGTAWLPGNP GGRGHGGGRH  
61 GPAGTSVELG LQQGIGLHKA LSTGLDYSPP SAPRSVPVAT TLPAAAYATPQ PGTPVSPVQY  
121 AHLPHTFQFI GSSQYSGTYA SFIPSQLIPP TANPVTSAVA SAAGATTPSQ RSQLEAYSTL  
181 LANMGSLSQT PGHKAQQQQ QQQQQQQHQ HQQQQQQQQQ QQQQQHLSRA PGLITPGSPP  
241 PAQQNQYVHI SSSPQNTGRT ASPPAIPVHL HPHQTMIPHT LTLGPPSQV VQYADSGSHF  
301 VPREATKKAESSRLQQAIAQ KEVLNGEMEK SRRYGAPSSA DLGLGKAGGK SVPHPYESRH  
361 VVVHPSPSDY SSRDPGSVRA SVMVLPNSNT PAADLEVQQA THREASPTL NDKSGLHLGK  
421 PGHRSYALSP HTVIQTTHSA SEPLPVGLPA TAFYAGTQFP VIGYLSGQQQ AITYAGSLPQ  
481 HLVIPGTQPL LIPVGSTDM EASGAAPAVT SSPQFAAVPH TFVTTALPKS ENFNPEALVT  
541 QAAYPAMVQA QIHLVAVQV ASPAAAPPTL PPFYFMKGSII QLANGEKLV EDLKTEDFIQ  
601 SAEISNDLKI DSSTVERIED SHSPGVAVIQ FAVGEHRAQV SVEVLVEYPF FVFGQGWSSC  
661 CPERTSQLFD LPCSKLSVGD VCISLTLKNL KNGSVKKGQP VDPASVLLKH SKADGLAGSR  
721 HRYAEQENGI NQGSQMLSE NGELKFPEKM GLPAAPFLTK IEPSPKAATR KRRW SAPESR  
781 KLEKSEDEPP LTLPKPSLIP QEVKICIEGR SNVGK

>gi|206729854|sp|P54253.2|ATX1\_HUMAN RecName: Full=Ataxin-1; AltName: Full=Spinocerebellar ataxia type 1 protein

M KSNQERSNECLPPKKREIPATSRSSSEKAPTLPDNRVETAWLPGNP GGRGHGGGRHGPAGTSVELG LQQGIGLHKA LSTGLDYSPP SAPRSVPVAT TLPAAAYATPQ PGTPVSPVQY AHLPHTFQFI GSSQYSGTYA SFIPSQLIPP TANPVTSAVA SAAGATTPSQ RSQLEAYSTL LANMGSLSQTPGHKAQQQQQQQQQQHQ HQQQQQQQQQQQQHL SRAPGLITPGSPPAQQNQYVHI SSSPQNTGRTASPPAIPVHL HPHQTMIPHT LTLGPPSQV VQYADSGSHFVPREATKKAESSRLQQAIAQ KEVLNGEMEK SRRYGAPSSADLGLGKAGGK SVPHPYESRHVVVHPSPSDY SSRDPGSVRA SVMVLPNSNT PAADLEVQQA THREASPTL NDKSGLHLGK PGHRSYALSPHTVIQTTHSASEPLPVGLPATAFYAGTQPPVIGYLSGQQQAITYAGSLPQHLVIPGTQPL LIPVGSTDM EASGAAPAVTTFVTTALPKSENFNPEALVTQAAYPAMVQA QIHLVAVQV ASPAAAPPTL PPFYFMKGSII QLANGEKLV EDLKTEDFIQ SAEISNDLKI DSSTVERIED SHSPGVAVIQ FAVGEHRAQV SVEVLVEYPF FVFGQGWSSC PERTSQLFD LPCSKLSVGD VCISLTLKNL KNGSVKKGQP

|                                                                                                                                                                                                                                                                                                                                                                                                                                                                                                                                                                                                                                                                                                                                                                                                                                                                                                                                                                                                                                                                                                                                                                                                                                                                                                                                                                                                                                                                                                                                                                                                                                                                                                                                                                                                                                                                                                                                                                                                                                                                                                                                                                                                                                                                                                                                                                                                                                                                                                                                                                                                                                                                                                                                                                                                                                                                                                                                                                                                                                                                                                                                                                                                                                                                                                                                                                                                                                                                                                                                                                                                                                                                                                                                                                                                                                                                                                                                                                                                                                                                                                                                                                                                                                                                                                                                                                                                                                                                                                                                                                                                                                                                                                                                                                                                                                                                                                                                                                                                                                                                                                                                                                                                                                                                                                                                                                                                                                                                                                                                                                                                       |  |
|-------------------------------------------------------------------------------------------------------------------------------------------------------------------------------------------------------------------------------------------------------------------------------------------------------------------------------------------------------------------------------------------------------------------------------------------------------------------------------------------------------------------------------------------------------------------------------------------------------------------------------------------------------------------------------------------------------------------------------------------------------------------------------------------------------------------------------------------------------------------------------------------------------------------------------------------------------------------------------------------------------------------------------------------------------------------------------------------------------------------------------------------------------------------------------------------------------------------------------------------------------------------------------------------------------------------------------------------------------------------------------------------------------------------------------------------------------------------------------------------------------------------------------------------------------------------------------------------------------------------------------------------------------------------------------------------------------------------------------------------------------------------------------------------------------------------------------------------------------------------------------------------------------------------------------------------------------------------------------------------------------------------------------------------------------------------------------------------------------------------------------------------------------------------------------------------------------------------------------------------------------------------------------------------------------------------------------------------------------------------------------------------------------------------------------------------------------------------------------------------------------------------------------------------------------------------------------------------------------------------------------------------------------------------------------------------------------------------------------------------------------------------------------------------------------------------------------------------------------------------------------------------------------------------------------------------------------------------------------------------------------------------------------------------------------------------------------------------------------------------------------------------------------------------------------------------------------------------------------------------------------------------------------------------------------------------------------------------------------------------------------------------------------------------------------------------------------------------------------------------------------------------------------------------------------------------------------------------------------------------------------------------------------------------------------------------------------------------------------------------------------------------------------------------------------------------------------------------------------------------------------------------------------------------------------------------------------------------------------------------------------------------------------------------------------------------------------------------------------------------------------------------------------------------------------------------------------------------------------------------------------------------------------------------------------------------------------------------------------------------------------------------------------------------------------------------------------------------------------------------------------------------------------------------------------------------------------------------------------------------------------------------------------------------------------------------------------------------------------------------------------------------------------------------------------------------------------------------------------------------------------------------------------------------------------------------------------------------------------------------------------------------------------------------------------------------------------------------------------------------------------------------------------------------------------------------------------------------------------------------------------------------------------------------------------------------------------------------------------------------------------------------------------------------------------------------------------------------------------------------------------------------------------------------------------------------------------------------------------|--|
| <p>VDPASVLLKHSKADGLAGSRHRYAEQENGINQGSQMLSENGELKFFPEKMGLPAAPFLTKIEPSPKAATR<br/>KRRWSAPESRKLEKSEDEPPLTLPKPPLIPQEVKICIEGRSNVVGK</p> <p><b>Notes</b><br/>RRWpS<sup>776</sup>AP (= Ser775 in P54253). Kinase suggested to be PKB/Akt or PKA, but not clear.</p> <p><b>References to 14-3-3 binding to ataxin-1</b><br/>Jorgensen ND, Andresen JM, Lagalwar S, Armstrong B, Stevens S, Byam CE, Duvick LA, Lai S, Jafar-Nejad P, Zoghbi HY, Clark HB, Orr HT. Phosphorylation of ATXN1 at Ser776 in the cerebellum. <i>J Neurochem.</i> 2009 Jul;110(2):675-86.<br/>Umahara T, Uchihara T, Yagishita S, Nakamura A, Tsuchiya K, Iwamoto T. Intracellular immunolocalization of 14-3-3 protein isoforms in brains with spinocerebellar ataxia type 1. <i>Neurosci Lett.</i> 2007 Mar 6;414(2):130-5.<br/>Chen HK, Fernandez-Funex P, Acevedo SF, Lam YC, Kaytor MD, Fernandez MH, Aitken A, Skoulakis EM, Orr HT, Botas J, Zoghbi HY. Interaction of Akt-phosphorylated ataxin-1 with 14-3-3 mediates neurodegeneration in spinocerebellar ataxia type 1. <i>Cell.</i> 2003 May 16;113(4):457-68.<br/>de Chiara C, Menon RP, Strom M, Gibson TJ, Pastore A. Phosphorylation of s776 and 14-3-3 binding modulate ataxin-1 interaction with splicing factors. <i>PLoS One.</i> 2009 Dec 23;4(12):e8372.</p>                                                                                                                                                                                                                                                                                                                                                                                                                                                                                                                                                                                                                                                                                                                                                                                                                                                                                                                                                                                                                                                                                                                                                                                                                                                                                                                                                                                                                                                                                                                                                                                                                                                                                                                                                                                                                                                                                                                                                                                                                                                                                                                                                                                                                                                                                                                                                                                                                                                                                                                                                                                                                                                                                                                                                                                                                                                                                                                                                                                                                                                                                                                                                                                                                                                                                                                                                                                                                                                                                                                                                                                                                                                                                                                                                                                                                                                                                                                                                                                                                                                                                                                                                                                                                                                                                                    |  |
| <p><b>Human BAD</b> (Swissprot = Q92934)</p> <p>1 MFQIPEFEPSE EQEDSSSAER GLGPSPAGDG PSGSGKHHRO APGLLDWASH QEQPTSSSH<br/>61 HGGAGAVEIR SRHSYPAGT EDDEGMGEEP SPFRGRSRSA PPNLWAAQRY GRELRMSDE<br/>121 FVDSFKKGLP RPKSAGTATQ MRQSSSWTRV FQSWWDRNLG RGSSAPSQ</p> <p>&gt;gi 17371773 sp Q92934.3 BAD_HUMAN RecName: Full=Bcl2 antagonist of cell death; Short=BAD; AltName: Full=Bcl-2-binding component 6; AltName: Full=Bcl-2-like protein 8; Short=Bcl2-L-8; AltName: Full=Bcl-XL/Bcl-2-associated death promoter</p> <p>MFQIPEFEPSE EQEDSSSAERGLGPSPAGDG PSGSGKHHRO APGLLDWASH QEQPTSSSH HGGAGAVEIR<br/>SRHSYPAGTEDDEGMGEEP SPFRGRSRSA PPNLWAAQRY GRELRMSDE FVDSFKKGLPRPKSAGTATQ<br/>MRQSSSWTRVFQSWWDRNLGRGSSAPSQ</p> <p><b>Notes</b><br/>Phosphorylated Bad is sequestered in the cytoplasm by 14-3-3 thereby preventing its mitochondrial translocation to induce apoptosis. The 14-3-3-binding sites can be phosphorylated by a number of protein kinases, including PKB and PKA. 14-3-3 binding reduces interactions with Bcl-2 &amp; Bcl-xl. The 14-3-3-binding sites are commonly numbered as Ser112 and Ser136 according to the murine BAD (Swissprot = Q61337), which correspond to Ser75 and Ser99 in the human BAD (Q92934). Murine BAD is longer than human BAD.</p> <p><b>References to 14-3-3 binding to BAD</b><br/>Zha J, Harada H, Yang E, Jockel J, Korsmeyer SJ. Serine phosphorylation of death agonist BAD in response to survival factor results in binding to 14-3-3 not BCL-X(L). <i>Cell.</i> 1996 Nov 15;87(4):619-28.<br/>Polzien L, Baljuls A, Rennefahrt UE, Fischer A, Schmitz W, Zahedi RP, Sickmann A, Metz R, Albert S, Benz R, Hekman M, Rapp UR. Identification of novel in vivo phosphorylation sites of the human pro-apoptotic protein bad: pore-forming activity of bad is regulated by phosphorylation. <i>J Biol Chem.</i> 2009 Aug 10. [Epub ahead of print]<br/>Datta SR, Katsov A, Hu L, Petros A, Fesik SW, Yaffe MB, Greenberg ME. 14-3-3 proteins and survival kinases cooperate to inactivate BAD by BH3 domain phosphorylation. <i>Mol Cell.</i> 2000 Jul;6(1):41-51.<br/>Yang X, Luo C, Cai J, Pierce WM, Tezel G. Phosphorylation-dependent interaction with 14-3-3 in the regulation of bad trafficking in retinal ganglion cells. <i>Invest Ophthalmol Vis Sci.</i> 2008 Jun;49(6):2483-94.<br/>Humphrey RG, Sonnenberg-Hirche C, Smith SD, Hu C, Barton A, Sadovsky Y, Nelson DM. Epidermal growth factor abrogates hypoxia-induced apoptosis in cultured human trophoblasts through phosphorylation of BAD Serine 112. <i>Endocrinology.</i> 2008 May;149(5):2131-7.<br/>Koh PO. Melatonin attenuates the focal cerebral ischemic injury by inhibiting the dissociation of pBad from 14-3-3. <i>J Pineal Res.</i> 2008 Jan;44(1):101-6.<br/>Choi SI, Joo SS, Yoo YM. Melatonin prevents nitric oxide-induced apoptosis by increasing the interaction between 14-3-3beta and p-Bad in SK-N-MC cells. <i>J Pineal Res.</i> 2008 Jan;44(1):95-100.<br/>Wang XT, Pei DS, Xu J, Guan QH, Sun YF, Liu XM, Zhang GY. Opposing effects of Bad phosphorylation at two distinct sites by Akt1 and JNK1/2 on ischemic brain injury. <i>Cell Signal.</i> 2007 Sep;19(9):1844-56.<br/>Dong S, Kang S, Gu TL, Kardar S, Fu H, Lonial S, Khoury HJ, Khuri F, Chen J. 14-3-3 Integrates pro-survival signals mediated by the AKT and MAPK pathways in ZNF198-FGFR1-transformed hematopoietic cells. <i>Blood.</i> 2007 Jul 1;110(1):360-9.<br/>Rapp UR, Fischer A, Rennefahrt UE, Hekman M, Albert S. BAD association with membranes is regulated by Raf kinases and association with 14-3-3 proteins. <i>Adv Enzyme Regul.</i> 2007;47:281-5.<br/>Kamada H, Nito C, Endo H, Chan PH. Bad as a converging signaling molecule between survival PI3-K/Akt and death JNK in neurons after transient focal cerebral ischemia in rats. <i>J Cereb Blood Flow Metab.</i> 2007 Mar;27(3):521-33.<br/>Hekman M, Albert S, Galmiche A, Rennefahrt UE, Fueller J, Fischer A, Puehringer D, Wiese S, Rapp UR. Reversible membrane interaction of BAD requires two C-terminal lipid binding domains in conjunction with 14-3-3 protein binding. <i>J Biol Chem.</i> 2006 Jun 23;281(25):17321-36.<br/>Macdonald A, Campbell DG, Toth R, McLauchlan H, Hastie CJ, Arthur JS. Pim kinases phosphorylate multiple sites on Bad and promote 14-3-3 binding and dissociation from Bcl-XL. <i>BMC Cell Biol.</i> 2006 Jan 10;7:1.<br/>She QB, Solit DB, Ye Q, O'Reilly KE, Lobo J, Rosen N. The BAD protein integrates survival signaling by EGFR/MAPK and PI3K/Akt kinase pathways in PTEN-deficient tumor cells. <i>Cancer Cell.</i> 2005 Oct;8(4):287-97.<br/>Chiang CW, Kaniec C, Kim KW, Fang WB, Parkhurst C, Xie M, Henry T, Yang E. Protein phosphatase 2A dephosphorylation of phosphoserine 112 plays the gatekeeper role for BAD-mediated apoptosis. <i>Mol Cell Biol.</i> 2003 Sep;23(18):6350-62.<br/>Masters SC, Yang H, Datta SR, Greenberg ME, Fu H. 14-3-3 inhibits Bad-induced cell death through interaction with serine-136. <i>Mol Pharmacol.</i> 2001 Dec;60(6):1325-31.<br/>Maslyar DJ, Aoki M, Vogt PK. The growth-promoting activity of the Bad protein in chicken embryo fibroblasts requires binding to protein 14-3-3. <i>Oncogene.</i> 2001 Aug 23;20(37):5087-92.<br/>Yang H, Masters SC, Wang H, Fu H. The proapoptotic protein Bad binds the amphipathic groove of 14-3-3zeta. <i>Biochim Biophys Acta.</i> 2001 Jun 11;1547(2):313-9.<br/>Chiang CW, Harris G, Eilig C, Masters SC, Subramanian R, Shenolikar S, Wadzinski BE, Yang E. Protein</p> |  |



|                                                                                                                                                                                                                                                                                                                                                                                                                                                                                                                                                                                                                                                                                                                                                                                                                                                                                                                                                                                                                                                                                                                                                                                                                                                                                                                                                                                                                                                                                                                                                                                                                                                                                                                                                                                                                                                                                                                                                                                                                                                                                                                                                                                                                                                                                                 |  |
|-------------------------------------------------------------------------------------------------------------------------------------------------------------------------------------------------------------------------------------------------------------------------------------------------------------------------------------------------------------------------------------------------------------------------------------------------------------------------------------------------------------------------------------------------------------------------------------------------------------------------------------------------------------------------------------------------------------------------------------------------------------------------------------------------------------------------------------------------------------------------------------------------------------------------------------------------------------------------------------------------------------------------------------------------------------------------------------------------------------------------------------------------------------------------------------------------------------------------------------------------------------------------------------------------------------------------------------------------------------------------------------------------------------------------------------------------------------------------------------------------------------------------------------------------------------------------------------------------------------------------------------------------------------------------------------------------------------------------------------------------------------------------------------------------------------------------------------------------------------------------------------------------------------------------------------------------------------------------------------------------------------------------------------------------------------------------------------------------------------------------------------------------------------------------------------------------------------------------------------------------------------------------------------------------|--|
| <p>phosphatase 2A activates the proapoptotic function of BAD in interleukin- 3-dependent lymphoid cells by a mechanism requiring 14-3-3 dissociation. <i>Blood</i>. 2001 Mar 1;97(5):1289-97.</p> <p>Lizcano JM, Morrice N, Cohen P. Regulation of BAD by cAMP-dependent protein kinase is mediated via phosphorylation of a novel site, Ser155. <i>Biochem J</i>. 2000 Jul 15;349(Pt 2):547-57.</p> <p>Tan Y, Demeter MR, Ruan H, Comb MJ. BAD Ser-155 phosphorylation regulates BAD/Bcl-XL interaction and cell survival. <i>J Biol Chem</i>. 2000 Aug 18;275(33):25865-9.</p> <p>Fang X, Yu S, Eder A, Mao M, Bast RC Jr, Boyd D, Mills GB. Regulation of BAD phosphorylation at serine 112 by the Ras-mitogen-activated protein kinase pathway. <i>Oncogene</i>. 1999 Nov 18;18(48):6635-40.</p> <p>Tan Y, Ruan H, Demeter MR, Comb MJ. p90(RSK) blocks bad-mediated cell death via a protein kinase C-dependent pathway. <i>J Biol Chem</i>. 1999 Dec 3;274(49):34859-67.</p>                                                                                                                                                                                                                                                                                                                                                                                                                                                                                                                                                                                                                                                                                                                                                                                                                                                                                                                                                                                                                                                                                                                                                                                                                                                                                                              |  |
| <p><b>Human BAIP2 (also known as IRSp53)</b> Brain-specific angiogenesis inhibitor 1-associated protein 2 (Swissprot = Q9UQB8)</p> <p>1 MSLSRSEEMH RLTEENVYKTI MEQFNPSLRN FIAMGKNYEK ALAGVTYAAK GYFDALVKMG<br/> 61 ELASESQGSK ELGDVLFQMA EVHRQIQNQL EEMLKSFHNE LLTQLEQKVE LDSRYLSAAL<br/> 121 KKYQTEQRSK GDALDKCQAE LKLRKKSQ SKNPKQYSDK ELQYIDAISN KQGELENYVS<br/> 181 DGYKTALETE RRRFCFLVEK QCAVAKNSAA YHSGKELLA QKPLWQQAC ADPSKIPERA<br/> 241 VQLMQQVASN GATLPSALSA SKSNLVISDP IPGAKPLPVP PELAPFVGRM SAQESTPIMN<br/> 301 GVTGPDGEDY SPWADRKAAQ PKSLSPQSQ SKLSDSYSN LPVRKSVTPK NSYATTENKt<br/> 361 LPRSSSMAAG LERNRMRVK AIFSHAAGDN STLLSFKEGD LITLLVPEAR DGWHYGESEK<br/> 421 TKMRGWFPFS YTRVLDSDGS DR LHMSLQQG KSSSTGNLLD KDDLAIPPP YGAASRAFP<br/> 481 QTASGFKQRP YSVAVPAFSQ GLDDYGARSM SRNPFQAHVQL KPTVTNDRCD LSAQGPPEGRE<br/> 541 HGDGSARTLA GR</p> <p><b>Notes</b><br/> MRRS(pS87)LLSR, said to be phosphorylated by Akt/PKB, but not conventional Akt/PKB site.</p> <p><b>References to 14-3-3 binding to BAIP2 (IRSp53)</b><br/> Robens JM, Lee YF, Ng E, Hall C, Manser E. Regulation of IRSp53-dependent filopodial dynamics by antagonism between 14-3-3 binding and SH3-mediated localization. <i>Mol Cell Biol</i>. 2009 Nov 23. [Epub ahead of print]</p>                                                                                                                                                                                                                                                                                                                                                                                                                                                                                                                                                                                                                                                                                                                                                                                                                                                                                                                                                                                                                           |  |
| <p><b>Human BCL2L11</b> = Bcl-2-like protein 11 = BimEL =EL isoform of Bim (Swissprot = O43521)</p> <p>1 MAKQPSDVSS ECDREGRQLQ PAERPPQLRP GAPTSLQTEP QGNPEGNHGG EGDSCPHGSP<br/> 61 QGPLAPPASP GPFATRSPLF IFMRRS LLS RSSSGYFSFD TDRSPAPMSC DKSTQTPSP<br/> 121 CQAFNHLYSA MASMRQAEP DMRPEIWIQA ELRRIGDEFN AYYARRVFLN NYQAAEDHPR<br/> 181 MVILRLLRYI VRLVWRMH</p> <p>&gt;gi 18202042 sp O43521.1 B2L11 HUMAN RecName: Full=Bcl-2-like protein 11;<br/> Short=Bcl2-L-11; AltName: Full=Bcl2-interacting mediator of cell death<br/> MAKQPSDVSS ECDREGRQLQ PAERPPQLRP GAPTSLQTEP QGNPEGNHGG EGDSCPHGSP QGPLAPPASP<br/> GPFATRSPLF IFMRRS LLS RSSSGYFSFD TDRSPAPMSC DKSTQTPSP CQAFNHLYS<br/> AMASMRQAEP DMRPEIWIQA ELRRIGDEFN AYYARRVFLN NYQAAEDHPR MVILRLLRYI<br/> VRLVWRMH</p> <p><b>Notes</b><br/> MRRS(pS87)LLSR, said to be phosphorylated by Akt/PKB, but not conventional Akt/PKB site.</p> <p><b>References to 14-3-3 binding to BimEL</b><br/> Qi XJ, Willey GM, Howe PH. Evidence that Ser87 of BimEL is phosphorylated by Akt and regulates BimEL apoptotic function. <i>J Biol Chem</i>. 2006 Jan 13;281(2):813-23.</p>                                                                                                                                                                                                                                                                                                                                                                                                                                                                                                                                                                                                                                                                                                                                                                                                                                                                                                                                                                                                                                                                                                                                                                   |  |
| <p><b>Human BRAf1 (BRAF)</b> (Swissprot = P15056)</p> <p>1 MAALSGGGGG GAEPGQALFN GMEPEAGAG AGAAASSAAD PAIPEEVWNI KQMIKLTQEH<br/> 61 IEALDKDFGG EHNPPSIYLE AYEYTSKLD ALQOREQQLL ESLGNGTDFS VSSASMDTV<br/> 121 TSSSSSSLSV LPSSLSVFQN PTDVARSNPK SPQKPIVRVF LPNKQRTVVP ARCGVTVRDS<br/> 181 LKKALMMRGL IPECCAVYRI QDGEKKPIGW DTDISWLTGE ELHVEVLENV PLTTHNFVRK<br/> 241 TFFTLAFCD FCRKLLFQGFRCQTCGYKFHQ RCSTEVPLMC VNYDQLDLDF VSKFFEHHP<br/> 301 PQEEASLAET ALTSGSSPSA PASDSIGPQI LTSPPSPKSI PIPQPFPPAD EDHRNQFGQ<br/> 361 DRSSAPNVH INTIEPVNID DLIRDQGFRC DGGSTTGLSA TPPASLPGLS TNVKALQKSP<br/> 421 GPQREKSSS SSEDNRMKTLGRDSSDDW EIPDGQITVG QRIGSGSGFT VYKKGWHGDV<br/> 481 AVKMLNVTAP TPQQQLQAFKN EVGVLKTRH VNILLFMGYS TKPQLAIVTQ WCEGSSLYHH<br/> 541 LHIIETKFEM IKLIDIRQT AQGMDYLHAK SIIHRDLKSN NIFLHEDLTV KIGDFGLATV<br/> 601 KSRWSGSHQF EQLSGSILWM APEVIRMQDK NPYSFQSDVY AFGIVLYELM TGQLPYSNIN<br/> 661 NRDQIIFMVG RGYLSPDLK VRSNCPKAMK RLMAECLKKK RDERPLFPQI LASIELLARS<br/> 721 LPKIHRSAE PSLNRAFQTE EDFSLYACAS PKTPIQAGGY GAFFVH</p> <p>&gt;gi 50403720 sp P15056.4 BRAf1_HUMAN RecName: Full=B-Raf proto-oncogene<br/> serine/threonine-protein kinase; AltName: Full=p94; AltName: Full=v-Raf<br/> murine sarcoma viral oncogene homolog B1<br/> MAALSGGGGG GAEPGQALFN GMEPEAGAG AGAAASSAAD PAIPEEVWNI KQMIKLTQEH<br/> IEALDKDFGG EHNPPSIYLE AYEYTSKLD ALQOREQQLL ESLGNGTDFS VSSASMDTV<br/> TSSSSSSLSV LPSSLSVFQN PTDVARSNPK SPQKPIVRVF LPNKQRTVVP ARCGVTVRDS<br/> LKKALMMRGL IPECCAVYRI QDGEKKPIGW DTDISWLTGE ELHVEVLENV PLTTHNFVRK<br/> TFFTLAFCD FCRKLLFQGFRCQTCGYKFHQ RCSTEVPLMC VNYDQLDLDF VSKFFEHHP<br/> PQEEASLAET ALTSGSSPSA PASDSIGPQI LTSPPSPKSI PIPQPFPPAD EDHRNQFGQ<br/> DRSSAPNVH INTIEPVNID DLIRDQGFRC DGGSTTGLSA TPPASLPGLS TNVKALQKSP<br/> GPQREKSSS SSEDNRMKTLGRDSSDDW EIPDGQITVG QRIGSGSGFT VYKKGWHGDV<br/> AVKMLNVTAP TPQQQLQAFKN EVGVLKTRH VNILLFMGYS TKPQLAIVTQ WCEGSSLYHH<br/> LHIIETKFEM IKLIDIRQT AQGMDYLHAK SIIHRDLKSN NIFLHEDLTV KIGDFGLATV<br/> KSRWSGSHQF EQLSGSILWM APEVIRMQDK NPYSFQSDVY AFGIVLYELM TGQLPYSNIN<br/> NRDQIIFMVG RGYLSPDLK VRSNCPKAMK RLMAECLKKK RDERPLFPQI LASIELLARS<br/> LPKIHRSAE PSLNRAFQTE EDFSLYACAS PKTPIQAGGY GAFFVH</p> <p><b>Notes</b><br/> <b>References to 14-3-3-binding to BRAf1</b><br/> See references for ARaf1 and CRAf.</p> |  |
| <p><b>Human Cabin1</b> (Calcineurin-binding protein cabin-1) (Q9Y6J0)</p> <p>1 MIRIAALNAS STIEDDEHGS FKSHTQTKE AQEAEAFALY HKALDLQKHD RFEESAKAYH<br/> 61 ELLEASLLRE AVSSGDEKEG LKHPGLILKY STYKNLAQLA AQREDLETAM EFYLEAVMLD</p>                                                                                                                                                                                                                                                                                                                                                                                                                                                                                                                                                                                                                                                                                                                                                                                                                                                                                                                                                                                                                                                                                                                                                                                                                                                                                                                                                                                                                                                                                                                                                                                                                                                                                                                                                                                                                                                                                                                                                                                                                                                                   |  |

|      |             |             |             |            |             |             |
|------|-------------|-------------|-------------|------------|-------------|-------------|
| 121  | STDVNLWYKI  | GHVALRLIRI  | PLARHAFEFG  | LRCNPDHWPC | LDNLITVLYT  | LSDYTTCLYF  |
| 181  | ICKALEKDCR  | YSKGLVLKEK  | IFEEQPCLRK  | DSLRFMLKCD | MSIHDVSVSA  | AETQAIVDEA  |
| 241  | LGRLRKRQAL  | IVREKEPDLK  | LVQPIPFFTW  | KCLGESLLAM | YNHLTTCPEP  | RPSLGRKIDL  |
| 301  | SDYQDPSQPL  | ESSMVVTPVN  | VIQPSTVSTN  | PAVAVAEVAV | SYTSVATTSF  | PLHSPGPLET  |
| 361  | GAPVGDISGG  | DKSCKGVKRR  | KISEESGETA  | KRRSARVRNT | KCKKEEKVDF  | QELLMKFLPS  |
| 421  | RLRKLDPSEE  | DDSFNNYEVQ  | SEAKLESFSP  | IGPQRLSFDS | ATFMESEKQD  | VHEFLENLNT  |
| 481  | NGGILELMMR  | YLKAMGHKFL  | VRWPPGLAEV  | VLSVYHSWRR | HSTSLPNPLL  | RDCSNKHKID  |
| 541  | MMLMSLSCME  | LQLDQWLLTK  | GRSSAVSPRN  | CPAGMVNGRF | GPDPFGTHCL  | GDLLQLSFAS  |
| 601  | SQRDLFEDGW  | LEFVVRVYWL  | KARFLALQGD  | MEQALenyDI | CTEMLQSSTA  | IQVEAGAERR  |
| 661  | DIVIRLPLNH  | NDSVVSLEEI  | DKNLKSLERC  | QSLLEIQRLY | EAGDYKAVVH  | LLRPTLCTSG  |
| 721  | DRAKHLEFMR  | TSIPERPAQL  | LLLQDSSLRL  | KDYRQCFECS | DVALNEAVQQ  | MVNSGEEAAK  |
| 781  | EEWVATVTQL  | LMGIEQALSA  | DSSGSILKVS  | SSTTGLVRLT | NNLIQVIDCS  | MAVQEEAKEP  |
| 841  | HVSSVLPWII  | LHRIIWQEEED | TFHSLCHQQQ  | LQNPAAEGMS | ETPMLPSSLM  | LLNTAHEYLG  |
| 901  | RRSWCCNSDG  | ALLRFYVVRVL | QKELAASTSE  | DTHPYKEELE | TALEQCFCYCL | YSFSPKSKSA  |
| 961  | RYLEEHSAAQV | VDLIWEDALF  | MFEYFKPKTL  | PEFDSYKTST | VSADLANLLK  | RIATIVPRTE  |
| 1021 | RPALSLDKVS  | AYIEGTSTEV  | PCLPEGADPS  | PPVVNELYYL | LADYHFKNKE  | QSKAIFKFMH  |
| 1081 | DICICPNRFD  | SWAGMALARA  | SRIQDKLNSN  | ELKSDGPIWK | HATPVLNCFR  | RALEIDSSNL  |
| 1141 | SLWIEYGTMS  | YALHSFASRQ  | LKQWRGELPP  | ELVQQMEGRR | DSMLETAKHC  | FTSAARCEGD  |
| 1201 | GDEEELWIHY  | MLGKVAEKQQ  | QPPTVYLLHY  | RQAGHYLHEE | AARYPKKIHY  | HNPPELAMEA  |
| 1261 | LEVYFRLHAS  | ILKLLGKPKDS | GVGAEVLVNF  | MKEAAEGPFA | RGEKNTPKA   | SEKEKACLVD  |
| 1321 | EDSHSSAGTL  | PGPGASLPSS  | SGPGLTSPPY  | TATPIDHDYV | KCKKPHQQAT  | PDDRSQDSTA  |
| 1381 | VALSDSSSTQ  | DFNFNEPTSL  | EGSRKSYTEK  | RLPILSSQAG | ATGKDLQGAT  | EERGKNEESL  |
| 1441 | ESTEGFRAAE  | QGVQKPAEET  | PASACIPGKP  | SASTPTLWDG | KRGDLPGEV   | VAFFPQGLPAG |
| 1501 | AEEOHQFLTE  | QCIIASFRLCL | SFRFPQHYKSL | YRLAFLYTY  | KTHRNQWAR   | DVLLGSSIPW  |
| 1561 | QQLQHMPAQG  | LCERNKTNF   | FNGIWRIPVD  | EIDRPGSFAW | HMNRSLVLL   | KVLAQLRDHS  |
| 1621 | TLLKVSSMLQ  | RTPDQGGKYL  | RDADRQVLAQ  | RAFILTQVVL | EDTLSELAEG  | SERPGPKVCG  |
| 1681 | LPGARMTTDD  | SHKASPEDGQ  | EGLPQPKKPP  | LADGSGPGPE | PGGKVGLLNP  | RPVAMDAGDS  |
| 1741 | ADQSGERKDK  | ESPRAGPTEP  | MDTSEATVCH  | SDLERTPLL  | PGRPARDRGP  | ESRPTLSLE   |
| 1801 | ELSIARQQP   | TPLTPAQFAP  | APAPATTTGT  | RAGGHPEEFL | SRLSRKRLK   | EDTESGKTL   |
| 1861 | LDAYRVWQQG  | QKGVAYDLGR  | VERIMSETYM  | LIKQVDEEAA | LEQAVKFCQV  | HLGAAARQRA  |
| 1921 | SGDPTTPPKH  | PKDSRENFFP  | VTVVPTAPDP  | VPADSVQRPS | DAHTKPRPAL  | AAATTITPC   |
| 1981 | PSASASTLDQ  | SKDPGPPRPH  | REPEATPSMAS | LGPEGEELAR | VAEGTSFPPQ  | EPRHSPQVKM  |
| 2041 | APTSSPAEPH  | CWPAEALGT   | GAEPTCSQEG  | KLRPEPRRDG | EAQEAASETQ  | PLSSPPTAAS  |
| 2101 | SKAPSSGSAQ  | PPEGHGPKPE  | PSRAKSRPLP  | NMPKLVIPSA | ATKFPPEITV  | TPPTPTLLSP  |
| 2161 | KGSISEETKQ  | KLKSAILSQA  | SAANVRKESL  | CQPALEVLET | SSQESSLESE  | TDEDDYMDI   |

>gi|6685261|sp|Q9Y6J0.1|CABIN\_HUMAN RecName: Full=Calcineurin-binding protein cabin-1; AltName: Full=Calcineurin inhibitor; Short=CAIN

MIRIAALNASSTIEDDHEGSFKSHKTQTKEAQEAFAFYHKAALDQKHDRFEESAKAYHELLEASLLRE  
AVSSGDEKEGLKHPGLILKYSTYKNAQLAAQREDLETAMEFYLEAVMLDSTDVNLWYKIGHVALRLIRI  
PLARHAFEGLRNCNPDHWPCLDNLITVLYTSLDYTTCLYFICKALEKDCRYSGKGLVLEKEIFEEQPCLRK  
DSLRFMLKCDMSIHDVSVSAAETQAIVDEALGLRKRQALIVREKEPDLKLVQPIPFFTWKCLGESLLAM  
YNHLTTCPEPRPSLGGKRIIDLSYQDPSQPLESSMVVTPVNVIQPSTVSTNPAVAVAEVAVSYTSVATTSF  
PLHSPGPLETGAPVGDISGGDKSKKGVKRRKISEESGETAKRRSARVRNTKCKKEEKVDFQELLMKFLPS  
RLRKLDPSEEDDSFNNYEVQSEAKLESFSPIGPQRLSFDSATFMESEKQDVHEFLENLNTGGIILELMMR  
YLKAMGHKFLVRWPPGLAEVVLVSVYHSWRRHSTSLPNPLLDRCSNKHIDMMLMSLSCMELQLDQWLLTK  
GRSSAVSPRNCAPAGMVNGRFGPDFGTHCLGDLLQLSFASSQRDLFEDGWLEFVVRVYWLKARFLALQGD  
MEQALenyDICTEMLQSSTAIQVEAGAERRDIVIRLPLNHNSVVSLEEIDKNLKSLERCQSLLEIQRLY  
EAGDYKAVVHLLRPTLCTSGFDRAKHLEFMTSIPERPAQLLLLQDSSLRLKDYRQCFECS DVALNEAVQQ  
MVNSGEEAAKEEWVATVTQLLMGIEQALSADSSGSILKVSSTTGLVRLTNNLIQVIDCSMAVQEEAKEP  
HVSSVLPWII LHRIIWQEEEDTFHSLCHQQQLQNPAAEGMSETPMLPSSMLLNTAHEYLGRRSWCCNSDG  
ALLRFYVVRVLQKELAASTSEDTHPYKEELETALEQCFCYCLYSFSPKSKKARYLEEHSAAQVVDLIWEDALF  
MFEYFKPKTLPEFDSYKTSTVSADLANLLKRIATIVPRTERPALSLDKVSAIIEGTSTEVPCLEPGADPS  
PPVVNELYYLLADYHFKNKEQSKAIFKFMHDIICICPNRFD SWAGMALARASRIQDKLNSNELKSDGPIWK  
HATPVLNCFRRALEIDSSNL SLWIEYGTMSYALHSFASRQLKQWRGELPPELVQQMEGRRDSMLETAKHC  
FTSAARCEGDGDEEELWIHYMLGKVAEKQQQPPTVYLLHYRQAGHYLHEEAAARYPKKIHYHNPPELAMEA  
LEVYFRLHASILKLLGKPKDSGVAEVLVNFMEKAAEGPFAERGEKNTPKASEKEKACLVDSDSHSAGTL  
PGPGASLPSSSGPGLTSPPYTATPIDHDYVKCKKPHQQATPDDRSQDSTAVALSDDSSSTQDFNEPTSL  
EGSRKSYTEKRLPILSSQAGATGKDLQGATEERGKNEESLESTEGFRAAEQGVQKPAEETPASACIPGKP  
SASTPTLWDGKRGDLPGEVVAFFPQGLPAGAEQRQFLTEQCIIASFRLCLSRFPQHYKSLYRLAFLYTY  
KTHRNQWARDVLLGSSIPWQQLQHMPAQGLFCERNKTNFNGIWRIPVDEIDRPGSFAWHMNRSLVLL  
KVLAQLRDHSTLLKVSSMLQRTPDQGGKYL RDADRQVLAQRAFILTQVVL EDTLSELAEGSERPGPKVCG  
LPGARMTTDDVSHKASPEDGQEGLPQPKKPLADGSGPGPEPGGKVGLLNP RPVAMDAGDSADQSGERKDK  
ESPRAGPTEPMDTSEATVCHSDLERTPLL PGRPARDRGPESRPTLSLEELSIARQQPTPLTPAQFAP  
APAPATTTGTTRAGGHPEEFLSRLSRKRLLEDTESGKTLLLDAYRVWQQGKGVAYDLGRVERIMSETYM  
LIKQVDEEAALEQAVKFCQVHLGAAARQASGDTPTTPKHPKDSRENFFPVTVVPTAPDPVPADSVQRPS  
DAHTKPRPALAAATTITPCPSASASTLDQSKDPGPPRPHREPEATPSMASLGPEGEELARVAEGTSFPPQ  
EPRHSPQVKMAPTSSPAEPHCWPAEALGTGAEPTCSQEGKLRPEPRRDGEAQEAASETQPLSSPPTAAS  
SKAPSSGSAQPEGHGPKPEPSRAKSRPLNMPKLVIPSAATKFPPEITVTPPTPTLLSPKGSISEETKQ  
KLKSAILSQA SAANVRKESL CQPALEVLETSSQESSLESE TDEDDYMDI

**Notes**  
(RAKpS<sup>2126</sup>RP) Cabin1 is a transcriptional corepressor for myocyte enhancer factor 2

**References to 14-3-3 binding to Cabin1**  
Pan F, Means AR, Liu JO. Calmodulin-dependent protein kinase IV regulates nuclear export of Cabin1 during T-cell activation. EMBO J. 2005 Jun 15;24(12):2104-13.  
Choi SJ, Park SY, Han TH. 14-3-3tau associates with and activates the MEF2D transcription factor during muscle cell differentiation. Nucleic Acids Res. 2001 Jul 1;29(13):2836-42.

|                                                                                                                                                                                                                                                                                                                                                                                                                                                                                                                                                                                                                                                                                                                                                                                                                                                                                                                                                                                                                                                                                                                                                                                                                                                                                                                                                                                                                                                                                                                                                                                                                                                                                                                                                                                                                                                                                                                                                                                                                                                                                                                                                                                                                                                                                                                                                                                                                                                                                                                                                                                                                                                                                                                                                                                                                                                                                                                                                                                                                                                                                                                                                                                                                                                                                                                                                                                                                                                                                                                                                                                                                                                                                                                                                                                                                                                                                                                                                                                                                                                                                                                                                                                                                                                                                                                                                                                                                                                                                                                                                                                                                                                                                                                                                                                                                                                                                                                                                                                                                                                                                                                                                                                                                                                                                                                                                                                                                                                                                                                                                                                                                               |                                                                       |
|-------------------------------------------------------------------------------------------------------------------------------------------------------------------------------------------------------------------------------------------------------------------------------------------------------------------------------------------------------------------------------------------------------------------------------------------------------------------------------------------------------------------------------------------------------------------------------------------------------------------------------------------------------------------------------------------------------------------------------------------------------------------------------------------------------------------------------------------------------------------------------------------------------------------------------------------------------------------------------------------------------------------------------------------------------------------------------------------------------------------------------------------------------------------------------------------------------------------------------------------------------------------------------------------------------------------------------------------------------------------------------------------------------------------------------------------------------------------------------------------------------------------------------------------------------------------------------------------------------------------------------------------------------------------------------------------------------------------------------------------------------------------------------------------------------------------------------------------------------------------------------------------------------------------------------------------------------------------------------------------------------------------------------------------------------------------------------------------------------------------------------------------------------------------------------------------------------------------------------------------------------------------------------------------------------------------------------------------------------------------------------------------------------------------------------------------------------------------------------------------------------------------------------------------------------------------------------------------------------------------------------------------------------------------------------------------------------------------------------------------------------------------------------------------------------------------------------------------------------------------------------------------------------------------------------------------------------------------------------------------------------------------------------------------------------------------------------------------------------------------------------------------------------------------------------------------------------------------------------------------------------------------------------------------------------------------------------------------------------------------------------------------------------------------------------------------------------------------------------------------------------------------------------------------------------------------------------------------------------------------------------------------------------------------------------------------------------------------------------------------------------------------------------------------------------------------------------------------------------------------------------------------------------------------------------------------------------------------------------------------------------------------------------------------------------------------------------------------------------------------------------------------------------------------------------------------------------------------------------------------------------------------------------------------------------------------------------------------------------------------------------------------------------------------------------------------------------------------------------------------------------------------------------------------------------------------------------------------------------------------------------------------------------------------------------------------------------------------------------------------------------------------------------------------------------------------------------------------------------------------------------------------------------------------------------------------------------------------------------------------------------------------------------------------------------------------------------------------------------------------------------------------------------------------------------------------------------------------------------------------------------------------------------------------------------------------------------------------------------------------------------------------------------------------------------------------------------------------------------------------------------------------------------------------------------------------------------------------------------------------------------|-----------------------------------------------------------------------|
| <p><b>Human Cbl</b> E3 ubiquitin-protein ligase CBL (swissprot = P22681)</p> <pre> 1 MAGNVKSSG AGGGSGSGGS GSGGLGLMK DAFQPHHHH HHLSPHPGT VDKKMEKCV 61 KLMDKVVRLC QNPKLALKNS PPYILDLLPD TYQHLRTILS RYEGKMETLG ENEYFRVFME 121 NLMKTKQTI SLFKEGKERM YEENSQPRRN LTKLSLIFSH MLAELKGFIP SGLFQGDFTFR 181 ITKADAAEFW RKAFGEKTIV PWKSFRQALH EVHPISSGLE AMALKSTIDL TCNDYISVFE 241 FDI FTRLFQFP WSSLRNWNS LAVTHPGYMA FLYTDEVKAR LQKFIHKPGS YIFRLSCTRL 301 QQWAIQYVTA DGNILQTI PH NKPLFQALID GFREGFYLF DGRNQNPDLT GLCEPTQDH 361 IKVTQEQYEL YCEMGSTFQL CKICAENDKD VKIEPCGHLM CTSCLTWQSE SEGQGCPCFR 421 CEIKGTEPIV VDPFDPGSG SLLRQGAEGA PSPNYDDDD ERADDTLFMM KELAGAKVER 481 PPSPFMAPQ ASLPPVPPRL DLLPQRVCVP SSASALGTAS KAASGSLHKD KPLPVPPTLR 541 DLPPPPPPDR PYSVGAESRP QRRPLPCTPG DCPSRDKLLP VPSSRLGDSW LRPPIKVPV 601 SAPSSDPWT GRELTNRHSL PFLPSQMEP RPDVPRLGST FSLDTSMSMN SSPLVGPECD 661 HPKIKPSSSA NAIYSLAARP LPVPKLPGE QCEGEEDTEY MTPSSRPLRP LDTSQSSRAC 721 DCDQIDISCT YEAMYNIQSQ APSITESSTF GEGNLAHAHA NTGPEESENE DDGYDVPKPP 781 VPAVLARRTL SDISNASSSF GWLSLDGDPT TNVTEGSQVP ERPPKPFPRR INSERKAGSC 841 QQSGPAASA ATASPOLSSE IENLMSQGY S YQDIQKALVI AQNNIEMAKN ILREFVSISS 901 PAHVAT </pre> <p>&gt;gi 251757253 sp P22681.2 CBL_HUMAN RecName: Full=E3 ubiquitin-protein ligase CBL; AltName: Full=Signal transduction protein CBL; AltName: Full=Proto-oncogene c-CBL; AltName: Full=Casitas B-lineage lymphoma proto-oncogene; AltName: Full=RING finger protein 55</p> <p>MAGNVKSSGAGGGSGSGGS GSGGLGLMKDAFQPHHHHHHLSHPHPGTVDKMKMEKCVKLMMDKVVRLC QNPKLALKNSPPYILDLLPD TYQHLRTILSR YEGKMETLGENEYFRVFMENL M K K T Q T I S L F K E G K E R M Y E E N S Q P R R N L T K L S L I F S H M L A E L K G I F P S G L F Q G D F T F R I T K A D A A E F W R K A F G E K T I V P W K S F R Q A L H E V H P I S S G L E A M A L K S T I D L T C N D Y I S V F E F D I F T R L F Q P W S S L L R N W N S L A V T H P G Y M A F L Y T D E V K A R L Q K F I H K P G S Y I F R L S C T R L G Q W A I Q Y V T A D G N I L Q T I P H N K P L F Q A L I D G F R E G F Y L F P D G R N Q N P D L T G L C E P T P Q D H I K V T Q E Q Y E L Y C E M G S T F Q L C K I C A E N D K D V K I E P C G H L M C T S C L T W Q E S E G Q G C P C F R C E I K G T E P I V V D P F D P G S G S L L R Q G A E G A P S P N Y D D D D E R A D D T L F M M K E L A G A K V E R P P S P F M A P Q A S L P P V P P R L D L L P Q R V C V P S S A S A L G T A S K A A S G S L H K D K P L P V P P T L R D L P P P P P D R P Y S V G A E S R P Q R R P L P C T P G D C P S R D K L P V P S S R L G D S W L P R P I P K V P V S A P S S D P W T G R E L T N R H S L P F L P S Q M E P R P D V P R L G S T F S L D T S M S M N S S P L V G P E C D H P K I K P S S A N A I Y S L A A R P L P V P K L P P G E Q C E G E E D T E Y M T P S S R P L R P L D T S Q S S R A C D Q I D S C T Y E A M Y N I Q S Q A P S I T E S S T F G E G N L A A H A H A N T G P E E S E N E D D G Y D V P K P P V P A V L A R R T L S D I S N A S S S F G W L S L D G D P T T N V T E G S Q V P E R P P K P F P R R I N S E R K A G S C Q Q S G P A A S A A T A S P O L S S E I E N L M S Q G Y S Y Q D I Q K A L V I A Q N N I E M A K N I L R E F V S I S S P A H V A T</p> <p><b>Notes</b><br/>Mutation of Cbl serine residues 619, 623, 639, and 642 abolished the interaction between Cbl and 14-3-3 (Pedraza-Alva et al 2001). RH(pS619)LPF(pS623), RLG(pS639)TF(pS642), most likely NRH(S619)LP and RLG(pS639)TF, but not certain?</p> <p><b>References to 14-3-3 binding to Cbl</b><br/>Liu YC, Elly C, Yoshida H, Bonnefoy-Berard N, Altman A. Activation-modulated association of 14-3-3 proteins with Cbl in T cells. <i>J Biol Chem.</i> 1996 Jun 14;271(24):14591-5.<br/>Melander F, Andersson T, Dib K. Engagement of beta2 integrins recruits 14-3-3 proteins to c-Cbl in human neutrophils. <i>Biochem Biophys Res Commun.</i> 2004 May 14;317(4):1000-5.<br/>Subramanian RR, Masters SC, Zhang H, Fu H. Functional conservation of 14-3-3 isoforms in inhibiting bad-induced apoptosis. <i>Exp Cell Res.</i> 2001 Nov 15;271(1):142-51.<br/>Chernock RD, Cherla RP, Ganju RK. SHP2 and cbl participate in alpha-chemokine receptor CXCR4-mediated signaling pathways. <i>Blood.</i> 2001 Feb 1;97(3):608-15.<br/>Pedraza-Alva G, Sawasdikosol S, Liu YC, Mérida LB, Cruz-Muñoz ME, Ocegüera-Yañez F, Burakoff SJ, Rosenstein Y. Regulation of Cbl molecular interactions by the co-receptor molecule CD43 in human T cells. <i>J Biol Chem.</i> 2001 Jan 5;276(1):729-37.<br/>Liu Y, Liu YC, Meller N, Giampa L, Elly C, Doyle M, Altman A. Protein kinase C activation inhibits tyrosine phosphorylation of Cbl and its recruitment of Src homology 2 domain-containing proteins. <i>J Immunol.</i> 1999 Jun 15;162(12):7095-101.<br/>Liu YC, Altman A. Cbl: complex formation and functional implications. <i>Cell Signal.</i> 1998 Jun;10(6):377-85.<br/>Wang H, Zhang L, Liddington R, Fu H. Mutations in the hydrophobic surface of an amphipathic groove of 14-3-3zeta disrupt its interaction with Raf-1 kinase. <i>J Biol Chem.</i> 1998 Jun 26;273(26):16297-304.<br/>Robertson H, Langdon WY, Thien CB, Bowtell DD. A c-Cbl yeast two hybrid screen reveals interactions with 14-3-3 isoforms and cytoskeletal components. <i>Biochem Biophys Res Commun.</i> 1997 Nov 7;240(1):46-50.<br/>Liu YC, Liu Y, Elly C, Yoshida H, Lipkowitz S, Altman A. Serine phosphorylation of Cbl induced by phorbol ester enhances its association with 14-3-3 proteins in T cells via a novel serine-rich 14-3-3-binding motif. <i>J Biol Chem.</i> 1997 Apr 11;272(15):9979-85.</p> | <p>SITES NOT DEFINED PRECISELY, NOT INCLUDED IN WEBLOGO ANALYSIS.</p> |
| <p><b>Human CBY1</b> Chibby = antagonist of <math>\beta</math>-catenin (ARPP-binding protein) (Swissprot = Q9Y3M2)</p> <pre> 1 MPFFGNTFSP KKT PPRKSA LSNLHSLDRS TREVELGLE Y GSPTMNLAGQ SLKFENGQWI 61 AETGVSGGVD RREVQRLRRR NQQL EENNLLRLKVDILLD MLSESTAESH LMEKELDEL 121 ISRKRK </pre> <p>&gt;gi 20454882 sp Q9Y3M2.1 CBY1_HUMAN RecName: Full=Protein chibby homolog 1; AltName: Full=PKD2 interactor, Golgi and endoplasmic reticulum-associated 1; AltName: Full=PIGEA-14; AltName: Full=Cytosolic leucine-rich protein; AltName: Full=ARPP-binding protein</p> <p>MPFFGNTFSPKKT PPRKSA LSNLHSLDRS TREVELGLE Y GSPTMNLAGQ SLKFENGQWIAETGVSGGVD RREVQRLRRR NQQL EENNLLRLKVDILLD MLSESTAESH LMEKELDEL R I S R K R K</p> <p><b>Notes</b><br/>Cby is a 14.5kDa protein evolutionarily conserved from fly to human. Cby possibly acts in concert with 14-3-3 proteins to facilitate nuclear export of beta-catenin, thereby antagonizing beta-catenin signaling. Said to be phosphorylated by AKT/PKB, but not a conventional site for this kinase.<br/>"14-3-3 proteins specifically recognize serine 20 (RKSASLS) within the 14-3-3-binding motif of Cby when</p>                                                                                                                                                                                                                                                                                                                                                                                                                                                                                                                                                                                                                                                                                                                                                                                                                                                                                                                                                                                                                                                                                                                                                                                                                                                                                                                                                                                                                                                                                                                                                                                                                                                                                                                                                                                                                                                                                                                                                                                                                                                                                                                                                                                                                                                                                                                                                                                                                                                                                                                                                                                                                                                                                                                                                                                                                                                                                                                                                                                                                                                                                                                                                                                                                                                                                                                                                                                                                                                                                                                                                                                                                                                                                                                                                                                                                                                                                                                                                                                                                                                                                                                                                                                                                                                                                                                                                                                                                                                             |                                                                       |

|                                                                                                                                                                                                                                                                                                                                                                                                                                                                                                                                                                                                                                                                                                                                                                                                                                                                                                                                                                                                                                                                                                                                                                                                                                                                                                                                                                                                                                                                                                                                                                                                                                                                                                                                                                                                                                                                                                                                                                                                                                                                                                                                                                                                                                                                                                                                                                                                                                                                                                       |  |
|-------------------------------------------------------------------------------------------------------------------------------------------------------------------------------------------------------------------------------------------------------------------------------------------------------------------------------------------------------------------------------------------------------------------------------------------------------------------------------------------------------------------------------------------------------------------------------------------------------------------------------------------------------------------------------------------------------------------------------------------------------------------------------------------------------------------------------------------------------------------------------------------------------------------------------------------------------------------------------------------------------------------------------------------------------------------------------------------------------------------------------------------------------------------------------------------------------------------------------------------------------------------------------------------------------------------------------------------------------------------------------------------------------------------------------------------------------------------------------------------------------------------------------------------------------------------------------------------------------------------------------------------------------------------------------------------------------------------------------------------------------------------------------------------------------------------------------------------------------------------------------------------------------------------------------------------------------------------------------------------------------------------------------------------------------------------------------------------------------------------------------------------------------------------------------------------------------------------------------------------------------------------------------------------------------------------------------------------------------------------------------------------------------------------------------------------------------------------------------------------------------|--|
| <p>phosphorylated by Akt kinase. Notably, 14-3-3 binding results in sequestration of Cby into the cytoplasm. Feng-Qian et al 2008)"</p> <p><b>References to 14-3-3 binding to Chibby</b><br/> Takemaru K, Fischer V, Li FQ. Fine-tuning of nuclear-catenin by Chibby and 14-3-3. <i>Cell Cycle</i>. 2009 Jan 15;8(2):210-3.<br/> Feng-Qian Li, Adaobi Mofunanya, Kimberley Harris, and Ken-Ichi Takemaru. Chibby cooperates with 14-3-3 to regulate <math>\beta</math>-catenin subcellular distribution and signaling activity. <i>J Cell Biol</i>. 2008 June 30; 181(7): 1141–1154.<br/> Li FQ, Mofunanya A, Fischer V, Hall J, Takemaru KI. Nuclear-Cytoplasmic Shuttling of Chibby Controls <math>\beta</math>-Catenin Signaling. <i>Mol Biol Cell</i>. 2009 Nov 25. [Epub ahead of print]</p>                                                                                                                                                                                                                                                                                                                                                                                                                                                                                                                                                                                                                                                                                                                                                                                                                                                                                                                                                                                                                                                                                                                                                                                                                                                                                                                                                                                                                                                                                                                                                                                                                                                                                                     |  |
| <p><b>Human CD74</b> Major histocompatibility complex, class II invariant chain (Swissprot = P04233-1 for canonical long isoform)</p> <pre> 1 MHRRRSR<sup>S</sup>CR EDQKPVMDQ RDLISNNEQL PMLGRRPGAP ESKCSR<sup>G</sup>GALY TGFSILV<sup>T</sup>LL 61 LAGQATTAYF LYQQQGR<sup>L</sup>LDK LTVTSQNLQL ENLRMKLPK PKPVSKMRMA TPLLMQALPM 121 GALPQQPMQN ATKYGNMTE<sup>D</sup> HVMHLLQ<sup>N</sup>AD PLKVYPP<sup>L</sup>KG SFPENLRHLK NTMETID<sup>K</sup>WV 181 FESWMHHWLL FEMSRHSLE<sup>Q</sup> KPTDAPPKES LELED<sup>P</sup>SSGL GVTKQDL<sup>G</sup>FPV PM </pre> <p><b>Notes</b><br/> MHRRRSR(pS8)CREDQKPV in the N-terminal cytoplasmic tail</p> <p><b>References to 14-3-3 binding to CD74 (also known as Iip35)</b><br/> Kuwana T, Peterson PA, Karlsson L. Exit of major histocompatibility complex class II-invariant chain p35 complexes from the endoplasmic reticulum is modulated by phosphorylation. <i>Proc Natl Acad Sci U S A</i>. 1998 Feb 3;95(3):1056-61.<br/> O'Kelly I, Butler MH, Zilberberg N, Goldstein SA. Forward transport. 14-3-3 binding overcomes retention in endoplasmic reticulum by dibasic signals. <i>Cell</i>. 2002 Nov 15;111(4):577-88.<br/> Anderson HA, Bergstralh DT, Kawamura T, Blauvelt A, Roche PA. Phosphorylation of the invariant chain by protein kinase C regulates MHC class II trafficking to antigen-processing compartments. <i>J Immunol</i>. 1999 Nov 15;163(10):5435-43.<br/> Faul C, S. Huttelmaier, J. Oh, V. Hachet, R. H. Singer, and P. Mundel. 2005. Promotion of importin <math>\{\alpha\}</math>-mediated nuclear import by the phosphorylation-dependent binding of cargo protein to 14-3-3. <i>J. Cell Biol</i>. 169:415-424</p>                                                                                                                                                                                                                                                                                                                                                                                                                                                                                                                                                                                                                                                                                                                                                                                                            |  |
| <p><b>Human Cdc25A</b> M-phase inducer phosphatase 1 (Swissprot = P30304)</p> <pre> 1 MELGPEPPHR RLLFACSP<sup>P</sup> PASQPVVKAL FGASAAGGLS PVTNLTVTMD QLQGLGSDYE 61 QPLEVKNNNS LQRMGSSE<sup>S</sup>T DSGFCLDSPG PLDSKENLEN PMRRIHSLPQ KLLGCSPALK 121 RSHSDSLDHD IFQLIDPDEN KENEA<sup>F</sup>E<sup>F</sup>FK PVRPVS<sup>R</sup>GCL HSHGLQEGK<sup>D</sup> LFTQRQ<sup>N</sup>SAP 181 ARMLSSNERD SSEPGNFI<sup>P</sup>L FTPQSPV<sup>T</sup>AT LSEDDG<sup>F</sup>VD LDGENL<sup>K</sup>NE EETPSC<sup>M</sup>ASL 241 WTAPLVMRTT NLDNRCKL<sup>F</sup>D SPSLCS<sup>S</sup>STR SVLKR<sup>P</sup>ERSQ EESPPG<sup>S</sup>TKR RKSMSG<sup>A</sup>SPK 301 ESTNPEKAHE TLHQSL<sup>S</sup>LAS SPKGTI<sup>E</sup>NIL DNDPRD<sup>L</sup>IGD FSKGYL<sup>F</sup>HTV AGKHQD<sup>L</sup>KYI 361 SPEIMASVLN GKFNLI<sup>K</sup>E<sup>F</sup>V IIDCRYP<sup>Y</sup>E YEGGH<sup>I</sup>KGAV NLHMEEE<sup>V</sup>ED FLLKKP<sup>I</sup>VPT 421 DGKRVIVV<sup>F</sup>H CEFSSER<sup>G</sup>PR MCRYVR<sup>R</sup>DR LGNEYPK<sup>L</sup>HY PELYVL<sup>K</sup>GGY KEFFMK<sup>C</sup>QSY 481 CEPPSYR<sup>P</sup>MH HEDFKED<sup>L</sup>LK FRTKSR<sup>T</sup>WAG EKSKRE<sup>M</sup>YSR LKKL </pre> <p>&gt;gi 50403734 sp P30304.2 MPIP1_HUMAN RecName: Full=M-phase inducer phosphatase 1; AltName: Full=Dual specificity phosphatase Cdc25A</p> <p>MELGPEPPHRRLLFACSPPPASQPVVKALFGASAAGGLSPVTNLTVTMDQLQGLGSDYEQPLEVKNNNS LQRMGSSESTDSGFCLDSPGPLDSKENLENPMRRIHSLPQKLLGCSPALKRSHSDSLDHDIFQLIDPDEN KENEAFFFKKPVSRGCLHSHGLQEGKDLFTQRQNSAPARMLSSNERDSSEPGNFIPLFTPQSPVAT LSEDDGFVDLLDGENLKNEEETPSCMASLWTAPLVMRTTNLDNRCKLFDSPSLCSSTRSVLKRERSQ EESPPGSTRKRKSMGASPKESTNPEKAHETLHQSLSLASSPKGTIENILDNDPRDLIGDFSKGYLFHTV AGKHQDLKYISPEIMASVLNGKFNLIKEFVIIDCRYPYEEYEGGHKGAIVNLHMEEEVEDFLLKKPIVPT DGKRVIVVFHCEFSSERGPRMCRYVRERDRLGNEYPKLHYPELYVLKGGYKEFFMKCQSYCEPPSYRPMH HEDFKEDLKFRTKSRTWAGEKSKREMYSRLLKKL</p> <p><b>Notes</b><br/> Phosphorylated Ser177-Cdc25A that is specific for 14.3.3 binding</p> <p><b>References to 14-3-3 binding to Cdc25A</b><br/> Madlener S, Rosner M, Krieger S, Giessrigl B, Gridling M, Vo TP, Leisser C, Lackner A, Raab I, Grusch M, Hengstschläger M, Dolznig H, Krupitza G. Short 42 degrees C heat shock induces phosphorylation and degradation of Cdc25A which depends on p38MAPK, Chk2 and 14.3.3. <i>Hum Mol Genet</i>. 2009 Jun 1;18(11):1990-2000.<br/> Conklin DS, Galaktionov K, Beach D. 14-3-3 proteins associate with cdc25 phosphatases. <i>Proc Natl Acad Sci U S A</i>. 1995 Aug 15;92(17):7892-6.</p> |  |
| <p><b>Human Cdc25B</b> M-phase inducer phosphatase 2 (Swissprot = P30305)</p> <pre> 1 MEVPQPEPAP GSALSPAG<sup>V</sup>C GGAQRPGH<sup>L</sup>P GLLLGSHGLL GSPVRAA<sup>A</sup>SS PVTTLTQ<sup>T</sup>TMH 61 DLAGLGSE<sup>T</sup>P KSQVGTLL<sup>F</sup>R SRSRLTH<sup>L</sup>SL SRRASE<sup>S</sup>SL SSSSSSDAG LCMDS<sup>P</sup>SPMD 121 PHMAEQTFE<sup>Q</sup> AIQAASRI<sup>I</sup>R NEQFAIR<sup>R</sup>FQ SMPVRL<sup>L</sup>GHS PVLRNIT<sup>N</sup>SQ APDGR<sup>R</sup>KSEA 181 GSGAASS<sup>S</sup>GE DKENDGFV<sup>F</sup>K MPWKPTH<sup>P</sup>SS THALAEW<sup>A</sup>SR REAFAQR<sup>P</sup>SS APDLM<sup>C</sup>LSPD 241 RKMEVEEL<sup>S</sup>P LALGRFSL<sup>T</sup>P AEGDTEED<sup>D</sup>G FVDILES<sup>D</sup>LK DDAVPPG<sup>M</sup>E SLISAPL<sup>V</sup>KT 301 LEKEEEKD<sup>L</sup>V MYSKQR<sup>L</sup>FR SP<sup>S</sup>MPCSVIR PILKRLER<sup>F</sup>Q DRDTPVQ<sup>N</sup>KR RRSVTPPE<sup>E</sup>Q 361 QEAEEPKAR<sup>V</sup> LRSKSLCH<sup>D</sup>E IENLLDS<sup>H</sup>R ELIGDYS<sup>K</sup>AF LLQTVDG<sup>K</sup>HQ DLKYISP<sup>E</sup>TM 421 VALLTGK<sup>F</sup>SN IVDKFVIV<sup>D</sup>C RYPYEEY<sup>E</sup>GH IKTAVN<sup>L</sup>PLE RDAESFL<sup>L</sup>KS PIAPCSL<sup>D</sup>KR 481 VILIFHCE<sup>F</sup>S SERGPRM<sup>C</sup>RF IRERDRA<sup>V</sup>ND YPSLYPE<sup>M</sup>Y ILKGGYKE<sup>F</sup>F PQHPN<sup>F</sup>CEPQ 541 DYLRPMN<sup>H</sup>EAF KDELKTF<sup>R</sup>LK TRSWAGER<sup>S</sup>R RELCSRL<sup>Q</sup>DQ </pre> <p>&gt;gi 21264471 sp P30305.2 MPIP2_HUMAN RecName: Full=M-phase inducer phosphatase 2; AltName: Full=Dual specificity phosphatase Cdc25B</p> <p>MEVPQPEPAPGSALSPAGVCGGAQRPGHLPGLLLGSHGLLSPVRAAASSPVTTLTQTMHDLAGLGSETP KSQVGTLLFRSRSRLTHLSRRASESSLSSESSESSDAGLCMDSPPMDPHMAEQTFEQAIQAASRIIR NEQFAIRRFQSMQPVRLGHSVPLRNITNSQAPDGRRKSEAGSAGSASSGEDKENDGFVFKMPWKPTHSS THALAEWASRRFAQRPSAPDLMCLSPDRKMEVEELSPALALGRFSLTPAEGDTEEDDGFVDILES<sup>D</sup>LK DDAVPPGMESLISAPLVKTLKKEEKDLVMSKQRLFRSPMPCSVIRPILKRLERPQDRDTPVQNKR</p>                                                                                                                                                                                                                                                                                                                                                                                                                                                                                                                                                         |  |

|                                                                                                                                                                                                                                                                                                                                                                                                                                                                                                                                                                                                                                                                                                                                                                                                                                                                                                                                                                                                                                                                                                                                                                                                                                                                                                                                                                                                                                                                                                                                                                                                                                                                                                                                                                                                                                                                                                                                                                                                                                                                                                                                                                                                                                                                                                        |  |
|--------------------------------------------------------------------------------------------------------------------------------------------------------------------------------------------------------------------------------------------------------------------------------------------------------------------------------------------------------------------------------------------------------------------------------------------------------------------------------------------------------------------------------------------------------------------------------------------------------------------------------------------------------------------------------------------------------------------------------------------------------------------------------------------------------------------------------------------------------------------------------------------------------------------------------------------------------------------------------------------------------------------------------------------------------------------------------------------------------------------------------------------------------------------------------------------------------------------------------------------------------------------------------------------------------------------------------------------------------------------------------------------------------------------------------------------------------------------------------------------------------------------------------------------------------------------------------------------------------------------------------------------------------------------------------------------------------------------------------------------------------------------------------------------------------------------------------------------------------------------------------------------------------------------------------------------------------------------------------------------------------------------------------------------------------------------------------------------------------------------------------------------------------------------------------------------------------------------------------------------------------------------------------------------------------|--|
| <p>RRSVTPPEEQEAEFPKARVLRKSLCHDEIENLLDSDHRELIGDYSKAFLLQTVDVGKHQDLKYISPETM<br/>VALLTGKFSNIVDKFVIVDCRYPYEYEGGHKTAVNLPLEPDAESFLLKSPIAPCSLDKRVILIFHCFES<br/>SERGPRMCRFIRERDRANDYPSLYPEMYILKGGYKEFFPQHNPFCPEQDYRPMNHEAFKDELKTRFLK<br/>TRSWAGERSRRELCSRLQDQ</p> <p><b>Notes</b></p> <p><b>References to 14-3-3 binding to Cdc25B</b></p> <p>Pirino G, Wescott MP, Donovan PJ. Protein kinase A regulates resumption of meiosis by phosphorylation of Cdc25B in mammalian oocytes. <i>Cell Cycle</i>. 2009 Feb 15;8(4):665-70.</p> <p>Conklin DS, Galaktionov K, Beach D. 14-3-3 proteins associate with cdc25 phosphatases. <i>Proc Natl Acad Sci U S A</i>. 1995 Aug 15;92(17):7892-6.</p> <p>Bulavin DV, Higashimoto Y, Popoff IJ, Gaarde WA, Basur V, Potapova O, Appella E, Fornace AJ Jr. Initiation of a G2/M checkpoint after ultraviolet radiation requires p38 kinase. <i>Nature</i>. 2001 May 3;411(6833):102-7.</p> <p>Uchida S, Kubo A, Kizu R, Nakagama H, Matsunaga T, Ishizaka Y, Yamashita K. Amino acids C-terminal to the 14-3-3 binding motif in CDC25B affect the efficiency of 14-3-3 binding. <i>J Biochem</i>. 2006 Apr;139(4):761-9.</p> <p>Manke IA, Nguyen A, Lim D, Stewart MQ, Elia AE, Yaffe MB. MAPKAP kinase-2 is a cell cycle checkpoint kinase that regulates the G2/M transition and S phase progression in response to UV irradiation. <i>Mol Cell</i>. 2005 Jan 7;17(1):37-48.</p> <p>Lindqvist A, Källström H, Karlsson Rosenthal C. Characterisation of Cdc25B localisation and nuclear export during the cell cycle and in response to stress. <i>J Cell Sci</i>. 2004 Oct 1;117(Pt 21):4979-90.</p> <p>Uchida S, Kuma A, Ohtsubo N, Shimura M, Hirata M, Nakagama H, Matsunaga T, Ishizaka Y, Yamashita K. Binding of 14-3-3beta but not 14-3-3sigma controls the cytoplasmic localization of CDC25B: binding site preferences of 14-3-3 subtypes and the subcellular localization of CDC25B. <i>J Cell Sci</i>. 2004 Jun 15;117(Pt 14):3011-20.</p> <p>Bulavin DV, Higashimoto Y, Demidenko ZN, Meek S, Graves P, Phillips C, Zhao H, Moody SA, Appella E, Piwnicka-Worms H, Fornace AJ Jr. Dual phosphorylation controls Cdc25 phosphatases and mitotic entry. <i>Nat Cell Biol</i>. 2003 Jun;5(6):545-51.</p>                                                      |  |
| <p><b>Human Cdc25C</b> M-phase inducer phosphatase 3 (Swissprot = P30307)</p> <p>1 MSTELFSSTR EEGSSGSGPS FRSNQRKMLN LLLERDTSFT VCPDVPRTPV GKFLGDSANL<br/>61 SILSGGTPKR CLDLSNLSSG EITATQLTTS ADLDETGHL D SSGLQEVHLA GMNHDQHLMK<br/>121 CSPAQLLCST PNGLDGRGHRK RDAMCSSAN KENDNGNLVD SEMKYLGSPI TTVPKLDKNP<br/>181 NLGEDQAEI SDELMEFSLK DQEAQVSRSG LYRSPMPEN LNRPRKQVE KFKDNTIPDK<br/>241 VKKQYFSGQG KLRKGLCLKK TVSLCDITIT QMLEEDSNQG HLIIGDFSKVC ALPTVSGKHQ<br/>301 DLKYVNPETV AALLSGKFGQ LIEKFYVIDC RYPYELGGH IQGALNLYSQ EELFNFFLKK<br/>361 PIVPLDTQKR IIVFHCFES SERGPRMCR LREEDRSINQ YPALYPPELY ILKGGYRDFE<br/>421 PEYMELCEPQ SYCPMHQDH KTELLRCRSQ SKVQEGERQL REQIALLVKD MSP<br/>&gt;gi 116242631 sp P30307.2 MIP3_HUMAN RecName: Full=M-phase inducer<br/>phosphatase 3; AltName: Full=Dual specificity phosphatase Cdc25C<br/>MSTELFSSTREGSSGSGPSFRSNQRKMLNLLERDTSFTVCPDVPRTPVGKFLGDSANLSILSGGTPKR<br/>CLDLSNLSSGEITATQLTTSADLDETGHL D SSGLQEVHLA GMNHDQHLMKCSPAQLLCSTPNGLDGRGHRK<br/>RDAMCSSANKENDNGNLVDSEMKYLGSPITTVPKLDKNPDLGEDQAEI SDELMEFSLKDQEAQVSRSG<br/>LYRSPMPENLNRPRKQVEKFKDNTIPDKVKKYFSGQGKLRKGLCLKKTVSLCDITITQMLEEDSNQG<br/>HLIIGDFSKVCALPTVSGKHQDLKYVNPETVAALLSGKFGQLIEKFYVIDCRYPYELGGHIQGALNLYSQ<br/>EELFNFFLKKPIVPLDTQKRI IIVFHCFESSERGPRMCRCLREEDRSINQYPALYPPELYILKGGYRDFE<br/>PEYMELCEPQSYCPMHQDHKTELLRCRSQSKVQEGERQLREQIALLVKDMSP</p> <p><b>Notes</b></p> <p>Phosphorylated by CHK1 on Ser-216. This phosphorylation creates a binding site for 14-3-3 protein and inhibits the phosphatase.</p> <p><b>References to 14-3-3 binding to Cdc25C</b></p> <p>Telles E, Hosing AS, Kundu ST, Venkatraman P, Dalal SN. A novel pocket in 14-3-3epsilon is required to mediate specific complex formation with cdc25C and to inhibit cell cycle progression upon activation of checkpoint pathways. <i>Exp Cell Res</i>. 2009 May 1;315(8):1448-57.</p> <p>Bulavin DV, Higashimoto Y, Popoff IJ, Gaarde WA, Basur V, Potapova O, Appella E, Fornace AJ Jr. Initiation of a G2/M checkpoint after ultraviolet radiation requires p38 kinase. <i>Nature</i>. 2001 May 3;411(6833):102-7.</p> <p>Graves PR, Lovly CM, Uy GL, Piwnicka-Worms H. Localization of human Cdc25C is regulated both by nuclear export and 14-3-3 protein binding. <i>Oncogene</i>. 2001 Apr 5;20(15):1839-51.</p> |  |
| <p><b>Human CDC2L2=CDK11p110</b> (Cyclin-dependant Kinase 11) (Swissprot = P21127)</p> <p>1 MGDEKDSWKV KTLDEILQEK KRRKEQEEKA EIKRLKNSDD RDSKRDSLEE GELRDHRMEI<br/>61 TIRNSPYRRE DSMEDRGEED DSLAIKPPQQ MSRKEKVHHR KDEKRKEKRR HRS HSAEGGK<br/>121 HARVKEKERE HERRKRHREE QDKARREWER QKRREMAREH SRERDRLEQ LERKRERERK<br/>181 MREQQKEQRE QKERERRAEE RKRERARE VSAAHRTMRE DYSDKVKASH WSRSPRPFR<br/>241 ERFELGDGRK PGEARPARAQ KPAQLKEEK EERDLSLDLQ DISDSERKTS SAESSAESG<br/>301 SGSEEEEEEE EEEEEEGSTS EEEEEETGSN SEEASEQSAE EVSEEMSED<br/>361 EERENENHLL VVPESRFRD SGSEEEAEEE VEGGTPQSSA LTEGDYVPS PALSPIELKQ<br/>421 ELPKYLPAQ GCRSVEEFQC LNRIEEGTYG VYRAKDKKT DEIVALKRLK MEKEKEGFPI<br/>481 TSLREINTIL KAQHPNIVTV REIVVGSNMD KIYIVMNYVE HDLKSLMETM KQFFLPGEVK<br/>541 TLMTQLLRGV KHLHDNWILH RDLKTSNLLL SHAGILKVG D FGLAREYSGP LKAYTPVVVT<br/>601 LWYRAPELLL GAKEYSTAVD MWSVGCIFGE LLTQKPLFPG KSEIDQINKV FKDLGTPSEK<br/>661 IWPGYSELPA VKKMTFSEHP YNNLRKRFGA LLSDDQGFDM NKFLTYFPGR RISAEGLKH<br/>721 EYFRETPLPI DPSMFTWPA KSEQQRVRRG TSPRPPEGGL GYSQLGDDDL KETGFHLTTT<br/>781 NQGASAAAGPG FSLKF<br/>&gt;gi 34978359 sp P21127.3 CD2L1_HUMAN RecName: Full=PITSLRE serine/threonine-<br/>protein kinase CDC2L1; AltName: Full=Cell division cycle 2-like protein<br/>kinase 1; Short=CLK-1; AltName: Full=p58 CLK-1; AltName:<br/>Full=Galactosyltransferase-associated protein kinase p58/GTA; AltName:<br/>Full=CDK11<br/>MGDEKDSWKV KTLDEILQEK KRRKEQEEKA EIKRLKNSDD RDSKRDSLEE GELRDHRMEI TIRNSPYRRE</p>                                                                                                                                                                                                                                                                                                                                                                                                                                                                                                                                                                                                                                                                                                                                                                                                   |  |

|                                                                                                                                                                                                                                                                                                                                                                                                                                                                                                                                                                                                                                                                                                                                                                                                                                                                                                                                                                                                                                                                                                                                                                                                                                                                                                                                                                                                                                                                                                                                                                                                                                                                                                                                                                                                                                                                                                                                                                                                                                                                                                                                                                                                                                                                                                                                                                                                                                                                                                                                                                                                                                                                                                                                                                                                                                                                                                                                                                                                                                                                                                                                                                                                                                                                                                                                                                                                                                                                                                                                                                                                                                                                                                                                                                                                                                                   |  |
|---------------------------------------------------------------------------------------------------------------------------------------------------------------------------------------------------------------------------------------------------------------------------------------------------------------------------------------------------------------------------------------------------------------------------------------------------------------------------------------------------------------------------------------------------------------------------------------------------------------------------------------------------------------------------------------------------------------------------------------------------------------------------------------------------------------------------------------------------------------------------------------------------------------------------------------------------------------------------------------------------------------------------------------------------------------------------------------------------------------------------------------------------------------------------------------------------------------------------------------------------------------------------------------------------------------------------------------------------------------------------------------------------------------------------------------------------------------------------------------------------------------------------------------------------------------------------------------------------------------------------------------------------------------------------------------------------------------------------------------------------------------------------------------------------------------------------------------------------------------------------------------------------------------------------------------------------------------------------------------------------------------------------------------------------------------------------------------------------------------------------------------------------------------------------------------------------------------------------------------------------------------------------------------------------------------------------------------------------------------------------------------------------------------------------------------------------------------------------------------------------------------------------------------------------------------------------------------------------------------------------------------------------------------------------------------------------------------------------------------------------------------------------------------------------------------------------------------------------------------------------------------------------------------------------------------------------------------------------------------------------------------------------------------------------------------------------------------------------------------------------------------------------------------------------------------------------------------------------------------------------------------------------------------------------------------------------------------------------------------------------------------------------------------------------------------------------------------------------------------------------------------------------------------------------------------------------------------------------------------------------------------------------------------------------------------------------------------------------------------------------------------------------------------------------------------------------------------------------|--|
| <p>DSMEDRGEEDDSLAIKPPQQMSRKEKVVHHRKDEKRKRRRSHSAEGGKHARVKEKEREHERRRKRHREE<br/>QDKARREWERQKRREAREHSRRERDRLEQLERKRERERKMRQEQKEQREKQERERRAEERRKEREARE<br/>VSAHHRTMRDYSKVKASHWSRSPPRRPRERFELGDRKPGEARPARAQKPAQLKEEKMEERDLSLDLQ<br/>DISDSERKTSSAESSSAESGSGSEEEEEEEEEEEEEEGSTSEEEEEEEEEEEEEETGSNSEEASEQS<br/>EVSEEMSEDEERENENHLLVVPESRFDRDSGESEAEVEEGTQOSSALTEGDDVVPDSPALSPIELKQ<br/>ELPKYLPALQGCRCRSEVEFQCLNRIEETGYVVYRAKDKKTDEIVALKRLKMEKEKEGFPTSLREINTIL<br/>KAQHNPVIVTVEIIVVGSNMDKIYIVMNYVEHDLKSLMETMKQPFLLPGEVKTLMIQLLRGVVKHLHDNWLH<br/>RDLKTSNLLLSHAGILKVGDFGLAREYGSPLKAYTPVVVTLWYRAPELLLGAKEYSTAVDMWVSGCIFGE<br/>LLTQKPLFPKSEIDQINKVFKDLGTPSEKIWPGYSELPAVKMTFSEHPYNNLRKRFRGALLSDQGFDDLM<br/>NKFLTYFPGRRI SAEDGLKHEYFRETPLP1DPSMFP1TWP1AKSE1QQ1RVK1G1TS1PR1PE1GG1L1YS1QL1G1D1D1L1<br/>KETGFHLTTTNGASAAAGPGFSLKF</p> <p><b>Notes</b><br/>RHRpS<sup>118</sup>HS = Ser113 in P21127.</p> <p><b>References to 14-3-3 binding to CDK11<sup>p110</sup></b><br/>Feng Y, Qi W, Martinez J, Nelson MA. The cyclin-dependent kinase 11 interacts with 14-3-3 proteins. <i>Biochem Biophys Res Commun.</i> 2005 Jun 17;331(4):1503-9.<br/>Wilker EW, van Vugt MA, Artim SA, Huang PH, Petersen CP, Reinhardt HC, Feng Y, Sharp PA, Sonenberg N, White FM, Yaffe MB. 14-3-3sigma controls mitotic translation to facilitate cytokinesis. <i>Nature.</i> 2007 Mar 15;446(7133):329-32.</p>                                                                                                                                                                                                                                                                                                                                                                                                                                                                                                                                                                                                                                                                                                                                                                                                                                                                                                                                                                                                                                                                                                                                                                                                                                                                                                                                                                                                                                                                                                                                                                                                                                                                                                                                                                                                                                                                                                                                                                                                                                                                                                                                                                                                                                                                                                                                                                                                                                                                      |  |
| <p><b>Human CDKN1B (p27Kip1)</b> Cyclin-dependent kinase inhibitor 1B (Swissprot = P46527)</p> <p>1 MSNVRVSNNGS PSLERMDARQ AEHPKPSACR NLFPGVDHEE LTRDLEKHC R DMEEASQRKW<br/>61 NFDQFNHKL EGYEWQVEE KGLPEFYR PPRPPKGACK VPAQESQDVS GSRPAAPLIG<br/>121 APANSEDTL VDPKTDPSDS QTGLAEQCAG IRKRPAEDDS STQNKANRT EENVSDGSPN<br/>181 AGSVEQTPKK PGLRRRQT</p> <p>&gt;gi 1168871 sp P46527.1 CDN1B_HUMAN RecName: Full=Cyclin-dependent kinase inhibitor 1B; AltName: Full=Cyclin-dependent kinase inhibitor p27; AltName: Full=p27Kip1</p> <p>MSNVRVSNNGSPSLERMDARQAEHPKPSACRNLFGPVDHEELTRDLEKHC R DMEEASQRKWNFDQFNHKL<br/>EGYEWQVEEKGLPEFYRPPRPPKGACKVPAQESQDVSGSRPAAPLIGAPANSEDTLVDPKTDPSDS<br/>QTGLAEQCAGIRKRPAEDDSSTQNKANRTEENVSDGSPNAGSVEQTPKKPGLRRRQT</p> <p><b>Notes</b><br/>p27Kip1 a cell-cycle regulatory protein that interacts with cyclin-CDK2 and -CDK4, inhibiting cell cycle progression at G1. May mediate TGF beta-induced g1 arrest. Its degradation is triggered by its CDK dependent phosphorylation and subsequent ubiquitination by SCF complexes, is required for the cellular transition from quiescence to the proliferative state.<br/>Akt bound directly to and phosphorylated p27(Kip1). Screening p27(Kip1) phosphorylation sites identified the COOH-terminal Thr(198) residue as a novel site. Further analysis revealed that 14-3-3 proteins bound to p27(Kip1) through Thr(198) only when it was phosphorylated by Akt. Although Akt also phosphorylated p27(Kip1) at Ser(10) and Thr(187), these two sites were not involved in the binding to 14-3-3 proteins. p27(Kip1) phosphorylated at Thr(198) exists only in the cytoplasm. Therefore, Akt promotes cell-cycle progression through the mechanisms of phosphorylation-dependent 14-3-3 binding to p27(Kip1) and cytoplasmic localization.<br/>p90 ribosomal protein S6 kinases (RSKs) could bind to and directly phosphorylate p27Kip1 at Thr198 in a Ras/Raf/MEK-dependent manner. RSK-dependent phosphorylation promoted the p27Kip1 binding to 14-3-3 and its cytoplasmic localization.<br/>“Consistent with the previous reports, the interaction between 14-3-3 and p27Kip1 was weakened when the T157 or T198 residue in p27Kip1 was converted to Ala (T157A or T198A, respectively).” “14-3-3 proteins preferentially bound to p27Kip1 that was phosphorylated at the T198 residue rather than at the T157 residue. (Morishita et al 2008).”</p> <p><b>References to 14-3-3 binding to CDKN1B (p27Kip1)</b><br/>Fujita N, Sato S, Tsuruo T. Phosphorylation of p27Kip1 at threonine 198 by p90 ribosomal protein S6 kinases promotes its binding to 14-3-3 and cytoplasmic localization. <i>J Biol Chem.</i> 2003 Dec 5;278(49):49254-60.<br/>Morishita D, Katayama R, Sekimizu K, Tsuruo T, Fujita N. Pim kinases promote cell cycle progression by phosphorylating and down-regulating p27Kip1 at the transcriptional and posttranscriptional levels. <i>Cancer Res.</i> 2008 Jul 1;68(13):5076-85.<br/>Fujita N, Sato S, Katayama K, Tsuruo T. Akt-dependent phosphorylation of p27Kip1 promotes binding to 14-3-3 and cytoplasmic localization. <i>J Biol Chem.</i> 2002 Aug 9;277(32):28706-13.<br/>Sekimoto T, Fukumoto M, Yoneda Y. 14-3-3 suppresses the nuclear localization of threonine 157-phosphorylated p27(Kip1). <i>EMBO J.</i> 2004 May 5;23(9):1934-42.<br/>Wang Z, Yu BW, Rahman KM, Ahmad F, Sarkar FH. Induction of growth arrest and apoptosis in human breast cancer cells by 3,3-diindolylmethane is associated with induction and nuclear localization of p27kip. <i>Mol Cancer Ther.</i> 2008 Feb;7(2):341-9.<br/>Rosner M, Freilinger A, Hanneder M, Fujita N, Lubec G, Tsuruo T, Hengstschläger M. p27Kip1 localization depends on the tumor suppressor protein tuberlin. <i>Hum Mol Genet.</i> 2007 Jul 1;16(13):1541-56.</p> |  |
| <p><b>Human CENPJ</b> (Centromere protein J) CPAP (Centrosomal Protein 4.1-Associated Protein) (Swissprot = Q9HC77)</p> <p>1 MFLMPTSSSEL NSGQNFLTQW MTNPSRAGVI LNRGFPILEA DKEKRAAVDI STSFPIKGT<br/>61 FSDSFSFINE EDSLLEEQKL ESNPNYPKQS DKSETHTAFP CIKKGQVAA CHSAPGHQEE<br/>121 NKNDFIPLDLA SEFKEGAYKD PLFKKLEQLK EVQKKQEQQL KRQQLEQLQR LMEEQEKL<br/>181 MVSGQCTLPG LSLLPDDQS QKRSFGNTT GERATCCFFS YVYDPDTEEE TYPNLSLSE<br/>241 QSNFCRTAHG DFVLTSKRAS PNLFSEAQYQ EAPVEKNNLK EENRNHPTGE SILCWEKVTE<br/>301 QIQEANDKNL QKHDDSSVA NIEERPIKAA IGERKQTFED YLEEQIQLEE QELKQKQLKE<br/>361 AEGPLPIKAK PKQPFLLKRG GLARFTNAKS KFQKGESKL VTNQSTSEDQ PLFKMDRQQL<br/>421 QRKTKLNKE LCADNPILKK DSKARTKSGS VTLQKPKML KCSNRKSLSP SGLKIQTGKK<br/>481 CDGQFRDQIK FENKVTSSNK ENVTECPKPC DTGCTGWNKT QGKDRPLST GPASRLAAS<br/>541 PIRETMKESE SSLDVSLQKK LETWEREKEK ENLELDEFLE LEQAADLISF SSNSFVLKI<br/>601 LERDQQICKG HRMSSTPVKA VPQKTNPADP ISHCNRSDEL DHTAREKESE CEVAPKQLHS</p>                                                                                                                                                                                                                                                                                                                                                                                                                                                                                                                                                                                                                                                                                                                                                                                                                                                                                                                                                                                                                                                                                                                                                                                                                                                                                                                                                                                                                                                                                                                                                                                                                                                                                                                                                                                                                                                                                                                                                                                                                                                                                                                                                                                                                                                                                                                                                                                                                                                                                                                                                                                                                                                                                                                                                                                                                                                                                         |  |

|                                                                                                                                                                                                                                                                                                                                                                                                                                                                                                                                                                                                                                                                                                                                                                                                                                                                                                                                                                                                                                                                                                                                                                                                                                                                                                                                                                                                                                                                                                                                                                                                                                                                                                                                                                                                                                                                                                                                                                                                                                                                                                                                                                                                                                                                                                                                                                                                                                                                                                                                                                                                                                                                                                                                                                                                                                                                                                                                                                                                                                                                                                                                                                                                                                                                                                                                                                                                                                                                                                         |                                           |
|---------------------------------------------------------------------------------------------------------------------------------------------------------------------------------------------------------------------------------------------------------------------------------------------------------------------------------------------------------------------------------------------------------------------------------------------------------------------------------------------------------------------------------------------------------------------------------------------------------------------------------------------------------------------------------------------------------------------------------------------------------------------------------------------------------------------------------------------------------------------------------------------------------------------------------------------------------------------------------------------------------------------------------------------------------------------------------------------------------------------------------------------------------------------------------------------------------------------------------------------------------------------------------------------------------------------------------------------------------------------------------------------------------------------------------------------------------------------------------------------------------------------------------------------------------------------------------------------------------------------------------------------------------------------------------------------------------------------------------------------------------------------------------------------------------------------------------------------------------------------------------------------------------------------------------------------------------------------------------------------------------------------------------------------------------------------------------------------------------------------------------------------------------------------------------------------------------------------------------------------------------------------------------------------------------------------------------------------------------------------------------------------------------------------------------------------------------------------------------------------------------------------------------------------------------------------------------------------------------------------------------------------------------------------------------------------------------------------------------------------------------------------------------------------------------------------------------------------------------------------------------------------------------------------------------------------------------------------------------------------------------------------------------------------------------------------------------------------------------------------------------------------------------------------------------------------------------------------------------------------------------------------------------------------------------------------------------------------------------------------------------------------------------------------------------------------------------------------------------------------------------|-------------------------------------------|
| <p>661 LSSADELREQ PCKIRKAVQK STSENQTEWN ARDDEGVPNS DSSTDSEEQL DVTIKPSTED<br/> 721 RERGISSRED SPQVCDDKGP FKDTRTQEDK RRDVLDLSD KDYSSDESIM ESIKHKVSEK<br/> 781 SRSSLSLSK MDFDDERTWT DLEENLCNHD VVLGNestyG TPQTCYPNNE IGILDKTIKR<br/> 841 KIAVPKRGED LSKSRRSRSP PTSELMMKFF PSLLKPKPSD SHLGNELKLN ISQDQPPGDN<br/> 901 ARSQVLREKI IELETEIEKF KAENASLAKL RIERESALEK LRKEIADFEQ QKAKELARIE<br/> 961 EFKKEEMRKL QKERKVFKEY TTAARTFPDK KEREIQTLLK QIADLREDL KRKTKWSSST<br/> 1021 HSRLRSQIQM LVRENTDLRE EIKVMERFRL DAWKRAEAE SSLEVEKKDK LANTSVRFQN<br/> 1081 SQISSGTQVE KYKKNYLPMQ GNPPRRSKSA PPRDLGNLDK GQAASPREPL EPLNFPDPEY<br/> 1141 KEEEDQDIQ GEISHPDGKV EKVKNGCRV ILFPNGTRKE VSADGKTITV TFFNGDVQVQ<br/> 1201 MPDQRVIIYY AAAQTTHTTY PEGLEVLHFS SGQIEKHYPD GRKEITFPDQ TVKNLFPDGO<br/> 1261 EESIFPDGTI VRVQRDGNK IEFNNGQREL HTAQFKRREY PDGTVKTVYA NGHQETKYRS<br/> 1321 GRIRVKDKEG NVLMDTEL</p> <p>&gt;gi 62899891 sp Q9HC77.2 CENPJ_HUMAN RecName: Full=Centromere protein J;<br/> Short=CENP-J; AltName: Full=Centrosomal P4.1-associated protein; AltName:<br/> Full=LAG-3-associated protein; AltName: Full=LYST-interacting protein 1<br/> MFLMPTSSSELNSGQNFQWMTNPSRAGVILNRGFPFILEADKEKRAAVDISTSFPKIGTHFSDFSFINE<br/> EDSLLEEQLKLESNNPYKQSDKSEHTAFPCIKKGPQVAACHSAPGHQEENKNDIFDLASEFKEGAYKD<br/> PLFKKLEQLKEVQKQKQEQQLKRQQLQLRLMEEQEKLLTMVSGQCTLPGLSLPDDQSQKHRSPGNTTT<br/> GERATCCFPYVYVYDPDTEETYPNSILSHEQSNFCRTAHGDFVLTSKRASPNLFSQAQYQEAPEVEKNL<br/> EENRNHPTGESILCWEKVTEQIQEANDKNLQKHDDSSSEVANIIEERPIKAAIGERKQTFEDYLEEQIQL<br/> QELKQKQKKAEGPLPIKAKPKQFLKRGELARFTNAKSKFKQKRESKLVNQTSEDQPLFKMDRQQL<br/> QRKTALKNKELCADNPILKDKSKARTKSGSVTLSQKPKMLKCSNRKSLSPSGLKIQTGKKCDGQFRDQIK<br/> FENKVTSSNNKENTECPKPCDTGCTGWNKTQKDRPLPLSTGPASRLAAKSPIRETMKESESLDVSQK<br/> LETWEREKEKENLELDEFLEQAADIEISSNSSFVLKILERDQIQCKGHRMSSTPVKAVPQKTNPADP<br/> ISHCNRSEDLHTAREKESECEVAPKQLHSLSSADELREQPCKIRKAVQKSTSENQTEWNARDDEGVPNS<br/> DSSTDSEEQLDVTIKPSTEDRERGISSREDSPQVCDDKGFKDRTRTQEDKRRDVLDSLSDKYSSDESIM<br/> ESIKHKVSEPSRSSLSSLSKMFDDERTWTDLLENLCNHDVVLGNestyGTPQTCYPNNEIGILDKTIKR<br/> KIAVPKRGEDLSKSRRSRSPPTSELMMKFFPSLLKPKPSDHLGNELKLNISQDQPPGDNARSQVLEKI<br/> IELETEIEKFAENASLAKLRIERESALEKLRKEIADFEQKAKELARIEEFKKEEMRKLQKERKVFKEY<br/> TTAARTFPDKKEREIQTLLKQIADLREDLKRKTKWSSSTHSRLRSQIQMLVRENTDLREIEIKVMERFRL<br/> DAWKRAEAEISSLEVEKKDKLANTSVRFQNSQISSGTQVEKYKKNYLPMQGNPPRRSKSA PPRDLGNLDK<br/> GQAASPREPLEPLNFPDPEYKEEEDQDIQGEISHPDGKVEKVKNGCRVILFPNGTRKEVSADGKTITV<br/> TFFNGDVQVMPDQRVIIYYAAAQTTHTTYPEGLEVLHFS SGQIEKHYPDGRKEITFPDQTVKNLFPDGO<br/> EESIFPDGTIVRVQRDGNKIEFNNGQRELHTAQFKRREYPDGTVKTVYANGHQETKYRSGRIRVKDKEG<br/> NVLMDTEL</p> <p><b>Notes</b><br/> "May play an important role in cell division and centrosome function. Inhibits microtubule nucleation from the centrosome.<br/> Mutation of serine 1109 to alanine (S1109A) in the 14-3-3 binding motif (PRRSKsAP) completely abolished the association of CPAP with 14-3-3. The interaction between CPAP and 14-3-3 was significantly reduced in mitotic cells, suggesting that 14-3-3 binding to CPAP is regulated during cell cycle progression. Another Ser859 located within the first 14-3-3 binding motif (<sup>856</sup>RSRSP<sup>861</sup>) may also participate in 14-3-3 binding. Chen et al (2006)"</p> <p><b>References to 14-3-3 binding to CENPJ</b><br/> Chen CY, Olayioye MA, Lindeman GJ, Tang TK. CPAP interacts with 14-3-3 in a cell cycle-dependent manner. <i>Biochem Biophys Res Commun.</i> 2006 Apr 21;342(4):1203-10.</p> |                                           |
| <p><b>Human CFL1</b> Cofilin 1 (Swissprot = P23528)<br/> 1 MASGVAVSDG VIKVFNMDKV RKSSTPEEVK KRKKAFLVCL SEDKKNIIIE EGKEILVGDV<br/> 61 GQTVDDPYAT FVKMLPDKDC RYALYDATYE TKESKKEDLV FIFWAPESAP LKSKMIYASS<br/> 121 KDAIKKKLTG IKHELQANCY EEVKDRCTLA EKLGGSAVIS LEGKPL</p> <p>&gt;gi 116848 sp P23528.3 COF1_HUMAN RecName: Full=Cofilin-1; AltName:<br/> Full=Cofilin, non-muscle isoform; AltName: Full=18 kDa phosphoprotein;<br/> AltName: Full=p18</p> <p>MASGVAVSDGVIKVFNMDKVRKSSSTPEEVKRRKKAFLVCLSEDKKNIIIEEGKEILVGDVGGQTVDDPYAT<br/> FVKMLPDKDCRYALYDATYETKESKKEDLVFIFWAPESAPLKSCKMIYASSDAIKKKLTGIKHELQANCY<br/> EEVKDRCTLAEKLGGSAVISLEGKPL</p> <p><b>Notes</b><br/> MAPs<sup>3</sup>GVAV, RKSps<sup>24</sup>TP</p> <p><b>References to 14-3-3 binding to cofilin</b><br/> Edwards DC, Sanders LC, Bokoch GM, Gill GN. Activation of LIM-kinase by Pak1 couples Rac/Cdc42 GTPase signalling to actin cytoskeletal dynamics. <i>Nat Cell Biol.</i> 1999 Sep;1(5):253-9.<br/> Maekawa M, Ishizaki T, Boku S, Watanabe N, Fujita A, Iwamatsu A, Obinata T, Ohashi K, Mizuno K, Narumiya S. Signaling from Rho to the actin cytoskeleton through protein kinases ROCK and LIM-kinase. <i>Science.</i> 1999 Aug 6;285(5429):895-8.<br/> Gohla A, Bokoch GM. 14-3-3 regulates actin dynamics by stabilizing phosphorylated cofilin. <i>Curr Biol.</i> 2002 Oct 1;12(19):1704-10.<br/> Birkenfeld J, Betz H, Roth D. Identification of cofilin and LIM-domain-containing protein kinase 1 as novel interaction partners of 14-3-3 zeta. <i>Biochem J.</i> 2003 Jan 1;369(Pt 1):45-54.</p>                                                                                                                                                                                                                                                                                                                                                                                                                                                                                                                                                                                                                                                                                                                                                                                                                                                                                                                                                                                                                                                                                                                                                                                                                                                                                                                                                                                                                                                                                                                                                                                                                                                                                                                                                                                                                                                                                                                  |                                           |
| <p><b>Human CRTCS2</b> (TORC2) (Swissprot = Q53ET0)<br/> 1 MATSANGPVG SATASASNPR KFSEKIALQK QRQAEETAFAF EEVMMDIGST RLQAQKLRLLA<br/> 61 YTRSSHYYGG LPNVNQIGSG LAEFQSPLHS PLDSSRSTRH HGLVERVQRD PRRMVSPLRR<br/> 121 YTRHIDSSPY SPAYLSPPE SSWRRTMAWG NFPAEKGLF RLPSALNRTS SDALHTSVM<br/> 181 NPSPQDTPYG PTTPSILPSR NGGILDGEMD PKVPAIENL LDDKHLKLPV DAKKLSSSSS<br/> 241 RPRSCEVPGI NIFPSPDQPA RRVVLPPAMN TGGSLPDLTN LHFPPPLTP LDPEETAYPS<br/> 301 LSGGNSTSNL THTMTHLGIS RGMGLPGYD APGLHSPLSH PSLQSSLSNP NLQASLSSPQ<br/> 361 PQLQGSHSHP SLPASSLARH VLPTTSLGHP SLAPALSSS SSSSSTSSPV LGAPSYFASP<br/> 421 PGASPHHRRV PLSPLSLLAG PADARRSQQQ LPKQFSPMTS PTLSSITQGV PLDTSKLSTD</p>                                                                                                                                                                                                                                                                                                                                                                                                                                                                                                                                                                                                                                                                                                                                                                                                                                                                                                                                                                                                                                                                                                                                                                                                                                                                                                                                                                                                                                                                                                                                                                                                                                                                                                                                                                                                                                                                                                                                                                                                                                                                                                                                                                                                                                                                                                                                                                                                                                                                                                                                                                                                                                                                                                                                                                                                                                 | <p>ONLY USE phosphoSER171 FOR WEBLOGO</p> |

|                                                                                                                                                                                                                                                                                                                                                                                                                                                                                                                                                                                                                                                                                                                                                                                                                                                                                                                                                                                                                                                                                                                                                                                                                                                                                                                                                                                                                                                                                                                                                                                                                                                                                                                                                                                                                                                                                                                                                                                                                                                                                                                                                                                                                                                                                                                                                                                                                                                                                                                                                                                                                                                                                                                                                                                                                                                                                                                                                                                                                                                                                                                                                                                                                                                                                                                                                                                                                                                                                                                                                                                                                                                                                                                                                                                                                                                                                                                                                                                                                                                                                                                                                                                                                                                                                                                                                                                                                                                                                                                                                                                                                                       |  |
|---------------------------------------------------------------------------------------------------------------------------------------------------------------------------------------------------------------------------------------------------------------------------------------------------------------------------------------------------------------------------------------------------------------------------------------------------------------------------------------------------------------------------------------------------------------------------------------------------------------------------------------------------------------------------------------------------------------------------------------------------------------------------------------------------------------------------------------------------------------------------------------------------------------------------------------------------------------------------------------------------------------------------------------------------------------------------------------------------------------------------------------------------------------------------------------------------------------------------------------------------------------------------------------------------------------------------------------------------------------------------------------------------------------------------------------------------------------------------------------------------------------------------------------------------------------------------------------------------------------------------------------------------------------------------------------------------------------------------------------------------------------------------------------------------------------------------------------------------------------------------------------------------------------------------------------------------------------------------------------------------------------------------------------------------------------------------------------------------------------------------------------------------------------------------------------------------------------------------------------------------------------------------------------------------------------------------------------------------------------------------------------------------------------------------------------------------------------------------------------------------------------------------------------------------------------------------------------------------------------------------------------------------------------------------------------------------------------------------------------------------------------------------------------------------------------------------------------------------------------------------------------------------------------------------------------------------------------------------------------------------------------------------------------------------------------------------------------------------------------------------------------------------------------------------------------------------------------------------------------------------------------------------------------------------------------------------------------------------------------------------------------------------------------------------------------------------------------------------------------------------------------------------------------------------------------------------------------------------------------------------------------------------------------------------------------------------------------------------------------------------------------------------------------------------------------------------------------------------------------------------------------------------------------------------------------------------------------------------------------------------------------------------------------------------------------------------------------------------------------------------------------------------------------------------------------------------------------------------------------------------------------------------------------------------------------------------------------------------------------------------------------------------------------------------------------------------------------------------------------------------------------------------------------------------------------------------------------------------------------------------------------|--|
| <p>481 QRLPPYPYSS PSLVLTQPH TPKSLQQPGL PSQSCSVQSS GGQPPGRQSH YGTPYPPGPS<br/> 541 GHGQQSYHRP MSDFNLGNLE QFSMESPSAS LVLDPPGFSE GPGFLGGEGP MGGPQDPHT<br/> 601 NHQNLTHCSR HGSGFNILT GDSSPGFSKE IAAALAGVFG FEVSAAGLEL GLGLEDELRLM<br/> 661 EPLGLEGLNM LSDPCALLPD PAVEESFRSD RLQ</p> <p>&gt;gi 167009135 sp Q53ET0.2 CRTC2_HUMAN RecName: Full=CREB-regulated transcription coactivator 2; AltName: Full=Transducer of regulated cAMP response element-binding protein 2; Short=TORC-2; Short=Transducer of CREB protein 2</p> <p>MATSGANGPGSATASASNPKFSEKIALQKQRAEETAFAFEVMMMDIGSTRLQAQKRLRLAYTRSSHYGGS LPNVNQIGSGLAEFQSPLHSPLDSSRSTRHHGLVERVQRDRPRMVSPLRRYTRHIDSSPYSPAYLSPFPE SSWRRTMAWGNFPAEKQQLFRLPSALNRTSSDSALHTSVMNFPQDTPYGPPTPSPILPSRRGGILDGEMD PKVPAIEENLLDDKHLKPWDAKKLSSSSRPRSCVPGINIFPSDPQANVPVLPAMNTGGSLPDLTN LHFPPPLPTPLDPEETAYPSLSGGNSTNLTHMTHLGISRGMGLGPGYDAPGLHSPLSHPSLQSSLSNP NLQASLSSPQQLQSGSHSPSLPASPSSARHVLPTTSLGHPSLSAPALSSSSSSSSSSSSPVLGAPSPYAST PGASPHRRVPLSPSLLAGPADARRSQQLPKQFSPTMPTLSSITQGVPLDTSKLDSTQRLPPYPYSS PSLVLTQPHTPKSLQQPGLPSQSCSVQSSGGQPPGRQSHYGTTPYPPGPSGHGQQSYHRPMSDFNLGNLE QFSMESPSASLVLDPPGFSEGPGFLGGEGPMGGPQDPHTFNHQNLTCSRHGSGPNIILTDSSPGFSKE IAAALAGVFGFEVSAAGLELGLGLEDELRLMEPLGLEGLNMLSDPCALLPDPAVEESFRSDRLQ</p> <p><b>Notes</b></p> <p>All papers cite phosphoSer171 as a 14-3-3 binding site, but differ in whether phosphoSer71 (Dentin et al 2008), phosphoSer358 and/or phosphoSer275 (Jansson et al 2008) provides a second 14-3-3-binding site. AMP-activated protein kinase (AMPK) and the AMPK family members salt-inducible kinase (SIK)1 and SIK2 can phosphorylate CRTC2 at Ser 171 and thereby inhibit CRTC2 activity (Koo et al, 2005; Dentin et al, 2007). In resting cells, CRTC2 is sequestered in the cytoplasm by 14-3-3 proteins through phosphorylation at Ser70 and Ser171 by members of the AMP-activated protein kinase (AMPK) family of Ser-Thr kinases (Screaton et al 2004). Consistent with the proposed role of O-glycosylation in blocking protein phosphorylation, alanine mutations at Ser70 and Ser171 disrupted the CRTC2:14-3-3 interaction and promoted localization of these mutant CRTC2 proteins to the nucleus (Dentin et al 2008).</p> <p>TORC2 the transducer of regulated CREB protein 2 (TORC2) is a cAMP responsive coactivator that, in concert with LKB1 and AMPK, controls glucose homeostasis in the liver. Under fasting conditions, cytoplasmic TORC2 is transported to the nucleus where it binds to CREB and stimulates gluconeogenesis. Re-feeding and the ensuing insulin response inhibits gluconeogenic gene expression by promoting the phosphorylation, cytoplasmic export and degradation of TORC2. TORC2 is phosphorylated by the kinase QIK which in turn is activated by phosphorylation at Ser358 [of SIK] by insulin-activated Akt2. Phosphorylated TORC2 is subsequently ubiquitinated at Lys 628 and degraded by the 26S proteasome. TORC2 protein levels and activity are increased in diabetes owing to a block in TORC2 phosphorylation, implicating this pathway in the pathogenesis of diabetes. The CREB/TORC2 regulatory axis controls the normal pattern of germinal center (GC) B cell gene activation/repression that promotes B cell development and circumvents GC lymphomagenesis.</p> <p>Ser275 of TORC2 was identified as a 14-3-3 binding site that is phosphorylated under low glucose conditions and which becomes dephosphorylated by calcineurin in response to glucose influx. Dephosphorylation of Ser-275 is essential for both glucose and cAMP-mediated activation of CREB in beta cells and islets (Jansson et al 2008).</p> <p><b>References to 14-3-3 binding to CRTC2</b></p> <p>Screaton RA, Konkright MD, Katoh Y, Best JL, Canetti G, Jeffries S, Guzman E, Niessen S, Yates JR 3rd, Takemori H, Okamoto M, Montminy M. The CREB coactivator TORC2 functions as a calcium- and cAMP-sensitive coincidence detector. <i>Cell</i>. 2004 Oct 1;119(1):61-74.</p> <p>Jansson D, Ng AC, Fu A, Depatie C, Al Azzabi M, Screaton RA. Glucose controls CREB activity in islet cells via regulated phosphorylation of TORC2. <i>Proc Natl Acad Sci U S A</i>. 2008 Jul 22;105(29):10161-6.</p> <p>Lerner RG, Depatie C, Rutter GA, Screaton R, Balthasar N. A role for the CREB co-activator CRTC2 in the hypothalamic mechanisms linking glucose sensing with gene regulation. <i>EMBO Rep</i>. 2009 Aug 28. [Epub ahead of print]</p> <p>Dentin R, Hedrick S, Xie J, Yates J 3rd, Montminy M. Hepatic glucose sensing via the CREB coactivator CRTC2. <i>Science</i>. 2008 Mar 7;319(5868):1402-5.</p> |  |
| <p><b>Human CSF2RB</b> (GM-CSF/IL-3/IL-5 cytokine receptor common beta subunit) (Swissprot = P32927)</p> <p>1 MVLAQGLLSM ALLALCWERS LAGAEETIPL QTLRCYNDYT SHITCRWADT QDAQRLVNVT<br/> 61 LIRRVEDLL EPVSCDLSDD MPWSACPHPR CVPRRCVIPC QSFVVTDVDY FSFQDRPLG<br/> 121 TRLTVTLTQH VQPPEPRDIQ ISTDQDHFL TWSVALGSPQ SHWLSPGDLE FEVVYKRLQD<br/> 181 SWEDAAIILS NTSQATLGPE HLMPSSTYVA RVRTRLAPGS RLSGRPSKWS FEVCWDSQPG<br/> 241 DEAQPNLECF FFDGA AVLSC SWEVRKEVAS SVSFGFLYK SPDAGEECS PVLREGLGSL<br/> 301 HTRHHCQIPV PDPATHGQYI VSVQPRRAEK HIKSSVNIQM APPSLNVTKD GDSYSLRWET<br/> 361 MKMRYEHIDH TFEIQYRKDT ATWKDSKTET LQNAHSMALP ALEPSTRYVA RVRVRTSRTG<br/> 421 YNGIWESEWE ARSWDTESVL PMWVLAIVI FLTI AVLAL RFCGIYGYRL RRKWEEKIPN<br/> 481 PSKSHLFQNG SAELWPPGSM SAFTSGSPPH QGPWGSRFPE LEGVFPVGF DSEVSPLTIE<br/> 541 DPKHVCDPPS GPDTTPAASD LPTEQPPSPQ PGPPAASHTP EQQASSDFN GPYLGPPHSR<br/> 601 <b>S</b>LPDILGQPE PPQEGGSQKS PPPGSLEYLC LPAGGQVQLV PLAQAMGPGQ AVEVERRPSQ<br/> 661 SAAGSPSLES GGGAPPALG PRVGGDQDK SPVAIPMSSG DTEDPGVASG YVSSADLVFT<br/> 721 PNSGASSVSL VPSLGLPSDQ TPSLCPGLAS GPPGAPGPVK SGFEGYVELP PIEGRSPRSP<br/> 781 RNNVPPPEAK SPVLNPGERP ADVSPTSPQP ELLVLVQVQV DYCFLPLGLG GPLSLRSKPS<br/> 841 SPGPGPEIKN LDQAFQVKKP PGQAVPQVPV IQLFKALKQQ DYLSLPPWEV NKPGEVC</p> <p>&gt;gi 1345923 sp P32927.2 IL3RB_HUMAN RecName: Full=Cytokine receptor common subunit beta; AltName: Full=GM-CSF/IL-3/IL-5 receptor common beta-chain; AltName: Full=CDw131; AltName: CD antigen=CD131; Flags: Precursor</p> <p>MVLAQGLLSMALLALCWERSLAGAEETIPLQTLRCYNDYTSHITCRWADTQDAQRLVNVTLIRRVEDLL EPVSCDLSDDMPWSACPHPRCVPRRCVIPCQSFVVTDVDYFSFQDRPLGTRLTVTLTQHVPPEPRDIQ ISTDQDHFL TWSVALGSPQSHWLSPGDLEFEVVYKRLQD SWEDAAIILSNTSQATLGPEHLMPSSTYVA RVRTRLAPGSRLSGRPSKWSFEVCWDSQPGDEAQPNLECFDGA AVLSCSWEVRKEVAS SVSFGFLYK SPDAGEECS PVLREGLGSLHTRHHCQIPV PDPATHGQYI VSVQPRRAEK HIKSSVNIQM APPSLNVTKD</p>                                                                                                                                                                                                                                                                                                                                                                                                                                                                                                                                                                                                                                                                                                                                                                                                                                                                                                                                                                                                                                                                                                                                                                                                                                                                                                                                                                                                                                                                                                                                                                                                                                                                                                                                                                                                                                                                                                                                                                                                                                                                                                                                                                                                                                                                                                                                                                                                                                                                                                                                                                                                                                                                                                                                                    |  |



|                                                                                                                                                                                                                                                                                                                                                                                                                                                                                                                                                                                                                                                                                                                                                                                                                                                                                                                                                                                                                                                                                                                                                                                                                                                                                                                                                                                                                                                                                                                                                                                                                                                                                                                                                                                                                                                                                                                                                                                                                                                                                                                                                                                                                                                                                                                                                                                                                                                                                                                                                                                                                                                                                                                                                                                                                                                                                 |  |
|---------------------------------------------------------------------------------------------------------------------------------------------------------------------------------------------------------------------------------------------------------------------------------------------------------------------------------------------------------------------------------------------------------------------------------------------------------------------------------------------------------------------------------------------------------------------------------------------------------------------------------------------------------------------------------------------------------------------------------------------------------------------------------------------------------------------------------------------------------------------------------------------------------------------------------------------------------------------------------------------------------------------------------------------------------------------------------------------------------------------------------------------------------------------------------------------------------------------------------------------------------------------------------------------------------------------------------------------------------------------------------------------------------------------------------------------------------------------------------------------------------------------------------------------------------------------------------------------------------------------------------------------------------------------------------------------------------------------------------------------------------------------------------------------------------------------------------------------------------------------------------------------------------------------------------------------------------------------------------------------------------------------------------------------------------------------------------------------------------------------------------------------------------------------------------------------------------------------------------------------------------------------------------------------------------------------------------------------------------------------------------------------------------------------------------------------------------------------------------------------------------------------------------------------------------------------------------------------------------------------------------------------------------------------------------------------------------------------------------------------------------------------------------------------------------------------------------------------------------------------------------|--|
| <p>GDSYSLRWETMKMRYEHIDHTFEIQYRKDTATWKDSKTETLQNAHSMALPALEPSTRYWARVVRVTSRTG<br/>YNGIWSEWSEARSWDTESVLPMMVLLALIVIFLTIAVLLALRFVCGIYGYRLRRKWEKIPNPSKSHLRFQNG<br/>SAELWPPGSMASFTSGSPHQPWGSFRFPELEGVFPVPGFGDSEVSLTIEDPKHVCDDPPSGPDTTAAASD<br/>LPTEQPSPQPGPPAASHTPEKQASSFDFNGPYLGPPhSRSLPDI LGQPEPPQEGGSQKSPPPGSLLEYLC<br/>LPAGGQVQLVPLAQAMGPGQAVEVERRPSQGAAGSPSLESGGGPAPALGPRVGGQDQKDSFVAI PMSSG<br/>DTEDEPGVASGYVSSADLVFTPNSSGASSVSLVPSLGLPSDQTPSLCPLGASPPGAPGVPKSGFEGYVELP<br/>PIEGRSPRSPRNNPVPPEAKSPVLNPGERPADVSTSPQPEGLLVQQVGDYCFPLPGLGPGPLSLRSKPS<br/>SPGPGPEIKNLDQAFQVKKPPGQAVPQVPIQLFKALKQQDYLSLPPWEVNKPGEVC</p> <p><b>Notes</b><br/>PPHSRpS<sup>585</sup>LP (Ser601). Defects in CSF2RB are a cause of congenital pulmonary alveolar proteinosis (PAP)<br/>[MIM:265120]. PAP is an autosomal recessive fatal respiratory disease.</p> <p><b>References to 14-3-3 binding to <math>\beta</math>-Chain of GM-CSF/IL-3/IL-5 receptors</b><br/>Stomski FC, Dottore M, Winnall W, Guthridge MA, Woodcock J, Bagley CJ, Thomas DT, Andrews RK, Berndt<br/>MC, Lopez AF. Identification of a 14-3-3 binding sequence in the common beta chain of the granulocyte-<br/>macrophage colony-stimulating factor (GM-CSF), interleukin-3 (IL-3), and IL-5 receptors that is serine-<br/>phosphorylated by GM-CSF. <i>Blood</i>. 1999 Sep 15;94(6):1933-42.</p>                                                                                                                                                                                                                                                                                                                                                                                                                                                                                                                                                                                                                                                                                                                                                                                                                                                                                                                                                                                                                                                                                                                                                                                                                                                                                                                                                                                                                                                                                                                               |  |
| <p><b>Human CTNNB1</b> Catenin beta-1 (Beta-catenin) (Swissprot = P35222)</p> <p>1 MATQADLMEL DMAMEPDRKA AVSHWQQQSY LDSGIHSGAT TTAPSLSGKG NPEEEDVDTS<br/>61 QVLYEWEQGF SQSFTQEQVA DIDGQYAMTR AQRVRAAMFP ETLDEGMQIP STQFDDAAHPT<br/>121 NVQRLAEPSP MLKHAVVNLI NYQDDAELAT RAIPELTKLL NDEDQVVVNK AAVMVHQLSK<br/>181 KEASRHAIMR SPQMVSAIVR TMQNTNDVET ARCTAGTLHN LSHHREGLLA IFKSGGIPAL<br/>241 VKMLGSPVDS VLFYAITTLH NLLHHEGAK MAVRLAGGLQ KMVALLNKTN VKFLAITTDC<br/>301 LQILAYGNQE SKLII LASGG PQALVNIMRT YTYEKLLWTT SRVLKVLVSV SSKNPAIVEA<br/>361 GGQALGHL TDPQRLVQN CLWTLRNLSD AATKQEGMEG LLGTLVQLLG SDDINNVVTC<br/>421 AGILSNLTCN NYKNKMMVCQ VGGIEALVRT VLRAGDREDI TEPAICALRH LTRHQEAEM<br/>481 AQNAVRLHYG LPVVVKLLHP PSHWPLIKAT VGLIRNLALC PANHAPLREQ GAIPRLVQLL<br/>541 VRAHQDTQRR TSMGGTQQQF VEGVRMEEIV EGCTGALHIL ARDVHNRIVI RGLNTIPLFV<br/>601 QLLYSPIENI QRVAAGVLCE LAQDKEAAEA IEAEGATAPL TELLSHRNEG VATYAAAVLF<br/>661 RMSEDKPQDY KKRLSVELTS SLFRTEPMAW NETADLGLDI GAQGEPLGYR QDDPSYRSFH<br/>721 SGGYGQDALG MDPMEHEMG GHHPGADYPV DGLPDLGHAQ DLMGDGLPPGD SNQLAWFDTD<br/>781 L</p> <p>&gt;gi 461854 sp P35222.1 CTNB1_HUMAN RecName: Full=Catenin beta-1; AltName:<br/>Full=Beta-catenin<br/>MATQADLMELDMAMEPDRKAAVSHWQQQSYLDSGIHSGATTTAPSLSGKGNPEEEDVDTSQVLYEWEQGF<br/>SQSFTQEQVADIDGQYAMTRAQVRRAAMFPETLDEGMQIPSTQFDDAAHPTNVQRLAEPSPMLKHAVVNLI<br/>NYQDDAELATRAIPELTKLLNDEDQVVVNKAAMVMHQLSKKEASRHAIMRSPQMVSAIVR TMQNTNDVET<br/>ARCTAGTLHNL SHHREGLLAIFKSGGIPALVKMLGSPVDSVLFYAITTLHNLHHEGAKMAVRLAGGLQ<br/>KMVALLNKTNVKFLAITTDC LQILAYGNQESKLIILASGGPQALVNIMRTYTYEKLLWTTSRVLKVLVSV<br/>SSKNPAIVEAEGGMQALGHLTDPQRLVQNCLWTLRNLSDAATKQEGMEGLLGLTLVQLLGSDDINNVVTC<br/>AGILSNLTCNNYKNKMMVCQVGGIEALVRTVLRAGDREDITEPAICALRHLSHRQEAEMQNAVRLHYG<br/>LPVVVKLLHPPSHWPLIKATVGLIRNLALCPANHAPLREQGAIPRLVQLL VRAHQDTQRR TSMGGTQQQF<br/>VEGVRMEEIVEGCTGALHILARDVHNRIVIRGLNTIPLFVQLLYSPIENIQRVAAGVLCELAQDKEAAEA<br/>IEAEGATAPL TELLSHRNEGVATYAAAVLFRMSEDKPQDYKKRLSVELTS SLFRTEPMAWNETADLGLDI<br/>GAQGEPLGYRQDDPSYRSFHSGGYGQDALGMDPMEHEMGGHHPGADYVPDGLPDLGHAQDLMGDGLPPGD<br/>SNQLAWFDTDL</p> <p><b>Notes</b><br/>AKT phosphorylates beta-catenin at Ser552 and enhances its interaction with 14-3-3zeta.</p> <p><b>References to 14-3-3-binding to beta-catenin</b><br/>Fang D, Hawke D, Zheng Y, Xia Y, Meisenhelder J, Nika H, Mills GB, Kobayashi R, Hunter T, Lu Z.<br/>Phosphorylation of beta-catenin by AKT promotes beta-catenin transcriptional activity. <i>J Biol Chem</i>. 2007 Apr<br/>13;282(15):11221-9.<br/>Takemaru K, Fischer V, Li FQ. Fine-tuning of nuclear-catenin by Chibby and 14-3-3. <i>Cell Cycle</i>. 2009 Jan<br/>15;8(2):210-3.<br/>Li FQ, Mofunanya A, Harris K, Takemaru K. Chibby cooperates with 14-3-3 to regulate <math>\beta</math>-catenin subcellular<br/>distribution and signaling activity. <i>J Cell Biol</i>. 2008 June 30; 181(7): 1141–1154.</p> |  |
| <p><b>Human Cx43</b> connexin43 (Swissprot = P17302)</p> <p>1 MGDWSALGKLLDKVQAYSTA GKGVWLSVLF IFRILLGTA VESAWGDEQS AFRCNTQQPG<br/>61 CENVCYDKSF PISHVRFWVL QIIFVSVPTL LYLAHVYVM RKEEKLKKE EELKVAQTDG<br/>121 VNVDMHLKQI EIKKFKYIE EHGKVKMRGG LLRTYIISIL FKSIFEVAFV LIQWYIYGFV<br/>181 LSAYVTCKRD PCPHQVDCFL SRPTEKTIFI IFMLVSVLVS LALNIEELFY VFFKGVKDRV<br/>241 KKGSDPYHAT SGALSAPKDC GSQKYAYFNG CSSPTAPLSP MSPPGYKLVG GDRNNSCRN<br/>301 YNKQASEQNW ANYSAEQNRM GQAGSTISNS HAQPFDFPDD NQNSKKLAAG HELQPLAIVD<br/>361 QRPSSRASSR ASSRPRPDDL EI</p> <p>&gt;gi 117706 sp P17302.2 CX43_HUMAN RecName: Full=Gap junction alpha-1 protein;<br/>AltName: Full=Connexin-43; Short=Cx43; AltName: Full=Gap junction 43 kDa<br/>heart protein<br/>MGDWSALGKLLDKVQAYSTAGGKGVWLSVLFIFRILLGTAVESAWGDEQS AFRCNTQQPGCENVCYDKSF<br/>PISHVRFWVLQIIFVSVPTLLYLAHVYVMRKEEKLKKEEELKVAQTDG VNVDMHLKQIEIKKFKYIE<br/>EHGKVKMRGGLRTYIISILFKSIFEVAFVLIQWYIYGFVLSAVYTKRDRPCPHQVDCFLSRPTEKTIFI<br/>IFMLVSVLVS LALNIEELFYVFFKGVKDRVKGKSDPYHATSGALSAPKDCGSQKYAYFNGCSSPTAPLSP<br/>MSPPGYKLVGDRNNSCRN YNKQASEQNWANYSAEQNRMGQAGSTISNSHAQPFDFPDDNQNSKKLAAG<br/>HELQPLAIVDQRPSSRASSRASSRPRPDDL EI</p> <p><b>Notes</b><br/>Hexamers of connexin-43 form connexons, which form gap junctions. 14-3-3s are reported to bind to Akt-<br/>phosphorylated Ser373 in the cytoplasmic tail of Cx43 on Ser373, and GST-14-3-3 binds to Cx43 phosphorylated<br/>endogenously in EGF-treated cells (but Ser373 is not a conventional PKB consensus site).</p>                                                                                                                                                                                                                                                                                                                                                                                                                                                                                                                                                                                                                                                                                                                                                                                                                                                                                                                                                                                                                                                                                                                                                                                                                                                                                                                                                                  |  |

**References to 14-3-3 binding to connexin43**

Majoul IV, Onichtchouk D, Butkevich E, Wenzel D, Chailakhyan LM, Duden R. Limiting transport steps and novel interactions of Connexin-43 along the secretory pathway. *Histochem Cell Biol.* 2009 Jul 22.  
Park DJ, Wallick CJ, Martyn KD, Lau AF, Jin C, Warn-Cramer BJ. Akt phosphorylates Connexin43 on Ser373, a "mode-1" binding site for 14-3-3. *Cell Commun Adhes.* 2007 Sep-Oct;14(5):211-26.  
Park DJ, Freitas TA, Wallick CJ, Guyette CV, Warn-Cramer BJ. Molecular dynamics and in vitro analysis of Connexin43: A new 14-3-3 mode-1 interacting protein. *Protein Sci.* 2006 Oct;15(10):2344-55.

**Human DAB2IP** Disabled homolog 2-interacting protein aka AIP1 ASK1-interacting protein 1 (Ras-GAP)

(Swissprot = Q5VWQ8)  
1 MSAGGSARKS TGRSSYYYRL LRRPRLQRQR SRSRSRTRPA RESPQERPGS RRSLPGSLSE  
61 KSPSPMEPSAA TPFVRTGFLS RRLKGSIKRT KSQPKLDRNH SFRHILPGFR SAAAAAADNE  
121 RSHLMPRLKE SRSHESSLSP SSAVEALDLS MEEEVVIKPV HSSILGQDYC FEVTTSSGSK  
181 CFSCRSAAER DKWMENLRA VHPNKDNSRR VEHLKLWVI EAKDLPKAKK YLCELCLDDV  
241 LYARTGKGLK TDNVFVGEHF EFHNLPLLRT VVHLYRETD KKKKKERNYS LGLVSLPAAS  
301 VAGRQFVEKW YPVVTPNPKG GKGPGPMIRI KARYQTITIL PMEMYKEFAE HITNHYLGLC  
361 AALEPILSAK TKEEMASALV HILQSTGKVK DFLTDLMMSE VDRCGDNEHL IFRENTLATAK  
421 AIEEYLKLVG QKYLQDALGE FIKALYESDE NCEVDPSKCS AADLPEHQGN LKMCCELAFK  
481 KIINSYCVFP RELKEVFASW RQECSSRGRP DISERLISAS LFLRFLCPAI MSPSLFNLLQ  
541 EYPDDRTART LTLIAKVTON LANFAKFGSK EYMSFMNQF LEHEWTNMQR FLLEISNPET  
601 LSNLTAAGFEGY IDLGRELSL HSLLWEAVSQ LEQSVSKLGL PLPRILRDVH TALSTPGSGQ  
661 LPGTNDLAST PGSGSSSISA GLQKVIEND LSGLIDFTRL PSPTPENKDL FVTRSSGVQ  
721 PSPARSSSYS EANEPDLQMA NGKSLSMVD LQDARTLDGE AGSPAGPDVL PTDGQAAAAQ  
781 LVAGWPARAT PVNLAGLATV RRAGQTPTTP GTSEGAPGR QLLAPLSFQN PVYQMAAGLP  
841 LSPRGLGDSG SEGHSSLSH SNEELAAAA KLSGFSTAAE ELARRPGELA RRQMSLTEKG  
901 GQPTVPRQNS AGPQRRIDQP PVPVPPPPA PRGRTPPNLL STLQYPRPSS GTLASASPDW  
961 VGPSTRLRQQ SSSKGDSP LKPRAVHKQG PSPVSPNALD RTAAWLLTMN AQLLEDEGLG  
1021 PDPHRDLRL SKDELSQAEK DLAVLQDKLR ISTKKLEEY TLFKQCEETT QKLVLEYQAR  
1081 LEEGEEERLRR QQEDKDIQMK GIISRLMSVE EELKDHAE M QAAVDSKQKI IDAQEKRIAS  
1141 LDAANARLMS ALTQLKERY S MQARNGISPT NPTKLQITEN GEFRNSSNC

>GI|116247768|sp|Q5VWQ8.2|DAB2P\_HUMAN RecName: FULL=DISABLED HOMOLOG 2-INTERACTING PROTEIN; SHORT=DAB2-INTERACTING PROTEIN; ALTNAME: FULL=ASK-INTERACTING PROTEIN 1

MSAGGSARKSTGRSSYYYRLRRPRLQRQR SRSRSRTRPARESPQERPGSRRSLPGSLSEKSPSPMEPSAA  
TPFVRTGFLSRRRLKGSIKRTKSQPKLDRNHSFRHILPGFRSAAAAAADNERSHLMPLRKE SRSHESSLSP  
SSAVEALDLSMEEEVVIKPVHSSILGQDYCFEVTSSGSKCFSCRSAAERDKWMENLRAVHPNKDNSRR  
VEHLKLWVIEAKDLPKAKKYLCELCLDDVLYARTGKGLKTDNVFVGEHF EFHNLPLLRTVTVHLYRETD  
KKKKERNYSY LGLVSLPAASVAGRQFVEKWYPVVTPNPKGGKPGPMIRIKARYQTITILPMEYKEFAE  
HITNHYLGLCAALEPILSAKTKEEMASALVHILQSTGKVKDFLTDLMMSEVDRCGDNEHLIFRENTLATAK  
AIEEYLKLVGQKYLQDALGEFIKALYESDENCEVDPSKCSAADLPEHQGNLKMCCCELAFCKIINSYCVFP  
RELKEVFASWRQECSSRGRPDISERLISASLFLRFLCPAISMPSLFNLLQYEPDDRTARTLTLIAKVTON  
LANFAKFGSK EYMSFMNQFLEHEWTNMQRFLLEISNPETLSNLTAGFEGYIDLGRELSLHSLLWEAVSQ  
LEQSVSKLGLPLPRILRDVHTALSTPGSGQLPGTNDLASTPGSGSSSISAGLQKVIENDLSGLIDFTRL  
PSPTPENKDLFFVTRSSGVQPSPARSSSYS EANEPDLQMANGKSLSMVDLQDARTLDGEAGSPAGPDVL  
PTDGQAAAAQLVAGWPARATPVNLAGLATVRRAGQTPTTPGTSEGAPGRQLLAPLSFQNPVYQMAAGLP  
LSPRGLGDSGSEGHSSLSHSNSEEELAAAAKLSGFSTAAEELARRPGELARRQMSLTEKGGQPTVPRQNS  
AGPQRRIDQPVPVPPPPA PRGRTPPNLLSTLQYPRPSSGTLASASPDWVGPSTRLRQQSSSSKGDSP  
LKPRAVHKQGPSPVSPNALDRTAAWLLTMNAQLLEDEGLGDPDHRDLRLSKDELSQAEKDLAVLQDKLR  
ISTKKLEEYETLFKQCEETTQKLVLEYQARLEEGEERLRRQQEDKDIQMKGIISRLMSVEEELKDHAE M  
QAAVDSKQKI IDAQEKRIASLDAANARLMSALTQLKERYSMQARNGISPTNPTKLQITENGEFRNSSNC

**Notes**

Authors report that mutation of Ser604 in GenBank accession no. AY032952 prevents 14-3-3 binding = Ser728 in Q5VWQ8 as shown.

**References to 14-3-3 binding to AIP1**

Zhang H, Zhang H, Lin Y, Li J, Poher JS, Min W. RIP1-mediated AIP1 phosphorylation at a 14-3-3-binding site is critical for tumor necrosis factor-induced ASK1-JNK/p38 activation. *J Biol Chem.* 2007 May 18;282(20):14788-96.  
Min W, Lin Y, Tang S, Yu L, Zhang H, Wan T, Luhn T, Fu H, Chen H. AIP1 recruits phosphatase PP2A to ASK1 in tumor necrosis factor-induced ASK1-JNK activation. *Circ Res.* 2008 Apr 11;102(7):840-8.  
Zhang R, He X, Liu W, Lu M, Hsieh JT, Min W. AIP1 mediates TNF-alpha-induced ASK1 activation by facilitating dissociation of ASK1 from its inhibitor 14-3-3. *J Clin Invest.* 2003 Jun;111(12):1933-43.  
Li X, Zhang R, Luo D, Park SJ, Wang Q, Kim Y, Min W. Tumor necrosis factor alpha-induced desumoylation and cytoplasmic translocation of homeodomain-interacting protein kinase 1 are critical for apoptosis signal-regulating kinase 1-JNK/p38 activation. *J Biol Chem.* 2005 Apr 15;280(15):15061-70.

**Human DDT4** DNA-damage-inducible transcript 4 protein (Redd1) (Swissprot = Q9NX09)

1 MPSSLWDRFSS SSTSSPSSL PRTPPDRPP RSAWGSATRE EGFDRSTLS SSDCESLDSS  
61 NSGFGPEEDT AYLDGVSLPD FELLSDPEDE HLCANLMQLL QESLAQARLG SRRPARLLMP  
121 SQLVSVQVKE LLRLAYS EPC GLRGALLDVC VEQKGSCHSV GQLALDPSLV PTFQLTLVLR  
181 LDSRLWPKIQ GLFSSANS PF LPGFSQSLTL STGFRVIKKK LYSSEQLLIE EC  
>gi|74753036|sp|Q9NX09.1|DDT4\_HUMAN RecName: Full=DNA-damage-inducible transcript 4 protein; AltName: Full=Protein regulated in development and DNA damage response 1; Short=REDD-1; AltName: Full=HIF-1 responsive protein  
RTP801  
MPSSLWDRFSSSSTSSPSSLPRTPPDRPPRSAWGSATREEGFDRSTLS SSDCESLDSSNSGFGPEEDT  
AYLDGVSLPDFELLSDPEDEHLCANLMQLLQESLAQARLGSRRPARLLMPSQLVSVQVKE LLRLAYS EPC  
GLRGALLDVCVEQKGSCHSVGQLALDPSLVPTFQLTLVLR LDSRLWPKIQGLFSSANS PF LPGFSQSLTL  
STGFRVIKKKLYSSEQLLIEEC

|                                                                                                                                                                                                                                                                                                                                                                                                                                                                                                                                                                                                                                                                                                                                                                                                                                                                                                                                                                                                                                                                                                                                                                                                                                                                                                                                                                                                                                                                                                                                                                                                                                                                                                                                                                                                                                                                                                                                                                                                                                                                                                                                                                                                                                                                                                                                                                                                                                                                                                                                                                                                                                                                                                                                                                                                                                                                                                                                                                                                                                                                                                                                                                                                                                                                                                                                      |                                                                                                  |
|--------------------------------------------------------------------------------------------------------------------------------------------------------------------------------------------------------------------------------------------------------------------------------------------------------------------------------------------------------------------------------------------------------------------------------------------------------------------------------------------------------------------------------------------------------------------------------------------------------------------------------------------------------------------------------------------------------------------------------------------------------------------------------------------------------------------------------------------------------------------------------------------------------------------------------------------------------------------------------------------------------------------------------------------------------------------------------------------------------------------------------------------------------------------------------------------------------------------------------------------------------------------------------------------------------------------------------------------------------------------------------------------------------------------------------------------------------------------------------------------------------------------------------------------------------------------------------------------------------------------------------------------------------------------------------------------------------------------------------------------------------------------------------------------------------------------------------------------------------------------------------------------------------------------------------------------------------------------------------------------------------------------------------------------------------------------------------------------------------------------------------------------------------------------------------------------------------------------------------------------------------------------------------------------------------------------------------------------------------------------------------------------------------------------------------------------------------------------------------------------------------------------------------------------------------------------------------------------------------------------------------------------------------------------------------------------------------------------------------------------------------------------------------------------------------------------------------------------------------------------------------------------------------------------------------------------------------------------------------------------------------------------------------------------------------------------------------------------------------------------------------------------------------------------------------------------------------------------------------------------------------------------------------------------------------------------------------------|--------------------------------------------------------------------------------------------------|
| <p><b>Human DDIT4L</b> DNA-damage-inducible transcript 4-like protein (Redd2) (Swissprot = Q96D03)</p> <p>1 MVATGSLSSK NPASISELLD CGYHPESLLS DFDYWDYVVP EPNLNEVIFE ESTCQNLVKM<br/> 61 LENCLSKSKQ TKLGCSSKLV PEKLTQRIAQ DVLRLSSSEP CGLRGCVMHV NLEIENVCKK<br/> 121 LDRIVCDSVV VPTFELTLVF KQENCSWTSF RDIFFSRGRF SSGFRRTLIL SSGFRLVKKK<br/> 181 LYSLIGTTVI EGS</p> <p>&gt;gi 74731396 sp Q96D03.1 DDT4L HUMAN RecName: Full=DNA-damage-inducible transcript 4-like protein; AltName: Full=Protein regulated in development and DNA damage response 2; Short=REDD-2; AltName: Full=HIF-1 responsive protein RTP801-like</p> <p>MVATGSLSSKNPASISELLDCGYHPESLLSDFDYWDYVVP EPNLNEVIFEESTCQNLVKM LENCLSKSKQ TKLGCSSKLVPEKLTQRIAQDVLRLSSSTEP CGLRGCVMHV NLEIENVCKKLDRIVCDSVVPTFELTLVF KQENCSWTSFRDIFFSRGRFSSSGFRRTLILSSSGFRLVKKKLYSLIGTTVIEGS</p> <p><b>Notes</b><br/> Motif scanning within this domain revealed a consensus Arg-X-X-X-Ser/Thr-X-Pro-binding site for 14-3-3 proteins that is conserved among mammalian orthologs of both REDD1 and the REDD1-related protein REDD2. Of note, both Drosophila REDD1 orthologs harbor a variant of this motif with the serine residue at the +2 position relative to arginine (Arg-X-Ser-X-X-X-Pro).<br/> hREDD1 RLAY(S)EP<br/> mREDD1 RLAY(S)EP<br/> hREDD2 RLSS(T)EP<br/> mREDD2 RLSS(T)EP</p> <p><b>References to 14-3-3 binding to Redd1</b><br/> DeYoung MP, Horak P, Sofer A, Sgroi D, Ellisen LW. Hypoxia regulates TSC1/2-mTOR signaling and tumor suppression through REDD1-mediated 14-3-3 shuttling. <i>Genes Dev.</i> 2008 Jan 15;22(2):239-51.</p> <p><b>References to 14-3-3 binding to Redd2 (SMHS1/RTP801L/DDIT4L)</b><br/> Miyazaki M, Esser KA. REDD2 is enriched in skeletal muscle and inhibits mTOR signaling in response to leucine and stretch. <i>Am J Physiol Cell Physiol.</i> 2009 Mar;296(3):C583-</p>                                                                                                                                                                                                                                                                                                                                                                                                                                                                                                                                                                                                                                                                                                                                                                                                                                                                                                                                                                                                                                                                                                                                                                                                                                                                                                                                                                                                                                                             |                                                                                                  |
| <p><b>Human DYRK1A</b> Dual-specificity tyrosine-phosphorylated and regulated kinase (Swissprot = Q13627)</p> <p>1 MHTGGETSAC KPSSVRLAPS FSFHAAGLQM AGQMPHSHQY SDRRQPNISD QQVSALSYSYD<br/> 61 QIQQLPTNQV MPDIVMLQRR MPQTFRDPAT APLRKLSDVL IKTYKHINEV YYAKKRRRHQ<br/> 121 QQQGDDSSHK KERKVVNDGY DDDNYDYIVK NGEKWMRDYE IDSLIGKGSF GQVVKAYDRV<br/> 181 EQEWVAIKII KNKKAFLNQA QIEVRLLLELM NKHDTMKEY YIVHLKRHFMP RNHLCLVFEM<br/> 241 LSYNLYDLLR NTNFRGVSLN LTRKFAQQMC TALLFLATPE LSIHCDLKP ENILLCNPKR<br/> 301 SAIKIVDFGS SCQLGQRIYQ YIQSRFYRSP EVLLGMPYDL AIDMWSLGI LVEMHTGEPL<br/> 361 FSGANEVDQM NKIVEVLGIP PAHILDQAPK ARKFFEKLPD GTWNLKTKD GKREYKPPGT<br/> 421 RKLHNLGVE TGGPGGRRAG ESGHTVADYL KFKDLILRML DYDPKTRIQP YYALQHSFFK<br/> 481 KTADEGTNTS NSVSTSPAME QSQSSGTTSS TSSSSGGSSG TSNSGRARSD PTHQHRHSGG<br/> 541 HFTAAVQAMD CETHSPQVRQ QFPAPLGWSG TEAPTQVTVE THPVQETTFH VAPQQNALHH<br/> 601 HHGNSSHHHH HHHHHHHHGG QQALGNRTRP RVYNSPTNSS STQDSMEVGH SHHSMTSLSS<br/> 661 STSSSTSSS STGNQGNQAY QNRPVAANTL DFGQNGAMDV NLTVYSNPRQ ETGIAGHPY<br/> 721 QFSANTGPAH YMTEGHLTMR QGADREESPM TGVCVQQSPV ASS</p> <p>&gt;gi 3219996 sp Q13627.2 DYR1A_HUMAN RecName: Full=Dual specificity tyrosine-phosphorylation-regulated kinase 1A; AltName: Full=Protein kinase minibrain homolog; Short=MNBH; Short=hMNB; AltName: Full=HP86; AltName: Full=Dual specificity YAK1-related kinase</p> <p>MHTGGETSACKPSSVRLAPSF SFHAAGLQMAGQMPHSHQYSDRRQPNISDQQVSALSYSYDQIQQLPTNQV MPDIVMLQRRMPQTFRDPATAPLRKLSVDLIKTYKHINEVYYAKKRRRHQQQGQDDSSHKKERKVVNDGY DDDNYDYIVKNGEKWMRDYEIDSLIGKGSFGQVVKAYDRVEQEWVAIKIIKNKKAFLNQAQIEVRLLLELM NKHDTMKEYYIVHLKRHFMRNHLCLVFEMLSYNLYDLLRNTNFRGVSLNLTRKFAQQMCTALLFLATPE LSIHCDLKPENILLCNPKRSAIKIVDFGSSCQLGQRIYQYIQSRFYRSP EVLLGMPYDLAIDMWSLGI LVEMHTGEPLFSGANEVDQMNKIVEVLGIPPAHILDQAPKARKFFEKLPDGTWNLKTKDGKREYKPPGT RKLHNLGVEVTGGPGGRRAGESGHTVADYLKFKDLILRMLDYDPKTRIQPYYALQHSFFKTADEGTNTS NSVSTSPAMEQSQSSGTTSSSTSSSGGSSGTSNSGRARSDPTHQHRHSGGHFTAAVQAMDCETHSPQVRQ QFPAPLGWSGTEAPTQVTVE THPVQETTFH VAPQQNALHHHHHHHHHHHHHHHHHHHHGQQALGNRTRP RVYNSPTNSSSTQDSMEVGHSHHSMTSLSSSTSSSTSSSTGNQGNQAYQNRPVAANTLDFGQNGAMDV NLTVYSNPRQETGIAGHPYQFSANTGPAHYMTEGHLTMRQGADREESPMTGVCVQQSPVASS</p> <p><b>Notes</b><br/> DYRK1A autophosphorylates on Ser-520 (RAR(pS520)DP, in the PEST domain of the protein. We also show that phosphorylation of this residue, which we show is subjected to dynamic changes in vivo, mediates the interaction of DYRK1A with 14-3-3beta. A second 14-3-3 binding site is present within the N-terminal of the protein. In the context of the DYRK1A molecule, neither site can act independently of the other. A previous report on 14-3-3 and DYRK1A identified the first 125 amino acids of DYRK1A as the interacting domain, based on the lack of binding of an N-terminal deletion mutant (Kim et al., 2004).</p> <p><b>References to 14-3-3 binding to DYRK1A</b><br/> Alvarez M, Altafaj X, Aranda S, de la Luna S. DYRK1A autophosphorylation on serine residue 520 modulates its kinase activity via 14-3-3 binding. <i>Mol Biol Cell.</i> 2007 Apr;18(4):1167-78.<br/> Kim D, Won J, Shin DW, Kang J, Kim YJ, Choi SY, Hwang MK, Jeong BW, Kim GS, Joe CO, Chung SH, Song WJ. Regulation of Dyrk1A kinase activity by 14-3-3. <i>Biochem Biophys Res Commun.</i> 2004 Oct 15;323(2):499-504.</p> | <p>Controversy about site of 14-3-3-binding. NOT IN WEBLOGO.</p>                                 |
| <p><b>Human ELAYL1</b> (Swissprot = Q15717)</p> <p>1 MSNGYEDHMA EDCRGDIGRT NLIVNYLPQN MTQDELRSLF SSIGEVESAK LIRDKVAGHS<br/> 61 LGYGFVNYVT AKDAERAINL LNGLRLQSKT IKVSYARPSS EVIKDANLYI SGLPRMTMQK<br/> 121 VVEDMFSRFQ RIINSRVLVD QTTGLSRGVA FIRFDKRSEA EEAITSFNGH KPPGSSEPIT<br/> 181 DKFAANPNQN KNVALLSPLY HSPARRFGFP VHQAQRFFP SPMGVDHMSG LSGVNVPGNA<br/> 241 SSGWCIFIYV LGQDADEGIL WQMFPGFPAV TNVKVIRDFN TNKCKGFGFV TMTNYEEAAM<br/> 301 AIASLNGYRL GDKILQVSFK TNKSHK</p>                                                                                                                                                                                                                                                                                                                                                                                                                                                                                                                                                                                                                                                                                                                                                                                                                                                                                                                                                                                                                                                                                                                                                                                                                                                                                                                                                                                                                                                                                                                                                                                                                                                                                                                                                                                                                                                                                                                                                                                                                                                                                                                                                                                                                                                                                                                                                                                                                                                                                                                                                                                                                                                                                                                                                                                                                                                           | <p>Ser202 phosphorylated, but not the 14-3-3-binding site. THEREFORE NOT IN WEBLOGO ANALYSIS</p> |

|                                                                                                                                                                                                                                                                                                                                                                                                                                                                                                                                                                                                                                                                                                                                                                                                                                                                                                                                                                                                                                                                                                                                                                                                                                                                                                                                                                                                                                                                                                                                                                                                                                                                                                                                                                                                                                                                                                                                                                                                                                                                                                                                                                                                                                                                                                                                                              |                                                                                                  |
|--------------------------------------------------------------------------------------------------------------------------------------------------------------------------------------------------------------------------------------------------------------------------------------------------------------------------------------------------------------------------------------------------------------------------------------------------------------------------------------------------------------------------------------------------------------------------------------------------------------------------------------------------------------------------------------------------------------------------------------------------------------------------------------------------------------------------------------------------------------------------------------------------------------------------------------------------------------------------------------------------------------------------------------------------------------------------------------------------------------------------------------------------------------------------------------------------------------------------------------------------------------------------------------------------------------------------------------------------------------------------------------------------------------------------------------------------------------------------------------------------------------------------------------------------------------------------------------------------------------------------------------------------------------------------------------------------------------------------------------------------------------------------------------------------------------------------------------------------------------------------------------------------------------------------------------------------------------------------------------------------------------------------------------------------------------------------------------------------------------------------------------------------------------------------------------------------------------------------------------------------------------------------------------------------------------------------------------------------------------|--------------------------------------------------------------------------------------------------|
| <p>&gt;gi 20981691 sp Q15717.2 ELAV1_HUMAN RecName: Full=ELAV-like protein 1; AltName: Full=Hu-antigen R; Short=HuR<br/> MSNGYEDHMAEDCRGDIGRTNLIVNLPQNMTPQDELRSLSFSSIGEVESAKLIRDKVAGHSGLYGFVNYVT<br/> AKDAERAINTLNGLRLQSKTIKVSYARPSSEVIKDNLYISGLPRTMTQKDVEDMFSRFGRIINSRVLVD<br/> QTTGLSRGVAFIRFKRSEAEAEITSFNGHKPPGSSEPIITVKFAANPNQKNVALLSQLYHSPARFEGGP<br/> VHHQQRFRFSPMGVDHMSGLSGVNVPGNASSGWCIFIIYNLQDQADEGILWQMFPGFVAVTNVVKVIRDFN<br/> TNKCKGFGFVMTNYYEAAAIASLNGYRLGDKILQVSKTKNSHK</p> <p><b>Notes</b><br/> Ser202 phosphorylation occurred at the same time as 14-3-3 binding, but not functionally linked and ELAVL1 binds avidly to the AU-rich element in FOS and IL3/interleukin-3 mRNAs. In the case of the FOS AU-rich element, HUR binds to a core element of 27 nucleotides that contain AUUUA, AUUUUA, and AUUUUUA motifs. Interacts with ANP32A.<br/> Here, we present evidence that HuR phosphorylation at S202 by the G2-phase kinase Cdk1 influences its subcellular distribution. In keeping with the prominently cytoplasmic location of the nonphosphorylatable point mutant HuR(S202A), phospho-HuR(S202) was shown to be predominantly nuclear using a novel anti-phospho-HuR(S202) antibody. The enhanced cytoplasmic presence of unphosphorylated HuR was linked to its decreased association with 14-3-3 and to its heightened binding to target mRNAs.</p> <p><b>References to 14-3-3 binding to ELAVL1</b><br/> Kim HH, Abdelmohsen K, Lal A, Pullmann R Jr, Yang X, Galban S, Srikantan S, Martindale JL, Blethrow J, Shokat KM, Gorospe M. Nuclear HuR accumulation through phosphorylation by Cdk1. <i>Genes Dev.</i> 2008 Jul 1;22(13):1804-15<br/> Kim HH, Gorospe M. Phosphorylated HuR shuttles in cycles. <i>Cell Cycle.</i> 2008 Oct;7(20):3124-6.</p>                                                                                                                                                                                                                                                                                                                                                                                                                                                                                                                                                                    |                                                                                                  |
| <p><b>Human FAM82A2 (PTPIP51)</b> Regulator of microtubule dynamics protein 3 (Protein tyrosine phosphatase-interacting protein 51) (Swissprot = Q96TC7)<br/> 1 MSRLGALGGA RAGLGLLLGT AAGLGFCLL YSQRWKRQR HGRSQSLPNS LDYTQTSDFG<br/> 61 RHVMMLRAVP GGAGDASVLP SLPREGQEKV LDRLDVFLTS LVALRREVEE LRSSLRGLAG<br/> 121 EIVGEVRCHE ENQRVARRR RFPFVREERD STGSSSVYFT ASSGATFTDA ESEGGYTTAN<br/> 181 AESDNERDSD KESEDEGEDEV SCETVKMGRK DSDLDEEEAA SGASSALEAG GSSGLEVDLVP<br/> 241 LLQQADELHR GDEQKREGF QLLLNKLVY GSRQDFLWRL ARAYSDMCEL TEEVSEKKS<br/> 301 ALDGKEEAEA ALEKGDDESAD CHLWYAVLCG QLAEHESIQR RIQSGFSFKE HVDKAIALQP<br/> 361 ENPMAHFLG RWCYQVSHLS WLEKKTATAL LESPLSATVE DALQSFLKAE ELQPGFSKAG<br/> 421 RVYISKCYRE LGKNSEARWW MKLALPELDPV TKEDLAIQKD LEELEVLIRD</p> <p>&gt;gi 147643203 sp Q96TC7.2 RMD3_HUMAN RecName: Full=Regulator of microtubule dynamics protein 3; Short=RMD-3; Short=hRMD-3; AltName: Full=Protein FAM82A2; AltName: Full=Protein FAM82C; AltName: Full=Protein tyrosine phosphatase-interacting protein 51; AltName: Full=TCPTP-interacting protein 51; AltName: Full=Cerebral protein 10<br/> MSRLGALGGARAGLGLLLGTAAGLGFCLL YSQRWKRQRHGRSQSLPNSLDYTQTSDFGPRHVMMLRAVP<br/> GGAGDASVLP SLPREGQEKVLDRLDFVLTSLVALRREVEELRSSLRGLAGEIVGEVRCHEENQRVARRR<br/> RFPFVREERDSTGSSSVYFTASSGATFTDAESEGYYTTANAESDNERDSDKESEDEGEDEVSCETVKMGRK<br/> DSDLDEEEAASGASSALEAGSSGLEVDVLP LLQQADELHRGDEQKREGFQLLLNKLVY GSRQDFLWRL<br/> ARAYSDMCEL TEEVSEKKS YALDGKEEAEAALEKGDDESADCHLWYAVLCG QLAEHESIQRRIQSGFSFKE<br/> HVDKAIALQPENPMAHFLGRWCYQVSHLSWLEKKTATALLSPLSATVEDALQSFLKAEELQPGFSKAG<br/> RVYISKCYRELGNSEARWWMKLALPELDPVTKEDLAIQKDL EELEVLIRD</p> <p><b>Notes</b><br/> Said to be a ternary complex of PTPIP51, 14-3-3, and Raf-1 (Yu et al 2008). Proposed sites are 43RSQ(pS46)LP48, and either 146RER(pS149)DS151 or 148RSD(pS151)TG154.</p> <p><b>References to 14-3-3 binding to PTPIP51</b><br/> Yu C, Han W, Shi T, Lv B, He Q, Zhang Y, Li T, Zhang Y, Song Q, Wang L, Ma D. PTPIP51, a novel 14-3-3 binding protein, regulates cell morphology and motility via Raf-ERK pathway. <i>Cell Signal.</i> 2008 Dec;20(12):2208-20.<br/> Stenzinger A, Schreiner D, Koch P, Hofer HW, Wimmer M. Cell and molecular biology of the novel protein tyrosine-phosphatase-interacting protein 51. <i>Int Rev Cell Mol Biol.</i> 2009;275:183-246.</p> | <p>Only show pSer46 on WEBLOGO. Not sure whether Ser148 or 151 is the potential second site.</p> |
| <p><b>Human FGFR2</b> Fibroblast growth factor receptor 2 (Swissprot = P21802)<br/> 1 MVSWGRFICL VVVTMATLSL ARPSFSLVED TLEPEEPPT KYQISQPEVY VAAPGESLEV<br/> 61 RCLLKDAAVI SWTKDGVHLG PNNRTVLIGE YLQIKGATPR DSGLYACTAS RTVDSETWYF<br/> 121 MVNVTDAISS GDEDDTDGA EDFVSENSNN KRAPYWTNTE KMEKRLHAVP AANTVKFRCP<br/> 181 AGGNPMPMTMR WLKNGKEFKQ EHRIGGYKVR NQHWSLIMES VVPSDKGNYT CVVENEYGSI<br/> 241 NHTYHLDVVE RSPHRPILQA GLPANASTVV GGDVEFVCKV YSDAQPHIQW IKHVEKNGSK<br/> 301 YGPDGLPYLK VLKAAGVNTT DKEIEVLYIR NVTEDAGEY TCLAGNSIGI SFHSAWLTVL<br/> 361 PAPGREKEIT ASPDYLEIAI YCIGVFLIAC MVVTVILCRM KNTTKKPDFS SQPAVHKLTK<br/> 421 RIPLRRQVTV SAESSSSMNS NTPLVIRITR LSSTADTPML AGVSEYELPE DPKWEFPRDK<br/> 481 LTLGKPLGEG CFGQVVMMAEA VGDIDKDKPE AVTVAVKMLK DDATEKDLSD LVSEMEMMKM<br/> 541 IGKHKNIINL LGACTQDGPL YVIVEYASKG NLREYLRRAR PPGMEYSYDI NRVPEEQMTF<br/> 601 KDLVSTYQL ARGMEYLASQ KCIDRLAAR NVLVTENNVM KIADFLGARD INNIDYKKT<br/> 661 TNGRLPVKWM APEALFDRVY THQSDVWSFG VLMWEIFTLG GSPYPGIPVE ELFKLLKEGH<br/> 721 RMDKPANCTN ELYMMRDCW HAVPSQRPTF KQLVEDLDRI LTLTTNEEYL DLSQPLEQYS<br/> 781 PYPDTRSS SSGDDSVFSP DMPYEPCLP QYPHINGSVK T</p> <p>&gt;gi 120049 sp P21802.1 FGFR2_HUMAN RecName: Full=Fibroblast growth factor receptor 2; Short=FGFR-2; AltName: Full=Keratinocyte growth factor receptor 2; AltName: CD_antigen=CD332; Flags: Precursor<br/> MVSWGRFICLVVVTMATLSLARPSFSLVEDTLEPEEPPTKYQISQPEVYVAAPGESLEVRCLLKDAAVI<br/> SWTKDGVHLGPNNTVLTIGEYLQIKGATPRDSGLYACTASRTVDSETWYFMVNVTDAISSGDEDDTDGA<br/> EDFVSENSNNKRAPYWTNTEKMEKRLHAVPAANTVKFRCPAGGNPMPMTMRWLKNGKEFKQEHRIGGYKVR<br/> NQHWSLIMESVVPSDKGNYTCVVENEYGSINHTYHLDVVERSHPHRPILQAGLPANASTVVGGDVEFVCKV<br/> YSDAQPHIQWIKHVEKNGSKYGPDGLPYLKVLKAAGVNTT DKEIEVLYIRNVTEDAGEYTCLAGNSIGI</p>                                                                                                                                                                                                                                                                                                                                                                                                                                                                                                                                                                                                     |                                                                                                  |

SFHSAWLTVLPAPGREKEITASPDYLEIAIYCIGVFLIACMVVTVILCRMKNTTKKPDFSSQPAVHKLTK  
 R1PLRRQVTVSAESSSSMNSNTPLVRITRRLSSTADT PMLAGVSEYELPEDPKWEFPRDKLTLGKPLGEG  
 CFGQVVMAEAVGIDKDKPKAEAVTVAVKMLKDDATEKDLSDLVSEMEMMKMIGKHKNIINLLGACTQDGPL  
 YVIVEYASKGNLREYLRRARPPGMEYSYDINRVPEEQMTFKDLVSCYQLARGMEYLASQKCIHRDLAAR  
 NVLVTENNVMKIADFGIARDINNI DYKKTNGRLPVKWMPEALFDRVYTHQSDVWSFGVLMWEIFTLG  
 GSPYPGIPVEELFKLLKEGHRMDK PANCTNELYMMRDCWHAVPSQRPTFKQLVEDLDRILTLTTNTEEYL  
 DLSQPLEQYSPSPYDTRSSCSGSDSVFSPDMPYEPCLPQYPHINGSVKT

**Notes**

"FGFR2 is phosphorylated on serine 779 (KEQYSP(pS779)YPDTRC) in response to FGF2. S779, which lies adjacent to the phospholipase C gamma binding site at Y766, provides a docking site for the 14-3-3 phosphoserine-binding proteins and is essential for the full activation of the phosphatidylinositol 3-kinase and Ras/mitogen-activated protein kinase pathways" (Lonic et al 2008). Ser779 signaling is essential for promoting cell survival and proliferation in both Ba/F3 cells and BALB/c 3T3 fibroblasts.

Ser776 is conserved across mammalian species in both FGFR2 and FGFR1, and similar sites in other receptors (Lonic et al 2008).

|                                                            |                                                                                                                                                                     |                                                                          |           |
|------------------------------------------------------------|---------------------------------------------------------------------------------------------------------------------------------------------------------------------|--------------------------------------------------------------------------|-----------|
| FGFR2 (Bek)                                                | 763                                                                                                                                                                 | NEE <b>Y</b> LLSQPLE.....QYSP <b>S</b> YP                                | P21802    |
| GM-CSF/IL-3/IL-5 receptor $\beta$ subunit c                | 590                                                                                                                                                                 | NGP <b>Y</b> LGPP.....HSR <b>S</b> LP                                    | NP_000386 |
| FGFR1 (Flg)                                                | 763                                                                                                                                                                 | NQE <b>Y</b> LDLSIPLD.....QYSP <b>S</b> FP                               | P11362    |
| ErbB4                                                      | 1239                                                                                                                                                                | NP <b>D</b> Y.....WNH <b>S</b> LP                                        | NP_005226 |
| Low-density lipoprotein receptor-related protein 1 4470    |                                                                                                                                                                     |                                                                          |           |
| NPT <b>Y</b> KMYEGEGEPDDVGGLLDADFALDPD...KPTN <b>F</b> TNP | Q07954                                                                                                                                                              |                                                                          |           |
| Low-density lipoprotein receptor 802                       | NPV <b>Y</b> QKTTTEDEVHICHN.....QDG <b>Y</b> SYP                                                                                                                    | AAF24515                                                                 |           |
| Very-low-density lipoprotein receptor 834                  | NPV <b>Y</b> LKTTTEEDLSIDIG.....RHS <b>A</b> S <b>V</b> G                                                                                                           | NP_003374                                                                |           |
| Integrin beta 1 (fibronectin receptor)                     | 780                                                                                                                                                                 | N <b>P</b> I <b>Y</b> .....KSA <b>V</b> T <b>I</b> V <b>V</b>            | NP_002202 |
| Integrin beta 3 (platelet glycoprotein IIIa) 770           | N <b>P</b> L <b>Y</b> KEA.....T <b>S</b> T <b>F</b> T <b>I</b> N <b>I</b>                                                                                           | NP_000203                                                                |           |
| Integrin beta-6                                            | 759                                                                                                                                                                 | N <b>P</b> L <b>Y</b> R.....G <b>S</b> T <b>S</b> T <b>F</b> K           | A37057    |
| Integrin beta-7                                            | 775                                                                                                                                                                 | N <b>P</b> L <b>Y</b> K <b>S</b> .....A <b>I</b> T <b>T</b> T <b>I</b> N | P26010    |
| ErbB3                                                      | 972                                                                                                                                                                 | P <b>R</b> Y <b>L</b> V <b>I</b> .....K <b>R</b> E <b>S</b> G <b>P</b>   | P21860    |
| FLT3 receptor tyrosine kinase 916                          | EE <b>I</b> Y <b>I</b> IMQSCWAFDS.....R <b>K</b> R <b>P</b> S <b>F</b> P                                                                                            | CAA81393                                                                 |           |
| Vascular endothelial growth factor receptor 2 1220         | IS <b>Q</b> Y <b>L</b> QNS.....K <b>R</b> K <b>S</b> R <b>P</b>                                                                                                     | AAC16450                                                                 |           |
| Granulocyte colony stimulating factor receptor 764         | P <b>G</b> H <b>Y</b> L.....R <b>D</b> S <b>T</b> Q <b>P</b>                                                                                                        | Q99062                                                                   |           |
| IL-6 receptor beta chain (glycoprotein 130) 764            | H <b>S</b> G <b>Y</b> R <b>H</b> Q <b>V</b> P <b>S</b> V <b>Q</b> V <b>F</b> S.....R <b>E</b> S <b>T</b> Q <b>P</b>                                                 | P40189                                                                   |           |
| TrkB tyrosine kinase (BDNF/NT-3 receptor) 752              | QP <b>W</b> Y <b>Q</b> LSNNEVIECITQGR <b>V</b> L.....Q <b>R</b> PR <b>T</b> CP                                                                                      | Q16620                                                                   |           |
| Platelet-derived growth factor receptor alpha 608          | G <b>T</b> A <b>Y</b> .....G <b>L</b> S <b>R</b> S <b>Q</b> P                                                                                                       | P16234                                                                   |           |
| c-Met 1023                                                 | Q <b>V</b> Q <b>Y</b> PLTDMSPILT <b>S</b> G.....D <b>S</b> D <b>I</b> SS <b>P</b>                                                                                   | P08581                                                                   |           |
| Macrophage-stimulating protein receptor (p185-Ron) 1357    | PAT <b>Y</b> M <b>N</b> L <b>G</b> PS <b>T</b> SH <b>E</b> M <b>N</b> VR <b>P</b> E <b>Q</b> Q <b>F</b> SP <b>M</b> PG <b>N</b> VR <b>R</b> PR <b>L</b> SE <b>P</b> | Q04912                                                                   |           |
| IGF-1R 1278                                                | S <b>F</b> Y <b>Y</b> SEENKLPEPEELDLEPENMESVPLD..P <b>S</b> ASS <b>S</b> SL <b>P</b>                                                                                | NP_000866                                                                |           |

TABLE 1 in Lonic et al (2008) Identification of putative conserved phosphotyrosine/serine motifs in diverse cell surface receptors. The tyrosine and serine residues in boldface in each motif are conserved between at least three species including, human, mouse, and rat.

**References to 14-3-3 binding to FGFR2**

Lonic A, Barry EF, Quach C, Kobe B, Saunders N, Guthridge MA. Fibroblast Growth Factor Receptor 2 Phosphorylation on Serine 779 Couples to 14-3-3 and Regulates Cell Survival and Proliferation. Mol Cell Biol. 2008 May;28(10):3372-85.

**Human FOXO1** Forkhead box protein O1 transcription factor (FKHR) (FOXO1A) (Swissprot = Q12778)

1 MAEAPQVVEI DPDFEPLPRP R**S**C**T**WPLPRP EFSQNSATS SPAPSGSAAA NPDAAGLPS  
 61 ASAAAVSADF MSNLSLLEES EDFPQAPGSV AAATAAAAAA AATGGLCGDF QGPEAGCLHP  
 121 APPQPPPPGP LSQHPPVPPA AAGPLAQPR KSSSSRRNAW GNLSYADLIT KAISSAEKR  
 181 LTL**S**Q**I**Y**E**W**M** V**K**S**V**P**F**K**D**K GDSNSAGWK NSIRHNSLH SKFIRVQNEG TKGSSWMLN  
 241 PEGGKSGKSP RRRAA**S**MDNN SKFAKRSRA AKKASLQSG QEGAGDSPGS QFSKWPASPG  
 301 SHSNDDFDNW STFRPRTSSN ASTISGR**L**SP IMTEQDDLGE GDVHSMVYPP SAAKMASTLP  
 361 SLSEISNPEN MENLLDNLNL LSSPTSLTVS TQSSPGTMMQ QTPCYSFAPP NTSLSNPSPN  
 421 YQKYTYGQSS MSPLQMP**I**Q TLQDNKSSYG GMSQYN**C**APG LLKELLTSDS PPHNDIMTPV  
 481 DPGVAQPN**S**R VLGQNVMMGP NSVMSTYGSQ ASHNKMMNPS SHTHPGHAQQ TSAVNGRPLP  
 541 HTVSTMPHTS GMNRLTQ**V**KT PVQVPLPH**P**M QMSALGGYSS VSSCNGYGRM GLLHQEKLPS  
 601 DLDMFIERL DCDMESI**R**N DLMDGDTLDF NFDNVL**N**Q**S** FPHSVKTTTH SWVSG

>gi|116241368|sp|Q12778.2|FOXO1\_HUMAN RecName: Full=Forkhead box protein O1; AltName: Full=Forkhead box protein O1A; AltName: Full=Forkhead in rhabdomyosarcoma

MAEAPQVVEIDPDFEPLPRP**R**SC**T**WPLPRP**E**FSQNSATS**S**PAPSGSAAA**N**PDAAGLPS**A**ASAAV**S**ADF  
 MSNLSLLE**E**SEDFPQAPGS**V**AAATAAAAA**A**ATGGLCGDF**Q**GPEAGCLHP**A**PPQPPPP**G**PLSQHPPVPPA  
 AAGPLAQPR**K**SSSSRRNAWGNLSYADLIT**K**AISSAEKR**L**TL**S**Q**I**Y**E**W**M**V**K**S**V**P**F**K**D**K**G**DSNSAGWK  
 NSIRHNSLH**S**KFIRVQNEGT**G**KSSWMLN**P**EGGKSGK**S**PRRRA**A**SM**D**NNSKFAKRSRA**K**KKASLQSG  
 QEGAGDSPGS**Q**FSKWPAS**P**SGHSNDDFDNW**S**TFRPRTSS**N**ASTISGR**L**SPIMTEQDDLGE**G**DVHSMVYPP  
 SAAKMASTLP**S**LSEISNPEN**M**ENLLDNLNL**L**SSPTSLTV**S**TQSSPGTMM**Q**QTPCYSFAPP**N**TSLSNPS**P**NP  
 YQKYTYGQSS**M**SPLQMP**I**QTLQDNKSS**Y**GMSQYN**C**APGL**L**KELLTSD**S**PPHNDIMTP**V**DPGVAQPN**S**R  
 VLGQNVMM**G**PN**S**VMSTYGS**Q**ASHNKMMN**P**SSHTHPGHA**Q**QTS**A**VNGR**P**L**P**H**T**VSTMPHT**S**GMNRLTQ**V**KT  
 PVQVPLPH**P**M**Q**MSALGGY**S**SVSSCNGYGR**M**GLL**H**QEK**L**PSDLDMFIER**L**DCD**M**ESI**R**N**D**LM**D**MGDTLDF  
 NFDNVL**N**Q**S**FPHSVKTT**T**H**S**W**V**S**G**

**Notes**

**FOXO1A** a transcription factors of the forkhead family. Contains 1 fork-head domain. May play a role in myogenic growth and differentiation. Translocation of this gene with PAX3 has been associated with alveolar rhabdomyosarcoma. Phosphorylated FOXO1 binds 14-3-3 proteins, and co-precipitation studies with tagged proteins indicate that 14-3-3 binding involves co-operative interactions with both Thr-24 and Ser-256. Ser-256 is located in the C-terminal region of the DBD, where 14-3-3 proteins may interfere both with DNA-binding and with

nuclear-localization functions.

Multiple elements regulate nuclear/cytoplasmic shuttling of FOXO1: characterization of phosphorylation- and 14-3-3-dependent and -independent mechanisms. Zhao X, Gan L, Pan H, Kan D, Majeski M, Adam SA, Unterman TG.

Yuan Z, Lehtinen MK, Merlo P, Villén J, Gygi S, Bonni A. Regulation of neuronal cell death by MST1-FOXO1 signaling. *J Biol Chem.* 2009 Apr 24;284(17):11285-92.

Yan L, Lavin VA, Moser LR, Cui Q, Kanies C, Yang E. PP2A regulates the pro-apoptotic activity of FOXO1. *J Biol Chem.* 2008 Mar 21;283(12):7411-20.

Koh PO. Melatonin prevents the injury-induced decline of Akt/forkhead transcription factors phosphorylation. *J Pineal Res.* 2008 Sep;45(2):199-203.

Won CK, Ji HH, Koh PO. Estradiol prevents the focal cerebral ischemic injury-induced decrease of forkhead transcription factors phosphorylation. *Neurosci Lett.* 2006 May 1;398(1-2):39-43.

Woods YL, Rena G. Effect of multiple phosphorylation events on the transcription factors FKHR, FKHL1 and AFX. *Biochem Soc Trans.* 2002 Aug;30(4):391-7.

Rena G, Prescott AR, Guo S, Cohen P, Unterman TG. Roles of the forkhead in rhabdomyosarcoma (FKHR) phosphorylation sites in regulating 14-3-3 binding, transactivation and nuclear targeting. *Biochem J.* 2001 Mar 15;354(Pt 3):605-12.

Morishita D, Katayama R, Sekimizu K, Tsuruo T, Fujita N. Pim kinases promote cell cycle progression by phosphorylating and down-regulating p27Kip1 at the transcriptional and posttranscriptional levels. *Cancer Res.* 2008 Jul 1;68(13):5076-85.

Yuan Z, Becker EB, Merlo P, Yamada T, DiBacco S, Konishi Y, Schaefer EM, Bonni A. Activation of FOXO1 by Cdk1 in cycling cells and postmitotic neurons. *Science.* 2008 Mar 21;319(5870):1665-8.

**Human FOXO3** Forkhead box protein O3 (FKHRL1) (FOXO3A) (Swissprot = O43524)

```

1 MAEAPASPAP LSPLEVELDP EFEPQSRPRS C WFLQRPPEL QASPAKPSGE TAADSMIPEE
61 EDDDEDEDGG GRAGSAMAIG GGGGSGTLGS GLLLEDSARV LAPGGQDPGS GPATAAGGLS
121 GGTQALLQPQ QPLPPPQPGA AGGSGQPRKC SSRNNAWGNL SYADLI TRAI ESSPDKRLTL
181 SQIYEWVRC VPFYFKDKGDS NSSAGWKNIS RHNL SLHSRF MRVQNEGTGK SSWWI INPDG
241 GKSGKAPRRR AVSMDNSNKY TKSRAAKK KAALQTAPES ADDSPS QLSK WPGSPTSRS
301 DELDAWTD FR SRTNSASTV SGR LSPIMAS TELDEVQDDD APLSPMLYSS SASLSPSVSK
361 PCTVELPRLT DMAGTMNLND GLTENLMDDL LDNITLPPSQ PSPTGGLMQR SSSFPYTTKG
421 SGLGSPTSSF NSTVFGPSSL NSLRQSPMQT IQENK PATFS SM SHYGNQTL QDLLTSDSLS
481 HSDVMMTQSD PLMSQASTAV SAQNSRRNV M LRNDPMM SFA AQP NQGS LVN QNLLHHQHQT
541 QGALGGSRAL SNSVSNMGLS ESSSLGSAKH QQSPV SQSM QTLSDSLSGS SLYSTSANLP
601 VMGHEKFP SD LDLDMFNGSL ECDMESIIRS ELM DADGLDF NFD SLISTQN VVGLNVGNFT
661 GAKQASSQSW VPG

```

>gi|8134467|sp|O43524.1|FOXO3\_HUMAN RecName: Full=Forkhead box protein O3; AltName: Full=Forkhead in rhabdomyosarcoma-like 1; AltName: Full=AF6q21 protein

```

MAEAPASPAPLSPLEVELDP EFEPQSRPRSCTWFLQRPPELQASPAKPSGETAADSMIPEEEDDEDDEDGG
GRAGSAMAIGGGGSGTLGSGLLLEDSARVLAPGGQDPGSGPATAAGGLSGGTQALLQPQQLPPPQPGA
AGGSGQPRKCSRRNNAWGNLSYADLI TRAI ESSPDKRLTL SQIYEWVRCVPFYFKDKGDSNSSAGWKNIS
RHNL SLHSRFMRVQNEGTGKSSWWI INPDGGKSGKAPRRRAVSM DNSNKYTKSRAAKKKAALQTAPES
ADDSPS QLSKWP GSP T SRSDELDAWTD FR SRTNSASTV SGR LSPIMAS TELDEVQDDD APLSPMLYSS
SASLSPSVSKPCTVELPRLTDMAGTMNLNDGLTENLMDDL LDNITLPPSQPSPTGGLMQR SSSFPYTTKG
SGLGSPTSSFNSTVFGPSSLNSLRQSPMQT IQENK PATFS SM SHYGNQTL QDLLTSDSLSHSDVMMTQSD
PLMSQASTAVSAQNSRRNVMLRNDPMM SFAAQP NQGS LVN QNLLHHQHQTQGALGGSRALSNSVSNMGLS
ESSSLGSAKHQQSPV SQSM QTLSDSLSGS SLYSTSANLPVMGHEKFP SD LDLDMFNGSLECDMESIIRS
ELMDADGLDFNFD SLISTQN VVGLNVGNFTGAKQASSQSWVPG

```

**Notes**

Higher levels of FOXO3A in the cytosol correlated with phosphorylation at Ser253, which accounted for its nuclear exclusion.

FOXO4 (together with FOXO1, FOXO3a and FOXO6) belongs to a small subfamily of the forkhead transcription factors, which is designated as FOXO.

**References to 14-3-3 binding to FOXO3A**

Shukla S, Shukla M, MacLennan GT, Fu P, Gupta S. Deregulation of FOXO3A during prostate cancer progression. *Int J Oncol.* 2009 Jun;34(6):1613-20.

Su B, Liu H, Wang X, Chen SG, Siedlak SL, Kondo E, Choi R, Takeda A, Castellani RJ, Perry G, Smith MA, Zhu X, Lee HG. Ectopic localization of FOXO3a protein in Lewy bodies in Lewy body dementia and Parkinson's disease. *Mol Neurodegener.* 2009 Jul 23;4:32.

Yuan Z, Lehtinen MK, Merlo P, Villén J, Gygi S, Bonni A. Regulation of neuronal cell death by MST1-FOXO1 signaling. *J Biol Chem.* 2009 Apr 24;284(17):11285-92.

Kino T, De Martino MU, Charmandari E, Ichijo T, Chrousos GP. HIV-1 accessory protein Vpr inhibits the effect of insulin on the Foxo subfamily of forkhead transcription factors by interfering with their binding to 14-3-3 proteins: potential clinical implications regarding the insulin resistance of HIV-1-infected patients. *Diabetes.* 2005 Jan;54(1):23-31.

Morishita D, Katayama R, Sekimizu K, Tsuruo T, Fujita N. Pim kinases promote cell cycle progression by phosphorylating and down-regulating p27Kip1 at the transcriptional and posttranscriptional levels. *Cancer Res.* 2008 Jul 1;68(13):5076-85.

Chong ZZ, Maiese K. Erythropoietin involves the phosphatidylinositol 3-kinase pathway, 14-3-3 protein and FOXO3a nuclear trafficking to preserve endothelial cell integrity. *Br J Pharmacol.* 2007 Apr;150(7):839-50.

Muñoz-Fontela C, Marcos-Villar L, Gallego P, Arroyo J, Da Costa M, Pomeranz KM, Lam EW, Rivas C. Latent protein LANA2 from Kaposi's sarcoma-associated herpesvirus interacts with 14-3-3 proteins and inhibits FOXO3a transcription factor. *J Virol.* 2007 Feb;81(3):1511-6.

Brunet A, Kanai F, Stehn J, Xu J, Sarbassova D, Frangioni JV, Dalal SN, DeCaprio JA, Greenberg ME, Yaffe MB. 14-3-3 transits to the nucleus and participates in dynamic nucleocytoplasmic transport. *J Cell Biol.* 2002 Mar 4;156(5):817-28. Erratum in: *J Cell Biol* 2002 Apr 29;157(3):533.

|                                                                                                                                                                                                                                                                                                                                                                                                                                                                                                                                                                                                                                                                                                                                                                                                                                                                                                                                                                                                                                                                                                                                                                                                                                                                                                                                                                                                                                                                                                                                                                                                                                                                                                                                                                                                                                                                                                                                                                                                                                                                                                                                                                                                                                                                                                                                                                                                                                                                                                                                                                                                                                                                                                                                                                                                                                                                                                            |  |
|------------------------------------------------------------------------------------------------------------------------------------------------------------------------------------------------------------------------------------------------------------------------------------------------------------------------------------------------------------------------------------------------------------------------------------------------------------------------------------------------------------------------------------------------------------------------------------------------------------------------------------------------------------------------------------------------------------------------------------------------------------------------------------------------------------------------------------------------------------------------------------------------------------------------------------------------------------------------------------------------------------------------------------------------------------------------------------------------------------------------------------------------------------------------------------------------------------------------------------------------------------------------------------------------------------------------------------------------------------------------------------------------------------------------------------------------------------------------------------------------------------------------------------------------------------------------------------------------------------------------------------------------------------------------------------------------------------------------------------------------------------------------------------------------------------------------------------------------------------------------------------------------------------------------------------------------------------------------------------------------------------------------------------------------------------------------------------------------------------------------------------------------------------------------------------------------------------------------------------------------------------------------------------------------------------------------------------------------------------------------------------------------------------------------------------------------------------------------------------------------------------------------------------------------------------------------------------------------------------------------------------------------------------------------------------------------------------------------------------------------------------------------------------------------------------------------------------------------------------------------------------------------------------|--|
| <p>Brunet A, Bonni A, Zigmund MJ, Lin MZ, Juo P, Hu LS, Anderson MJ, Arden KC, Blenis J, Greenberg ME. Akt promotes cell survival by phosphorylating and inhibiting a Forkhead transcription factor. <i>Cell</i>. 1999 Mar 19;96(6):857-68.</p>                                                                                                                                                                                                                                                                                                                                                                                                                                                                                                                                                                                                                                                                                                                                                                                                                                                                                                                                                                                                                                                                                                                                                                                                                                                                                                                                                                                                                                                                                                                                                                                                                                                                                                                                                                                                                                                                                                                                                                                                                                                                                                                                                                                                                                                                                                                                                                                                                                                                                                                                                                                                                                                            |  |
| <p><b>Human FOXO4</b> Forkhead box protein O4 (AFX, AFX1, MLLT7) (Swissprot = P98177)</p> <p>1 MDPGNENSAT EAAAIIDLDP DFEPQSRPRS C WFLPRPEI ANQPSEPPEV EPDLGEKVHT<br/> 61 EGRSEPIILL SRLPEPAGGP QPGILGAVTG PRKGGSRRNA WGNQSYAELI SQAIESAPEK<br/> 121 RLTLAQIYEW MVRTVPYFKD KGDSNSSAGW KNSIRHNLSL HSKFIKVHNE ATGKSSWWML<br/> 181 NPEGKSGKA PRRRAAS MDS SSKLLRGRSK APKKKPSVLP APPEGATPTS PVGHFAKWSG<br/> 241 SPCSRNREEA DMWTFRPRS SSNASSVSTR LSPLRPESEV LAEEIPASVS SYAGGVPPTL<br/> 301 NEGLELLDGL NLTSSSHSLLS RSGLSGFSLQ HPGVTGPLHT YSSSLFSPA E GPLSAGEGCF<br/> 361 SSSQALEALL TSDTPPPPAD VLMTQVDPIL SQAPTL LLLG GLPSSSKLAT GVGLCPKPLE<br/> 421 APGSSSLVPT LSMIAPPPVM ASAPIPKALG TPVLTPTTEA ASQDRMPQDL DLDMYMENLE<br/> 481 CDMNDIISDL MDEGEGLDFN FEPDP</p> <p>&gt;gi 110825720 sp P98177.5 FOXO4_HUMAN RecName: Full=Forkhead box protein O4;<br/> AltName: Full=Fork head domain transcription factor AFX1<br/> MDPGNENSATEAAAIIDLDPDFEPQSRPRSCTWPLRPEIANQPSEPPEVEPDLGEKVHTEGRSEPIILLP<br/> SRLPEPAGGPQPGILGAVTGPRKGGSRNAWGNQSYAELISQAIESAPEKRLTLAQIYEWVVRTVPYFKD<br/> KGDSNSSAGWKNSIRHNLSLHSHKFIKVHNEATGKSSWWMLNPEGKSGKAPRRRAASMDSSSKLLRGRSK<br/> APKKKPSVLPAPPEGATPTSPVGHFAKWSGSPCSRNREEDMWTFRPRSSSNASSVSTRLSPLRPESEV<br/> LAEEIPASVSSYAGGVPPTLNEGLELLDGLNLTSSSHSLLSRSGLSGFSLQHPGVTGPLHTYSSSLFSPA<br/> GPLSAGEGCFSSSQALEALLTSDTPPPPADVLMQVDPILSQAPTL LLLGGLPSSSKLATGVGLCPKPLE<br/> APGSSSLVPTLSMIAPPPVMASAPIPKALGTPVLTPTTEAASQDRMPQDL DLDMYMENLECDMNDIISDL<br/> MDEGEGLDFNFEPDP</p> <p><b>Notes</b><br/> AKT/PKB phosphorylation site Ser193</p> <p><b>References to 14-3-3 binding to FOXO4</b><br/> Silhan J, Vacha P, Strnadova P, Vecer J, Herman P, Sulc M, Teisinger J, Obsilova V, Obsil T. 14-3-3 protein masks the DNA binding interface of forkhead transcription factor FOXO4. <i>J Biol Chem</i>. 2009 Jul 17;284(29):19349-60.<br/> Boura E, Silhan J, Herman P, Vecer J, Sulc M, Teisinger J, Obsilova V, Obsil T. Both the N-terminal loop and wing W2 of the forkhead domain of transcription factor Foxo4 are important for DNA binding. <i>J Biol Chem</i>. 2007 Mar 16;282(11):8265-75.<br/> Obsilova V, Vecer J, Herman P, Pabianova A, Sulc M, Teisinger J, Boura E, Obsil T. 14-3-3 Protein interacts with nuclear localization sequence of forkhead transcription factor FoxO4. <i>Biochemistry</i>. 2005 Aug 30;44(34):11608-17.</p>                                                                                                                                                                                                                                                                                                                                                                                                                                                                                                                                               |  |
| <p><b>Human GAB2</b> GRB2-associated binding protein 2 (Swissprot = Q9UQC2)</p> <p>1 MSGGGDVVCT GWLRKSPPEK KLRRYAWKKR WFILRSGRMS GDPDVLEYK NDHKKPLRI<br/> 61 INLNFCQVD AGLTFNKKEL QDSFVFDIKT SERTFYLVAE TEEDMNKVVQ SICQICGFNQ<br/> 121 AEESTDSLRL VSSAGHGPRS SPAELSSSSQ HLLRERKSSA PSHSSQPTLF TFEPVSNHM<br/> 181 QPTLSTAPQ EYLYLHQICIS RRAENARSAS FSQGTASF LMRSDTAVQKL AQGNHCVNG<br/> 241 ISGQVHGFPY LPKPSRHNT EFRDSTYDLPR SLASHGHTK SLTGSETDNE DVTYFKTPSN<br/> 301 TLCREFGDLL VDNMDVPATP LSAYQIPRTF TLDKNHNAMT VATPGDSAIA PPRPPKPSQ<br/> 361 AETPRWGSQP QRPPISNSR SVAATIPRRN L LPAMDNSRL HRASSCETYE YPQRGGESAG<br/> 421 RSAESMSDGV GSFPLPKMIV GRSDSTNS E NYVPMNPGSS TLLAMERAG NSQSVIY PMS<br/> 481 PGAHHFDSL G YPSTLTPVHR GPSRGSEIQP PPVNRNLKPD RKAKPTPLDL RNNTVIDELP<br/> 541 FKSPITKSW RANHTFNSS SQYCRPISTQ SITSTDSGDS EENYVPMQNP VSASPVPSGT<br/> 601 NSPAPKSTG SVDYLALDFQ PSSPSPHRK STSSVTSDEK VDYVQVDEK TQALQNTMQE<br/> 661 WTDVRSSEPK SKGAKL</p> <p>&gt;gi 46396035 sp Q9UQC2.1 GAB2_HUMAN RecName: Full=GRB2-associated-binding protein 2; AltName: Full=Growth factor receptor bound protein 2-associated protein 2; AltName: Full=GRB2-associated binder 2; AltName: Full=pp100<br/> MSGGGDVVCTGWLRKSPPEKLRRYAWKKRWFILRSGRMSGDPDVLEYKNDHKKPLRIINLNFCQVD<br/> AGLTFNKKELQDSFVFDIKTSERTFYLVAETEEDMNKVVQSICQICGFNQAEEESTDSLRLNVSSAGHGPRS<br/> SPAELSSSSQHLLRERKSSAPSHSSQPTLFTFEPVSNHMQPTLSTAPQYLYLHQICISRRAENARSAS<br/> FSQGTASF LMRSDTAVQKL AQGNHCVNGISGQVHGFPY LKPKPSRHNT EFRDSTYDLPRSLASHGHTK<br/> SLTGSETDNE DVTYFKTPSN TLCREFGDLLVDNMDVPATPLSAYQIPRTFTLDKNHNAMT VATPGDSAIA<br/> PPRPPKPSQAETPRWGSQPQRPPISNSRVAATIPRRNLPAMDNSRLHRASSCETYEYPQRGGESAG<br/> RSAESMSDGVGSFPLPKMIVGRSDSTNS E NYVPMNPGSS TLLAMERAGDNSQSVIY PMSPGAHHFDSL<br/> YPSTLTPVHRGPSRGSEIQPPVNRNLKPD RKAKPTPLDLRNNTVIDELP FKSPITKSWRANHTFNSS<br/> SQYCRPISTQSITSTDSGDS EENYVPMQNPVSASPVPSGTNSPAPKSTG SVDYLALDFQ PSSPSPHRK<br/> STSSVTSDEKVDYVQVDEK TQALQNTMQE WTDVRSSEPKSKGAKL</p> <p><b>Notes</b><br/> “Growth factor-induced phosphorylation of Gab2 on two residues, S210 and T391, leads to recruitment of 14-3-3 proteins. Together, these events mediate negative-feedback regulation, as Gab2(S210A/T391A) exhibits sustained receptor association and signalling and promotes cell proliferation and transformation.” In human Gab2, NARSA(pS210)FSQGT and IPRRN(pT391)LPAM (conserved in Gab2 from mouse, rat, Monodelphis, Gallus, Tetraodon), but not conserved in Gab1 and Gab3. Binding of 14-3-3 proteins attenuate Grb2 binding to Gab2. (Bummer et al 2008).”</p> <p><b>References to 14-3-3 binding to Gab2</b><br/> Brunner T, Larance M, Herrera Abreu MT, Lyons RJ, Timpson P, Emmerich CH, Fleuren ED, Lehrbach GM, Schramek D, Guilhaus M, James DE, Daly RJ. Phosphorylation-dependent binding of 14-3-3 terminates signalling by the Gab2 docking protein. <i>EMBO J</i>. 2008 Sep 3;27(17):2305-16.</p> |  |
| <p><b>Human GEM</b> Kir/Gem, with Rad, Rem and Rem2, is a member of the RGK small GTP-binding protein family (Swissprot = P55040)</p> <p>1 MTLNVTMRG GTVGMQPQQQ RWI PADGRH LMVQKEPHQY SHRNHRSATP EDHCRRSWSS<br/> 61 DSTDSVISSE SGNFYRVLV IGEQGVGKST LANIFAGVHD SMDSDCVVLG EDTYERTLMV</p>                                                                                                                                                                                                                                                                                                                                                                                                                                                                                                                                                                                                                                                                                                                                                                                                                                                                                                                                                                                                                                                                                                                                                                                                                                                                                                                                                                                                                                                                                                                                                                                                                                                                                                                                                                                                                                                                                                                                                                                                                                                                                                                                                                                                                                                                                                                                                                                                                                                                                                                                                                                                                   |  |

|                                                                                                                                                                                                                                                                                                                                                                                                                                                                                                                                                                                                                                                                                                                                                                                                                                                                                                                                                                                                                                                                                                                                                                                                                                                                                                                                                                                                                                                                                                                                                                                                                                                                                                                                                                                                                                                                                                                                                                                                                                                                                                                                                                                                                                                                                                                                                                                                                                                                                                                                                                                          |                                            |
|------------------------------------------------------------------------------------------------------------------------------------------------------------------------------------------------------------------------------------------------------------------------------------------------------------------------------------------------------------------------------------------------------------------------------------------------------------------------------------------------------------------------------------------------------------------------------------------------------------------------------------------------------------------------------------------------------------------------------------------------------------------------------------------------------------------------------------------------------------------------------------------------------------------------------------------------------------------------------------------------------------------------------------------------------------------------------------------------------------------------------------------------------------------------------------------------------------------------------------------------------------------------------------------------------------------------------------------------------------------------------------------------------------------------------------------------------------------------------------------------------------------------------------------------------------------------------------------------------------------------------------------------------------------------------------------------------------------------------------------------------------------------------------------------------------------------------------------------------------------------------------------------------------------------------------------------------------------------------------------------------------------------------------------------------------------------------------------------------------------------------------------------------------------------------------------------------------------------------------------------------------------------------------------------------------------------------------------------------------------------------------------------------------------------------------------------------------------------------------------------------------------------------------------------------------------------------------------|--------------------------------------------|
| <p>121 DGESATIILL DMWENKGENE WLHDHCMQVG DAYLIVYSIT DRASFEEKASE LRIQLRRARQ<br/> 181 TEDIPILVIG NKSDLVRCRE VSVSEGRACA VVFDCKFIET SAAVQHNKVE LFEGIVRQVR<br/> 241 LRRDSKEKNE RRLAYQKRKE SMPRKARFEW GKIVAKNNKN MAFKLSKSKC HDLSVL<br/> &gt;gi 1707896 sp P55040.1 GEM_HUMAN RecName: Full=GTP-binding protein GEM;<br/> AltName: Full=GTP-binding mitogen-induced T-cell protein; AltName: Full=RAS-like protein KIR</p> <p>MTLNNVTMRQGTVMQPPQQQRWSIPADGRHLMVQKEPHQYSHRNRHSATPEDHCRSSWSSDSTDSVISSE<br/> SGNTYYRVVLI GEQGVGKSTLANIFAGVHDSMDS DCEVLGEDTYERTLMVDGESATIILLDMWENKGENE<br/> WLHDHCMQVGDAYLIVYSITDRASFEEKASELRIQLRRARQTEDIPIILVGNKSDLVRCREVSSEGRACA<br/> VVFDCKFIETSAAVQHNKVELFEGIVRQVRLRRDSKEKNERRLAYQKRKESMPRKARRFWGKIVAKNNKN<br/> MAFKLSKSKSCHDLSVL</p> <p><b>Notes</b><br/> Human - Phosphorylation of serine 289 in conjunction with serine 23 results in bidentate 14-3-3 binding, leading to increased Gem protein half-life (Ward et al 2004).</p> <p><b>References to 14-3-3 binding to Kir/Gem</b><br/> Mahalakshmi RN, Nagashima K, Ng MY, Inagaki N, Hunziker W, Béguin P. Nuclear transport of Kir/Gem requires specific signals and importin alpha5 and is regulated by calmodulin and predicted serine phosphorylations. <i>Traffic</i>. 2007 Sep;8(9):1150-63.<br/> Mahalakshmi RN, Ng MY, Guo K, Qi Z, Hunziker W, Béguin P. Nuclear localization of endogenous RGK proteins and modulation of cell shape remodeling by regulated nuclear transport. <i>Traffic</i>. 2007 Sep;8(9):1164-78.<br/> Béguin P, Mahalakshmi RN, Nagashima K, Cher DH, Takahashi A, Yamada Y, Seino Y, Hunziker W. 14-3-3 and calmodulin control subcellular distribution of Kir/Gem and its regulation of cell shape and calcium channel activity. <i>J Cell Sci</i>. 2005 May 1;118(Pt 9):1923-34.<br/> Ward Y, Spinelli B, Quon MJ, Chen H, Ikeda SR, Kelly K. Phosphorylation of critical serine residues in Gem separates cytoskeletal reorganization from down-regulation of calcium channel activity. <i>Mol Cell Biol</i>. 2004 Jan;24(2):651-61.</p>                                                                                                                                                                                                                                                                                                                                                                                                                                                                                                                              |                                            |
| <p><b>Human GFAP</b> Glial fibrillary acidic protein (Swissprot = P14136)</p> <p>1 MERRRITSAA RRSYVSSGEM MVGGLAPGRR LGPGTRLSLA RMPPPLPTRV DFSLAGALNA<br/> 61 GFKETRASER AEMMELNDRF ASYIEKVRFL EQQNKALAAE LNQLRAKEPT KLADVYQAEEL<br/> 121 RELRLRLDQL TANSARLEVE RDNLAQDLAT VRQKLQDET N LRLEAENNLA AYRQEAEAT<br/> 181 LARLDLERKI ESLEEEIRFL RKIHEEEVRE LQEQLARQV HVELDVAKPD LTAALKERT<br/> 241 QYEAMASSNM HEAEWYRSK FADLTDAAR NAELLRQAKH EANDYRRQLQ SLTCDLESRL<br/> 301 GTNESLERQM REQEEHVRE AASYQEALAR LEEEGQSLKD EMARHLQEYQ DLLNVKLALD<br/> 361 IEIATYRKLK EGEENRITIP VQTFSNLQIR ETSLDTKSVS EGHKLRNIVV KTVEMRDGEV<br/> 421 IKESKQEHKD VM</p> <p>&gt;gi 121135 sp P14136.1 GFAP_HUMAN RecName: Full=Glial fibrillary acidic protein; Short=GFAP</p> <p>MERRRITSAARRSYVSSGEMVGGGLAPGRR LGPGTRLSLARMPPLPTRVDFSLAGALNAGFKETRASER<br/> AEMMELNDRFASYIEKVRFL EQQNKALAAELNQLRAKEPTKLADVYQAEELRELRLRLDQLTANSARLEVE<br/> RDNLAQDLATVRQKLQDET NLRLEAENNLAAYRQEAEATLRLDLERKIESLEEEIRFLRKIHEEEVRE<br/> LQEQLARQVHVELDVAKPDLTAALKEIRTYQEAMASSNMHEAEWYRSKFADLTDAARNAELLRQAKH<br/> EANDYRRQLQSLTCDLESRLGTNESLERQMREQEEHVREAASYQEALARLEEEGQSLKDEMARHLQEYQ<br/> DLLNVKLALDIEIATYRKLKLEGEENRITIPVQTFSNLQIRETSLDTKSVSEGHKLRNIVVKTVEMRDGEV<br/> IKESKQEHKDVV</p> <p><b>Notes</b><br/> GFAP a class-III intermediate filament protein. A cell-specific marker that, during the development of the central nervous system, distinguishes astrocytes from other glial cells. Mutations in this gene cause Alexander disease, a rare disorder of astrocytes in the central nervous system. An additional transcript variant isoform has been described. 14-3-3gamma associates with both soluble and filamentous GFAP in a phosphorylation- and cell-cycle-dependent manner in primary cultured astrocytes. The amount of association increases during G2/M phase due to more phosphorylated GFAP. Serine 8 in the head domain is essential for the direct association of GFAP to 14-3-3gamma. Overexpression of 14-3-3gamma destroyed the integrity and affected the movement of GFAP intermediate filaments. This data demonstrates that 14-3-3gamma contributes to the regulation of dynamics of GFAP filaments, which may contribute to the stability of the cytoskeleton and the mechanisms of central nervous system neurodegenerative disease.</p> <p><b>References to 14-3-3 binding to GFAP</b><br/> Li H, Guo Y, Teng J, Ding M, Yu AC, Chen J. 14-3-3gamma affects dynamics and integrity of glial filaments by binding to phosphorylated GFAP. <i>J Cell Sci</i>. 2006 Nov 1;119(Pt 21):4452-61.</p> |                                            |
| <p><b>Human GIT1</b> (G protein-coupled receptor kinase-interactor 1)</p> <p><b>Notes</b><br/> <b>References to 14-3-3 binding to GIT1</b><br/> Angrand PO, Segura I, Völkel P, Ghidelli S, Terry R, Brajenovic M, Vintersten K, Klein R, Superti-Furga G, Drewes G, Kuster B, Bouwmeester T, Acker-Palmer A. Transgenic mouse proteomics identifies new 14-3-3-associated proteins involved in cytoskeletal rearrangements and cell signaling. <i>Mol Cell Proteomics</i>. 2006 Dec;5(12):2211-27.</p>                                                                                                                                                                                                                                                                                                                                                                                                                                                                                                                                                                                                                                                                                                                                                                                                                                                                                                                                                                                                                                                                                                                                                                                                                                                                                                                                                                                                                                                                                                                                                                                                                                                                                                                                                                                                                                                                                                                                                                                                                                                                                  | <p>SITES NOT REPORTED. NOT IN WEBLOGO.</p> |
| <p><b>Human Gli1</b> GLI family zinc finger 1 (Glioma-associated oncogene) transcription factor (Swissprot = P08151)</p> <p>1 MFNSMTPEPI SSYGEPCCLR PLPSQGAPSV GTEGLSGPPF CHQANLMSGP HSYGFARETN<br/> 61 SCTEGPLFSS PRSAVKLTKK RALSISPLSD ASLDLQTVIR TSPSSLVAFI NSRCTSPGGS<br/> 121 YGHLSIGTMS PSLGFPAQMN HQKGPSPSFG VQPCGPHDSA RGMIPHPQS RGFPTCQLK<br/> 181 SELDMLVGKC REEPLEGDMS SPNSTGIQDP LLGMLDGRED LEREKREPE SVYETDCRWD<br/> 241 GCSQEFDSQE QLVHHINSEH IGERKEFVC HWGGCSREL R PFKAQYMLVV HMRRHTGKPK<br/> 301 HKCTFEGCRK SYSRLENLKT HRSHTGKPK YMCHEGCSK AFSNASDRAK HQNRTHSNEK<br/> 361 PYVCKLPGCT KRYTDPSSLR KHVKTVHGPD AHVTKRHRGD GPLPRAPSIS TVEPKREREG<br/> 421 GPIREESRLT VPEGAMKQP SPGAQSSCSS DHSFAGSAAN TDSGVEMTGN AGGSTEDLSS<br/> 481 LDEGPCIAGT GLSTLRRLEN LRLDQLHQLR PIGTRGLKLP SLSHTGTTVS RRVGPPVSL<br/> 541 RRSSTSSSIS SAYTVSRRSS LASFPFGSPS PENGASSLPG LMPAQHYLLR ARYASARGGG</p>                                                                                                                                                                                                                                                                                                                                                                                                                                                                                                                                                                                                                                                                                                                                                                                                                                                                                                                                                                                                                                                                                                                                                                                                                                                                                                                                                                                                                                                                                                                                                                                                                                                                                           |                                            |



|                                                                                                                                                                                                                                                                                                                |             |             |             |             |             |             |             |
|----------------------------------------------------------------------------------------------------------------------------------------------------------------------------------------------------------------------------------------------------------------------------------------------------------------|-------------|-------------|-------------|-------------|-------------|-------------|-------------|
| 601                                                                                                                                                                                                                                                                                                            | TSPTAASSLD  | RIGGLPMPW   | RSRAEYPGYN  | PNAGVTRRA   | S           | DPAQAADRP   | PARVQRFKSL  |
| 621                                                                                                                                                                                                                                                                                                            | GCVHTPPTVA  | GGGQNFDPYL  | PTSVYSPQPP  | SITENAAMDA  |             | RGLQEEPEV   | TSMVGSGLNP  |
| 761                                                                                                                                                                                                                                                                                                            | YMDLFPPTDTL | GYGPEGAAA   | EPYGARGPGS  | LPLGPGPPTN  |             | YGFNPCPQQA  | SYDPDPTQETW |
| 781                                                                                                                                                                                                                                                                                                            | GEFPPSHSGLY | PGPKALGGTY  | SQCPRLHYG   | QVQVKPEQGC  |             | PVGSDDSTGLA | PCLNAHSEG   |
| 841                                                                                                                                                                                                                                                                                                            | PPHPQPLFSH  | YPQSPPPQYL  | QSGPYTQPPP  | DYLPSEPRFC  |             | LDLFDSPHST  | GQLKAQLVCN  |
| 901                                                                                                                                                                                                                                                                                                            | YVQSQQELLW  | EGGGREDAPA  | QEPSYQSPKF  | LGGSQVSPSR  |             | AKAPVNTYGP  | GFGPNLNPHK  |
| 961                                                                                                                                                                                                                                                                                                            | SGSYPTPSPC  | HENFVVGANR  | ASHRAAAPPR  | LLPPLPTCYG  |             | PLKVGGTNPS  | CGHPEVGRLG  |
| 1021                                                                                                                                                                                                                                                                                                           | GGPALYPPPE  | GQVCNPLDSL  | DLNNTQLDFV  | ATLDEPQGLS  |             | PPPSHDQRGS  | SGHTPPPSGP  |
| 1081                                                                                                                                                                                                                                                                                                           | PNMAVGNMSV  | LLRSLPGETE  | FLNSSA      |             |             |             |             |
| <b>Notes</b>                                                                                                                                                                                                                                                                                                   |             |             |             |             |             |             |             |
| Similar PKA-phosphorylated sites in Gli1, Gli2 and Gli3 (see other entries).                                                                                                                                                                                                                                   |             |             |             |             |             |             |             |
| <b>References to 14-3-3 binding to Gli1</b>                                                                                                                                                                                                                                                                    |             |             |             |             |             |             |             |
| Asaoka Y, Kanai F, Ichimura T, Tateishi K, Tanaka Y, Ohta M, Seto M, Tada M, Ijichi H, Ikenoue T, Kawabe T, Isobe T, Yaffe MB, Omata M. Identification of a suppressive mechanism for hedgehog signaling through a novel interaction of Gli with 14-3-3. <i>J Biol Chem.</i> 2009 Dec 7. [Epub ahead of print] |             |             |             |             |             |             |             |
| <b>Human Gli2</b> GLI family zinc finger 2 (Tax helper protein) transcription factor (Swissprot = P10070)                                                                                                                                                                                                      |             |             |             |             |             |             |             |
| 1                                                                                                                                                                                                                                                                                                              | METSASATAS  | EKQEAQSGIL  | EAAGFPDPGK  | KASPLVVAAA  | AAAAVAAQGV  | PQHLLPPFHA  |             |
| 61                                                                                                                                                                                                                                                                                                             | PLPIDMRHQE  | GRYHYEPHSV  | HGVHGPPALS  | GSPVISDISL  | IRLSPHPAGP  | GESPFNAPHP  |             |
| 121                                                                                                                                                                                                                                                                                                            | YVNPHEHYL   | RSVHSSPTLS  | MISAARGLSP  | ADVAQEHLKE  | RGLFGLPAPG  | TTPSDYYHQM  |             |
| 181                                                                                                                                                                                                                                                                                                            | TLVAGHPAPY  | GDLMLQSGGA  | ASAPHLHDYL  | NPVDVSRFSS  | PRVTPRLSRK  | RALSISPLSD  |             |
| 241                                                                                                                                                                                                                                                                                                            | ASLDLQRMIR  | TSPNSLVAYI  | NNSRSSSAAS  | GSYGHLASGA  | LSPAFTFPHF  | INPVAYQQIL  |             |
| 301                                                                                                                                                                                                                                                                                                            | SQQRGLGSAF  | GHTPPLIQPS  | PTFLAQQPMA  | LTSINATPTQ  | LSSSSNCLSD  | TNQNKQSSS   |             |
| 361                                                                                                                                                                                                                                                                                                            | AVSSTVNPAV  | IHKRSKVKTE  | PEGLRPASPL  | ALTQGGVSGH  | GSCGCALPLS  | QEQLADLKED  |             |
| 421                                                                                                                                                                                                                                                                                                            | LDRDDCKQEA  | EVVIYETNCH  | WEDCTKEYDT  | QEQLVHHINN  | EHIHGEKKEF  | VCRWQACTRE  |             |
| 481                                                                                                                                                                                                                                                                                                            | QKPFKAQYML  | VVHMRRHTGE  | KPHKCTFEGC  | SKAYSRLLENL | KTHLRSHTGE  | KPYVCEHEGC  |             |
| 541                                                                                                                                                                                                                                                                                                            | NKAFNSASDR  | AKHQNRTHSN  | EKPYICKIPG  | CTKRYTDPSS  | LRKHVKTVHG  | PDHAVTKKQR  |             |
| 601                                                                                                                                                                                                                                                                                                            | NDVHLRTPPL  | KENDGSEAGT  | EPGGPESTE   | SSTSQAVEDC  | LHVRAIKTES  | SGLCQSSPGA  |             |
| 661                                                                                                                                                                                                                                                                                                            | SSCSSESPSP  | LGSAPNNDSSG | VEMPGTGP    | LGDLTALDDT  | PPGADTSALA  | APSAGGLQLR  |             |
| 721                                                                                                                                                                                                                                                                                                            | KHMTTMRHFE  | QLKKEKLSL   | KDSCSWAGPT  | PHTRNTKLP   | LPGSGSILEN  | FSGSGGGGPA  |             |
| 781                                                                                                                                                                                                                                                                                                            | GLLNPRLSE   | LSASEVTMLS  | QLQERRDSST  | STVSSAYTVS  | RRSSGISPYF  | SSRRSSEASP  |             |
| 841                                                                                                                                                                                                                                                                                                            | LGAGRPHNAS  | SADSYDPIST  | DASRRSSEAS  | QCSGSGLLN   | LTPAQQYSLR  | AKYAAATGGP  |             |
| 901                                                                                                                                                                                                                                                                                                            | PPTPLPGLER  | MSLRTRLALL  | DAPERTLPAG  | CPRPLGPRRG  | SDGPTYGHGH  | AGAAPAFPHE  |             |
| 961                                                                                                                                                                                                                                                                                                            | APGGGARRAS  | DPVRRPDALS  | LPRVQRFHST  | HNVNPGPLPP  | CADRRGLRLQ  | SHPSTDGGLA  |             |
| 1021                                                                                                                                                                                                                                                                                                           | RGAYSPPRPPS | ISENVAMEAV  | AAGVDGAGPE  | ADLGLPEDDL  | VLDDVVQYI   | KAHASGALDE  |             |
| 1081                                                                                                                                                                                                                                                                                                           | GTGQVYPTES  | TGFSNDNRLP  | SPGLHGQRRM  | VAADSNVGPS  | APMLGGCQLG  | FGAPSSLNKN  |             |
| 1141                                                                                                                                                                                                                                                                                                           | NMPVQWNEVS  | SGTVDALASQ  | VKPPFPQGN   | LAVVQKPAF   | GQYPGYSFQG  | LQASPGGLDS  |             |
| 1201                                                                                                                                                                                                                                                                                                           | TQPHLQPRSG  | APSQGIIPRVN | YMQQLRQVA   | GSQCPCGTTT  | MSPHACYQV   | HPQLSPSTIS  |             |
| 1261                                                                                                                                                                                                                                                                                                           | GALNQFPQSC  | SNMPAKPGHL  | GHPQQTEVAP  | DPTTMGNRHR  | ELGVPDSALA  | GVPVPPVQVS  |             |
| 1321                                                                                                                                                                                                                                                                                                           | YPQQSHHLLA  | SMSQEGYHQV  | PSLLPARQPG  | FMEPQTGPMG  | VATAGFGLVQ  | PRPPLPSPT   |             |
| 1381                                                                                                                                                                                                                                                                                                           | YHRHGVNRAV  | QQLAYARATG  | HAMAAMPSSQ  | ETAEAAPKGA  | MGMNGSVPPQ  | PPQDAGGAP   |             |
| 1441                                                                                                                                                                                                                                                                                                           | DHSMLYYYGQ  | IHMIEQDGGG  | ENLGSQVMR   | SQPPQPACQ   | DSIQPQLP    | PGVNQVSSTV  |             |
| 1501                                                                                                                                                                                                                                                                                                           | DSQLLEAPQI  | DFDAIMDDGD  | HSSLFSGALS  | PSLLHLSLQN  | SSRLTTPRNS  | LTLPSIPAGI  |             |
| 1561                                                                                                                                                                                                                                                                                                           | SNMAVGDMS   | MLTSLAEEK   | FLNMMT      |             |             |             |             |
| <b>Notes</b>                                                                                                                                                                                                                                                                                                   |             |             |             |             |             |             |             |
| Similar PKA-phosphorylated sites in Gli1, Gli2 and Gli3 (see other entries). In the form of Gli2 studied by Asaoka et al (2009 prepublication date), the 14-3-3-binding site (Ser970 in the reference sequence above) is at Ser975.                                                                            |             |             |             |             |             |             |             |
| <b>References to 14-3-3 binding to Gli2</b>                                                                                                                                                                                                                                                                    |             |             |             |             |             |             |             |
| Asaoka Y, Kanai F, Ichimura T, Tateishi K, Tanaka Y, Ohta M, Seto M, Tada M, Ijichi H, Ikenoue T, Kawabe T, Isobe T, Yaffe MB, Omata M. Identification of a suppressive mechanism for hedgehog signaling through a novel interaction of Gli with 14-3-3. <i>J Biol Chem.</i> 2009 Dec 7. [Epub ahead of print] |             |             |             |             |             |             |             |
| <b>Human Gli3</b> GLI family zinc finger 3 transcription factor (Swissprot = P10071)                                                                                                                                                                                                                           |             |             |             |             |             |             |             |
| 1                                                                                                                                                                                                                                                                                                              | MEAQSHSSTT  | TEKKKVENSI  | VKCTRTRDVS  | EKAVASSTTS  | NEDESPGQTY  | HRERRNAITM  |             |
| 61                                                                                                                                                                                                                                                                                                             | QPQNVQGLSK  | VSEEPSTSSD  | ERASLIKKEI  | HGSLPHVAEP  | SVPYRGTVFA  | MDPRNGYMEP  |             |
| 121                                                                                                                                                                                                                                                                                                            | HYHPPHLPFA  | FHPPVPIDAR  | HHEGRYHYDP  | SPIPPLHMTS  | ALSSSPTYPD  | LPFIRISPHR  |             |
| 181                                                                                                                                                                                                                                                                                                            | NPTAASESPF  | SPPHPYINPY  | MDYIRSLHSS  | PSLSMISATR  | GLSPTDAPHA  | GVSPAERYHQ  |             |
| 241                                                                                                                                                                                                                                                                                                            | MALLTGQRSP  | YADIIPSAAT  | AGTGAIHMEY  | LHAMDSTRFS  | SPRLSARPSR  | KRTLISISPLS |             |
| 301                                                                                                                                                                                                                                                                                                            | DHSFDLQMTI  | RTSPNSLVTI  | LNNRSSSSA   | SGSYGHLAS   | AISPALSFTY  | SSAPVSLHMH  |             |
| 361                                                                                                                                                                                                                                                                                                            | QQILSRQQSL  | GSAFGHSPP   | IHPAPTFTPTQ | RPIPGIPTVL  | NPVQVSSGSPS | ESSQNKPTSE  |             |
| 421                                                                                                                                                                                                                                                                                                            | SAVSTGDPM   | HNKRSKIKPD  | EDLPSPGARG  | QQEQPEGTTL  | VKEEGDKDES  | KQEPEVIYET  |             |
| 481                                                                                                                                                                                                                                                                                                            | NCHWEGCARE  | FDTQEQLVHH  | INNNDIHGKE  | KEFVCRWLDC  | SREQKPFKAQ  | YMLVVHMRRH  |             |
| 541                                                                                                                                                                                                                                                                                                            | TGERKPHKCTF | EGCTKAYSRL  | ENLTKHLRSH  | TGEKPYVCEH  | EGCNKAFSNA  | SDRAKHQNR   |             |
| 601                                                                                                                                                                                                                                                                                                            | HSNEKPYVCK  | IPGCTKRYTD  | PSSLRKHVKT  | VHGPEAHVTK  | KQRGDIHPRP  | PPPRDSGSHS  |             |
| 661                                                                                                                                                                                                                                                                                                            | QSRSPGRPTQ  | GALGEQQDLS  | NTTSKREECL  | QVTKVKAKEP  | MTSQSPSGGQ  | SSCQQSQSPI  |             |
| 721                                                                                                                                                                                                                                                                                                            | SNYSNSGLEF  | PLTDGGSIGD  | LSAIDETPIM  | DSTISTATTA  | LALQARRNPA  | GTKWMEHVKL  |             |
| 781                                                                                                                                                                                                                                                                                                            | ERLKQVNGFM  | PRLNPILPPK  | APAVSPLIGN  | GTQSNNTCSL  | GGPMTLLPGR  | SDLSGVDVTM  |             |
| 841                                                                                                                                                                                                                                                                                                            | LNMLNRRDSS  | ASTISSAYLS  | SRRSSGISPC  | FSSRRSSEAS  | QAEGRPQNV   | VADSYDPIST  |             |
| 901                                                                                                                                                                                                                                                                                                            | DASRRSSEAS  | QSDGLPSLLS  | LTPAQQYRLK  | AKYAAATGGP  | PPTPLPNMER  | MSLKTRLALL  |             |
| 961                                                                                                                                                                                                                                                                                                            | GDALEPGVAL  | PPVHAPRRCS  | DGGAHGYGRR  | HLQPHDAPGH  | GVRRASDPVR  | TGSEGLALPR  |             |
| 1021                                                                                                                                                                                                                                                                                                           | VPRFSSLSSC  | NPPAMATSAE  | KRSLVLQNYT  | RPEGGQSRNF  | HSSPCPPSIT  | ENVTLSLTM   |             |
| 1081                                                                                                                                                                                                                                                                                                           | DADANLNDED  | FLPDDVVQYL  | NSQNQAGYEQ  | HFPSALPDDS  | KVPHGPGDFD  | APGLPDSHAG  |             |
| 1141                                                                                                                                                                                                                                                                                                           | QQFHALEQPC  | PEGSKTDLPI  | QWNEVSSGSA  | DLSSSKLCKG  | PRFAVPQTRA  | FGFCNGMVVH  |             |
| 1201                                                                                                                                                                                                                                                                                                           | PQNPLRSGPA  | GGYQTLGENS  | NPYGGPEHLM  | LHNSPGSGTS  | GNAFHEQPC   | APQYGNCLNR  |             |
| 1261                                                                                                                                                                                                                                                                                                           | QPVAPGALDG  | ACGAGIQASK  | LKSTPMQSGG  | GQLNFGFLPVA | PNESAGSMVN  | GMQNQDPVQG  |             |
| 1321                                                                                                                                                                                                                                                                                                           | GYLAHQLLGD  | SMQHPGAGRP  | GQQMLGQISA  | TSHINIYQGP  | ESCLPGAAGM  | GSQPSSLAVV  |             |
| 1381                                                                                                                                                                                                                                                                                                           | RGYQPCASFG  | GSRQAMPDRD  | SLALQSGQLS  | DTSQTCRVNG  | IKMEMKQPH   | PLCSNLQNY   |             |
| 1441                                                                                                                                                                                                                                                                                                           | GQFYDQTVGF  | SQQDTKAGSF  | SISDASCLLQ  | GTSAKNSELL  | SPGANQVTST  | VDSLDSHDLE  |             |

|                                                                                                                                                                                                                                                                                                                                                                                                                                                                                                                                                                                                                                                                                                                                                                                                                                                                                                                                                                                                                                                                                                                                                                                                                                                                                                                                                                                                                                                                                                                                                                                                                                                                                                                                                                                                                                                                                                                                                                                                                                                                                                                                                                                                                                                                                                                                                                                                                                                                                                                                                                                                                                                                                                                                                                                                                                                                                                                                                                                                                                                                                                                                                                                                                                                                                                                                                                                                                                                                                                                                                                                                                                                                                                                                                                                                                                                                                                                                                                                                                                                                                                                                                                                                                                                                                                                                                                                                                                                                                                                                                                                                                                                                                                                                                                                                                                                                                                                                                                                  |                                            |
|----------------------------------------------------------------------------------------------------------------------------------------------------------------------------------------------------------------------------------------------------------------------------------------------------------------------------------------------------------------------------------------------------------------------------------------------------------------------------------------------------------------------------------------------------------------------------------------------------------------------------------------------------------------------------------------------------------------------------------------------------------------------------------------------------------------------------------------------------------------------------------------------------------------------------------------------------------------------------------------------------------------------------------------------------------------------------------------------------------------------------------------------------------------------------------------------------------------------------------------------------------------------------------------------------------------------------------------------------------------------------------------------------------------------------------------------------------------------------------------------------------------------------------------------------------------------------------------------------------------------------------------------------------------------------------------------------------------------------------------------------------------------------------------------------------------------------------------------------------------------------------------------------------------------------------------------------------------------------------------------------------------------------------------------------------------------------------------------------------------------------------------------------------------------------------------------------------------------------------------------------------------------------------------------------------------------------------------------------------------------------------------------------------------------------------------------------------------------------------------------------------------------------------------------------------------------------------------------------------------------------------------------------------------------------------------------------------------------------------------------------------------------------------------------------------------------------------------------------------------------------------------------------------------------------------------------------------------------------------------------------------------------------------------------------------------------------------------------------------------------------------------------------------------------------------------------------------------------------------------------------------------------------------------------------------------------------------------------------------------------------------------------------------------------------------------------------------------------------------------------------------------------------------------------------------------------------------------------------------------------------------------------------------------------------------------------------------------------------------------------------------------------------------------------------------------------------------------------------------------------------------------------------------------------------------------------------------------------------------------------------------------------------------------------------------------------------------------------------------------------------------------------------------------------------------------------------------------------------------------------------------------------------------------------------------------------------------------------------------------------------------------------------------------------------------------------------------------------------------------------------------------------------------------------------------------------------------------------------------------------------------------------------------------------------------------------------------------------------------------------------------------------------------------------------------------------------------------------------------------------------------------------------------------------------------------------------------------------------------|--------------------------------------------|
| <p>1501 GVQIDFDIAI DDGDHSSLMS GALSPSIIQN LSHSSSRLLT PRASLPFPAL SMSTTNMAIG<br/>1561 DMSSLLTSLA EESKFLAVMQ</p> <p><b>Notes</b><br/>Similar PKA-phosphorylated sites in Gli1, Gli2 and Gli3 (see other entries). Phosphorylated 14-3-3-binding site is Ser1006.</p> <p><b>References to 14-3-3 binding to Gli3</b><br/>Asaoka Y, Kanai F, Ichimura T, Tateishi K, Tanaka Y, Ohta M, Seto M, Tada M, Ijichi H, Ikenoue T, Kawabe T, Isobe T, Yaffe MB, Omata M. Identification of a suppressive mechanism for hedgehog signaling through a novel interaction of Gli with 14-3-3. <i>J Biol Chem.</i> 2009 Dec 7. [Epub ahead of print]</p>                                                                                                                                                                                                                                                                                                                                                                                                                                                                                                                                                                                                                                                                                                                                                                                                                                                                                                                                                                                                                                                                                                                                                                                                                                                                                                                                                                                                                                                                                                                                                                                                                                                                                                                                                                                                                                                                                                                                                                                                                                                                                                                                                                                                                                                                                                                                                                                                                                                                                                                                                                                                                                                                                                                                                                                                                                                                                                                                                                                                                                                                                                                                                                                                                                                                                                                                                                                                                                                                                                                                                                                                                                                                                                                                                                                                                                                                                                                                                                                                                                                                                                                                                                                                                                                                                                                                           |                                            |
| <p><b>Human GPIbA</b> Glycocalicin; Platelet glycoprotein Ib alpha chain (GPIb alpha) (Swissprot = P07359)</p> <p>1 MPLLLLLLLL PSLPHHPIC EVSKVASHLE VNCDKRNLTA LPPDLPKDIT ILHLSENLLY<br/>61 TFSLATLMPY TRLTQNLDR CELTKLQVDG TLPVLGTLDL SHNQLQSLPL LGQTLPALTV<br/>121 LDVSNRRLTS LPLGALRGLG ELQELYLKGN ELKTLPPGLL TPTPKLEKLS LANNNLTELP<br/>181 AGLNLGNLEN DTLQLQENSL YTIKGFVFGS HLLPFAFLHG NPWLCNCEIL YFRRWLQDNA<br/>241 ENVYVWQGV DVKAMTSNVA SVQCDNSDKF PVYKYPGKGC PTLGDEGDTD LYDYYPEEDT<br/>301 EGDKVRATR VVKFPTKAHT TPWGLFYSWT TASLDSQMP S LHPTQESTK EQTTFFPRWT<br/>361 PNFTLHMESI TFSKTPKSTT EPTSPPTTSE PVPEPAPNMT TLEPTSPPTT PEPTSEPA S<br/>421 PTTPEPTPIP TIATSPTILV SATSLITPKS TFLTTTKPVS LLESTKKTIP ELDQPPKLRG<br/>481 VLQGHLESSR NDPFLHPDFC CLLPLGFYVL GLFWLLFASV VLILLLSWVG HVKQPALDSG<br/>541 QGAALTTATQ TTHLELQRGR QVTVPRAWLL FLRGS LPTFR S SLFLWVRPN GRVGPLVAGR<br/>601 RPSALSQGRG QDLLSTVSIR YSGHS</p> <p>&gt;gi 121531 sp P07359.1 GPIbA_HUMAN RecName: Full=Platelet glycoprotein Ib alpha chain; Short=Glycoprotein Ibalpha; Short=GP-Ib alpha; Short=GPIb-alpha; Short=GPIbA; AltName: Full=Antigen CD42b-alpha; AltName: CD_antigen=CD42b; Contains: RecName: Full=Glycocalicin; Flags: Precursor</p> <p>MPLLLLLLLLPSLPHHPICEVSKVASHLEVNCDKRNLTA LPPDLPKDITILHLSENLLYTFSLATLMPY TRLTQNLDRCELTKLQVDG TLPVLGTLDL SHNQLQSLPL LGQTLPALTV LDVSNRRLTS LPLGALRGLG ELQELYLKGNELKTLPPGLL TPTPKLEKLS LANNNLTELPAGLLNLENLDTLLQLQENSLYTIKGFVFGS HLLPFAFLHGNPWLNCNCEILYFRRWLQDNAENVYVWQGV DVKAMTSNVA SVQCDNSDKF PVYKYPGKGC PTLGDEGDTDLYDYYPEEDTEGDKVRATR VVKFPTKAHT TPWGLFYSWT TASLDSQMP S LHPTQESTK EQTTFFPRWT PNFTLHMESI TFSKTPKSTT EPTSPPTTSE PVPEPAPNMT TLEPTSPPTT PEPTSEPA S PTTPEPTPIP TIATSPTILV SATSLITPKS TFLTTTKPVS LLESTKKTIP ELDQPPKLRG VLQGHLESSR NDPFLHPDFC CLLPLGFYVL GLFWLLFASV VLILLLSWVG HVKQPALDSG QGAALTTATQ TTHLELQRGR QVTVPRAWLL FLRGS LPTFR S SLFLWVRPN GRVGPLVAGR RPSALSQGRG QDLLSTVSIR YSGHS</p> <p><b>Notes</b><br/><u>Underlined is the signal sequence. papers quote residue numbers that do not include this.</u><br/>From references in Bialkowska et al (2003) (to Proc Natl Acad Sci U S A. 1987 August; 84(16): 5615-5619. PMID: PMC298913). Truncation of the last 19 aa prevents 14-3-3 binding although there is no obvious 14-3-3 consensus.<br/><b>Mangin et al (2009)</b> S609 is phosphorylated in resting platelets (phosphospecific antibody) and so is the 580-590 peptide S590A reduces co-ip of 14-3-3 zeta although S587A also weakens the interaction but to a lesser extent. Dephosphorylation of these sites appears after adherence to a VWF matrix<br/>Inhibitors of PKA and PKG have no effect on S609 phosphorylation<br/>Forskolin does not induce incorporation of 32P in the 580-590 peptide<br/>S590 and S609 are 19 residues apart<br/>"GPIb/VWF signaling leads to the mobilization of intracellular Ca<sup>2+</sup>, platelet shape change, and activation of integrin {alpha}IIb{beta}3." Filamin binds 570-580<br/>Human platelets were tested for 14-3-3 expression and all isoforms found except sigma.<br/>CHO cells were tested and they found all isoforms except sigma. S587A/S590A double mutant abolished co-ip of endogenous 14-3-3s in CHO cells as did deletion of S605-610.<br/>RLpS<sup>166</sup>LTDP, RYSGHSL<sup>610</sup>-COOH<br/>In Yuan et al (2009) the R557GpSLP561 sequence is reported to bind to 14-3-3 (with pS equivalent to pSer575 in P07359).</p> <p><b>References to 14-3-3-binding to GPIb alpha subunit of platelet membrane glycoprotein Ib</b><br/>Bialkowska K, Zaffran Y, Meyer SC, Fox JE. 14-3-3 zeta mediates integrin-induced activation of Cdc42 and Rac. Platelet glycoprotein Ib-IX regulates integrin-induced signaling by sequestering 14-3-3 zeta. <i>J Biol Chem.</i> 2003 Aug 29;278(35):33342-5<br/>Dai K, Bodnar R, Berndt MC, Du X. A critical role for 14-3-3 zeta protein in regulating the VWF binding function of platelet glycoprotein Ib-IX and its therapeutic implications. <i>Blood.</i> 2005 Sep 15;106(6):1975-81.<br/>Mu FT, Andrews RK, Arthur JF, Munday AD, Cranmer SL, Jackson SP, Stomski FC, Lopez AF, Berndt MC. A functional 14-3-3 zeta-independent association of PI3-kinase with glycoprotein Ib alpha, the major ligand-binding subunit of the platelet glycoprotein Ib-IX-V complex. <i>Blood.</i> 2008 May 1;111(9):4580-7. Epub 2008 Feb 25.<br/>Mangin PH, Receveur N, Wurtz V, David T, Gachet C, Lanza F. Identification of five novel 14-3-3 isoforms interacting with the GPIb-IX complex in Platelets. <i>J Thromb Haemost.</i> 2009 Jun 24. [Epub ahead of print]<br/>Yuan Y, Zhang W, Yan R, Liao Y, Zhao L, Ruan C, Du X, Dai K. Identification of a Novel 14-3-3 {zeta} Binding Site Within the Cytoplasmic Domain of Platelet Glycoprotein Ib {alpha} That Plays a Key Role in Regulating the von Willebrand Factor Binding Function of Glycoprotein Ib-IX. <i>Circ Res.</i> 2009 Oct 29. [Epub ahead of print]</p> |                                            |
| <p><b>Human Gremlin 1 14-3-3-binding sites not defined precisely</b><br/>Gremlin 1 <b>14-3-3-binding sites not defined precisely</b></p> <p><b>References to 14-3-3 binding to Gremlin 1</b><br/>Namkoong H, Shin SM, Kim HK, Ha SA, Cho GW, Hur SY, Kim TE, Kim JW. The bone morphogenetic protein antagonist gremlin 1 is overexpressed in human cancers and interacts with YWHAH protein. <i>BMC Cancer.</i> 2006 Mar 18;6:74.</p>                                                                                                                                                                                                                                                                                                                                                                                                                                                                                                                                                                                                                                                                                                                                                                                                                                                                                                                                                                                                                                                                                                                                                                                                                                                                                                                                                                                                                                                                                                                                                                                                                                                                                                                                                                                                                                                                                                                                                                                                                                                                                                                                                                                                                                                                                                                                                                                                                                                                                                                                                                                                                                                                                                                                                                                                                                                                                                                                                                                                                                                                                                                                                                                                                                                                                                                                                                                                                                                                                                                                                                                                                                                                                                                                                                                                                                                                                                                                                                                                                                                                                                                                                                                                                                                                                                                                                                                                                                                                                                                                            | <p>SITES NOT REPORTED. NOT IN WEBLOGO.</p> |
| <p><b>Human GRIN2C</b> (NMDAR2C) NMDA receptor subunit 2C (Swissprot = Q14957)</p> <p>1 MGGALGPALL LTSLFGAWAG LGPGQGEQGM TVAVVFSSSG PPQAQFRARL TPQSFLDLPL<br/>61 EIQPLTVGVN TTNPSSLLTQ ICGLLGAHV HGIVFEDNVD TEAVAQILDF ISSQTHVPIL</p>                                                                                                                                                                                                                                                                                                                                                                                                                                                                                                                                                                                                                                                                                                                                                                                                                                                                                                                                                                                                                                                                                                                                                                                                                                                                                                                                                                                                                                                                                                                                                                                                                                                                                                                                                                                                                                                                                                                                                                                                                                                                                                                                                                                                                                                                                                                                                                                                                                                                                                                                                                                                                                                                                                                                                                                                                                                                                                                                                                                                                                                                                                                                                                                                                                                                                                                                                                                                                                                                                                                                                                                                                                                                                                                                                                                                                                                                                                                                                                                                                                                                                                                                                                                                                                                                                                                                                                                                                                                                                                                                                                                                                                                                                                                                            |                                            |

|                                                                                                                                                                                                                                                                                                                                                                                                                                                                                                                                                                                                                                                                                                                                                                                                                                                                                                                                                                                                                                                                                                                                                                                                                                                                                                                                                                                                                                                                                                                                                                                                                                                                                                                                                                                                                                                                                                                                                                                                                                                                                                                                                                                                                                                                                                                                                                                                                                                                                                                                                                                                                                                                                                                                                                                                                                                                                                                                                                                                                                                                                                                                                                                                                                                                                                                                                                                                                                                                                                                                                                                                                                                                                                                                  |                                                                                                                                                                                                                                                                                                                                                                                                                                                                                                                                                                                                                                                                                                                                                                                                                                                                                                                                                                                                                                                                                                                                                                                                                                                                                                                                                                                                                                                                                                                                                                                                                                                                                                                                                                                                                                                                                                                                                                                                                                                                                                                                                                                          |
|----------------------------------------------------------------------------------------------------------------------------------------------------------------------------------------------------------------------------------------------------------------------------------------------------------------------------------------------------------------------------------------------------------------------------------------------------------------------------------------------------------------------------------------------------------------------------------------------------------------------------------------------------------------------------------------------------------------------------------------------------------------------------------------------------------------------------------------------------------------------------------------------------------------------------------------------------------------------------------------------------------------------------------------------------------------------------------------------------------------------------------------------------------------------------------------------------------------------------------------------------------------------------------------------------------------------------------------------------------------------------------------------------------------------------------------------------------------------------------------------------------------------------------------------------------------------------------------------------------------------------------------------------------------------------------------------------------------------------------------------------------------------------------------------------------------------------------------------------------------------------------------------------------------------------------------------------------------------------------------------------------------------------------------------------------------------------------------------------------------------------------------------------------------------------------------------------------------------------------------------------------------------------------------------------------------------------------------------------------------------------------------------------------------------------------------------------------------------------------------------------------------------------------------------------------------------------------------------------------------------------------------------------------------------------------------------------------------------------------------------------------------------------------------------------------------------------------------------------------------------------------------------------------------------------------------------------------------------------------------------------------------------------------------------------------------------------------------------------------------------------------------------------------------------------------------------------------------------------------------------------------------------------------------------------------------------------------------------------------------------------------------------------------------------------------------------------------------------------------------------------------------------------------------------------------------------------------------------------------------------------------------------------------------------------------------------------------------------------------|------------------------------------------------------------------------------------------------------------------------------------------------------------------------------------------------------------------------------------------------------------------------------------------------------------------------------------------------------------------------------------------------------------------------------------------------------------------------------------------------------------------------------------------------------------------------------------------------------------------------------------------------------------------------------------------------------------------------------------------------------------------------------------------------------------------------------------------------------------------------------------------------------------------------------------------------------------------------------------------------------------------------------------------------------------------------------------------------------------------------------------------------------------------------------------------------------------------------------------------------------------------------------------------------------------------------------------------------------------------------------------------------------------------------------------------------------------------------------------------------------------------------------------------------------------------------------------------------------------------------------------------------------------------------------------------------------------------------------------------------------------------------------------------------------------------------------------------------------------------------------------------------------------------------------------------------------------------------------------------------------------------------------------------------------------------------------------------------------------------------------------------------------------------------------------------|
| <p>121 SISGGSAVVL TPKEPGSAFL QLGVSLEQQ LQVLFKVVLEEY DWSAFVAVITS LHPGHALFLE</p> <p>181 GVRVADASH VSWRLLDVVT LELGPGGPR RTQRLRLRQLD APVVFVAYCSR EAEVLFVFAEA</p> <p>241 AQAGLVGPGH VWLVPNLALG STDAPPATFP VGLISVVVTE WRLSLRQKVR DGVAILALGA</p> <p>301 HSYWRQHGTLPAPAGDCRVH PGPVSPAREA FYRHLLNVTW EGRDFSFSPG GYLVQPTMNV</p> <p>361 IALNRHRLWE MVGRWEHGV LYMKYVWPVRY SASLQPVVDS RHLTVATLEE RPFVIVESPD</p> <p>421 PGTGGCVPNT VPCRQSNHT FSSGDVAPYT KLCKKGF CID ILKKLARVVK FSYDLYLVTN</p> <p>481 GKHGKRVGV WNGMIGEVY KRADMAIGSL TINEERSEIV DFSVPFVETG ISVMVARSNG</p> <p>541 TVSPSAFLEP YSPAVVMMF VMCLTVVAIT VFMFEYFSPV SYNQNLTRGK KSGGPAFTIG</p> <p>601 KSVWLLWALV FNNSVPIENP RGTTSKIMVL VWAFFAVIFL ASYTANLAAF MIQEYIDTV</p> <p>661 SGLSDKFKQR PQDQYPPFR GTVPNGSTER NIRSRYRDMH THMVKNFQRS VEDALTS LKM</p> <p>721 GKLDAFIYDA AVLNVMAGK DECKLVTIGS GKVFATTGYG IAMQKDSHWK RAIDLALLQF</p> <p>781 LGDGETQKLE TVWLSGICQN EKNEVMSSKL DIDNMAGVYF MLLVAMGLAL LVFAWEHLVY</p> <p>841 WKLRHSVPNS QLDFLLAFS RGIYSCFSGV QSLASPPRQA SPDLTASSAQ ASVLKMLQAA</p> <p>901 RDMVTTAGVS SSLDRATRIT ENWGGRRAP PPSPCPTPRS GPSCLPTPD PPEPSPPTGW</p> <p>961 GPPDGGRAAL VRRAPQPPGR PPTPGPPLSD VSRVSRPAW EARWVVRTGH CGRHLSASER</p> <p>1021 PLSPARCHYS SFPRADRSR PFLPLFPEPP ELEDLPLLGP EQLARREAL HAAWARGSRP</p> <p>1081 RHA5LPSSVA EAFARPSSLP AGCTGPACAR PDGHSACRRL AQAQSMCLPI YREACQEGEQ</p> <p>1141 AGAPAWQHRQ HVCLHAHAHL PFCWGAVCPH LPPCASHGSW LSGAWGPLGH RGRTLGLGTG</p> <p>1201 YRDSGGLDEI SRVARGTQGF PGPCTWRRIS SLESEV</p> <p>&gt;gi 215274091 sp Q14957.2 NMDE3 HUMAN RecName: Full=Glutamate [NMDA] receptor subunit epsilon-3; AltName: Full=N-methyl D-aspartate receptor subtype 2C; Short=NMDAR2C; Short=NR2C; Flags: Precursor</p> <p>MGGALGPALLLTSFLGAWAGLPGQGEQGMVAVVFSSSGPPAQFRARLTPOSFLDLPLEIQPLTVGVN</p> <p>TTPSSLLTQICGLLGAHVHIVFEDNVDTEAVAQILDFISSQTHVPILSISGGSVAVLTPKEPGSAFL</p> <p>QLGVSLEQQ LQVLFKVVLEEYDWSAFVAVITSLHPGHALFLEGVRAVADASHVSWRLLDVVTLELPGGPR</p> <p>RTQRLRLRQLDAPVVFVAYCSR EAEVLFVFAEA AQAGLVGPGH VWLVPNLALG STDAPPATFP VGLISVV</p> <p>TES WRLSLRQKVR DGVAILALGA HSYWRQHGTLPAPAGDCRVH PGPVSPAREAFYRHLLNVTWEGRDFSFSPG</p> <p>GYLVQPTMNVIALNRHRLWE MVGRWEHGV LYMKYVWPVRY SASLQPVVDS RHLTVATLEERPFVIVESPD</p> <p>PGTGGCVPNTVPCRQSNHTFSSGDVAPYTKLCKKGF CID ILKKLARVVKFSYDLYLVNKGHGKRVGV</p> <p>WNGMIGEVYKRADMAIGSLTINEERSEIVDFSVPFVETGISVMVARSNGTVSPSAFLEPYSPAVVMMF</p> <p>VMCLTVVAITVFMFEYFSPVSYNQNLTRGKSGGPAFTIGKSVWLLWALVFNNSVPIENPRGTTSKIMVL</p> <p>VWAFFAVIFLASYTANLAAFMIQEYIDTVSGLSDKFKQR PQDQYPPFRGTVPNGSTERNIRSRYRDMH</p> <p>THMVKNFQRSVEDALTS LKM GKLDAFIYDA AVLNVMAGKDECKLVTIGSGKVFATTGYGIAMQKDSHWK</p> <p>RAIDLALLQFLGDGETQKLETVWLSGICQNEKNEVMSSKL DIDNMAGVYF MLLVAMGLAL LVFAWEHLVY</p> <p>WKLRHSVPNS QLDFLLAFSRGIYSCFSGVQSLASPPRQASPDLTASSAQASVLKMLQAARDMVTTAGVS</p> <p>SSLDRATRITENWGGRRAPPSPCPTPRSGPSPCLPTPD PPEPSPPTGWGPPDGGRAALVRRAPQPPGR</p> <p>PPTPGPPLSDVSRVSRPAWEARWVVRTGHCGRHLSASERPLSPARCHYSFPRADRSR PFLPLFPEPP</p> <p>ELEDLPLLGP EQLARREALHAAWARGSRPRHASLPSSVAEAFARPSSLPAGCTGPACARPDGHSACRRL</p> <p>AQAQSMCLPIYREACQEGEQAGAPAWQHRQHVCVCLHAHAHL PFCWGAVCPH LPPCASHGSW LSGAWGPLGH</p> <p>RGRTLGLGTGYRDSGGLDEISRVARGTQGF PGPCTWRRIS SLESEV</p> <p><b>Notes</b></p> <p>Chen and Roche (2009) demonstrate that PKB/Akt directly phosphorylates NR2C on serine 1096 (WARGRPRHA(S1096)LPSSVAEAF). "In addition, we identify 14-3-3epsilon as an NR2C interactor, whose binding is dependent on S1096 phosphorylation." Ser1096 = Ser1084 in Q14957 (WARGSRPRHA(s1084)LPSSVA).</p> <p><b>References to 14-3-3 binding to NR2C</b></p> <p>Chen BS, Roche KW. Growth factor-dependent trafficking of cerebellar NMDA receptors via protein kinase B/Akt phosphorylation of NR2C. <i>Neuron</i>. 2009 May 28;62(4):471-8.</p> | <p><b>Human HDAC4</b> Histone deacetylase 4 (Swissprot = P56524)</p> <p>1 MSSQSHPDGL SGRDQVPELL NPARVNHMPS TVDVATALPL QVAPSAPVMD LRLDHQFSLP</p> <p>61 VAEAPALREQQ LQQELLALKQ KQQIQRQILI AEFQRQHEQL SRQHEAQLHE HIKQQQEMLA</p> <p>121 MKHQELLEH QRKLERHRQE QELEKQHRQE KLQQLKNEKE GKESAVASTE VKMKLQEFVL</p> <p>181 NKKKALAHRN LNHCISSDPR YWYKGTQHS LDQSSPPQSG VSTSYNHPVL GMYDAKDDFP</p> <p>241 LRKTA5EPNL KLRSLKQKV AERRSSPLL RKDGPVV TAL KKRPLDVTDS ACSSAPGSGP</p> <p>301 SSPNNSGVS SAENGIAPAV PSIPAETS LA HRLVAREGSA APLPLYTSPS LPNITLGLPA</p> <p>361 TGPSAGTAGQ QDTERLTPLA LQQRSLFPG THLTPYLSTS PLERDGGAAH SPLLQHMVLL</p> <p>421 EQPPAQAPLV TGLGALPLHA QSLVGADRVPS IHLKLRQHR PLGRTO5APL PQNAQALQHL</p> <p>481 VIQQHQHQFL EKHKQFQFQQ QLQMNKII PK PSEPARQPES HPEETEELR EQQALLDEPY</p> <p>541 LDRLPGQKEA HAQAGVQVKQ EPIESDEEEA EPPREVEPGQ RQPSEQELLF RQQALLLEQQ</p> <p>601 RIHQRLRNYQA SMEAAGIPVS FGHRPLSRA QSSPASATFP VSVQEPPTKP RFTTGLVYDT</p> <p>661 LMLKHQCTCG SSSSHPEHAG RIQSIWSRLQ ETGLRGKCEC IRGRKATLEE LQTVHSEAH</p> <p>721 LLYGTNPLNR QKLDSSKLLG SLASVVRVLP CGGVGVSDT IWNEVHSA ARLAVGCVVE</p> <p>781 LVFKVATGEL KNGFAVVRPP GHAEESTPM GFCYFNVAV AAKLLQQLS VSKILIVDWD</p> <p>841 VHHGNGTQQA FYSDFSVLYM SLHRYDDGNF FPGSGAPDEV GTGPGVGFNV NMAFTGLDLP</p> <p>901 PMGDAEYLAA FRTVVMPIAS EFAFDVVLVS SGFDAVEGHP TPLGGYNLSA RCFGYLTKQL</p> <p>961 MLAGGRIVL ALEGGHDLTA ICDASEACVS ALLGNELDPL PEKVLQQRPN ANAVRSMKV</p> <p>1021 MEIHSKYWRC LQRTTSTAGR SLIEAQTEN EEAETVTAMA SLSVGVKPAE KRPDEEPMEE</p> <p>1081 EPPL</p> <p>&gt;gi 11182425 sp P56524.2 HDAC4_HUMAN RecName: Full=Histone deacetylase 4; Short=HD4</p> <p>MSSQSHPDGLSGRDQVPELLNPARVNHMPS TVDVATALPLQVAPSAPVMDLRLDHQFSLPVAEAPALREQQ</p> <p>LQQELLALKQKQQIQRQILIAEFQRQHEQLSRQHEAQLHEHIKQQQEMLAMKHQELLEHQRKLERHRQE</p> <p>QELEKQHRQEKLQQLKNEKEGKESAVASTE VKMKLQEFVLNKKKALAHRN LNHCISSDPRYWYKGTQHS</p> <p>LDQSSPPQSGVSTSYNHPVLGMYDAKDDFPLRKTASEPNLKLRSRLKQKVAERRSSPLLRRKDGPPV TAL</p> <p>KKRPLDVTDSACSSAPGSGPSSPNNSGVS SAENGIAPAVPSIPAETS LAHRLVAREGSAAPLPLYTSPS</p> <p>LPNITLGLPATGPSAGTAGQDTERLTPLPALQQRSLFPGTHLTPYLSTS PLERDGGAAH SPLLQHMVLL</p> <p>EQPPAQAPLV TGLGALPLHAQSLVGADRVPS IHLKLRQHRPLGRTO5APL PQNAQALQHLVIQQHQHQFL</p> |
|----------------------------------------------------------------------------------------------------------------------------------------------------------------------------------------------------------------------------------------------------------------------------------------------------------------------------------------------------------------------------------------------------------------------------------------------------------------------------------------------------------------------------------------------------------------------------------------------------------------------------------------------------------------------------------------------------------------------------------------------------------------------------------------------------------------------------------------------------------------------------------------------------------------------------------------------------------------------------------------------------------------------------------------------------------------------------------------------------------------------------------------------------------------------------------------------------------------------------------------------------------------------------------------------------------------------------------------------------------------------------------------------------------------------------------------------------------------------------------------------------------------------------------------------------------------------------------------------------------------------------------------------------------------------------------------------------------------------------------------------------------------------------------------------------------------------------------------------------------------------------------------------------------------------------------------------------------------------------------------------------------------------------------------------------------------------------------------------------------------------------------------------------------------------------------------------------------------------------------------------------------------------------------------------------------------------------------------------------------------------------------------------------------------------------------------------------------------------------------------------------------------------------------------------------------------------------------------------------------------------------------------------------------------------------------------------------------------------------------------------------------------------------------------------------------------------------------------------------------------------------------------------------------------------------------------------------------------------------------------------------------------------------------------------------------------------------------------------------------------------------------------------------------------------------------------------------------------------------------------------------------------------------------------------------------------------------------------------------------------------------------------------------------------------------------------------------------------------------------------------------------------------------------------------------------------------------------------------------------------------------------------------------------------------------------------------------------------------------------|------------------------------------------------------------------------------------------------------------------------------------------------------------------------------------------------------------------------------------------------------------------------------------------------------------------------------------------------------------------------------------------------------------------------------------------------------------------------------------------------------------------------------------------------------------------------------------------------------------------------------------------------------------------------------------------------------------------------------------------------------------------------------------------------------------------------------------------------------------------------------------------------------------------------------------------------------------------------------------------------------------------------------------------------------------------------------------------------------------------------------------------------------------------------------------------------------------------------------------------------------------------------------------------------------------------------------------------------------------------------------------------------------------------------------------------------------------------------------------------------------------------------------------------------------------------------------------------------------------------------------------------------------------------------------------------------------------------------------------------------------------------------------------------------------------------------------------------------------------------------------------------------------------------------------------------------------------------------------------------------------------------------------------------------------------------------------------------------------------------------------------------------------------------------------------------|

|                                                                                                                                                                                                                                                                                                                                                                                                                                                                                                                                                                                                                                                                                                                                                                                                                                                                                                                                                                                                                                                                                                                                                                                                                                                                                                                                                                                                                                                                                                                                                                                                                                                                                                                                                                                                                                                                                                                                                                                                                                                                                                                                                                                                                                                                                                                                                                                                                                                                                                                                                                                                                                                                                                                                                                                                                                                                                                                                                        |  |
|--------------------------------------------------------------------------------------------------------------------------------------------------------------------------------------------------------------------------------------------------------------------------------------------------------------------------------------------------------------------------------------------------------------------------------------------------------------------------------------------------------------------------------------------------------------------------------------------------------------------------------------------------------------------------------------------------------------------------------------------------------------------------------------------------------------------------------------------------------------------------------------------------------------------------------------------------------------------------------------------------------------------------------------------------------------------------------------------------------------------------------------------------------------------------------------------------------------------------------------------------------------------------------------------------------------------------------------------------------------------------------------------------------------------------------------------------------------------------------------------------------------------------------------------------------------------------------------------------------------------------------------------------------------------------------------------------------------------------------------------------------------------------------------------------------------------------------------------------------------------------------------------------------------------------------------------------------------------------------------------------------------------------------------------------------------------------------------------------------------------------------------------------------------------------------------------------------------------------------------------------------------------------------------------------------------------------------------------------------------------------------------------------------------------------------------------------------------------------------------------------------------------------------------------------------------------------------------------------------------------------------------------------------------------------------------------------------------------------------------------------------------------------------------------------------------------------------------------------------------------------------------------------------------------------------------------------------|--|
| <p>EKKHQFQQQQQLQMNKII PKPSEPARQPESHPEETEELREHQALDEPYLDRLPGQKEAHAQAGVQVKQ<br/> EPIESDEEEAEPPREVEPGQRQSEQELLFRQQALLLEQQRIHQLRNYQASMEAAGIPVSVFGGHRPLSRA<br/> QSSPASATFPVSVQEPFPTKPRFTTGLVYDTLMLKHQCTCGSSSSSHPEHAGRIQSIWSRLETGLRGKCEC<br/> IRGRKATLEELQTVHSEAHLLTYGNTPLNRQKLDKSKLLGSLASVFRVRLPCGGVGVSDT IWNEVHSAGA<br/> ARLAVGCVVELVFKVATGELKNGFVAVRPPGHHAEEESTPMGFCYFNVSVAAKLLQQRSLVSKILIVDWD<br/> VHHNGTQQAFYSDPSVLYMSLHRYDDGNFFPGSGAPDEVTGPGVGFNVNMAFTGGLDPPMGDAEYLA<br/> FRTVVMPIASEFADVVVLSGFDAVEGHPTPLGGYNLSARCFGYLTKQLMGLAGGRIVLALEGGHDLTA<br/> ICDASEACVSALLGNELDPLPEKVLQQRPNANAVRSMEKVMIEHSKYWRCLQRTTSTAGRSLIEAQTCCN<br/> EEAETVTAMASLSVGVKPAEKRPDEEPMEEEPPL</p>                                                                                                                                                                                                                                                                                                                                                                                                                                                                                                                                                                                                                                                                                                                                                                                                                                                                                                                                                                                                                                                                                                                                                                                                                                                                                                                                                                                                                                                                                                                                                                                                                                                                                                                                                                                                                                                                                                                                                                                                                                                                                                                                                                                                                                                                                  |  |
| <p><b>References to 14-3-3-binding (see entry for HDAC9)</b></p>                                                                                                                                                                                                                                                                                                                                                                                                                                                                                                                                                                                                                                                                                                                                                                                                                                                                                                                                                                                                                                                                                                                                                                                                                                                                                                                                                                                                                                                                                                                                                                                                                                                                                                                                                                                                                                                                                                                                                                                                                                                                                                                                                                                                                                                                                                                                                                                                                                                                                                                                                                                                                                                                                                                                                                                                                                                                                       |  |
| <p><b>Human HDAC5</b> Histone deacetylase 5 (Swissprot = Q9UQL6)</p> <p>1 MNSPNE SDGM SGR EPSLEIL PRTSLHSIPV TVEVKPVLPR AMPSSMGGGG GGSPSPVELR<br/> 61 GALVGSVDPT LREQLLQQL LALKQQQLQ KQLLFAEFQK QHDHLTRQHE VQLQKHLKQQ<br/> 121 QEMLAAKQQQ EMLAAKRQE LEQQRQREQQ RQEELEKQRL EQQLLILRNK EKSKEAIAI<br/> 181 TEVKLRQLQEF LLSKSKEPTP GGLNHSLPQH PKCWGAHHA LDQSSPPQSG PPGTPPSYKL<br/> 241 PLPGPYDSR DFPLRKTASE PNLKVRSLK QKVAERRSSP LLRRKDGTVI STFKKRAVEI<br/> 301 TGAGPGASSV CNSAPGSGPS SPNSHSTIA ENGFTGSVFN IPTEMPLQHR ALPLDSSPNQ<br/> 361 FSLYTSPSLP NISLGLQATV TVTNSHLTAS PKLSTQQEAE RQALQSLRQG GTLTGKFMST<br/> 421 SSIPGCLLVH ALEGDGSPHG HASLLQHVLL LEQARQQSTL IAVPLHGQSP LVTGERVATS<br/> 481 MRTVGKLRPH RPLSRQSSP LPQSPQALQQ LVMQQQHQQF LEKQKQQQLQ LGKILTKTGE<br/> 541 LPRQPTTHPE ETEEELTEQQ EVLLGEGALT MPREGSTESE STQEDLEEED EEDGEEEED<br/> 601 CIQVKDEEGE SGAEEGPDLE EPGAGYKCLF SDAQPLQLPQ VYQAPLSLAT VPHQALGRTO<br/> 661 SSPAAPGGMK SPPDQPVKHL FTTGVVYDTF MLKHQCMCGN THVHPEHAGR IQSIWSRLQE<br/> 721 TGLLSKCRIR RGRKATLDEI QTVHSEYHTL LYGTSPNLNRQ KLDKSKLLGP ISQKMYAVLP<br/> 781 CGGIGVSDT VWNEMHSSA VRMAVGCLLE LAFKVAAGEL KNGFAIRPP GHHAESTAM<br/> 841 GFCFFNSVAI TAKLLQKLN VGKVLIVDWD IHGNGTQQA FYNDPSVLYI SLHRYDNGNF<br/> 901 FPGSGAPEEV GGGPGVGVNV NVAWTGGVDP PIGDVEYLTA FRTVVMPIAH EFPDVLVLS<br/> 961 AGFDAVEGHL SPLGGYSVTA RCFGHLTRQL MTLAGGRVVL ALEGGHDLTA ICDASEACVS<br/> 1021 ALLSVELQPL DEAVLQKPN INAVATLEKV IEIQSKHWSC VQKFAAGLGR SLREAQAGET<br/> 1081 EEAETVSAMA LLSVGAEQAA AAAAREHSPR PAEPEMQEP AL</p> <p>&gt;gi 10720027 sp Q9UQL6.1 HDAC5_HUMAN RecName: Full=Histone deacetylase 5;<br/> Short=HD5; AltName: Full=Antigen NY-CO-9</p> <p>MNSPNE SDGMSGR EPSLEILPRTSLHSIPVTVEVKPVLPRAMPSSMGGGGGGSPSPVELRGALVGSVDPT<br/> LREQLLQQLLALKQQQLQKQLLFAEFQKQHDHLTRQHEVQLQKHLKQQQEMLAAKQQQEMLAAKRQE<br/> LEQQRQREQQRQEELEKQRLLEQQLLILRNKEKSKEAIASTEVKLRQLQEFLLSKSKEPTPGGLNHSLPQH<br/> PKCWGAHHA SLDQSSPPQSGPPGTPPSYKLPPLPGPYDSRDFPLRKTASEPNLKVRSLKQKVAERRSSP<br/> LLRRKDGTVISTFKKRAVEITGAGPGASSV CNSAPGSGPS SPNSHSTIAENGFTGSVFN IPTEMPLQHR<br/> ALPLDSSPNQFSLYTSPSLPNISLGLQATVTVTNSHLTASPKLSTQQEAEERQALQSLRQGGTLTGKFMST<br/> SSIPGCLLVH ALEGDGSPHG HASLLQHVLLLEQARQQSTL IAVPLHGQSP LVTGERVATSMRTVGKLRPH<br/> RPLSRQSSPLPQSPQALQQLVMQQQHQQFLEKQKQQQLQLGKILTKTGE LPRQPTTHPEETEELTEQQ<br/> EVLLGEGALTMPREGSTESESTQEDLEEDEEEDGEEEDC IQVKDEEGESGAEEGPDLEEPGAGYKCLF<br/> SDAQPLQLPQVYQAPLSLATVPHQALGRTOSSPAAPGGMKSPDQPVKHLFTTGVVYDTF MLKHQCMCGN<br/> THVHPEHAGRIQSIWSRLQETGLLSKCRIRGRKATLDEI QTVHSEYHTL LYGTSPNLNRQKLDKSKLLGP<br/> ISQKMYAVLP CGGIGVSDTVWNEMHSSAVRMAVGCLLELAFKVAAGELKNGFAIRPPGHHAESTAM<br/> GFCFFNSVAITAKLLQKLVNKGKVLIVDWD IHGNGTQQA FYNDPSVLYI SLHRYDNGNF FPGSGAPEEV<br/> GGGPGVGVNV NVAWTGGVDP PIGDVEYLTA FRTVVMPIAH EFPDVLVLS AGFDAVEGHL SPLGGYSVTA<br/> RCFGHLTRQL MTLAGGRVVL ALEGGHDLTA ICDASEACVS ALLSVELQPL DEAVLQKPN INAVATLEKV<br/> IEIQSKHWSC VQKFAAGLGR SLREAQAGET EEAETVSAMA LLSVGAEQAA AAAAREHSPR PAEPEMQEP<br/> AL</p> |  |
| <p><b>References to 14-3-3-binding (see entry for HDAC9)</b></p>                                                                                                                                                                                                                                                                                                                                                                                                                                                                                                                                                                                                                                                                                                                                                                                                                                                                                                                                                                                                                                                                                                                                                                                                                                                                                                                                                                                                                                                                                                                                                                                                                                                                                                                                                                                                                                                                                                                                                                                                                                                                                                                                                                                                                                                                                                                                                                                                                                                                                                                                                                                                                                                                                                                                                                                                                                                                                       |  |
| <p><b>Human HDAC7</b> Histone deacetylase 7 (Swissprot = Q8WUI4)</p> <p>1 MDLRVGRPP VEPPPEPTLL ALQRPQRLHH HFLAGLQQQ RSVEPMRLSM DTPMPELQVG<br/> 61 PQEQELRQLL HKDKSKRS AV ASSVVKQKLA EVILKKQQA LERTVHPNSP GIPYRTLEPL<br/> 121 ETEGATRSM SFLPPVPSL PSDPPEHFPL RKTVSEPNLK LRYKPKKSLE RRKNPLLRKE<br/> 181 SAPPSLRRR AETLGDSSPS SSSTPASGCS SPNDSEHGPN PILGSEALLG QRLRLQETS<br/> 241 APFALPTVSL LPAITLGLPA PARADSDRRT HPTLGRGPI LGSPTPLFL PHGLEPEAGG<br/> 301 TLP SRLQPI LLDPSGSHAP LLTVPGGLPL PFHFAQSLMT TERLSGSLH WPLSRTRSEP<br/> 361 LPPSATAPP PGMPQRLEQ LKTHVQVIKR SAKPSEKPRL RQIPSAEDLE TDGGGPGQVV<br/> 421 DDGLEHREL HGQPEARGPA PLQHPQVLL WEQRLAGRL PRGSTGDTVL LPLAQGGHRP<br/> 481 LSRAQSPAA PASLSAPEPA SQARVLSSE TPARTLPFTT GLIYDSVMLK HQSCGDNRS<br/> 541 HPEHAGRIQS IWSRLQERGL RSQCECLRGR KASLEELQSV HSERHVLLYG TNPLSRLKLD<br/> 601 NGKLAGLLAQ RMFVMLPCGG VGVDTDTIWN ELHSSNAARW AAGSVTLAF KVASRELKNG<br/> 661 FAVVRPPGH ADHSTAMGFC FNSVAIACR QLQQSKASK ILIVDWDVHH NGTQQTFYQ<br/> 721 DPSVLYISLH RHDDGNFFPG SGAVDEVGAG SGEFNVNVA WAGGLDPPMG DPEYLAAFRI<br/> 781 VVMPIAREFS PDLVLSAGF DAAEGHPAPL GGYHVSACF GYMTQQLMNL AGGAVVLALE<br/> 841 GGHDLTAICD ASEACVAALL GNRVDPLSEE GWKQKPNLNA IRSLEAVIRV HSKYWGCMQR<br/> 901 LASC PDSWVP RVPADKEEV EAVTALASLS VGILAEDRPS EQLVEEEPEM NL</p> <p>&gt;gi 30913097 sp Q8WUI4.2 HDAC7_HUMAN RecName: Full=Histone deacetylase 7;<br/> Short=HD7; AltName: Full=HD7a</p> <p>MDLRVGRPPVEPPPEPTLLALQRPQRLHHHFLAGLQQQRSVEPMRLSMDTPMPELQVGPQEQELRQLL<br/> HKDKSKRS AVASSVVKQKLA EVILKKQQAALERTVHPNSPGIPYRTLEPLETEGATRSMSSFLPPVPSL<br/> PSDPEHFPLRKTVSEPNLKRLRYKPKKSLEERRKNPLLRKESAPPSLRRRPAETLGDSSPSSSSTPASGCS<br/> SPNDSEHGPNPILGSEALLGQRLRLQETS VAPFALPTVSL LPAITLGLPAPARADSDRRTHTPLGRGPI<br/> LGSPTPLFLPHGLEPEAGGTLPSRLQPI LLDPSGSHAPLLTVPGGLPLPFHFAQSLMTTERLSGSLH<br/> WPLSRTRSEPLPPSATAPP PGMQRLEQLKTHVQVIKR SAKPSEKPRLRQIPSAEDLETDGGGPGQVV<br/> DDGLEHRELGHGQPEARGPAPLQHPQVLLWEQRLAGRLPRGSTGDTVLPLAQGGHRPLSRAQSSPAA<br/> PASLSAPEPASQARVLSSETPARTLPFTTGLIYDSVMLKHQCSGDNRSRHPHAGRIQSIWSRLQERGL</p>                                                                                                                                                                                                                                                                                                                                                                                                                                                                                                                                                                                                                                                                                                                                                                                                                                                                                                                   |  |

|                                                                                                                                                                                                                                                                                                                                                                                                                                                                                                                                                                                                                                                                                                                                                                                                                                                                                                                                                                                                                                                                                                                                                                                                                                                                                                                                                                                                                                                                                                                                                                                                                                                                                                                                                                                                                                                                                                                                                                                                                                                                                                                                                                                                                                                                                                                                                                                                                                                                                                                                                                                                                                                                                                                                                                                                                                                         |  |
|---------------------------------------------------------------------------------------------------------------------------------------------------------------------------------------------------------------------------------------------------------------------------------------------------------------------------------------------------------------------------------------------------------------------------------------------------------------------------------------------------------------------------------------------------------------------------------------------------------------------------------------------------------------------------------------------------------------------------------------------------------------------------------------------------------------------------------------------------------------------------------------------------------------------------------------------------------------------------------------------------------------------------------------------------------------------------------------------------------------------------------------------------------------------------------------------------------------------------------------------------------------------------------------------------------------------------------------------------------------------------------------------------------------------------------------------------------------------------------------------------------------------------------------------------------------------------------------------------------------------------------------------------------------------------------------------------------------------------------------------------------------------------------------------------------------------------------------------------------------------------------------------------------------------------------------------------------------------------------------------------------------------------------------------------------------------------------------------------------------------------------------------------------------------------------------------------------------------------------------------------------------------------------------------------------------------------------------------------------------------------------------------------------------------------------------------------------------------------------------------------------------------------------------------------------------------------------------------------------------------------------------------------------------------------------------------------------------------------------------------------------------------------------------------------------------------------------------------------------|--|
| <p>RSQCECLGRKASLEELQSVHSEHVLLYGTNPLSRKLKLDNGKLAGLLAQRMFVMLPCGGVGVDTDTIWN<br/> ELHSSNAARWAAGSVDTLDFKVASRELKNGFAVVRPPGHHADHSTAMGFCFFNSVAIACRQLQQQSKASK<br/> ILIVDWDVHHGNGTQTFYQDPSVLYISLHRHDDGNFFPGSGAVDEVGAGSGEGFNVNVAWAGGLDPPMG<br/> DPEYLAAFRIIVVMPITAREFSPDLVLSAGFDAEAGHPAPLGGYHVSACFKGYMTQQLMNLGAGVAVLALE<br/> GGHDLTAICDASEACVAALLGNRVDPFSEEGWKQKPNLNAIRSLAIVIRVHSHKYWGCMQRLASCPDSWVP<br/> RVPGADKEVEAVTALASLSVGLAEDRPSEQLVEEEEEPMNL</p>                                                                                                                                                                                                                                                                                                                                                                                                                                                                                                                                                                                                                                                                                                                                                                                                                                                                                                                                                                                                                                                                                                                                                                                                                                                                                                                                                                                                                                                                                                                                                                                                                                                                                                                                                                                                                                                                                                                                                                                                                                                                                                                                                                                                                                                                                                                                                                                                            |  |
| <p><b>References to 14-3-3-binding (see entry for HDAC9)</b></p>                                                                                                                                                                                                                                                                                                                                                                                                                                                                                                                                                                                                                                                                                                                                                                                                                                                                                                                                                                                                                                                                                                                                                                                                                                                                                                                                                                                                                                                                                                                                                                                                                                                                                                                                                                                                                                                                                                                                                                                                                                                                                                                                                                                                                                                                                                                                                                                                                                                                                                                                                                                                                                                                                                                                                                                        |  |
| <p><b>Human HDAC9</b> Histone deacetylase 9 (Swissprot = Q9UKV0)</p> <p>1 MHSMISSVDV KSEVPVGLLEP ISPLDLRDTL RMMMPVDPV VREKQLQQLL LLIQQQQQIQ<br/> 61 KQLLIAEFQK QHENLTRQHQ AQLQEHKEL LAIKQQQELL EKEQKLEQQR QEQUEVERHRR<br/> 121 EQQLPPLRGK DRGRERAVAS TEVKQKLEF LLSKSKATKDT PTNGKNHVS RHPKLWYTAA<br/> 181 HHTSLDQSSP PLSGTSPSYK YTLPGAQDAK DDFPLRKTAS EPNLKVRSRL KQKVAERSS<br/> 241 PLLRRKDGTV VTSFKKRMFE VTSSVSSSS PGSGPSSPNN GPTGSVTENE TSVLPPTPHA<br/> 301 EQMVSQQRIL IHEDSMNLLS LYTSPSLPNI TLGLPAVPSQ LNASNSLKEK QKCETQTLRQ<br/> 361 GVPLPGQYGG SIPASSSHPH VTLEGGKPPNS SHQALLQHLL LKEQMRQKQL LVAGGVPLHP<br/> 421 QSPLATKERI SPGIRGTHKL PRRHPLNRTQ SAPLPQSTLA QLVIQQQHQQ FLEKQKQYQQ<br/> 481 QIHMNKLKSK SIEQLKQPGS HLEEAEEELQ GDQAMQEDRA PSSGNSTRSD SSACVDDTLG<br/> 541 QVGAVVKKEE PVDSDEDAQI QEMESGEQAA FMGQPFLEPT HTRALSVRQA PLAAVGMGDL<br/> 601 EKHRVLSRTH SSPAASVLPH PAMDRPLQPG SATGIAYDPL MLKHQCVCGN STHPEHAGR<br/> 661 IQSIWSRLQE TGLLNKNCERI QGRKASLEEI QLVHSEHSL LYGTNPLDGG KLDPRILLGD<br/> 721 DSQKFFSSLP CGGLGVSDT IWNELHSSGA ARMAVGCVIE LASKVASGEL KNGFAVVRPP<br/> 781 GHAAEESTAM GFCFFNSVAI TAKYLRDQLN ISKILIVLDL VHHGNGTQQA FYADPSILYI<br/> 841 SLHRYDEGNF PFGSGAPNEV GTGLGEGYNI NIAWTGGLDP PMGDVEYLEA FRTIVKPVAK<br/> 901 EFDPDMVLVS AGFDALLEGHT PPLGGYKVTAKCFGLHTKQL MTLADGRVVL ALEGGHDLTA<br/> 961 ICDASEACVN ALLGNELEPL AEDILHQSPN MNAVISLQKI IETQSMCLKF S</p> <p>&gt;gi 19865267 sp Q9UKV0.2 HDAC9_HUMAN RecName: Full=Histone deacetylase 9;<br/> Short=HD9; AltName: Full=HD7B; Short=HD7; AltName: Full=Histone deacetylase-<br/> related protein; AltName: Full=MEF2-interacting transcription repressor MITR</p> <p>MHSMISSVDV KSEVPVGLLEP ISPLDLRDTL RMMMPVDPV VREKQLQQLL LLIQQQQQIQ KQLLIAEFQK<br/> QHENLTRQHQ AQLQEHKEL LAIKQQQELLEKEQKLEQQRQEQUEVERHRR EQQLPPLRGK DRGRERAVAS<br/> TEVKQKLEF LLSKSKATKDT PTNGKNHVS RHPKLWYTAA HHTSLDQSSP PLSGTSPSYK YTLPGAQDAK<br/> DDFPLRKTASEPNLKVRSRLKQKVAERSS PLLRRKDGTV VTSFKKRMFE VTSSVSSSS PGSGPSSPNN<br/> GPTGSVTENETS VLPPTPHAEQ MVSQQRIL IHEDSMNLLS LYTSPSLPNI TLGLPAVPSQ LNASNSLKEK<br/> QKCETQTLRQGVPLPGQYGG SIPASSSHPHVTLEGGKPPNS SHQALLQHLL LKEQMRQKQL LVAGGVPLHP<br/> QSPLATKERI SPGIRGTHKL PRRHPLNRTQ SAPLPQSTLA QLVIQQQHQQ FLEKQKQYQQQ IHMNKLKSK<br/> SIEQLKQPGSHLEEAEEELQ GDQAMQEDRAPSSGNSTRSDSSACVDDTLGQVAVVKKEE PVDSDEDAQI<br/> QEMESGEQAA FMGQPFLEPT HTRALSVRQA PLAAVGMGDL EKHRVLSRTH SSPAASVLPHPAMDRPLQPG<br/> SATGIAYDPL MLKHQCVCGNSTHPEHAGRIQSIWSRLQETGLLNKNCERI QGRKASLEEI QLVHSEHSL<br/> LYGTNPLDGGKLDPRILLGDDSQKFFSSLP CGGLGVSDT IWNELHSSGA ARMAVGCVIE LASKVASGEL<br/> KNGFAVVRPPGHAAEESTAM GFCFFNSVAI TAKYLRDQLN ISKILIVLDL VHHGNGTQQA FYADPSILYI<br/> SLHRYDEGNF PFGSGAPNEV GTGLGEGYNI NIAWTGGLDPPMGDVEYLEA FRTIVKPVAK EFDPDMVLVS<br/> AGFDALLEGHT PPLGGYKVTAKCFGLHTKQL MTLADGRVVL ALEGGHDLTAICDASEACVN ALLGNELEPL<br/> AEDILHQSPN MNAVISLQKI IETQSMCLKF S</p> |  |
| <p><b>Notes</b></p>                                                                                                                                                                                                                                                                                                                                                                                                                                                                                                                                                                                                                                                                                                                                                                                                                                                                                                                                                                                                                                                                                                                                                                                                                                                                                                                                                                                                                                                                                                                                                                                                                                                                                                                                                                                                                                                                                                                                                                                                                                                                                                                                                                                                                                                                                                                                                                                                                                                                                                                                                                                                                                                                                                                                                                                                                                     |  |
| <p>Specifically, phosphorylation of HDAC5 serines 259 and 498 causes HDAC5 to bind to 14-3-3 and dissociate from MEF2.</p>                                                                                                                                                                                                                                                                                                                                                                                                                                                                                                                                                                                                                                                                                                                                                                                                                                                                                                                                                                                                                                                                                                                                                                                                                                                                                                                                                                                                                                                                                                                                                                                                                                                                                                                                                                                                                                                                                                                                                                                                                                                                                                                                                                                                                                                                                                                                                                                                                                                                                                                                                                                                                                                                                                                              |  |
| <p>Histone deacetylase, HDAC5 RKTAp<sup>259</sup>EP, RTQpS<sup>498</sup>SP</p>                                                                                                                                                                                                                                                                                                                                                                                                                                                                                                                                                                                                                                                                                                                                                                                                                                                                                                                                                                                                                                                                                                                                                                                                                                                                                                                                                                                                                                                                                                                                                                                                                                                                                                                                                                                                                                                                                                                                                                                                                                                                                                                                                                                                                                                                                                                                                                                                                                                                                                                                                                                                                                                                                                                                                                          |  |
| <p>Histone deacetylase, HDAC7 RKTVPs<sup>178</sup>EP, RTRpS<sup>344</sup>EP, RAQpS<sup>479</sup>S</p>                                                                                                                                                                                                                                                                                                                                                                                                                                                                                                                                                                                                                                                                                                                                                                                                                                                                                                                                                                                                                                                                                                                                                                                                                                                                                                                                                                                                                                                                                                                                                                                                                                                                                                                                                                                                                                                                                                                                                                                                                                                                                                                                                                                                                                                                                                                                                                                                                                                                                                                                                                                                                                                                                                                                                   |  |
| <p>14-3-3 binding sites on HDAC4 Ser246, Ser467 and Ser632 (Paroni et al 2007)</p>                                                                                                                                                                                                                                                                                                                                                                                                                                                                                                                                                                                                                                                                                                                                                                                                                                                                                                                                                                                                                                                                                                                                                                                                                                                                                                                                                                                                                                                                                                                                                                                                                                                                                                                                                                                                                                                                                                                                                                                                                                                                                                                                                                                                                                                                                                                                                                                                                                                                                                                                                                                                                                                                                                                                                                      |  |
| <p>“The binding of HDAC7 to 14-3-3 appeared to be dependent on the serine residues Ser-178, Ser-344, and Ser-479, since the replacement of these residues by alanine reduced 14-3-3 binding by HDAC7. Interestingly, all three 14-3-3-binding sites within each HDAC are not equivalent. Ser-178 in the 14-3-3-binding site, RKT(A/V)pSEP, was the most critical for 14-3-3 binding in both HDAC4 and HDAC7 (47). Indeed, the inactivation of this site had a stronger effect than that of the two others (Fig. 5, C and D). Sequence comparison revealed that among the three sites, the NH<sub>2</sub>-terminal one presented the best homology to the consensus binding motif. Nevertheless, other sites also contributed to the binding of 14-3-3 by HDAC7 since the binding of HDAC7 by 14-3-3 was completely abolished only when all three motifs were inactivated. Similar results have also been observed for HDAC4 (47). Taken together, these results suggest that these three serines are the primary regulatory sites for nuclear export of class II HDACs. It is also interesting to note that class II HDACs are the only molecules identified so far that contain more than two 14-3-3-binding sites.” Kao et al 2001</p>                                                                                                                                                                                                                                                                                                                                                                                                                                                                                                                                                                                                                                                                                                                                                                                                                                                                                                                                                                                                                                                                                                                                                                                                                                                                                                                                                                                                                                                                                                                                                                                                                |  |
| <p><b>References to 14-3-3-binding to HDAC4, HDAC5, HDAC7 and HDAC9</b></p>                                                                                                                                                                                                                                                                                                                                                                                                                                                                                                                                                                                                                                                                                                                                                                                                                                                                                                                                                                                                                                                                                                                                                                                                                                                                                                                                                                                                                                                                                                                                                                                                                                                                                                                                                                                                                                                                                                                                                                                                                                                                                                                                                                                                                                                                                                                                                                                                                                                                                                                                                                                                                                                                                                                                                                             |  |
| <p>Backs J, Song K, Bezprozvannaya S, Chang S, Olson EN. CaM kinase II selectively signals to histone deacetylase 4 during cardiomyocyte hypertrophy. <i>J Clin Invest.</i> 2006 Jul;116(7):1853-64.</p>                                                                                                                                                                                                                                                                                                                                                                                                                                                                                                                                                                                                                                                                                                                                                                                                                                                                                                                                                                                                                                                                                                                                                                                                                                                                                                                                                                                                                                                                                                                                                                                                                                                                                                                                                                                                                                                                                                                                                                                                                                                                                                                                                                                                                                                                                                                                                                                                                                                                                                                                                                                                                                                |  |
| <p>Chang S, Bezprozvannaya S, Li S, Olson EN. An expression screen reveals modulators of class II histone deacetylase phosphorylation. <i>Proc Natl Acad Sci U S A.</i> 2005 Jun 7;102(23):8120-5.</p>                                                                                                                                                                                                                                                                                                                                                                                                                                                                                                                                                                                                                                                                                                                                                                                                                                                                                                                                                                                                                                                                                                                                                                                                                                                                                                                                                                                                                                                                                                                                                                                                                                                                                                                                                                                                                                                                                                                                                                                                                                                                                                                                                                                                                                                                                                                                                                                                                                                                                                                                                                                                                                                  |  |
| <p>Choi SJ, Park SY, Han TH. 14-3-3tau associates with and activates the MEF2D transcription factor during muscle cell differentiation. <i>Nucleic Acids Res.</i> 2001 Jul 1;29(13):2836-42.</p>                                                                                                                                                                                                                                                                                                                                                                                                                                                                                                                                                                                                                                                                                                                                                                                                                                                                                                                                                                                                                                                                                                                                                                                                                                                                                                                                                                                                                                                                                                                                                                                                                                                                                                                                                                                                                                                                                                                                                                                                                                                                                                                                                                                                                                                                                                                                                                                                                                                                                                                                                                                                                                                        |  |
| <p>Deng X, Ewton DZ, Mercer SE, Friedman E. Mirk/dyrk1B decreases the nuclear accumulation of class II histone deacetylases during skeletal muscle differentiation. <i>J Biol Chem.</i> 2005 Feb 11;280(6):4894-905.</p>                                                                                                                                                                                                                                                                                                                                                                                                                                                                                                                                                                                                                                                                                                                                                                                                                                                                                                                                                                                                                                                                                                                                                                                                                                                                                                                                                                                                                                                                                                                                                                                                                                                                                                                                                                                                                                                                                                                                                                                                                                                                                                                                                                                                                                                                                                                                                                                                                                                                                                                                                                                                                                |  |
| <p>Dequiedt F, Martin M, Von Blume J, Vertommen D, Lecomte E, Mari N, Heinen MF, Bachmann M, Twizere JC, Huang MC, Rider MH, Piwnicka-Worms H, Seufferlein T, Kettmann R. New role for hPar-1 kinases EMK and C-TAK1 in regulating localization and activity of class IIa histone deacetylases. <i>Mol Cell Biol.</i> 2006 Oct;26(19):7086-102.</p>                                                                                                                                                                                                                                                                                                                                                                                                                                                                                                                                                                                                                                                                                                                                                                                                                                                                                                                                                                                                                                                                                                                                                                                                                                                                                                                                                                                                                                                                                                                                                                                                                                                                                                                                                                                                                                                                                                                                                                                                                                                                                                                                                                                                                                                                                                                                                                                                                                                                                                     |  |
| <p>Ellis JJ, Valencia TG, Zeng H, Roberts LD, Deaton RA, Grant SR. CaM kinase II delta C phosphorylation of 14-3-3beta in vascular smooth muscle cells: activation of class II HDAC repression. <i>Mol Cell Biochem.</i> 2003 Jan;242(1-2):153-61.</p>                                                                                                                                                                                                                                                                                                                                                                                                                                                                                                                                                                                                                                                                                                                                                                                                                                                                                                                                                                                                                                                                                                                                                                                                                                                                                                                                                                                                                                                                                                                                                                                                                                                                                                                                                                                                                                                                                                                                                                                                                                                                                                                                                                                                                                                                                                                                                                                                                                                                                                                                                                                                  |  |

|                                                                                                                                                                                                                                                                                                                                                                                                                                                                                                                                                                                                                                                                                                                                                                                                                                                                                                                                                                                                                                                                                                                                                                                                                                                                                                                                                                                                                                                                                                                                                                                                                                                                                                                                                                                                                                                                                                                                                                                                                                                                                                                                                                                                                                                                                                                                                                                                                                                                                                                                                                                                                                                                                                                                                                                                                                                                                                                                                                                                                                                                                                                                                                                                                                                                                                                                                                                                                                                                                                                                                                                                                                                                                                                                                                                                                                                                                                                                                                                                                                                                                                                                                                                                                                                                                                               |  |
|---------------------------------------------------------------------------------------------------------------------------------------------------------------------------------------------------------------------------------------------------------------------------------------------------------------------------------------------------------------------------------------------------------------------------------------------------------------------------------------------------------------------------------------------------------------------------------------------------------------------------------------------------------------------------------------------------------------------------------------------------------------------------------------------------------------------------------------------------------------------------------------------------------------------------------------------------------------------------------------------------------------------------------------------------------------------------------------------------------------------------------------------------------------------------------------------------------------------------------------------------------------------------------------------------------------------------------------------------------------------------------------------------------------------------------------------------------------------------------------------------------------------------------------------------------------------------------------------------------------------------------------------------------------------------------------------------------------------------------------------------------------------------------------------------------------------------------------------------------------------------------------------------------------------------------------------------------------------------------------------------------------------------------------------------------------------------------------------------------------------------------------------------------------------------------------------------------------------------------------------------------------------------------------------------------------------------------------------------------------------------------------------------------------------------------------------------------------------------------------------------------------------------------------------------------------------------------------------------------------------------------------------------------------------------------------------------------------------------------------------------------------------------------------------------------------------------------------------------------------------------------------------------------------------------------------------------------------------------------------------------------------------------------------------------------------------------------------------------------------------------------------------------------------------------------------------------------------------------------------------------------------------------------------------------------------------------------------------------------------------------------------------------------------------------------------------------------------------------------------------------------------------------------------------------------------------------------------------------------------------------------------------------------------------------------------------------------------------------------------------------------------------------------------------------------------------------------------------------------------------------------------------------------------------------------------------------------------------------------------------------------------------------------------------------------------------------------------------------------------------------------------------------------------------------------------------------------------------------------------------------------------------------------------------------------------|--|
| <p>Fischle W, Kiermer V, Dequiedt F, Verdin E. The emerging role of class II histone deacetylases. <i>Biochem Cell Biol.</i> 2001;79(3):337-48.</p> <p>Gao C, Li X, Lam M, Liu Y, Chakraborty S, Kao HY. CRM1 mediates nuclear export of HDAC7 independently of HDAC7 phosphorylation and association with 14-3-3s. <i>FEBS Lett.</i> 2006 Sep 18;580(21):5096-104.</p> <p>Grozinger CM, Schreiber SL. Regulation of histone deacetylase 4 and 5 and transcriptional activity by 14-3-3-dependent cellular localization. <i>Proc Natl Acad Sci U S A.</i> 2000 Jul 5;97(14):7835-40.</p> <p>Kao HY, Verdel A, Tsai CC, Simon C, Juguilon H, Khochbin S. Mechanism for nucleocytoplasmic shuttling of histone deacetylase 7. <i>J Biol Chem.</i> 2001 Dec 14;276(50):47496-507.</p> <p>Li X, Song S, Liu Y, Ko SH, Kao HY. Phosphorylation of the histone deacetylase 7 modulates its stability and association with 14-3-3 proteins. <i>J Biol Chem.</i> 2004 Aug 13;279(33):34201-8.</p> <p>Martin M, Potente M, Janssens V, Vertommen D, Twizere JC, Rider MH, Goris J, Dimmeler S, Kettmann R, Dequiedt F. Protein phosphatase 2A controls the activity of histone deacetylase 7 during T cell apoptosis and angiogenesis. <i>Proc Natl Acad Sci U S A.</i> 2008 Mar 25;105(12):4727-32.</p> <p>McGee SL, van Denderen BJ, Howlett KF, Mollica J, Schertzer JD, Kemp BE, Hargreaves M. AMP-activated protein kinase regulates GLUT4 transcription by phosphorylating histone deacetylase 5. <i>Diabetes.</i> 2008 Apr;57(4):860-7.</p> <p>McKinsey TA, Zhang CL, Olson EN. Activation of the myocyte enhancer factor-2 transcription factor by calcium/calmodulin-dependent protein kinase-stimulated binding of 14-3-3 to histone deacetylase 5. <i>Proc Natl Acad Sci U S A.</i> 2000 Dec 19;97(26):14400-5.</p> <p>McKinsey TA, Zhang CL, Olson EN. Identification of a signal-responsive nuclear export sequence in class II histone deacetylases. <i>Mol Cell Biol.</i> 2001 Sep;21(18):6312-21.</p> <p>Miska EA, Langley E, Wolf D, Karlsson C, Pines J, Kouzarides T. Differential localization of HDAC4 orchestrates muscle differentiation. <i>Nucleic Acids Res.</i> 2001 Aug 15;29(16):3439-47.</p> <p>Nishino TG, Miyazaki M, Hoshino H, Miwa Y, Horinouchi S, Yoshida M. 14-3-3 regulates the nuclear import of class IIa histone deacetylases. <i>Biochem Biophys Res Commun.</i> 2008 Dec 19;377(3):852-6.</p> <p>Paroni G, Cernotta N, Dello Russo C, Gallinari P, Pallaoro M, Foti C, Talamo F, Orsatti L, Steinkühler C, Brancolini C. PP2A regulates HDAC4 nuclear import. <i>Mol Biol Cell.</i> 2008 Feb;19(2):655-67.</p> <p>Paroni G, Fontanini A, Cernotta N, Foti C, Gupta MP, Yang XJ, Fasino D, Brancolini C. Dephosphorylation and caspase processing generate distinct nuclear pools of histone deacetylase 4. <i>Mol Cell Biol.</i> 2007 Oct;27(19):6718-32.</p> <p>Wang AH, Grégoire S, Zika E, Xiao L, Li CS, Li H, Wright KL, Ting JP, Yang XJ. Identification of the ankyrin repeat proteins ANKRA and RFXANK as novel partners of class IIa histone deacetylases. <i>J Biol Chem.</i> 2005 Aug 12;280(32):29117-27.</p> <p>Wang AH, Kruhlak MJ, Wu J, Bertos NR, Vezmar M, Posner BI, Bazett-Jones DP, Yang XJ. Regulation of histone deacetylase 4 by binding of 14-3-3 proteins. <i>Mol Cell Biol.</i> 2000 Sep;20(18):6904-12.</p> <p>Wang AH, Yang XJ. Histone deacetylase 4 possesses intrinsic nuclear import and export signals. <i>Mol Cell Biol.</i> 2001 Sep;21(17):5992-6005.</p> <p>Zhang CL, McKinsey TA, Olson EN. The transcriptional corepressor MITR is a signal-responsive inhibitor of myogenesis. <i>Proc Natl Acad Sci U S A.</i> 2001 Jun 19;98(13):7354-9. (<b>HDAC9</b>)</p> <p>Zhang T, Kohlhaas M, Backs J, Mishra S, Phillips W, Dybkova N, Chang S, Ling H, Bers DM, Maier LS, Olson EN, Brown JH. CaMKII<math>\delta</math> isoforms differentially affect calcium handling but similarly regulate HDAC/MEF2 transcriptional responses. <i>J Biol Chem.</i> 2007 Nov 30;282(48):35078-87.</p> <p>Zhao X, Ito A, Kane CD, Liao TS, Bolger TA, Lemrow SM, Means AR, Yao TP. The modular nature of histone deacetylase HDAC4 confers phosphorylation-dependent intracellular trafficking. <i>J Biol Chem.</i> 2001 Sep 14;276(37):35042-8.</p> |  |
| <p><b>Human HIST1H3A</b> Histone H3 (Swissprot = P68431)</p> <p>1 MARTKQTARK STGGKAPRKQ LATKAARKSA PATGGVKKPH RYRPGTVALR EIRRYQKSTE<br/>61 LLIRKLPFQR LVREIAQDFK TDLRFQSSAV MALQEACEAY LVGLFEDTNL CAIHAKRVTI<br/>121 MPKDIQLARR IRGERA</p> <p>&gt;gi 55977055 sp P68431.2 H31 HUMAN RecName: Full=Histone H3.1; AltName: Full=H3/a; AltName: Full=H3/b; AltName: Full=H3/c; AltName: Full=H3/d; AltName: Full=H3/f; AltName: Full=H3/h; AltName: Full=H3/i; AltName: Full=H3/j; AltName: Full=H3/k; AltName: Full=H3/l<br/>MARTKQTARKSTGGKAPRKQLATKAARKSAPATGGVKKPHRYRPGTVALREIRRYQKSTELLIRKLPFQR<br/>LVREIAQDFKTDLRFQSSAVMALQEACEAYLVGLFEDTNLCAIHAKRVTIMPKDIQLARRIRGERA</p> <p><b>Notes</b></p> <p>H3 Histone H3, along with histone H4, plays a central role in nucleosome formation. Because it is often impossible to distinguish among histone paralogues using the short sequences surrounding post-translational modifications, we have chosen to bundle the proteins of the H3 histone class into a single entry. These do not represent splicing isoforms or polymorphisms but, rather, the products of different genes. Histone H3 sequence is <math>\gamma</math>-ARKpSTGGK<math>_{14}</math> and ARK<math>_{AcS_p}</math>TGGK<math>_{Ac}</math>, residues 7–14.</p> <p>"In vitro, the affinity of 14-3-3 for phosphoserine 10 is weak but becomes significantly increased by additional acetylation of either lysine 9 or lysine 14 on the same histone tail. In contrast, the histone H3S28 site matches elements of 14-3-3 high affinity consensus motifs. Winter et al (2008)"</p> <p><b>References to 14-3-3 binding to Histone H3</b></p> <p>Macdonald N, Welburn JP, Noble ME, Nguyen A, Yaffe MB, Clynes D, Moggs JG, Orphanides G, Thomson S, Edmunds JW, Clayton AL, Endicott JA, Mahadevan LC. Molecular basis for the recognition of phosphorylated and phosphoacetylated histone h3 by 14-3-3. <i>Mol Cell.</i> 2005 Oct 28;20(2):199-211.</p> <p>Winter S, Fischle W, Seiser C. Modulation of 14-3-3 interaction with phosphorylated histone H3 by combinatorial modification patterns. <i>Cell Cycle.</i> 2008 May 15;7(10):1336-42.</p> <p>Zippo A, Serafini R, Rocchigiani M, Pennacchini S, Krepelova A, Oliviero S. Histone Crosstalk between H3S10ph and H4K16ac Generates a Histone Code that Mediates Transcription Elongation. <i>Cell.</i> 2009 Sep 18;138(6):1122-36.</p>                                                                                                                                                                                                                                                                                                                                                                                                                                                                                                                                                                                                                                                                                                                                                                                                                                                                                                                                                                                                                                                                                                                                                                                                                                                                                                                                                                                                                                                                                                                                                                                                                                                                                                                                                                                                                                                                                                 |  |
| <p><b>Human HJURP</b> Holliday junction recognition protein (Swissprot = Q8NCD3)</p> <p>1 MLGTLRAMEG EDVEDDQLLQ KLRASRRRFQ RRMQRLLIEKY NQPFEDTPVV QMATLTLETPT<br/>61 QGLRIWGGRL IKERNKGEIQ DSSMKPADRT DGSVQAAAWG PELPSHRTVL GADSKSGEVD</p>                                                                                                                                                                                                                                                                                                                                                                                                                                                                                                                                                                                                                                                                                                                                                                                                                                                                                                                                                                                                                                                                                                                                                                                                                                                                                                                                                                                                                                                                                                                                                                                                                                                                                                                                                                                                                                                                                                                                                                                                                                                                                                                                                                                                                                                                                                                                                                                                                                                                                                                                                                                                                                                                                                                                                                                                                                                                                                                                                                                                                                                                                                                                                                                                                                                                                                                                                                                                                                                                                                                                                                                                                                                                                                                                                                                                                                                                                                                                                                                                                                                                    |  |

|                                                                                                                                                                                                                                                                                                                                                                                                                                                                                                                                                                                                                                                                                                                                                                                                                                                                                                                                                                                                                                                                                                                                                                                                                                                                                                                                                                                                                                                                                                                                                                                                                                                                                                                                                                                                                                                                                                                                                                                                                                                                                                                                                                                                                                                                                                                                                                                                                                                                                                                                                                                                                                                                                                                                                                                                                                                                                                                                                                                                                                                                                                                                                                                                                                                                                                                                                                                                                                                                                       |                                                                                            |
|---------------------------------------------------------------------------------------------------------------------------------------------------------------------------------------------------------------------------------------------------------------------------------------------------------------------------------------------------------------------------------------------------------------------------------------------------------------------------------------------------------------------------------------------------------------------------------------------------------------------------------------------------------------------------------------------------------------------------------------------------------------------------------------------------------------------------------------------------------------------------------------------------------------------------------------------------------------------------------------------------------------------------------------------------------------------------------------------------------------------------------------------------------------------------------------------------------------------------------------------------------------------------------------------------------------------------------------------------------------------------------------------------------------------------------------------------------------------------------------------------------------------------------------------------------------------------------------------------------------------------------------------------------------------------------------------------------------------------------------------------------------------------------------------------------------------------------------------------------------------------------------------------------------------------------------------------------------------------------------------------------------------------------------------------------------------------------------------------------------------------------------------------------------------------------------------------------------------------------------------------------------------------------------------------------------------------------------------------------------------------------------------------------------------------------------------------------------------------------------------------------------------------------------------------------------------------------------------------------------------------------------------------------------------------------------------------------------------------------------------------------------------------------------------------------------------------------------------------------------------------------------------------------------------------------------------------------------------------------------------------------------------------------------------------------------------------------------------------------------------------------------------------------------------------------------------------------------------------------------------------------------------------------------------------------------------------------------------------------------------------------------------------------------------------------------------------------------------------------------|--------------------------------------------------------------------------------------------|
| <p>121 ATSDQEEVSA WALAPAVPQS PLKNELRKY LTQVDILLQG AEYFECAGNR AGRDVRVTPL<br/> 181 PSLASPAVPA PGYCSRISGK SPGDPAPKAS SPREWDPLHP SSTDMALVPR NDSLSLQETS<br/> 241 SSSFLSSQPF EDDICNVTI SDLYAGMLHS MSRLSTKPS SIISTKTFIM QNWNCRRRHR<br/> 301 YKSRMNTKY KGARSRQSS KENFI PCSEP VKGTGALRDC KNVLDVSCRK TGLKLEKAF<br/> 361 EVNRPQIHLK DPSWKERKVT PSKYSSLIYF DSSATYNLDE ENRFRTLKWL ISPVKIVSRP<br/> 421 TIRQGHGENR QREIEIRFDQ LHREYCLSPR NQPRRMCLPD SWAMNMYRGG PASPGGLQGL<br/> 481 ETRRLSLPSS KAKAKSLSEA FENLGKRSLE AGRCLPKSDS SSSLPKTNPT HSATRPQQT<br/> 541 DLHVQGNSSG IFRKSVSPSK TLSVPDKEVP GHGRNRYDEI KEEFDKHLQK YCLKSPGQMT<br/> 601 VPLCIGVSTK KASMEVRYQT EGFGLKLNPD PHFQGFQKLP SSPLGCRKSL LGSTAIEAPS<br/> 661 STCVARAITR DGTRDHQFPA KRPRLSEPOG SGRQGNLGA SDGVDNTRVP GDQSSSQPN<br/> 721 SEERGENTS YRMEEKSDFML EKLETKSV</p> <p>&gt;gi 239938642 sp Q8NCD3.2 HJURP_HUMAN RecName: Full=Holliday junction recognition protein; AltName: Full=14-3-3-associated AKT substrate; AltName: Full=Fetal liver-expressing gene 1 protein; AltName: Full=Up-regulated in lung cancer 9</p> <p>MLGTLRAMEGEDVEDDQLLQKLRASRRRFQRRMQRLIEKYNQPFEDTPVVMATLTYETPQGLRIWGGRL<br/> IKERNEGEIQDSSMKPADRTDGSVQAAAWGPPELPSHRTVLGADSKSGEVDATSDQEEVSAWALAPAVPQS<br/> PLKNELRKYLTQVDILLQGAEYFECAGNRAGRDRVVTPLPSLASPAVPA PGYCSRI SRKSPGDPAPKAS<br/> SPREWDPLHPSSTDMALVPRNDSLQETS SSSFLSSQPFEDDICI CNVTI SDLYAGMLHSMSRLSTKPS<br/> SIISTKTFIMQNWNCRRRHRKYKSRMNTKYCKGARSRQSSKENFI PCSEPVKGTGALRDCKNVLDVSCRK<br/> TGLKLEKAFLEVNRPQIHLKDPSWKERKVT PSKYSSLIYFDSSATYNLDEENRFRTLKWL ISPVKIVSRP<br/> TIRQGHGENRQREIEIRFDQLHREYCLSPRNQPRRMCLPD SWAMNMYRGG PASPGGLQGLETRRLSLPSS<br/> KAKAKSLSEAFENLGKRSLEAGRCLPKSDSSSSLPKTNPTHSATRPQQTDLHVQGNSSG IFRKSVSPSK<br/> TLSVPDKEVP GHGRNRYDEI KEEFDKHLQK YCLKSPGQMTVPLCIGVSTDKASMEVRYQTEGFGLKLNPD<br/> PHFQGFQKLPSSPLGCRKSL LGSTAIEAPSSSTCVARAITR DGTRDHQFPAKRPRLSEPOGSGRQGNLGA<br/> SDGVDNTRVPGDQSSSQPNSEERGENTS YRMEEKSDFML EKLETKSV</p> <p><b>Notes</b><br/> "Centromeric protein that plays a central role in the incorporation and maintenance of histone H3-like variant CENPA at centromeres. Acts as a specific chaperone for CENPA and is required for the incorporation of newly synthesized CENPA molecules into nucleosomes at replicated centromeres. Directly binds Holliday junctions" Interacts with 14-3-3 family members in a phosphorylation-dependent manner. Interacts with MSH5 and NBN. Directly binds Holliday junctions.<br/> 14-3-3/FAKTS interaction was markedly enhanced by the expression of activated Akt/PKB, suggesting a phosphorylation dependent event. Ser479 as the predominant residue that mediates the association (RRLS479LP). (Ser473= Ser486 in Q8NCD3) (N.B. This is not a conventional Akt/PKB site).</p> <p><b>References to 14-3-3 binding to JURP (FAKTS)</b><br/> Luhn P, Wang H, Marcus AI, Fu H. Identification of FAKTS as a novel 14-3-3-associated nuclear protein. <i>Proteins</i>. 2007 May 1;67(2):479-89</p>                                                                                                                                                                                                                                                                                                                                                                                                                                                                                                                        |                                                                                            |
| <p><b>Human HSF1</b> Heat-shock transcription factor (Swissprot = Q00613)</p> <p>1 MDLPVGPAA GPNVPAFLT KLWTLVSDPD TDALICWSPS GNSFHVFDQG QFAKEVLPKY<br/> 61 FKHNMMASV RQLNMYGFRK VVHIEQGGV KPERDDTEFQ HPCFLRGQEQ LLENIKRKVT<br/> 121 SVSTLKSEDI KIRQDSVTKL LTDVQLMKGK QECMDSKLLA MKHENEALWR EVASLRQKHA<br/> 181 QQQKVVNKLI QFLISLVQSN RILGVKRRIP LMLNDSGSAH SMPKYSRQFS LEHVHSGPY<br/> 241 SAPSPAYSSS SLYAPDAVAS SGLIISDITE LAPASPMAS GGSIDERPLS SSPLVRVKEE<br/> 301 PPSPPQS PRV EEASPGRPSS VDTLLSPTAL IDSILRESEP APASVTALTD ARGHTDTEGR<br/> 361 PPSPPPTSTP EKCLSVACL DKNELSDHLA MDSNLDNLQT MLSSHGFVSD TSALLDLFSP<br/> 421 SVTVPMDSLP DLDSLASIQ ELLSPQEP RPPEAENSSPD SGKQLVHYTA QPLFLLDPGS<br/> 481 VDTGSNDLPV LFEELGEGSYF SEGDFAEDEP TISLLTGSEP PKAKDPTVS</p> <p>&gt;gi 462333 sp Q00613.1 HSF1_HUMAN RecName: Full=Heat shock transcription factor 1; Short=HSF 1; AltName: Full=Heat shock transcription factor 1; Short=HSTF 1</p> <p>MDLVGPAA GPNVPAFLT KLWTLVSDPD TDALICWSPS GNSFHVFDQG QFAKEVLPKY FKHNMMASV<br/> RQLNMYGFRK VVHIEQGGV KPERDDTEFQ HPCFLRGQEQ LLENIKRKVT SVSTLKSEDI KIRQDSVTKL<br/> LTDVQLMKGK QECMDSKLLAMKHENEALWR EVASLRQKHA QQQKVVNKLI QFLISLVQSN RILGVKRRIP<br/> LMLNDSGSAH SMPKYSRQFS LEHVHSGPY SAPSPAYSSS SLYAPDAVAS SGLIISDITE LAPASPMAS<br/> GGSIDERPLS SSPLVRVKEE PPSPPQS PRV EEASPGRPSS VDTLLSPTAL IDSILRESEP APASVTALTD<br/> ARGHTDTEGR PPSPPPTSTP EKCLSVACL DKNELSDHLA MDSNLDNLQT MLSSHGFVSD TSALLDLFSP<br/> SVTVPMDSLP DLDSLASIQ ELLSPQEP RPPEAENSSPD SGKQLVHYTA QPLFLLDPGS VDTGSNDLPV<br/> LFEELGEGSYF SEGDFAEDEP TISLLTGSEP PKAKDPTVS</p> <p><b>Notes</b><br/> HSF1 a heat-shock transcription factor. Transcription of heat-shock genes is rapidly induced after temperature stress. Hsp90, by itself and/or associated with multichaperone complexes, is a major repressor of HSF1. Two alternatively spliced isoforms have been described.<br/> ERK activation results in the recruitment of the phosphoserine binding protein 14-3-3epsilon in a manner dependent on previous HSF1 phosphorylation by ERK. The effects of 14-3-3epsilon binding on HSF1 were complex, however, depending on extracellular conditions, in that HSF1-14-3-3 binding at 37 degrees C led to the cytoplasmic sequestration and repression of HSF1, whereas heat shock overrode these effects and caused quantitative nuclear localization of HSF1. Although the effects of 14-3-3epsilon binding to HSF1 were overridden acutely by stress, during recovery from heat shock, 14-3-3epsilon association again led to enhanced cytoplasmic localization of HSF1, implicating a role for ERK/14-3-3epsilon in HSF1 deactivation in recovering cells. Association of HSF1 with ERK and 14-3-3epsilon during heat shock may thus modulate the amplitude of the response and lead to efficient termination of HSP expression on resumption of growth conditions.<br/> Wild-type HSF1 binds to 14-3-3{epsilon}-GST with markedly greater avidity than the double Ser303Ala/Ser307Ala mutant. However, the HSF1 mutant was observed to bind in repeated experiments, albeit at ~20% of the efficiency of wtHSF1. Our experiments indicate that serines 303 and 307 are required for efficient HSF1 binding to 14-3-3{epsilon}. They also suggest the possibility that 14-3-3{epsilon} can bind with reduced efficiency to the unphosphorylated Ser-303/307 region or to another as-yet uncharacterized site in HSF1.</p> <p><b>References to 14-3-3 binding to HSF1</b></p> | <p><b>SITES NOT DEFINED<br/> PRECISELY, NOT<br/> INCLUDED IN<br/> WEBLOGO ANALYSIS</b></p> |

|                                                                                                                                                                                                                                                                                                                                                                                                                                                                                                                                                                                                                                                                                                                                                                                                                                                                                                                                                                                                                                                                                                                                                                                                                                                                                                                                                                                                                                                                                                                                                                                                                                                                                                                                                                                                                                                                                                                                                                                                                                                                                                                                                                                                                                                                                                                                                                                                                                                                                                                                                                                                                                                                                                                                                                                                                                                                                                                                                                                                                                                                                                                                                                                                                                                                                                                                                                                                                                                                                                                                                                                                                                             |  |
|---------------------------------------------------------------------------------------------------------------------------------------------------------------------------------------------------------------------------------------------------------------------------------------------------------------------------------------------------------------------------------------------------------------------------------------------------------------------------------------------------------------------------------------------------------------------------------------------------------------------------------------------------------------------------------------------------------------------------------------------------------------------------------------------------------------------------------------------------------------------------------------------------------------------------------------------------------------------------------------------------------------------------------------------------------------------------------------------------------------------------------------------------------------------------------------------------------------------------------------------------------------------------------------------------------------------------------------------------------------------------------------------------------------------------------------------------------------------------------------------------------------------------------------------------------------------------------------------------------------------------------------------------------------------------------------------------------------------------------------------------------------------------------------------------------------------------------------------------------------------------------------------------------------------------------------------------------------------------------------------------------------------------------------------------------------------------------------------------------------------------------------------------------------------------------------------------------------------------------------------------------------------------------------------------------------------------------------------------------------------------------------------------------------------------------------------------------------------------------------------------------------------------------------------------------------------------------------------------------------------------------------------------------------------------------------------------------------------------------------------------------------------------------------------------------------------------------------------------------------------------------------------------------------------------------------------------------------------------------------------------------------------------------------------------------------------------------------------------------------------------------------------------------------------------------------------------------------------------------------------------------------------------------------------------------------------------------------------------------------------------------------------------------------------------------------------------------------------------------------------------------------------------------------------------------------------------------------------------------------------------------------------|--|
| <p>Wang X, Grammatikakis N, Siganou A, Stevenson MA, Calderwood SK. Interactions between extracellular signal-regulated protein kinase 1, 14-3-3epsilon, and heat shock factor 1 during stress. <i>J Biol Chem.</i> 2004 Nov 19;279(47):49460-9.</p> <p>Wang X, Grammatikakis N, Siganou A, Calderwood SK. Regulation of molecular chaperone gene transcription involves the serine phosphorylation, 14-3-3 epsilon binding, and cytoplasmic sequestration of heat shock factor 1. <i>Mol Cell Biol.</i> 2003 Sep;23(17):6013-26.</p> <p>Calderwood SK. Regulatory interfaces between the stress protein response and other gene expression programs in the cell. <i>Methods.</i> 2005 Feb;35(2):139-48.</p>                                                                                                                                                                                                                                                                                                                                                                                                                                                                                                                                                                                                                                                                                                                                                                                                                                                                                                                                                                                                                                                                                                                                                                                                                                                                                                                                                                                                                                                                                                                                                                                                                                                                                                                                                                                                                                                                                                                                                                                                                                                                                                                                                                                                                                                                                                                                                                                                                                                                                                                                                                                                                                                                                                                                                                                                                                                                                                                                |  |
| <p><b>Human HspB6</b> (HSP20) (Swissprot = O14558)</p> <pre> 1 MEIPVPVQPS WLRRA SAPLP GLSAPGRLFD QRFGEGLLEA ELAALCPTTL APYYLRAPSV 61 ALPVAQVPTD PGHFSVLLDV KHFSPEEIAV KVVGEHVEVH ARHEERPDEH GFVAREFHRR 121 YRLPPGVDDA AVTSALSPEG VLSIQAAPAS AQAPPPAAAK &gt;gi 22096351 sp O14558.2 HSPB6_HUMAN RecName: Full=Heat shock protein beta-6; Short=HspB6; AltName: Full=Heat shock 20 kDa-like protein p20 MEIPVPVQPSWLRRASAPLPGLSAPGRLFDQRFGEGLLEAELAALCPTTLAPYYLRAPSVALPVAQVPTD PGHFSVLLDVKHFSPEEIAVKVVGEHVEVHARHEERPDEHGFVAREFHRRYRLPPGVDDPAAVTSALSPEG VLSIQAAPASAQAPPPAAAK Notes WLRRA(pS16)APLPGL References to 14-3-3 binding to HSP20 Dreiza CM, Brophy CM, Komalavilas P, Furnish EJ, Joshi L, Pallero MA, Murphy-Ullrich JE, von Rechenberg M, Ho YS, Richardson B, Xu N, Zhen Y, Peltier JM, Panitch A. Transducible heat shock protein 20 (HSP20) phosphopeptide alters cytoskeletal dynamics. <i>FASEB J.</i> 2005 Feb;19(2):261-3. Chemik IS, Seit-Nebi AS, Marston SB, Gusev NB. Small heat shock protein Hsp20 (HspB6) as a partner of 14-3-3gamma. <i>Mol Cell Biochem.</i> 2007 Jan;295(1-2):9-17. Lopes LB, Furnish EJ, Komalavilas P, Flynn CR, Ashby P, Hansen A, Ly DP, Yang GP, Longaker MT, Panitch A, Brophy CM. Cell permeant peptide analogues of the small heat shock protein, HSP20, reduce TGF-beta1-induced CTGF expression in keloid fibroblasts. <i>J Invest Dermatol.</i> 2009 Mar;129(3):590-8. </pre>                                                                                                                                                                                                                                                                                                                                                                                                                                                                                                                                                                                                                                                                                                                                                                                                                                                                                                                                                                                                                                                                                                                                                                                                                                                                                                                                                                                                                                                                                                                                                                                                                                                                                                                                                                                                                                                                                                                                                                                                                                                                                                                                                                                                         |  |
| <p><b>Human IGF1R</b> Insulin-like growth factor I receptor (Swissprot = P08069)</p> <pre> 1 MKSGSGGGSP TSLWGLLFLS AALS LWP TSG EICGPGIDIR NDYQQLKRLE NCTVIEGYLH 61 ILLISKAEDY RSYRFPKLT V ITEYLLLFV AGLESLGDLF PNLTVIRGWK LFYNYALVIF 121 EMTNLKDIGL YNLRNITRGA IRIEKNADLC YLSTVDWSLI LDAVSNNYIV GNKPPKECGD 181 LCPGTMEEKP MCEKTTINNE YNYRCWTTNR CQKMCPS TCG KRAC TENNEC CHEPCLGSCS 241 APDNDTACVA CRHYYYAGVC VPACPPNTYR FEGWRCVDRD FCANILSAES DSEGFV IHD 301 GECMQECP SG FIRNGSQSMY CIPCEGPCPK VCEEEKTKT IDSVTSAQML QGCTIFKGNL 361 LINIRRGNNI ASELENFMGL IEVVTGYVKI RSHALVSL FLKNLRLILG EEQLEGNYSF 421 YVLDNQNLQL LWDWDHRNLT IKAGKMYFAF NPKLCVSEIY RMEEVTG TKG RQSKLGDINTR 481 NNGERASCES DVLHFTSTTT SKNRIITWH RYRPPDYRDL ISFTVYYKEA PFKNVTEYDG 541 QDAGSNSWN MVDVDLPPNK DVEPGILLHG LKPWTQYAVY VKAVTLTMVE NDHIRGAKSE 601 ILYIRTNASV PSIPLDVLSA SNSSQLIVK WNPPSLPNGN LSYYIVRWQR QPDGGLYLRH 661 NYCSKDKIPI RKYADGTIDI EEVTENPKTE VCGGEGKGPC ACPKTEAEKQ AEKEEAEYRK 721 VFENFLHNSI FVPRPERKRR DVMQVANTTM SSRSRNTTAA DTYNITDPEE LETEYPPFES 781 RVDNKERTVI SNLRFPTLYR IDIHSCNHEA EKLGC SASNF VFARTMPAEG ADDIPGPVTW 841 EPRPENSIFL KWPEPENPNG LILMYEIKYG SQVEDQREC VSRQYRKYGG AKLNRLNPGN 901 YTARIQATSL SGNGSWTDPV FFYVQAKTGY ENFIHLIAL PVAVLLIVGG LVIMLGVFHR 961 KRNSRLGNG VLYASVNPEY FSAADVVPD EWEVAREKIT MSRELGGQSF GMVYEGVAKG 1021 VVKDEPETRV AIKTVNEAAS MRERIEFLNE ASVMKEFNCH HVVRLLVVVS QGQPTLVIME 1081 LMTRGDLKSY LRSIRPEMEN NPVLAPPSLS KMIQAGEIA DGMAYLNANK FVHRDLAARN 1141 CMVAEDFTVK IGDFGMTRDI YETDYRKGK GLLPVRWMS PESLKDGVFT TYSDVWSFGV 1201 VLWEIATLAE QPYQGLSNEQ VLRFMVGGGL LDKPDNCPDM LFEMLRMCWQ YNPKMRPSFL 1261 EIISSIKEEM EPGFREVSFY YSEENKLEPE EELDLEPENM ESVPLDPSAS SSS LPLPDRH 1321 SGHKAENGP GVLVLRASF DERQPYAHMN GGRKNERALP LPQSSTC &gt;gi 124240 sp P08069.1 IGF1R_HUMAN RecName: Full=Insulin-like growth factor 1 receptor; AltName: Full=Insulin-like growth factor I receptor; Short=IGF-I receptor; AltName: CD_antigen=CD221; Contains: RecName: Full=Insulin-like growth factor 1 receptor alpha chain; Contains: RecName: Full=Insulin-like growth factor 1 receptor beta chain; Flags: Precursor MKSGSGGGSP TSLWGLLFLS AALS LWP TSG EICGPGIDIR NDYQQLKRLE NCTVIEGYLH ILLISKAEDY RSYRFPKLT V ITEYLLLFV AGLESLGDLF PNLTVIRGWK LFYNYALVIF EMTNLKDIGL YNLRNITRGA IRIEKNADLC YLSTVDWSLI LDAVSNNYIV GNKPPKECGD LCPGTMEEKP MCEKTTINNE YNYRCWTTNR CQKMCPS TCG KRAC TENNEC CHEPCLGSCS APDNDTACVA CRHYYYAGVC VPACPPNTYR FEGWRCVDRD FCANILSAES DSEGFV IHD GECMQECP SG FIRNGSQSMY CIPCEGPCPK VCEEEKTKT IDSVTSAQML QGCTIFKGNL LINIRRGNNI ASELENFMGL IEVVTGYVKI RSHALVSL FLKNLRLILG EEQLEGNYSF YVLDNQNLQL LWDWDHRNLT IKAGKMYFAF NPKLCVSEIY RMEEVTG TKG RQSKLGDINTR NNGERASCES DVLHFTSTTT SKNRIITWH RYRPPDYRDL ISFTVYYKEA PFKNVTEYDG QDAGSNSWN MVDVDLPPNK DVEPGILLHGLK PWTQYAVY VKAVTLTMVENDHIRGAKSE ILYIRTNASV PSIPLDVLSA SNSSQLIVK WNPPSLPNGN LSYYIVRWQR QPDGGLYLRH NYCSKDKIPI RKYADGTIDI EEVTENPKTE VCGGEGKGPC ACPKTEAEKQAEKEEAEYRKFENFLHNSI FVPRPERKRR DVMQVANTTM SSRSRNTTAA DTYNITDPEE LETEYPPFES RVDNKERTVI SNLRFPTLYR IDIHSCNHEA EKLGC SASNF VFARTMPAEG ADDIPGPVTW EPRPENSIFL KWPEPENPNG LILMYEIKYG SQVEDQREC VSRQYRKYGG AKLNRLNPGNYTARIQATSL SGNGSWTDPV FFYVQAKTGY ENFIHLIAL PVAVLLIVGG LVIMLGVFHR KRNSRLGNG VLYASVNPEY FSAADVVPD EWEVAREKIT MSRELGGQSGFMVYEGVAKGVV KDEPETRVAIKTVNEAAS MRERIEFLNE ASVMKEFNCH HVVRLLVVVS QGQPTLVIME LMTRGDLKSY LRSIRPEMEN NPVLAPPSLS KMIQAGEIA DGMAYLNANK FVHRDLAARN CMVAEDFTVK IGDFGMTRDI YETDYRKGK GLLPVRWMS PESLKDGVFT TYSDVWSFGV VLWEIATLAE QPYQGLSNEQ VLRFMVGGGL LDKPDNCPDM LFEMLRMCWQ YNPKMRPSFL EIISSIKEEM EPGFREVSFY YSEENKLEPE EELDLEPENMESVPLDPSAS SSS LPLPDRH SGHKAENGP </pre> |  |



|                                                                                                                                                                                                                                                                                                                                                                                                                                                                                                                                                                                                                                                                                                                                                                                                                                                                                                                                                                                                                                                                                                                                                                                                                                                                                                                                                                                                                                                                                                                                                                                                                                                                                                                                                                                                                                                                                                                                                                                                                                                                                                                                                                                                                                                                                                                                                                                                                                                                                                                                                                                                                                                                                                        |                                                                                                       |
|--------------------------------------------------------------------------------------------------------------------------------------------------------------------------------------------------------------------------------------------------------------------------------------------------------------------------------------------------------------------------------------------------------------------------------------------------------------------------------------------------------------------------------------------------------------------------------------------------------------------------------------------------------------------------------------------------------------------------------------------------------------------------------------------------------------------------------------------------------------------------------------------------------------------------------------------------------------------------------------------------------------------------------------------------------------------------------------------------------------------------------------------------------------------------------------------------------------------------------------------------------------------------------------------------------------------------------------------------------------------------------------------------------------------------------------------------------------------------------------------------------------------------------------------------------------------------------------------------------------------------------------------------------------------------------------------------------------------------------------------------------------------------------------------------------------------------------------------------------------------------------------------------------------------------------------------------------------------------------------------------------------------------------------------------------------------------------------------------------------------------------------------------------------------------------------------------------------------------------------------------------------------------------------------------------------------------------------------------------------------------------------------------------------------------------------------------------------------------------------------------------------------------------------------------------------------------------------------------------------------------------------------------------------------------------------------------------|-------------------------------------------------------------------------------------------------------|
| <p>PGVLVLRASFDERQPYAHMNGGRKNERALPLPQSSTC</p> <p><b>Notes</b><br/>Spence et al (2003) report PMA-stimulated phosphorylation and 14-3-3 binding to VPLDPSASSpS<sup>1283</sup>LP (=Ser1313 in P08069)</p> <p><b>References to 14-3-3 binding to IGF1 receptor</b><br/>Craparo A, Freund R, Gustafson TA. 14-3-3 (epsilon) interacts with the insulin-like growth factor I receptor and insulin receptor substrate I in a phosphoserine-dependent manner. J Biol Chem. 1997 Apr 25;272(17):11663-9.<br/>Spence SL, Dey BR, Terry C, Albert P, Nissley P, Furlanetto RW. Interaction of 14-3-3 proteins with the insulin-like growth factor I receptor (IGFIR): evidence for a role of 14-3-3 proteins in IGFIR signaling. Biochem Biophys Res Commun. 2003 Dec 26;312(4):1060-6.<br/>Furlanetto RW, Dey BR, Lopaczynski W, Nissley SP. 14-3-3 proteins interact with the insulin-like growth factor receptor but not the insulin receptor. Biochem J. 1997 Nov 1;327 ( Pt 3):765-71.</p>                                                                                                                                                                                                                                                                                                                                                                                                                                                                                                                                                                                                                                                                                                                                                                                                                                                                                                                                                                                                                                                                                                                                                                                                                                                                                                                                                                                                                                                                                                                                                                                                                                                                                                                   |                                                                                                       |
| <p><b>Human IL-9R</b> (<math>\alpha</math>-Chain of interleukin 9 receptor)</p> <p><b>Notes</b><br/>KARpS<sup>519</sup>WpT<sup>521</sup>F-COOH</p> <p><b>References to 14-3-3 binding to <math>\alpha</math>-chain of interleukin 9 receptor (IL-9R)</b><br/>Sliva D, Gu M, Zhu YX, Chen J, Tsai S, Du X, Yang YC. 14-3-3zeta interacts with the alpha-chain of human interleukin 9 receptor. Biochem J. 2000 Feb 1;345 Pt 3:741-7.</p>                                                                                                                                                                                                                                                                                                                                                                                                                                                                                                                                                                                                                                                                                                                                                                                                                                                                                                                                                                                                                                                                                                                                                                                                                                                                                                                                                                                                                                                                                                                                                                                                                                                                                                                                                                                                                                                                                                                                                                                                                                                                                                                                                                                                                                                                | <p>NOT CERTAIN WHETHER SER519 OR THR521 IS THE PHOPHORYLATED 14-3-3-BINDING SITE – NOT IN WEBLOGO</p> |
| <p><b>Human INGI (p33ING1b)</b> Inhibitor of growth protein 1 (Swissprot = Q9UK53)</p> <p>1 YSSSSDPGPV GRGRCSSDR LPRPAGPARR QFQAASLLTR GWGRAWPWKQ ILKELDECYE<br/>61 RFSRETDGAQ KRRMLHCVQR ALIRSQELGD EKIQIVSQMV ELVENRTRQV DSHVELFEAQ<br/>121 QELGDTAGNS GKAGADRPKG EAAQADKPN SKRSRRQRNN ENRENASSNH DHDDGASGTP<br/>181 KEKKAKTSKK KKRKAKAER EASPADLPID PNEPTYCLCN QVSYGEMIGC DNDECEIWF<br/>241 HFSCVGLNHK PKGKWCPCPC RGENEKTMDK ALEKSKKERA YNR</p> <p>&gt;gi 212276438 sp Q9UK53.2 ING1_HUMAN RecName: Full=Inhibitor of growth protein 1<br/>MSFVECPYHSPAERLVAEADDEGGPSAITGMGLCFRCLLFSFSGRSVGEVGGVLDLNVFGLGLQPWIGSSR<br/>CWGGPCSSALRCGWFSWPPPSKSAIPIGGSRGAGRVSRWPPHWLEAWRVSPPLSPLSPATFGRGFI<br/>AVAVIPGLWARGRCSSDRLPRPAGPARRQFQAASLLTRGWGRAWPWKQILKELDECYERFSRETGDAQK<br/>RRLMLHCVQRALIRSQELGDEKIQIVSQMVLENRTRQVDSHVELFEAQQELGDTAGNSGKAGADRPKGE<br/>AAAQADKPNKRSRRQRNNENRENASSNHDDGASGTPKEKKAKTSKKKRSKAKAEREASPADLPIDP<br/>NEPTYCLCNQVSYGEMIGCDNDECEIWFHFSCVGLNHKPKGKWCPCPCRGENEKTMDKALEKSKKERAY<br/>NR</p> <p><b>Notes</b><br/>The REASPADLP motif, which has homology to 14-3-3 consensus binding sites is located between the NLS and PHD regions. Serine 199 represents a candidate phosphorylation site for regulating 14-3-3 binding. (Gong et al 2006). <u>N.B. This site has a proline at +1.</u></p> <p><b>References to 14-3-3 binding to p33ING1b</b><br/>Gong W, Russell M, Suzuki K, Riabowol K. Subcellular targeting of p33ING1b by phosphorylation-dependent 14-3-3 binding regulates p21WAF1 expression. Mol Cell Biol. 2006 Apr;26(8):2947-54.</p>                                                                                                                                                                                                                                                                                                                                                                                                                                                                                                                                                                                                                                                                                                                                                                                                                                                                                                                                                                                                                                                                                                                                  |                                                                                                       |
| <p><b>Human IRS1</b> Insulin receptor substrate 1 (Swissprot = P35568)</p> <p>1 MASPPESDGF SDVRKVGYLKPKSMHKKRFF VLRAASEAGG PARLEYEENE KKWRHKSSAP<br/>61 KRSIPLSESC NINKRADSKN KHLVALYTRD EHFAIAADSE AEQDSWYQAL LQLHNRAKGH<br/>121 HDGAAALGAG GGGGSCSGSS GLGEAGEDLS YGDVPPGPAF KEVWQVILKP KGLGQTKNLI<br/>181 GIYRLCLTSK TISFVKLNSE AAAVLQLMN IRRCGHSENF FFEIVGRSAV TGPGEFWMQV<br/>241 DDSVVAQNMH ETILEAMRAM SDEFPRRSKs QSSSNCNPI SVPLRRHHLN NPPPSQVGLT<br/>301 RRSRTESITA TSPASVMGGK PGSFRVRASS DGEGTMSRPA SVDGSPVSPS TNRTHAHRHR<br/>361 GSARLHPPLN HSRsIPMPAS RCSPSATSVP SLSSSSTSGH GSTSDCLFPR RSSASVSGSP<br/>421 SDGGFISSE YGSSPCDFRS SFRSVPDLSL GHTPPARGEE ELSNYICMGK KGPSTLTAPN<br/>481 GHYILSRGGN GHRCTPGTGL GTSPALAGDE AASAADLNR FRKRTHSAGT SPTITHQKTP<br/>541 SQSSVASIEE YTEMMPAYPP GGGSGRLPG HRHSFAFVTR SYPEEGLEMH PLERRGGHHR<br/>601 PDSSTLHTDD GYMPMSPGVA PVPSSGRKGS DYMPPSPKVS sAPQQIINPI RRHPQRVDPN<br/>661 GYMMSPSPGG CSPDIGGSPS SSSSSNAVP SGTSYGLWT NGVGGHSHV LPHPKPPVES<br/>721 SGMKLLPCTG DYMNMSPVGD SNTSSPDCY YGPEDPQHKP VLSYSLPRS FKHTQRPEP<br/>781 EEGARHQHLR LSTSSGRLLY AATADSSSS TSDDSLGGGY CGARLEPSLP HPHHQVLQPH<br/>841 LPRKVDATAQ TNSRLARPTR LSLGDPKAST LPRAREQQQ QPPLLHPEP KSPGEYVNI<br/>901 FMGSDQSGYLS GPVAFHSSPS VRCPSQLQPA PREETGTTEE YMKMDLGPGR RAAWQESTGV<br/>961 EMDRGLPAPP GAASICRPTR AVPSRGRDYM TMQMSPCRQS YVDTSPAAPV SYADMRGTIA<br/>1021 AEEVSLPRAT MAAASSSSAA SASPTGPQGA AELAHSLL GGPQGGGMS AFTRVNLSPN<br/>1081 RNQSAKVIRA DPQGCRRRHS SETFSSTPSA TRVGNTVFPF AGAAVGGGGG SSSSSEVVKR<br/>1141 HSSASFENW LRPGELGGAP KEPAKLCGAA GLEENGLNYI DLDLVKDFKQ CPQECTPEPQ<br/>1201 PPPPPPHQ LGSSESSSTR RSSEDLAYA SISFQKQPED RQ</p> <p>&gt;gi 547738 sp P35568.1 IRS1_HUMAN RecName: Full=Insulin receptor substrate 1; Short=IRS-1<br/>MASPPESDGFSDVRKVGYLKPKSMHKKRFFVLRAASEAGGPARLEYEENEKKWRHKSSAPKRSIPLSESC<br/>NINKRADSKNHLVALYTRDEHFAIAADSEAEQDSWYQALLQLHNRAKGHHDGAAALGAGGGGSCSGSS<br/>GLGEAGEDLSYGDVPPGPAFKEVWQVILKPKGLGQTKNLIGIYRLCLTSKTI S FVKLNSEAAAVLQLMN<br/>IRRCGHSENF FFEIVGRSAV TGPGEFWMQV DSDVVAQNMHETILEAMRAMSDEFPRRSKsQSSSNCNPI<br/>SVPLRRHHLN NPPPSQVGLTRRSRTESITATSPASVMGGKPGSFRVRASSDGEGTMSRPA SVDGSPVSPS<br/>TNRTHAHRHRSGARLHPPLNHSRSIPMPASRCSPSATSVPVLSSSSTSGHGSTSDCLFPRRSASVSGSP<br/>SDGGFISSEY GSSPCDFRS SFRSVPDLSL GHTPPARGEE ELSNYICMGK KGPSTLTAPN GHYILSRGGN<br/>GHRCTPGTGLGTS PALAGDE AASAADLNR FRKRTHSAGT SPTITHQKTP SQSSVASIEE YTEMMPAYPP<br/>GGGSGRLPGHRHSFAFVTRSYPEEGLEMHPLERRGGHHRPDSSTLHTDDGYMPMSPGVA PVPSSGRKGS<br/>DYMPPSPKVSAPQIINPIRRHPQRVDPN GYMMSPSPGGSPDIPGSSSSNAVP SGTSYGLWT<br/>NGVGGHSHV LPHPKPPVES SGMKLLPCTGDYMMNMSPVGD SNTSSPDCY YGPEDPQHKP VLSYSLPRS<br/>FKHTQRPEPEEGARHQHLRLSTSSGRLLYAATADSSSSSTSDSLGGGYCGARLEPSLP HPHHQVLQPH</p> |                                                                                                       |

LPRKVDTAQTNSRLARPTRLSLGDFKASTLPRAREQQQQQQPLLHPPEPKSPGEYVNIIEFGSDQSGYLS  
 GPVAFHSSPSVRCPSQLQAPAREEETGTEEYMKMDLGPGRRAAWQESTGVEMGRGLPAPPGAASI CRPTR  
 AVPSRGRDYMTMQMSCPRQSYVDTSFAAPVSYADMRTGIAAEVSLPRATMAAASSSSAASASPTGPQGA  
 AELAAHSSLLGGPQGGMSAFTRVNLSPNRNQS AKVIRADPQGCRRRHSSETFSTPSATRVGNTVFPFG  
 AGAAVGGGGSSSSSEDEVKRHSSASFENVWLRPGELGGAPKEPAKLCGAAGGLENLNYIDLVLKDFKQ  
 CPQECTPEPQPPPPPHQPLGSGESSSTRRSSEDL SAYASISFQKQPEDRQ

**Notes**

The following phosphopeptides bound to 14-3-3s and displaced them from IRS-1 in in vitro competition assays:  
 DEFRPRSK[pS]QSSSNC ([pS] corresponds to Ser-270 in human IRS-1), HPPLNHSR[pS]IPMPAS (Ser-374 in  
 human IRS-1), MPMSPKSV[pS]APQQII (Ser-641 in human IRS-1) (Ogihara et al 1997). Of these sites, only  
 Ser270 and Ser374 have been demonstrated to be phosphorylated in vivo in several studies  
 (<http://www.phosphosite.org/>). Sequence alignment indicates that IRS-1 contains at least five putative 14-3-3  
 binding sites. Three of them are within the amino-terminal portion of the molecule that is important for the  
 interaction of IRS-1 with the insulin receptor and PI3K and might contribute to its subcellular localization (Xiang  
 et al 2002).

**References to 14-3-3-binding to IRS1**

Oriente F, Andreozzi F, Romano C, Perruolo G, Perfetti A, Fiory F, Miele C, Beguinot F, Formisano P. Protein  
 kinase C-alpha regulates insulin action and degradation by interacting with insulin receptor substrate-1 and 14-3-3  
 epsilon. *J Biol Chem.* 2005 Dec 9;280(49):40642-9.  
 Xiang X, Yuan M, Song Y, Ruderman N, Wen R, Luo Z. 14-3-3 facilitates insulin-stimulated intracellular  
 trafficking of insulin receptor substrate 1. *Mol Endocrinol.* 2002 Mar;16(3):552-62.  
 Craparo A, Freund R, Gustafson TA. 14-3-3 (epsilon) interacts with the insulin-like growth factor I receptor and  
 insulin receptor substrate I in a phosphoserine-dependent manner. *J Biol Chem.* 1997 Apr 25;272(17):11663-9.  
 Ogihara T, Isobe T, Ichimura T, Taoka M, Funaki M, Sakoda H, Onishi Y, Inukai K, Anai M, Fukushima Y,  
 Kikuchi M, Yazaki Y, Oka Y, Asano T. 14-3-3 protein binds to insulin receptor substrate-1, one of the binding  
 sites of which is in the phosphotyrosine binding domain. *J Biol Chem.* 1997 Oct 3;272(40):25267-74.  
 Kosaki A, Yamada K, Suga J, Otaka A, Kuzuya H. 14-3-3beta protein associates with insulin receptor substrate 1  
 and decreases insulin-stimulated phosphatidylinositol 3'-kinase activity in 3T3L1 adipocytes. *J Biol Chem.* 1998  
 Jan 9;273(2):940-4.

**Human ITGA4 (CD49D) Integrin alpha4 (Swissprot = P13612)**

```

1 MAWEARREPG PRRAAVRETV MLLLCLGVPT GRPYNVDTES ALLYQGPHT LFGYSVVLHS
61 HGANRWLLVG APTANWLANA SVINPGAIYR CRIGKNPGQT CEQLQLGSPN GEPCGKTCLE
121 ERDNQWLGV LSRQPGENG IVCGRHRWKN IFYIKNENKL PTGGCYGPPP DLRTLSKRI
181 APCYQDYVKK FGENFASCQA GISSFYTKDL IVMGAPGSSY WTGSLFVYNI TTNKYKAFLD
241 KQNQVKFGSY LGYSVAGHF RSQHTTEVVG GAPQHEQIGK AYIFSIDEKE LNILHEMKGK
301 KLGSYFGASV CAVDLNADGF SDLLVGAPMQ STIREGRVF VYINSGSGAV MNAMEINLVG
361 SDKYAARFGE SIVNLGDIID DGFEDVAIGA PQEDDLQGA IYINGRADGI SSTFSQRIEG
421 LQISKSLSMF GQISGQIDA DNNGYVDVAV GAFRSDSAVL LRTRPVVIVD ASLSHPESVN
481 RTKFCVENG WPSVICIDLT CFSYKGEVPGYIVLFYNMS LDVNRKAESP PRFYFSSNGT
541 SDVITGSIQV SSREANCRTH QAFMRKDVRD ILTPIQIEAA YHLGPHVISK RSTEEFPLQ
601 PILQKKEKD IMKKTINFAR FCAHENC SAD LQVSAKIGFL KPHENKTYLA VGSMTLMLN
661 VSLFNAGDDA YETTLHVKLP VGLYFIKILE LEEKQINCEV TDNSGVVQLD CSIGYIYVDH
721 LSRIDISFLL DVSSLSRAEE DLSITVHATC ENEEEMDNLK HSRVTVAIPL KYEVKLVTHG
781 FVNPTSFVYV SVDENEPETC MVEKMNLFH VINTGNSMAP NVSVEIMVFN SFSPQTDKLF
841 NILDVQTTTGE CHFENYQQRV CALEQQKSAM QTLKGIVQFL SKTDKRLLYC IKADPHCLNF
901 LCNFGKMESG KEASVHIQLE GRPSILEMDE TSALKFEIRA TGFPEPNPRV IELNKDENVA
961 HVLLLEGLHHQ RPKRYFTIVI ISSSLLGLI VLLLSISVMW KAGFFKRQYK SILQEENRRD
1021 SWSYNSKSN DD

```

>gi|215274002|sp|P13612.2|ITA4 HUMAN RecName: Full=Integrin alpha-4; AltName:  
 Full=Integrin alpha-IV; AltName: Full=VLA-4; AltName: Full=CD49 antigen-like  
 family member D; AltName: CD antigen=CD49d; Flags: Precursor

```

MAWEARREPGPRRAAVRETVMLLCLGVPTGRPYNVDTESALLYQGPHTLFGYSVVLHSHGANRWLLVG
APTANWLANASVINPGAIYRCRIGKNPGQTCQLQLGSPNGEPCGKTCLEERDNQWLGVTLRSRQGENGS
IVTCGRHRWKNIFYIKNENKLPTGGCYGPPDLRTELSKRIAPCYQDYVKKFGENFASCQAGISSFYTKDL
IVMGAPGSSYWTGSLFVYNI TTNKYKAFLDKQNQVKFGSYLGYSVAGHFGRSHTTEVVGAPQHEQIGK
AYIFSIDEKELNILHEMKGKLGYSVAGHFCAVDLNADGFSDLLVGAPMQSTIREEGRVFFVYINSGSGAV
MNAMEINLVGSDKYAARFGE SIVNLGDIIDNDFEDVAIGA PQEDDLQGA IYINGRADGISSTFSQRIEG
LQISKSLSMFGQISGQIDADNNGYVDVAVGAFRSDSAVLLRTRPVVIVDASLSHPESVNRKFCVENG
WPSVICIDLTLCFSYKGEVPGYIVLFYNMSLDVNRKAESP PRFYFSSNGTSDVITGSIQVSSREANCRTH
QAFMRKDVRDILTPIQIEAA YHLGPHVISKRSTEEFPLQIPILQKKEKDIMKKTINFARFCAHENC SAD
LQVSAKIGFLKPHENKTYLA VGSMTLMLNLSVLFNAGDDAYETTLHVKLPVGLYFIKILELEEKQINCEV
TDNSGVVQLDCSIGYIYVDHLSRIDISFLLDVSSLSRAEEDLSITVHATCENEEMDNLKHSRVTVAIPL
KYEVLKLVTHG FVNPTSFVYV SVDENEPETCMVEKMNLFH VINTGNSMAP NVSVEIMVFN SFSPQTDKLF
NILDVQTTTGECHFENYQQRVCALEQQKSAMQTLKGIVQFLSKTDKRLLYC IKADPHCLNFCNFGKMESG
KEASVHIQLEGRPSILEMDETSALKFEIRA TGFPEPNPRV IELNKDENVAHVLLLEGLHHQRPKRYFTIVI
ISSSLLGLIVLLLSISVMWKAGFFKRQYK SILQEENRRDSWSYNSKSNDD

```

**Notes**

Deakin et al (2009) used a different version because residue numbers don't match although sequence around 14-3-3  
 binding motif is the same. Y991 in paper (Y1024 here)

**RQYKSIL** – 14-3-3 binding motif with pS978 in paper (S1011 here)

**ENRRD SWSY** – paxillin binding region with S988 a known PKA phosphorylation site (S1021 here).

S978A decreases metabolic labeling of integrin alpha 4 with 32P-orthophosphate

FRET analysis found an interaction between 14-3-3 zeta and integrin  $\alpha 4$  "The interaction between  $\alpha 4$  integrin and  
 14-3-3 $\zeta$  is enhanced by the direct association between 14-3-3 $\zeta$  and paxillin, resulting in the formation of a ternary  
 complex that stabilizes the recruitment of each component. The ternary complex focuses Cdc42 activity at

|                                                                                                                                                                                                                                                                                                                                                                                                                                                                                                                                                                                                                                                                                                                                                                                                                                                                                                                                                                                                                                                                                                                                                                                                                                                                                                                                                                                                                                                                                                                                                                                                                                                                                                                                                                                                                                                                                                                                                                                                                                                                                                                                                                                                                                                                                                                                                                                                                                                                                                                                                                                                  |                                    |
|--------------------------------------------------------------------------------------------------------------------------------------------------------------------------------------------------------------------------------------------------------------------------------------------------------------------------------------------------------------------------------------------------------------------------------------------------------------------------------------------------------------------------------------------------------------------------------------------------------------------------------------------------------------------------------------------------------------------------------------------------------------------------------------------------------------------------------------------------------------------------------------------------------------------------------------------------------------------------------------------------------------------------------------------------------------------------------------------------------------------------------------------------------------------------------------------------------------------------------------------------------------------------------------------------------------------------------------------------------------------------------------------------------------------------------------------------------------------------------------------------------------------------------------------------------------------------------------------------------------------------------------------------------------------------------------------------------------------------------------------------------------------------------------------------------------------------------------------------------------------------------------------------------------------------------------------------------------------------------------------------------------------------------------------------------------------------------------------------------------------------------------------------------------------------------------------------------------------------------------------------------------------------------------------------------------------------------------------------------------------------------------------------------------------------------------------------------------------------------------------------------------------------------------------------------------------------------------------------|------------------------------------|
| <p>lamellipodial leading edge”.</p> <p>“Here, we show that MSP-mediated PI3K pathway activation induces Ron serine phosphorylation at residue 1394 as well as <math>\alpha\beta4</math> phosphorylation in the connecting sequence to generate 14-3-3 binding sites on both molecules. Thus, dimeric 14-3-3 proteins mediate the MSP-dependent formation of a Ron/<math>\alpha\beta4</math> complex that in turn induces disassembly of HDs and <math>\alpha\beta4</math> relocation at lamellipodia. Further, <math>\alpha\beta1</math> integrin activation and keratinocyte spreading/migration on laminin-5 takes place. All these findings suggest a role for Ron and 14-3-3 in epidermal reepithelization processes” (Santoro et al 2003)</p> <p><b>References to 14-3-3 binding to integrin alpha4</b></p> <p>Deakin NO, Bass MD, Warwood S, Schoelermann J, Mostafavi-Pour Z, Knight D, Ballestrem C, Humphries MJ. An integrin-alpha4-14-3-3zeta-paxillin ternary complex mediates localised Cdc42 activity and accelerates cell migration. <i>J Cell Sci.</i> 2009 May 15;122(Pt 10):1654-64.</p> <p><b>Santoro MM</b>, Gaudino G, Marchisio PC. The MSP receptor regulates alpha6beta4 and alpha3beta1 integrins via 14-3-3 proteins in keratinocyte migration. <i>Dev Cell.</i> 2003 Aug;5(2):257-71.</p>                                                                                                                                                                                                                                                                                                                                                                                                                                                                                                                                                                                                                                                                                                                                                                                                                                                                                                                                                                                                                                                                                                                                                                                                                                                                             |                                    |
| <p><b>Human ITGB1</b> Integrin beta 1 subunit (fibronectin receptor) (Swissprot = P05556)</p> <p>1 MNLQPIFWIG LISSVCCVFA QTDENRCLKA NAKSCGECIQ AGPNCGWCTN STFLQEGMPT<br/> 61 SARCDLLEAL KKKGCPDDI ENPRGSKDIK KKNVNTNRSK GTAELKLPED ITQIQPQLV<br/> 121 LRLRSGEPQT FTLKFKRAED YPIDLYYLM DLSYSMKDDLE NVKSLGTDLM NEMRRITSDF<br/> 181 RIGFGSFVEK TVMPYISTTP AKLRNPCTSE QNCTSPFSYK NVLSLTNKGE VFNELVKGQR<br/> 241 ISGNLDSPEG GFDAIMQVAV CGSLIGWRNV TRLLVFSSTA GFHFAGDGKL GGIVLPNDGQ<br/> 301 CHLENNMYTM SHYDYPSIA HLVQKLENN IQTIFAVTEE FQPVYKELKN LIPKSAVGT<br/> 361 SANSNVIQL IIDAYNSLSS EVILENGKLS EGVTSYKSY CKNGVNGTGE NGRKCSNISI<br/> 421 GDEVQFEISI TSNKCPKSDS SFKIRPLGF TEEVEVILQY ICECECQSEG IPESPKCHEG<br/> 481 NGTFECGACR CNEGRVGRHC ECSTDEVNSE DMDAYCRKEN SSEICSNNGE CVCGQCVCRK<br/> 541 RDNTNEIYSG KFCECDNFNC DRNGLICGG NGVCKCRVCE CNPNYTGSA CDSLDTSTCE<br/> 601 ASNGQICNGR GICECGVCKC TDPKFQGGTC EMCQTCLGVC AEHKECVQCR AFNKGEKKT<br/> 661 CTQECYFNI TKVESRDKLP QPVQDPVSH CEKDVDDCW FYFTYSVNGN NEVMVHVVEN<br/> 721 PECPTGPDII PIVAGVVAGI VLIQGLALLI WKLLMIHDR REFAKFEKEK MNAKWDGTGEN<br/> 781 PIYKSAVTTV VNPKYEGK</p> <p>&gt;gi 218563324 sp P05556.2 ITB1_HUMAN RecName: Full=Integrin beta-1; AltName: Full=Fibronectin receptor subunit beta; AltName: Full=Integrin VLA-4 subunit beta; AltName: CD_antigen=CD29; Flags: Precursor</p> <p>MNLQPIFWIGLISSVCCVFAQTDENRCLKANAKSCGECIQAGPNCGWCTNSTFLQEGMPTSARCDLLEAL<br/> KKKGCPPDDIENPRGSKDIKKNVNTNRSGTAELKLPEDITQIQPQLVLRRLRSGEPQFTLTKFKRAED<br/> YPIDLYYLM DLSYSMKDDLE NVKSLGTDLM NEMRRITSDFRIGFGSFVEKTVMPYISTTPAKLRNPCTSE<br/> QNCTSPFSYKNVLSLTNKGEVFNELVKGQRISGNLDSPEGGFDAIMQVAVCGSLIGWRNVTRLLVFSSTA<br/> GFHFAGDGKLGIVLPNDGQCHLENNMYTMSHYDYPSIAHLVQKLENNIQTIFAVTEEFQPVYKELKN<br/> LIPKSAVGTLSANSNVIQLIIDAYNSLSEVILENGKLEGGVTISYKSYCKNGVNGTGENGRKCSNISI<br/> GDEVQFEISITSNKCPKSDS SFKIRPLGFTEEVEVILQYICECECQSEGIPESPKCHEGNGTFECGACR<br/> CNEGRVGRHC ECSTDEVNSE DMDAYCRKENSSEICSNNGECVCGQCVCRKRDNTNEIYSGKFCECDNFNC<br/> DRNGLICGGNGVCKCRVCECNPNYTGSA CDSLDTSTCEASNGQICNGRGICECGVCKCTDPKFQGGTC<br/> EMCQTCLGVC AEHKECVQCR AFNKGEKKTCTQECYFNI TKVESRDKLPQPVQDPVSHCEKDVDDCW<br/> FYFTYSVNGNNEVMVHVVENPECPTGPDIIPIVAGVVAGI VLIQGLALLIWKLLMIHDRREFAKFEKEK<br/> MNAKWDGTGENPIYKSAVTTVVNPKYEGK</p> <p><b>Notes</b></p> <p>Reported to be a phosphorylation-independent interaction between 14-3-3 and integrin beta1</p> <p><b>References to 14-3-3 binding to integrin beta1</b></p> <p>Han DC, Rodriguez LG, Guan JL. Identification of a novel interaction between integrin beta1 and 14-3-3beta. <i>Oncog</i> 2001 Jan 18;20(3):346-57</p> |                                    |
| <p><b>Human ITGB2</b> Integrin beta 2 subunit. (Swissprot = P05107)</p> <p>1 MLGLRPPLLA LVGLLSLGCV LSQECTKFKV SSCRECIESG PGCTWCQKLN FTGPGDPDSI<br/> 61 RCDTRPQLLM RGCAADDIMD PTLAETQED HNGGQKQLSP QKVTLYLPRG QAAAFNVTFR<br/> 121 RAKGYPIDLY YLMDLSYSML DDLRNVKLLG DILLRALNEI TESGRIGFGS FVDKTVLPFV<br/> 181 NTHPDKLRNP CPNKEKECQP PFAFRHVLKL TNNNQFQTE VGKQLISGNL DAPEGGLDAM<br/> 241 MQVAACPEEI GWRNVTRLLV FATDDGFHFA GDGKLGAILT PNDGRCHLED NLYKRSNEFD<br/> 301 YPSVQQLAHK LAENNIQPIF AVTSRMVKTY EKLTEIIPKS AVGELSEDSS NVVQLIKNAY<br/> 361 NKLSRVFLD HNALPDTLKV TYDSFCSNGV THRNQPRGDC DGVQINVPIT FQVKVTATEC<br/> 421 IQEQSFVIRA LGFTDIVTVQ VLPQCECRCR DQSRDRSLCH GKGFLCEGIC RCDTGYIGKN<br/> 481 CECQTQGRSS QELEGSCRKD NNSIICSLGL DCVCGQCLCH TSDVPGKLIY GQYCECDTIN<br/> 541 CERYNGQVCG GPGRGLCFEG KCRCHPGFEG SACQCERTTE GCLNPRRVEC SGRGRRCNV<br/> 601 CECHSGYQLP LCQCEPGCPS PCGKYISCAE CLKFEKGPFG KNCSAACPLG QLSNNPVKGR<br/> 661 TCKERDSEGC WVAITLEQQD GMDRYLIYVD ESRECVAGFN IAAIVGTVTA GIVLIGILLL<br/> 721 VIWKALIHLS DLREYRFEK EKLKQWNN NPLFKSAETT VMNPKFAES</p> <p>&gt;gi 124056465 sp P05107.2 ITB2_HUMAN RecName: Full=Cell surface adhesion glycoproteins LFA-1/CR3/p150,95 subunit beta; AltName: Full=Complement receptor C3 subunit beta; AltName: CD_antigen=CD18; Flags: Precursor</p> <p>MLGLRPPLLALVGLLSLGCVLSQECTKFKVSSCRECIESGPGCTWCQKLNFTGPGDPDSIRCDTRPQLLM<br/> RGCAADDIMDPTSLAETQEDHNGGQKQLSPQKVTLYLPRGQAAAFNVTFRRAKGYPIDLYYLM DLSYSML<br/> DDLNRNKKLLGDLRALNEITSGRIGFGSFVDKTVLPFVNTHPDKLRNCPNKEKECQP PFAFRHVLKL<br/> TNNNQFQTEVGKQLISGNLDAPEGGLDAMMQVAACPEEIGWRNVTRLLVFATDDGFHFAFDGKLGAILT<br/> PNDGRCHLEDNLYKRSNEFDYPSVQQLAHKLAENNIQPIFAVTSRMVKTYEKLTEIIPKSAVGELEDSS<br/> NVVQLIKNAYNKLSRVFLDHNALPDTLKVTYDSFCSNGVTHRNQPRGDCDGVQINVPITFQVKVTATEC<br/> IQEQSFVIRALGFTDIVTVQVLPQCECRCDQSRDRSLCHGKGFLCEGICRCDTGYIGKNCECQTQGRSS<br/> QELEGSCRKD NNSIICSLGLDCVCGQCLCHTSDVPGKLIY GQYCECDTINCERYNGQVCGGPGRGLCFEG<br/> KCRCHPGFEGSACQCERTTEGCLNPRRVECSGRGRRCNVCECHSGYQLP LCQCEPGCPS PCGKYISCAE<br/> CLKFEKGPFGKNCSAACPLGQLSNNPVKGRTRCKERDSEGCWVAITLEQQD GMDRYLIYVDESRECVAGFN</p>                                                                                                                                                                                                                                                                                                                                                                                                                                                                                                      | <p>Thr758 only for<br/>WEBLOGO</p> |

IAAIVGGTVAGIVLIGILLVLIWKALIHLSDLREYRRFEKEKLKSKQWNNNDNPLFKSATTTVMNPKFAES  
 >gi|124056465|sp|P05107.2|ITB2\_HUMAN RecName: Full=Integrin beta-2; AltName:  
 Full=Cell surface adhesion glycoproteins LFA-1/CR3/p150,95 subunit beta;  
 AltName: Full=Complement receptor C3 subunit beta; AltName: CD\_antigen=CD18;  
 Flags: Precursor  
 MLGLRPPLLALVGLLSLGCVLSQECTKFKVSSCRECIESGPGCTWCQKLNFTGPGDPDSIRCDTRPQLLM  
 RGCADDIMDPTSLAETQEDHNGGQKQLSPQKVTLYLRPGQAAAFNVTFRRAKGYPIDLYLMDLSYSML  
 DDLRNVKKLGDDLRLALNEITESGRIGFGSFVDKTVLPFVNTHPDKLRNCPNKEKECQPPFAFRHVLKL  
 TNNSNQFQTEVKGQLISGNLDAPEGGDLAMMQVAACEEIGWRNVTRLLVFATDDGFHFAGDGKLGAILT  
 PNDGRCHLEDNLYKRSNEFDYPSVQQLAHKLAENNIQPIFAVTSRMVKTYEKLTEIIPKSAVGELEDSS  
 NVVQLIKNAYNKLSRVRFLDHNALPDTLKVITYDSFCSNGVTHRNQPRGDCDGVQINVPITFQVKVTATEC  
 IQEQSFVIRALGFTDITVTVLPQCECRCDQSRDRSLCHGKGFLECGICRCDTGYIGKNCECQTQGRSS  
 QELEGSCRKDNNIIICSGLDGCVCGQCLCHTSDVPKGLIYGQYCECDTINCERYNGQVCGGPGRGLCFCG  
 KCRCHPGFEFSACQCERTTEGCLNPRRVECSGRGRRCNCVCECHSGYQLPLCQCEPCGCPSPCGKYISCAE  
 CLKFEKGFPGKNCASACPLQLSNPVPKGRCTKERDSEGCWVAYTLEQQDGMDRYLIYVDESRECVAGPN  
 IAAIVGGTVAGIVLIGILLVLIWKALIHLSDLREYRRFEKEKLKSKQWNNNDNPLFKSATTTVMNPKFAES

**Notes**

ITGB2 the integrin beta 2 subunit. Can combine with multiple partners resulting in different integrins. For example, beta 2 combines with the alpha L chain to form the integrin LFA-1, and combines with the alpha M chain to form the integrin Mac-1. Participates in cell adhesion as well as cell-surface mediated signaling. Defects are the cause of leukocyte adhesion deficiency type I (LAD1).

**From Fagerholm et al (2002)**

**S745** and **T758** are phosphorylated by PKC  $\beta\eta$  in vitro using an integrin peptide as substrate (RRFEK EKLKSKQWNNNDNPLFKSATTTVMNPKFAES)

Endogenous 14-3-3s from human leukocyte lysate was specifically pulled down on an agarose column that had been covalently coupled with phospho-**T758** peptide but not unphosphorylated peptide or phospho-**S756**.

Endogenous 14-3-3 from cytoplasmic and cytoskeletal fractions bound to phospho-**T758** column but not unphosphorylated column – most of the phosphorylated integrins reside in the cytoskeleton fraction.

Mass fingerprint of the endogenous 14-3-3s identified 14-3-3  $\beta$ and  $\zeta$

**S756** is an in vivo phosphorylation site induced by phorbol ester stimulation.

**From Takala et al (2008)**

Phorbol ester treatment (PDBu) of T cells leads to T758 phosphorylation, seen with a phosphospecific antibody. Peptide affinity columns corresponding to phospho-T758 and non-phospho-T758 were used to pulldown proteins from T cell lysates. 14-3-3 only interacted with phosphorylated peptide column while filamin showed preference for the non-phosphorylated column. When T758 is phosphorylated, 14-3-3s bind while filamin cannot bind so phosphorylation acts as a switch. Phosphorylation of T758 may lead to detachment of talin from the integrin tail.

**Notes**

ITGB2 the integrin beta 2 subunit. Can combine with multiple partners resulting in different integrins. For example, beta 2 combines with the alpha L chain to form the integrin LFA-1, and combines with the alpha M chain to form the integrin Mac-1. Participates in cell adhesion as well as cell-surface mediated signaling. Defects are the cause of leukocyte adhesion deficiency type I (LAD1).

|                                              |                         |           |
|----------------------------------------------|-------------------------|-----------|
| Integrin beta 1 (fibronectin receptor)       | 780 NPLY.....KSAVTTVV   | NP_002202 |
| Integrin beta 3 (platelet glycoprotein IIIa) | 770 NPLYKEA.....TSTFTNI | NP_000203 |
| Integrin beta-6                              | 759 NPLYR.....GSTSTFK   | A37057    |
| Integrin beta-7                              | 775 NPLYKS.....AITTTIN  | P26010    |

**References to 14-3-3 binding to integrin beta2**

Fagerholm S, Morrice N, Gahmberg CG, Cohen P. Phosphorylation of the cytoplasmic domain of the integrin CD18 chain by protein kinase C isoforms in leukocytes. *J Biol Chem.* 2002 Jan 18;277(3):1728-38.

Takala H, Nurminen E, Nurmi SM, Aatonen M, Strandin T, Takatalo M, Kiema T, Gahmberg CG, Yläne J, Fagerholm SC. Beta2 integrin phosphorylation on Thr758 acts as a molecular switch to regulate 14-3-3 and filamin binding. *Blood.* 2008 Sep 1;112(5):1853-62.

Nurmi SM, Gahmberg CG, Fagerholm SC. 14-3-3 proteins bind both filamin and alphaLbeta2 integrin in activated T cells. *Ann N Y Acad Sci.* 2006 Dec;1090:318-25.

The focus of the paper below was not on integrin beta2 but on c-Cbl  
 Co-ip of 14-3-3 with c-Cbl was enhanced after cells were allowed to adhere to fibrinogen in the presence of TNF when compared to control cells. It was reduced after pretreatment of cells with a PKC inhibitor. GF-109203X  
 Melander F, Andersson T, Dib K. Engagement of beta2 integrins recruits 14-3-3 proteins to c-Cbl in human neutrophils. *Biochem Biophys Res Commun.* 2004 May 14;317(4):1000-5.

Legate KR, Fässler R. Mechanisms that regulate adaptor binding to beta-integrin cytoplasmic tails. *J Cell Sci.* 2009 Jan 15;122(Pt 2):187-98.

**Human KANK1** kidney ankyrin repeat-containing protein 1 (aka ANKRD15) (Swissprot = Q14678)

```

1 MAHTTKVNGS ASGKAGDILS GDQDKEQKDP YFVETPYGYQ LDLDFLKYVD DIQKGNITKR
61 LNIQKRRKPS VPCPEPRTTS GQQGIWTSTE SLSSNSDDN KQCPNFLIAR SQVTSTPISK
121 PPPPLETSLP FLTIPENRQL PPPSPQLPKH NLHVTKTLM TRRRLEQERA TMQMTPEGFR
181 RPRLASFGGM GTTSSLPSFV GSGNHNPAKH QLQNGYQNG DYGSYAPAAP TTSSMGSSIR
241 HSPLSSGIST PVTNVSPMHL QHIREQMAIA LKRLKELEEQ VRTIPVLQVK ISVLQEEKRQ
301 LVSQLNQRA ASQINVCGVR KRSY SAGNAS QLEQLSRARR SGGELYIDYE EEMETVEQS
361 TQRIKEFRQL TADMQALEQK IQDSSCEASS ELRENGECRS VAVGAENMN DIVVYHRGRS
421 SKDAAVGTL VEMRNCGVSV TEAMLGVMTE ADKEIELQQQ TIESLKEKIY RLEVQLRETT
481 HDREMTKLKQ ELQAAGSRKK VDKATMAQPL VFSKVVEAVV QTRDQMVGSH MDLVDTCVGT
541 SVETNSVGIS CQPECKNKVV GPPELPMNWI VKERVEMHDR CAGRSVEMCD KSVSVESVVC
601 ETGSNTEESV NDLTLLKTNL NLKEVRSIGC GDCSVDTVTC SPKECASRGV NTEAVSQVEA
661 AVMAVPTAD QDTSTDLEQV HQFTNETAT LIESCNTCL STLDKQSTQ TVETRTVAVG
721 EGRVKDINSS TKTRSIGVGT LLSGHSFDR PSAVKTKEG VQGININDNY LVGLKMRITIA
781 CGPPQLTVGL TASRRSVGVG DDPVGESLEN PQPQAPLGM TGLDHYIERI QKLLAEQOTL
841 LAENYSELAE AFGEPHSQMG SLNSQLISTL SSINSVMKSA STEELRNPDF QKTSLGKITG

```

|                                                                                                                                                                                                                                                                                                                                                                                                                                                                                                                                                                                                                                                                                                                                                                                                                                                                                                                                                                                                                                                                                                                                                                                                                                                                                                                                                                                                                                                                                                                                                                                                                                                                                                                                                                                                                                                                                                                                                                                                                                                                                                                                                                                                                                                                                                                                                                                                                                                                                                                                                                                                                                                                                                                                                                                                                                                                                                                                                                                                                                                                                                                                                                                                                                                                                                                                                                                                                                                                                                                                                                                                                                                                                                                                                                                                                    |  |
|--------------------------------------------------------------------------------------------------------------------------------------------------------------------------------------------------------------------------------------------------------------------------------------------------------------------------------------------------------------------------------------------------------------------------------------------------------------------------------------------------------------------------------------------------------------------------------------------------------------------------------------------------------------------------------------------------------------------------------------------------------------------------------------------------------------------------------------------------------------------------------------------------------------------------------------------------------------------------------------------------------------------------------------------------------------------------------------------------------------------------------------------------------------------------------------------------------------------------------------------------------------------------------------------------------------------------------------------------------------------------------------------------------------------------------------------------------------------------------------------------------------------------------------------------------------------------------------------------------------------------------------------------------------------------------------------------------------------------------------------------------------------------------------------------------------------------------------------------------------------------------------------------------------------------------------------------------------------------------------------------------------------------------------------------------------------------------------------------------------------------------------------------------------------------------------------------------------------------------------------------------------------------------------------------------------------------------------------------------------------------------------------------------------------------------------------------------------------------------------------------------------------------------------------------------------------------------------------------------------------------------------------------------------------------------------------------------------------------------------------------------------------------------------------------------------------------------------------------------------------------------------------------------------------------------------------------------------------------------------------------------------------------------------------------------------------------------------------------------------------------------------------------------------------------------------------------------------------------------------------------------------------------------------------------------------------------------------------------------------------------------------------------------------------------------------------------------------------------------------------------------------------------------------------------------------------------------------------------------------------------------------------------------------------------------------------------------------------------------------------------------------------------------------------------------------------|--|
| <p>901 NYLGYTCKCG GLQSGSPLSS QTSQPEQEVG TSEGKPISSL DAFPTQEGTL SPVNLTDQI<br/> 961 AAGLYACTNN ESTLKSIMKK KDGKNSNGA KKNLQFVGIN GGYETTSDD SSSDESSSE<br/> 1021 SDDECDVIEY PLEEEEEED EDTRGMAEGH HAVNIEGLKS ARVEDEMVOQ ECEPEKVEIR<br/> 1081 ERYELSEKML SACNLLKNTI NDPKALTSKD MRFCLNTLQH EWFVRSSQKS AIPAMVGDYI<br/> 1141 AAFAEISPVD LRYVINLADG NGNTALHYSV SHSNFEIVKL LLDADVCNVD HQNKAGYTP<br/> 1201 MLAALAAVEA EKDMRIVEEL FCGGDVNAKA SQAGQTALML AVSHGRIDMV KGLLACGADV<br/> 1261 NIQDDEGSTA LMCASEGHV EIVKLLAQF GCNGHLEDND GSTALSIALE AGHKDIAVLL<br/> 1321 YAHVNFKAQ SPGTPRLGRK TSPGTHRGS FD</p> <p>&gt;gi 73920184 sp Q14678.3 KANK1_HUMAN RecName: Full=KN motif and ankyrin repeat domain-containing protein 1; AltName: Full=Ankyrin repeat domain-containing protein 15; AltName: Full=Kidney ankyrin repeat-containing protein MAHTTKVNGSASGKAGDILSGDQDKEQKDPYFVETPYGYQLDLDLFLKYVDDIQKGNITKRLNIQKRRKPS VPCPEPRTTSGQQGJWSTSTESLSSNSDDNKQCPNFLIARSQVTSPTPISKPPPLETSLPFLTIPENRQL PPPSPQLPKHNLHVTKTLMETRRLEQERATMQMTPGEFRFRPLASFGGMGTSSLSFVSGSNHNPAKH QLQNGYQNGDYGSAAPAAEYIAAFAEISPVDLRYVINLADGNGNTALHYSVSHSNFEIVKLLDADVCNVD VRTIPVLQVKISVLQEEKRLVSSQLKNQRAASQINVCVGRKRSYSAGNASQLEQLSRARRISGGELYIDYE EEMETVEQSTQRIKEFRQLTADMQALEQIQDSSCEASSELRENGEGRSVAVGAENMNDIVVYHRGSR SCKDAAVGTLVEMRNCVSVTEAMLGVMTADKEIELQQQTIESLKEKIYRLEVQLRETTDREMTKLKQ ELQAAGSRKKVDKATMAQPLVFSKVVEAVVQTRDQMVGSHMDLVDTCVGTSVETNSVSGISCQPECKNKVV GPPELPMNWWIVKERVEMHDCAGRSVEMCDKSVSVSVETGTSNTEESVNDLTLKTNLNLKEVRSIGC GDSCVDVTVCSPEKASRGVNTAASQVEAAVMAVPTADQDTSTDLQVHQFTNTETATLIESCTNTCL STLDKQTSQTQVETRTVAVGEGRVKIDINSSTKTRSIGVGTLLSGHSGFDRPSAVKTKESGVGQININDNY LVGLKMRITACGQPLTVGLTASRRSVGVGDDPVGESLENPQPQAPLGMGTGLDHYIERIQKLLAEQQTLL LAENYSELAEAFGEFHSQMGSLNSQLISTLSSINSVMKSASTHEELRNPDFQKTSLGKITGNYLGYTCKCG GLQSGSPLSSQTSQPEQEVGTSEGKPISSLDAPPTQEGTILSPVNLTDQIAAGLYACTNNESTLKSIMKK KDGKNSNGAKKNLQFVINGGYYETTSDDSSSDESSSSESDDECDVIEYPLEEEEEEDTRGMAEGH HAVNIEGLKSARVEDEMVOQECEPEKVEIRERYELSEKMLSACNLLKNTINDPKALTSKDMRFLCLNTLQH EWFVRSSQKS AIPAMVGDYIAAFAEISPVDLRYVINLADGNGNTALHYSVSHSNFEIVKLLDADVCNVD HQNKAGYTPIMLAALAAVEAEKDMRIVEELFCGGDVNAKASQAGQTALMLAVSHGRIDMVKGLLACGADV NIQDDEGSTALMCASEGHVEIVKLLAQFPGCNGHLEDNDGSTALSIALEAGHKDIAVLLYAHVNFKAQ SPGTPRLGRKTSPTGTHRGSFD</p> <p><b>Notes</b><br/> Deletion of the ANKRD15 gene at 9p24.3 causes parent-of-origin-dependent inheritance of familial cerebral palsy. The Kank family of proteins, Kank1–Kank4, are characterized by their unique structure, coiled-coil motifs in the N-terminal region, and ankyrin-repeats in the C-terminal region, with an additional motif, the KN motif, at the N-terminus. Kank is KANK potential tumour suppressor for renal cell carcinoma and an Akt substrate located downstream of PI3K and a 14-3-3-binding protein. The interaction between Kank and 14-3-3 is regulated by insulin and EGF and is mediated through phosphorylation of Kank by Akt. Q14678 is the KANK-L (long isoform), whereas Kakinuma et al (2008) must have studied the KANK-S form, which lacks the N-terminal 158 amino acids, because they report the phosphorylated residue to be Ser167 (NVCGVRKRSYsAGNASQLEQL). (Variants described in Wang Y, Onishi Y, Kakinuma N, Roy BC, Aoyagi T, Kiyama R. Alternative splicing of the human Kank gene produces two types of Kank protein. <i>Biochem Biophys Res Commun.</i> 2005 May 20;330(4):1247-53.)</p> <p><b>References to 14-3-3 binding to KANK1</b><br/> Kakinuma N, Roy BC, Zhu Y, Wang Y, Kiyama R. (2008) Kank regulates RhoA-dependent formation of actin stress fibers and cell migration via 14-3-3 in PI3K-Akt signaling. <i>J Cell Biol.</i> 181(3):537-49<br/> Kakinuma N, Zhu Y, Wang Y, Roy BC, Kiyama R. Kank proteins: structure, functions and diseases. <i>Cell Mol Life Sci.</i> 2009 Aug;66(16):2651-9.</p> |  |
| <p><b>Human KCNK3</b> Two-pore-domain potassium channel TASK-1 (Swissprot = O14649)<br/> 1 MKRQNVRTLA LIVCTFTYLL VAAVFDAL SEPELIERQR LELRQQLRA RYNLSQGGYE<br/> 61 ELERVVLRK PHKAGVQWRF AGSFYFAITV ITTIGYGHAA PSTDGGKVFC MFYALLGIPL<br/> 121 TLVMFQSLGE RINTLVRYLL HRAKKGGLMR RADVSMANMV LIGFFSCIST LCIGAAAFSH<br/> 181 YEHWTFQAY YCFITLTTI GFGDYVALQK DQALQTPQY VAFSFVYILT GLTVIGAFNL<br/> 241 LVVLFMRTMN AEDEKRDAEH RALLTRNGQA GGGGGGSAH TDTASSTAA AGGGGFRNVY<br/> 301 AEVLFHQSMC SCLWYKSREK LQYSIPMIIP RDLSTSDTCV EQSHSSPGGG GRYSPTPSRR<br/> 361 CLCSGAPRSA ISSVSTGLHS LSTFRGLMKR RS<sup>5</sup>V</p> <p>&gt;gi 13124040 sp O14649.1 KCNK3_HUMAN RecName: Full=Potassium channel subfamily K member 3; AltName: Full=Acid-sensitive potassium channel protein TASK-1; AltName: Full=TWIK-related acid-sensitive K(+) channel 1; AltName: Full=Two pore potassium channel KT3.1<br/> MKRQNVRTLALIVCTFTYLLVAAVFDALSEPELIERQRLELRQQLRARRYNLSQGGYEELEERVVLRK PHKAGVQWRFAGSFYFAITVITTTIGYGHAAAPSTDGGKVFCMFYALLGIPLTLVMFQSLGERINTLVRYLL HRAKKGGLMRADVSMANMVLIGFFSCISTLCIGAAAFSHYEHWTFQAYYCFITLTTIGFGDYVALQK DQALQTPQYVAFSFVYILTGLTVIGAFNLVLLVLFMRTMNAEDEKRDAEHRAALLTRNGQAGGGGGGSAH TDTASSTAAAGGGGFRNVYAEVLFHQSMCSCLWYKSREKLQYSIPMIIPRDLSTSDTCVEQSHSSPGGG GRYSPTPSRRCLCSGAPRSAISSVSTGLHSLSTFRGLMKRRSSV</p> <p><b>Notes</b><br/> RRSpS<sup>393</sup>V-COOH</p> <p><b>References to 14-3-3 binding to KCNK3</b><br/> O'Kelly I, Butler MH, Zilberberg N, Goldstein SA. Forward transport. 14-3-3 binding overcomes retention in endoplasmic reticulum by dibasic signals. <i>Cell.</i> 2002 Nov 15;111(4):577-88.<br/> Zuzarte M, Heusser K, Renigunta V, Schlichthörl G, Rinné S, Wischmeyer E, Daut J, Schwappach B, Preisig-Müller R. Intracellular traffic of the K+ channels TASK-1 and TASK-3: role of N- and C-terminal sorting signals and interaction with 14-3-3 proteins. <i>J Physiol.</i> 2009 Mar 1;587(Pt 5):929-52.</p>                                                                                                                                                                                                                                                                                                                                                                                                                                                                                                                                                                                                                                                                                                                                                                                                                                                                                                                                                                                                                                                                                                                                                                                                                                                                                                                                                                                                                                                                                                                                                                                                                                                                                                                                                                                                                                                                                   |  |
| <p><b>Human KCNK9</b> Two-pore-domain potassium channel TASK-3 (Swissprot = Q9NPC2)<br/> 1 MKRQNVRTLS LIVCTFTYLL VAAVFDAL SDHEMREEEK LKAEIEIRIKG KYNISSEDYR<br/> 61 QLELVILQSE PHRAGVQWKF AGSFYFAITV ITTIGYGHAA PGTDAGKAFV MFYAVLGIPL</p>                                                                                                                                                                                                                                                                                                                                                                                                                                                                                                                                                                                                                                                                                                                                                                                                                                                                                                                                                                                                                                                                                                                                                                                                                                                                                                                                                                                                                                                                                                                                                                                                                                                                                                                                                                                                                                                                                                                                                                                                                                                                                                                                                                                                                                                                                                                                                                                                                                                                                                                                                                                                                                                                                                                                                                                                                                                                                                                                                                                                                                                                                                                                                                                                                                                                                                                                                                                                                                                                                                                                                                          |  |

|                                                                                                                                                                                                                                                                                                                                                                                                                                                                                                                                                                                                                                                                                                                                                                                                                                                                                                                                                                                                                                                                                                                                                                                                                                                                                                                                                                                                                                                                                                                                                                                                                                                                                                                                                                                                                                                                                                                                                                                                                                                                                                                                                                                                                                                                                                                                                                                                                                                                                                                                                                                                                                                                                                                                                                                                                                                                                                                                                                                                                                                                                                                                                                                                                                             |  |
|---------------------------------------------------------------------------------------------------------------------------------------------------------------------------------------------------------------------------------------------------------------------------------------------------------------------------------------------------------------------------------------------------------------------------------------------------------------------------------------------------------------------------------------------------------------------------------------------------------------------------------------------------------------------------------------------------------------------------------------------------------------------------------------------------------------------------------------------------------------------------------------------------------------------------------------------------------------------------------------------------------------------------------------------------------------------------------------------------------------------------------------------------------------------------------------------------------------------------------------------------------------------------------------------------------------------------------------------------------------------------------------------------------------------------------------------------------------------------------------------------------------------------------------------------------------------------------------------------------------------------------------------------------------------------------------------------------------------------------------------------------------------------------------------------------------------------------------------------------------------------------------------------------------------------------------------------------------------------------------------------------------------------------------------------------------------------------------------------------------------------------------------------------------------------------------------------------------------------------------------------------------------------------------------------------------------------------------------------------------------------------------------------------------------------------------------------------------------------------------------------------------------------------------------------------------------------------------------------------------------------------------------------------------------------------------------------------------------------------------------------------------------------------------------------------------------------------------------------------------------------------------------------------------------------------------------------------------------------------------------------------------------------------------------------------------------------------------------------------------------------------------------------------------------------------------------------------------------------------------------|--|
| <p>121 TLVMFQSLGE RMNTFVRYLL KRIKCCGM R NTDVSMENMV TVGFFSCMGT LCIGAAAFSQ<br/> 181 CEEWFFHAY YCFITLTTI FGFYVALQT KGALQKKPLY VAFSFMYLIV GLTVIGAFLN<br/> 241 LVVLRFLTMN SEDERRDAEE RASLAGNRNS MVIHIPEEPR PSRPRYKADV PDLQSVCSCT<br/> 301 CYRSQDYGGR SVAPQNSFSA KLAPHYFHSI SYKIEEISPS TLKNSLFPSP ISSISPLGHS<br/> 361 FTDHQRMLMKR RKS</p> <p>&gt;gi 13431426 sp Q9NPC2.1 KCNK9_HUMAN RecName: Full=Potassium channel subfamily K member 9; AltName: Full=Acid-sensitive potassium channel protein TASK-3; AltName: Full=TWIK-related acid-sensitive K(+) channel 3; AltName: Full=Two pore potassium channel KT3.2</p> <p>MKRQNVRTLIVCTFTYLLVGAAVFDALESDEMREEEKLKAEEIRIKGKYNISSEDRQLELVILQSE<br/> PHRAGVQWKFAFSFYFAITVITIGYGHAAFGTDAGKAFMFAVLGIPLTLVMFQSLGERMNTFVRYLL<br/> KRIKCCGM RNTDVS MENMVTGFFSCMGTLCIGAAAFSQCEEWSFFHAYYCFITLTTIGFYGVALQT<br/> KGALQKKPLYVAFSFMYLIVGLTVIGAFNLVLRFLTMNSEDERRDAEEERASLAGNRNSMVIHIPEEPR<br/> PSRPRYKADV PDLQSVCSCTCYRSQDYGGRSVAPQNSFSAKLAPHYFHSISYKIEEISPS TLKNSLFPSP<br/> ISSISPLGHSFTDHQRMLMKRRKSV</p> <p><b>Notes</b><br/> RRKpS<sup>373</sup>V<sub>-COOH</sub></p> <p><b>References to 14-3-3 binding to KCNK9</b><br/> Zuzarte M, Heusser K, Renigunta V, Schlichthörl G, Rinné S, Wischmeyer E, Daut J, Schwappach B, Preisig-Müller R. Intracellular traffic of the K+ channels TASK-1 and TASK-3: role of N- and C-terminal sorting signals and interaction with 14-3-3 proteins. <i>J Physiol.</i> 2009 Mar 1;587(Pt 5):929-52.</p>                                                                                                                                                                                                                                                                                                                                                                                                                                                                                                                                                                                                                                                                                                                                                                                                                                                                                                                                                                                                                                                                                                                                                                                                                                                                                                                                                                                                                                                                                                                                                                                                                                                                                                                                                                   |  |
| <p><b>Human KIF1C</b> (Kinesin-like protein KIF1C) (Swissprot = O43896)</p> <p>1 MAGASVKVAV RVRPFNARET SQDAKCVVSM QGNTTSI INP KQSKDAPKSF TFDYSYWSHT<br/> 61 STEDPQFASQ QQVYRDIGEE MLLHAFEGYN VCFAYGQTG AGKSYTMMGR QEPGQGGIVP<br/> 121 QLCEDLFSRV SENQSAQLSY SVEVSYMEIY CERVRDLLNP KSRGSLRVRE HPILGPYVQD<br/> 181 LSKLAVTSYA DIADLMDCGN KARTVAATNM NETSSRSHAV FTIVFTQRCH DQLTGLDSEK<br/> 241 VSKISLVDLA GSERADSSGA RGMRLKEGAN INKSLTTLGK VISALADMQS KKRKSDFIYP<br/> 301 RDSVLTWLLK ENLGGNSRTA MIAALSPADI NYEETLSTLR YADRTKQIRC NAIINEDPNA<br/> 361 RLIRELQEEV ARLRELLMAQ GLSASALEGL KTEEGSVRGA LPAVSSPPAP VSPSSPTTHN<br/> 421 GELEPSFSPN TESQIGPEEA MERLQETEKI IAELNETWEE KLRKTEALRM EREALLAEMG<br/> 481 VAVREDGGTV GVFSFKKTPH LVNLNEDPLM SECLLYHIKD GVTRVGVQDM DIKLTGQFIR<br/> 541 EQHCLFRSIP QPDGEVVVTL EPCEGAETVY NGKLVTEPLV LKSGNRIVMG KNHVFRFNHP<br/> 601 EQARLEREREG VPPPPGPPSE PVDWNFAQKE LLEQQGIDIK LEMEKRLQDL ENQYRKEKEE<br/> 661 ADLLEQQRL YADSDSGDDS DKRSCEESWR LISSLREQLP PTTVQTVKRC CGLPSSGKRR<br/> 721 APRRVYQIPQ RRLQGGKDP WATMADLMQ AVKEICYEVA LADFRHGRAE IEALAALKMR<br/> 781 ELCRTYKPD GPGDAWRAVA RDVWDTVGEE EGGGAGSGGG SEEGARGAEV EDLRAHIDKL<br/> 841 TGILQEVKQL NSSKDRELQA LRDRMLRMER VIPLAQDHED ENEEGGEVPW APPEGSEAAE<br/> 901 EAAPSDRMP S ARPPSPPLSS WERVSRLMEE DPAFRGRRLR WLKQEQRLRQ GLQSGGGRGG<br/> 961 GLRRPFAFV PPHDCKLRF FKSNPQHRES WPGMGSGEAP TPLQPPEEVT PHPATPARRP<br/> 1021 PSRRSHHP RNSLDGGGRS RGAGSAQPEP QHFQPKKHNS YPQPPQPYPA QRPPGPRYP<br/> 1081 YTTPRMRQ RSAPDLKESG AAV</p> <p>&gt;gi 116242606 sp O43896.3 KIF1C_HUMAN RecName: Full=Kinesin-like protein KIF1C</p> <p>MAGASVKVAVRVRPFNARETSQDAKCVVSMQGNTTSI INPKQSKDAPKSF TFDYSYWSHTSTEDPQFASQ<br/> QQVYRDIGEEMLLHAFEGYNVCFAYGQTGAGKSYTMMGRQEPGQGGIVPQLCEDLFSRVSENQSAQLSY<br/> SVEVSYMEIYCERVRDLLNPKSRGSLRVREHPILGPYVQDLSKLAVTSYADIADLMDCGNKARTVAATNM<br/> NETSSRSHAVFTIVFTQRCHDQLTGLDSEKSVKISLVDLAGSERADSSGARGMRLKEGANINKSLTTLGK<br/> VISALADMQS KKRKSDFIYPYRDSVLTWLLKENLGGNSRTAMIAALSPADINYEETLSTLR YADRTKQIRC<br/> NAIINEDPNARLIRELQEEVARLRELLMAQGLSASALEGLKTEEGSVRGA LPAVSSPPAPVSPSSPTTHN<br/> GELEPSFSPN TESQIGPEEA MERLQETEKI IAELNETWEE KLRKTEALRM EREALLAEMG VAVREDGGTV<br/> GVFSFKKTPH LVNLNEDPLM SECLLYHIKD GVTRVGVQDM DIKLTGQFIREQHCLFRSIP QPDGEVVVTL<br/> EPCEGAETVY NGKLVTEPLV LKSGNRIVMG KNHVFRFNHP EQARLEREREG VPPPPGPPSE PVDWNFAQKE<br/> LLEQQGIDIK LEMEKRLQDL ENQYRKEKEE ADLLEQQRL YADSDSGDDS DKRSCEESWR LISSLREQLP<br/> PTTVQTVKRC CGLPSSGKRR APRRVYQIPQ RRLQGGKDP WATMADLMQ AVKEICYEVA LADFRHGRAE<br/> IEALAALKMR ELCRTYKPD GPGDAWRAVA RDVWDTVGEE EGGGAGSGGG SEEGARGAEV EDLRAHIDKL<br/> TGILQEVKQL NSSKDRELQA LRDRMLRMER VIPLAQDHED ENEEGGEVPW APPEGSEAAE EAAPSDRMP<br/> S ARPPSPPLSS WERVSRLMEE DPAFRGRRLR WLKQEQRLRQ GLQSGGGRGG LRRPFAFV PPHDCKLRF<br/> FKSNPQHRES WPGMGSGEAP TPLQPPEEVT PHPATPARRP PSRRSHHP RNSLDGGGRS RGAGSAQPEP<br/> QHFQPKKHNS YPQPPQPYPA QRPPGPRYP YTTPRMRQ RSAPDLKESG AAV</p> <p><b>Notes</b><br/> RRQRS<sup>1092</sup>AP</p> <p><b>References to 14-3-3 binding to KIF1C</b><br/> Dorner C, Ullrich A, Häring HU, Lammers R. The kinesin-like motor protein KIF1C occurs in intact cells as a dimer and associates with proteins of the 14-3-3 family. <i>J Biol Chem.</i> 1999 Nov 19;274(47):33654-60.</p> |  |
| <p><b>Human KLC2</b> (Swissprot = Q9H0B6)</p> <p>1 MAMVFPREE KLSQDEIVLG TKAVIQGLET LRGEHRALLA PLVAPEAGEA EPGSQERCIL<br/> 61 LRRSLEAIEL GLGEAQVILA LSSHGAVES EKQKLRQVR RLVQENQWLR EELAGTQQKL<br/> 121 QRSEQAVQAL EEEKQHLLFM SQIRKLDEDA SPNEEKGDVP KDTLDDLFEN EDEQSPAPSP<br/> 181 GGGDVSGQH GYEIPARLRT LHNLSVIQYAS QGRYEVAVPL CKQALEDLEK TSGHDHPDVA<br/> 241 TMLNILALVY RDQNKYKEAA HLLNDALAIR EKTGKDHFA VAATLNNLAV LYGKRGKYKE<br/> 301 AEPLCKRALE IREKVLGKFH PDVAKQLSNL ALLCQNGKA EEVEYYRRA LEIYATRLGP<br/> 361 DDPNVAKTN NLASCYLKQG KYQDAETLYK EILTRAHEKE FGSVNGDNKP IWMHAEERE<br/> 421 SKDKRRDSAP YGEYSWYKA CKVDSPTVNT TLRS LGALYR RQKLEAAHT LEDCASRNK<br/> 481 QGLDPASQTK VVELLDKGS RRGDRSSRD MAGGAGPRSE SDLEDVGPTA EWNGDGSGL<br/> 541 RRSFGFKLR DALRRSSEML VKKLQGGTPQ EPNPRMKRA SLLNFLNKSVEEPTQPGGTG<br/> 601 LSDSRTLSS SMDLSRRSSL VG</p>                                                                                                                                                                                                                                                                                                                                                                                                                                                                                                                                                                                                                                                                                                                                                                                                                                                                                                                                                                                                                                                                                                                                                                                                                                                                                                                                                                                                                                                                                                                                                                                                                                                                                                                                                                                                                                                                                                                                                                                                                                                                                                                                                                                                                                                                                                                                                                                                 |  |

|                                                                                                                                                                                                                                                                                                                                                                                                                                                                                                                                                                                                                                                                                                                                                                                                                                                                                                                                                                                                                                                                                                                                                                                                                                                                                                                                                                                                                                                                                                                                                                                                                                                                                                                                                                                                                                                                                                                                                                                                                                                                                                                                                                                                                                                                                                                                                                                                                                                                       |  |
|-----------------------------------------------------------------------------------------------------------------------------------------------------------------------------------------------------------------------------------------------------------------------------------------------------------------------------------------------------------------------------------------------------------------------------------------------------------------------------------------------------------------------------------------------------------------------------------------------------------------------------------------------------------------------------------------------------------------------------------------------------------------------------------------------------------------------------------------------------------------------------------------------------------------------------------------------------------------------------------------------------------------------------------------------------------------------------------------------------------------------------------------------------------------------------------------------------------------------------------------------------------------------------------------------------------------------------------------------------------------------------------------------------------------------------------------------------------------------------------------------------------------------------------------------------------------------------------------------------------------------------------------------------------------------------------------------------------------------------------------------------------------------------------------------------------------------------------------------------------------------------------------------------------------------------------------------------------------------------------------------------------------------------------------------------------------------------------------------------------------------------------------------------------------------------------------------------------------------------------------------------------------------------------------------------------------------------------------------------------------------------------------------------------------------------------------------------------------------|--|
| <p>&gt;gi 13878553 sp Q9H0B6.1 KLC2_HUMAN RecName: Full=Kinesin light chain 2; Short=KLC 2</p> <p>MAMVFVPREEKLSQDEIVLGTKAVIQGLETLRGEHRALLAPLVAPEAGEAEFGSQERCILLRRSLEAIEL<br/> GLGEAQVILALSSHLGAVESEKQKLRQVRRVLQENQWLREELAGTQQKLRSEQAVAQLEEEKQHLLFM<br/> SQIRKLEDEDASPNEKGDVDPKDTLDDLFPNEDEQSPAPSPGGGDVSGQHGGEYIIPARLRLHNLVIQYAS<br/> QGRYEVAVPLCKQALDLEKTSBGHDHPDVAATMLNIALVYRDQNKYKEAAHLLNDALAIREKTLGKDHPA<br/> VAATLNNLAVLYGKRGKYKEAEPKCKRALEIREKVLGKGFHPDVAKQLSNLALLCQNGKAEVEVEYYRRA<br/> LEIYATRLGPDPPNVAKTNNLASCYLKQKGYQDAETLYKEILTRAHEKEFGSVNGDNKPIWMHAEEREE<br/> SKDKRRDSAPYGEYSWKACKVDSPTVNTLRSGLALYRRQKLEAAHTLEDCASTRNRKQGLDPASQTK<br/> VVELLKDGSGRRDRSSRDMMAGGAPRSESDLEDVGPTEAWNGDGSGLRSGSFGKLRDALRRSSEML<br/> VKKLQGGTQPPEPNPRMKRASSLNLNKSVEEPTQPGGTGLSDSRTLSSSSMDLSRRSSLVG</p> <p><b>Notes</b><br/> KLC2 Kinesin is a microtubule-associated force-producing protein that may play a role in organelle transport. The light chain may function in coupling of cargo to the heavy chain or in the modulation of its ATPase activity. Subsequent analysis showed that 14-3-3 directly binds to kinesin heterodimers through interaction with KLC2 and that this interaction is dependent on the phosphorylation of KLC2. Studies on the interaction between 14-3-3 and KLC2 variants expressed in cultured cells coupled with mass spectrometric analysis proved that Ser575 (RAS(pS575)LNFL) in mouse KLC2 (6680578) is the site of phosphorylation in KLC2 that is responsible for the in vivo interaction with the 14-3-3 protein (= Ser582 in human KLC2 Q9H0B6).</p> <p><b>References to 14-3-3 binding to kinesin light chain 2</b><br/> Ichimura T, Wakamiya-Tsuruta A, Itagaki C, Taoka M, Hayano T, Natsume T, Isobe T. Phosphorylation-dependent interaction of kinesin light chain 2 and the 14-3-3 protein. <i>Biochemistry</i>. 2002 Apr 30;41(17):5566-72<br/> Pozuelo Rubio M, Geraghty KM, Wong BH, Wood NT, Campbell DG, Morrice N, Mackintosh C. 14-3-3-affinity purification of over 200 human phosphoproteins reveals new links to regulation of cellular metabolism, proliferation and trafficking. <i>Biochem J</i>. 2004 Apr 15;379(Pt 2):395-408.</p>                                                                                                                                                                                                                                                                               |  |
| <p><b>Human KRT18</b> Keratin 18 (Swissprot = P05783)</p> <p>1 MSFTTRSTFS TNYRSLGVSQ APSYGARVPS SAA<sup>S</sup>VYAGAG GSGSRISVSR STSFRGGMGS<br/> 61 GGLATGIAGG LAGMGGIQNE KETMQSLNDR LASYLDRVRS LETENRRLES KIREHLEKKG<br/> 121 PQVRDWSHYF KIIEDLRAQI FANTVDNARI VLQIDNARLA ADDFRVKYET ELAMRQSVEN<br/> 181 DIHGLRKYVID DTNITRLQLE TEIEALKEEL LFMKKNHEEE VKGLQAQIAS SGLTVEVDAP<br/> 241 KSQDLAKIMA DIRAQYDELA RKNREELDKY WSQQIEEST VVTQSAEVG AAETTLTELRL<br/> 301 RTVQSLEIDL DSMRNLKASL ENSLREVEAR YALQMEQLNG ILLHLESELA QTRAEGQRQA<br/> 361 QEYEALLNIK VKLEAEIATY RRLLEDGEDF NLGDALDSSN SMQTIQKTTT RRIVDGKVVV<br/> 421 ETNDTKVLRH</p> <p>&gt;gi 125083 sp P05783.2 K1C18_HUMAN RecName: Full=Keratin, type I cytoskeletal 18; AltName: Full=Cytokeratin-18; Short=CK-18; AltName: Full=Keratin-18; Short=K18; AltName: Full=Cell proliferation-inducing gene 46 protein</p> <p>MSFTTRSTFSTNYRSLGVSQAPSYGARVPSAASVYAGAGGSGSRISVSRSTSFRRGGMGSGGLATGIAGG<br/> LAGMGGIQNEKETMQSLNDRLASYLDRVRSLETENRRLESKIREHLEKKGQVRDWSHYFKI IEDLRAQI<br/> FANTVDNARIVLQIDNARLAADDFRVKYETELAMRQSVENDIHGLRKYVIDDTNITRLQLETEIEALKEEL<br/> LFMKKNHEEEVKGLQAQIASGLTVEVDAPKSDLAKIMADIRAQYDELARKNREELDKYWSQQIEESTT<br/> VVTQSAEVGAAETTLTELRLRTVQSLEIDLDSMRNLKASLENSLREVEAR YALQMEQLNG ILLHLESELA<br/> QTRAEGQRQAQEYEALLNIKVKLEAEIATYRRLLEDGEDFNLGDALDSSNSMQTIQKTTTTRIVDGKVVV<br/> ETNDTKVLRH</p> <p><b>Notes</b><br/> Shear stress activates PKC {zeta}, which then phosphorylates K18pSer33 and promotes the interaction of 14-3-3 with KIFs (Ser33 = Ser34 in P05783)</p> <p><b>References to 14-3-3 binding to keratin 18</b><br/> Sivaramakrishnan S, Schneider JL, Sitikov A, Goldman RD, Ridge KM. Shear stress induced reorganization of the keratin intermediate filament network requires phosphorylation by protein kinase C zeta. <i>Mol Biol Cell</i>. 2009 Jun;20(11):2755-65.<br/> Liao J, Omary MB. 14-3-3 proteins associate with phosphorylated simple epithelial keratins during cell cycle progression and act as a solubility cofactor. <i>J Cell Biol</i>. 1996 Apr;133(2):345-57.<br/> Ku NO, Michie S, Resurreccion EZ, Broome RL, Omary MB. Keratin binding to 14-3-3 proteins modulates keratin filaments and hepatocyte mitotic progression. <i>Proc Natl Acad Sci U S A</i>. 2002 Apr 2;99(7):4373-8.<br/> Ku NO, Liao J, Omary MB. Phosphorylation of human keratin 18 serine 33 regulates binding to 14-3-3 proteins. <i>EMBO J</i>. 1998 Apr 1;17(7):1892-906.</p> |  |
| <p><b>Human KSR1</b> (kinase suppressor of Ras) (Swissprot = Q8IVT5)</p> <p>1 MDRAALRAAA MGEKKEGGGG GDAEAGGAGA AASRALQCCG QLQKLIDISI GSLRGLRTKC<br/> 61 AVSNDLTQQE IRTLEAKLVR YICKQRQCKL SVAPGERTPE LNSYPRFSDW LYTFNVRPEV<br/> 121 VQEIPRDLTL DALLEMNEAK VKETLRRCGA SGDECGRLQY ALTCLRKVTG LGGEHKEDSS<br/> 181 WSSLDARRES GSGPSTDTLS AASLPWPPGS SQLGRAGNSA QGPRISVSVA LPASDSPTPS<br/> 241 FSEGLSDTDCI PLHASGRLLTP RALHSFITPP TTPQLRRHTK LKPPRTPPP SRKVFQLLPS<br/> 301 FPTLTRSK<sup>S</sup>H ESQLGNRIDD VSSMRFDLSH GSPQMVRRDI GLSVTHRFST KSWLSQVCHV<br/> 361 CQKSMIFGVK CKHCRLKCHN KCTKEAPACR ISFLPLTLRL RTE<sup>S</sup>VPSDIN NPVDRAEAPH<br/> 421 FGTLPKALTK KEHPPAMNHL DSSSNPSTT SSTPSSPAPP PTSSNPSSAT TPNPSPGQR<br/> 481 DSRFNFPAA YFIHHRQQFIF PVPSAGHCWK CLLIAESLKE NAFNISAFAH AAPLPEAADG<br/> 541 TRLDDQPKAD VLEAHEAEAE EPEAGKSEAE DDEVEDDL P SRRRPWRGPI SRKASQTSVY<br/> 601 LQEWDPFEQ VELGEPICGG RWGRVHRGRW HGEVAIRLLE MDGHNQDHLK LFKKAVMNYR<br/> 661 QTRHENVVLF MGACMNPPHL AIITSFCKGR TLHSFVRDPK TSLDINKTRQ IAQEIIKGMG<br/> 721 YLHAKGIVHK DLKSKNVFYD NGKVVITDFG LFGISGVVRE GRRENQLKLS HDWLCLYLAPE<br/> 781 IVREMPGKD EDQLPFSKAA DVYAFGTWVY ELQARDWPLK NQAAEASIWQ IGSGEKMKRV<br/> 841 LTVSVSLGKEV SEILSACWAF DLQERPSFSL LMDMLEKLPK LNRRLSHPHG FWKSAEINSS<br/> 901 KVVPRFERFG LGVLESSNPK M</p> <p>&gt;gi 56749095 sp Q8IVT5.2 KSR1_HUMAN RecName: Full=Kinase suppressor of Ras 1<br/> MDRAALRAAAMGEKKEGGGGDAEAGGAGAAASRALQCCGQLQKLIDISIGSLRGLRTKCAVSNDLTQQE</p>                                                                                                                                                                                                                                                                                                                                                                                                                                                                                                                                                                                                                                                                                                                                                                                                                                                                                                                                                                                                  |  |

|                                                                                                                                                                                                                                                                                                                                                                                                                                                                                                                                                                                                                                                                                                                                                                                                                                                                                                                                                                                                                                                                                                                                                                                                                                                                                                                                                                                                                                                                                                                                                                                                                                                                                                                                                                                                                                                                                                                                                                                                                                                                                                                                                                                                                                                                                                                                                                                                                                                                                                                                                                                             |  |
|---------------------------------------------------------------------------------------------------------------------------------------------------------------------------------------------------------------------------------------------------------------------------------------------------------------------------------------------------------------------------------------------------------------------------------------------------------------------------------------------------------------------------------------------------------------------------------------------------------------------------------------------------------------------------------------------------------------------------------------------------------------------------------------------------------------------------------------------------------------------------------------------------------------------------------------------------------------------------------------------------------------------------------------------------------------------------------------------------------------------------------------------------------------------------------------------------------------------------------------------------------------------------------------------------------------------------------------------------------------------------------------------------------------------------------------------------------------------------------------------------------------------------------------------------------------------------------------------------------------------------------------------------------------------------------------------------------------------------------------------------------------------------------------------------------------------------------------------------------------------------------------------------------------------------------------------------------------------------------------------------------------------------------------------------------------------------------------------------------------------------------------------------------------------------------------------------------------------------------------------------------------------------------------------------------------------------------------------------------------------------------------------------------------------------------------------------------------------------------------------------------------------------------------------------------------------------------------------|--|
| <p>IRTLAEKLVRYICKQRQCKLSVAPGERTPELNSYPRFSDWLYTFNVRPEVQEIIPRDLTLDALLEMNEAK<br/>VKETLRRCGASGDECGRLQYALTCLRKVTGLGGEHKEDSSWSSLDARRESGSGPSTDTLSAASLPWPFP<br/>SGLGRAGNSAQGPRSI SVSALPASDPTPSFSEGLSDTCIPLHASGRLTPRALHSFITPPPTPQLRRHTK<br/>LKPRTPPPPSRKVFQLLPSFPTLRSKSHESQLGNRIDVSSMRFDLSHGSPQMVRRIIGLSVTHRFST<br/>KSWLSQVCHVCQKSMIFGVCKCHCLKCHNKCTKEAPACRISFLPLTRLRRTESVPSDINNVDRAAEPH<br/>FGTLPKALTKKEHPAMNHLDDSSNPSSTTSSTPSSPAPFPTSSNPSSATTPPNPSPGQRDRSRNFPAAY<br/>FIHHRQQFI FVPVPSAGHCWKLLIAESLKENAFNI SAFAHAAPLPEADGTRLDQPKADVLEAHEAEAE<br/>EPEAGKSEAEDDEVDLPSRRRWRGPTSRKASQTSVYLQEWDPFEQVELGEP IQGGRWGRVHRGRW<br/>HGEVAIRLLEMDGHNQDHLKLFKKEVMNYRQTRHENVVLFMGACMNPPLAIITSFCKGRTLHSFVRDPK<br/>TSLDINKTRQIAQEI IKMGYLAHAKGIVHKDLKSKNVFYDNGKVVITDFGLFGISGVVREGRRNLKLS<br/>HDWLCYLAPEIVREMPGKDEDQLPFSKAADVAFGTWVYELQARDWPLKNQAAEASIWQIGSGEGMKRV<br/>LTSVSLGKEVSEILSACWAFDLQERPSFSLMDMLEKLPKLNRRLSHPGHFKSAEINSSKVVPRFERFG<br/>LGVLESSNPKM</p> <p><b>Notes</b><br/>Two 14-3-3 binding sites are RSKpS<sup>297</sup>HE (=S309 in Q81VT5) and RTEpS<sup>392</sup>VP (= Ser404 in Q81VT5)<br/>KSR a serine/threonine kinase of the Raf family with no demonstrated kinase activity. KSR, 14-3-3 and Raf form<br/>an oligomeric signaling complex and that KSR positively regulates the Ras signaling pathway in vertebrate<br/>organisms.</p> <p><b>References to 14-3-3 binding to KSR1</b><br/>Xing H, Kornfeld K, Muslin AJ. The protein kinase KSR interacts with 14-3-3 protein and Raf. <i>Curr Biol.</i> 1997<br/>May 1;7(5):294-300<br/>Jagemann LR, Pérez-Rivas LG, Ruiz EJ, Ranea JA, Sánchez-Jiménez F, Nebreda AR, Alba E, Lozano J. The<br/>functional interaction of 14-3-3 proteins with the ERK1/2 scaffold KSR1 occurs in an isoform-specific manner. <i>J</i><br/><i>Biol Chem.</i> 2008 Jun 20;283(25):17450-62.<br/>Ory S, Zhou M, Conrads TP, Veenstra TD, Morrison DK. Protein phosphatase 2A positively regulates Ras<br/>signaling by dephosphorylating KSR1 and Raf-1 on critical 14-3-3 binding sites. <i>Curr Biol.</i> 2003 Aug<br/>19;13(16):1356-64.<br/>Müller J, Ory S, Copeland T, Piwnicka-Worms H, Morrison DK. C-TAK1 regulates Ras signaling by<br/>phosphorylating the MAPK scaffold, KSR1. <i>Mol Cell.</i> 2001 Nov;8(5):983-93.<br/>Cacace AM, Michaud NR, Therrien M, Mathes K, Copeland T, Rubin GM, Morrison DK. Identification of<br/>constitutive and ras-inducible phosphorylation sites of KSR: implications for 14-3-3 binding, mitogen-activated<br/>protein kinase binding, and KSR overexpression. <i>Mol Cell Biol.</i> 1999 Jan;19(1):229-40.</p> |  |
| <p><b>Human LCP2(SLP-76)</b> (Lymphocyte cytosolic protein 2, aka SLP-76) (Swissprot = Q13094)</p> <p>1 MALRNVPPFRS EVLGWDPDSL ADYFKKLNLYK DCEKAVKKYH IDGARFLNLT ENDIQKFPKL<br/>61 RVPIILSKLSQ EINKNEERS IFRTRKQVPR FPEETESHEE DNGGWSSFEEDDYESPNDDQ<br/>121 GDEDGDYES PNEEEAPVE DDADYEPPPS NDEEALQNSI LPAKPPNSN SMYIDRPPSG<br/>181 KTPQQFPVPP QRPMAALPPP PAGRNHSPLP PPQTNHEEPS RSRNHKTAKL PAPSIDRSTK<br/>241 PPLDRSLAPF DREPTLGGK PPFSDKPSIP AGRSLGEHLP KIQKPPLPPT TERHERSSPL<br/>301 PGKKPVPKPH GWGPDREND EDDVHQRLP QPALLPMSSN TFPSTRSTKPS PMNPLPSSHM<br/>361 PGAFSESNS FPQASLPPY FSGGPSNRPP IRAEGRNFPL PLPNKPRPPS PAEEENSINE<br/>421 EWYVSYITRP EAEALRKIN QDGTFLVRDS SKKTTTNPYV LMVLYKDKVY NIQIRYQKES<br/>481 QVYLLGTGLR GKEDFLSVSD IIDYFRKMPL LLIDGKNRGS RYQCTLTHAA GYP</p> <p>&gt;gi 10720065 sp Q13094.1 LCP2_HUMAN RecName: Full=Lymphocyte cytosolic<br/>protein 2; AltName: Full=SH2 domain-containing leukocyte protein of 76 kDa;<br/>AltName: Full=SLP-76 tyrosine phosphoprotein; Short=SLP76</p> <p>MALRNVPPFRSEVLGWDPSLADYFKKLNLYKDCEKAVKKYHIDGARFLNLTENDIQKFPKLRVPIILSKLSQ<br/>EINKNEERSIFRTRKQVPRFPEETESHEEDNGGWSSFEEDDYESPNDDQDGEDDGDYESPNEEEAPVE<br/>DDADYEPPPSNDEEALQNSILPAKPPNSNSMYIDRPPSGTKPQQFPVPPQRPMAALPPPAGRNHSPLP<br/>PPQTNHEEPSRSRNHKTAKLPAPSIDRSTKPPPLDRSLAPFDREPTLGGKPPFSDKPSIPAGRSLGEHLP<br/>KIQKPPLPPTTERHERSSPLPGKKPVPKPHGWGPDREND EDDVHQRLPQPALLPMSSNTFPSTRSTKPS<br/>PMNPLPSSHMPGAFSESNSFPQASLPPYFSGGPSNRPP IRAEGRNFPLPLPNKPRPPS PAEEENSINE<br/>EWYVSYITRPEAEALRKINQDGTFLVRDS SKKTTTNPYVLMVLYKDKVYNIQIRYQKESQVYLLGTGLR<br/>GKEDFLSVSDIIDYFRKMPLLLIDGKNRGSRYQCTLTHAAGYP</p> <p><b>Notes</b><br/>“Here, we identify 14-3-3epsilon and zeta proteins as SLP-76 binding partners. This interaction was induced by<br/>TCR ligation and required phosphorylation of SLP-76 at serine 376.”</p> <p><b>References to 14-3-3 binding to SLP-76</b><br/>Di Bartolo V, Montagne B, Salek M, Jungwirth B, Carrette F, Fournane J, Sol-Foulon N, Michel F, Schwartz O,<br/>Lehmann WD, Acuto O. A novel pathway down-modulating T cell activation involves HPK-1-dependent<br/>recruitment of 14-3-3 proteins on SLP-76. <i>J Exp Med.</i> 2007 Mar 19;204(3):681-91</p>                                                                                                                                                                                                                                                                                                                                                                                               |  |
| <p><b>Human LSR Isoform 2 of lipolysis-stimulated lipoprotein receptor</b> (Swissprot = Q86X29)</p> <p>1 MQQDGLGVGT RNSGSKGRSV HPSWFWCAPR PLRYFGRDAR ARRAQTAAMA LLAGGLSRGL<br/>61 GSHPAAGRD AVVFWLLLS TWCTAPARAI QVTVSNPYHV VILFQPVTLF CTYQMTSTPT<br/>121 QPIVIWKYS FCRDRIADAF SPASVDNQLN AQLAAGNPGY NPYVEQDQSV RTVRVATKQ<br/>181 NNAVTLGDY QGRRITITGN ADLTFDQTAW GDSGVYVCSV VSAQDLQGN EYAEELIVLG<br/>241 RTSGVAELLF GFQAGPIEDW LFWVVVCLAA FLIFLLLGIC WCQCCPHTCC CYVRCPCCPD<br/>301 KCCCPEALYA AGKAATSGVP SIYAPSTYAH LSPAKTPPP AMIPMGPAYN GYPGGYPGDV<br/>361 DRSSSAGGQG SYVPLLRD TD SSVASEVRSG YRIQASQDD SMRVLYYMEK ELANFDPSRP<br/>421 GPPSGRVERA MSEVTLSHED DWSRSPSRGP ALTPIRDEEW GHSRSPSRG WQEPAREQA<br/>481 GGGWRARRPR ARVDALDDL TPPSTAESGS RSPTSNGGRS RAYMPPRSRS RDDLVDQDSD<br/>541 RDFPRSRDPH YDDFRSREPR PADPRSHHR TRDPRDNGSR SGLDLPYDGR LEEAVRKKGS<br/>601 EERRRPHKEE EEEAYPPAP PPSYSETDQA SRERLKKNL ALSRESLWV</p> <p>&gt;gi 116242622 sp Q86X29.4 LSR_HUMAN RecName: Full=Lipolysis-stimulated<br/>lipoprotein receptor<br/>MQQDGLGVGTRNSGSKGRSVHPSWFWCAPRPLRYFGRDARARRAQTAAALLAGGLSRGLGSHPAAGRD<br/>AVVFWLLLSLWCTAPARAIQVTVSNPYHVILFQPVTLFCTYQMTSTPTQPIVIWKYSFCRDRIADAF</p>                                                                                                                                                                                                                                                                                                                                                                                                                                                                                                                                                                                                                                                                                                                                                                                                                                                                                                                                                                                                                                                                                                                                                                                                                                                                                                                                                                                                         |  |



|                                                                                                                                                                                                                                                                                                                                                                                                                                                                                                                                                                                                                                                                                                                                                                                                                                                                                                                                                                                                                                                                                                                                                                                                                                                                                                                                                                                                                                                                                                                                                                                                                                                                                                                                                                                                                                                                                                                                                                                                                                                                                                                                                                                                                                                                                                                                                                                                                                                                                                                                                                                                                                                                                                                                                                                                                                                                                                                                                                                                                                                                                                                                                                                                                                                                                                                                                                                                                                                                                                                                                                                                                                                                                                                                                                                                                                                                                                                                                                                                   |  |
|---------------------------------------------------------------------------------------------------------------------------------------------------------------------------------------------------------------------------------------------------------------------------------------------------------------------------------------------------------------------------------------------------------------------------------------------------------------------------------------------------------------------------------------------------------------------------------------------------------------------------------------------------------------------------------------------------------------------------------------------------------------------------------------------------------------------------------------------------------------------------------------------------------------------------------------------------------------------------------------------------------------------------------------------------------------------------------------------------------------------------------------------------------------------------------------------------------------------------------------------------------------------------------------------------------------------------------------------------------------------------------------------------------------------------------------------------------------------------------------------------------------------------------------------------------------------------------------------------------------------------------------------------------------------------------------------------------------------------------------------------------------------------------------------------------------------------------------------------------------------------------------------------------------------------------------------------------------------------------------------------------------------------------------------------------------------------------------------------------------------------------------------------------------------------------------------------------------------------------------------------------------------------------------------------------------------------------------------------------------------------------------------------------------------------------------------------------------------------------------------------------------------------------------------------------------------------------------------------------------------------------------------------------------------------------------------------------------------------------------------------------------------------------------------------------------------------------------------------------------------------------------------------------------------------------------------------------------------------------------------------------------------------------------------------------------------------------------------------------------------------------------------------------------------------------------------------------------------------------------------------------------------------------------------------------------------------------------------------------------------------------------------------------------------------------------------------------------------------------------------------------------------------------------------------------------------------------------------------------------------------------------------------------------------------------------------------------------------------------------------------------------------------------------------------------------------------------------------------------------------------------------------------------------------------------------------------------------------------------------------------|--|
| <p>SPASVDNQLNAQLAAGNPGYNYVEQCDSVRTVVRVATKQNAVTLGDYYQGRRTITIGNADLTFDQTAW<br/>GDSGVVYCSVVSVAQLDQGNNEAYAEILVLRGRTSGVAELLPFGFQAGPIEDWLFVWVCLAAFLIFLLLGIC<br/>WCQCCPHTCCCYVRCPCCPKCCPEALYAAGKAATSGVPSIYAPSTYAHLSPAKTPPPPAMIPMPGPAVN<br/>GYPGGYPGDVRSSSAGGQGSYVPLLRDRTDSSVASEVRSYRIQASQDDSMRVLYMEKELANFDPSPRP<br/>GPPSGRVERAMSEVTSLEDHDDWRSRPSRGPALTPIRDEEWGGHSPRSRPGWDQEPAREQAGGGWRARRPR<br/>ARSDALDDLTTPSTAESGSRSPSTNGGRSFRAYMPPRSRSDLDLYDQDDSRDFPFRSRDPHYDDFRSRERP<br/>PADPRSHHHRTRDPRDNGRSRSGDLPYDGRLLLEEAVRKKGSEERRRPHKEEEEEAYPPAPPYSETDSQA<br/>SRERRLKKNLALSRESLVV</p> <p><b>Notes</b><br/>Dubois et al (2009) reports that phosphoSer493 of LSR (RPRAR(pS493)LD provides one of the 14-3-3-binding sites on this protein, and this site was identified on the endogenous protein from HEK293 cells. In the reference sequence (Q86X29) the L at +1 is a V.</p> <p><b>References to 14-3-3 binding to LSR</b><br/>Dubois F, Vandermoere F, Gernez A, Murphy J, Toth R, Chen S, Geraghty KM, Morrice NA and MacKintosh C (2009) Differential 14-3-3-affinity capture reveals new downstream targets of PI 3-kinase signaling (Epub 2009 Aug 1)</p>                                                                                                                                                                                                                                                                                                                                                                                                                                                                                                                                                                                                                                                                                                                                                                                                                                                                                                                                                                                                                                                                                                                                                                                                                                                                                                                                                                                                                                                                                                                                                                                                                                                                                                                                                                                                                                                                                                                                                                                                                                                                                                                                                                                                                                                                                                                                                                                                                                                                                                                                                                                                                                                                                                                                                                                                                                                 |  |
| <p><b>Human MAP3K3 (MEKK3)</b> Protein kinase of the STE11 family (Swissprot = Q99759)</p> <p>1 MDEQEALNSI MNDLVALQMN RRHRMPGYET MKNKDTGHSN RQSDVRIKFE HNGERRIAF<br/>61 SRPVKYEDVE HKVTTVFGQP LDLHYMNNEL SILLKNQDDL DKAIDILDRS SSMKSLRILL<br/>121 LSQDRNHNSS SPHSGVSRQV RIKASQSAGD INTIYQPPPE RSRHLSVSSQ NPGRSSPPPG<br/>181 YVPERQOHIA RQGSYTSINS EGEFIPETSE QCMLDPLSSA ENSLSGSCQS LDRSADSPSF<br/>241 RKSRRMSRAQS FPDNRQEYSD RETQLYDKGV KGGTYPRRYH VSVHHKDYSD GRRFFPRIRR<br/>301 HQGNLFTLVP SSRSLSTNGE NMGLAVQYLD PRGRLRSADS ENALSVQERN VPTKSPSAPI<br/>361 NWRRGKLLGQ GAFGRVYLCY DVDTGRELAS KQVQDFDPS ETSKEVSALE CEIQLLKNLQ<br/>421 HERIVQYYGC LRDRAEKTIT IFMEYMPGGS VKDQLKAYGA LTESVTRKYT RQILEGMSYL<br/>481 HSNMIVHRDI KGANILRDSA GNVKLGDFGA SKRLQITCMS GTGMRSVTGT PYWMSPEVIS<br/>541 GEGYGRKADV WSLGCTVVEM LTEKPPWAEY EAMAAIFKIA TQPTNPQLPS HISEHRDPL<br/>601 RRIFFVEARQR PSAEELLTHH FAQLMY</p> <p>&gt;gi 160332306 sp Q99759.2 M3K3_HUMAN RecName: Full=Mitogen-activated protein kinase kinase kinase 3; AltName: Full=MAPK/ERK kinase kinase 3; Short=MEK kinase 3; Short=MEKK 3</p> <p>MDEQEALNSIMNDLVALQMNRRHRMPGYETMKNKDTGHSNRQSDVRIKFEHNGERRIAFSRPVKYEDVE<br/>HKVTTVFGQPLDLHYMNNELSIILLKNQDDDKAIDILDRSSSMKSLRILLLSQDRNHNSSSPHSGVSRQV<br/>RIKASQSAGDINTIYQPPPEPRSRHLSVSSQNPGRSSPPPGYVPERQOHIAHQGSYTSINSERGEFIPETSE<br/>QCMLDPLSSAENSLSGSCQSLDRSADSPSFRKSRRMSRAQSFPDNRQEYSDRETQLYDKGVKGGTYPRRYH<br/>VSVHHKDYSDGRRRFPRIARRHQGNLFTLVPSRSLSTNGENMGLAVQYLDPRGRLRSADSENALSVQERN<br/>VPTKSPSAPINWRRGKLLGQGAFGRVYLCYDVDTGRELASKQVQDFDPSETSKEVSALECEIQLLKNLQ<br/>HERIVQYYGCLRDRAEKTITIFMEYMPGGSVKDQLKAYGALTESVTRKYTRQILEGMSYLSHNMIVHRDI<br/>KGANILRDSAGNVKLGDFGASKRLQITCMSGTGMRSVTGTGYWMSPEVISGEGYGRKADVWSLGCTVVEM<br/>LTEKPPWAEYEAMAAIFKIAITQPTNPQLPSHISEHRDPLRRIFFVEARQRPSAEELLTHHFAQLMY</p> <p><b>Notes</b><br/>MEKK3 a protein kinase of the STE11 family. Phosphorylated and activated by MLK3 and TAK1. Phosphorylates and activates MEK5.<br/>Endogenous MEKK3 was phosphorylated on Ser526 in response to osmotic stress. In addition, phosphorylation of Ser526 was required for MKK6 phosphorylation in vitro, whereas dephosphorylation of Ser526 was mediated by protein phosphatase 2A and sensitive to okadaic acid and sodium fluoride. Finally, the association between MEKK3 and 14-3-3 was dependent on Ser526 and prevented dephosphorylation of Ser526.<br/>Phosphorylation of MEKK3 at threonine 294 promotes 14-3-3 association to inhibit nuclear factor kappaB activation (Matitau et al 2008).<br/>We identified two phosphorylated amino acids at Ser166 and Ser337 RSRHLSVSSQ However, neither of these phosphorylated amino acids is required for association with 14-3-3 protein or regulation of MEKK3-dependent ERK and JNK activity. Nonetheless, these results suggest that MEKK3 is a convergence point of multiple upstream signaling pathways. (Adams et al 2002).</p> <p><b>References to 14-3-3 binding to MAP3K3</b><br/>Matitau AE, Scheid MP. Phosphorylation of MEKK3 at threonine 294 promotes 14-3-3 association to inhibit nuclear factor kappaB activation. J Biol Chem. 2008 May 9;283(19):13261-8.<br/>Adams DG, Sachs NA, Vaillancourt RR. Phosphorylation of the stress-activated protein kinase, MEKK3, at serine 166. Arch Biochem Biophys. 2002 Nov 1;407(1):103-16<br/>Fritz A, Brayer KJ, McCormick N, Adams DG, Wadzinski BE, Vaillancourt RR. Phosphorylation of serine 526 is required for MEKK3 activity, and association with 14-3-3 blocks dephosphorylation. J Biol Chem. 2006 Mar 10;281(10):6236-45.<br/>Fanger GR, Widmann C, Porter AC, Sather S, Johnson GL, Vaillancourt RR. 14-3-3 proteins interact with specific MEK kinases. J Biol Chem. 1998 Feb 6;273(6):3476-83.<br/>Abbasi S, Lee JD, Su B, Chen X, Alcon JL, Yang J, Kellem RE, Xia Y. Protein kinase-mediated regulation of calcineurin through the phosphorylation of modulatory calcineurin-interacting protein 1. J Biol Chem. 2006 Mar 24;281(12):7717-26.</p> |  |
| <p><b>Human MAP3K5 (ASK1, MEKK5)</b> Mitogen-activated protein kinase kinase kinase 5 also known as Apoptosis signal-regulating kinase 1 (Swissprot = Q99683)</p> <p>1 MSTEADEGIT FSVPPFAPSG FCTIPEGGIC RRGGAADVGE GEEHQLPPPP PGFVWVESA<br/>61 AAPGIGCPAA TSSSSATRGR GSSVGGGSR TTVAYVINEA SQQLVVAES EALQSLREAC<br/>121 ETVGATLETL HFGKLDLFGT TVLDRFYND IAVVEMSDAF RQPSLFYHLG VRESFSMANN<br/>181 IILYCDTNSD SLQSLKEIIC QKNTMCTGNY TFVPMITPH NKVYCCDSFF MKGLTELMQP<br/>241 NFELLGPGIC LPLVDRFIQL LKVAQASSSQ YFRESILNDI RKARNLYTGK ELAAELARIR<br/>301 QRVDNIEVLT ADIVINLLLS YRDIQDYDSI VKLVETLEKL PTFDLASHHH VKFHYAFALN<br/>361 RRNLPGDRAK ALDIMIPMVQ SEGQVADSMY CLVGRIYKDM FLDSNFDTTE SRDHGASWFK<br/>421 KAFESEPTLQ SGINYAVLLL AAGHQFESSF ELRKGVGVKLS SLLGKKGNLE KLQSYWEVGF<br/>481 FLGASVLAND HMRVIQASEK LFKLKTPAWY LKSIVETILI YKHFVKLTTE QPVAKQELVD</p>                                                                                                                                                                                                                                                                                                                                                                                                                                                                                                                                                                                                                                                                                                                                                                                                                                                                                                                                                                                                                                                                                                                                                                                                                                                                                                                                                                                                                                                                                                                                                                                                                                                                                                                                                                                                                                                                                                                                                                                                                                                                                                                                                                                                                                                                                                                                                                                                                                                                                                                                                                                                                                                                                                                                                                                                                                                                                                                                                                                                                                                                                                                                           |  |

|                                                                                                                                                                                                                                                                                                                                                                                                                                                                                                                                                                                                                                                                                                                                                                                                                                                                                                                                                                                                                                                                                                                                                                                                                                                                                                                                                                                                                                                                                                                                                                                                                                                                                                                                                                                                                                                                                                                                                                                                                                                                                                                                                                                                                                                                                                                                                                                                                                                                                                                                                                                                                                                                                                                                                                                                                                                                                                                                                                                                                                                                                                                                                                                                                                                                                                                                                                                                                                                                                                                                                                                                                                                                                                                                                                                                                                                                                                                                                                                                                                                                                                                                                                                                                                                                                                                                                                                                                                                                                                                                                                                                                                                                                                                                                                                                                                                                                                                                                                                                                                                                                                                                                                                                                                                                                                                                                                                                                                                                                                                                                                                                                                                                                                                                                                                                                                                                                                                                                                                                                                                                                                                                                                                                                                                                                                                                         |                                                                                                             |
|-----------------------------------------------------------------------------------------------------------------------------------------------------------------------------------------------------------------------------------------------------------------------------------------------------------------------------------------------------------------------------------------------------------------------------------------------------------------------------------------------------------------------------------------------------------------------------------------------------------------------------------------------------------------------------------------------------------------------------------------------------------------------------------------------------------------------------------------------------------------------------------------------------------------------------------------------------------------------------------------------------------------------------------------------------------------------------------------------------------------------------------------------------------------------------------------------------------------------------------------------------------------------------------------------------------------------------------------------------------------------------------------------------------------------------------------------------------------------------------------------------------------------------------------------------------------------------------------------------------------------------------------------------------------------------------------------------------------------------------------------------------------------------------------------------------------------------------------------------------------------------------------------------------------------------------------------------------------------------------------------------------------------------------------------------------------------------------------------------------------------------------------------------------------------------------------------------------------------------------------------------------------------------------------------------------------------------------------------------------------------------------------------------------------------------------------------------------------------------------------------------------------------------------------------------------------------------------------------------------------------------------------------------------------------------------------------------------------------------------------------------------------------------------------------------------------------------------------------------------------------------------------------------------------------------------------------------------------------------------------------------------------------------------------------------------------------------------------------------------------------------------------------------------------------------------------------------------------------------------------------------------------------------------------------------------------------------------------------------------------------------------------------------------------------------------------------------------------------------------------------------------------------------------------------------------------------------------------------------------------------------------------------------------------------------------------------------------------------------------------------------------------------------------------------------------------------------------------------------------------------------------------------------------------------------------------------------------------------------------------------------------------------------------------------------------------------------------------------------------------------------------------------------------------------------------------------------------------------------------------------------------------------------------------------------------------------------------------------------------------------------------------------------------------------------------------------------------------------------------------------------------------------------------------------------------------------------------------------------------------------------------------------------------------------------------------------------------------------------------------------------------------------------------------------------------------------------------------------------------------------------------------------------------------------------------------------------------------------------------------------------------------------------------------------------------------------------------------------------------------------------------------------------------------------------------------------------------------------------------------------------------------------------------------------------------------------------------------------------------------------------------------------------------------------------------------------------------------------------------------------------------------------------------------------------------------------------------------------------------------------------------------------------------------------------------------------------------------------------------------------------------------------------------------------------------------------------------------------------------------------------------------------------------------------------------------------------------------------------------------------------------------------------------------------------------------------------------------------------------------------------------------------------------------------------------------------------------------------------------------------------------------------------------------------------------------------------------------|-------------------------------------------------------------------------------------------------------------|
| <p>541 FWMDFLVEAT KTDVTVVRFV VLILEPTKIY QPSYLSINNE VEEKTISIWH VLPDDKKGIH<br/> 601 EWNFSASSVR GVSISKFEER CCFLYVLHNS DDFQIYFCTE LHCKKFFEMV NTITEEKGRS<br/> 661 TEEGDCESDL LEYDYEYDEN GDRVVLGKGT YGIVYAGRDL SNQVRIAIKE IPERDSRYSQ<br/> 721 PLHEEIALHK HLKHKNIQY LGSFSENGFI KIFMEQVPGG SLSALLRSKW GPLKDNEQTI<br/> 781 GFYTKQILEG LKYLHDNQIV HRDIKGDNVL INTYSGVLKI SDFGTSKRRLA GINPCTETFT<br/> 841 GTLQYMAPEI IDKGPRGYGK AADIWSLGC T IEMATGKPP FYELGEPQAA MFKVGMFKVH<br/> 901 PEIPESMSAE AKAFILKCFE PDPDKRACAN DLLVDEFKLV SSKKKKTQPK LSALSAGSNE<br/> 961 YLRSTSLPVP VLVEDTSSSS EYGSVSPDTE LKVDPPFSFKT RAKSCGERDV KGIRTLFLGI<br/> 1021 PDENFEDHSA PPSPEEKDSG FFMLRKDSER RATLHRILTE DQDKIVRNLM ESLAQGAEEP<br/> 1081 KLKWEHITTL IASLREFVRS TDRKIIATTL SKLKLELDFD SHGISQVQV LFGFQDAVNE<br/> 1141 VLRNHNKIPH WMFALDSIIR KAVQTAITIL VPELRPHFSL ASESADTADQE DLDVEDDHEE<br/> 1201 QPSNQTVRRP QAVIEDAVAT SGVSTLSTV SHDSQSAHRS LNVQLGRMKI ETNRLLLELV<br/> 1261 RKEKELQALL HRAIEEKDQE IKHLKLSQP IEIPELVPFH LNSSGTNTED SELTDWLRVN<br/> 1321 GADEDTISRFLAEDYTLTLDV LYYVTRDDLK CLRRLRGGMLC TLWKAIDFR NKQT</p> <p>&gt;gi 6685617 sp Q99683.1 M3K5_HUMAN RecName: Full=Mitogen-activated protein kinase kinase 5; AltName: Full=MAPK/ERK kinase 5; Short=MEK kinase 5; Short=MEKK 5; AltName: Full=Apoptosis signal-regulating kinase 1; Short=ASK-1</p> <p>MSTEADEGITFSVPPFAPSGFCTIPEGGICRRGGAAAVGEGEEHQLPPPPPGSFWNVESAAAPGIGCPAA<br/> TSSSSATRGRGSSVGGGSRRTTVAYVINEASQQLVVAESEALQSLREACETVGATLETLLHFGKLDLFGET<br/> TVLDRFYNADIADVEMSDAFRQPSLFYHLGVRESFSMANNIILYCDTNSDSLQSLKEIICQKNTMCTGNY<br/> TFVPMYITPHNKVYCCDSSFMKGLTELMQPNFELLGPICLPLVDRFIQLLQVAQSSSQYFRESILNDI<br/> KARNLYTGKELAAELARIRQRVDNIEVLTADIVINLLLSYRDIQDYDSIVKLVEITLKLPTFDLASHHH<br/> VKFHYAFALNRRNLPGDRAKALDIMI PMVQSEGVASDMYCLVGRIYKDMFLDSNFTDTESRDHGASWFK<br/> KAFESPTLQSGINAVLLLAAGHQFESSFELRKGKLSLLGKKNLEKLSYWEVGFGLGASVLAND<br/> HMRVIQASEKLFKLTAPAWLKSIVETILYKHFVKTTEQPVAKQELVDFWMDFLVEATKTDVTVVRFV<br/> VLILEPTKIYQPSYLSINNEVEEKTISIWHVLPDDKKGIHEWNFSAASSVRGVSISKFEERCCFLYVLHNS<br/> DDFQIYFCTELHCKKFFEMVNTITEEKGRSTEEGDCESDLLEYDYEDENGDRVVLGKGTGIVYAGRDL<br/> SNQVRIAIKEI PERDSRYSQPLHEEIALHKLKHKNIQYLGSENGFIKIFMEQVPGGSLSALLRSKW<br/> GPLKDNEQTI GFYTKQILEGLKYLHDNQIVHRDIKGDNVLINTYSGVLKISDFGTSKRRLAGINPCTETFT<br/> GTLQYMAPEIIDKGPRGYGKAADIWSLGC T IEMATGKPPFYELGEPQAA MFKVGMFKVHPEIPESMSAE<br/> AKAFILKCFEPDPDKRACANDLLVDEFKLVSSSKKKKTQPKLSALSAGSNEYLRSISLPVPLVEDTSSSS<br/> EYGSVSPDTE LKVDPPFSFKTRAKSCGERDVKGIRTLFLGIPDENFEDHSA PPSPEEKDSGFFMLRKDSER<br/> RATLHRILTE DQDKIVRNLMESLAQGAEEP KKLKWEHITTL IASLREFVRS TDRKIIATTL SKLKLELDFD<br/> SHGISQVQV LFGFQDAVNE VLRNHNKIPH WMFALDSIIR KAVQTAITIL VPELRPHFSL ASESADTADQE<br/> DLDVEDDHEEQPSNQTVRRPQAVIEDAVATSGVSTLSTVSHDSQSAHRS LNVQLGRMKI ETNRLLLELV<br/> RKEKELQALLHRAIEEKDQEI KHLKLSQP IEIPELVPFH LNSSGTNTED SELTDWLRVNGADEDTISRFLAEDYTLTLDVLYYVTRDDLKCLRRLRGGMLCTLWKAIDFRNKQT</p> <p><b>Notes</b><br/> H<sub>2</sub>O<sub>2</sub> triggers dephosphorylation of Ser967 resulting in dissociation of the ASK1-14-3-3 complex with concomitant increase of ASK1 catalytic activity and ASK1-mediated activation of JNK and p38 pathways.<br/> The N-terminus of ASK1-interacting protein (AIP1) (Ras GTPase-activating protein) containing the C2 and GAP domains constitutively binds to ASK1 and facilitates the release of 14-3-3 from ASK1.<br/> Antioxidants EUK8 and N-acetyl cysteine significantly decreased apoptosis by inhibiting the ASK1 dephosphorylation at Ser(967) (= Ser966 in Q99683) and subsequently increased the interaction of ASK1 with thioredoxin or 14-3-3 proteins (Kuo et al 2007).</p> <p><b>References to 14-3-3 binding to ASK1</b><br/> Kuo PL, Chen CY, Hsu YL. Isoobtusilactone A induces cell cycle arrest and apoptosis through reactive oxygen species/apoptosis signal-regulating kinase 1 signaling pathway in human breast cancer cells. <i>Cancer Res.</i> 2007 Aug 1;67(15):7406-20.<br/> Hsieh CC, Papaconstantinou J. Thioredoxin-ASK1 complex levels regulate ROS-mediated p38 MAPK pathway activity in livers of aged and long-lived Snell dwarf mice. <i>FASEB J</i> 2006;20:259-68.<br/> Goldman EH, Chen L, Fu H. Activation of apoptosis signal-regulating kinase 1 by reactive oxygen species through dephosphorylation at serine 967 and 14-3-3 dissociation. <i>J Biol Chem</i> 2004;279:10442-9.<br/> Yingmei Liu, Guoyong Yin, James Surapitschat, Bradford C. Berk, and Wang Min (2001) Laminar flow inhibits TNF-induced ASK1 activation by preventing dissociation of ASK1 from its inhibitor 14-3-3. <i>J Clin Invest.</i> 2001 April 1; 107(7): 917-923.<br/> Zhang R, He X, Liu W, Lu M, Hsieh JT, Min W (2003) AIP1 mediates TNF-alpha-induced ASK1 activation by facilitating dissociation of ASK1 from its inhibitor 14-3-3. <i>J Clin Invest.</i> 2003 Jun; 111(12):1933-43.<br/> Yu CC, Hsu MJ, Kuo ML, Chen RF, Chen MC, Bai KJ, Yu MC, Chen BC, Lin CH. Thrombin-induced connective tissue growth factor expression in human lung fibroblasts requires the ASK1/JNK/AP-1 pathway. <i>J Immunol.</i> 2009 Jun 15; 182(12):7916-27.<br/> Lee JA, Park JE, Lee DH, Park SG, Myung PK, Park BC, Cho S. G1 to S phase transition protein 1 induces apoptosis signal-regulating kinase 1 activation by dissociating 14-3-3 from ASK1. <i>Oncogene.</i> 2008 Feb 21; 27(9):1297-305.<br/> Liu Y, Yin G, Surapitschat J, Berk BC, Min W. Laminar flow inhibits TNF-induced ASK1 activation by preventing dissociation of ASK1 from its inhibitor 14-3-3. <i>J Clin Invest.</i> 2001 Apr; 107(7):917-23.<br/> Jung H, Seong HA, Manoharan R, Ha H. Serine-threonine kinase receptor-associated protein (STRAP) inhibits apoptosis signal-regulating kinase 1 function through direct interaction. <i>J Biol Chem.</i> 2009 Oct 30. [Epub ahead of print]<br/> Cockrell LM, Puckett MC, Goldman EH, Khuri FR, Fu H. Dual engagement of 14-3-3 proteins controls signal relay from ASK2 to the ASK1 signalosome. <i>Oncogene.</i> 2009 Nov 23. [Epub ahead of print]<br/> Seong HA, Jung H, Ichijo H, Ha H. Reciprocal negative regulation of 3-phosphoinositide-dependent protein kinase-1 (PDK1) and apoptosis signal-regulating kinase 1 (ASK1) signaling by direct interaction and phosphorylation. <i>J Biol Chem.</i> 2009 Nov 17. [Epub ahead of print]</p> | <p><b>Human MAP3K6</b> (ASK2, MAPKKK6, MEKK6) Apoptosis signal-regulating kinase 2 (Swissprot = O95382)</p> |
|-----------------------------------------------------------------------------------------------------------------------------------------------------------------------------------------------------------------------------------------------------------------------------------------------------------------------------------------------------------------------------------------------------------------------------------------------------------------------------------------------------------------------------------------------------------------------------------------------------------------------------------------------------------------------------------------------------------------------------------------------------------------------------------------------------------------------------------------------------------------------------------------------------------------------------------------------------------------------------------------------------------------------------------------------------------------------------------------------------------------------------------------------------------------------------------------------------------------------------------------------------------------------------------------------------------------------------------------------------------------------------------------------------------------------------------------------------------------------------------------------------------------------------------------------------------------------------------------------------------------------------------------------------------------------------------------------------------------------------------------------------------------------------------------------------------------------------------------------------------------------------------------------------------------------------------------------------------------------------------------------------------------------------------------------------------------------------------------------------------------------------------------------------------------------------------------------------------------------------------------------------------------------------------------------------------------------------------------------------------------------------------------------------------------------------------------------------------------------------------------------------------------------------------------------------------------------------------------------------------------------------------------------------------------------------------------------------------------------------------------------------------------------------------------------------------------------------------------------------------------------------------------------------------------------------------------------------------------------------------------------------------------------------------------------------------------------------------------------------------------------------------------------------------------------------------------------------------------------------------------------------------------------------------------------------------------------------------------------------------------------------------------------------------------------------------------------------------------------------------------------------------------------------------------------------------------------------------------------------------------------------------------------------------------------------------------------------------------------------------------------------------------------------------------------------------------------------------------------------------------------------------------------------------------------------------------------------------------------------------------------------------------------------------------------------------------------------------------------------------------------------------------------------------------------------------------------------------------------------------------------------------------------------------------------------------------------------------------------------------------------------------------------------------------------------------------------------------------------------------------------------------------------------------------------------------------------------------------------------------------------------------------------------------------------------------------------------------------------------------------------------------------------------------------------------------------------------------------------------------------------------------------------------------------------------------------------------------------------------------------------------------------------------------------------------------------------------------------------------------------------------------------------------------------------------------------------------------------------------------------------------------------------------------------------------------------------------------------------------------------------------------------------------------------------------------------------------------------------------------------------------------------------------------------------------------------------------------------------------------------------------------------------------------------------------------------------------------------------------------------------------------------------------------------------------------------------------------------------------------------------------------------------------------------------------------------------------------------------------------------------------------------------------------------------------------------------------------------------------------------------------------------------------------------------------------------------------------------------------------------------------------------------------------------------------------------------------------------|-------------------------------------------------------------------------------------------------------------|

1 MAGPCPRSGA ERAGSCWQDP LAVALSRGRQ LAAPPGRGCA RSRPLSVVYV LTREPQPGLE  
61 PREGTEAEPL PLRLCREACA QVPRRPPPPQ LRSPLPFGTLE LGDTAALDAF YNADVVVLEV  
121 SSSLVQPSLF YHLGVRESFS MTNNVLLCSQ ADLPDLQALR EDVFNKNSD VGSYTLIPYV  
181 VTATGRVLCG DAGLLRGLAD GLVQAGVGTLE ALLTPLVGRL ARLEATPTD SCGYFRETI  
241 RDIRQARERF SGPQLRQELA RLQRRLDSVE LLSFDIIMNL LLSYRDVQDY SAIIELVETL  
301 QALPTCDVAE QHNVCFHYYTF ALNRNRNRPD RAKALSLLLP LVQLEGSVAP DLYCMCGRIY  
361 KDMFSSGFG DAGHREQAYH WYRKAFDVEP SLHSGINAAV LLIAAGQHFE DSKELRIGM  
421 KLGCLLARKG CVEKMQYYWD VGFYLGAQIL ANDPTQVVLA AEQLYKLNAE IWYLVSMET  
481 FLLYQHFRPT PEPPGGPPRR AHFWLHFLQ SCQFFKTACA QGDQCLVVLV EMNKVLLPAK  
541 LEVRGTDVPS TVTSLLEPE TQDIPSSWTF PVASICGVA SKRDERCCFL YALPPAQDVQ  
601 LCFPSVGHCC WFCGLIQAVW TNPSTAPAE EAEGAGEMLE FDYETETGE RLVLGKGTYG  
661 VVYAGRDRHT RVRIAIKEIP ERDSRFSQPL HEEIALHRRR RHKNIVRYLG SASQGGYLKI  
721 FMEEVPGGSL SLLRSVWGP LKDNSTISF YTRQILQGLG YLHDNHIVHR DIKGDNVLIN  
781 TFSGLLKISD FGTSKRLAGI TPCFTFTGT LQYMAPEIID QGPRGYKAA DIWSLGTVI  
841 EMATGRPPP ELGSPQAMF QVGMKVHPP MPSSLSAEA AFLLRTEFD PRLRASAQTL  
901 LGDFLQPGK RSRSPSPRH APRSDAPSA SPTPSANSTT SQQTFPCQA PSQHPPSPPK  
961 RCLSYGGTSQ LRVPEEPAE EPASPEESSG LSLHQESKR RAMLAQVLEQ ELPALAEHL  
1021 QEQQEQGAR LGRNHVEELL RCLGAHIHTP NRRQLAQELR ALQGRRLAQQ LGPALLHRPL  
1081 FAFPDVAVKI LRRKQIRPHW MFVLDLSLR AVRAALGVLG PEVEKEAVSP RSEELSNED  
1141 SQQSPGQQSP LPVEPEQGA PLMWQLSLR AETDRLEIL AGKEREYQAL VQRALQRLNE  
1201 EARTYVLAPE PPTALSTDQG LVQWLQELNV DSGTIQMLLN HSFTLHTLLT YATRDDLIYT  
1261 RIRGGMVCR IWRILAQRAG STPVTSGP

**Notes**  
"We show that ASK2 specifically interacts with 14-3-3 proteins through phosphorylated S964. Although a 14-3-3-binding defective mutant of ASK1 (S967A) has no effect on the ASK2/14-3-3 interaction, both overexpression of the analogous ASK2 (S964A) mutant and knockdown of ASK2 dramatically reduced the amount of ASK1 complexed with 14-3-3. These data suggest a dominant role of ASK2 in 14-3-3 control of ASK1 function. Indeed, ASK2 S964A-induced dissociation of 14-3-3 from ASK1 correlated with enhanced phosphorylation of ASK1 at T838 and increased c-Jun N-terminal kinase phosphorylation, the two biological readouts of ASK1 activation. Our results suggest a model in which upstream signals couple ASK2 S964 phosphorylation to the ASK1 signalosome through dual engagement of 14-3-3." (Cockrell et al 2009 prepublication date).

**References to 14-3-3 binding to ASK2**

Cockrell LM, Puckett MC, Goldman EH, Khuri FR, Fu H. Dual engagement of 14-3-3 proteins controls signal relay from ASK2 to the ASK1 signalosome. *Oncogene*. 2009 Nov 23. [Epub ahead of print]

**Human MAPK7 (ERK5, BMK1)** (Swissprot = Q13164)

1 MAEPLKEEDG EDGSAEPPGP VKAEPHAATA SVAAKNLALL KARSFDVTFD VGDEYEI IET  
61 IINGAYGVV SARRRLTGQQ VAIKIPNAF DVVNAKRTL RELKILKHF HDNIIAIKDI  
121 LRPTVPYGEF KSVVVLDDLM ESDLHQI IHS SQPLTLEHVR YFLYQLRGL KYMMSAQVIH  
181 RDLKPSNLLV NENCLKIGD FGMARGLCTS PAEHQYFMT EYVATRWRAP ELMLSLHEYT  
241 QAIDLWSVGC IFGEMLARQ LFPKNYVHQ LQLIMMVLGT PSPAVIQAVG AERVRAIQS  
301 LPPRQVPVWE TVYPGADRQA LSLGRMLRF EPSARISAAA ALRHPFLAKY HDPDDEPDCA  
361 PPFDFAFDRE ALTRERIKEA IVAEIEDFHA RREGIRQQIR FQPSLQPVAS EPGCPDVEMP  
421 SPWAPSGDCA MESPPPAPP CPGPADTID LTLQPPPPV EPAPPKKDG A ISDNTKAALK  
481 AALLKSLRSR LRDGPSAPLE APEPRKPVTA QERQREREK RRRRQERAKE REKRRQERER  
541 KERKAGASG PSTDPLAGLV LSDNDRSLE RWTRMARPAA PALTSVPAPA PAPTPTPTPV  
601 QPTSPPPGPV AQPTGPPQPS AGSTSGPVPQ PACPPGPAP HPTGPPGPIP VPAPPQIATS  
661 TSLLAQSLV PPPGLPGSST PGVLPYFPPG LPPPDAGGAP QSSMSESPDV NLVTQQLSLS  
721 QVEDPLPPV SGTPKGSGAG YGVGFDEEF LNQSFDMGVA DGPQDGQADS ASLSASLLAD  
781 WLEGHMNPA DIESLQREIQ MDSMPLLADL PDLQDP

>gi|205371766|sp|Q13164.2|MK07 HUMAN RecName: Full=Mitogen-activated protein kinase 7; AltName: Full=Extracellular signal-regulated kinase 5; Short=ERK-5; AltName: Full=ERK4; AltName: Full=Big MAP kinase 1; Short=BMK1 kinase  
MAEPLKEEDGEDGSAEPPGPVKAEPHAATA SVAAKNLALLKARSFDVTFDVGDEYEI IETIGNGAYGVV SARRRLTGQQVAIKIPNAFDVVNAKRTLRELKILKHFHDNIIAIKDI LRPTVPYGEF KSVVVLDDLM ESDLHQI IHS SQPLTLEHVR YFLYQLRGL KYMMSAQVIH RDLKPSNLLV NENCLKIGD FGMARGLCTS PAEHQYFMT EYVATRWRAP ELMLSLHEYT QAIDLWSVGC IFGEMLARQL FPKNYVHQLQLIMMVLGT PSPAVIQAVG AERVRAIQS LPPRQVPVWE TVYPGADRQA LSLGRMLRF EPSARISAAA ALRHPFLAKY HDPDDEPDCA PPFDFAFDREALTRERIKEA IVAEIEDFHARREGIRQQIR FQPSLQPVASEPGCPDVEMP SPWAPSGDCAMESPPPAPP CPGPADTID LTLQPPPPV SEPAPPKKDG A ISDNTKAALK AALLKSLRSR LRDGPSAPLEAPEPRKPVTAQERQREREKRRRRQERAKEREKRRRQERKERKAGASGGPSTDPLAGLV LSDNDRSLLERWTRMARPAA PALTSVPAPA PAPTPTPTPVQPTSPPPGPV AQPTGPPQPS AGSTSGPVPQ PACPPGPAP HPTGPPGPIP VPAPPQIATS TSLLAQSLV PPPGLPGSST PGVLPYFPPG LPPPDAGGAP QSSMSESPDV NLVTQQLSLS QVEDPLPPV SGTPKGSGAG YGVGFDEEF LNQSFDMGVA DGPQDGQADS ASLSASLLAD WLEGHMNPADIESLQREIQ MDSMPLLADL PDLQDP

**Notes**  
Big mitogen-activated kinase 1 (BMK1/ERK5) is a member of the MAPK family activated by growth factors that mediates cell growth and survival. Previous data show that BMK1 can be activated by steady laminar flow and is atheroprotective by preventing endothelial cells from undergoing apoptosis. Mutation of serine 486 (BMK1-S486A) prevented the interaction with 14-3-3beta and enhanced BMK1 activity upon epidermal growth factor stimulation. 14-3-3beta binding to BMK1 has an inhibitory function. 14-3-3beta binds to big mitogen-activated protein kinase 1 (BMK1/ERK5) and regulates BMK1 function.

**References to 14-3-3 binding to MAPK7**

Zheng Q, Yin G, Yan C, Cavet M, Berk BC. 14-3-3beta binds to big mitogen-activated protein kinase 1 (BMK1/ERK5) and regulates BMK1 function. *J Biol Chem*. 2004 Mar 5;279(10):8787-91.

**Human MAP1** Microtubule-associated protein tau) (Swissprot =P10636)

1 MAEPRQEFV MEDHAGTYGL GDRKDQGGYT MHQDQEGDTD AGLKESPLQT PTEGDSSEEPG

THREE SITES IMPLICATED IN 14-

|                                                                                                                                                                                                                                                                                                                                                                                                                                                                                                                                                                                                                                                                                                                                                                                                                                                                                                                                                                                                                                                                                                                                                                                                                                                                                                                                                                                                                                                                                                                                                                                                                                                                                                                                                                                                                                                                                                                                                                                                                                                                                                                                                                                                                                                                                                                                                                                                                                                                                                                                                                                                                                                                                                                                                                                                                                                                                                                                                                                                                                                                                                                                                                                                                                                                                                                                                                                                                                                                                                                                                                                                                                                                                                                                                                                                                                                                                                                                                                                                                                                                                                                                                                                                                          |                                                                                                                                                                                                                                                                                                                                                   |
|--------------------------------------------------------------------------------------------------------------------------------------------------------------------------------------------------------------------------------------------------------------------------------------------------------------------------------------------------------------------------------------------------------------------------------------------------------------------------------------------------------------------------------------------------------------------------------------------------------------------------------------------------------------------------------------------------------------------------------------------------------------------------------------------------------------------------------------------------------------------------------------------------------------------------------------------------------------------------------------------------------------------------------------------------------------------------------------------------------------------------------------------------------------------------------------------------------------------------------------------------------------------------------------------------------------------------------------------------------------------------------------------------------------------------------------------------------------------------------------------------------------------------------------------------------------------------------------------------------------------------------------------------------------------------------------------------------------------------------------------------------------------------------------------------------------------------------------------------------------------------------------------------------------------------------------------------------------------------------------------------------------------------------------------------------------------------------------------------------------------------------------------------------------------------------------------------------------------------------------------------------------------------------------------------------------------------------------------------------------------------------------------------------------------------------------------------------------------------------------------------------------------------------------------------------------------------------------------------------------------------------------------------------------------------------------------------------------------------------------------------------------------------------------------------------------------------------------------------------------------------------------------------------------------------------------------------------------------------------------------------------------------------------------------------------------------------------------------------------------------------------------------------------------------------------------------------------------------------------------------------------------------------------------------------------------------------------------------------------------------------------------------------------------------------------------------------------------------------------------------------------------------------------------------------------------------------------------------------------------------------------------------------------------------------------------------------------------------------------------------------------------------------------------------------------------------------------------------------------------------------------------------------------------------------------------------------------------------------------------------------------------------------------------------------------------------------------------------------------------------------------------------------------------------------------------------------------------------------|---------------------------------------------------------------------------------------------------------------------------------------------------------------------------------------------------------------------------------------------------------------------------------------------------------------------------------------------------|
| <pre> 61 SETSDAKSTP TAEDVTAPLV DEGAPGKQAA AQPHTEIP EG TTAEEAGIGD TPSLEDEAAG 121 HVTQEPESGK VVQEGFLREP GPPGLSHQLM SGMFGAPLLP EGPREATRQP SGTGPEDETEG 181 GRHAPPELLKH QLLGDLHQEG PPLKGAGGKE RPKSKEEVE DRDVESSPQ DSPPSKASPA 241 QDGRPPQTAA REATSIPGFP AEGAIPLVD FLSKVSTEIP ASEPDGSPVG RAKGQDAPLE 301 FTFHVEITPN VQKEQAHSEE HLGRAAFPGA PGGPEARGP SLGEDTKREAD LPEPSEKQPA 361 AAPRGKPVSR VPQLKARMVS KSKDGTGSD KAKTSTRSS AKTLKNRCL SPKLPPTGSS 421 DPLIQPSSPA VCPEPPSSPK HVSSVTSRTG SSGAKEMKLGADGKTIAT PRGAAPPQK 481 QGANATRIPA KTPPAPKTPP SSGEPPKSGD RSGYSSPGSP GTPGSRSRTP LPTPTREP 541 KKVAVVRTTP KSPSAKSRL QTAPVMPDL KNVKSKIGST ENLKHQPGGG KVIINKKLD 601 LSNVQSKCGS KDNKIHVPGG GSVQIVYKPV DLSKVTSKCG LGNIHHKPG GGQVEVKSEK 661 LDFKDRVQSK IGLDNITHV PGGGNKKIET HCLTFRENAK AKTDHGAEIV YKSPVSGDT 721 SPRHLSNVSS TGSIDMVDSF QLATLADEVS ASLAKQGL &gt;gi 13124806 sp P10636.4 TAU_HUMAN RecName: Full=Microtubule-associated protein tau; AltName: Full=Neurofibrillary tangle protein; AltName: Full=Paired helical filament-tau; Short=PHF-tau MAEPRQEFVEMDHAGTYGLGDRKDGQGGYTMHQDQEGD TDAGLKE SPLQTPTE DGSSEEPGSETSDAKSTP TAEDVTAPLVDEGAPGKQAAAQPHTEIP EGTTAAEEAGIGDTPSLEDEAAGHVTQEPESGKVVQEGFLREP GPPGLSHQLMSGMPGAPLLPEGPREATRQPSGTGPEDETEGGRHAPPELLKHQLLGDH HQEGPPLKGAGGKE RPGSKEEVEDR DVESSPQDSPPSKASPAQDGRPPQTAAAREATSIPGFPAEGAIPLVDFLSKVSTEIP ASEPDGSPVGRAKQGDAPLETFHVEITPNVQKEQAHSEHLGRAAFP GAGPEARGPSLGEDTKREAD LPEPSEKQPAAPRGKPVSRVPQLKARMVSKSKDGTGSDKAKTSTRSSAKTLKNRCLSPKLPPTGSS DPLIQPSSPAVCPEPPSSPKHVSSVTSRTGSSGAKEMKLGADGKTIATPRGAAPPQKQGANATRIPA KTPPAPKTPPSSGEPPKSGDRSGYSSPGSPGTPGSRSRTPSLPTPTREP KKVAVVRTTPPKSPSAKSRL QTAPVMPDLKNVKSKIGSTENLKHQPGGGKVIINKKLDLSNVQSKCGS KDNKIHVPGGGSVQIVYKPV DLSKVTSKCGSLGNIHHKPGGGQVEVKSEKLDKDRVQSKIGSLDNITHV PGGGNKKIETHKLTFR ENAKAKTDHG AKTDHGAEIVKSPVSGDTSRHLNSVSS TGSIDMVDSF QLATLADEVSASLAKQGL Notes Six isoforms of human tau generated by alternate splicing, of which tau 3 (P10636-2) is the shortest. This is the sequence sent by Nikolai B. Gusev. He says "We were working with the shortest isoform of human tau protein (SwissProt #P10636-2), fetal-tau isoform. The sites that were mutated and/or phosphorylated by cAMP- dependent protein kinase and that seem to be important for interaction with 14-3-3 are Ser156, Ser 235 and Ser 267. I am sending you the primary structure of this isoform with phosphorylation sites marked in red as an attachment." MAEPRQEFVEMDHAGTYGL GDRKDGQGGY TMHQDQEGD TDAGLKEEAGI GDTPSLEDEA AGHVTQARMV KSKDGTGSD DKKAKGADGK TKIATPRGAA PPGKQKQANA TRIPAKTPPA PKTPPSSGEP KKSQDRSGYS SPGSPGTGGS RSRTPLPT PTREP KKVAV VRTPPKSPSS AKSRLQTAPV PMPDLKNVKS KIGSTENLKH QPGGGKQIV YKPV DLSKVT SKCGSLGNIH HKPGGGQVEV KSEKLDKDR VQSKIGSLDN ITHV PGGGNK KIETHKLTFR ENAKAKTDHG AEIVYKSPVV SGTSPRHLNSVSS TGSIDM VDSPQLATLA DEVSASLAKQ GL As the phosphorylation at Ser214 is up-regulated in fetal brain, tau's interaction with 14-3-3 may have a significant role in the organization of the microtubule cytoskeleton in development. Also as the phosphorylation at Ser214 is up-regulated in Alzheimer's disease brain, tau's interaction with 14-3-3 might be involved in the pathology of this disease. References to 14-3-3 binding to Tau Chun J, Kwon T, Lee EJ, Kim CH, Han YS, Hong SK, Hyun S, Kang SS. 14-3-3 Protein mediates phosphorylation of microtubule-associated protein tau by serum- and glucocorticoid-induced protein kinase 1. Mol Cells. 2004 Dec 31;18(3):360-8 Sadik G, Tanaka T, Kato K, Yanagi K, Kudo T, Takeda M. Phosphorylation of tau at Ser214 mediates its interaction with 14-3-3 protein: implications for the mechanism of tau aggregation. J Neurochem. 2009 Jan;108(1):33-43 Sluchanko NN, Seit-Nebi AS, Gusev NB. Effect of phosphorylation on interaction of human tau protein with 14-3- 3zeta. Biochem Biophys Res Commun. 2009 Feb 20;379(4):990-4. Epub 2009 Jan 10. Sluchanko NN, Seit-Nebi AS, Gusev NB. Phosphorylation of more than one site is required for tight interaction of human tau protein with 14-3-3zeta. FEBS Lett. 2009 Aug 1. [Epub ahead of print] Serine residues phosphorylated by protein kinase A (PKA) in the shortest isoform of human tau protein (tau3) </pre> | <p>3-3-BINDING, BUT THE SECOND TWO SHARE SEQUENCE SIMILARITIES (AS SEEN IN SUPPLEMENTARY TABLE 2). WE THEREFORE MADE THE ARBITRARY CHOICE TO INCLUDE SER156 AND SER235 IN WEBLOGO ANALYSIS, AND SUGGEST THAT FURTHER EXPERIMENTAL DISSECTION OF WHETHER ONE OR OTHER OR BOTH OF THE SER235 AND SER267 SITES IS RELEVANT WOULD BE INTERESTING.</p> |
| <pre> Human MARK2 (aka Par-1b/EMK) (Swissprot = Q7KZI7) 1 MSSARTPLPT LNERDTEQPT LGHLDSKPS KSNMIRGRNS ATSADEQPHI GNYRLLKTIG 61 KGNFAKVKLA RHILTGKEVA VKIDKTQLN SSSLQKLFRE VRIMKVLNHP NIVKLFIEVIE 121 TEKTLYLVM EYASGGEVFDY LVAHGRMKEK EARAQFRQIV SAVQYCHQKF IVHRDLKAEN 181 LLLDADMNIK IADFGFSNEF TFGNKLDTF GSPFYAAPL FQGGKYDGE VDWVSLGVIL 241 YTLVSGSLPF DGQNLKELRE RVLRGKYRIP FYMSTDCENL LKKFLILNPS KRGTLQIMK 301 DRWMNVGHED DELKPYVEPL PDYKDRRTE LMVSMGYTRE EIQDSLQVQR YNEVMATYLL 361 LGYKSSELEG DTITLKP RPS ADLTNSSAPS PSHKVQRSV ANPKQRRFSD QAAGPAIPTS 421 NSYSKKTQSN NAENKRPEED RESGRKASST AKVPASPLFG LERKKTTPST STNSVLSTST 481 NRSRNSPLLE RASLGQASIQ NGKDSLTPMG SRASASASA AVSAAARPRQH QKSMSASVHP 541 NKASGLPPE SNCEVPRPST APQRVPVASP SAHNISSSGG APDRTNFRPG VSSRSFHAG 601 QLRQVRDQQN LPYGVTPASP SGHSQGRRA SGSIFSFKTS KFVRRNLSFR FARRNLNEPE 661 SKDRVETLRP HVVSGGNDK EKEEFREAKP RSLRFTWSMK TSSMEPNEM MREIRKVLDA 721 NSCQSELHEK YMLLCMHGTP GHEDFVQWEM EVCKLPRLSL NGVRFKRISG TSMAFKNIAS 781 KIANELKL &gt;gi 62510922 sp Q7KZI7.2 MARK2_HUMAN RecName: Full=Serine/threonine-protein kinase MARK2; AltName: Full=MAF/microtubule affinity-regulating kinase 2; AltName: Full=ELKL motif kinase; AltName: Full=EMK1; AltName: Full=PAR1 homolog MSSARTPLPTLNERDTEQPTLGHLDSKPSKSNMIRGRNSATSADEQPHIGNYRLLKTIGKGNFAKVKLA RHILTGKEVAVKIDKTQLNSSLQKLFREVRIMKVLNHPNIVKLFIEVIE TEKTLYLVM EYASGGEVFDY </pre>                                                                                                                                                                                                                                                                                                                                                                                                                                                                                                                                                                                                                                                                                                                                                                                                                                                                                                                                                                                                                                                                                                                                                                                                                                                                                                                                                                                                                                                                                                                                                                                                                                                                                                                                                                                                                                                                                                                                                                                                                                                                                                                                                                                                                                                                                                                                                                                                                                                                                                                                                                                                                                                                                                                                                                                                                       |                                                                                                                                                                                                                                                                                                                                                   |

|                                                                                                                                                                                                                                                                                                                                                                                                                                                                                                                                                                                                                                                                                                                                                                                                                                                                                                                                                                                                                                                                                                                                                                                                                                                                                                                                                                                                                                                                                                                                                                                                                                                                                                                                                                                                                                                                                                                                                                                                                                                                                                                                                                                                                                                                                                                                                |  |
|------------------------------------------------------------------------------------------------------------------------------------------------------------------------------------------------------------------------------------------------------------------------------------------------------------------------------------------------------------------------------------------------------------------------------------------------------------------------------------------------------------------------------------------------------------------------------------------------------------------------------------------------------------------------------------------------------------------------------------------------------------------------------------------------------------------------------------------------------------------------------------------------------------------------------------------------------------------------------------------------------------------------------------------------------------------------------------------------------------------------------------------------------------------------------------------------------------------------------------------------------------------------------------------------------------------------------------------------------------------------------------------------------------------------------------------------------------------------------------------------------------------------------------------------------------------------------------------------------------------------------------------------------------------------------------------------------------------------------------------------------------------------------------------------------------------------------------------------------------------------------------------------------------------------------------------------------------------------------------------------------------------------------------------------------------------------------------------------------------------------------------------------------------------------------------------------------------------------------------------------------------------------------------------------------------------------------------------------|--|
| <p>LVAHGRMKEKEARAKFRQIVSAVQYCHQKFI VHRDLKAENLLLDADMNKIADFGFSNEFTFGNKLDTFC<br/>GSPPYAAPELFGQKKYDGPVVDVWSLGVILYTLVSGSLPFDGQNLKELRERVLRGKYRIPFYMSTDCENL<br/>LKKFLILNPSKRGTLLEQIMKDRWMNVGHEDDELDKPYVEPLPDYKDRRTELMVSMGYTREEIQDSLVGQR<br/>YNEVMATYLLLYGKSELEGGDTITLKRPSADLTNSSAPSPSHKVQRSVSNPKQRRFSDQAAGPAIPT<br/>NSYSKKTQSNNAENKRPEEDRESGRKASSTAKVPASPLPGLERKKTPTPTSTNSVLSTSTNRSRNSPLLE<br/>RASLQASIQNGKDSLTPMGSRASTASASAASAAARPRQHQSMSASVHPNKASGLPPTESNCEVPRPST<br/>APQRVVPVSPSAHNISSSGAPDRTNFPRGVSSRSTFHAGQLRQVRDQNLPGYVTPASPSGHSQGRRGA<br/>SGSIFSKFTSKFVRRNLSFRFARRNLNEPEKDRVETLRPHVVGSGGNDKEKEEFREAKPRSLRFTWSMK<br/>TTSMEPNEMMREIRKVLDA NSCQSELHEKYMLLCMHGTPGHEDFVQWEMEVCKLPRLSLNGVRFKRISG<br/>TSMAFKNIASKIANELKL</p> <p><b>Notes</b><br/>Phosphorylation of human Par1b is mediated by PKCs at Ser400 (not sure but think it is RSVsANP) and Thr595 (SRStFHAGQ). Thr595 is conserved. Serine 400 (S400) is conserved in all 4 mammalian Par-1 kinases as well as the fly ortholog. 2 arms of the PKC pathway regulate interactions between Par-1b and 14-3-3 proteins: one involving aPKC and the other nPKC/PKD.</p> <p><b>References to 14-3-3 binding to MARK2</b><br/>Lin J, Hou KK, Piwnica-Worms H, Shaw AS. The polarity protein Par1b/EMK/MARK2 regulates T cell receptor-induced microtubule-organizing center polarization. <i>J Immunol.</i> 2009 Jul 15;183(2):1215-21.<br/>Watkins JL, Lewandowski KT, Meek SE, Storz P, Tokar A, Piwnica-Worms H. Phosphorylation of the Par-1 polarity kinase by protein kinase D regulates 14-3-3 binding and membrane association. <i>Proc Natl Acad Sci U S A.</i> 2008 Nov 25;105(47):18378-83.</p>                                                                                                                                                                                                                                                                                                                                                                                                                                                                                                                                                                                                                                                                                        |  |
| <p><b>Human Mdm2</b> (Swissprot = Q00987)</p> <p>1 MCNTNMSVPT DGAVTTSQIP ASEQETLVRP KPLLLKLLKS VQAQKDTYTM KEVLFYLGQY<br/>61 IMTKRLYDEK QQHIVYCSND LLGDLFGVPS FSVKEHRKIY TMIYRNLVVV NQQESSDSGT<br/>121 SVSENRCHE GGSQKDLVQ ELQEEKPSS HLVS RPSTSS RRRAISETEE NSDELSGERQ<br/>181 RKRHSDSIS LSFDESALC VIREICCERS SSESSTGTPS NPDLDAGVSE HSGDWLDQDS<br/>241 VSDQFSVEFE VESLDSSEDYS LSEEGQELSD EDDEVYQVTV YQAGESDTS FEEDPEISLA<br/>301 DYWKCTSCNE MNPLP SHCN RCWALRENWL PEDK GKDKGE ISEKAKLENS TQAEEGFDVP<br/>361 DCKKTI VVND RESCVEEND KITQASQSQE SEDYSQPSTS SSIYSSQED VKEFEREETQ<br/>421 DKEESVSSL PLNAIEPCVI CQGRPKNGCI VHGTGHLMA CFTCAKLLK R NKPCVCRQ<br/>481 PIQMI VLYTF P</p> <p>&gt;gi 266516 sp Q00987.1 MDM2_HUMAN RecName: Full=E3 ubiquitin-protein ligase Mdm2; AltName: Full=p53-binding protein Mdm2; AltName: Full=Oncoprotein Mdm2; AltName: Full=Double minute 2 protein; AltName: Full=Hdm2</p> <p>MCNTNMSVPTDGAVTTSQIPASEQETLVRPKPLLLKLLKS VQAQKDTYTMKEVLFYLGQYIMTKRLYDEK<br/>QQHIVYCSNDLLGDLFGVPSFSVKEHRKIY TMIYRNLVVV NQQESSDSGTSVSENRCHEGGSDQKDLVQ<br/>ELQEEKPSSSHLVS RPSTSSRRRAISETEENSDELSGERQRKRHKS DSISLSFDESALC VIREICCERS<br/>SSESSTGTPSNPDLDAGVSEHSGDWLDQDSVSDQFSVEFEVESLDSSEDYS LSEEGQELSDDEDEVYQVTV<br/>YQAGESDTS FEEDPEISLADYWKCTSCNEMNPLP SHCNRCWALRENWL PEDK GKDKGE ISEKAKLENS<br/>TQAEEGFDVPDCKKTI VVNDRESCEVEENDKITQASQSQE SEDYSQPSTS SSIYSSQEDVKEFEREETQ<br/>DKEESVSSLPLNAIEPCVICQGRPKNGCIVHGTGHLMACTCAKLLKRNKPCVCRQPIQMI VLYTF<br/>P</p> <p><b>Notes</b><br/>14-3-3 proteins bind to Pim kinase-phosphorylated Ser166 and Ser186 on the human E3 ubiquitin ligase mouse double minute 2 (Mdm2), but not protein kinase B (PKB)/Akt-phosphorylated Ser166 and Ser188 (Wood et al 2009). In addition, 14-3-3sigma is reported to bind to the C-terminal RING domain of mdm2, but the precise sites have not been defined (Yang et al 2007).</p> <p><b>References to 14-3-3 binding to Mdm2</b><br/>Wood NT, Meek DW, MacKintosh C. 14-3-3 Binding to Pim-phosphorylated Ser166 and Ser186 of human Mdm2-Potential interplay with the PKB/Akt pathway and p14(ARF). <i>FEBS Lett.</i> 2009 Feb 18;583(4):615-20.<br/>Yang HY, Wen YY, Lin YI, Pham L, Su CH, Yang H, Chen J, Lee MH. Roles for negative cell regulator 14-3-3sigma in control of MDM2 activities. <i>Oncogene.</i> 2007 Nov 15;26(52):7355-62.</p> |  |
| <p><b>Human Mdm4 (MdmX)</b> (Swissprot = O15151)</p> <p>1 MTSFSTSAQC STSDSACRIS PGQINQVRPK LPLLKILHAA GAQGEMFTVK EVMHYLGQYI<br/>61 MVKQLYDQOE QHMVYCGGDL LGELLGRQSF SVKDPSPLYD MLRKNLVTLA TATDDAAQTL<br/>121 ALAQDHSM DI PSQDQLKQSA EESSTSRKRT TEDDIPTLPT SEHKCIHSRE DEDLIENLAQ<br/>181 DETSRLDLGF EEWVAGLPW WFLGNLRSNY TPRSNGSTD LQTNQDVGTAI VSDTTDDLWF<br/>241 LNESVSEQLG VGIKVEAADT EQTSEEVGKV SDKKVIEVGK NDDLEDSKSL SDDTDVEVTS<br/>301 EDEWQCTECK KFNSPSKRYC FRCWALRKDW YSDCSKLTHS LSTSDITAIP EKENE GNDVP<br/>361 DCRRTI SAPV VRPKDAYIKK ENSKLFDP CN SVEFLDLAHS SESQETISSM GEQLDNLSEQ<br/>421 RDTTENMEDC QNLLKPCSLC EKRPRDGNII HGRTGHLVTC FHCARRLKA GASCPICKKE<br/>481 IQLVIKVFIA</p> <p>&gt;gi 76803799 sp O15151.2 MDM4_HUMAN RecName: Full=Protein Mdm4; AltName: Full=p53-binding protein Mdm4; AltName: Full=Mdm2-like p53-binding protein; AltName: Full=Protein Mdmx; AltName: Full=Double minute 4 protein</p> <p>MTSFSTSAQCSTSDSACRISPGQINQVRPKLPLLKILHAAGA QGEMFTVKEVMHYLGQYIMVKQLYDQOE<br/>QHMVYCGGDL LGELLGRQSF SVKDPSPLYDMLRKNLVTLATATDDAAQTLALAQDHSM DI PSQDQLKQSA<br/>EESSTSRKRTTEDDIPTLPTSEHKCIHSREDEDLIENLAQDETSRLDLGFEEWVAGLPWWFLGNLRSNY<br/>TPRSNGSTD LQTNQDVGTAI VSDTTDDLWFLNESVSEQLGVGIKVEAADTEQTSEEVGKVS DKKVIEVGK<br/>NDDLEDSKSLSDDTDVEVTS EDEWQCTECKKFNSPSKRYCFRCWALRKDWYSDCSKLTHS LSTSDITAIP<br/>EKENE GNDVPDCRRTI SAPVVRPKDAYIKKENS KLFDP CN SVEFLDLAHS SESQETISSMGEQLDNLSEQ<br/>RDTTENMEDCQNLLKPCSLCEKRPRDGNIIHGRTGHLVTCFHCARRLKA GASCPICKKEIQLVIKVFIA</p> <p><b>Notes</b><br/>"Serine 367 (S367) is located within the putative binding sequence for 14-3-3, and its substitution with alanine (S367A) abolishes binding of Mdmx to 14-3-3. Transfection assays indicated that the S367A mutation, in cooperation with Mdm2, enhances the ability of Mdmx to repress the transcriptional activity of p53. The S367A</p>                                                                                                                                                                                                                                                                                                                                                                                                                                                                                        |  |

mutant is more resistant to Mdm2-dependent ubiquitination and degradation than wild-type Mdmx, and Mdmx phosphorylated at S367 is preferentially degraded by Mdm2. “  
 Chk2-mediated phosphorylation of MDMX on S367 is important for stimulating 14-3-3 binding, MDMX nuclear import by a cryptic nuclear import signal, and degradation by MDM2.

“Serine/threonine kinase Akt mediates phosphorylation of MDMX at Ser367 (Lopez-Pajares et al 2008).

**References to 14-3-3-binding to mdm4 (MdmX)**

Okamoto K, Kashima K, Pereg Y, Ishida M, Yamazaki S, Nota A, Teunisse A, Migliorini D, Kitabayashi I, Marine JC, Prives C, Shiloh Y, Jochemsen AG, Taya Y. DNA damage-induced phosphorylation of MdmX at serine 367 activates p53 by targeting MdmX for Mdm2-dependent degradation. Mol Cell Biol. 2005 Nov;25(21):9608-20  
 LeBron C, Chen L, Gilkes DM, Chen J. Regulation of MDMX nuclear import and degradation by Chk2 and 14-3-3. EMBO J. 2006 Mar 22;25(6):1196-206.

Jin Y, Dai MS, Lu SZ, Xu Y, Luo Z, Zhao Y, Lu H. 14-3-3gamma binds to MDMX that is phosphorylated by UV-activated Chk1, resulting in p53 activation. EMBO J. 2006 Mar 22;25(6):1207-18

Lopez-Pajares V, Kim MM, Yuan ZM. Phosphorylation of MDMX mediated by Akt leads to stabilization and induces 14-3-3 binding. J Biol Chem. 2008 May 16;283(20):13707-13. Epub 2008 Mar 20

**Human MEFV** Pyrin (Swissprot = O15553)

```

1  MAKTPSDHLL  STLEELVPYD  FEKFKFKLQN  TSVQKEHSRI  PRSQIQRARP  VKMATLLVTY
61  YGEEYAVQLT  LQVLRRAINQR  LLAEELHRAA  IQEYSTQENG  TDDSAASSSL  GENKPRSLKT
121 PDHPEGNEGN  GPRPYGGGAA  SLRCSQPEAG  RGLSRKPLSK  RREKASEGLD  AQGKPRTRSP
181 ALPGGRSPGP  CRALEGGQAE  VRLRRNASSA  GRLQGLAGGA  PGQKECRPFE  VYLPSPGMRP
241 R5LEVTISTG  EKAPANPEIL  LTLEEKTAAN  LDSATEPRAR  PTPDGGASAD  LKEGPGNPEH
301 SVTGRPPDTA  ASPRCHAQEG  DPVDGTCVRD  SCSFPEAVSG  HPQASGSRSP  GCPRCQDSHE
361 RKSPPGSLSP  PLPQCKRHLK  QVQLLFCEDH  DEPICLICSL  SQEHQGHVRV  PIEEVALEHK
421 KKIQQKLEHL  KKLKRSAGEE  RSYGEEKAVS  FLKQTEALKQ  RVQRKLEQVY  YFLEQQEHFF
481 VASLEDVQGM  VGQIRKAYDT  RVSQDIALLD  ALIGELEAKE  CQSEWELLQD  IGDILHRAKT
541 VPVPEKWTTP  QEIKQKIQLL  HQKSEFVEKS  TKYFSETLRS  EMEMFNVPPEL  TGAQAHAVNV
601 ILDAETAYPN  LIFSDDLKSV  RLGKWKWERLP  DGPQRFDSCI  IVLGSPSFSL  GRRYWEVEVG
661 DKTAWILGAC  KTSISRKGNM  TSPENGYWV  VIMMKENEYQ  ASSVPPTRLL  IKEPPKRVGI
721 FVDYRVGSIS  FYNVTARSHI  YTFASCFSFG  PLQPIFSPGT  RDGGKNTAPL  TICPVGGQGP
781 D
  
```

>gi|8928170|sp|O15553.1|MEFV\_HUMAN RecName: Full=Pyrin; AltName: Full=Marenostrin

```

MAKTPSDHLLSTLEELVPYDFEKFKFKLQNTSVQKEHSRI PRSQIQRARPVKMATLLVTY YGEEYAVQLT
LQVLRRAINQRLLAEELHRAAIQEYSTQENGTDDSAASSSLGENKPRSLKTPDHPEGNEGN GPRPYGGGAA
SLRCSQPEAGRGLSRKPLSKRREKASEGLDAQGKPRTRSPALPGGRSPGPCRALEGGQAEVRLRRNASSA
GRLQGLAGGAPGQKECRPFEVYLPSPGMRPRSRLEVTISTG EKAPANPEILLTLEEKTAANLDSATEPRAR
PTPDGGASADLKEGPGNPEHSVTGRPPDTAASPRCHAQEGDPVDGTCVRDSCSFPEAVSGHPQASGSRSP
GCPRCQDSHERKSPGSLSPQPLPQCKRHLKQVQLLFCEDHDEPICLICLSQEHQGHVRVPIEEVALEHK
KKIQQKLEHLKLRKRSAGEE RSYGEEKAVSFLKQTEALKQRVQRKLEQVY YFLEQQEHFFVASLEDVQGM
VGQIRKAYDTRVSQDIALLDALIGELEAKECQSEWELLQDIGDILHRAKTVPVPEKWTTPQEIKQKIQLL
HQKSEFVEKSTKYFSETLRSEMEMFNVPPELIGAQAHAVNVILDAETAYPNLIFSDDLKSVRLGKWKWERLP
DGPQRFDSCIIVLGSPSFSLGRRYWEVEVGDKTAWILGACKTISRKGNMTLSPENGYWVIMMKENEYQ
ASSVPPTRLLIKEPPKRVGIFVDYRVGSISFYNVTARSHIYTFASCFSFGPLQPIFSPGTRDGGKNTAPL
TICPVGGQGP
  
```

**Notes**

Pyrin probably controls the inflammatory response in myelomonocytic cells at the level of the cytoskeleton organization. Pyrin.fl is phosphorylated, and this modification mediated 14.3.3 binding. Serines 208, 209, and 242, within exon 2, acted as critical residues in the interaction between pyrin.fl and 14.3.3, and pSer208 thought more likely than 209 to be the phosphorylation responsible for binding to 14-3-3. When an S208-S209-S242A pyrin.fl triple mutant or wild-type pyrin.fl in the presence of an inhibitor of 14.3.3-ligand interactions was used, promotion of nuclear translocation of pyrin was observed.

**References to 14-3-3 binding to pyrin**

Jéru I, Papin S, L'hoste S, Duquesnoy P, Cazeneuve C, Camonis J, Amselem S. Interaction of pyrin with 14.3.3 in an isoform-specific and phosphorylation-dependent manner regulates its translocation to the nucleus. Arthritis Rheum. 2005 Jun;52(6):1848-57

**Human MTF** MTF Microphthalmia-associated transcription factor (Swissprot = O75030)

```

1  MQSESGIVPD  FEVGEEFHEE  PKTYEYELKSQ  PLKSSSSAEH  PGASKPPISS  SSMTSRILLR
61  QQLMREQMQE  QERREQQQKL  QAAQFMQQRV  PVSQTPAINV  SVPTTLPSAT  QVPMEVLKVQ
121 THLENPTKYH  IQQAQRQVVK  QYLSTTLANK  HANQVLSLPC  PNQPGDHVMP  PVPGSSAPNS
181 PMAMLTLSNS  CEKEGFYKFE  EQNRAESECP  GMNTHSRASC  MQMDDVIDDI  ISLESSYNEE
241 ILGLMDPALQ  MANTLPVSGN  LIDLGNQGL  PPPGLTISNS  CPANLPNIKR  ELTACIFPTE
301 SEARALAKER  QKKDNHNLIE  RRRRFNINDR  IKELGTLIPK  SNPDPMRWNK  GTILKASVDY
361 IRKLQREQQR  AKELENRQKK  LEHANRHLL  RIQELEMQAR  AHGLSLIPST  GLCSPDLVNR
421 IIKQEPVLEN  CSQDLLQHHA  DLTCTTTLDL  TDGTTTFNNN  LGTGTEANQA  YSVPTKMGSK
481 LEDILMDDTL  SPVGVTDPPL  SSVSPGASKT  SSRSSMSME  ETEHTC
  
```

>gi|13124344|sp|O75030.2|MTF\_HUMAN RecName: Full=Microphthalmia-associated transcription factor

```

MQSESGIVPDFEVGEEFHEEFPKTYEYELKSQPLKSSSSAEHPGASKPPISSSSMTSRILLRQQLMREQMQE
QERREQQQKLQAAQFMQQRV PVSQTPAINVSVPTTLPSATQVPMEVLKVQTHLENPTKYHIQQAQRQVVK
QYLSTTLANKHANQVLSLPCPNQPGDHVMPVVPGSSAPNSPMAMLTLSNSCEKEGFYKFE EQNRAESECP
GMNTHSRASC MQMDDVIDDI ISLESSYNEE ILGLMDPALQ MANTLPVSGN LIDLGNQGL PPPGLTISNS
CPANLPNIKRELTACIFPTESEARALAKERQKKDNHNLIERRRRFNINDR IKELGTLIPKSNPDPMRWNK
GTILKASVDYIRKLQREQQRAKELENRQKKLEHANRHLLRIQELEMQARAHGLSLIPSTGLCSPDLVNR
IIKQEPVLENCSDLLQHHADLTCTTTLDLTDGTTTFNNNLGTGTEANQAYSVPTKMGSKLEDILMDDTL
SPVGVTDPPLSSVSPGASKTSSRRSSMSMEETEHTC
  
```

**Notes**

Microphthalmia-associated transcription factor that contains both basic helix-loop-helix and leucine zipper

|                                                                                                                                                                                                                                                                                                                                                                                                                                                                                                                                                                                                                                                                                                                                                                                                                                                                                                                                                                                                                                                                                                                                                                                                                                                                                                                                                                                                                                                                                                                                                                                                                                                                                                                                                                                                                                                                                                                                                                                                                                                                                                                                                                                                                                                                                                                                                                                                                                 |                                             |
|---------------------------------------------------------------------------------------------------------------------------------------------------------------------------------------------------------------------------------------------------------------------------------------------------------------------------------------------------------------------------------------------------------------------------------------------------------------------------------------------------------------------------------------------------------------------------------------------------------------------------------------------------------------------------------------------------------------------------------------------------------------------------------------------------------------------------------------------------------------------------------------------------------------------------------------------------------------------------------------------------------------------------------------------------------------------------------------------------------------------------------------------------------------------------------------------------------------------------------------------------------------------------------------------------------------------------------------------------------------------------------------------------------------------------------------------------------------------------------------------------------------------------------------------------------------------------------------------------------------------------------------------------------------------------------------------------------------------------------------------------------------------------------------------------------------------------------------------------------------------------------------------------------------------------------------------------------------------------------------------------------------------------------------------------------------------------------------------------------------------------------------------------------------------------------------------------------------------------------------------------------------------------------------------------------------------------------------------------------------------------------------------------------------------------------|---------------------------------------------|
| <p>structural features. Plays a critical role in the differentiation of various cell types including neural crest- derived melanocytes, mast cells, osteoclasts and optic cup-derived retinal pigment epithelium. Two isoforms are known: the M-isoform is expressed exclusively in melanocytes, while the A-isoform has a much broader range of expression. Mutations in MITF can lead to Waardenburg syndrome. Ten alternatively spliced isoforms have been described.</p> <p>C-TAK1 increased MITF/14-3-3 complex formation and thus promoted cytoplasmic localization of MITF. C-TAK1 interaction was disrupted by RANKL/CSF-1 treatment. 14-3-3-binding site is Ser173 (PGLTISN<sup>s</sup>CPANLPN (Bronisz et al 2006, supplementary, which is equivalent to Ser280 in the canonical O75030).</p> <p>MITF is highly related to the bHLH-Zip transcription factor TFE3 that was identified as 14-3-3 binding partner by mass spectrometry analysis (Jin et al Curr Biol. 2004 Aug 24;14(16):1436-50). TFE3 has a site similar to Ser173 in MITF, which is a potential 14-3-3-binding site in TFE3 (PAITVSN<sup>s</sup>CPAELPN).</p> <p><b>References to 14-3-3 binding to MITF</b><br/>Bronisz A, Sharma SM, Hu R, Godlewski J, Tzivion G, Mansky KC, Ostrowski MC. Microphthalmia-associated transcription factor interactions with 14-3-3 modulate differentiation of committed myeloid precursors. Mol Biol Cell. 2006 Sep;17(9):3897-906.</p>                                                                                                                                                                                                                                                                                                                                                                                                                                                                                                                                                                                                                                                                                                                                                                                                                                                                                                                                                                          |                                             |
| <p><b>Human Mif1</b> Myeloid leukemia factor 1 isoform 1 (Swissprot = P58340)</p> <p>1 MFRMLNSSF E DDPFFSESIL AHRENMRQMI RSFSEPFGRD LLSISDGRGR AHNRRGHNDG<br/>61 EDSLTHTDVS SFQTMQMV NMRNYMQKLE RNFQQLSVDP NGHSCSSSV MTYSKIGDEP<br/>121 PKVFQASTQT RRAPGGIKET RKAMRSDSG LERMAIGHHI HDRAHVIKKS KNKKTGDDEEV<br/>181 NQEFINMNES DAHAFDEEWQ SEVLKYKPGR HNLGNTRMRS VGHENPGSRE LKRREKQQS<br/>241 PAIEHGRRSN VLGDKLHIK G SSVKSNKK</p> <p>&gt;gi 17368170 sp P58340.1 MLF1_HUMAN RecName: Full=Myeloid leukemia factor 1;<br/>AltName: Full=Myelodysplasia-myeloid leukemia factor 1<br/>MFRMLNSSFEDDPFFSESILAHRENMRQMI RSFSEPFGRD LLSISDGRGRAHNRRGHNDGEDSLTHTDVS<br/>SFQTMQMVSNMRNYMQKLERNFQQLSVDPNGHSCSSSVMTYSKIGDEPKVFQASTQTRRAPGGIKET<br/>RKAMRSDSGLEKMAIGHHIHDRAHVIKKS KNKKTGDDEEVNQEFINMNESDAHAFDEEWQSEVLKYKPGR<br/>HNLGNTRMRSVGHENPGSRELKRREKQQSPAIEHGRRSNVLGDKLHIKGS SVKSNKK</p> <p><b>Notes</b><br/>MRQMIR(pS34)FSEPFGRDL = 14-3-3-binding site on Mif1 (protein kinase unknown, targeted by NRBP1 ? (pseudokinase in WNK branch of kinome)<br/>88KLERNFGQLSVD P = NES human (Yoneda-Kato and Kato 2008)<br/>Ala50 to Gln125 = Interaction with CSN3/COPS3 (Yoneda-Kato and Kato 2008)<br/>Klinken et al (2002) Studies the MOUSE form of Mif1; 88ELQRNFGQLSMD100 = NES DIFFERENT ISOFORM?</p> <p><b>References to 14-3-3 binding to Mif1</b><br/>Winteringham LN, Endersby R, Kobelke S, McCulloch RK, Williams JH, Stillitano J, Cornwall SM, Ingley E, Klinken SP. Myeloid leukemia factor 1 associates with a novel heterogeneous nuclear ribonucleoprotein U-like molecule. J Biol Chem. 2006 Dec 15;281(50):38791-800.<br/>Lim R, Winteringham LN, Williams JH, McCulloch RK, Ingley E, Tiao JY, Lalonde JP, Tsai S, Tilbrook PA, Sun Y, Wu X, Morris SW, Klinken SP. MADM, a novel adaptor protein that mediates phosphorylation of the 14-3-3 binding site of myeloid leukemia factor 1. J Biol Chem. 2002 Oct 25;277(43):40997-1008<br/>Yoneda-Kato N, Kato JY. Shutling imbalance of MLF1 results in p53 instability and increases susceptibility to oncogenic transformation. Mol Cell Biol. 2008 Jan;28(1):422-34 (NES)</p>                                                                                                                                                                                                                                                                                        |                                             |
| <p><b>Human MLK3</b> (Swissprot = Q16584)</p> <p>1 MEPLKSLFLK SPLGSWNGSG SGGGGGGGG RPEGSPKAAG YANPVWTALF DYEPSGQDEL<br/>61 ALRKGDRVEV LSRDAAISGD EGWWAGQVGG QVGIFPSNYV SRGGGPPPC E VASFQELRLR<br/>121 EVIGIGGF GK VYRGSWRGEL VAVKAARQDP DEDISVTAE S VRQEARLFAM LAHPNIIALK<br/>181 AVCLEEPNLC LVMEYAAGGP LSRALAGRRV PPHVLVNWAV QIARGMHYLH CEALVPVIHR<br/>241 DLKSNNILLL QPIESDDMEH KTLKITDFGL AREWHKTTQM SAAGTYAWMA PEVIKASTFS<br/>301 KGSVDVWVFGV LLWELLTGEV PYRGIDCLAV AYGVAVNKLT LPIPTSTCEP FAQLMADCWA<br/>361 QDPHRRPDFAS ILQQLLEALE AQLREMPRDS SFHSMQEGWK REIQGLFDEL RAKEKELLSR<br/>421 EEELTRAARE QRSQAEQLRR REHLLAQWEL EVFERELTLL LQQVDRERPH VRRRRGTFRK<br/>481 SKLRARDGGE RISMPDLDFKH RITVQASPL DRRRNVEVFG PGDSPTFRF RAIQLEPAEP<br/>541 GQAWGRQSPR RLEDSSNGER RACWAWGPSS PKPGEAQRN RRSRMDEATW YLSDSDSSPL<br/>601 GSPSTPPALN GNPPRPSLEP EEPKRPVPAE RGSSSGTPKL IQRALLRGT LLASLGLGRD<br/>661 LQPPGGPGRE RGEPTTPTPT PTPAPCTEP PPSPLICFSL KTPDSPPTPA PLLLDLGI PV<br/>721 QRSASKSPR EEPGRTTPT PTPAPCTEP PPSPLICFSL KTPDSPPTPA PLLLDLGI PV<br/>781 FVSAGPRPS LPSQPAPRR APWTLFPDSD PFWDSPANP FQGGPQCRA QTKDMGAQAP<br/>841 WVPEAGP</p> <p>&gt;gi 71153819 sp Q16584.1 M3K11_HUMAN RecName: Full=Mitogen-activated protein kinase kinase 11; AltName: Full=Mixed lineage kinase 3; AltName: Full=Src-homology 3 domain-containing proline-rich kinase<br/>MEPLKSLFLK SPLGSWNGSGSGGGGGGG RPEGSPKAAGYANPVWTALFDYEPSGQDELALRKGDRVEV<br/>LSRDAAISGD EGWWAGQVGGQVGIFPSNYVSRGGGPPPC E VASFQELRLRLEVIGIGGF GKVYRGSWRGEL<br/>VAVKAARQDP DEDISVTAE SVRQEARLFAM LAHPNIIALKAVCLEEPNLC LVMEYAAGGPLSRALAGRRV<br/>PPHVLVNWAV QIARGMHYLH CEALVPVIHRDLKSNNILLL QPIESDDMEH KTLKITDFGL AREWHKTTQM<br/>SAAGTYAWMA PEVIKASTFSKGSVDVWVFGVLLWELLTGEV PYRGIDCLAVAYGVAVNKLT LPIPTSTCEP<br/>FAQLMADCWA QDPHRRPDFAS ILQQLLEALE AQLREMPRDS SFHSMQEGWKREIQGLFDEL RAKEKELLSR<br/>EEELTRAARE QRSQAEQLRR REHLLAQWEL EVFERELTLL LQQVDRERPH VRRRRGTFRKSKLRARDGGE<br/>RISMPDLDFKH RITVQASPL DRRRNVEVFG PGDSPTFRFRAIQLEPAEP GQAWGRQSPR RLEDSSNGER<br/>RACWAWGPSSPKPGEAQRNRRSRMDEATW YLSDSDSSPLGSPSTPPALN GNPPRPSLEPEEPKRPVPAE<br/>RGSSSGTPKLIQRALLRGTALLASLGLGRDLQPPGGPGRE RGEPTTPTPT PTPAPCTEP PPSPLICFSL<br/>KTPDSPPTPA PLLLDLGI PVGQRSASKSPRE EEPGRTTPT PTPAPCTEP PPSPLICFSL<br/>KTPDSPPTPA PLLLDLGI PVGQRSASKSPRE EEPGRTTPT PTPAPCTEP PPSPLICFSL<br/>PLRSRIDPWS FVSAGPRPS LPSQPAPRR APWTLFPDSD PFWDSPANP FQGGPQCRA QTKDMGAQAP<br/>WVPEAGP</p> <p><b>Notes</b></p> | <p>SITES NOT KNOWN.<br/>NOT IN WEBLOGO.</p> |

Could not find papers characterizing an interaction between MLK3 and 14-3-3. Papers do however mention phosphorylation of 14-3-3 affecting Bax localization. MLK3 a TKL kinase of the MLK family. Has an amino-terminal SH3 domain followed by the kinase domain, two leucine zipper domains, a cdc42/Rac1 binding (CRIB) domain and several other domains/motifs at the carboxy-terminal region. Phosphorylates IkappaB and activates SEK1 and MKK7.

**Zhang QG**, Akt inhibits MLK3/JNK3 signaling by inactivating Rac1: a protective mechanism against ischemic brain injury. *J Neurochem*. 2006 Sep;98(6):1886-98.

**Human MST1R** (Ron) Tyrosine kinase receptor for MSP (macrophage-stimulating protein receptor) (Swissprot = Q04912)

```

1  MELLPLPQSFLLLLLLPAKPAAGEDWQCPRTPYAASRDFDVKYVVPVSFSSAGGLVQAMVT
61  YEGDRNESAVFVAIRNRLHV LGPDLKSVQS LATGPAGDFG CQTCAACGPG PHGPPGDGDT
121 KVLVLDPALPALVSCGSSSLQ GRCFLHDLEP QGTAVHLAAP ACLFSAHNNR PDDCPDCVAS
181 PLGTRVTVVE QGQASYFYVA SSDLAAVAGS FSPRSVSIRR LKADASGFAP GFVALSVLPK
241 HLVSYSIEYV HSFHTGAFVY FLTVPQASVT DDPSALHTRL ARLSATEPEL GDYRELVLDC
301 RFAPKRRRRR APEGGQPYVP LQVAHSAPVG AQLATELSIA EGQEVLFVGF VTGKDGPGV
361 GPNSVVCAFPI IDLLDTLIDE GVERCCESPV HPGLRRLGDF FQSPSFCPNP PGLLEALSNT
421 SCRHFPLLVS SFSRVDLDFN GLLGVPQVTA LYVTRLDNVT VAHMGTM DGRILQVELVRS
481 NYLLYVSNFS LGDSGQPVQR DVSRLGDHLL FASGDQVFQV PIRGPGCRHF LTCGRCLRA
541 HFMGCGWCGN MCGQQKECPG SWQQDHCPK LTFEHPHSGP LRGSTRLTLC GSNFYLHPSG
601 LVPEGTHQVT VGQSPCRPLP KDSKLRPVP RKDFVEEFEC ELEPLGTQAV GPTNVSLTVT
661 NMPGKHFVRV DGTSVLRGFS FMEPVLIAVQ PLFGPRAGGT CLTLEGQSLV VGTSAVLVN
721 GTECLLARVS EGQLLCATPP GATVASVPLS LQVGGAQVPG SWTFQYREDP VVLSISPNCG
781 YINSHITICG QHLTSAWHLV LSFHDGLRAV ESRRCERLPE QQLCRLPEYV VRDPQGWVAG
841 NLSARGDGAAGFTLPGFRFL PPHPPSANL VPLKPEEHA KFEYIGLGAV ADCVGINVTV
901 GGESCQHEFR GDMVVCPLPP SLQLGQDGAP LQVCVDGECH ILGRVVRPGP DGVPQSTLLG
961 ILLPLLLLVV ALATALVFSY WWRKQLVLP PNLNDLASLD QTAGATPLPI LYSGSDYRSG
1021 LALPAIDGLD STTCVHGASF SDESESCVP LLRKESIQLR DLDSALLAEV KDVLIPIHERV
1081 VTHSDRVIGK GHFGVVYHGE YIDQAQNR IQCAIKSLSRIT EMQQVEAFLR EGLLMRGLNH
1141 PNVLALIGIM LPPEGLPHVL LPYMCHGDL LQFIRSPQRNP TVKDLISFGL QVARGMEYLA
1201 EQKFVHRDLA ARNCMLDESF TVKVADFGLA RDILDREYYS VQQRHARLP VKWMALESQ
1261 TYRFTTKSDV WSFVLLWEL LTRGAPPYRH IDPFDLTHFL AQGRRLPQPE YCPDSLYQVM
1321 QQCWEADPAV RPTFRVLVGE VEQIVSALLG DHYVQLPATY MNLGPST SHE MNVRPEQPQF
1381 SPMPGNVRRP RPLSEPPRPT

```

>gi|585912|sp|Q04912.1|RON\_HUMAN RecName: Full=Macrophage-stimulating protein receptor; Short=MSP receptor; AltName: Full=p185-Ron; AltName: Full=CDw136; AltName: CD\_antigen=CD136; Contains: RecName: Full=Macrophage-stimulating protein receptor alpha chain; Contains: RecName: Full=Macrophage-stimulating protein receptor beta chain; Flags: Precursor

MELLPLPQSFLLLLLLPAKPAAGEDWQCPRTPYAASRDFDVKYVVPVSFSSAGGLVQAMVTYEGDRNESAVFVAIRNRLHVLGPDLLKSVQSLATGPAGDFG CQTCAACGPGPHGPPGDGDTDKVLVLDPALPALVSCGSSSLQ GRCFLHDLEPQGTAVHLAAPACLFSAHNNRPDDCPDCVASPLGTRVTVVEQGQASYFYVASSLDAAVAGS FSPRSVSIRR LKADASGFAPGFVALSVLPKHLVSYSIEYVHSFHTGAFVYFLTVPQASVTDDPSALHTRL ARLSATEPELGDYRELVLDCRFAPKRRRRRGAPEGGQPYVPV LQVAHSAPVGAQLATELSIAEGQEVLFVGFVTGKDGPGVGPNSVVCAFPI IDLLDTLIDE GVERCCESPVHPGLRRLGDF FQSPSFCPNP PGLLEALSNT SCRHFPLLVS SFSRVDLDFN GLLGVPQVTA LYVTRLDNVT VAHMGTM DGRILQVELVRS LNYLLYVSNFS LGDSGQPVQR DVSRLGDHLL FASGDQVFQV PIRGPGCRHF LTCGRCLRAWHFMGCGWCGNMCGQQKECPG SWQQDHCPK LTFEHPHSGPLRGSTRLTLCGNSFYLHPSGLVPEGTHQVTVGQSPCRPLPKDSKLRPVP RKDFVEEFEC ELEPLGTQAV GPTNVSLTVT NMPGKHFVRV DGTSVLRGFS FMEPVLIAVQ PLFGPRAGGT CLTLEGQSLVSGTSAVLVNGTECLLARVSEGQLLCATPPGATVASVPLS LQVGGAQVPGSWTFQYREDP VVLSISPNCGYINSHITICGQHLTSAWHLVLSFHDGLRAVESRRCERLPEQQLCRLPEYVVRDPQGWVAG NLSARGDGAAGFTLPGFRFL PPHPPSANL VPLKPEEHA KFEYIGLGAV ADCVGINVTVGGESCQHEFR GDMVVCPLPPSLQLGQDGAP LQVCVDGECH ILGRVVRPGPDGVPQSTLLG ILLPLLLLVV ALATALVFSY WWRKQLVLP PNLNDLASLDQTAGATPLPI LYSGSDYRSG LALPAIDGLD STTCVHGASF SDESESCVP LLRKESIQLR DLDSALLAEV KDVLIPIHERV VTHSDRVIGK GHFGVVYHGE YIDQAQNR IQCAIKSLSRIT EMQQVEAFLR EGLLMRGLNHPNVLALIGIMLPPEGLPHVLLPYMCHGDL LQFIRSPQRNP TVKDLISFGL QVARGMEYLA EQKFVHRDLA ARNCMLDESF TVKVADFGLA RDILDREYYS VQQRHARLP VKWMALESQ TYRFTTKSDV WSFVLLWEL LTRGAPPYRH IDPFDLTHFL AQGRRLPQPE YCPDSLYQVM QQCWEADPAV RPTFRVLVGE VEQIVSALLG DHYVQLPATY MNLGPST SHE MNVRPEQPQF SPMPGNVRRP RPLSEPPRPT

**Notes**  
RPL(pS1394)EP

**References to 14-3-3 binding to MST1R (Ron)**  
Santoro MM, Gaudino G, Villa-Moruzzi E. Protein phosphatase 1 binds to phospho-Ser-1394 of the macrophage-stimulating protein receptor. *Biochem J*. 2003 Dec 15;376(Pt 3):587-94.  
Santoro MM, Gaudino G, Marchisio PC. The MSP receptor regulates alpha6beta4 and alpha3beta1 integrins via 14-3-3 proteins in keratinocyte migration. *Dev Cell*. 2003 Aug;5(2):257-71.

**Human NCOR1** Transcriptional corepressor (Swissprot = O75376), related to SMRT, which also binds 14-3-3

```

1  MSSSGYPPNQ GAFSTEQSRYP PHSVQYTFP NTRHQQEFV PDYRSSHLEV SQASQLLQQQ
61  QQQLRRRPS LLSEFHGSD RPQERRTSYE PFHPGSPVD HDSLESKRPR LEQVSDSHFQ
121 RVSAAVPLV HPLPEGLRAS ADAKDPAPG GKHEAPSPI SGQPCGDDQN ASPSKLSKEE
181 LIQSMDRVDR EIAKVEQQIL KLKKKQQQLE EEAAPPEPE KPVSPPPVEQ KHRSIVQIIY
241 DENRKAEEA HKIFEGGLPK VELPLYNQPS DTKVYHENIK TNQVMRKKLI LFFKRRNHAR
301 KQREQKICQR YDQLMEAWEK KVDRIENNPR RKAKESKRE YYEKQFPEIR KQREQQERFQ
361 RVGQRGAGLS ATIARSEHEI SEIIDLSEQ ENNEKQMRQL SVIPPMMFDA EQRRVKFINM
421 NGLMEDPMKV YKDRQFMNVW TDHEKEIFKD KFIQHPKNFG LIASYLERS VPDCVLYYYL
481 TKKNENYKAL VRRNYGKRRG RNQIARPSQ EEKVEEKED KAEKTEKKEE EKKDEEEKDE
541 KEDSKENTKE KDKIDGTAE TEEREQATPR GRKTANSQGR RKGRITRSM T NEAAAASAA

```



601 AAATEEPPPP LPPPEPIST EPVETSRWTE EEMEVAKKGL VEHGRNWAAI AKMVGTKSEA  
661 QCKNFYFNYK RRRHLDNLLQ QHKQKTSRKP REERDVSQCE SVASTVSAQE DEDIEASNEE  
721 ENPEDSEVEA VKPSEDSPEN ATSRGNTEPA VELEPTTETA PSTSPSLAVP STKPAEDES  
781 ETQVNDISISA ETAEQMDVDQ QEHSAEEGSV CDPATKAD SVDVEVRVPE NHASKVEGDN  
841 TKERDLDRAS EKVEPRDEDL VVAQQINAQR PEPQSDNDSS ATCSADEDVD GEPERQRMFP  
901 MDSKPSLLNP TGSILVSSPL KPNPLDLPQL QHRAAVIPPM VSTPCNIP I GTFVSGYALY  
961 QRHIKAMHES ALLEEQRQRQ EQIDLECRSS TSPCGTSKSP NREWEVLQPA PHQVITNLPE  
1021 GVRPLPTRPT RPPPLIPSS KTTVASEKPS FIMGGSISQG TPGTYLTSN QASYTQETPK  
1081 PSVGSISLGL PRQESAKSA TLPYIKQEEF SPRSQNSQPE GLLVRAQHEG VVRGTAGAIQ  
1141 EGSITRGTP SKISVESIPS LRGSITQGT ALPQTGIPTE ALVKGSISRM PIEDSSPEKG  
1201 REEAASKGHV IYEGKSGHIL SYDNIKARE GTRSPRTAHE ISLKRSYESV EGNIKQGMMS  
1261 RESVVSAPLE GLICRALPRG SPHSDLKERT VLSGSIQGT PRATTESFED GLKYPKQIKR  
1321 ESPPIRAFEG AITKGPYDG ITTIKEMGRS IHEIPRQDIL TQESRKTPEV VQSTRPI IEG  
1381 SISQGTPIKF DNNSGQSAIK HNVKSLITGP SKLSRGMPLP EIVPENIKVV ERGKYEDVKA  
1441 GETVRSRHTS VVSSGSPVLR STLHEAPKAQ LSPGIYDDTS ARRTPVSYQN TMSRGSMPMN  
1501 RTSVDTISSN KSTNHERKST LTPQRESIP AKSPVPGVDP VVSHSPFDPH HRGSTAGEVY  
1561 RSHLPTHLDP AMPFHRALDP AAAAYLFQRQ LSPTPGYPSQ YQLYAMENR QTIILNDYITS  
1621 QMQVNLRPD VARGLSPREQ PLGLPYPATR GIIDLTMNPP TILVPHPGGT STPPMDRITY  
1681 IPGTQITFPF RPYNSASMS RPYNSASMS GHPTHAAAA SAERERERER EKERERERIA AASDLYLRP  
1741 GSEQGRPGS HGYVRSPPS VRTQETMLQQ RPSVFGTNG TSVITPLDPT AQLRIMPLPA  
1801 GGPSISQGLP ASRYNTAADA LAALVDAAS APQMDVSKTK ESKHEARLE ENLRSRAAV  
1861 SEQQQLEQKT LEVEKRSVQC LYTSSAFPSG KPQPHSSVVY SEAGKDKGPP PKSRYEELR  
1921 TQKTTITAA NFIDVITRQ IASDKDARER GSQSSDSSS LSSHRYETPS DAIEVISPAS  
1981 SPAPPQEKQL TYQPEVVKAN QAENDPTRQY EGPLHHYRQ QESPPQQQL PPSSQAEGMG  
2041 QVPRTHRLIT LADHICQIIT QDFARNQVSS QTPQPPPTST FQNSPSALVS TPVRTKTSNR  
2101 YSPEQAQSV HHQRPGSRVS PENLVDKSRG SRPGKSPERS HVSSEPEYPI SPPQVPPVHE  
2161 KQDLSLLSQ RGAEPAEQRN DARSPPSISY LPSFFTKLEN TSPMVKSKQI EFRKLNSSG  
2221 GGDSMAAAQ PGTEIFNLPA VTTSGSVSSR GHSFADPASN LGLEDIRKA LMGSFDDKVE  
2281 DHGVMSQPM GVVPGTANTS VVTSGETRRE EGDPSPHSGG VCKPKLISKS NSRKS KSPIP  
2341 GQGYLGTERR SSVSSVHSEG DYHRQTPGWA WEDRPSSTGS TQFPYNPLTM RMLSSPTPTP  
2401 IACAPSAVNO AAPHQNRW EREPAPLLSA QYETLSDSD

>gi|47117817|sp|075376.2|NCOR1\_HUMAN RecName: Full=Nuclear receptor corepressor 1; Short=N-CoR1; Short=N-CoR

MSSSGYPPNQAGAFSTEQSRYPHVSQYTFPNTRHQQEFVAVPDYRSSHLEVSQASQLLQQQQQQQLRRRPS  
LLSEFHPGSDRPPQERRTSYEFPHFGPSPVDHDSLESKRPRLEQVSDSHFQRVSAAVLPLVHPLPEGLRAS  
ADAKKDPAFGGKHEAPSSPISGQPCGDDQNASPSKLSKEELIQSMDRVDREIAKVEQQILKLLKKKQQQLE  
EAAKPEPEKPVSPPPVEQKHSIVQIIYDENRKAEEAHHKIFEGLGPKVELPLYNQPSDTKVYHENIK  
TNQVMRKKLILFFKRRNHARKQREKQICQRYDQLMEAWKVDRIENNPRRKAESKTREYEEKQFPEIR  
KQREQQERFQRVGQAGLQATIAARSEHEISEIIDGLSEQENNEKQMRQLSVIPMMFDAEQRRVKINM  
NGLMEDPMKVKDRQFMNVWTDHEKEIFKDKFIQHPKNFGLIASYLERKSVPCVLYYYLTKKNENYKAL  
VRRNYGKRRGRNQIARPSQEEKVEEKEEDKAETEKKEEKKDEEKEDEKESKENTKEKDKIDGTAAE  
TEEREQATPRGRKTANSQGRRKGRITRSMTNEAAAAASAAAAATEEPPPLPFPPEP ISTEPEVETSRWTE  
EEMEVAKKGLVEHGRNWAAIAKMGVTKSEAQCKNFYFNYKRRHLDNLLQHQKQKTSRKP REERDVSQCE  
SVASTVSAQEDIEDIEASNEEENPEDSEVEAVKPSDSPENATSRGNTEPAVELEPTTETAPSTSPSLAVP  
STKPAEDES VETQVNDISISAETAEQMDVDQ QEHSAEEGSVCDPPPATKADSVDEVRVPENHASKVEGDN  
TKERDLDRASEKVEPRDEDLVVAQQINAQRPEPQSDNDSSATCSADEDVDGEPERQRMFPMDSKPSLLNP  
TGSILVSSPLKPNPLDLPQLQHRAAVIPPMVSTPCNIP IGTVPYALYQRHIKAMHESALLEEQRQRQ  
EQIDLECRSSTSPCGTSKSPNREWEVLQPAHQVITNLPEGVRPLPTRPTPPPLIPSSKTTVASEKPS  
FIMGGSISQGTPTGTYLTSNQAASYTQETPKPSVGSISLGLPRQESAKSATLPYIKQEEFSPRSQNSQPE  
GLLVRAQHEGVVRGTAGAIQEGSITRGTPSTKISVESIPSLRGSITQGTALPQTGIPTEALVKGSISRM  
PIEDSSPEKGREAAASKGHV IYEGKSGHILSYDNIKAREGTRSPRTAHE ISLKRSYESV EGNIKQGMMS  
RESVVSAPLEGLICRALPRGSPHSDLKERTVLSGSIQGT PRATTESFEDGLKYPKQIKRESPPIRAFEG  
AITKGPYDGITTIKEMGRS IHEIPRQDIL TQESRKTPEV VQSTRPI IEGSISQGTPIKFDNNSGQSAIK  
HNVKSLITGPKLSRGMPLP EIVPENIKVV ERGKYEDVKAETVRSRHTS VVSSGSPVLRSTLHEAPKAQ  
LSPGIYDDTS ARRTPVSYQN TMSRGSMPMNRTSARTISSN KSTNHERKSTLTPQRESIP AKSPVPGVDP  
VVSHSPFDPHHRGSTAGEVYRSHLPTHLDPAMPFHRALDPA AAAAYLFQRQLSPTPGYPSQYQLYAMENR  
QTIILNDYITSQMQVNLRPDVARGLSPREQPLGLPYPATRGIIDLTMNPP TILVPHPGGTSTPPMDRITY  
IPGTQITFPF RPYNSASMS PGHPTHAAAA SAERERERER EKERERERIA AASDLYLRP GSEQGRPGS  
HGYVRSPPS VRTQETMLQQ RPSVFGTNG TSVITPLDPTAQLRIMPLPAGGPSISQGLPASRYNTAADA  
LAALVDAASAPQMDVSKTKESKHEARLEENLRSRAAVSEQQQLEQKTLEVEKRSVQC LYTSSAFPSG  
KPQPHSSVVYSEAGKDKGPPPKSRYEELRTRGKTTITAA NFIDVITRQ IASDKDARERGSQSSDSSS  
LSSHRYETPSDAIEVISPASSPAPPQEKQLTYQPEVVKANQAENDPTRQYEGPLHHYRPPQESPPQQQL  
PPSSQAEGMGQVPRTHRLITLADHICQIITQDFARNQVSSQTPQPPPTSTFQNSPSALVSTPVRTKTSNR  
YSPEQAQSVHHQRPGSRVSPENLVDKSRGSRPGKSPERSHVSSEPEYPI SPPQVPPVHEKQDLSLLSQ  
RGAEPAEQRNDARSPPSISY LPSFFTKLENTSPMVKSKQIEFRKLNSSGGGDSMAAAQPGTEIFNLPA  
VTTSGSVSSRHSFADPASNLGLEDIRKALMGSFDDKVEDHGVMSQPMGVVPGTANTS VVTSGETRRE  
EGDPSPHSGGVCKPKLISKSNRKS KSPIPGQGYLGTERRSSSVSSVHSEG DYHRQTPGWA WEDRPSSTGS  
TQFPYNPLTMRLSSPTPTPIACAPSAVNOAAPHQNRW EREPAPLLSAQYETLSDSD

**Notes**  
Phosphorylation of Ser2345 and Ser2348 (by IKKalpha) creates a functional 14-3-3-binding domain (SRK(pS2348)KSPIPGQ) (Fernández-Majada et al 2007). N-CoR1 is a protein that regulates the activity of some transcription factors, including nuclear receptors, by promoting histone deacetylation and chromatin condensation, thereby altering the accessibility of various genes to the transcriptional machinery. Is known to play a role genetic programming including that for myogenesis. Is a component of a large corepressor complex that contains SIN3A/B and histone deacetylases HDAC1 and HDAC2. This complex associates with the thyroid and the retinoic acid receptors in the absence of ligand. Interacts with the catalytic domain of HDAC9. Increased expression correlates with the loss of vitamin D responsiveness in aggressive androgen-independent prostate cancer cells. Its gene tends

|                                                                                                                                                                                                                                                                                                                                                                                                                                                                                                                                                                                                                                                                                                                                                                                                                                                                                                                                                                                                                                                                                                                                                                                                                                                                                                                                                                                                                                                                                                                                                                                                                                                                                                                                                                                                                                                                                                                                                                                                                                                                                                                                                                                                                                                                                                                                                                                                                                                                                                                                                                                                                                                                                                                                                                                                                                                                                                                                                                                                                                                                                                                                                                                                                                                                                                                                                                                                                                                                                                                                                                                                                                                                                                        |                                                                                                                                                                                         |
|--------------------------------------------------------------------------------------------------------------------------------------------------------------------------------------------------------------------------------------------------------------------------------------------------------------------------------------------------------------------------------------------------------------------------------------------------------------------------------------------------------------------------------------------------------------------------------------------------------------------------------------------------------------------------------------------------------------------------------------------------------------------------------------------------------------------------------------------------------------------------------------------------------------------------------------------------------------------------------------------------------------------------------------------------------------------------------------------------------------------------------------------------------------------------------------------------------------------------------------------------------------------------------------------------------------------------------------------------------------------------------------------------------------------------------------------------------------------------------------------------------------------------------------------------------------------------------------------------------------------------------------------------------------------------------------------------------------------------------------------------------------------------------------------------------------------------------------------------------------------------------------------------------------------------------------------------------------------------------------------------------------------------------------------------------------------------------------------------------------------------------------------------------------------------------------------------------------------------------------------------------------------------------------------------------------------------------------------------------------------------------------------------------------------------------------------------------------------------------------------------------------------------------------------------------------------------------------------------------------------------------------------------------------------------------------------------------------------------------------------------------------------------------------------------------------------------------------------------------------------------------------------------------------------------------------------------------------------------------------------------------------------------------------------------------------------------------------------------------------------------------------------------------------------------------------------------------------------------------------------------------------------------------------------------------------------------------------------------------------------------------------------------------------------------------------------------------------------------------------------------------------------------------------------------------------------------------------------------------------------------------------------------------------------------------------------------------|-----------------------------------------------------------------------------------------------------------------------------------------------------------------------------------------|
| <p>to be overexpressed in multiple-myeloma cell lines.</p> <p><b>References to 14-3-3 binding to N-CoR</b><br/> Fernández-Majada V, Pujadas J, Vilardell F, Capella G, Mayo MW, Bigas A, Espinosa L. Aberrant cytoplasmic localization of N-CoR in colorectal tumors. <i>Cell Cycle</i>. 2007 Jul 15;6(14):1748-52.</p>                                                                                                                                                                                                                                                                                                                                                                                                                                                                                                                                                                                                                                                                                                                                                                                                                                                                                                                                                                                                                                                                                                                                                                                                                                                                                                                                                                                                                                                                                                                                                                                                                                                                                                                                                                                                                                                                                                                                                                                                                                                                                                                                                                                                                                                                                                                                                                                                                                                                                                                                                                                                                                                                                                                                                                                                                                                                                                                                                                                                                                                                                                                                                                                                                                                                                                                                                                                |                                                                                                                                                                                         |
| <p><b>Human Ndel1</b> (Swissprot = Q9GZM8)</p> <p>1 MDGEDIPDFSLKEETAYWK ELSLKYKQSF QEARDELVEF QEGRSRELEAE LEAQLVQAEQ<br/> 61 RNRDLQADNQ RLKYEVEALK EKLEHQYAQS YKQVSVLEDD LSQTRAIKEQ LHKYVRELEQ<br/> 121 ANDDLERAKR ATIVSLEDDE QRLNQAIERN AFLESELEDEK ESLLVSVQRL KDEARDLRQE<br/> 181 LAVRERQQEV TRKSAPSPPT LDCEKMDSAV QASLSLPAEP VGKGTENTFP SPKAIPNGFG<br/> 241 TSPLTPSARI SALNIVGDLR RKGVALESKL AACRNFAKDQ ASRKSYSISGN VNCGVNLNGN<br/> 301 TKFSRSRGHTS FFDKGAVNGF DPAPPPGGLG SSRPSPAPGM LPLSV</p> <p>&gt;gi 74725006 sp Q9GZM8.1 NDEL1_HUMAN RecName: Full=Nuclear distribution protein nudE-like 1; Short=Protein Nudel; AltName: Full=Mitosis-associated protein 1</p> <p>MDGEDIPDFSSLKEETAYWKELSLKYKQSFQEARDELVEFQEGRSRELEAELEAQLVQAEQRNRDLQADNQ<br/> RLKYEVEALKKLEHQYAQSYKQVSVLEDDLSQTRAIKEQLHKYVRELEQANDDLERAKRATIVSLEDDE<br/> QRLNQAIERNAFLESELEDEKESLLVSVQRLKDEARDLRQELAVRERQQEVTRKSAPSPPTLDCEKMDSAV<br/> QASLSLPAEPVGKGTENTFPSPKAIPNGFGTSPPLTPSARISALNIVGDLRKGVALESKLAACRNFAKDQ<br/> ASRKSYSISGNVNCGVNLNGNTKFSRSRGHTSFFDKGAVNGFDPAPPPGGLGSSRPSPAPGMPLPLSV</p> <p><b>Notes</b><br/> "14-3-3E binds to CDK5/p35-phosphorylated NUDEL and this binding maintains NUDEL phosphorylation. Similar to LIS1, deficiency of 14-3-3 results in mislocalization of NUDEL and LIS1, consistent with reduction of cytoplasmic dynein function. We produced substitution mutants for each of the CDK5 sites of NUDEL: S198A, T219A and S231A. Each single or double mutant compromised, and the triple mutant completely eliminated, interaction with 14-3-3E. These Ser/Thr mutants had no effect on the interaction of LIS1 and NUDEL in yeast or as recombinant proteins. Mutation of two other phosphorylation sites (Ser242, Thr245) located outside of the binding region had only mild effects on interaction." (Toyo-oka et al 2003)</p> <p><b>References to 14-3-3 binding to Ndel1</b><br/> Toyo-oka K, Shionoya A, Gambello MJ, Cardoso C, Leventer R, Ward HL, Ayala R, Tsai LH, Dobyns W, Ledbetter D, Hirotsune S, Wynshaw-Boris A. 14-3-3epsilon is important for neuronal migration by binding to NUDEL: a molecular explanation for Miller-Dieker syndrome. <i>Nat Genet</i>. 2003 Jul;34(3):274-85.</p>                                                                                                                                                                                                                                                                                                                                                                                                                                                                                                                                                                                                                                                                                                                                                                                                                                                                                                                                                                                                                                                                                                                                                                                                                                                                                                                                                                                                                                                                                   | <p>THREE phosphoSER-PRO SITES - NOT LIKE ANY OTHER 14-3-3-BINDING SITES-NOT IN WEBLOGO (IN YELLOW ARE TWO 14-3-3-BINDING SITES IDENTIFIED HERE, SEE MAIN TEXT (NEW NOT IN WEBLOGO))</p> |
| <p><b>Human NEDD4L E3 ubiquitin ligase Nedd4.2</b> (Swissprot = Q7Z5N3)</p> <p>1 MATGLGEPVY GLSEDEGESR ILRVKVSVGI DLAKKDIFGA SDPYVKLSLY VADENRELAL<br/> 61 VQTKTIKKTLPKWNNEEFYF RVNPSNHRLL FEVFDENRLT RDDFLGQVDV PLSHLPTEDEP<br/> 121 TMERPYTFKD FLLRPRSHKS RVKGFRLKMA YMPKNGGQD EENSQDRDDM EHGWEVVDNS<br/> 181 DSASQHQKEL LPPPLPPGWE EKVDNLGRTY YVNHNNRTTQ WHRPSLMDVS SESDNNIRQI<br/> 241 NQEAHRRFR SRRHISEDLE PEPSEGGDVP EPWETISEEV NIAGDSLGLA LPPPPASPGS<br/> 301 RTSPQELSEE LSRLQITPD SNGEQFSSLI QREPSSRLRS CSVTDAVAEQ GHLPPPSAPA<br/> 361 GRARSSTVTG GEEPTPSVAY VHTTPGLPSG WEERKDAKGR TYVNNHNNRT TTWTRPIMQL<br/> 421 AEDGASGSAT NSNNHLIEPQ IRRRPSLSSP TVTLSAPLEG AKDSPVRRVAV KDTLSNPQSP<br/> 481 QPSPYNSPKP QHKVTQSFLP PGWEMRIAPN GRPFFIDHNT KTTTWEDPRL KFPVHMRSKT<br/> 541 SLNPNDLGLP PPGWEERIHL DGRTFYIDHN SKITQWEDPR LQNPAITGPA VPYSREFKQK<br/> 601 YDYFRKLLK PADIPNRFEM KLHRNNIFEE SYRRIMSVKR PDVLRKARLWI EFSEKGLDY<br/> 661 GSVAREWFFL LSKEMFNPHY GLEFYSATDN YTLQINPNSG LCNEDHLSYF TFIGRVAGLA<br/> 721 VFHGKLLDGF FIRPFYKMLL GKQITLNDME SVDSEYYNSL KWILENDPTE LDLMFCIDEE<br/> 781 NFGQTYQVDL KPNGSEIMVT NENKREYIDL VIQWRFVNRV QKQMNAFLEG FTELLPIDLI<br/> 841 KIFDENELEL LMCGLGDVDV NDWRQHSIYK NGYCPNHPVI QWFWKAVLLM DAEKRIRLLQ<br/> 901 FVTGTSRVPM NGFAELYGSN GPQLFTIEQW GSPEKLPRAH TCFNRLDLPP YETFEDLREK<br/> 961 LLMAVENAQQ FEGVD</p> <p>&gt;gi 74713674 sp Q7Z5N3 Q7Z5N3_HUMAN NEDD4.2</p> <p>MATGLGEPVYGLSEDEGESRILRVKVVSGIDLAKKDIFGASDPYVKLSLYVADENRELALVQTKTIKKTLPKWNNEEFYFRVNPNSNHRLLFEVFDENRLTRDDFLGQVDVPLSHLPTEDEPTMERPYTFKDFLLRPRSHKS RVKGFRLKMA YMPKNGGQDEENSQDRDDMEHGWEVVDNSDASQHQKELPPPLPPGWEKVDNLGRTY YVNHNNRTTQWHRPSLMDVSSSESDNNIRQINQEAHRRFRSRRHISEDLEPEPSEGGDVPWETISEEV NIAGDSLGLALPPPPASPGSRTPSPQELSELSRLQITPD SNGEQFSSLIQREPSSRLRSCSVTDAVAEQ GHLPPPSAPAGRARSSTVTGEEPTPSVAYVHTTPGLPSGWEERKDAKGRTYVNNHNNRTTTWTRPIMQL AEDGASGSATNSNNHLIEPQIRRRPSLSSPTVTL S APLEGAKDSPVRRVAVKDTLSNPQSPQPSPYNSPKP QHKVTQSFLPPGWEMRIAPN GRPFFIDHNTKTTTWEDPRLKFPVHMRSKTSLNPNDLGLPPGWEEERIHL DGRTFYIDHNSKITQWEDPRLQNPAITGPAVPYSREFKQKYDYFRKLLKPPADIPNRFEMKLHRNNIFEE SYRRIMSVKRPDVLKARLWIEFSEKGLDYGGVAREWFFLLSKEMFNPHYGLFEYSATDNYTLQINPNSG LCNEDHLSYFTFIGRVAGLAVFHGKLLDGF FIRPFYKMLL GKQITLNDMESVDSEYYNSLKWILENDPTE LDLMFCIDEE NFGQTYQVDL KPNGSEIMVTNENKREYIDLVIQWRFVNRVQKQMNAFLEGFTELLPIDLI KIFDENELELLMCGLGDVDVNDWRQHSIYKNGYCPNHPVIQWFWKAVLLMDAEKRIRLLQFVTGTSRVPM NGFAELYGSN GPQLFTIEQWGSPEKLPRAHTCFNRLDLPPYETFEDLREKLLMAVENAQQFEGVD</p> <p><b>Notes</b><br/> NEDD4L E3 ubiquitin-protein ligase which accepts ubiquitin from an E2 ubiquitin-conjugating enzyme in the form of a thioester and then directly transfers the ubiquitin to targeted substrates. Inhibits TGF-beta signaling by triggering SMAD2 and TGFR1 ubiquitination and proteasome-dependent degradation. Promotes ubiquitination and internalization of various plasma membrane channels such as ENaC, Nav1.2, Nav1.3, Nav1.5, Nav1.7, Nav1.8, Kv1.3, EAAT1 or CLC5. Promotes ubiquitination and degradation of SGK. Interacts with NDFIP2 and UBE2E3. Interacts via its WW domains with SCNN1A, SCNN1B, SCNN1G, SCN1A, SCN2A, SCN3A, SCN5A, SCN8A, SCN9A, SCN10A and CLCN5. Interacts with SMAD2, SMAD3, SMAD6 and SMAD7. The phosphorylated form interacts with 14-3-3 proteins. Interacts with Epstein-Barr virus LMP2A. Interacts with NDFIP1 in vitro. 8 isoforms of the human protein are produced by alternative splicing.</p> <p><b>References to 14-3-3 binding to Nedd4.2</b><br/> Liang X, Butterworth MB, Peters KW, Walker WH, Frizzell RA. An obligatory heterodimer of 14-3-3beta and 14-3-3epsilon is required for aldosterone regulation of the epithelial sodium channel. <i>J Biol Chem</i>. 2008 Oct</p> |                                                                                                                                                                                         |

10;283(41):27418-25  
 Lee IH, Campbell CR, Cook DI, Dinudom A. Regulation of epithelial Na<sup>+</sup> channels by aldosterone: role of Sgk1. *Clin Exp Pharmacol Physiol*. 2008 Feb;35(2):235-41.  
 Nagaki K, Yamamura H, Shimada S, Saito T, Hisanaga S, Taoka M, Isobe T, Ichimura T. 14-3-3 Mediates phosphorylation-dependent inhibition of the interaction between the ubiquitin E3 ligase Nedd4-2 and epithelial Na<sup>+</sup> channels. *Biochemistry*. 2006 May 30;45(21):6733-40.  
 Bhalla V, Daidié D, Li H, Pao AC, LaGrange LP, Wang J, Vandewalle A, Stockand JD, Staub O, Pearce D. Serum- and glucocorticoid-regulated kinase 1 regulates ubiquitin ligase neural precursor cell-expressed, developmentally down-regulated protein 4-2 by inducing interaction with 14-3-3. *Mol Endocrinol*. 2005 Dec;19(12):3073-84  
 Liang X, Peters KW, Butterworth MB, Frizzell RA. 14-3-3 isoforms are induced by aldosterone and participate in its regulation of epithelial sodium channels. *J Biol Chem*. 2006 Jun 16;281(24):16323-32.  
 Ichimura T, Yamamura H, Sasamoto K, Tominaga Y, Taoka M, Kakiuchi K, Shinkawa T, Takahashi N, Shimada S, Isobe T. 14-3-3 proteins modulate the expression of epithelial Na<sup>+</sup> channels by phosphorylation-dependent interaction with Nedd4-2 ubiquitin ligase. *J Biol Chem*. 2005 Apr 1;280(13):13187-94

**Human NFATC4 (NFAT3)** Nuclear factor of activated T-cells (Swissprot = Q14934)  
 1 MGAASCEDEE LEFKLVFGEE KEAPPLGAGG LGEELDSEDA PPCCRLALGE PPHYGAAPIG  
 61 IPRPPPPRPG MHSPPPRPAP SPGTWESQPA RSVRLGGPGG GAGGAGGGRV LECPSIRITS  
 121 ISPTPEPPAA LEDNPDAGWD GSPRDYPPPE GFGGYREAGG QGGGAFFSPS PGSSSLSSWS  
 181 FFSDASDEEA LYAACDEVES ELNEAASRFG LGSPLPSRA SPRPWTPEDP WSLYGPSPGG  
 241 RGPEDSWLLL SAPGTPASP RPASPCGKRR YSSGTPSSA SPALSRRGSL GEEGSEPPPP  
 301 PPLPLARDPG SPGPFYVGA PPAESIPQKT RRTSSEQAVA LPRSEEPASC NGKPLGAE  
 361 SVAPPGSRK EVAGMDYLAV PSLAWSKAR IGGHSPIFRT SALPPLDWPL PSQYEQLELR  
 421 IEVQRAHHR AHYETEGSRG AVKAAAPGGHP VVKLLGYSEK PLTLQMFIGN ADERNLRPHA  
 481 FYQVHRITGK MVATASYEAV VSGTKVLEMT LLPENMAAN IDCAGILKLR NSDIELRKGE  
 541 TDIGRKNTRV RLVFRVHVVP GGGKVVSVQA ASVPIECSQR SAQELPQVEA YSPSACSVRG  
 601 GEELVLTGSN FLPDSKVVFI ERGPDGKLQW EEEATVNRLQ SNEVTLTLTV PEYSNKRVS  
 661 PVQVYFVSN GRRKRSPTQS FRFLPVICKE EPLPDSLLRG FPSASATPFG TDMDFSPRP  
 721 PYPSPHEDP ACETPYLSEG FGYGMPPLYP QTGPPPSYRP GLRMFPETRG TTGCAQPPAV  
 781 SFLPRFPSPD PYGGRGSSFS LGLPFSPPAP FRPPPLPASP PLEGGPFSQS DVHPLPAEYG  
 841 NKVGPYGPGE GAPEQEKS RGGYSSGFRDS VPIQGITLEE VSEIIGRDL SGPAPPGEPP  
 901 PA  
 >gi|215274090|sp|Q14934.2|NFAC4\_HUMAN RecName: Full=Nuclear factor of activated T-cells, cytoplasmic 4; Short=NF-ATc4; Short=NFATc4; AltName: Full=T-cell transcription factor NFAT3; Short=NF-AT3  
 MGAASCEDEELEFKLVFGEEKEAPPLGAGGLGEELDSEDAPPCCRLALGEPHYGAAPIGIPRPPPPRPG MHSPPPRPAPSPGTWESQPARSVRLGGPGGGAGGAGGGRVLECPISIRITSISPTPEPPAALEDNPDAGWD GSPRDYPPPEGFGGYREAGGQGGGAFFSPSPGSSSLSSWSFFSDASDEEAALYAACDEVESLNEAASRFG LGSPLPSRASPRPWTPEDPWSLYGSPGGRGPEDSWLLLAPGTPASPRPASPCGKRRYSSSGTPSSA SPALSRRGSLGEEGSEPPPPPLPLARDPGSPGPFYVGAAPPAESIPQKTRRTSSEQAVALLPRSEEPASC NGKPLGAEESVAPPGSRKEVAGMDYLAVPSPLAWSKARIGGHSPIFRTSALPPLDWPLPSQYEQLELR IEVQRAHHRAHYETEGSRGAVKAAAPGGHPVVKLLGYSEKPLTLQMFIGNADERNLRPHAFYQVHRITGK MVATASYEAVVSGTKVLEMTLLPENMAANIDCAGILKLRNSDIELRKGETDIGRKNTRVRLVFRVHVVP GGGKVVSVQAASVPIECSQRSAQELPQVEAYSPSACSVRGEEELVLTGSNFPDSKVVFIERGPDGKLQW EEEATVNRLQSNVTLTLTVPEYSNKRVS RPVQVYFVSNRRKRSPTQSFRLPVICKEEPLPDSLLRG FPSASATPFGTDMDFSPRPYPYPSPHEDPACETPYLSEGFGYGMPPLYPQTGPPPSYRPLRMFPETRG TTGCAQPPAVSFLPRFPSPDPYGGGRGSSFSLGLPFSPPAPFRPPPLPASP PLEGGPFSQSDVHPLPAEYG NKVGPYGPGE GAPEQEKS RGGYSSGFRDSVPIQGITLEEVSEIIGRDL SGPAPPGEPPA  
**Notes**  
 SPRPASPCGKRRYpS<sup>272</sup>SSGTPSSASPALS RRGpS<sup>289</sup>LGEEGSEPPPPPL  
 Ser272 and Ser289 are conserved in other members of the NFAT family  
**References to 14-3-3 binding to NFATC4 (NFAT3)**  
 Chow CW, Davis RJ. Integration of calcium and cyclic AMP signaling pathways by 14-3-3. *Mol Cell Biol*. 2000 Jan;20(2):702-12.

**Human NOXA1** activator of NOX1, a superoxide-producing NADPH oxidase (Swissprot = Q86UR1)  
 1 MASLGDLVRA WHLGAQAVDR GDWARALHLF SGVPAPPARL CFNAGCVHLL AGDPEAALRA  
 61 FDQAVTKDTC MAVGFFQRGV ANFQLARFQE ALSDFWLAL QLRGHAAIDY TQLGLRFKLG  
 121 AWEVLHNVAS AQCQLGLWTE AASSLREAMS KWPEGSLNGL DSALDQVQR GSLPPRQVPR  
 181 GEVFRPHRW LKHLEPVDFL GKAKVVASAI PDDQGWGVRP QQPQGPANH DARSLIMDSP  
 241 RAGTHQGPLD AETEVGADRC TSTAYQEQR QVEQVQKQAP LSPGLPAMGG PGPGPCEDPA  
 301 GAGGAGAGGS EPLVTVTVQC AFTVALRARR GADLSSLRAL LGQALPHQAQ LGQLSYLAPG  
 361 EDGHWVPIPE EESLQRAWQD AACPRGLQL QCRGAGGRPV LYQVVAQHSY SAQGPEDLGF  
 421 RQGDVTVLVC EVDQAWLEGH RDGRIGIFPK CFVVPAGPRM SGAPGRLPRS QQGDQP  
 >gi|74759404|sp|Q86UR1.1|NOXA1\_HUMAN RecName: Full=NADPH oxidase activator 1; Short=NOX activator 1; AltName: Full=P67phox-like factor; AltName: Full=p51-nox; AltName: Full=NCF2-like protein; AltName: Full=Antigen NY-CO-31  
 MASLGDLVRAWHLGAQAVDRGDWARALHLFSGVPAPPARLFCNAGCVHLLAGDPEAALRAFDQAVTKDTC MAVGFFQRGVANFQLARFQEALSDFWLALQLRGHAAIDY TQLGLRFKLGAWVHLHNVAS AQCQLGLWTE AASSLREAMSKWPEGSLNGLDSALDQVQRGSLPPRQVPRGEVFRPHRWLKHLEPVDFL GKAKVVASAI PDDQGWGVRPQQPQGPANHDARSLIMDSPRAGTHQGPLDAETEVGADRC TSTAYQEQRQVEQVQKQAP LSPGLPAMGGPGGPCEDPAGAGGAGAGGSEPLVTVTVQCAFTVALRARRGADLSLRALLGQALPHQAQ LGQLSYLAPGEDGHWVPIPEEESLQRAWQDAACPRGLQLQCRGAGGRPVLYQVVAQHSYSAQGPEDLGF RQGDVTVLVC EVDQAWLEGHCDGRIGIFPKCFVVPAGPRMSGAPGRLPRSQQGDQP  
**Notes**  
 NOXA1 is an activator of NOX1, a superoxide-producing NADPH oxidase in the production of reactive oxygen species (ROS) which participate in a variety of biological processes including host defense, hormone

|                                                                                                                                                                                                                                                                                                                                                                                                                                                                                                                                                                                                                                                                                                                                                                                                                                                                                                                                                                                                                                                                                                                                                                                                                                                                                                                                                                                                                                                                                                                                                                                                                                                                                                                                                                                                                                                                                                                                                                                                                                                                                                                                                                                                                                                                                                                                                                                                                                                                                                                                                                                                                                                                                                                                                                                                                                                                                                                                                                                                                                            |  |
|--------------------------------------------------------------------------------------------------------------------------------------------------------------------------------------------------------------------------------------------------------------------------------------------------------------------------------------------------------------------------------------------------------------------------------------------------------------------------------------------------------------------------------------------------------------------------------------------------------------------------------------------------------------------------------------------------------------------------------------------------------------------------------------------------------------------------------------------------------------------------------------------------------------------------------------------------------------------------------------------------------------------------------------------------------------------------------------------------------------------------------------------------------------------------------------------------------------------------------------------------------------------------------------------------------------------------------------------------------------------------------------------------------------------------------------------------------------------------------------------------------------------------------------------------------------------------------------------------------------------------------------------------------------------------------------------------------------------------------------------------------------------------------------------------------------------------------------------------------------------------------------------------------------------------------------------------------------------------------------------------------------------------------------------------------------------------------------------------------------------------------------------------------------------------------------------------------------------------------------------------------------------------------------------------------------------------------------------------------------------------------------------------------------------------------------------------------------------------------------------------------------------------------------------------------------------------------------------------------------------------------------------------------------------------------------------------------------------------------------------------------------------------------------------------------------------------------------------------------------------------------------------------------------------------------------------------------------------------------------------------------------------------------------------|--|
| <p>biosynthesis, oxygen sensing and signal transduction. May also activate CYBB/gp91phox and NOX3. NOX1, NOXA1, NOXO1, RAC1 and CYBA forms a functional multimeric complex supporting ROS production. Interaction with 14-3-3 prevents the interaction of NOXA1 with NOXO1 and RAC1 and its targeting to membranes, hence reducing its ability to activate NOX1. Belongs to the NCF2/NOXA1 family. Three isoforms of the human protein are produced by alternative splicing. Ser(172) and Ser(461) of NoxA1 as phosphorylation sites for protein kinase A (PKA). A consequence of this phosphorylation was the enhancement of NoxA1 complex formation with 14-3-3 proteins. 14-3-3 binding induce the dissociation of NoxA1 from the Nox1 complex at the plasma membrane, suggesting a mechanism for the inhibitory effect on Nox1 activity. GST-NoxA1 deletion mutants were amplified by PCR using pGEX4T3-NoxA1 as a template, and the following oligonucleotides as primers: The sequence (AA110841) and phosphorylated 14-3-3-binding sites were confirmed in an email from the authors.</p> <p><b>References to 14-3-3 binding to human NOXA1</b><br/>Kim JS, Diebold BA, Babior BM, Knaus UG, Bokoch GM. Regulation of Nox1 activity via protein kinase A-mediated phosphorylation of NoxA1 and 14-3-3 binding. <i>J Biol Chem.</i> 2007 Nov 30;282(48):34787-800</p>                                                                                                                                                                                                                                                                                                                                                                                                                                                                                                                                                                                                                                                                                                                                                                                                                                                                                                                                                                                                                                                                                                                                                                                                                                                                                                                                                                                                                                                                                                                                                                                                                                                                |  |
| <p><b>Human NR1P1 (RIP140)</b> Receptor interacting protein of 140 kDa (Swissprot = P48552)</p> <p>1 MTHGEELGSD VHQDSIVLTY LEGLLMHQAA GSGTAVDKK SAGHNEEDQN FNISGSAPFT<br/>61 CQSNPVLNT HTYQSGMLH LKKARLLQSS EDWNAAKRKR L<sup>S</sup>DSIMNLNV KKEALLAGMV<br/>121 DSVKPKGQDS TLLASLLQSF SSRLQTVALS QQIRQSLKEQ GYALSHDSLK VEKDLRCYGV<br/>181 ASSHLKTLK KSKVKDQKPD TNLPDVTKNL IRDRFAESFH HVGQSGTKVM SEPLSCAARL<br/>241 QAVASMVKEK ASPATSPKPS VACSQLALLL SSEAHLQQYS REHALKTQNA NQAASERLAA<br/>301 MARLQENGQK DVGSYQLPKG MSSHLNGQAR TSSSKLMASK SSATVFQNP GII PSSPKNA<br/>361 GPKNSLERNN IKQAANNSLL LHLLKSQTIP KPMNGHSHSE RGSIFFEESST PTTIDEYSDN<br/>421 NPSFTDDSSG DESSYSNCVP IDLSCKHRTE KESDQPVSL DNFTQSLNT WDPKVPDVI<br/>481 KEDQDTSKNS KLNHQKVTLL LQLLLGHKNE ENVEKNTSPQ GVHNDVSKFN TQNYARTSVI<br/>541 ESPSTNRTTP VSTPPLLTSS KAGSPINLSQ HSLVIKWNPS PYVCSTQSEK LTNTASNHSM<br/>601 DLTKSKDPPG EKPAQNEGAQ NSATFSASKL LQNLAQCGMQ SSMSVEEQR P SKQLLTGNTD<br/>661 KPIGMIDRLN SPLSNKTNA VEENKAFSSQ PTGPEPGLSG SEIENLLERR TVLQLLGNP<br/>721 NKGKSEKKEK TPLRDESTQE HSERALSEQI LMVKIKSEPC DDLQIPNTNV HLSHDAKSAP<br/>781 FLGMAPAVQR SAPALPVSED FKSEPVSPQD FFSKNGLLS RLLRQNDQSY LADDSDRSHR<br/>841 NNEMALLESK NLCMVPPKRRK LYTEPLENPF KMKNNIVDA ANNHSAPVYL YGSLNQEEL<br/>901 KFSRNDLEFK YPAGHGSASE SEHRSWARES KSFNVLKQLL LSENCVRDLS PHRSNSVADS<br/>961 KKKGHKNNVT NSKPEFSISS LNGLMYSSTQ PSSCMDNRTF <sup>S</sup>YPGVVKTVP SPTFPEHLGC<br/>1021 AGSRPESGLL NGCSPSEKGI PIKWITDAE KNEYEKDSFR LTKTNPILYY MLQKGGNSVT<br/>1081 SRETQDKDIW REASSAESVS QVTAKEELLP TAETKASFFN LRSYPNSHMG NNASRPHSAN<br/>1141 GEVYGLLGSV LTIKKESE</p> <p>&gt;gi 9988061 sp P48552.2 NR1P1_HUMAN RecName: Full=Nuclear receptor-interacting protein 1; AltName: Full=Nuclear factor RIP140; AltName: Full=Receptor-interacting protein 140</p> <p>MTHGEELGSDVHQSIVLTYLEGLLMHQAAAGSGTAVDKK SAGHNEEDQNFNISGSAPFTPCQSNPVLNT HTYQSGMLHLKKARLLQSS EDWNAAKRKR L<sup>S</sup>DSIMNLNVKKEALLAGMVD SVKPKGQDSTLLASLLQSF SSRLQTVALSQQIRQSLKEQGYALSHDSLKVEKDLRCYGVASSHLKTLKSKVKDQKPD TNLPDVTKNL IRDRFAESPHHVGQSGTKVMSEPLSCAARLQAVASMVKEKRASPATSPKPSVACSQLALLLSSEAHLQQYS REHALKTQNAQAASERLAAMARLQENGQKDVGSYQLPKGMSSHLNGQARTSSSKLMASKSATVFQNP GII PSSPKNAGYKNSLERNNIKQAANNSLLHLLKSQTIPKPMNGHSHSERGSIFFEESSPTTIDEYSDN NPSFTDDSSGDESSYSNCVPIDLSCKHRTEKESDQPVSLDNFTQSLNTWDPKVPDVIKEDQDTSKNS KLNHQKVTLLQLLLGHKNEENVEKNTSPQGVHNDVSKFN TQNYARTSVIESPSTNRTTPVSTPPLLTSS KAGSPINLSQHSLVIKWNSPPYVCSTQSEKLTNTASNHSMDLTKSKDPPEKPAQNEGAQNSATFSASKL LQNLAQCGMQSSMSVEEQRPSKQLLTGNTDKPIGIMIDRLNSPLSNKTNAVEENKAFSSQPTGPEPGLSG SEIENLLERTTVLQLLGNPNKKGSEKKEK TPLRDESTQEHSERALSEQI LMVKIKSEPCDDLQIPNTNV HLSHDAKSAPFLGMAPAVQRSAPALPVSEDFKSEPVSPQD FFSKNGLLSRLLRQNDQSYLADDSDRSHR NNEMALLESKNLCMVPPKRRKLYTEPLENPFKMKNNIVDAANNHSAPVYL YGSLNQEELKFSRNDLEFK YPAGHGSASESEHRSWARESKSFNVLKQLL LSENCVRDLS PHRSNSVADSKKKGHKNNVTNSKPEFSISS LNGLMYSSTQ PSSCMDNRTF SYPGVVKTVP SPTFPEHLGCAGSRPESGLLNGCSPSEKGIPIKWITDAE KNEYEKDS PRLTKTNPILYYMLQKGGNSVTSRETQDKDIWREASSAESVSQVTAKEELLPTAETKASFFN LRSYPNSHMGNNASRPHSANGEVYGLLGSVLTIKKESE</p> |  |
| <p><b>Notes</b><br/>KRKRL(pS102)DSIVN pSer102 PKC, 14-3-3 (species?) and DHRTF(pS1003)YPGMV pSer1003 PKC, 14-3-3 (species?) Ser1003 = Ser1001 in P48552.<br/>RIP140 modulates transcriptional activation by steroid receptors such as NR3C1, NR3C2 and ESR1. Also modulates transcriptional repression by nuclear hormone receptors. Interacts with the ligand binding domain (LBD) of NR2C1 in the absence of ligand. Interacts with RARA and RXRB homodimers and RARA/RXRB heterodimers in the presence of ligand. Interacts with HDAC1 and HDAC3 via its N-terminal domain. Found in a complex with both NR3C1 and YWHAH.</p> <p><b>References to 14-3-3-binding to NR1P1 (RIP140)</b><br/>Gupta P, Ho PC, Huq MD, Khan AA, Tsai NP, Wei LN. PKCepsilon stimulated arginine methylation of RIP140 for its nuclear-cytoplasmic export in adipocyte differentiation. <i>PLoS ONE.</i> 2008 Jul 16;3(7):e2658.<br/>Ziliacius J, Holter E, Wakui H, Tazawa H, Treuter E, Gustafsson JA. Regulation of glucocorticoid receptor activity by 14-3-3-dependent intracellular relocalization of the corepressor RIP140. <i>Mol Endocrinol.</i> 2001 Apr;15(4):501-11.</p>                                                                                                                                                                                                                                                                                                                                                                                                                                                                                                                                                                                                                                                                                                                                                                                                                                                                                                                                                                                                                                                                                                                                                                                                                                                                                                                                                                                                                                                                                                                                                                                                                                                                                                                                                                                                                                                                        |  |
| <p><b>Human PACS2</b> phosphofurin acidic cluster sorting protein 2 (Swissprot = Q86VP3)</p> <p>1 MAERGRGLP GAPGALNTPV PMNLFATWEV DGSSPSCVPR LCSLTLKKLV VFKELEKELI<br/>61 SVVIAVKMQG SKRILRSHEI VLPSPGQVET DLALTFSLQY PHFLKREGNK LQIMLQRRKR<br/>121 YKNRTILGYK TLAAGSISMA EVMQHPSEGG QVLSLCSISK EAPVKAEEIW IASLSSQPID<br/>181 HEDSTMQAGP KAKSTDNYSE EYESFSSSEQ EASDDAVQGG DLEDDEDFVG KPKKQRRSIV<br/>241 RTTSMTRQQN FKQKVVALLR RFKVSDEVLD SEQDPAEHIP EAEDLDLLY DTLDMEHPSD<br/>301 SGPDMEEDDS VLSFPKPKLR PYFEGLSHSS SQTEIGSIHS ARSHKEPPSP ADVPEKTRSL<br/>361 GGRQPSDSVS DTVALGVPGP REHPGQPEDS PEAEASTLDV FTERLPPSGR ITKTESLVIP</p>                                                                                                                                                                                                                                                                                                                                                                                                                                                                                                                                                                                                                                                                                                                                                                                                                                                                                                                                                                                                                                                                                                                                                                                                                                                                                                                                                                                                                                                                                                                                                                                                                                                                                                                                                                                                                                                                                                                                                                                                                                                                                                                                                                                                                                                                                                                                                                                                           |  |

|                                                                                                                                                                                                                                                                                                                                                                                                                                                                                                                                                                                                                                                                                                                                                                                                                                                                                                                                                                                                                                                                                                                                                                                                                                                                                                                                                                                                                                                                                                                                                                                                                                                                                                                                                                                                                                                                                                                                                                                                                                                                                                                                                                                                                                                                       |  |
|-----------------------------------------------------------------------------------------------------------------------------------------------------------------------------------------------------------------------------------------------------------------------------------------------------------------------------------------------------------------------------------------------------------------------------------------------------------------------------------------------------------------------------------------------------------------------------------------------------------------------------------------------------------------------------------------------------------------------------------------------------------------------------------------------------------------------------------------------------------------------------------------------------------------------------------------------------------------------------------------------------------------------------------------------------------------------------------------------------------------------------------------------------------------------------------------------------------------------------------------------------------------------------------------------------------------------------------------------------------------------------------------------------------------------------------------------------------------------------------------------------------------------------------------------------------------------------------------------------------------------------------------------------------------------------------------------------------------------------------------------------------------------------------------------------------------------------------------------------------------------------------------------------------------------------------------------------------------------------------------------------------------------------------------------------------------------------------------------------------------------------------------------------------------------------------------------------------------------------------------------------------------------|--|
| <p>421 STRSEGKQAG RRRGRSTSLKE RQARPQNER ANSLDNERCP DARSQQLQIPR KTVDYDQLNHI<br/> 481 LISDDQLPEN IILVNTSDWQ GQFLSDVLQR HTLPVVCTCS PADVQAAFST IVSRIQRYCN<br/> 541 CNSQPPTPVK IAVAGAQHLY SAILRFLVEQ LSHKTPDWLG YMRFLVIPLG SHPVARYLGS<br/> 601 VDYRYNFFQ DLAWRDLFNK LEAQSAVQDT PDIVSRITQY IAGANCAHQL PIAEAMLYTK<br/> 661 QKSPDEESSQ KFIPFVGVVK VGIVEPSSAT SGDSDDAAPS GSGTLSSTPP SASPAKEAS<br/> 721 PTPSPSPSVS GGLSSPSQGV GAELMGLQVD YWTAAQPADR KRDAEKKDL PTKNTLKCTF<br/> 781 RSLQVSRPLS SGEAAATPTM SMTVVTKERN KVMFLPKKA KDKDVESKSO CIEGSRILIC<br/> 841 TARQQNMLR VLIDGVECS D VKFFQLAAQW SSHVKHFPIC IFGHSKATF</p> <p>&gt;gi 117949768 sp Q86VP3.3 PACS2_HUMAN RecName: Full=Phosphofurin acidic cluster sorting protein 2; Short=PACS-2; AltName: Full=PACS1-like protein MAERGLGLPGAGALNTPVPMNLFATWEVDGSSPSCVPRCLSLTLKKLTVFKELEKELISVVIIVKMQG SKRILRSHEIVLPPSGQVETDLALTFSLQYPHFLKREGNKLQIMLQRRKRYKNRTILGYKTLAAGSISMA EVMQHPSEGGQVLSLCSISKEAPVKAEEIWIASLSQPIDHEDSTMQAGPKAKSTDNYSSEEEYESFSSEQ EASDDAVQGDLEDDFDVQKPKQRSSIVRTTSMTRQONFKQKVVALLRRFKVSDVLDSEQDPAEHIP EAEDDLDDLYDLDMEHPSDSGPDMEDDSVLSTPKPKLRPFYEGLSHSSSQTEIGSIHSARSHKEPPSP ADVPEKTRSLGGRQPSDSVSDTVALGVPGPREHPGQPEDSPEAEASTLDVFTERLPPSGRITKTESLVIP STRSEGKQAGRRGRSTSLKERQARPQNERANSLDNERCPDARSQQLQIPRKTVDYDQLNHIISDDQLPEN IILVNTSDWQGGFLSDVLQRHTLPVVCTCSPADVQAAFSTIVSRIQRYCNCSNPPTPVKIAVAGAQHLY SAILRFLVEQLSHKTPDWLGYMRFLVIPLGSHPVARYLGSVDYRYNFFQDLAWRDLFNKLEAQSAVQDT PDIVSRITQYIAGANCAHQLPIAEAMLYTKQKSPDEESSQKFI PFVGVVKGIVEPSSATSGDSDDAAPS GSGTLSSTPPSASPAKEASPTPPSPSVSGGLSSPSQGVGAELMGLQVDYWTAAQPADRKRDAEKKDL PTKNTLKCTFRSLQVSRPLSSGEAAATPTMSMTVVTKERNKVMFLPKKAKDKDVESKSO CIEGSRILIC TARQQNMLRVLIDGVECS D VKFFQLAAQWSSHVKHFPIC IFGHSKATF</p> <p><b>Notes</b><br/> “PKB/Akt-phosphorylated Ser437 binds 14-3-3 with high affinity”</p> <p><b>References to 14-3-3 binding to PACS2</b><br/> Aslan JE, You H, Williamson DM, Endig J, Youker RT, Thomas L, Shu H, Du Y, Milewski RL, Brush MH, Possemato A, Spratt K, Fu H, Greis KD, Runckel DN, Vogel A, Thomas G. Akt and 14-3-3 control a PACS-2 homeostatic switch that integrates membrane traffic with TRAIL-induced apoptosis. <i>Mol Cell.</i> 2009 May 14;34(4):497-509.</p>                                                                            |  |
| <p><b>Human PCTK1</b> PCTAIRE protein kinase 1 [Homo sapiens] (Swissprot = Q00536)</p> <p>1 MDRMKKIKRQ LSMTLRGGRG IDKTINGAPEQ IGLDESGGGG GSDPGEAPTR AAPGELRSAR<br/> 61 GPLSSAPEIV HEDLKMGS DG ESDQASATSS DEVQSPVVR MRNHPPRKIS TEDINKRSL<br/> 121 PADIRLPEGY LEKLTLSNPI FDKPLSRRLR RVSLSEIGFG KLETYIKLDK LGEGTYATVY<br/> 181 KGKSKLTDNL VALKEIRLEH EEGAPCTAIR EVSLLKDLKH ANIVTLHDI HTEKSLTLVF<br/> 241 EYLDKDLKQY LDDCGNIINM HNVKLFQ LRLGLAYCHRQ KVLHRDLKQP NLLINER GEL<br/> 301 KLADFG LARA KSIPTKTYSN EVVTLWYRPP DILLGSTDYS TQIDMWGVGC IFYEMATGRP<br/> 361 LFPGSTVEEQ LHFIFRILGT PTEETWPGIL SNEEFKTYNY PKYRAEALLS HAPRLDSDGA<br/> 421 DLLTKLLQFE GRNRISAEDA MKHPFFLSLG ERIHKLPD TT SIFALKEIQL QKEASLRSS<br/> 481 MPDSGRPAFR VVDTEF</p> <p>&gt;gi 266425 sp Q00536.1 PCTK1_HUMAN RecName: Full=Serine/threonine-protein kinase PCTAIRE-1; AltName: Full=PCTAIRE-motif protein kinase 1 MDRMKKIKRQLSMTLRGGRGIDKTINGAPEQIGLDESGGGGSDPGEAPTRAAPGELRSARGPLSSAPEIV HEDLKMGSDESDQASATSSDEVQSPVVRMRNHPPRKISTEDINKRSLPADIRLPEGYLEKLTLSNPI FDKPLSRRLRRVSLSEIGFGKLETYIKLDKLGEGTYATVYKGKSKLTDNLVALKEIRLEHEEGAPCTAIR EVSLLKDLKHANIVTLHDIHTEKSLTLVFEYLDKDLKQYLDCCGNIINMHNKLFQ LRLGLAYCHRQ KVLHRDLKQP NLLINER GELKLADFG LARAKSIPTKTYSNVVTWYRPPDILLGSTDYSTQIDMWGVGC IFYEMATGRPLFPGSTVEEQ LHFIFRILGTPTTEETWPGILSNEEFKTYNYPKYRAEALLSHAPRLDSDGA DLLTKLLQFEGRNRISAEDAMKHPFFLSLGERIHKLPD TT SIFALKEIQLQKEASLRSSMPDSGRPAFR VVDTEF</p> <p><b>Notes</b><br/> 14-3-3s bind to phosphoSer119 (NKRL(pS<sup>119</sup>LP) , one of the PKA sites on this protein.</p> <p><b>References to 14-3-3 binding to PCTAIRE-1</b><br/> Graeser R, Gannon J, Poon RY, Dubois T, Aitken A, Hunt T. Regulation of the CDK-related protein kinase PCTAIRE-1 and its possible role in neurite outgrowth in Neuro-2A cells. <i>J Cell Sci.</i> 2002 Sep 1;115(Pt 17):3479-90.<br/> Le Bouffant F, Capdevielle J, Guillemot JC, Sladeczek F. Characterization of brain PCTAIRE-1 kinase immunoreactivity and its interactions with p11 and 14-3-3 proteins. <i>Eur J Biochem.</i> 1998 Oct 1;257(1):112-20.<br/> Sladeczek F, Camonis JH, Burnol AF, Le Bouffant F. The Cdk-like protein PCTAIRE-1 from mouse brain associates with p11 and 14-3-3 proteins. <i>Mol Gen Genet.</i> 1997 May 20;254(5):571-7.</p> |  |
| <p><b>Human PDC</b> Phosducin (Swissprot = P20941)</p> <p>1 MEEAKSQSLE EDFEQATH T GPKGVINDWR KFKLESQSDS SIPPSKKEIL RQMS SPQSRN<br/> 61 GKDSKERVSR KMSIQEYELI HKEKEDENCL RKYRRQCMQD MHQKLSFGPR YGFVYELETG<br/> 121 KQFLETIEKE LKITTIVVHI YEDGKGCDA LNSSLTCLAA EYPIVKFCKI KASNTGAGDR<br/> 181 FSLDVLPTLL IYKGGELISN FISVAEQFAE EFFAGDVESF LNEYGLLPER EVHVLEHTKI<br/> 241 EEDVE</p> <p>&gt;gi 130134 sp P20941.1 PHOS_HUMAN RecName: Full=Phosducin; Short=PHD; AltName: Full=33 kDa phototransducing protein; AltName: Full=MEKA protein MEEAKSQSLEEDFEQATH T GPKGVINDWRKFKLESQSDS SIPPSKKEILRQMS SPQSRNGKDSKERVSR KMSIQEYELIHKEKEDENCLRKYRRQCMQDMHQKLSFGPRYGFVYELETGKQFLETIEKELKITTIVVHI YEDGKGCDA LNSSLTCLAAEYPIVKFCKI KASNTGAGDRFSLDVLPTLLIYKGGELISNFISVAEQFAE EFFAGDVESFLNEYGLLPEREVHVLEHTKIEEDVE</p> <p><b>Notes</b><br/> Phosducin may participate in the regulation of visual phototransduction or in the integration of photoreceptor metabolism.<br/> phospho-Pd is found to interact with 14-3-3 in material from dark-adapted retina, and this interaction is markedly</p>                                                                                                                                                                                                                                                                                                                                                                                                                                                                                                                                                                                                                                                                                                                                                                                                                                                                                                                                                                                                                                                                                                                                                                                   |  |

diminished by light, which dephosphorylates Pd. Pd phosphorylation by Ca(2+)/calmodulin-dependent kinase II at Ser-54 and Ser-73 led to binding of the phosphoserine-binding protein 14-3-3 (Thulin et al 2001).

**References to 14-3-3 binding to phosducin**

Nakano K, Chen J, Tarr GE, Yoshida T, Flynn JM, Bitensky MW. Rethinking the role of phosducin: light-regulated binding of phosducin to 14-3-3 in rod inner segments. Proc Natl Acad Sci U S A. 2001 Apr 10;98(8):4693-8. Epub 2001 Apr 3

Thulin CD, Savage JR, McLaughlin JN, Truscott SM, Old WM, Ahn NG, Resing KA, Hamm HE, Bitensky MW, Willardson BM. Modulation of the G protein regulator phosducin by Ca2+/calmodulin-dependent protein kinase II phosphorylation and 14-3-3 protein binding. J Biol Chem. 2001 Jun 29;276(26):23805-15.

**Human PDE3A** Phosphodiesterase 3A (Swissprot = Q14432)

1 MAVPGDAARV RDKPVHSGVS QAPTAGRDC HHRADPASPRD SGCRCGWGDL VLQPLRSSRK  
61 LSSALCAGSL SFLALLVRL VRGEVGDLE QCKEAAAAEE EEAAPGAEGG VFPGRGGAP  
121 GGGARLSPWL QPSALLFSL CAFFWMGLYL LRAGVRLPLA VALLAACCGG EALVQIGLV  
181 GEDHLLSLPA AGVVLSCLA ATWLVLRLRL GVLMIALTA VRTVSLISLE RFKVAWRPYL  
241 AYLAVGLGIL LARYVEQILP QSAEAPREH LGSQLIAGTK EDIPVFKRRR RSSSVSAEM  
301 SGCSKSHRR TSLPCIPREQ LMGHSEWDHK RGRGSGSSG TSITVDIAVM GEAGHLITDL  
361 LADPSLPPNV CTSLRAVSNL LSTQLTFQAI HKPRVNPVTS LSENYTCSDS EESSEKDKLA  
421 IPKRLRRSLP PGLLRVSSST WTTTTSATGL PTLPEPVRDR STSIKLE APSSSPDSWN  
481 NPVMMTLTKS RSFTSSYAIS AANHVKAKKQ SRPGALAKIS PLSSPCSSPL QGTPASSLV  
541 KISAVQFPES ADTTAKQSLG SHRALTYTQS APDLSPQILT PPVICSSCGR PYSQGNPADE  
601 PLERSGVATR TPSRTDDTAQ VTSYETNNN SDSSDIVQNE DETECLREPL RKASACSTYA  
661 PETMFLDKP ILAPEPLVMD NLDIMEQLN TWNFPIDLV ENIGRKCGR ILSQVSYRLF  
721 DMGLFEAFKI PIREFMNYFH ALEIGYRDIP YHNRIHATDV LHAVWYLTQ PIPGLSTVIN  
781 DHGSTSDSDS DSGFTHGMG YVFSKTYNVT DDKYGCLSGN IPALELMALY VAAAMHDYDH  
841 PGRTNAFLVA TSAPQAVLYN DRSVLENHHA AAANLMSR PEYNFLINLD HVEFKHFRFL  
901 VIEAILATDL KKHDFVAKF NGKVNDDVGI DWTNENDRL LVCQMCIKLAD INGPACCKEL  
961 HLQWTDGIVN EFYEQGDEEA SLGLPISPFM DRSAQLANL QESFISHIV PLCNSYDSAG  
1021 LMPGKWVEDS DESGTDDEPE EEEEEAPAPN EETCENNES PKKTFKRRK IYQITQHL  
1081 QNHKMWKVI EEEQRLAGIE NQSLDQTPQS HSSEIQAIK EEEEEKGRPR GEEIPTQKPD  
1141 Q

>gi|47117888|sp|Q14432.3|PDE3A\_HUMAN RecName: Full=cGMP-inhibited 3',5'-cyclic phosphodiesterase A; AltName: Full=Cyclic GMP-inhibited phosphodiesterase A; Short=CGI-PDE A

MAVPGDAARV RDKPVHSGVS QAPTAGRDC HHRADPASPRD SGCRCGWGDL VLQPLRSSRK LSSALCAGSL SFLALLVRL VRGEVGDLE QCKEAAAAEE EEAAPGAEGG VFPGRGGAP GGGARLSPWL QPSALLFSL CAFFWMGLY LLRAGVRLPLA VALLAACCGG EALVQIGLV GEDHLLSLPA AGVVLSCLA AATWLVLRLRL GVLMIALTA VRTVSLISLE RFKVAWRPYL AYLAVGLGIL LARYVEQILP QSAEAPREH LGSQLIAGTK EDIPVFKRRR RSSSVSAEM MSGCSKSHRR TSLPCIPREQ LMGHSEWDHK RGRGSGSSG TSITVDIAVM GEAGHLITDL LADPSLPPNV CTSLRAVSNL LSTQLTFQAI HKPRVNPVTS LSENYTCSDS EESSEKDKLA IPKRLRRSLP PGLLRVSSST WTTTTSATGL PTLPEPVRDR STSIKLE APSSSPDSWN NPVMMTLTKS RSFTSSYAIS AANHVKAKKQ SRPGALAKIS PLSSPCSSPL QGTPASSLV SKISAVQFPES ADTTAKQSLG SHRALTYTQS APDLSPQILT PPVICSSCGR PYSQGNPADE PLERSGVATR TPSRTDDTAQ VTSYETNNN SDSSDIVQNE DETECLREPL RKASACSTYAPETMFLDKP ILAPEPLVMD NLDIMEQLN TWNFPIDLV ENIGRKCGR ILSQVSYRLF DMGLFEAFKI PIREFMNYFH ALEIGYRDIP YHNRIHATDV LHAVWYLTQ PIPGLSTVIN DHGSTSDSDS DSGFTHGMG YVFSKTYNVT DDKYGCLSGN IPALELMALY VAAAMHDYDH PGRTNAFLVA TSAPQAVLYN DRSVLENHHA AAANLMSR PEYNFLINLD HVEFKHFRFL VIEAILATDL KKHDFVAKF NGKVNDDVGI DWTNENDRL LVCQMCIKLAD INGPACCKEL HLQWTDGIVN EFYEQGDEEA SLGLPISPFM DRSAQLANL QESFISHIV PLCNSYDSAG SLGLPISPFM DRSAQLANL QESFISHIV PLCNSYDSAG LMPGKWVEDS DESGTDDEPE EEEEEAPAPN EETCENNES PKKTFKRRK IYQITQHL QNHKMWKVI EEEQRLAGIE NQSLDQTPQS HSSEIQAIK EEEEEKGRPR GEEIPTQKPD

**Notes**

PDE3A hydrolyzes both cyclic AMP (cAMP) and is inhibited by cyclic GMP (cGMP).

Ser428 was selectively phosphorylated in response to PMA and dephosphorylated in cells treated with aphidicolin and mimosine. Phosphorylation of Ser428 therefore correlated with 14-3-3 binding to PDE3A (Pozuelo Rubio et al 2005).

Platelet activation also led to a PKC-dependent association between PDE3A and 14-3-3 proteins. In contrast, cAMP-elevating agents such as PGE(1) and forskolin-induced phosphorylation of Ser(312) and increased PDE3A activity, but did not stimulate 14-3-3 binding (Hunter et al 2009).

**References to 14-3-3 binding to PRAS40**

**Pozuelo Rubio M**, phosphodiesterase 3A binds to 14-3-3 proteins in response to PMA-induced phosphorylation of Ser428. Biochem J. 2005 Nov 15;392(Pt 1):163-72

**Hunter RW**, Protein kinase C-mediated phosphorylation and activation of PDE3A regulate cAMP levels in human platelets. J Biol Chem. 2009 May 1;284(18):12339-48. Epub 2009 Mar 4

**Human PFKFB2** cardiac PFK-2 6-phosphofructo-2-kinase/fructose-2,6-biphosphatase 2 (Swissprot = O60825)

1 MSGASSSEQN NNSYETKTPN LRMSEKKCSW ASYMTNSPTL IVMIGLPARG KTYVSKKLTR  
61 YLNWIGVPTK VFNLGVYRRE AVKSYKSYDF FRHDNEEAMK IRKQCALVAL EDVKAYLTEE  
121 NGQIAVFDAT NTRRERDMI LNFAEQNSFK VFFVESVCD D PVIAANILE VKVSSPDYPE  
181 RNRENVMEF LKRIECYKVT YRPLDPNDY KDLSEFIKVN VGRFLVNRV QDIYQSKIVY  
241 YLMNIHVQPR TIYLCRHGES EFNLLGKIGG DSGLSVRGKQ FAQALRKFL E QEITDLKVV  
301 TSQLKRTIQT AESLGVPEYQ WKILNEIDAG VCEEMTYAEI EKRYPEEFAL RDQEKYLRY  
361 PGGESYQDLV QRLEPVIMEL ERQGNVLVIS HQAVMRCLLA YFLDKGADEL PYLRCPLHTI  
421 FKLTPVAYGC KVETIKLNVE AVNTRDKPT NNFKNQTPV RMRNRSFTPL SSSNTIRRP  
481 NYSVGSRPLK PLSPLRAQDM QEGAD

>gi|12643333|sp|O60825.2|PF262\_HUMAN RecName: Full=6-phosphofructo-2-kinase/fructose-2,6-biphosphatase 2; AltName: Full=PFK-2/FBPase-2; AltName: Full=6PF-2-K/Fru-2,6-P2ASE heart-type isozyme; Includes: RecName: Full=6-phosphofructo-2-kinase; Includes: RecName: Full=Fructose-2,6-bisphosphatase

|                                                                                                                                                                                                                                                                                                                                                                                                                                                                                                                                                                                                                                                                                                                                                                                                                                                                                                                                                                                                                                                                                                                                                                                                                                                                                                                                                                                                                                                                                                                                                                                                                                                                                                                                                                                                                                                                                                                                                                                                                                                                                                                                                                                                                                                                                                                                                                                                                                                                                                                                                                                                                                                                        |                                                      |
|------------------------------------------------------------------------------------------------------------------------------------------------------------------------------------------------------------------------------------------------------------------------------------------------------------------------------------------------------------------------------------------------------------------------------------------------------------------------------------------------------------------------------------------------------------------------------------------------------------------------------------------------------------------------------------------------------------------------------------------------------------------------------------------------------------------------------------------------------------------------------------------------------------------------------------------------------------------------------------------------------------------------------------------------------------------------------------------------------------------------------------------------------------------------------------------------------------------------------------------------------------------------------------------------------------------------------------------------------------------------------------------------------------------------------------------------------------------------------------------------------------------------------------------------------------------------------------------------------------------------------------------------------------------------------------------------------------------------------------------------------------------------------------------------------------------------------------------------------------------------------------------------------------------------------------------------------------------------------------------------------------------------------------------------------------------------------------------------------------------------------------------------------------------------------------------------------------------------------------------------------------------------------------------------------------------------------------------------------------------------------------------------------------------------------------------------------------------------------------------------------------------------------------------------------------------------------------------------------------------------------------------------------------------------|------------------------------------------------------|
| <p>MSGASSEQNNSYETKTPNLRMSEKCKSWASYMTNSPTLIVMIGLPARGKTYVSKKLTRYLNWIGVPTK<br/>VFNLGVYRREAVKSYKSYDFFRHDNEEAMKIRKQCALVALEDVKAYLTEENGQIAVFDATNTTRERRDMI<br/>LNFAEQNSFKVFFVEVCDDPVDVIAANILEVVKVSSPDYPERNRENVEDFLKRIEYKVTYRPLDPDNYD<br/>KDLSFKIVNVGQRFVLVNRVQDYIQSKIVYYLMNIHVQPRTIYLCHRGESEFNLLGKIGGDSGLSVRGKQ<br/>FAQALRKFLLEEQETDLKVVTSQKRTIQTAEVSLGVPYEQWKILNEIDAGVCEEMTYAEIEKRYPEEFAL<br/>RDQEKYLYRYPGGESYQDLVQRLEPVMELERQGNVLIHQAVMRCLLAYFLDKGADLPYLRCPPLHTI<br/>FKLTPVAYGCKVETIKLNVEAVNTHRDKPTNFPKNQTPVRMRRNSFTPLSSSNTIRRPYNSVGSRLPK<br/>PLSPLRAQDMQEGAD</p> <p><b>Notes</b><br/>PKB-dependent binding of 14-3-3s to phospho-Ser483 of cardiac PFK-2 mediates the stimulation of glycolysis by growth factor.</p> <p><b>References to 14-3-3 binding to cardiac PFK-2</b><br/>Pozuelo Rubio M, Peggie M, Wong BH, Morrice N, MacKintosh C. 14-3-3s regulate fructose-2,6-bisphosphate levels by binding to PKB-phosphorylated cardiac fructose-2,6-bisphosphate kinase/phosphatase. EMBO J. 2003 Jul 15;22(14):3514-23.</p>                                                                                                                                                                                                                                                                                                                                                                                                                                                                                                                                                                                                                                                                                                                                                                                                                                                                                                                                                                                                                                                                                                                                                                                                                                                                                                                                                                                                                                                                                                                                                                                                                                             |                                                      |
| <p><b>Human PHB (Prohibitin)</b> (Swissprot = P35232)<br/>1 MAAKFVESIG KFGALAVAG GVVNSALYV DAGHRAVIFD RFRGVQDIVV GEGTHFLIPW<br/>61 VQKPIIFDCR SRPRNVPIVIT GSKDLQNVNI TLRILFRPVA SQLPRIFTSI GEDYDERVLP<br/>121 SITTEILKSV VARFDAGELI TQRELVSQRV SDDLTERAAT FGLILDDVSL THLTFGKEFT<br/>181 EAVEAKQVAQ QEAERARFVV EKAEQKKAA IISAEGDSKA AELIANSLAT AGDGLIELRK<br/>241 LEAAEDIAYQ LSRSRNITYL PAGQSVLLQL PQ<br/>&gt;gi 464371 sp P35232.1 PHB_HUMAN RecName: Full=Prohibitin<br/>MAAKVFESIGKFGALAVAGGVVNSALYVNDAGHRAVIFDRFRGVQDIVVGEHTFLIPWVQKPIIFDCR<br/>SRPRNVPIVITGSKDLQNVNITLRILFRPVASQLPRIFTSIGEDYDERVLPSTTEILKSVARFDAGELI<br/>TQRELVSQRVSDDLTERAATFGLILDDVSLTHLTFGKEFTEAVEAKQVAQQAERARFVVEKAEQKKAA<br/>IISAEGDSKAAELIANSLATAGDGLIELRLEAAEDIAYQLSRSRNITYLPAGQSVLLQLPQ</p> <p><b>Notes</b><br/><b>References to 14-3-3 binding to prohibitin</b><br/>Zhu B, Zhai J, Zhu H, Kyprianou N. Prohibitin regulates TGF-beta induced apoptosis as a downstream effector of smad-dependent and -independent signaling. Prostate. 2009 Sep 1. [Epub ahead of print]</p>                                                                                                                                                                                                                                                                                                                                                                                                                                                                                                                                                                                                                                                                                                                                                                                                                                                                                                                                                                                                                                                                                                                                                                                                                                                                                                                                                                                                                                                                                                                                                                                                            | <p>BINDING SITES<br/>UNKNOWN<br/>NOT IN WEBLOGO.</p> |
| <p><b>Human PI4KB (PI4KIIIbeta)</b> phosphatidylinositol 4-kinase III beta (Swissprot = Q9UBF8)<br/>1 MGDTVVEPAP LKPTSEPTSG PPGNNGSLL SVITEGVGEL SVIDPEVAQK ACQEVLEKVK<br/>61 LLHGGVAVSS RGTPLELVNG DGVDSEIRCL DDPPAQIREE EDEMGAAVS GTAKGARRRR<br/>121 QNNSAKQSWL LRLFESKLF D ISMAISYLYN SKEPGVQAYI GNRLFCFRNE DVDFYLPQLL<br/>181 NMYIHMDDEDV GDAIKPYIVH RCRQSINFSL QCALLLGAYS SDMHISTQRH SRGTKLRKLI<br/>241 LSDELKPAHR KRELPSLSPA PDTGLSPSKR THQRSKSDAT ASISLSSNLK RTANPKVEN<br/>301 EDEELSSSTE SIDNSFSSPV RLAPEREFIK SLMAIGKRLA TLPTKEQKTO RLISELSLLN<br/>361 HKLPAVWLP TAGFDHVVVR VPHTQAVVLN SKDKAPYLIY VEVLECFNFD TTSVPAIPE<br/>421 NRIRSTRSVE NLPECGITHE QRAGSFSTVP NYDNDDEAWS VDDIGELQVE LPEVHTNSCD<br/>481 NISQFSVDSI TSQESKEPVF IAAGDIRRL SEQLAHTPTA FKRPDPESA VALKEPWQEK<br/>541 VVIRIREGSPY GHLPNWRLLS VIVKCGDDL RQELLAFQVLK QLSIWEQER VPLWIKPKYKI<br/>601 LVISADSGMI EPVNAVSIH QVKKQSQLS LDYFLQEHGS YTTEAFLSAQ RNFVQSCAGY<br/>661 CLVCYLLQVK DRHNGNILLD AEGHIIHIDF GFILSSSPRN LGFETSFAFKL TTEFVDMGG<br/>721 LDGDMFNYYK MMLQGLIAA RKHMMDKVVQI VEIMQGSQQL PCFHGSSTIR NLKERFHMSM<br/>781 TEEQLQLLVE QMVDGSMRSI TTKLYDGFQY LTNGIM<br/>&gt;gi 38372507 sp Q9UBF8.1 PI4KB_HUMAN RecName: Full=Phosphatidylinositol 4-<br/>kinase beta; Short=PtdIns 4-kinase beta; Short=PI4K-beta; Short=PI4Kbeta;<br/>AltName: Full=NPIK; AltName: Full=PI4K92<br/>MGDTVVEPAPLKPTSEPTSGPPGNNGSLLSVITEGVGELSVIDPEVAQKACQEVLEKVKLLHGGVAVSS<br/>RGTPLELVNGDGVDSEIRCLDDPPAQIREEDEMGAAVASGTAKGARRRRQNNSAKQSWLLRLFESKLF<br/>ISMAISYLYNSKEPGVQAYIGNRLFCFRNEVDVDFYLPQLLNMYIHMDDEDVDAIKPYIVHRCRQSINFSL<br/>QCALLLGAYSSDMHISTQRHSRGTCLRKLI LSDELKPAHRKRELPSLSPADTGLSPSKRTHQRSKSDAT<br/>ASISLSSNLKRTANPKVENDEELSSSTESIDNSFSSPVRLAPEREFIKSLMAIGKRLATLPTKEQKTO<br/>RLISELSLLNHKLPARVWLP TAGFDHVVVRVPHTQAVVLNSKDKAPYLIYVEVLECFNFD TTSVPAIPE<br/>NRIRSTRSVENLPECGITHEQRAGSFSTVPNYDNDDEAWSVDDIGELQVELPEVHTNSCDNISQFSVDSI<br/>TSQESKEPVFIAAGDIRRLSEQLAHTPTAFKRPDPESAVALKEPWQEKVIRIREGSPYGHLPNWRLLS<br/>VIVKCGDDL RQELLAFQVLKQLSIWEQERVPLWIKPKYKILVISADSGMIEPVNAVSIHQVKKQSQLS<br/>LDYFLQEHGSYTTEAFLSAQRFVQSCAGYCLVCYLLQVKDRHNGNILLDAEGHIIHIDFGFILSSSPRN<br/>LGFETSFAFKLTTEFVDMGGLDGDMFNYYKMLMLQGLIAARKHMMDKVVQIVEIMQGSQQLPCFHGSSTIR<br/>NLKERFHMSMTEEQLQLLVEQMVDGSMRSITTKLYDGFQYLTNGIM</p> <p><b>Notes</b><br/>Human PI4Kbeta 288 – LKRTA(pS)NP-297 (Ser294)<br/><b>References to 14-3-3 binding to PI4KIIIbeta</b><br/>Hausser A, Link G, Hoene M, Russo C, Selchow O, Pfizenmaier K. Phospho-specific binding of 14-3-3 proteins to phosphatidylinositol 4-kinase III beta protects from dephosphorylation and stabilizes lipid kinase activity. J Cell Sci. 2006 Sep 1;119(Pt 17):3613-21.</p> |                                                      |
| <p><b>Human PKP2</b> Plakophilin 2 (Swissprot = Q99959)<br/>1 MAAPGAPAEY GYIRTVLGQQ ILGQLDSSSL ALPSEAKLKL AGSSGRGGQT VKSLRIQEQV<br/>61 QOTLARKGRS SVGNLNLHRT S VPEYVYNI HLVENDFVGG RSPVPKTYDM LKAGTTATYE<br/>121 GRWGRGTAQY SSQSVEERS LRHPLRLEI SPDSSPERAH YTHSDYQYSQ RSQAGHTLHH<br/>181 QESRRAALLV PPRYARSEIV GVSRAQTTS QRHFDTYHRQ YQHGVSVDTV FDSIPANPAL<br/>241 LTYPRPFTSR SMGNLLEKEN YLTAGLTVGQ VRPLVPLQPV TQNRASRSSW HQSSFHSTRT<br/>301 LREAGPSVAV DSSGRRALHT VGQAAAGGSG NLLTERSTFT DSQIGNADME MTLERAVSML<br/>361 EADHMPSPRI SAAATFIQHE CFQKSEARR VNQLRGIKLL LQLLKVQND VQRVAAGCALR<br/>421 NLVFDENDNK LEVAELNGVP RLLQVLKQTR DLETQKQITD HTVNLRSRNG WPGAVAHACN<br/>481 PSTLGGQGG ITRSGVRDQP DQHGLLWNLS SNDKLNMI TEALLTLTEN IIPFSGWPE</p>                                                                                                                                                                                                                                                                                                                                                                                                                                                                                                                                                                                                                                                                                                                                                                                                                                                                                                                                                                                                                                                                                                                                                                                                                                                                                                                                                                                                                                                                                                                                                                                                                                                                                                                                                                                                                                                                                                                             |                                                      |

|                                                                                                                                                                                                                                                                                                                                                                                                                                                                                                                                                                                                                                                                                                                                                                                                                                                                                                                                                                                                                                                                                                                                                                                                                                                                                                                                                                                                                                                                                                                                                                                                                                                                                                                                                                                                                                                                                                                                                                                                                                                                                                                                                                                                                                                                                                                                                                                                                                                                                                                                                                                           |                 |
|-------------------------------------------------------------------------------------------------------------------------------------------------------------------------------------------------------------------------------------------------------------------------------------------------------------------------------------------------------------------------------------------------------------------------------------------------------------------------------------------------------------------------------------------------------------------------------------------------------------------------------------------------------------------------------------------------------------------------------------------------------------------------------------------------------------------------------------------------------------------------------------------------------------------------------------------------------------------------------------------------------------------------------------------------------------------------------------------------------------------------------------------------------------------------------------------------------------------------------------------------------------------------------------------------------------------------------------------------------------------------------------------------------------------------------------------------------------------------------------------------------------------------------------------------------------------------------------------------------------------------------------------------------------------------------------------------------------------------------------------------------------------------------------------------------------------------------------------------------------------------------------------------------------------------------------------------------------------------------------------------------------------------------------------------------------------------------------------------------------------------------------------------------------------------------------------------------------------------------------------------------------------------------------------------------------------------------------------------------------------------------------------------------------------------------------------------------------------------------------------------------------------------------------------------------------------------------------------|-----------------|
| <p>541 GDYPKANGLL DFDIFYNVTG CLRNMS SAGA DGRKAMRRCD GLIDSLVHYV RGTIADYQPD<br/> 601 DKATENCVCVI LHNLSYQLEA ELPEKYSQNI YIQNRNIQTD NNSIGCFGS RSRKVKQYQ<br/> 661 DVPMPPEEKS PKGVEWLWHS IVIRMYLSLI AKSVRNYTQE ASLGALQNLT AGSGMPMPTSV<br/> 721 AQTVVQKESG LQHTRKMLHV GDPSVKKTAI SLLRNLSRNL SLQNEIAKET LPDLVSIIPD<br/> 781 TVPSTDLLIE TTASACYTLN NIIQNSYQNA RDLNLTGGIQ KIMASAGDA YASNKASKAA<br/> 841 SVLLYSYLWHA TELHHAYKKA QFKKTDVFN S RTAKAYHSLK D</p> <p>&gt;gi 20139105 sp Q99959.1 PKP2_HUMAN RecName: Full=Plakophilin-2<br/> MAAPGAPAEYGYIRTVLGGQILGQLDSSSLALPSEAKLKLKLAGSSGRGGQTVKSLRIQEQQVQQTTLARKGRS<br/> SVGNLHRTSSVPEYVYNLHLVENDFVGGRSVPKTYDMLKAGTTATYEGRWGRGTAQYSSQKSVEERS<br/> LRHPLRRLTISPSSPERAHYTHSDYQYSQRSQAGHTLHHQESRRAALLVPPRYARSEIVGVSRAQTTSR<br/> QRHFDTYHRQYQHGVSVDTFVDSIPANPALTYPRPGTSRSMGNLLEKENYLTAGLTVGQVRPLVPLQPV<br/> TQNRASRSWQHSSFHSTRTLREAGPSVAVDSSGRRAHLTVGQAAAGSGNLLTERSTFTDSQLGNADME<br/> MTLERAVSMLEADHMPSPRI SAAATFIQHECFQKSEARKRVNQLRGLKLLQLLKVQNEDEVQRAVCGALR<br/> NLVFEEDNDNKLVEALNGVPRLLQVLKQTRDLETKKQITDHTVNLRSRNGWPGAVAHACNPSTLGGQGG<br/> ITRSGVRDQPDQHGLLWNLSSNDKLNLMITEALLTLTENI IIPFSGWPEGDYPKANGLLDFIDIFYNVTG<br/> CLRNMS SAGADGRKAMRRCDGLIDSLVHYV RGTIADYQPD DKATENCVC I LHNLSYQLEAELPEKYSQNI<br/> YIQNRNIQTDNNSIGCFGSRSRKVKQYQDVPMPPEEKS NPKGVEWLWHS IVIRMYLSLIAKSVRNYTQE<br/> ASLGALQNLTAGSGMPMPTSV AQTVVQKESGLQHTRKMLHVGDPSVKKTAI SLLRNLSRNL SLQNEIAKET<br/> LPDLVSIIPDTVPSTDLLIETTASACYTLN NIIQNSYQNA RDLNLTGGIQ KIMASAGDA YASNKASKAA<br/> SVLLYSYLWHA TELHHAYKKA QFKKTDVFN S RTAKAYHSLK D</p> <p><b>Notes</b><br/> Belongs to the beta-catenin family and contains 8 armadillo repeats. May play a role in junctional plaques.<br/> Phosphorylation of PKP2 by C-TAK1 also generates a 14-3-3-binding site that influences PKP2 localization.<br/> These findings underscore the importance of C-TAK1 as a regulator of 14-3-3 binding and protein localization. this<br/> interaction could be disrupted by mutations that either destroy the S82 site (S82A) or severely reduce its<br/> phosphorylation (V87A), confirming that S82 is a functional 14-3-3-binding site.<br/> Defects in PKP2 are the cause of familial arrhythmogenic right ventricular dysplasia 9 (ARVD9) [MIM:609040];<br/> also known as arrhythmogenic right ventricular cardiomyopathy 9 (ARVC9).</p> <p><b>References to 14-3-3 binding to plakophilin 2</b><br/> Müller J, Ritt DA, Copeland TD, Morrison DK. Functional analysis of C-TAK1 substrate binding and<br/> identification of PKP2 as a new C-TAK1 substrate. EMBO J. 2003 Sep 1;22(17):4431-42.</p> |                 |
| <p><b>Human PMCA1, 3 and 4</b> (Plasma membrane Ca<sup>2+</sup>-ATPases)</p> <p><b>Notes</b><br/> TKLKTSPNEGL in PMCA1 (J04027)<br/> RRLKTSPVEGL in PMCA2 (M97260) but this isoform did not bind to 14-3-3<br/> RRLKTSPTEGL in PMCA3 (Q16720)<br/> SRLKTSPVEGL in PMCA4 (M25874)</p> <p><b>References to 14-3-3 binding to PMCA1, PMCA3 and PMCA4</b><br/> Linde CI, Di Leva F, Domi T, Tosatto SC, Brini M, Carafoli E. Inhibitory interaction of the 14-3-3 proteins with<br/> ubiquitous (PMCA1) and tissue-specific (PMCA3) isoforms of the plasma membrane Ca<sup>2+</sup> pump. Cell Calcium.<br/> 2008 Jun;43(6):550-61.<br/> Rimessi A, Coletto L, Pinton P, Rizzuto R, Brini M, Carafoli E. Inhibitory interaction of the 14-3-3{epsilon}<br/> protein with isoform 4 of the plasma membrane Ca(2+)-ATPase pump. J Biol Chem. 2005 Nov 4;280(44):37195-<br/> 203.<br/> Domi T, Di Leva F, Fedrizzi L, Rimessi A, Brini M. Functional specificity of PMCA isoforms? Ann N Y Acad<br/> Sci. 2007 Mar;1099:237-46.</p>                                                                                                                                                                                                                                                                                                                                                                                                                                                                                                                                                                                                                                                                                                                                                                                                                                                                                                                                                                                                                                                                                                                                                                                                                                                                                                                                                                                                                                                                                                                                                              | NOT IN WEBLOGO. |
| <p><b>Human PPP1R12A</b> (Swissprot = O14974)</p> <p>1 MKMADAKQKR NEQLKRWIGS ETDLEPPVVK RQKTKVKFDD GAVFLAACSS GDTDEVLLKLL<br/> 61 HRGADINYAN VDGLTALHQA CIDDNDVMVK FLVENGANIN QPDNEGWIPL HAAASCGYLD<br/> 121 IAEFLLIGQGA HVGAVNSEGD TPLDIAEESA MEELLQNEVN RQGVDI EAAR KEEERIMLRD<br/> 181 ARQWLNLSGHI NDVVRHAKSGG TALHVA AAKG YTEVLKLLIQ AGYDVNIKDY DGWTPHAAA<br/> 241 HWGKEEACRI LVDNLCMEM VNKVQGTA FD VADEDILGYL EELQKQNLH HSEKRDKKS<br/> 301 LIESTANMDN NQSQKTFKKN ETLIEPEKN ASRIESLEQE KVDEEEEGKK DESSCSSEED<br/> 361 EEDDSESEAE TDKTKPLASV TNANTSSTQA APVAVTPTV SSGQATPTSP IKKFPPTATK<br/> 421 ISPKEERKDE SPATWRLGL RKTGSYGALA EITASKEGQK EKDTAGVTRS ASSPRLSSSL<br/> 481 DNKEKEKDSK GTRLAYVAPT IPRRLASTSD IEKENRDS S LRTSSSYTR RKWEDDLKKN<br/> 541 SSVNEGSTYH KSCSFGRRQD DLISSSVPST TSTPTVTSAA GLQKSLLSST STTKITGTS<br/> 601 SSAGTQSSST NRLWAEDSTE KEKDSVPTAV TIPVAVTAVN AAASSTTLTT TTAGTVSSTT<br/> 661 EVRERRRSYL TPVRDEESES QRKARSQAR QSRSTQGV TLDLQEA EKT IGRSRSTRTR<br/> 721 EQNEEKEKE EKEKQDKQK EKEKESR EDEYKQKYSR TYDETYQRYR PVSTSSSTTP<br/> 781 SSSLSTMSS LYASSQLNRP NSLVGITSAY SRGITKENER EGEKREEEKE GEDKSQPKSI<br/> 841 RRRRRPREKR RSTGVFWTQ DSDENEQEQ SDTEEGSNKK ETQTD SISR Y ETSSTSAGDR<br/> 901 YDSSLGRSGS YSYLEERKPY SSRLEKDDST DFKKLYEQIL AENEKKAQL HDTNMELTDL<br/> 961 KLQLEKATQR QERFADRSL EMEKRERRAL ERRISEMEEE LKMLPDLKAD NQRLKDENGA<br/> 1021 LIRVISKLSK</p> <p>&gt;gi 41017262 sp O14974.1 MYPT1_HUMAN RecName: Full=Protein phosphatase 1<br/> regulatory subunit 12A; AltName: Full=Myosin phosphatase-targeting subunit 1;<br/> AltName: Full=Myosin phosphatase target subunit 1; AltName: Full=Protein<br/> phosphatase myosin-binding subunit<br/> MKMADAKQKRNEQLKRWIGSETDLEPPVVKRQKTKVKFDDGAVFLAACSSGDTDEVLLKLLHRGADINYAN<br/> VDGLTALHQA CIDDNDVMVKFLVENGANINQPDNEGWIPLHAAASCGYLDIAEFLLIGQGAHVGAVNSEGD<br/> TPLDIAEESA MEELLQNEVNRQGVDI EAARKEEERIMLRDARQWLNLSGHI NDVVRHAKSGGTALHVA AAKG<br/> YTEVLKLLIQAGYDVNIKDYDGWTPHAAAHWGKEEACRI LVDNLCMEMV NKVQGTA FDVADEDILGYL<br/> EELQKQNLH HSEKRDKKS PLIESTANMDN NQSQKTFKKN ETLIEPEKNASRIESLEQEKVDEEEEGKK<br/> DESSCSSEED EEDDSESEAE TDKTKPLASV TNANTSSTQA APVAVTPTV SSGQATPTSP IKKFPPTATK<br/> ISPKEERKDE SPATWRLGLRKTGSYGALAEITASKEGQK EKDTAGVTRS ASSPRLSSSLDNKEKEKDSK</p>                                                                                                                                                                                                                                                                                                                                   |                 |



|                                                                                                                                                                                                                                                                                                                                                                                                                                                                                                                                                                                                                                                                                                                                                                                                                                                                                                                                                                                                                                                                                                                                                                                                                                                                                                                                                                                                                                                                                                                                                                                                                                                                                                                                                                                                                                                                                                                                                                                                                                                                                                                                                                                                                                                                                                                                                                                                                                                                                                                                                                                                                                                                                                                                                                                                                                                                                                                                                                                                                                                                                                                                                                                                                                                                                                                                                                                                                                                                                                                                                                                                                                                                                                                                                                                                                                                                                                       |  |
|-------------------------------------------------------------------------------------------------------------------------------------------------------------------------------------------------------------------------------------------------------------------------------------------------------------------------------------------------------------------------------------------------------------------------------------------------------------------------------------------------------------------------------------------------------------------------------------------------------------------------------------------------------------------------------------------------------------------------------------------------------------------------------------------------------------------------------------------------------------------------------------------------------------------------------------------------------------------------------------------------------------------------------------------------------------------------------------------------------------------------------------------------------------------------------------------------------------------------------------------------------------------------------------------------------------------------------------------------------------------------------------------------------------------------------------------------------------------------------------------------------------------------------------------------------------------------------------------------------------------------------------------------------------------------------------------------------------------------------------------------------------------------------------------------------------------------------------------------------------------------------------------------------------------------------------------------------------------------------------------------------------------------------------------------------------------------------------------------------------------------------------------------------------------------------------------------------------------------------------------------------------------------------------------------------------------------------------------------------------------------------------------------------------------------------------------------------------------------------------------------------------------------------------------------------------------------------------------------------------------------------------------------------------------------------------------------------------------------------------------------------------------------------------------------------------------------------------------------------------------------------------------------------------------------------------------------------------------------------------------------------------------------------------------------------------------------------------------------------------------------------------------------------------------------------------------------------------------------------------------------------------------------------------------------------------------------------------------------------------------------------------------------------------------------------------------------------------------------------------------------------------------------------------------------------------------------------------------------------------------------------------------------------------------------------------------------------------------------------------------------------------------------------------------------------------------------------------------------------------------------------------------------------|--|
| <p>GTRLAYVAPTI PRRLASTSDIEEKENRDRSSSLRTSSSYTRRKKWEDDLKKNSSVNEGSTYHKSCSFGRRQD<br/>DLISSVSPSTTPTVTSAAGLQKSLSSSTSTTKITTTGSSSAGTQSSTSNRLWAEDSTEKEKDSVPTAV<br/>TIPVAPTIVNAAASTTLLTTTAGTVSSTTEVRRRRSYLTPVRDEESESQRKARSQARQSRSTQGT<br/>LTDLQEAKEKTI GRSTRTRTEQENEKEKEKEKEKQDKEKQEEKKESETSREDEYKQKYSRTYDEYQRYR<br/>PVSTSSSTPSSSLSTMSSSLYASSQLNRPNLSVIGITSAYSRGITKENEREGEKREEEKEGEDKSKQPKSI<br/>RERRRPREKRSTGVSFWTQSDSENEQEQQSDTEEGSNKKTQTDSISRYSSTTSAGDRYDSSLGRSGS<br/>YSYLEERKPYSSRLEKDDSTDFKFLYEQI LAENEKLAQLHDTNMELTDLKLQLEKATQRQERFADRSL<br/>EMEKRRERLERRISEMEEELKMLPDLKADNQRLLKDENGALIRVSKLSK</p> <p><b>Notes</b><br/>MYPT1 myosin phosphatase target subunit 1, a regulatory subunit of protein phosphatase 1. Also called the myosin-binding subunit of myosin phosphatase. Myosin phosphatase regulates the interaction of actin and myosin downstream of the guanosine triphosphatase Rho. Four splice-variant isoforms have been described. The binding of 14-3-3beta to MYPT1 diminished the direct binding between MYPT1 and myosin II, and 14-3-3beta overexpression abolished MYPT1 localization at stress fiber. Furthermore, 14-3-3beta inhibited MLCP holoenzyme activity via the interaction with MYPT1. # Epidermal growth factor (EGF) stimulation increased both Ser472 phosphorylation and the binding of MYPT1-14-3-3. Rho-kinase inhibitor inhibited the EGF-induced Ser472 phosphorylation and the binding of MYPT1-14-3-3.</p> <p><b>References to 14-3-3 binding to PPP1R12A</b><br/>Koga Y, Ikebe M. A novel regulatory mechanism of myosin light chain phosphorylation via binding of 14-3-3 to myosin phosphatase. <i>Mol Biol Cell.</i> 2008 Mar;19(3):1062-71.</p>                                                                                                                                                                                                                                                                                                                                                                                                                                                                                                                                                                                                                                                                                                                                                                                                                                                                                                                                                                                                                                                                                                                                                                                                                                                                                                                                                                                                                                                                                                                                                                                                                                                                                                                                                                                                                                                                                                                                                                                                                                                                                                                                                                                                            |  |
| <p><b>Human PRKCE</b> (PKCE) Protein kinase C epsilon (Swissprot = Q02156)</p> <p>1 M VVFNGLLKI KICEAVSLKP TAWSLRHAVG PRPQTFLLDP YIALNVDDSR IGQTATKQKT<br/>61 N SPAWHDEFV TDVCNGR KIE LAVFHDAPIG YDDFVANCTI QFEELLQNGS RHFEDWIDLE<br/>121 P EGRVYVID LSGSSGEAPK DNEERVFRER MRPRKRQGA V RRRVHQVNGH KFMATYLRQP<br/>181 TYCSHCRDFI WGVIGKQGYQ CQVCTCVVHK RCHELIITKC AGLKKQETPD QVGSQRFVSN<br/>241 MPHKFGIHNY KVPTFCDCG SLLWGLLRQG LQCKVCKMNV HRCETNVAP NCGVDARGIA<br/>301 KVLADLGVTP DKITNSGQRR KKLIA GAESP QPASGSSPSE EDRSKSAPTS PCDQEI KELE<br/>361 NNIRKALSFD NRGEHRAAS SPDGQLMSPG ENGEVRQQA KRLGLDEFNF IKVLGKGSFG<br/>421 KVMLAELKKG DEVYAVKVLK KDVLQDDVD DCTMTEKRIL ALARKHPYLT QLYCCFQTKD<br/>481 RLFVMEYVNV GGDLMFQIQR SRKFDEPRSR FYAAEVTSAL MFLHQHGVIY RDLKLDNILL<br/>541 DAEGHCKLAD FGMCKEGILN GVTTFCTCGT PDYIAP EILQ ELEYGPSVDW WALGVLMYEM<br/>601 MAGQPFPEAD NEDDLFESIL HDDVLYPVWL SKEAVSILKA FMTKNPHKRL GCVASQNGED<br/>661 AIKQHPFFKE IDWVLEQKK IKPPFKPRIK TKRDVNNFDQ DFTREEPVLT LVDEAIVKQI<br/>721 NQEEFKGFSY FGEDLMP</p> <p>&gt;gi 400135 sp Q02156.1 KPE_HUMAN RecName: Full=Protein kinase C epsilon<br/>type; AltName: Full=nPKC-epsilon<br/>MVVFNGLLKI KICEAVSLKPTAWSLRHAVGPRPQTFLLDPYIALNVDDSRIGQTATKQKTNSPAWHDEFV<br/>TDVCNGRKIE LAVFHDAPIGYDDFVANCTIQFEELLQNGSRHFEDWIDLEPEGRVYVIDLSGSSGEAPK<br/>DNEERVFRERMRPRKRQGA VRRRVHQVNGHKFMATYLRQPTYCSHCRDFIWGVIGKQGYQCQVCTCVVHK<br/>RCHELIITKCAVGLKQETPDQVGSQRFVSNMPHKFGIHNYKVPTFCDCGSLWGLLRQGLQCKVCKMNV<br/>HRCETNVAPNCGVDARGIAKVLADLGVTPDKITNSGQRRKKLIA GAESPQPASGSSPSEEDRSKSAPTS<br/>PCDQEI KELENNIRKALSFDNRGEHRAASSPDGQLMSPGENGEVRQQA KRLGLDEFNF IKVLGKGSFG<br/>KVMLAELKKGDEVYAVKVLK KDVLQDDVDCTMTEKRILALARKHPYLTQLYCCFQTKDR LFFVMEYVNV<br/>GGDLMFQIQRSRKFDEPRSRFYAAEVTSALMFLHQHGVIYRDLKLDNILLDAEGHCKLADFGMCKEGILN<br/>GVTTFCTCGTPDYIAP EILQ ELEYGPSVDWWALGVLMYEMMAGQPFPEADNEDDLFESILHDDVLYPVWL<br/>SKEAVSILKAFMTKNPHKRLGCVASQNGEDA IKQHPFFKE IDWVLEQKKIKPPFKPRIKTKRDVNNFDQ<br/>DFTREEPVLT LVDEAIVKQINQEEFKGFSYFGEDLMP</p> <p><b>Notes</b><br/>Phosphoserines 346(RSK(pS346)AP) and 368 (RKAL(pS)FD) interacting with 14-3-3. These sites are unique for PKCepsilon and are conserved through evolution. The actions of p38 and glycogen synthase kinase-3beta (GSK3beta) produce a mode 1 motif at residues 343–348 (RSKpSAP) of PKCalt epsilon and autophosphorylation produces a divergent mode 2 motif at residues 364–370 (RKALpSFD) lacking proline at +2 and an aromatic residue at the -2 position (Durgan et al, 2008; Saurin et al, 2008; Fig 1A). The 14-3-3 interaction mediated by these motifs is crucial for the exit from cytokinesis, as shown by PKCalt epsilon mutants S346A/S368A or R343A, which prevent the ability of PKCalt epsilon to recover cytokinesis defects after PKCalt epsilon knockout or knockdown (Saurin et al 2008).</p> <p><b>References to 14-3-3 binding to PKCepsilon</b><br/>Saurin AT, Durgan J, Cameron AJ, Faisal A, Marber MS, Parker PJ. The regulated assembly of a PKCepsilon complex controls the completion of cytokinesis. <i>Nat Cell Biol.</i> 2008 Aug;10(8):891-901.<br/>Durgan J, Cameron AJ, Saurin AT, Hanrahan S, Totty N, Messing RO, Parker PJ. The identification and characterization of novel PKCepsilon phosphorylation sites provide evidence for functional cross-talk within the PKC superfamily. <i>Biochem J.</i> 2008 Apr 15;411(2):319-31.<br/>Diouf B, Collazos A, Labesse G, Macari F, Choquet A, Clair P, Gauthier-Rouvière C, Guérineau NC, Jay P, Hollande F, Joubert D. A 20-Amino Acid Module of Protein Kinase C {epsilon} Involved in Translocation and Selective Targeting at Cell-Cell Contacts. <i>J Biol Chem.</i> 2009 Jul 10;284(28):18808-15.<br/>Kostecky B, Saurin AT, Purkiss A, Parker PJ, McDonald NQ. Recognition of an intra-chain tandem 14-3-3 binding site within PKCepsilon. <i>EMBO Rep.</i> 2009 Aug 7. [Epub ahead of print]</p> |  |
| <p><b>Human PRLR</b> prolactin receptor 1 (PrlR) (Swissprot = P16471)</p> <p>1 M KENVASATV FTLLFLNLC LLNGQLPPGK PEIFKCRSPN KETFTCWWRP GTDGGGLPTNY<br/>61 SLTYHREGET LMHECPDYIT GGPNSCHFGK QYTSMWRTYI MMVNATNQMGS SFSDELIVD<br/>121 VTYIVQPDPP LELAVEVKQP EDRKPYLWIK WSPPTLIDLK TGWFTLLYEI RLKPEKAAEW<br/>181 EIHFAQQTE FKILSLHPGQ KYLVQVRCKP DHGYWSAWSP ATFIQIPSDF TMNDTTVWIS<br/>241 VAVLSAVICL IIVWAVALKG YSMVTCIFPP VPGPKIKGFD AHLLEKGSKE ELLSALGCQD<br/>301 FPPTS DYEDL LVEYLEVDDS EDQHLMSVHS KEHPSQGMKP TYLDPD TDSG RGSCDSPSL<br/>361 SEKCEEPQAN PSTFYDPEVI EKPENPETH TWDPQCISME GKIPYFHAGG SKCSWPLPQ<br/>421 PSQHNFRSSY HNITDVCELA VGPAGAPATL LNEAGKDALK SSQTIKSREE GKATQQREVE</p>                                                                                                                                                                                                                                                                                                                                                                                                                                                                                                                                                                                                                                                                                                                                                                                                                                                                                                                                                                                                                                                                                                                                                                                                                                                                                                                                                                                                                                                                                                                                                                                                                                                                                                                                                                                                                                                                                                                                                                                                                                                                                                                                                                                                                                                                                                                                                                                                                                                                                                                                                                                                                                                                                                                                                                                                                                                                                                                                                                                                                                                                                                                                                                                                              |  |

|                                                                                                                                                                                                                                                                                                                                                                                                                                                                                                                                                                                                                                                                                                                                                                                                                                                                                                                                                                                                                                                                                                                                                                                                                                                                                                                                                                                                                                                                                                                                                                                                                                                                                                                                                                                                                                                                                                                                                                                                                                                                                                                                                                                                                                                                                                                                                                                                                                                                                                                                                                                                                                                                                                                                                                                                                                                                                                                                                                                                                                                                                                                                                                                                                                                                                                                                                                                                                                                                                                                                                                                                                                                                                                  |  |
|--------------------------------------------------------------------------------------------------------------------------------------------------------------------------------------------------------------------------------------------------------------------------------------------------------------------------------------------------------------------------------------------------------------------------------------------------------------------------------------------------------------------------------------------------------------------------------------------------------------------------------------------------------------------------------------------------------------------------------------------------------------------------------------------------------------------------------------------------------------------------------------------------------------------------------------------------------------------------------------------------------------------------------------------------------------------------------------------------------------------------------------------------------------------------------------------------------------------------------------------------------------------------------------------------------------------------------------------------------------------------------------------------------------------------------------------------------------------------------------------------------------------------------------------------------------------------------------------------------------------------------------------------------------------------------------------------------------------------------------------------------------------------------------------------------------------------------------------------------------------------------------------------------------------------------------------------------------------------------------------------------------------------------------------------------------------------------------------------------------------------------------------------------------------------------------------------------------------------------------------------------------------------------------------------------------------------------------------------------------------------------------------------------------------------------------------------------------------------------------------------------------------------------------------------------------------------------------------------------------------------------------------------------------------------------------------------------------------------------------------------------------------------------------------------------------------------------------------------------------------------------------------------------------------------------------------------------------------------------------------------------------------------------------------------------------------------------------------------------------------------------------------------------------------------------------------------------------------------------------------------------------------------------------------------------------------------------------------------------------------------------------------------------------------------------------------------------------------------------------------------------------------------------------------------------------------------------------------------------------------------------------------------------------------------------------------------|--|
| <p>481 SFHSETDQDT PWLLPQEKTP FGSAKPLDYV EIHKVNKDGA LSLLPKQREN SGKPKKPGTP<br/> 541 ENNKEYAKVS GVMDDNLLVL VPDPAKNAVA CFEESEAKEAP PSLEQNQAEK ALANFTATSS<br/> 601 KCRLQLGGLD YLDPACFTHS FH</p> <p>&gt;gi 130321 sp P16471.1 PRLR_HUMAN RecName: Full=Prolactin receptor;<br/> Short=PRL-R; Flags: Precursor</p> <p>MKENVASATVFTLLFLNLTCLLNGQLPPGKPEIFKCRSPNKETFTCWWRPGTDGGLPTNYSLTYHREGET<br/> LMHECPDYITGGPNSCHFGKQYTSMWRTYIMVNATNQMGSSFSDELYVDVYIVQDPPLELAVEVKQP<br/> EDRKPYLWIKWSPPTLIDLKTGWFTLLYEIRLKEKAAEWEIHFAGQQTEFKILSLHPGQKYLQVVRCKP<br/> DHGYWSAWSPATFIQIPSDFTMNDTTVWISVAVLSAVICLIIVVAVALKGYSMVTCIFPPVPGPKIKGFD<br/> AHLLEKKGSEELLSALGCQDFPPTSDYEDLLVEYLEVDDSEDQHLMSVHSKEHPSQGMKPTYLDPDTDSG<br/> RGSDCSPSSLSEKCEEPQANPSTFYDPEVIEKPEPETHTWDPQCISMEGKIPIYFHAGGSKCSTWPLPQ<br/> PSQHNPRSSYHNITDVCELAVGPAGAPATLLNEAGKDALKSSQTIKSREEGKATQOREVESFHSETDQDT<br/> PWLLPQEKTPFGSAKPLDYVEIHKVNKDGA LSLLPKQRENSGKPKKPGTPENNKEYAKVSGVMDDNLLVL<br/> VPDPAKNAVACFEESEAKEAPP SLEQNQAEKALANFTATSSKRLQLGGLDYLDPACFTHS FH</p> <p><b>Notes</b><br/> Motif (KCSpT<sup>391</sup>WP) in the long form of the human PrLR is conserved among a wide variety of species.</p> <p><b>References to 14-3-3 binding to prolactin receptor</b><br/> Olayioye MA, Guthridge MA, Stomski FC, Lopez AF, Visvader JE, Lindeman GJ. Threonine 391 phosphorylation of the human prolactin receptor mediates a novel interaction with 14-3-3 proteins. <i>J Biol Chem.</i> 2003 Aug 29;278(35):32929-35.<br/> Fiol DF, Sanmarti E, Sacchi R, Kültz D. A novel tilapia prolactin receptor is functionally distinct from its paralogue. <i>J Exp Biol.</i> 2009 Jul;212(Pt 13):2007-15. (two fish prolactin receptors of which only isoform 1 contains the 14-3-3-binding site)</p>                                                                                                                                                                                                                                                                                                                                                                                                                                                                                                                                                                                                                                                                                                                                                                                                                                                                                                                                                                                                                                                                                                                                                                                                                                                                                                                                                                                                                                                                                                                                                                                                                                                                                                                                                                                                                                                                                                                                                 |  |
| <p><b>Human PTPN3</b> Tyrosine-protein phosphatase non-receptor type 3 (aka Protein-tyrosine phosphatase H1 (PTPH1))<br/> (Swissprot = P26045)</p> <p>1 MTSRLRALGG RINNIRTSEL PKEKTRSEVI CSIHFLDGVV QTFKVTQKQDT GQVLLDMVHN<br/> 61 HLGVTEKEYF GLQHDDSDVD SPRWLEASKA IRKQLKGGFP CTLHFRVRF IPDPNTLQOE<br/> 121 QTRHLYFLQL KMDICEGRLT CPLNSAVVLA SYAVQSHFGD YNSSIHHPGY LSDSHFIPDQ<br/> 181 NEDFLTKVES LHEQHSGLKQ SEAESCYNINI ARTLDFYGV LHSGRDLHNL DLMIGIASAG<br/> 241 VAVYRKYICT SFYPWVNLK ISFKRKKFFI HQRQKQAESR EHIVAFNMLN YRSCKNLWKS<br/> 301 CVEHHTFFQA KLLLPQEKNV LSQYWTMGSR NTKKSVNNQY CKKVIIGMVW NPAMRRSLSV<br/> 361 EHLETKSLPS RSPPTPNWR SPRLRHEIRK PRHSSADNLA NEMTYITETE DVFYTYKGS<br/> 421 APQSDSEVS QNRSPHQESL SENNPAQSYL TQKSSSSVSP SSNAPGSCSP DGVDQQLLDD<br/> 481 FHRVTKGGST EDASQYCYDK NDNGDSYLVL IRITPDEDGK FGFNLKGGVD QKMPLVVSRI<br/> 541 NPESPADTCI PKLNEGDQIV LINGRDISEH THDQVVMFIK ASRESHSREL ALVIRRAVR<br/> 601 SFADFSEDE LNQLFPEAIF PMPCEGGDTL EGSMAQLKKG LESGTVLIQF EQLYRKKPGL<br/> 661 AITFAKLPQN LDKNRYKDVLPYDTTRVLLQ GNEDYINASY VNMEIPAANL VNKYIATQGP<br/> 721 LPHTCAQFWQ VVWDQKLSLI VMLTTLTERG RTKCHQYWPD PPDVMNHGGF HIQCQSEEDCT<br/> 781 IAYVSREMLV TNTQTGEEHT VTHLQYVAWP DHGVPDDSSD FLEFVNYVRS LRVDSEPVLV<br/> 841 HCSAGIGRTG VLVMTETAMC LTERNLPIYP LDIVRKMMDQ RAMMVQTSSQ YKFVCEAILR<br/> 901 VYEEGLVQML DPS</p> <p>&gt;gi 229462761 sp P26045.2 PTN3_HUMAN RecName: Full=Tyrosine-protein phosphatase non-receptor type 3; AltName: Full=Protein-tyrosine phosphatase H1; Short=PTP-H1</p> <p>MTSRLRALGG RINNIRTSEL PKEKTRSEVICSIHFLDGVVQTFKVTQKQDTGQVLLDMVHNHLGVTEKEYF<br/> GLQHDDSDVDSRWRLEASKAIRKQLKGGFPCTLHFRVRFIPDPNTLQOEQTRHLYFLQLKMDICEGRLT<br/> CPLNSAVVLA SYAVQSHFGDYNSSIHHPGYLSDSHFIPDQNEEDFLTKVESLHEQHSGLKQSEAESCYNINI<br/> ARTLDFYGV LHSGRDLHNL DLMIGIASAGVAVYRKYICTSFYPWVNLKISFKRKKFFIHQRQKQAESR<br/> EHIVAFNMLN YRSCKNLWKSVEHHTFFQA KLLLPQEKNVLSQYWTMGSRNTKKSNNQYCKKVIIGMVW<br/> NPAMRRSLSVEHLETKSLPSRSPPTPNWRSPRLRHEIRKPRHSSADNLANEMTYITETEDVFYTYKGS<br/> APQSDSEVSQNRSPHQESLSENNPAQSYLTQKSSSSVSPSSNAPGSCSPDGVDQQLLDDFHRVTKGGST<br/> EDASQYCYDKNDNGDSYLVLIRITPDEDGKFGFNLKGGVDQKMPLVVSRIINPESPADTCIPKLNEGDQIV<br/> LINGRDISEHTNDQVVMFIKASRESHSRELAIVIRRAVRSFADFSEDELNQLFPEAIFPMPCEGGDTL<br/> EGSMAQLKKGLESSTVLIQFQELYRKKPGLAITFAKLPQNLDKNRYKDVLPYDTTRVLLQGNEDYINASY<br/> VNMEIPAANLVNKYIATQGPLPHTCAQFWQVVWDQKLSLIVMLTTLTERGRTKCHQYWPDPDVMNHGGF<br/> HIQCQSEEDCTIAYVSREMLVTNTQTGEEHTVTHLQYVAWPDHGVDPDDSSDFLEFVNYVRS LRVDSEPVLV<br/> HCSAGIGRTGVLVMTETAMCLTERNLPIYPLDIVRKMMDQRAMMVQTSSQYKFVCEAILRVYEEGLVQML<br/> DPS</p> <p><b>Notes</b><br/> “Protein tyrosine phosphatase) non-receptor type 3; protein-tyrosine phosphatase H1 (PTPH1) that may act at junctions between the membrane and the cytoskeleton. Two novel motifs RSLs359VE and RVDS853EP in PTPH1 were identified as major 14-3-3beta-binding sites, both of which are distinct from the consensus binding motif RSXSXP recently found in Raf-1. Mutation of Ser359 and Ser853 to alanine significantly reduced the association between 14-3-3beta and PTPH1. Furthermore, association of PTPH1 and 14-3-3beta was detected in several cell lines and was regulated in response to extracellular signals. (Zhang et al 1997)”<br/> Two 14-3-3 binding phosphorylated sites are RSLpS<sup>359</sup>VE and RVDpS<sup>853</sup>EP (=Ser853 in Swissprot = P26045)</p> <p><b>References to 14-3-3 binding to PTPN3 (PTPH1)</b><br/> S. H. Zhang, R. Kobayashi, P. R. Graves, H. Piwnicka-Worms, and N. K. Tonks, Serine phosphorylation-dependent association of the band 4.1-related protein-tyrosine phosphatase PTPH1 with 14-3-3beta protein, <i>J Biol Chem</i> 272 (1997) 27281-27287.</p> |  |
| <p><b>Human Raf1 (CRAF)</b> (Swissprot = P04049)</p> <p>1 MEHIQGAWKT ISNGFGFKDA VFDGSSCISP TIVQQFGYQR RASDDGKLT D PSKTSNTIRV<br/> 61 FLPNKQRTVV NVRNGMSLHD CLMKALKVRG LQPECCAVFR LLHEHKGKKA RLDWNTDAAS<br/> 121 LIGEELOVDF LDHVPLTTHN FARKTFLKLA FCDICQKFL NGFRQCQTCGY KFHEHCSTKV<br/> 181 PTMCDWDSNI RQLLLFPNST IGDGVPALP SLTMRRMRES VSRMPVSSQH RYSTPHAFTF<br/> 241 NTSSPSSEGS lsqrqrstst PNVHMVSTTL PVDSRMIEDA IRSHSESASP SALSSSPNNL</p>                                                                                                                                                                                                                                                                                                                                                                                                                                                                                                                                                                                                                                                                                                                                                                                                                                                                                                                                                                                                                                                                                                                                                                                                                                                                                                                                                                                                                                                                                                                                                                                                                                                                                                                                                                                                                                                                                                                                                                                                                                                                                                                                                                                                                                                                                                                                                                                                                                                                                                                                                                                                                                                                                                                                                                                                                                                                                                                                                                                                                                                                                                                                                                                                                                                       |  |

|                                                                                                                                                                                                                                                                                                                                                                                                                                                                                                                                                                                                                                                                                                                                                                                                                                                                                                                                                                                                                                                                                                                                                                                                                                                                                                                                                                                                                                                                                                                                                                                                                                                                                                                                                                                                                                                                                                                                                                                                                                                                                                                                                                                                                                                                                                                                                                                                                                                                                                                                                                                                                                                                                                                                                                                                                                                                                                                                                                                                                                                                                                                                                                                                                                                                                                                                                                                                                                                                                                                                                                                                                                                                                                                                                                                                                                                                                                    |  |
|----------------------------------------------------------------------------------------------------------------------------------------------------------------------------------------------------------------------------------------------------------------------------------------------------------------------------------------------------------------------------------------------------------------------------------------------------------------------------------------------------------------------------------------------------------------------------------------------------------------------------------------------------------------------------------------------------------------------------------------------------------------------------------------------------------------------------------------------------------------------------------------------------------------------------------------------------------------------------------------------------------------------------------------------------------------------------------------------------------------------------------------------------------------------------------------------------------------------------------------------------------------------------------------------------------------------------------------------------------------------------------------------------------------------------------------------------------------------------------------------------------------------------------------------------------------------------------------------------------------------------------------------------------------------------------------------------------------------------------------------------------------------------------------------------------------------------------------------------------------------------------------------------------------------------------------------------------------------------------------------------------------------------------------------------------------------------------------------------------------------------------------------------------------------------------------------------------------------------------------------------------------------------------------------------------------------------------------------------------------------------------------------------------------------------------------------------------------------------------------------------------------------------------------------------------------------------------------------------------------------------------------------------------------------------------------------------------------------------------------------------------------------------------------------------------------------------------------------------------------------------------------------------------------------------------------------------------------------------------------------------------------------------------------------------------------------------------------------------------------------------------------------------------------------------------------------------------------------------------------------------------------------------------------------------------------------------------------------------------------------------------------------------------------------------------------------------------------------------------------------------------------------------------------------------------------------------------------------------------------------------------------------------------------------------------------------------------------------------------------------------------------------------------------------------------------------------------------------------------------------------------------------------|--|
| <pre> 301 SPTGWSQPKT PVPAQRERAP VSGTQEKNKI RPRGQRDSSY YWEIEASEVM LSTRIGSGSF 361 TVVYKQKWHG DVAVKILKVV DPTPEQFQAF RNEVAVLRKT RHNVILLFVG YMTKDNLAIV 421 GTWYCEGSSLY KHLHVQETKF QMFQLIDIAR QTAQGM DYLH AKNI IHRDMK SNNIFLHEGL 481 TVKIGDFGLA TVKSRWSSGQ QVEQPTGSVL WMAPEVIRMQ DNNPFSFQSD VYSYGVLYE 541 LMTGELPYSH INNDRQIIFM VGRGYASPD L SKLYKNC PKA MKRLVADCVK KVKEERPLPF 601 QILSSIELLQ HSLPKINRSA SEPSLHRAAH TEDINACTLT TSPRLPVF &gt;gi 125651 sp P04049.1 RAF1_HUMAN RecName: Full=RAF proto-oncogene serine/threonine-protein kinase; AltName: Full=C-RAF; Short=cRaf; AltName: Full=Raf-1 MEHIQGAWKTI SNGFGFKDAVFDGSSCISPTIVQQFGYQRRASDDGKLTDPKSTNTIRVFLPNKQRTVV NVRNGMSLDCLMKALKVRLQPECCAVFRLLEHKGKARLDWNTDAASLIGEEQLQVDFLDHVP LTHN FARKTFLKLAFCDIQKFLNNGFRQTCGYKFHEHCSTKVP TMCVDWSNIRQLLFPNSTIGDSGVPALP SLTMRRESVSRMPVSSQHRYSTP HAFNTSSPSSSEGLSQRQRSTSTPNVHMVSTTLPVDSRMIEDA IRSHSESASPSALSSPNNSPTGWSQPKTPVPAQRERAPVSGTQEKNKI RPRGQRDSSY YWEIEASEVM LSTRIGSGSFGTVYKQKWHGDVAVKILKVV DPTPEQFQAFRNEVAVLRKTRHVNILLFMGYMTKDNLAIV TQWCEGSSLYKHLHVQETKFQMFQLIDIARQTAQGM DYLHAKNI IHRDMKSNNI FLHEGLTVKIGDFGLA TVKSRWSSGQVEQPTGSVLWMAPEVIRMQDNNPFSFQSDVYSYGVLYELMTGELPYSHINNDRQIIFM VGRGYASPDLSKLYKNC PKAMKRLVADCVKVKKEERPLFPQILSSIELLQHSLPKINRSASEPSLHRAAH TEDINACTLT TSPRLPVF </pre> <p><b>Notes</b></p> <p><b>References to 14-3-3 binding to Raf</b></p> <p>Freed E, Symons M, Macdonald SG, McCormick F, Ruggieri R. Binding of 14-3-3 proteins to the protein kinase Raf and effects on its activation. <i>Science</i>. 1994 Sep 16;265(5179):1713-6.</p> <p>Irie K, Gotoh Y, Yashar BM, Errede B, Nishida E, Matsumoto K. Stimulatory effects of yeast and mammalian 14-3-3 proteins on the Raf protein kinase. <i>Science</i>. 1994 Sep 16;265(5179):1716-9.</p> <p>Fu H, Xia K, Pallas DC, Cui C, Conroy K, Narsimhan RP, Mamon H, Collier RJ, Roberts TM. Interaction of the protein kinase Raf-1 with 14-3-3 proteins. <i>Science</i>. 1994 Oct 7;266(5182):126-9.</p> <p>Fantl WJ, Muslin AJ, Kikuchi A, Martin JA, MacNicol AM, Gross RW, Williams LT. Activation of Raf-1 by 14-3-3 proteins. <i>Nature</i>. 1994 Oct 13;371(6498):612-4.</p> <p>Li S, Janosch P, Tanji M, Rosenfeld GC, Waymire JC, Mischak H, Kolch W, Sedivy JM. Regulation of Raf-1 kinase activity by the 14-3-3 family of proteins. <i>EMBO J</i>. 1995 Feb 15;14(4):685-96.</p> <p>Michaud NR, Fabian JR, Mathes KD, Morrison DK. 14-3-3 is not essential for Raf-1 function: identification of Raf-1 proteins that are biologically activated in a 14-3-3- and Ras-independent manner. <i>Mol Cell Biol</i>. 1995 Jun;15(6):3390-7.</p> <p>Muslin AJ, Tanner JW, Allen PM, Shaw AS. Interaction of 14-3-3 with signaling proteins is mediated by the recognition of phosphoserine. <i>Cell</i>. 1996 Mar 22;84(6):889-97.</p> <p>Dhillon AS, Yip YY, Grindlay GJ, Pakay JL, Dangers M, Hillmann M, Clark W, Pitt A, Mischak H, Kolch W. The C-terminus of Raf-1 acts as a 14-3-3-dependent activation switch. <i>Cell Signal</i>. 2009 Jul 10. [Epub ahead of print]</p> <p>Fischer A, Baljuls A, Reinders J, Nekhoroshkova E, Sibiiski C, Metz R, Albert S, Rajalingam K, Hekman M, Rapp UR. Regulation of RAF activity by 14-3-3 proteins: RAF kinases associate functionally with both homo- and heterodimeric forms of 14-3-3 proteins. <i>J Biol Chem</i>. 2009 Jan 30;284(5):3183-94.</p> <p>Baljuls A, Schmitz W, Mueller T, Zahedi RP, Sickmann A, Hekman M, Rapp UR. Positive regulation of A-RAF by phosphorylation of isoform-specific hinge segment and identification of novel phosphorylation sites. <i>J Biol Chem</i>. 2008 Oct 3;283(40):27239-54.</p> <p>Ory S, Zhou M, Conrads TP, Veenstra TD, Morrison DK. Protein phosphatase 2A positively regulates Ras signaling by dephosphorylating KSR1 and Raf-1 on critical 14-3-3 binding sites. <i>Curr Biol</i>. 2003 Aug 19;13(16):1356-64.</p> |  |
| <p><b>Human Raptor</b> Regulatory-associated protein of mTOR (Swissprot = Q8N122)</p> <pre> 1 MESEMLQSP L LGLGEEDEAD LTDWNLP LAF MKKRHCEKIE GSKSLAQSWR MKDRMKT VSV 61 ALVLC LNVG V DPPDVVKTTP CARLECWIDP LSMGPQKALE TIGANLQKQY ENWQPRARYK 121 QSLDPTVDEV KKLCTSLRRN AKEERVLFHY NGHGVPRPTV NGEVWVFNKN YTYIPLSIY 181 DLQ TWMGSPS IFVYDCSNAG LIVKSFQFQA LQREQELEVA AINPNHPLAQ MPLPPSMKNC 241 IQLAACEATE LLPMPDLPA DLFTSCLTTP IKIALRWFCM QRCVSLVPGV TLDLIEKIPG 301 RLNDRRTPGL ELNWI FTAIT DTIAWNVLPR DLFQKLFROD LLVASLFRNF LLAERIMRSY 361 NCTPVSSPRL PPTYMHAMWQ AWDLAVDIDL SQLPTIIEEG TAFRHSPPFA EQLTAFQVWL 421 TMGVENRNPP EQLPIVLQVL LSQVHRLRAL DLLGRFLDLG PWA VSLALS GIPFYVLKLL 481 QSSARELRPL LVFIWAKILA VDSSCADLV KDNHGKYFLS VLADPYMPAE HRTMTAFILA 541 VIVNSYHTGQ EACLQGNLIA ICLEQLNDPH PLLRQWVAIC LGRIWQNFDS ARWCGVRDSA 601 HEKLYSLSD PIPEVRC AAV FALGTFVGN S AERTDHSTTI DHNVAMMLAQ LVSDGSPMVR 661 KELVALSHL VVQYBSNFT VALQFIEEEK NYALPSPATT EGGSLTPVRD SPTPRLRSV 721 S SYGNIRAVA TARSLNKS LQ NLSLTEESGG AVAFSPGNLS TSSSASSTLG SPENEHILS 781 FETIDKMRR A S SYSSLNSLI GVSFN SVYTQ IWRVLLHLAA DPYEVSDVA MKVLNSIAYK 841 ATVNARPQRV LDTSSSLTQSA PASPTNKG V IHQAGGSPPA SSTSSSSLTN DVAKQPVS RD 901 LPSGRPFTTG PAGAQTYPHS HQFPRTRKMF DKGPEQTADD ADDAAGHKS F ISATVQTGFC 961 DWSARYFAQP VMKIP E EHL ESQIRKEREW RFLRNSRVRR QAQQVIQKGI TRLDQDIFLN 1021 RNP GVP SVVK FHPFTPCIAV ADKDSICFWD WEKGEKLDYF HNGNPRYTRV TAMEYLNQD 1081 CSLLLTATDD GAIRVWKNFA DLEKNPEMVT AWQGLSDMLP TTRGAGMVVD WEQETGLLMS 1141 S GDVRI VRIW DTDREMKVQD IPTGADSCVT SLSCDSHRS L IVAGLGDGSI RVD RRMALS 1201 ECRVM TYREH TAWVVKASLQ KRPDGHIVSV SVNGDVRI FD PRMPESV NVL QIVKGLTALD 1261 IHPQADLIAC GSVNQFTAIY NSSGELINNI KYDGFMGQR VGAI SCLAFH PHWPHLAVGS 1321 NDYIISVYSV EKRVR &gt;gi 46577501 sp Q8N122.1 RPTOR_HUMAN RecName: Full=Regulatory-associated protein of mTOR; Short=Raptor; AltName: Full=P150 target of rapamycin (TOR)- scaffold protein MESEMLQSP L LGLGEEDEAD LTDWNLP LAFMKKRHCEKIEGSKSLAQSWR MKDRMKT VSV ALVLC LNVG </pre>                                                                                                                                                                                                                                                                                                                                                                                                                                                                                                                                                                                                                                                                                                                                                                                                                                                                                                                                                                                                                                                                                                                                                                                                                                                                                                                                                                                                                                                                                                                                                                                                                                                                                                                                                                                                                                                                                             |  |

|                                                                                                                                                                                                                                                                                                                                                                                                                                                                                                                                                                                                                                                                                                                                                                                                                                                                                                                                                                                                                                                                                                                                                                                                                                                                                                                                                                                                                                                                                                                                                                                                                                                                                                                                                                                                                                                                                                                                                                                                                                                                                                                                                                                                                                                                                                                                                                                                                                                                                                                                                                                                                                                                                                                                                                                                                                                                                                                                                                                                                                                                                                                                                                                                                                                                                                                                                                                                                                        |  |
|----------------------------------------------------------------------------------------------------------------------------------------------------------------------------------------------------------------------------------------------------------------------------------------------------------------------------------------------------------------------------------------------------------------------------------------------------------------------------------------------------------------------------------------------------------------------------------------------------------------------------------------------------------------------------------------------------------------------------------------------------------------------------------------------------------------------------------------------------------------------------------------------------------------------------------------------------------------------------------------------------------------------------------------------------------------------------------------------------------------------------------------------------------------------------------------------------------------------------------------------------------------------------------------------------------------------------------------------------------------------------------------------------------------------------------------------------------------------------------------------------------------------------------------------------------------------------------------------------------------------------------------------------------------------------------------------------------------------------------------------------------------------------------------------------------------------------------------------------------------------------------------------------------------------------------------------------------------------------------------------------------------------------------------------------------------------------------------------------------------------------------------------------------------------------------------------------------------------------------------------------------------------------------------------------------------------------------------------------------------------------------------------------------------------------------------------------------------------------------------------------------------------------------------------------------------------------------------------------------------------------------------------------------------------------------------------------------------------------------------------------------------------------------------------------------------------------------------------------------------------------------------------------------------------------------------------------------------------------------------------------------------------------------------------------------------------------------------------------------------------------------------------------------------------------------------------------------------------------------------------------------------------------------------------------------------------------------------------------------------------------------------------------------------------------------------|--|
| <p>DPPDVVKTTPCARLECWIDPLSMGPKQALETIGANLQKQYENWQPRARYKQSLDPTVDEVKKLCSTLRRN<br/> AKEERVLFHYNGHGVPRPTVNGEVVWFNKNYTYIPLSIYDLQTMGMSPSIFVYDCSNAGLIVKSFQKFA<br/> LQREQELEVAAINPNHPLAQMLPLPSPMKNCIQLAACAEATELLPMIPDLPADLFTSCLTTPKIALRWFCM<br/> QKCVSLVPGVTLDLIEKIPGRLNDRRTPLGELNWIFTAITDTIAWNVLPRLDFQKLFQDRLLVASLFRNF<br/> LLAERIMRSYNTCPVSSPRLPPTYMHAMWQAWDLAVDICTLQSLPTIEEGTAFRHSFFFAEQLTAFQVWL<br/> TMGVENRNPEQLPVLVQLVLLSQVHRLRALDGLGRFLDLGPWAVSLALSVDGIFPYYVLLKLLQSSARELRPL<br/> LVFIWAKILAVDSSQADLVKDNHGKHYFLSVLADPYMPAEHRTMTAFILAVIVNSYHTGQEAQLQGNLIA<br/> ICLEQLNDPPLLRQWVAICLGRWQNFDSARWCVGRDSEHEKLYSLLSDPIPEVRCAAVFAVFGTAVGNS<br/> AERTDHSTTIDHNVAMMLAQVSDGSPMVRKELVVALSHLVVQYENFCTVALQFIEEEKNYALPSPATT<br/> EGGSLTPVRDSPCTPRLRSVSSYGNIRAVATARSLNKSLQNLSTLSESGGAVAFSPGNLSTSSSSASTLG<br/> SPENEHILSFETIDKMRASSYSSLSNLIGVSNVSYTQIWRVLLHLAADPYPEVSDVAMKVLNSIAYK<br/> ATVNARPQRVLDTSSLTQSAFASPTNKGVHIHQAGGSPASSTSSSLTNDVAKQPVSRDLPSGRPGTTG<br/> PAGAQTTPHSHQFPRTKMFQKGPQATDADDAAGHKSFI SATVQTGFCDWSARYFAQPVMKIPEEHDL<br/> ESQIRKEREWRFRLNRSRVRQAQVVIQKGI TRLDQIFLNRNPGVPSVVKFHPFTPCIAVADKDSICFWD<br/> WEKGEKLDYFHNGNPRYTRVTAMEYLNQDCSLLLTATDDGAI R VWNKFADEKNEPMTAWQGLSDMLP<br/> TTRGAGMVVDWEQETGLLMSGSDVRI VRIWDTDREMKVQDIPTGADSCVTSLSCDSHRSLIVAGLDGDSI<br/> RVYDRMALSECRVMTYREHTAWVVKASLQKRPDGHIVSVVNGDVRI FDPMPESVNVLQIVKGLTALD<br/> IHPQADLIACGSVNQFTAIYNSSGELINNIKYDGFMGQRVGAISCLAFHHPHPLAVGNSNDYYISVYSV<br/> EKRRV</p> <p><b>Notes</b><br/> Raptor is a regulatory component of the TORC1 complex (with mTOR) by which cells coordinate the rate of cell growth and maintenance of cell size with different environmental conditions. AMPK directly phosphorylates the mTOR binding partner raptor on two well-conserved serine residues, and this phosphorylation induces 14-3-3 binding to raptor.</p> <p><b>References to 14-3-3 binding to Raptor</b><br/> Gwinn DM, Shackelford DB, Egan DF, Mihaylova MM, Mery A, Vasquez DS, Turk BE, Shaw RJ. AMPK phosphorylation of raptor mediates a metabolic checkpoint. <i>Mol Cell.</i> 2008 Apr 25;30(2):214-26.</p>                                                                                                                                                                                                                                                                                                                                                                                                                                                                                                                                                                                                                                                                                                                                                                                                                                                                                                                                                                                                                                                                                                                                                                                                                                                                                                                                                               |  |
| <p><b>Human Rem2</b> RAS (RAD and GEM)-like GTP binding 2 (Swissprot = Q8IYK8-1)</p> <p>1 MDTETTALCP SGRSRASPPG TPTPEADATL LKKSEKLLAE LDRSGLPSAP GAPRRRG SMP<br/> 61 VPKYKQLRRA QAVDELDPWP QASSSGSSDS LGSGEAAPAQ KDGIFKVMLV GESGVGKSTL<br/> 121 AGTFGGLQGD SAHEPENPED TYERRIMVDK EEVTLVVYDI WEQGDAGGWL RDHCLQTGDA<br/> 181 FLIVFSVTRD RSFSKVPETL LRLRAGRPHH DLPVILVGNK SDLARSREVS LEEGRHLAAGT<br/> 241 LSCKHETSAL ALHHTREL FEGAVRQIRLR RGRNHAGGQR PDPGSPGPA PPARRESLTK<br/> 301 KAKRFLANLV PRNAKFFKQR SRSCHDLSVL</p> <p>&gt;gi 51316478 sp Q8IYK8.1 REM2_HUMAN RecName: Full=GTP-binding protein REM 2;<br/> AltName: Full=Rad and Gem-like GTP-binding protein 2<br/> MDTETTALCP SGRSRASPPG TPTPEADATL LKKSEKLLAE LDRSGLPSAP GAPRRRG SMP VPKYKQLRRA<br/> QAVDELDPWP QASSSGSSDS LGSGEAAPAQ KDGIFKVMLV GESGVGKSTL AGTFGGLQGD SAHEPENPED<br/> TYERRIMVDK EEVTLVVYDI WEQGDAGGWL RDHCLQTGDA FLIVFSVTRD RSFSKVPETL LRLRAGRPHH<br/> DLPVILVGNKSDLARSREVS LEEGRHLAAGT LSCKHETSAL ALHHTREL FEGAVRQIRLR RGRNHAGGQR<br/> PDPGSPGPA PPARRESLTK KAKRFLANLV PRNAKFFKQR SRSCHDLSVL</p> <p><b>Notes</b><br/> Fig 1 in Béguin et al (2005) shows that the 14-3-3-binding sites are conserved in Rem2 and Gem, but that a truncated form of Rem2 studied by Finlin and Andres (1999) lacks the first 14-3-3 binding site. "Although kir/Gem, Rad and Rem bind 14-3-3 in a phosphorylation-dependent manner (Ward et al 2004; Finlin and Andres 1999), Rem2 has been reported not to associate with 14-3-3 (Finlin et al 2000). In the present study, we re-evaluate the functions of Rem2 and its interaction with 14-3-3 and CaM. We show that Rem2 does associate with 14-3-3 and CaM and induces changes in cell morphology (sites = RRGpS<sup>69</sup>M, QRSRpS<sup>34</sup>C). 14-3-3, in co-operation with CaM, also regulates the subcellular distribution of Rem2. Rem2 interacts with the b-subunits in a GTP-dependent fashion and thereby blocks cell-surface expression of VDCCs. Thus Rem2 shares many previously unrecognized similarities with the other members of the RGK family."</p> <p><b>References to 14-3-3 binding to Rem2</b><br/> Béguin P, Mahalakshmi RN, Nagashima K, Cher DH, Kuwamura N, Yamada Y, Seino Y, Hunziker W. Roles of 14-3-3 and calmodulin binding in subcellular localization and function of the small G-protein Rem2. <i>Biochem J.</i> 2005 Aug 15;390(Pt 1):67-75. Erratum in: <i>Biochem J.</i> 2005 Nov 1;391(Pt 3):712. (Rat Rem2 AF084464)<br/> Béguin P, Mahalakshmi RN, Nagashima K, Cher DH, Ikeda H, Yamada Y, Seino Y, Hunziker W. Nuclear sequestration of beta-subunits by Rad and Rem is controlled by 14-3-3 and calmodulin and reveals a novel mechanism for Ca<sup>2+</sup> channel regulation. <i>J Mol Biol.</i> 2006 Jan 6;355(1):34-46.<br/> Finlin BS, Andres DA. Phosphorylation-dependent association of the Ras-related GTP-binding protein Rem with 14-3-3 proteins. <i>Arch Biochem Biophys.</i> 1999 Aug 15;368(2):401-12.<br/> Finlin, B. S., Shao, H., Kadono-Okuda, K., Guo, N. and Andres, D. A. (2000) Rem2, a new member of the Rem/Rad/Gem/Kir family of Ras-related GTPases. <i>Biochem. J.</i> 347, 223–231<br/> Bierings R, Beato M, Edel MJ. An endothelial cell genetic screen identifies the GTPase Rem2 as a suppressor of p19ARF expression that promotes endothelial cell proliferation and angiogenesis. <i>J Biol Chem.</i> 2008 Feb 15;283(7):4408-16.</p> |  |
| <p><b>Human RGS3</b> Regulator of G-protein signaling 3 (Swissprot = P49796)</p> <p>1 MPVIPALWEV EMGRSQGQEI ETILANRSHS DSTPLPNFLS GSHRPECCTC RLLTASGAQD<br/> 61 SLPFGRRLLYS GPWRSCEEVC HVSVLSVLST SCGLSLSLPI FPGWMEWLS P DIALPRRDEW<br/> 121 TQTSFARKRI THAKVQAGQ LRLSIDAQR VLLLHIEGK GLISKQPGTC DPYVKISLIP<br/> 181 EDSRLRHQKT QTVPD CRDPA FHEHFFFPVQ EEDDQKRLLV TVWNRASQSR QSGLIGCMSF<br/> 241 GVKSLLPDPK EISGWYLLG EHLGRTKHLK VARRRLRPLR DPLLRMPGGG DTENGKLLKI<br/> 301 TIPRGKDGFG FTICCDSPVR VQAVDSGGPA ERAGLQQLDT VLQLNEREVE HWKCVELAHE<br/> 361 IRSCPSEIIL LVWRMVPQVK PGPDGGVLR ASCKSTHDLQ SPPNKREKNC THGVQARPEQ<br/> 421 RNSCHLVCD S DGLLLGGWE RYTEVAKRGG QHTLPALSRA TAPTDPNYII LAPLNPGSQL<br/> 481 LRPVYQEDTI PEESGSPSKG KSYTGLGKKS RLMKTVQTMK GHGNYQNCV V RPHATHSSY<br/> 541 GTYVTLAPKV LVFPVFVQPL DLCNPARTLL LSEELLYEG RNKAAEVLTF AYSDLLLFTK</p>                                                                                                                                                                                                                                                                                                                                                                                                                                                                                                                                                                                                                                                                                                                                                                                                                                                                                                                                                                                                                                                                                                                                                                                                                                                                                                                                                                                                                                                                                                                                                                                                                                                                                                                                                                                                                                                                                                                                                                                                                                                                                                                                                                                                                                                                                                                                                                                                                                                                                                                                                                             |  |

|                                                                                                                                                                                                                                                                                                                                                                                                                                                                                                                                                                                                                                                                                                                                                                                                                                                                                                                                                                                                                                                                                                                                                                                                                                                                                                                                                                                                                                                                                                                                                                                                                                                                                                                                                                                                                                                                                                                                                                                                                                                                                                                                                                                                                                                             |                                                                                                                                                                                                                                                                                                                                                                                                                                                                                                                                                                                                                                                                                                                                                                                                                                                                                                                                                                                                                                                                                                                                                                                                                                                                                                                                                                                                                                                                                                                                                                                                                                                                                                                                                                                                                                                                                                                                                                                                                                                                                                                                                   |
|-------------------------------------------------------------------------------------------------------------------------------------------------------------------------------------------------------------------------------------------------------------------------------------------------------------------------------------------------------------------------------------------------------------------------------------------------------------------------------------------------------------------------------------------------------------------------------------------------------------------------------------------------------------------------------------------------------------------------------------------------------------------------------------------------------------------------------------------------------------------------------------------------------------------------------------------------------------------------------------------------------------------------------------------------------------------------------------------------------------------------------------------------------------------------------------------------------------------------------------------------------------------------------------------------------------------------------------------------------------------------------------------------------------------------------------------------------------------------------------------------------------------------------------------------------------------------------------------------------------------------------------------------------------------------------------------------------------------------------------------------------------------------------------------------------------------------------------------------------------------------------------------------------------------------------------------------------------------------------------------------------------------------------------------------------------------------------------------------------------------------------------------------------------------------------------------------------------------------------------------------------------|---------------------------------------------------------------------------------------------------------------------------------------------------------------------------------------------------------------------------------------------------------------------------------------------------------------------------------------------------------------------------------------------------------------------------------------------------------------------------------------------------------------------------------------------------------------------------------------------------------------------------------------------------------------------------------------------------------------------------------------------------------------------------------------------------------------------------------------------------------------------------------------------------------------------------------------------------------------------------------------------------------------------------------------------------------------------------------------------------------------------------------------------------------------------------------------------------------------------------------------------------------------------------------------------------------------------------------------------------------------------------------------------------------------------------------------------------------------------------------------------------------------------------------------------------------------------------------------------------------------------------------------------------------------------------------------------------------------------------------------------------------------------------------------------------------------------------------------------------------------------------------------------------------------------------------------------------------------------------------------------------------------------------------------------------------------------------------------------------------------------------------------------------|
| <p>601 EDEPGRCDVL RNPLYLQSVK LQEGSSEDLK FCVLYLAEKA ECLFTLEAHS QEQQKRVWCW<br/> 661 LSENIAKQQQ LAASPPDSKM FETEADKRE MALEEGKGGP AEDSPPSKEP SPGQELPPGQ<br/> 721 DLPPNKDSSQ GQEPAPSQEP LSSKDSATSE GSPPGPDAPP SKDVPPCQEP PPAQDLSFCQ<br/> 781 LPPAGQEPLP HQDPLLTKDL PAIQESPTRD LPPCQDLPPS QVSLPAKALT EDTMSSGDLL<br/> 841 AATGDPPAAP RPAFVIPEVR LDSTYSQKAG AEQGCSDGDE DAEAEAEVEE GEGEEDDEDE<br/> 901 DTSDNYGER SEAKRSSMIE TGQGAEGGLS LRVQNSLRRT THSEGSLLQE PRGPCFASDT<br/> 961 TLHCSGDEGA ASTWGMPPSP TLKKELGRNG GSMHHSLLFF TGHKRMGAD TVGDDDEASR<br/> 1021 KRKSKNLAKD MKNKLGIFRR RNESEPGAPP GKADKMMKSF KPTSEALGW GESLEKLLVH<br/> 1081 KYGLAVFQAF LRTEFSEENL EFWLACEDFK KVKSQSKMAS KAKKIFAEYI AIQACKEVNL<br/> 1141 DSYTREHTKD NLQSVTRGCF DLAQKRIFGL MEKDSYPRFL RSDLYLDLIN QKKMSPPL</p> <p>&gt;gi 67477383 sp P49796.2 RGS3_HUMAN RecName: Full=Regulator of G-protein signaling 3; Short=RGS3; Short=RGP3</p> <p>MPVIPALWEVEMGRSQGQEIETILANRSHSDSTPLPNFLSGSHRPECCTCRLLTASGAQDLSLPPGRRLYS<br/> GPWRSCCEEVCHVSVLSVLSVSTSCGLSLSLPIFPGWMEWLSPIALPRRDEWTQTSPARKRITHAKVQAGQ<br/> LRLSIDAQRVLLLIIEGKGLISKQPGTCDPYVKISLIPEDSRLRHQKTQTPVPCDRDPAFHEHFFFPVQ<br/> EEDDQKRLVTVWNRASQSRQSGSLIGCMSFGVKSLLTPDKEISGWYLLGHEHLGRTHKHLKVARRRRLRPLR<br/> DPLLRLMPGGGDTENGKLLKITIPRKGDFGFTICCDSPVRVQAVDSGGPAERAGLQQLDVLQNLNERPVE<br/> HWKCVELAHEIRSCPSEIILLVWRMVPQVKGPDGGLVRRASCKSTHDLQSPPNKREKNCTHGVQARPEQ<br/> RHSCHLVCDSSDGLLGGWERYTEVAKRGGQHTLPALSRAATPDNYIILAPLNPQSGQLRVPVYQEDTI<br/> PEESGSPSKGKSYTGLGKKSRLMKTVQTMKGHGNQNCPPVVRPHATHSSYGYTVTLAPKVLVFPVFPVQPL<br/> DLCNPARTLLSEELLYEGRNKAEEVTLFAYSDDLFTKEDPEGRCDVLRNPLYLQSVKLEGSSEDLK<br/> FCVLYLAEKAECFLTEAHSQEQQKRVWCWLSENIAKQQQLAASPPDSKMFETEADKREMALEEGKGGP<br/> AEDSPPSKEPSPGQELPPGQDLPPNKDPSGQEPAPSQEPPLSSKDSATSESPGPDAPPKDVPPCQEP<br/> PPAQDLSFCQDLPPAGQEPLPHQDPLLTKDLPAIQESPTRDLPPCQDLPPS QVSLPAKALTEDTMSGGDLL<br/> AATGDPPAAPRPAFVIPEVRLDSTYSQKAGAEQGCSDGDEDAEAEAEVEE GEGEEDDEDEDTSDNYGER<br/> SEAKRSSMIE TGQGAEGGLSLRVQNSLRRTTHSEGSLLQEPRGPCFASDTTLHCSGDEGA ASTWGMPPSP<br/> TLKKELGRNGSGMHHSLLFF TGHKRMGADTVGDDDEASRKRKSKNLAKDMKNKLGIFRRRNESEPGAPP<br/> GKADKMMKSFKPTSEALKWGESLEKLLVHKYGLAVFQAF LRTEFSEENLEFWLACEDFKKVKSQSKMAS<br/> KAKKIFAEYIAIQACKEVNLDSYTREHTKDNLQSVTRGCFDLAQKRIFGLMEKDSYPRFLRSDLYLDLIN<br/> QKKMSPPL</p> | <p><b>Notes</b></p> <p>RGS3 is a GTPase activating protein that down-regulates signaling from heterotrimeric G-proteins by increasing the GTPase activity of the alpha subunits, thereby driving them into their inactive GDP-bound form. Down-regulates G-protein-mediated release of inositol phosphates and activation of MAP kinases. Binds EFNB1 and EFNB2. Binds the GNB1-GNG2 heterodimer. 6 isoforms of the human protein are produced by alternative splicing. In a confirmation of the Niu et al (2002) study, Ward et al (2005) report that Ser264 is the 14-3-3-binding site of RGS3, and not the previously-reported Ser496 in RSG3 (the latter being equivalent to Ser 434 in RGS7) (Benzing et al 2000). The S(264)A mutation resulted in the loss of RGS3 binding to 14-3-3, without affecting its ability to bind G alpha(q). Signalling studies showed that the S(264)A mutant was more potent than the wild-type RGS3 in inhibition of G-protein-mediated signalling. Note that the form studies by Ward et al (2005) was 519 amino acids long (isoform 1), and missing 679 amino acids compared with the longer canonical sequence shown here (isoform 3). Ser264 in isoform 1 is equivalent to Ser943 in isoform 3 (shown here).</p> <p><b>References to 14-3-3 binding to RGS3</b></p> <p>Niu J, Scheschonka A, Druey KM, Davis A, Reed E, Kolenko V, Bodnar R, Voyno-Yasenetskaya T, Du X, Kehrl J, Dulin NO. RGS3 interacts with 14-3-3 via the N-terminal region distinct from the RGS (regulator of G-protein signalling) domain. <i>Biochem J.</i> 2002 Aug 1;365(Pt 3):677-84</p> <p>Ward RJ, Milligan G. A key serine for the GTPase-activating protein function of regulator of G protein signaling proteins is not a general target for 14-3-3 interactions. <i>Mol Pharmacol.</i> 2005 Dec;68(6):1821-30</p> <p>Benzing, T., Yaffe, M.B., Arnould, T., Sellin, L., Schermer, B., Schilling, B., Schreiber, R., Kunzelmann, K., Leparc, G.G., Kim, E. and Walz, G. (2000) 14-3-3 interacts with regulator of G protein signaling proteins and modulates their activity. <i>J. Biol. Chem.</i> 275, 28167–28172</p> |
| <p><b>Human rictor (AAS79796)</b></p> <p>1 MAAIGRGRSL KNLVRVRGND SGEENVPLDL TREPSDNLRE ILQNVARIQG VSNMRKLGHL<br/> 61 NNFTKLLCDI GHSEKLGPH YEDIICLRL ALLNEAKEVR AAGLRALRYL IQDSSILQKV<br/> 121 LKLKVDYLIA RCIDIQQSNE VERTQALRLV RKMITVNASL FPSSVTNSLI AVGNDGLQER<br/> 181 DRMVRACIAI ICELALQNEP VVALRGGGLT ILKNVIDCQL SRINEALITT ILHLLNHPKT<br/> 241 RQYVRADVEL ERILAPYTFD HYRHSPTDTE GQLKEDREAR FLASKMGIIA TFRSWAGIIN<br/> 301 LCKPNSGIQ SLIGVLCIPN MEIRRGLELV LYDIFRLPLP VVTEEFIEAL LSVDPGRFQD<br/> 361 SWRLSDGFVA AEAKTILPHR ARSRPDLMDN YLALILSAFI RNLGLEGLVE VITNSDDHIS<br/> 421 VRATILLGEL LHMANTILPH SHSHHLHCLP TLMNMAASFD IPKEKRLRAS AALNCLKRFH<br/> 481 EMKKRGPKPY SLHLDHIIQK AIATHQKRDQ YLRVQKDIFI LKDTTEALLI NLRDSQVLQH<br/> 541 KENLEWNNWL IGTILKWPNV NLRNYKDEQL HRFVRRLLYF YKPSKLYAN LDLDFAKAKQ<br/> 601 LTVVGCQFTE FLLESEEDGQ GYLEDLVKDI VQWLNASSGM KPERSLQNGG LLTTLQSHYF<br/> 661 LFIGTLSCHP HGVKMLEKCS VFQCLLNLCV LKNQDHLKLL TSSLDYSRD GLARVILSKI<br/> 721 LTAATDACRL YATKHLRVLL RANVEFFNNW GIELLVTLQH DKNKTISSEA LDILDEACED<br/> 781 KANLHALIQM KPALSHLGDK GLLLLRFLS IPKGFSYLNE RGVAKQLEK WHREYNSKYV<br/> 841 DLIEEQLNEA LTTYRKPVGD DNYVRRSNQR LQRPHVYLPY HLYGQVHKK TGCHLLEVQN<br/> 901 IITELCRNVR TPDLKWEIE KKLKASLWAL GNIGSSNWGL NLLQEENVIP DILKLAQCE<br/> 961 VLSIRGTCVY VLGLIAKTKQ GCDILKCHNW DAVRHSRKHV WPVVPDDVEQ LCNELSSIPS<br/> 1021 TSLNSESTS SRHNSSES V PSSMFILEDD RFGSSSTSTF FLDINEDTEP TFYDRSGPIK<br/> 1081 DKNSFFFFAS SKLVKNRILN SLTLPNKKHR SSSDPKGGKL SSESKTSNRR IRTLPEPSVD<br/> 1141 FNHSDDFTPI STVQKTLQLE TSFMGNKHIE DTGSTPSIGE NDLKFTKNFG TENHRENTSR<br/> 1201 ERLVVESSTS SHMKIRSQSF NTDTTTSGIS SMSSSPSRET VGVDAATMDT DCGSMSTVVS<br/> 1261 TKTIKTSHYL TPQSNHLSLS KSNVSLVPP GSSHTLPRRA QSLKAPS IAT IKS LADCNFS<br/> 1321 YTSSRDAFGY ATLKRLLQQQR MHPSLSHSEA LASPAKDVLV TDTITMKANS FESRLTPSRF<br/> 1381 MKALSYASLD KEDLLSPINQ NTLQRSSSVR SMVSSATYGG SDDYIGLALP VDINDIFQVK<br/> 1441 DIPYFQTKNI PPHDDRARA FAHDAGGLPS GTGGVLKNSF HLLRQQMSLT EIMNSIHSDA</p>                                                                                                                                                                                                                                                                       |                                                                                                                                                                                                                                                                                                                                                                                                                                                                                                                                                                                                                                                                                                                                                                                                                                                                                                                                                                                                                                                                                                                                                                                                                                                                                                                                                                                                                                                                                                                                                                                                                                                                                                                                                                                                                                                                                                                                                                                                                                                                                                                                                   |

1501 SLFLESTEDT GLQEHTDDNC LYCVCIIEILG FQPSNQLSAI CSHSDFQDIP YSDWCEQTIH  
 1561 NPLEVVPKSF SGISGCDGVS QEGSASSTK STELLLGVKT IPDDTPMCRI LLRKEVLRV  
 1621 INLSSSVSTK CHETGLLTIK EKYPQTFDDI CLYSEVSHLL SHCTFRLPCR RFIQELFQDV  
 1681 QFLQMHEEAE AVLATPPKQP IVD TSAES

>gi|46093886|gb|AAS79796.1| rapamycin insensitive companion of mTOR; rictor [Homo sapiens]

MAAIGRGRSLKNLRVGRNDSGEENVPLDLTREPNDLREILQNVARLQGVSNMRKLGHLNFTKLLCDI  
 GHSEKLGFIHYEDIIICLRLLALLNEAKEVRAAGLRALRYLIQDSSILQKVLKLVYLIARCIDIQSNE  
 VERTQALRLVRKMITVNASLFPSSVTNSLIAVGNLQERDRMVRACIAICELALQNPEVVALRGLNT  
 ILKNVIDCQLSRINEALITITLHLLNHPKTRQYVRADVELEILAPYTDHFYRHSPTAEGQLKEDREAR  
 FLASKMGIATFRSWAGIINLCKPGNSGIQSLIGVLCIPNMEIRRGLELVYDIFRLPLPVVTEEFIEAL  
 LSVDPGRFQDSWRSLSDGFVAEAKTILPHRARSRPDLMDNYLALILSAFIRNGLLEGLVEVITNSDDHIS  
 VRATILLGELLHMANTILPHSHSHHLHCLPTLMNMAASFDIPKEKRLRASAALNCLKRFHEMKKRGPKY  
 SLHLHDIIQKAIATHQKRDQYLRVQKDFIILKDTAEALLINLRDSQVLQHKENLEWNNWNLIGTILKWPNV  
 NLRNYKDEQLHRFVRRLLYFYKPSKLYANLDDLFAKAKQLTVVGCQFTEFLESEEDGGYLEDLVKDI  
 VQWLNASSGMKPERSLQNLGLLTLTSHYFLFIGTLSCHPHGVKMLEKCSVFQCLLNLCSLKNQDHLKL  
 TVSSLDYSRDLARVILSKILTAADACRLYATKHLRVLLRANVEFFNNGWIELLVTQLHDKNKTISSSEA  
 LDILDEACEDKANLHALIQMKPALSHLGDGKGLLLLRFLSPKGFYSYLNERYGVAKQLEKWHREYNSKYV  
 DLIEEQLNEALTYRKPVDGDNVYRRSNQRLQRPHVYLPILHYGQLVHHKTGCHLLEVQNIITELCRNVR  
 TPDLDKWEETKLLKASLWALGNISSNWGLNLQENVIPIILKLAQCEVLSIRGTCVYVGLIAKTKQ  
 GCDILKCHNWDVAVRHSRKHLPVVPDDVEQLCNELSSIPSTLSLNESTSSRHSESESVSPSMFILEDD  
 RFGSSSTSTFFLDINEDTEPTFYDRSGPIKDKNSPFFASAKLVKNRILNSLTLPNKKHRSSSDPKGGKL  
 SSESKTNRRIITLTPESVDFNHSDDFTPISTVQKTLQLETSFMGNKHIEDTGSTPSIGENDLKFTKNFG  
 TENHRENTSRERLVVSSSTSHMKIRSQSFNDDTTSGISSSSPSRETVGVADATMDTDCGSMSTVVS  
 TKTIKTSHYLTPQSNHLSLSKSNVSLVPPGSSHTLPRRAQSLKAPSIATIKSLADCNFSYTSRDAFGY  
 ATLLRQLQQRMHPSLSHSEALASPAKDVLTDTITMKANSFESRLTPSRFMKALSASLDKEDLLSPINQ  
 NTLQRSSSVRMSVSSATYGGSDDYIGLALPVDINDIFQVKDIPYFQTKNIPPHDDRGAFAHADAGGLPS  
 TGTGLVKNSEFHLRQMSLTIEMNSIHSASLFLFLESTEDTGLQEHTDDNCLYCVCIIEILGFQPSNQLSAI  
 CSHSDFQDIPYSDWCEQTIHNPLEVVPKSFSGISGCDGVSQEGSASSTKSTELLGKVTIPDDTPMCRI  
 LLRKEVLRVINLSSSVSTKCHETGLLTIKPKYQTFDDICLYSEVSHLLSHCTFRLPCRRIQELFQDV  
 QFLQMHEEAEAVLATPPKQPIVD TSAES

**Notes**  
 Thr1135 RIRTL(pT)EPSVD (numbering for full-length human rictor)  
**References to 14-3-3 binding to rictor**  
 Dibble CC, Asara JM, Manning BD. Characterization of Rictor phosphorylation sites reveals direct regulation of mTOR complex 2 by S6K1. *Mol Cell Biol.* 2009 Aug 31. [Epub ahead of print]  
 Treins C, Warne PH, Magnuson MA, Pende M, Downward J. Rictor is a novel target of p70 S6 kinase-1. *Oncogene.* 2009 Nov 23. [Epub ahead of print]

**Human RIMS1** Rim1 alpha (Swissprot = Q86UR5)

1 MSSAVGPRGP RPPTVPPPMQ ELPDLSHLTE EERNIIMAVM DRQKEEEEEKE EAMLKCVVRD  
 61 MAKPAACKTP RNAENQPHQP SPRLHQQFES YKEQVRKIGE EARRYQGEHK DDAPTCCGICH  
 121 KTKFADGCGH LCSYCRKFC ARCGGRVSLR SNNEDKVMW VCNLCRKQQE ILTKSGAWFF  
 181 GSGPQTSQD GTLSDTATGA GSEVPREKKA RLQERSRSQT PLSTAAASSQ DAAPPSAPPD  
 241 RSKGAEPSSQ ALGPEQKQAS SRSRSEPPRE RKKTPGLSEQ NGKALKSER KRVPKTSAQP  
 301 VEGAVEERER KERRESRLE KGRSQDYPT PEKRDEGKAA DEEKQRKEED YQTRYRSDPN  
 361 LARYPVKPPP EEQQMRMHAR VSRARHERRH SDVALPRTEA GAALPEGKAG KRAPAAARAS  
 421 PPDSPRAYSA ERTAETRAPG AKQLTNHSPP APRHGPVPAE APELKAQEPL RKQSRDLDPSS  
 481 AVLMRKAKRE KVTMLRNS LSSDQSESVR PSPPKPHRSR RGGKKRQMSV SSSEEEGVST  
 541 PEYTSCEDEVE LESESVSEK DLDYYWLDPA TWHSRETSPI SSSHPVTWQPS KEGDRLIGRV  
 601 ILNKRTTMPK DSGALLGLKV VGGKMTDLGR LGAFITKVKK GSLADVGH L RAGDEVLEWN  
 661 GKPLPGATNE EVYNIILESK SEPQVEIIVS RPIGDIPIRI ESSHPPLESS SSSFESQKME  
 721 RPSISVISPT SPGALKDAPQ VLPQGSLSVKL WYDKVGHQLI VNVLQATDLP ARVDGRPRNP  
 781 YVKMYFLPDR SDKSKRRTKT VKKILEPKWN QTFVYSHVHR RDFRERMLEI TVVDQPRVQE  
 841 EESEFLGEIL IELETALLDD EPHWYKLQTH DESSLPLPQP SPFMPRRHHI GESSSKLQR  
 901 SQRISDSDIS DYEVDGIGV VPPVGYRSSA RESKSTTLTV PEQRTTTHHR SRSVSPHRGN  
 961 DQKPRSRRL NPVLRSLDE IHPTRRSRSP TRHHASRSR VDHRTDVS QYLSEQDSEL  
 1021 LMLPRAKRGP SAECLHTRH LVRHYKTLPP KMPLLQSSSH WNIYSSILPA HTKTKSVTRQ  
 1081 DISLHHECFN STVLRFTDEI LVSELQPFLL RARSASTNCL RPDTSLSHSPE RERGRWSPSL  
 1141 DRRRPPSPRI QIQHASPEN RHRSRKSERSS IQKQTRKGT SDAERVLPTC LSRRGHAAPR  
 1201 ATDQPVIRGK HPARSRSEH SSIRTLCMSH HLPVGGASAPP SPLLTRMHRQ RSPTQSPPAD  
 1261 TSFSSRRGRQ LPQVVRSGS IEQASLVVEE RTRQMKMKVH RFKQTTGSGS SQELDREQYS  
 1321 KYNIHKDQYR SCDNVSAKSS DSDVSDVSAI SRTSSASRLS STSFMSEQSE RPRGRISFT  
 1381 PKMQRRMGT SGRSIMKSTS VSGEMYTLEH NDGSQSDTAV GTVGAGGKKR RSSLSAKVVA  
 1441 IVSRRSRSTS QLSQTESGHK KLSSTIQRST ETGMAAEMRK MVRQPSREST DGSINSYSSE  
 1501 GNLIFFGVRL GADSQFSDFL DGLGPAQLVG RQTLATPAMG DIQIGMEDKK GQLEVEVIRA  
 1561 RSLTQKPGSK STPAPYVKVY LLENGACIAK KKTRIARKTL DPLYQQLVLF DESPQGVVQ  
 1621 VIVWGDYGRM DHKCFMGVAQ ILLEELDLSS MVIGWYKLF PSSLVDPTLT PLTRRASQSS  
 1681 LESSTGPPCI RS

>gi|34395763|sp|Q86UR5.1|RIMS1\_HUMAN RecName: Full=Regulating synaptic membrane exocytosis protein 1; AltName: Full=Rab3-interacting molecule 1; Short=RIM 1

MSSAVGPRGPRPPTVPPPMQELPDLSHLTEEERNIIMAVMDRQKEEEEEKEEAMLKCVVRDMAKPAACKTP  
 RNAENQPHQPSPRLHQQFESYKEQVRKIGE EARRYQGEHKDDAPTCCGICHKTKFADGCGHLCSYCRKFC  
 ARCGGRVSLRSNNEDKVMWVCNLCRKQQEILTKSGAWFFGSGPQTSQDGTLSDTATGAGSEVPREKKA  
 RLQERSRSQTPLSTAAASSQDAAPPSAPPDRSKGAEPSSQALGPEQKQASSRSRSEPPRERKKTPLGLSEQ  
 NGKALKSERKRVPKTSAQPEGAVEERERKERRESRLEKGRSQDYPTPEKRDEGKAADEEKQRKEED

|                                                                                                                                                                                                                                                                                                                                                                                                                                                                                                                                                                                                                                                                                                                                                                                                                                                                                                                                                                                                                                                                                                                                                                                                                                                                                                                                                                                                                                                                                                                                                                                                                                                                                                                                                                                                                                                                                                                                                                                                                                                                                                                                                                                                                                                                                                                                                                                                                                                                                                                                                                                                                                                                                                                                                                                                                                                                                                                                                                                                                                                                                                                                                                                                                                                                                                                                                                                                                                                                                                                                                                                                                                                                                                                                                                                                                                                                                                                                                                                                                                                                                                                                                                                                                                                                                                  |  |
|--------------------------------------------------------------------------------------------------------------------------------------------------------------------------------------------------------------------------------------------------------------------------------------------------------------------------------------------------------------------------------------------------------------------------------------------------------------------------------------------------------------------------------------------------------------------------------------------------------------------------------------------------------------------------------------------------------------------------------------------------------------------------------------------------------------------------------------------------------------------------------------------------------------------------------------------------------------------------------------------------------------------------------------------------------------------------------------------------------------------------------------------------------------------------------------------------------------------------------------------------------------------------------------------------------------------------------------------------------------------------------------------------------------------------------------------------------------------------------------------------------------------------------------------------------------------------------------------------------------------------------------------------------------------------------------------------------------------------------------------------------------------------------------------------------------------------------------------------------------------------------------------------------------------------------------------------------------------------------------------------------------------------------------------------------------------------------------------------------------------------------------------------------------------------------------------------------------------------------------------------------------------------------------------------------------------------------------------------------------------------------------------------------------------------------------------------------------------------------------------------------------------------------------------------------------------------------------------------------------------------------------------------------------------------------------------------------------------------------------------------------------------------------------------------------------------------------------------------------------------------------------------------------------------------------------------------------------------------------------------------------------------------------------------------------------------------------------------------------------------------------------------------------------------------------------------------------------------------------------------------------------------------------------------------------------------------------------------------------------------------------------------------------------------------------------------------------------------------------------------------------------------------------------------------------------------------------------------------------------------------------------------------------------------------------------------------------------------------------------------------------------------------------------------------------------------------------------------------------------------------------------------------------------------------------------------------------------------------------------------------------------------------------------------------------------------------------------------------------------------------------------------------------------------------------------------------------------------------------------------------------------------------------------------------|--|
| <p>YQTRYRSDPNLARYPVKPPPEEQQMRMHARVSRARHERHSDVALPRTEAGAALPEGKAGKRAPAARAS<br/> PPDSPRAYSAERTAEETRAPGAKQLTNHSPAPRHGVPVPAEAPLKAQEPLRKQSRDLPSSAVLMRKAKRE<br/> KVETPLRNDLSSDQSESLVSPKPKPHRSKRGGKQMSVSSSEEEGVSTPEYTSCEDEVELESESVSEK<br/> DLDDYWLDPATWHSRETSPISSHPVTWQPSKEGDRILGRVILNKRTTMPKDSGALLGLKVVGGKMTDLGR<br/> LGAFITKVKKGLADVVGHLAGDEVLEWNGKPLPGATNEEVYNIILESKSEPPQVEIIVSRPIGDIPIRIP<br/> ESSHPPLESSESSSSESQKMERPSISVISPTSPGALKDAPQVLPQGQLSVKLVYDKVGHQLIVNVLQATDLP<br/> ARVDGRPRNPYVKMYFLPDRSDKSKRRRTKTKVKKILEPKWNQTFVYSHVHRRDFRERMLEITVWDQPRVQE<br/> EESFEFLGELIELETTALLDDEPHWYKLTQTHDESSLPLPQSPFMPRRRHIGESSSSKQLQRSQRISDSDIS<br/> DYEVDGIGVVPVGYRSSARESSTTLTVPEQQRTTHHRSRSVSPHRGNDQGKPRSRLPNVPLQRSLE<br/> IHPTRRSRSPTRHHDASRSVDHRTDSDVSDQYLSEQDSELEMLPRAKRGRSAECLHTTRHLVVRHYKTLPP<br/> KMPLQLQSSSHWNIYSSILPAHTKTKSVTRQDISLHHECFNSTVLRFTDEILVSELQFPLDRARSASTNCL<br/> RPDTSLSHSPERERGRWSPSLDRRRPSPRIQIQHASPENDRHSRKSERSSIQKQTRKGTASDAERVLPTC<br/> LSRRGHAAPRATDQPVIRGKHPARSRSSEHSSIRTLCMHHLVPGGSAPPFLLRMRHRQRSPTQSPPAD<br/> TSFSSRRGRQLPQVVRSGSIEQASLVVEERTROMKMKVHRFKQTGSGSSQELDREQYSKYNIHKDQYR<br/> SCDNVSAKSSDSDVSDVAISRTSSASRLSSTSFMEQSERPRGRISSTPKMQGRMGTSGRSIMGSTS<br/> VSGEMYTLEHNDGSDTAVGTVGAGGKRRSSLSAKVVAIVSRRSRSTSLQSLTESGHKKLKSTIQRST<br/> ETGMAEMRMKVRQPSRESTDGSINSYSSEGNLIFPGVRLGADSFDFLDGLGPAQLVGRQTLATPAMG<br/> DIQTGMEDKKGQLEVEVIRARSLTQKPGSKSTPAPYVKVYLLENGACIAKKKTRIAKKTLDPLYQQSLVF<br/> DESPQKVLQVIVWGDYGRMDHKCFMGVAQILLEELDSSMVIWGYKLFPPSSSLVDPTLPLTRRASQSS<br/> LESSTGPPCIRS</p>                                                                                                                                                                                                                                                                                                                                                                                                                                                                                                                                                                                                                                                                                                                                                                                                                                                                                                                                                                                                                                                                                                                                                                                                                                                                                                                                                                                                                                                                                                                                                                                                                                                                                                                                                                                                                                                                                                                                                                                                                                                                                                                                                                                                                                                                                                                                                                                                                                                                                                                                                                                                                                                                                                                                                                                           |  |
| <p><b>References to 14-3-3 binding (see RIMS2)</b></p>                                                                                                                                                                                                                                                                                                                                                                                                                                                                                                                                                                                                                                                                                                                                                                                                                                                                                                                                                                                                                                                                                                                                                                                                                                                                                                                                                                                                                                                                                                                                                                                                                                                                                                                                                                                                                                                                                                                                                                                                                                                                                                                                                                                                                                                                                                                                                                                                                                                                                                                                                                                                                                                                                                                                                                                                                                                                                                                                                                                                                                                                                                                                                                                                                                                                                                                                                                                                                                                                                                                                                                                                                                                                                                                                                                                                                                                                                                                                                                                                                                                                                                                                                                                                                                           |  |
| <p><b>Human RIMS2</b> Regulating synaptic membrane exocytosis protein 2 (Rab3-interacting molecule 2) (RIM 2)<br/> Swissprot = Q9UQ26)</p> <p>1 MSAPVGRGR LAPIPAASQP PLQPEMPDLS HLTEEERKII LAVMDRQKKK VKEEHKQPLT<br/> 61 QWFFPFGITE LVNNVLQPPQ KQONEKEPQT KLHQQFEMYK EQVKKMGES QQQEQKQKGA<br/> 121 PTCGICHKTK FADGCGHNCS YCQTKFCARC GGRVSLRSNK VMWVCNLCRK QQEILTKSGA<br/> 181 WFYNSGSNTP QQPDKVLRG LRNEEAPQEK KPKLHEQTQF QGPGDLSVP AVEKRSRSHL<br/> 241 TRQHSIKNGS GVKHHIASDI ASDRKRSPSV SRDQNRDYQ REEREEYSQY ATSDTAMPRS<br/> 301 PSDYADRRSQ HEPQFYEDSD HLSYRDSNRR SHRHSKEYIV DDEDVESRDE YERQRREEEY<br/> 361 QSRYE<sup>5</sup>DPNL ARYPVKQPY EEQMRIHAEV SRARHERHRS DVSLANADLE DSRISMLRMD<br/> 421 RPSRQRSISE RRAAMENQRS YSMERTREAQ GPSSYAQRTT NHSPPTPRRS PLPIDRDPDLR<br/> 481 RTDLSLRKQHH LDPSSAVRKT KREKMETMLR NDSLSSDQSE SVRPPPKPH KSKKGGKMRQ<br/> 541 ISLSSSEEL ASTPEYTS CD DVEIESESVS EKGDQKQK KTSEQAVLSD SNTRSERQKE<br/> 601 MMYFGGHSLE EDLEWSEPQI KDSGVDTCSS TTLNEEHS SHS DKHPVTWQPS KDGDRILGRI<br/> 661 LLNKRLKDG VPRDSGAMLG LKVVGGKMT SGRLCAFITK VKKGLADTV GHLRPGDEVL<br/> 721 EQNGRLQGA TFEVYNIIL ESKPEQVEL VVSRPIGDI RPDSTHAQL ESSSSSFESQ<br/> 781 KMDRPSISVT SPMSPGMLRD VPQFLSGQLS IKLWFDKVGH QLIVTILGAK DLPSREDGRP<br/> 841 RNPYVKIYFL PDRSDKNKRR TKTVKKTLEP KWNQTFIYSP VHRREFRERM LEITLWDQAR<br/> 901 VREEESEFLG EILIELETAL LDDEPHWYKLT QTHDVSSLPL PHPSPYMPRR QLHGESPTRR<br/> 961 LQRSKRISDS EVSDYDCDDG IGVVSDYRHD GRDLQSSSTLS VPEQVMSSNH CSPSSGPHRV<br/> 1021 DVIGRTRSW SPSVPPQSRN VEQGLRGTRT MTGHYNTISR MDRHRVMDH YSPDRDRDCE<br/> 1081 AADRQPYHRS RSTEQRPLE RTTTRSRSTE RPDNLMSR PSLMTGRSAP PSPALSRSHP<br/> 1141 RTGSVQSTSP STPVAGRRGR QLPQLPPKGT LDRKAGGKLL RSTVQRSTET GLAVEMRNWM<br/> 1201 TRQASREST GSMNSYSSEGNLIFPGVRLA SDSQFDFLD GLGPAQLVGR QTLATPAMGD<br/> 1261 IQVGMMDKKG QLEVEIIRAR GLVVKPGSKT LPAPYVKVYL LDNGVCIACK KTKVARKTLE<br/> 1321 PLYQQLLSFE ESPQKVLQI IVWGDYGRMD HKSFMGVAQI LLEDELSNM VIGWFKLFPP<br/> 1381 SSLVDPTLAP LTRRASQSSL ESSTGPSYSR S</p> <p>&gt;gi 41019522 sp Q9UQ26.2 RIMS2_HUMAN RecName: Full=Regulating synaptic<br/> membrane exocytosis protein 2; AltName: Full=Rab3-interacting molecule 2;<br/> Short=RIM 2</p> <p>MSAPVGRGR LAPIPAASQP PLQPEMPDLS HLTEEERKII LAVMDRQKKK VKEEHKQPLT QWFFPFGITE<br/> LVNNVLQPPQ KQONEKEPQT KLHQQFEMYK EQVKKMGES QQQEQKQKGA PTCGICHKTK FADGCGHNCS<br/> YCQTKFCARC GGRVSLRSNK VMWVCNLCRK QQEILTKSGA WFYNSGSNTP QQPDKVLRGLRNEEAPQEK<br/> KPKLHEQTQF QGPGDLSVP AVEKRSRSHL TRQHSIKNGS GVKHHIASDI ASDRKRSPSV SRDQNRDYQ<br/> REEREEYSQY ATSDTAMPRS PSDYADRRSQ HEPQFYEDSD HLSYRDSNRR SHRHSKEYIV DDEDVESRDE<br/> YERQRREEEY QSRYE<sup>5</sup>DPNL ARYPVKQPY EEQMRIHAEV SRARHERHRS DVSLANADLE DSRISMLRMD<br/> RPSRQRSISE RRAAMENQRS YSMERTREAQ GPSSYAQRTT NHSPPTPRRS PLPIDRDPDLR RTDLSLRKQHH<br/> LDPSSAVRKT KREKMETMLR NDSLSSDQSE SVRPPPKPH KSKKGGKMRQ ISLSSSEELASTPEYTS CD<br/> DVEIESESVSEKGDQKQKKTSEQAVLSD SNTRSERQKEMMYFGGHSLE EDLEWSEPQI KDSGVDTCSS<br/> TTLNEEHS SHS DKHPVTWQPS KDGDRILGRI LLNKRLKDG VPRDSGAMLG LKVVGGKMT SGRLCAFITK<br/> VKKGLADTV GHLRPGDEVL EQNGRLQGA TFEVYNIIL ESKPEQVEL VVSRPIGDI RPDSTHAQL<br/> ESSSSSFESQ KMDRPSISVT SPMSPGMLRD VPQFLSGQLS IKLWFDKVGH QLIVTILGAK DLPSREDGRP<br/> RNPYVKIYFL PDRSDKNKRR TKTVKKTLEP KWNQTFIYSP VHRREFRERM LEITLWDQAR VREEESEFLG<br/> EILIELETAL LDDEPHWYKLT QTHDVSSLPL PHPSPYMPRR QLHGESPTRR LQRSKRISDS EVSDYDCDDG<br/> IGVVSDYRHD GRDLQSSSTLS VPEQVMSSNH CSPSSGPHRV DVIGRTRSW SPSVPPQSRN VEQGLRGTRT<br/> MTGHYNTISR MDRHRVMDH YSPDRDRDCE AADRQPYHRS RSTEQRPLE RTTTRSRSTE RPDNLMSR<br/> PSLMTGRSAP PSPALSRSHP RTGSVQSTSP STPVAGRRGR QLPQLPPKGT LDRKAGGKLL RSTVQRSTET<br/> GLAVEMRNWM TRQASREST GSMNSYSSEGNLIFPGVRLA SDSQFDFLD GLGPAQLVGR QTLATPAMGD<br/> IQVGMMDKKG QLEVEIIRAR GLVVKPGSKT LPAPYVKVYL LDNGVCIACK KTKVARKTLE PLYQQLLSFE<br/> ESPQKVLQI IVWGDYGRMD HKSFMGVAQI LLEDELSNM VIGWFKLFPPSSSLVDPTLAP LTRRASQSSL<br/> ESSTGPSYSR S</p> <p><b>Notes</b><br/> Two groups have found that forms of RIM1 bind to 14-3-3 (Simsek-Duran et al 2004 and Kaeser et al 2008). Also<br/> see a separate entry for RIM2, encoded by a different gene, which has been reported to be a 14-3-3 binding protein<br/> by Sun et al (2003).<br/> Kaeser et al (2008) report the 14-3-3-binding site to be RRHpS<sup>413</sup>DVAL (Ser391 in Q86UR5), which is a site</p> |  |

|                                                                                                                                                                                                                                                                                                                                                                                                                                                                                                                                                                                                                                                                                                                                                                                                                                                                                                                                                                                                                                                                                                                                                                                                                                                                                                                                                                                                                                                                                                                                                                                                                                                                                                                                                                                                                                                                                                                                                                                                                                                                                                                                                                                                                                                                                                                                                                                                                                                                                                                                                                                                                                                                                                                                                                                                                                                                                                                                                                                                                                                                                                                                                                                                                     |  |
|---------------------------------------------------------------------------------------------------------------------------------------------------------------------------------------------------------------------------------------------------------------------------------------------------------------------------------------------------------------------------------------------------------------------------------------------------------------------------------------------------------------------------------------------------------------------------------------------------------------------------------------------------------------------------------------------------------------------------------------------------------------------------------------------------------------------------------------------------------------------------------------------------------------------------------------------------------------------------------------------------------------------------------------------------------------------------------------------------------------------------------------------------------------------------------------------------------------------------------------------------------------------------------------------------------------------------------------------------------------------------------------------------------------------------------------------------------------------------------------------------------------------------------------------------------------------------------------------------------------------------------------------------------------------------------------------------------------------------------------------------------------------------------------------------------------------------------------------------------------------------------------------------------------------------------------------------------------------------------------------------------------------------------------------------------------------------------------------------------------------------------------------------------------------------------------------------------------------------------------------------------------------------------------------------------------------------------------------------------------------------------------------------------------------------------------------------------------------------------------------------------------------------------------------------------------------------------------------------------------------------------------------------------------------------------------------------------------------------------------------------------------------------------------------------------------------------------------------------------------------------------------------------------------------------------------------------------------------------------------------------------------------------------------------------------------------------------------------------------------------------------------------------------------------------------------------------------------------|--|
| <p>phosphorylated by PKA, and 14-3-3 binding was tested by mutagenesis and with truncation mutants. They also say that the serine-413 phosphorylation site of RIM1<math>\alpha</math> is conserved in RIM2<math>\alpha</math>.</p> <p>The S287A (RSR(pS287)EP), but not the S379A (RYR(pS379)DP) mutation reduced the Rim1-14-3-3 interaction, and RSR(pS241)QTP mutation further reduced the 14-3-3 binding. These findings indicate that 14-3-3 interacts with N-terminal Rim1 through two phosphorylated serines, Ser241 and Ser287 (Sun et al 2003). Defects in RIMS1 may be a cause of cone-rod dystrophy type 7 (CORD7) [MIM:603649].</p> <p><b>Rim2</b> is encoded by a different gene from RIM1, and contains a potential consensus site for 14-3-3 binding, RYRS335DP, and another site that has similarities to a consensus site, RSPS238VS. Binding to 14-3-3 was strongly reduced by the S335A mutation, whereas no change was observed for the S238A mutation (Sun et al 2003). The Ser335 in Sun et al (2003) is equivalent to Ser366 in Q9UQ26.</p> <p><b>References to 14-3-3 binding to RIMS1 and RIMS2</b></p> <p>Kaaser PS, Kwon HB, Blundell J, Chevaleyre V, Morishita W, Malenka RC, Powell CM, Castillo PE, Südhof TC. RIM1<math>\alpha</math> phosphorylation at serine-413 by protein kinase A is not required for presynaptic long-term plasticity or learning. <i>Proc Natl Acad Sci U S A</i>. 2008 Sep 23;105(38):14680-5.</p> <p>Simsek-Duran F, Linden DJ, Lonart G. Adapter protein 14-3-3 is required for a presynaptic form of LTP in the cerebellum. <i>Nat Neurosci</i>. 2004 Dec;7(12):1296-8</p> <p>Sun L, Bittner MA, Holz RW. Rim, a component of the presynaptic active zone and modulator of exocytosis, binds 14-3-3 through its N terminus. <i>J Biol Chem</i>. 2003 Oct 3;278(40):38301-9.</p>                                                                                                                                                                                                                                                                                                                                                                                                                                                                                                                                                                                                                                                                                                                                                                                                                                                                                                                                                                                                                                                                                                                                                                                                                                                                                                                                                                         |  |
| <p><b>Human Rin1</b> Ras and Rab interactor 1 (RAS effector/interference protein 1) (Swissprot = Q13671)</p> <pre> 1  MESPGESGAG SPGAPSPSSF TTGHLAREKP AQDPLYDVFN ASGGQAGGPQ RPRGRVVSRLRE 61  RLLLTRPVWL QLQANAAAAL HMLRTEPPGT FLVRKSNTRQ CQALCMRLPE ASGSPFVSSH 121 YILESPGGVS LEGSELMFPD LVQLICAYCH TRDILLPLQ LPRAIHHAAT HKELEAISHL 181 GIEFWSSSLN IKAQRGPAGG PVLPLQKARS PQELDQGTGA ALCFFNPLFP GDLGPTKREK 241 KFRSFKVRSV TETSSPLSPV AVPPPPVPL PGAVPSQTER LPQCQLRRE SSVGYRVPAG 301 SGPSLPPMPS LQEVDCGSPS SSEEVGPVGS RGSFATSPHL GRRRPLLRSM SAAFCSLLAP 361 ERQVGRAAAA LMQDRHTAAG QLVQDLLTQV RAGPEPQELQ GIRQALSRRR AMLSABLGP 421 KLLSPKRLEH VLEKSLHCSV LKPLRPILAA RLRRRLAADG SLGRLAEGLR LARAQGPAGF 481 GSHLSLPSPV ELEQVRQKLL QLLRTYSPSA QVKRLLQACK LLYMALRTQE GEGAGADEFL 541 PLLSLVLAHC DLPELLLEAE YMSELLEPSL LTGEGGYLT SLSASLALLS GLGQAHTLPL 601 SPVQELRRSL SLWEQRRLLP THCFQHLLRV AYQDPSSGCT SKTLAVPPEA SIATLNQLCA 661 TKFRVTQPNF FGLFLYKEQG YHRLPPGALA HRLPTTGYLV YRRAEWPETQ GAVTEEEGSG 721 QSEARSRGEE QGCQGDGDAG VKASPRDIRE QSETTAEGGQ GQAQEGPAQP GEPEAEGSRA 781 AEE </pre> <p>&gt;gi 116242760 sp Q13671.4 RIN1_HUMAN RecName: Full=Ras and Rab interactor 1; AltName: Full=Ras interaction/interference protein 1; AltName: Full=Ras inhibitor JC99</p> <p>MESPGESGAGSPGAPSPSSFTTGHAREKPAQDPLYDVFNASGGQAGGPQRPRGRVVSRLRERLLLTRPVWL QLQANAAAALHMLRTEPPGTFLVRKSNTRQCQALCMRLPEASGSPFVSSH YILESPGGVSLEGSELMFPD LVQLICAYCHTRDILLPLQLPRAIHHAATHKELEAISHL GIEFWSSSLNIKAQRGPAGGPVLPQKARS PQELDQGTGAALCFNPLFPQDGLGPTKREKFKRSFKVRSV TETSSPLSPAVPPPPVPLPGAVPSQTER LPQCQLRRESSVGYRVPAGSGPSLPPMPSLQEVDCGSPSSSEEVGPVGSRGSPATSPHLGRRRPLLRSM SAAFCSLLAPERQVGRAAAAALMQRHTAAGQLVQDLLTQVRAGPEPQELQGIRQALSRRRAML SABLGP KLLSPKRLEHVLEKSLHCSV LKPLRPILAA RLRRRLAADGSLGRLAEGLRLARAQGPAGF GSHLSLPSPV ELEQVRQKLLQLLRTYSPSAQVKRLLQACKLLYMALRTQE GEGAGADEFL PLLSLVLAHC DLPELLLEAE YMSELLEPSLLTGEGGYLT SLSASLALLSGLGQAHTLPLSPVQELRRSLSLWEQRRLLP THCFQHLLRV AYQDPSSGCTSKTLAVPPEAS IATLNQLCATKFRVTQPNF FGLFLYKEQGYHRLPPGALAHRLPTTGYLV YRRAEWPETQGAVTEEEGSGQSEARSRGEEQGCQGDGDAGVKASPRDIRE QSETTAEGGQ GQAQEGPAQP GEPEAEGSRAAEE</p> <p><b>Notes</b><br/>RSM(pS351)AA</p> <p><b>References to 14-3-3 binding to RIN1</b></p> <p>Wang Y, Waldron RT, Dhaka A, Patel A, Riley MM, Rozengurt E, Colicelli J. The RAS effector RIN1 directly competes with RAF and is regulated by 14-3-3 proteins. <i>Mol Cell Biol</i>. 2002 Feb;22(3):916-26.</p> <p>Senda K, Goi T, Hirono Y, Katayama K, Yamaguchi A. Analysis of RIN1 gene expression in colorectal cancer. <i>Oncol Rep</i>. 2007 May;17(5):1171-5.</p> <p>Tall GG, Barbieri MA, Stahl PD, Horazdovsky BF. Ras-activated endocytosis is mediated by the Rab5 guanine nucleotide exchange activity of RIN1. <i>Dev Cell</i>. 2001 Jul;1(1):73-82.</p> <p>Han L, Wong D, Dhaka A, Afar D, White M, Xie W, Herschman H, Witte O, Colicelli J. Protein binding and signaling properties of RIN1 suggest a unique effector function. <i>Proc Natl Acad Sci U S A</i>. 1997 May 13;94(10):4954-9.</p> <p>Fujioka M, Goi T, Hirono Y, Katayama K, Yamaguchi A. Cloning of a novel splicing variant of RIN1 and its expression in gastric and colon cancer. <i>Oncol Res</i>. 2009;17(11-12):593-9.</p> |  |
| <p><b>Human RNF11</b> RING finger protein 11 (Swissprot = Q9Y3C5)</p> <pre> 1  MGNCCLKSPTS DDISLLHESQ SDRASFGEGT EPDQEPPEPY QEQVPVPHYH PTPSQTRLAT 61  QLTEEEQIRI AQRIGLIQHL PKGVYDPRGD GSEKKIRECV ICMMDVFYGD PIRFLPCMHI 121 YHLDICDDWL MRSFCPSM EPVDAALLSS YETN </pre> <p>&gt;gi 21362884 sp Q9Y3C5.1 RNF11_HUMAN RecName: Full=RING finger protein 11; AltName: Full=Sid 1669</p> <p>MGNCCLKSPTSDDISLLHESQSDRASFGEGTEPDQEPPEPYQEQVPVPHYHPTPSQTRLATQLTEEEQIRI AQRIGLIQHLPKGVYDPRGDGSEKKIRECVICMMDVFYGDPIRFLPCMHIYHLDICDDWLMRSFTCPSCM EPVDAALLSSYETN</p> <p><b>Notes</b><br/>Component of a biquitin-editing protein complex, comprising also TNFAIP3, ITC and TAX1BP1, that ensures the transient nature of inflammatory signaling pathways. Interacts with several E2 and E3 ubiquitin ligases. "RNF11 contains an (AKT) phosphorylation site (T135) that is situated within a 14-3-3 binding domain." phosphorylation of RNF11 by AKT either causes its nuclear localization or induces degradation of cytoplasmic</p>                                                                                                                                                                                                                                                                                                                                                                                                                                                                                                                                                                                                                                                                                                                                                                                                                                                                                                                                                                                                                                                                                                                                                                                                                                                                                                                                                                                                                                                                                                                                                                                                                                                                                                                                                                                                                                                                                                                                                                                                                                                                                                                                                                                            |  |



|                                                                                                                                                                                                                                                                                                                                                                                                                                                                                                                                                                                                                                                                                                                                                                                                                                                                                                                                                                                                                                                                                                                                                                                                                                                                                                                                                                                                                                                                                                                                                                                                                                                                                                                                                                                                                                                                                                                                                                                                                                                                                                                                                                                                                                                                                                                                                                                                                                                                                                                                                                                                                                                         |  |
|---------------------------------------------------------------------------------------------------------------------------------------------------------------------------------------------------------------------------------------------------------------------------------------------------------------------------------------------------------------------------------------------------------------------------------------------------------------------------------------------------------------------------------------------------------------------------------------------------------------------------------------------------------------------------------------------------------------------------------------------------------------------------------------------------------------------------------------------------------------------------------------------------------------------------------------------------------------------------------------------------------------------------------------------------------------------------------------------------------------------------------------------------------------------------------------------------------------------------------------------------------------------------------------------------------------------------------------------------------------------------------------------------------------------------------------------------------------------------------------------------------------------------------------------------------------------------------------------------------------------------------------------------------------------------------------------------------------------------------------------------------------------------------------------------------------------------------------------------------------------------------------------------------------------------------------------------------------------------------------------------------------------------------------------------------------------------------------------------------------------------------------------------------------------------------------------------------------------------------------------------------------------------------------------------------------------------------------------------------------------------------------------------------------------------------------------------------------------------------------------------------------------------------------------------------------------------------------------------------------------------------------------------------|--|
| <p>RNF11. In addition, T135E RNF11, which does not bind 14-3-3 and is not phosphorylated by AKT, causes a greater enhancement of transforming growth factor-beta signaling than wild-type RNF11.</p> <p><b>References to 14-3-3 binding to RNF11</b><br/> Connor MK, Azmi PB, Subramaniam V, Li H, Seth A. Molecular characterization of ring finger protein 11. <i>Mol Cancer Res.</i> 2005 Aug;3(8):453-61<br/> Azmi P, Seth A. RNF11 is a multifunctional modulator of growth factor receptor signalling and transcriptional regulation. <i>Eur J Cancer.</i> 2005 Nov;41(16):2549-60</p>                                                                                                                                                                                                                                                                                                                                                                                                                                                                                                                                                                                                                                                                                                                                                                                                                                                                                                                                                                                                                                                                                                                                                                                                                                                                                                                                                                                                                                                                                                                                                                                                                                                                                                                                                                                                                                                                                                                                                                                                                                                            |  |
| <p><b>Human RPH3A</b> Rabphilin3 (Swissprot = Q9Y2J0)</p> <pre> 1 MTDTVFSNSS NRWMPSDRP LQSNQKEQLQ AGWSVHPGGQ PDRQRKQEEL TDEEKEI INR 61 VIARAEMKME MEQERIGRLV DRLENMRKNV AGDGVNRCIL CGEQLGMLGS ACVVCEDECKK 121 NVCTKCGVET NNRLHVSWLC KICIEQREVW KRSGAWFFKG FPKQVLPQPM PIKKTQPQP 181 VSEPAPEQP APEPKHPARA PARGDSEDRR GPGQKTGPD PASAPGRGNYG PPVRRASEAR 241 MSSSRDSES WDHSGGAGDS SRSPAGLRRR N5VQASRPAP GSVQSPAPPQ PGQPGTPGGS 301 RPPGPGAGRF PDQKPEVAPS DPGTTAPPRE ERTGGVGGYP AVGAREDRMS HPSGPGYSQAS 361 AAAPQFAAAR QPPPEEEEE EANSYDSDEA TTLGALEFSL LYDQDNSSLQ CTIIKAKGLK 421 PMDSNGLADP YVKLHLLPGA SKSNKLRTKT LRNTRNPIWN ETLVYHGITD EDMQRKTLRI 481 SVCDEDKFGH NEFIGETRF S LKKLKPQRK NFNICLERVI PMKRAGTGS ARGMALYEEE 541 QVERVGDIEE RGKILVSLMY STQGGGLIVG IIRCVHLAAM DANGYSDFV KLWLKPDGMK 601 KAKHKTQIKK KTLNPEFNEE FFYDIKHS DL AKKSLDISVW DYDIGKSDY IGGCQLGISA 661 KGERLKHWEY CLKNKDKKIE RWHQLQENNH VSSD </pre> <p>&gt;gi 13878745 sp Q9Y2J0.1 RP3A_HUMAN RecName: Full=Rabphilin-3A; AltName: Full=Exophilin-1</p> <p>MTDTVFSNSSNRWMPSDRPLQSNQKEQLQAGWSVHPGGQPDRQRKQEELTDEEKEIINRVIARAEMKME MEQERIGRLVDRLENMRKNVAGDGVNRCILCGEQLGMLGSACVVCEDECKKNVCTKCGVETNNRLHVSWLC KICIEQREVWKRSGAWFFKGFPPKQVLPQMPPIKKTQPQPVSEPAPEQPAPPEPKHPARAPARGDSEDRR GPGQKTGPD PASAPGRGNYGPPVRRASEARMSSSSRDSEWDHSGGAGDS SRSPAGLRRANSVQASRPAP GSVQSPAPPQPGQPGTPGGS RPPGPGAGRF PDQKPEVAPS DPGTTAPPRE ERTGGVGGYP AVGAREDRMS HPSGPGYSQASAAAPQFAAARQPPPEEEEE EANSYDSDEA TTLGALEFSL LYDQDNSSLQ CTIIKAKGLK PMDSNGLADPYVKLHLLPGASKSNKLRTKT LRNTRNPIWN ETLVYHGITD EDMQRKTLRISVCDEDKFGH NEFIGETRFSLKKLKPQRKNFNICLERVI PMKRAGTGS ARGMALYEEEE QVERVGDIEE RGKILVSLMY STQGGGLIVGIIRCVHLAAMDANGYSDFV KLWLKPDGMK KAKHKTQIKK KTLNPEFNEE FFYDIKHS DL AKKSLDISVW DYDIGKSDY IGGCQLGISAKGERLKHWEYCLKNKDKKIERWHQLQENNHVSSD</p> <p><b>Notes</b><br/> "Ser-234 and Ser-274 in Rabphilin3 are residues whose phosphorylation and dephosphorylation have been demonstrated to be dynamically regulated during high K<sup>+</sup>-induced membrane depolarization. Neither site (RRAS234EA and RANS274VQ, respectively) is a typical 14-3-3 binding motif. Mutant constructs with Ser-&gt;Ala mutations were tested for their ability to bind 14-3-3 in vitro. The S274A mutation but not the S234A mutation disrupted the interaction. (Sun et al 2003). The Ser274 pinpointed by Sun et al (2003) (species?) corresponds to Ser272 in Q9Y2J0.</p> <p><b>References to 14-3-3 binding to Rabphilin3</b><br/> Sun L, Bittner MA, Holz RW. Rim, a component of the presynaptic active zone and modulator of exocytosis, binds 14-3-3 through its N terminus. <i>J Biol Chem.</i> 2003 Oct 3;278(40):38301-9.</p> |  |
| <p><b>Human SASH1</b> Sterile alpha motif and SH3 domain containing 1 (Swissprot = O94885)</p> <pre> 1 MEDAGAAGPG PEPEPEPEPE PEPAPPEPE PKPGAGTSEA FSRLWTDVMG ILDGSLGNID 61 DLAQQYADYY NTCFSDVCER MEELRKRVRs QDLEVEKPDASPTSLQLRSQ IEESLGFCSA 121 VSTPEVERKN PLHKSNS EDS SVGKGDWKKK NKYFWQNRK NQKIGMRQTS KGEDVGYVAS 181 EITMSDEERI QLMMMVKEKM ITIEEALARL KEYEAQHRQS AALDPADWPD GSYPTFDGSS 241 NCSNRSQSD ETEESVKFKR LHKLVNSTRR VRKCLRVEE MKKPSTEGGE EHVFNENFVL 301 DERSALYSGV HKKPLFFDGS PEKPPEDSD SLTSPSSSS LDTWGAGRKL VKTFSKGER 361 GLIKPPKMG TFFSYPEEEK AQKVSRLTE GEMKKGLGSL SHGRTCSFGG FDLTNRSLHV 421 GSNNSDPMGK EGFVYKEVI KSPTASRISL GKVKSVKET MRKRMSKKYS SSVSEQDSSL 481 DGMPPGSPPS QDPEHLDPK KLKAGGSVES LRSSLGQSS MSGQTVSTTD SSTSNNRESVK 541 SEDGDEEPP YRGPFGRAR VHTDFTPSY DTDSLKLKKG DIIDIISKPP MGTWMLLN 601 KVGTFKFIY DVLSEDEEK RPTRRRRKG RPPQPKSVED LLDRLINLKEH MPTFLFNGYE 661 DLDLTKLLEE EDLDELNIRD PEHRAVLLTA VELLQYEYDSN SDQSGSQEKL LVDSQGLSGC 721 SPRDSGCYES SENLENGKTR KASLLSAKSS TEP SLKSF SR NQLGNYP TL LMKSGDALKQ 781 QEEGRLLGG LAPDTSKSD PPGVTGLNKN RRS LPSV ICR SCETLEGPQT VDTWPRSHSL 841 DDLQVEPGA QDVPTEVTEP PPQIVPEVPQ KTTASSTKAQ PLEQDSAVDN ALLLTQSKRF 901 SEPQLTKTK LEGSIAASGR GLSPPQCLPR NYDAQPPGAK HGLARTPLEG HRKGHEFEGT 961 HHPLGTKEG DAEQRMQPKI PSQPPVPAK KSRERLANGL HPVPMGPSPA LPSDAPCLP 1021 VKRGSFASPT SPSDCPPALA PRPLSGQAPG SPPSTRPPFW LSELPEPNTSL QEHGVLKPGA 1081 LTRKVCARG VDLETLTENK LHAEGIDLTE EPYSDKHGRC GIPEALVQRY AEDLDQPERD 1141 VAANMDQIRV KQLRQHRMA IPSGGLTEIC RKPVSPGCIS SVSDWLISIG LPMYAGTLST 1201 AGFSTLSQVP SLSHTCLQEA GITEERHIRK LLSAARLFKL PPGPEAM </pre> <p>&gt;gi 145559526 sp O94885.3 SASH1_HUMAN RecName: Full=SAM and SH3 domain-containing protein 1; AltName: Full=Proline-glutamate repeat-containing protein</p> <p>MEDAGAAGPGPEPEPEPEPEPEPEPEPEPEPKPGAGTSEAFSRLWTDVMGILDGSLGNIDDLAQQYADYY NTCFSDVCERMEELRKRVRsQDLEVEKPDASPTSLQLRSQIEESLGFCSAVSTPEVERKNPLHKSNS EDS SVGKGDWKKKNKYFWQNRKNQKIGMRQTSKGEDVGYVASEITMSDEERIQLMMMVKEKMITIEEALARL KEYEAQHRQSAALDPADWPDG SYPTFDGSSNCSNRSQSD ETEESVKFKRLHKLNVNSTRRVRKCLRVEE MKKPSTEGGEHVFNENFVLDERSALYSGVHKKPLFFDGSPEKPPEDSDSLTSPSSSSLDTWGAGRKL VKTFSKGERGLIKPKKMG TFFSYPEEEKAQKVSRLTEGEMKKGLGSLSHGRTCSFGGFDLTNRSLHV GSNNSDPMGKEGFVYKEVIKSPTASRISL GKVKSVKETMRKRMSKKYSSSVSEQDSSLGDMPPGSPPS QDPEHLDPKPKL KAGGSVESLRSSLGQSSMSGQTVSTTD SSTSNNRESVKSEDDGDEEPPYRGPFGRAR VHTDFTPSYDTDSLKLKKGDIIDIISKPPMGTWMLLNKVGTFKFIYDV LSEDEEKRPTRRRRKG</p>                                                                                                                                                                                                                    |  |

|                                                                                                                                                                                                                                                                                                                                                                                                                                                                                                                                                                                                                                                                                                                                                                                                                                                                                                                                                                                                                                                                                                                                                                                                                                                                                                                                                                                                                                                                                                                                                                                                                                                                                                                                                                                                                                                                                                                                                                                                                                                                                                                                                                                                                                                                                                                                                                                                                                                                                                                                                                                                                                                                                                                                                                                                                                                                                                                                                                                                                                                                                                                                                                                                                         |                 |
|-------------------------------------------------------------------------------------------------------------------------------------------------------------------------------------------------------------------------------------------------------------------------------------------------------------------------------------------------------------------------------------------------------------------------------------------------------------------------------------------------------------------------------------------------------------------------------------------------------------------------------------------------------------------------------------------------------------------------------------------------------------------------------------------------------------------------------------------------------------------------------------------------------------------------------------------------------------------------------------------------------------------------------------------------------------------------------------------------------------------------------------------------------------------------------------------------------------------------------------------------------------------------------------------------------------------------------------------------------------------------------------------------------------------------------------------------------------------------------------------------------------------------------------------------------------------------------------------------------------------------------------------------------------------------------------------------------------------------------------------------------------------------------------------------------------------------------------------------------------------------------------------------------------------------------------------------------------------------------------------------------------------------------------------------------------------------------------------------------------------------------------------------------------------------------------------------------------------------------------------------------------------------------------------------------------------------------------------------------------------------------------------------------------------------------------------------------------------------------------------------------------------------------------------------------------------------------------------------------------------------------------------------------------------------------------------------------------------------------------------------------------------------------------------------------------------------------------------------------------------------------------------------------------------------------------------------------------------------------------------------------------------------------------------------------------------------------------------------------------------------------------------------------------------------------------------------------------------------|-----------------|
| <p>RPPQPKSVEDLLDRINLKEHMPFLLFNGYEDLDTFKLLEEDLDELNIRDPEHRAVLLTAVELLQEYDSN<br/>SDQSGSQEKLLVDSQGLSGCSPRDSGCVESSENLENGKTRKASLLSAKSSTEPFLKFSFRNQLGNYPTLP<br/>LMKSGDALKQGEGLRGGGLADPTSKSCDPGVTGLNKNRRSLPVSICRSCETLEGPQTVDTPRSHSL<br/>DDLQVEPGAQDQVTEVTEPPQIVPEVPPQKTASSTKAQPLEQSDAVDNALLLTQSKRFSEPPQKLTTK<br/>LEGSIAASGRGLSPQCLPRNYDAQPPGAKHGLARTPLEGHRKGFHEFEGTHHPLGTKEGVDQAEQRMQPKI<br/>PSQPPVPAKKSRELRANGLHPVPMGPGSGLPSPDAPCLPVKRGSPASPTSPSDCPPALAPRPLSGQAPG<br/>SPPSTRPPWLSLEPENTSLQEHGKLGALTRKVCARGVDLETLTENKLAEGIDLTEEPYSDKHGRC<br/>GIPEALVQRYAEDLDQPERDVAANMDQIRVKQLRQHRMAIPSGGLTEICRKPVS PGCISVSDWLISIG<br/>LPMYAGTLSTAGFSTLSQVPSLSHTCLQEAGITEERHIRKLLSARLFLKLPFGPEAM</p> <p><b>Notes</b><br/>RKRRV(PS90)QD provides on of the 14-3-3-binding sites on this protein.</p> <p><b>References to 14-3-3 binding to SASH1</b><br/>Dubois F, Vandermoere F, Gernez A, Murphy J, Toth R, Chen S, Geraghty KM, Morrice NA and MacKintosh C (2009) Differential 14-3-3-affinity capture reveals new downstream targets of PI 3-kinase signaling (Epub 2009 Aug 1)</p>                                                                                                                                                                                                                                                                                                                                                                                                                                                                                                                                                                                                                                                                                                                                                                                                                                                                                                                                                                                                                                                                                                                                                                                                                                                                                                                                                                                                                                                                                                                                                                                                                                                                                                                                                                                                                                                                                                                                                                                                                                                                                                                                                          |                 |
| <p><b>Human SH3BP2</b> SH3-domain binding protein 2 (Swissprot = P78314)</p> <p>1 MAAEEMHWPV PMKAIQAQNL LTMPPGGVAKA GYLHKKGGTQ LQLLKWPLRF V I I H K R C V V Y<br/>61 FKSSTSASPQ GAFSLSGYNR VMRAAEETTS NNVFPFKIIH ISKKHRTWFF SASSEERKS<br/>121 WMALLRREIG HFHEKKDLPL DTSDDSSDSDT SFYGAVERPV DISLSPYPTD NEDYEHDDED<br/>181 DSYLEFDSPE PGRLEDALMH PPAYPPPPVP TPRKPAFSDM PRAHSFTSKG PGPLLP PPPP<br/>241 KHGLPDVGLA AEDSKRDPLC PRAAEP CPRV PATPRRM SDP PLSTMTAPG LRPKPCFRES<br/>301 ASPSEPEWPT GHGACSTSSA AIMATATSRN CDLKSFHLS PRGPPTSEPP PVPANKPKFL<br/>361 KIAEEDPPRE AAMPGLFVPP VAPRPPALKL PVPEAMARPA VLPRPEKQPL PHLQRSPPDG<br/>421 QSFRSFSTFKE PRQPSQADTG GDDSEDEYK VPLPNSVFN TTESCEVERL FKATSPRGEP<br/>481 QDGLYCIRNS STKSGKVLVV WDETSNKVRN YRIFEKDSKF YLEGEVLFVS VGSMEVHYHT<br/>541 HVLPSHQSL L RHPYGYTGP R</p> <p>&gt;gi 3023207 sp P78314.2 3BP2_HUMAN RecName: Full=SH3 domain-binding protein 2; Short=3BP-2</p> <p>MAAEEMHWPVPMKAIQAQNL LTMPPGGVAKAGYLHKKGGTQ LQLLKWPLRFV I I H K R C V V Y F K S S T S A S P Q<br/>GAFSLSGYNRVMRAAEETTSNNVFPFKIIH ISKKHRTWFFSASSEERKSWMALLRREIGHFHEKKDLPL<br/>DTSDDSSDSDT SFYGAVERPVDISLSPYPTDNEDYEHDDEDSDYLPDSPEPGRLEDALMHPPAYPPPPVP<br/>TPRKPAFSDMPRAHSFTSKGPGPLLP PPPPKHGLPDVGLAAEDSKRDPLC PRAAEP CPRV PATPRRMSDP<br/>PLSTMTAPGLRKP PCFRESASPSPEWPTPGHGACSTSSA AIMATATSRNCDLKSFHLS PRGPPTSEPP<br/>PVPANKPKFLKIAEEDPPREAAAMPGLFVPPVAPRPPALKL PVPEAMARPA VLPRPEKQPL PHLQRSPPDG<br/>QSFRSFSTFKEPRQPSQADTGDDSDSEDEYK VPLPNSVFN TTESCEVERL FKATSPRGEP QDGLYCIRNS<br/>STKSGKVLVVWDETSNKVRNYRIFEKDSKFYLEGEVLFVSVGSMEVHYHTVLP SHQSL L L RHPYGYTGP<br/>R</p> <p><b>Notes</b><br/>"3BP2 an adaptor protein that binds differentially to the SH3 domains of certain proteins. Links the hemopoietic tyrosine kinase Fes to the cytoplasmic membrane in a phosphorylation dependent manner. Regulates FC-epsilon RI -mediated degranulation in rat basophilic leukemia RBL-2H3 cells. Expressed in a variety of tissues including lung, liver, skeletal muscle, kidney and pancreas. Defects in 3BP2 are the cause of cherubism, an autosomal dominant inherited syndrome characterized by excessive bone degradation of the upper and lower jaws, which often begins around three years of age. It is followed by development of fibrous tissue masses, which causes a characteristic facial swelling. Two differentially spliced isoforms have been described. "Cherubism mice", which carry a gain-of-function mutation in SH3-domain binding protein 2 (Sh3bp2), develop osteoporosis and widespread inflammation dependent on the proinflammatory cytokine, TNF-alpha "<br/>PMA and cAMP-elevating agents (PKC and PKA in vitro) lead to phosphorylation of pSer225 and pSer277 (Mutation of Ser277 causes greater loss of 14-3-3 binding)</p> <p><b>References to 14-3-3 binding to SH3BP2</b><br/>Miah SM, Hatani T, Qu X, Yamamura H, Sada K. Point mutations of 3BP2 identified in human-inherited disease cherubism result in the loss of function. Genes Cells. 2004 Nov;9(11):993-1004.<br/>Foucault I, Liu YC, Bernard A, Deckert M. The chaperone protein 14-3-3 interacts with 3BP2/SH3BP2 and regulates its adapter function. J Biol Chem. 2003 Feb 28;278(9):7146-53</p> |                 |
| <p><b>Human Shc (p66 form)</b></p> <p><b>Notes</b><br/>Endogenous 14-3-3 is tyrosine-phosphorylated can interact with the SH2 domain of Shc following cytokine (GM-CSF) stimulation (Barry et al 2009).<br/>Endothelin-1 induced phosphorylation and 14-3-3-binding is blocked by PD 98059. The sites were not defined.</p> <p><b>References to tyrosine-phosphorylated 14-3-3 binding to p66Shc</b><br/>Foschi M, Franchi F, Han J, La Villa G, Sorokin A. Endothelin-1 induces serine phosphorylation of the adaptor protein p66Shc and its association with 14-3-3 protein in glomerular mesangial cells. J Biol Chem. 2001 Jul 13;276(28):26640-7.<br/>Barry EF, Felquer FA, Powell JA, Biggs L, Stomski FC, Urbani A, Ramshaw H, Hoffmann P, Wilce MC, Grimaldeston MA, Lopez AF, Guthridge MA. 14-3-3:Shc scaffolds integrate phosphoserine and phosphotyrosine signaling to regulate phosphatidylinositol 3-kinase activation and cell survival. J Biol Chem. 2009 May 1;284(18):12080-90.</p>                                                                                                                                                                                                                                                                                                                                                                                                                                                                                                                                                                                                                                                                                                                                                                                                                                                                                                                                                                                                                                                                                                                                                                                                                                                                                                                                                                                                                                                                                                                                                                                                                                                                                                                                                                                                                                                                                                                                                                                                                                                                                                                                                                                                                   | NOT IN WEBLOGO. |
| <p><b>Human Skp2</b> S-phase kinase associated protein-2 (Swissprot = Q13309)</p> <p>1 MHRKHLQEIP DLSSNVATSF TWGWDSSKTS ELLSGMGVSA LEKEEPDSEN IPQELLSNLG<br/>61 HPESP RRKRL KSKGSDKDFV I V R R P K L N R E N F P G V S W D S L P D E L L L G I F S C L C L P E L L K V<br/>121 SGVCKRWYRL ASDES L W Q T L D L T G K N L H P D V T G R L L S Q G V I A F R C P R S F M D Q P L A E H F S P<br/>181 FRVQHMDLSN SVIEVSTLHG ILSQC SKLQN L S L E G L R L S D P I V N T L A K N S N L V R L N L S G C<br/>241 SGFSEFALQT LLSSCSR L D E L N L S W C F D F T E K H V Q V A V A H V S E T I T Q L N L S G Y R K N L Q K S<br/>301 DLSTLVRRCP NLVHLDLSDS VMLKND CFQE FFQLNYLQHL SLSRCYDIIP ETLLELGEIP<br/>361 TLKTLQVFGI VPDGTLQLLK EALPHLQINC SHFTTIARPT I G N K K N Q E I W G I K C R L T L Q K<br/>421 PSCL</p>                                                                                                                                                                                                                                                                                                                                                                                                                                                                                                                                                                                                                                                                                                                                                                                                                                                                                                                                                                                                                                                                                                                                                                                                                                                                                                                                                                                                                                                                                                                                                                                                                                                                                                                                                                                                                                                                                                                                                                                                                                                                                                                                                                                                                                                                                                                                                                                                                |                 |

|                                                                                                                                                                                                                                                                                                                                                                                                                                                                                                                                                                                                                                                                                                                                                                                                                                                                                                                                                                                                                                                                                                                                                                                                                                                                                                                                                                                                                                                                                                                                                                                                                                                                                                                                                                                                                                                                                                                                                                                                                                                                                                                                                                                                                                                                                                                                                                                                                                                                                                                                                                                                                                                                                                                                                                                                                                                                                                                                                                                                                                                                  |  |
|------------------------------------------------------------------------------------------------------------------------------------------------------------------------------------------------------------------------------------------------------------------------------------------------------------------------------------------------------------------------------------------------------------------------------------------------------------------------------------------------------------------------------------------------------------------------------------------------------------------------------------------------------------------------------------------------------------------------------------------------------------------------------------------------------------------------------------------------------------------------------------------------------------------------------------------------------------------------------------------------------------------------------------------------------------------------------------------------------------------------------------------------------------------------------------------------------------------------------------------------------------------------------------------------------------------------------------------------------------------------------------------------------------------------------------------------------------------------------------------------------------------------------------------------------------------------------------------------------------------------------------------------------------------------------------------------------------------------------------------------------------------------------------------------------------------------------------------------------------------------------------------------------------------------------------------------------------------------------------------------------------------------------------------------------------------------------------------------------------------------------------------------------------------------------------------------------------------------------------------------------------------------------------------------------------------------------------------------------------------------------------------------------------------------------------------------------------------------------------------------------------------------------------------------------------------------------------------------------------------------------------------------------------------------------------------------------------------------------------------------------------------------------------------------------------------------------------------------------------------------------------------------------------------------------------------------------------------------------------------------------------------------------------------------------------------|--|
| <p>&gt;gi 37537922 sp Q13309.2 SKP2_HUMAN RecName: Full=S-phase kinase-associated protein 2; AltName: Full=F-box protein Skp2; AltName: Full=Cyclin A/CDK2-associated protein p45; AltName: Full=p45skp2; AltName: Full=F-box/LRR-repeat protein 1</p> <p>MHRKHLQEI PDLSSNVATSFTWGWDS SKTSELLSGMGVSALEKEEPEPSENIPQELLSNLGHPESP RRKRLKSKGSDKDFVIVRRPKLNRENFPGVSWDSL PDELLLGIFSCLCPELLKVSQVCKRWYRLASDES LWQTL DLTGKLNHPDVTGRLLSQGVIAFRCPFRSFMQPLAEHFSPFRVQHMDSLNSVIEVSTLHGILSQCSKLQNLSLEGLRLSDPIVNTLAKNSNLVRLNLSGCSGFSEFALQTLSSCSRLDELNLSWCFDFTEKHVQVAVAHVSETITQLNLSGYRKNLQKSDLSTLVRRCPNLVHLDLSDSVMLKNDCFQEFQNLVYLQHLSLSRCDIIPETLLELGEI PTLKTLQVFGIVPDGTLQLLKEALPHLQINCSHFTT IARPTIGNKKNQEIWGIKCRLLTQKPSCL</p> <p><b>Notes</b><br/>Skp2 is an F-box protein that forms the SCF complex with Skp1 and Cullin-1 to constitute an E3 ligase for ubiquitylation<br/>Lin et al (2009) and Gao et al (2009) found that Ser 72 phosphorylation (SPPRKRLK(pS72)KGSKGS) facilitates Skp2 binding to 14-3-3 proteins. Skp2 cytoplasmic localization required 14-3-3beta2. "It is interesting that although mouse Skp2 lacks Ser 72, most molecular consequences of Akt phosphorylation are also observed in mice, suggesting that the Akt-Skp2 axis is functionally conserved but may use distinct mechanisms."</p> <p><b>References to 14-3-3 binding to Skp2</b><br/>Lin HK, Wang G, Chen Z, Teruya-Feldstein J, Liu Y, Chan CH, Yang WL, Erdjument-Bromage H, Nakayama KI, Nimer S, Tempst P, Pandolfi PP. Phosphorylation-dependent regulation of cytosolic localization and oncogenic function of Skp2 by Akt/PKB. <i>Nat Cell Biol.</i> 2009 Apr;11(4):420-32.<br/>Ecker K, Hengst L. Skp2: caught in the Akt. <i>Nat Cell Biol.</i> 2009 Apr;11(4):377-9.<br/>Gao D, Inuzuka H, Tseng A, Chin RY, Tokar A, Wei W. Phosphorylation by Akt1 promotes cytoplasmic localization of Skp2 and impairs APCdh1-mediated Skp2 destruction. <i>Nat Cell Biol.</i> 2009 Apr;11(4):397-408.</p>                                                                                                                                                                                                                                                                                                                                                                                                                                                                                                                                                                                                                                                                                                                                                                                                                                                                                                                                                                                                                                                                                   |  |
| <p><b>Human SL9A1(NHE1)</b> NHE1 sodium/hydrogen exchanger 1. (Swissprot = P19634)</p> <p>1 MVLRSIGICGL SPHRIFPSSL VVVALVGLLP VLRSHGLQLS PTASTIRSE PPRERSIGDV<br/>61 TTAPPEVTPE SRPVNHSVTD HGMPKPKAFP VLGIDYTHVR TPEFISLWIL LACLMIKGFH<br/>121 VIPTISSIVP ESCLLIVVGL LVGGLIKGVG ETPPFLQSDV FFLFLLPPII LDAGYFLPLR<br/>181 QFTENLGTIL IFAVVGTLWN AFFLGGMLYA VCLVGGEQIN NIGLLDNLFF GSIISAVDPV<br/>241 AVLAVFEEIH INELHLILVF GESLLNDAVT VVLYHLFEEF ANYEHVGIVD IFLGFLSFFV<br/>301 VALGGVVLGV VYGVIAAFTS RFTSHIRVIE PLFVFLYSYM AYLSAELFHL SGIMALIASG<br/>361 VVMRPYVEAN ISHKSHTTIK YFLKMWSSVS ETLIFIFLGV STVAGSHHWN WTFVISTLLF<br/>421 CLIARVLGVL GLTWFINKFR IVKLTTPKQF IAYGGLRGA IAFSLGYLLD KKHFPMDLFL<br/>481 LTAITIVVIF TVFVQGMTIR PLVDLLAVKK KQETKRSINE EIHTQFLDHL LTGIEDICGH<br/>541 YGHHHWKDKL NRFNKYVVKK CLIAGERSKE PQLIAFYHKM EMQAIELVE SGGMGKIPSA<br/>601 VSTVSMQNIH PKSLPSERIL PALSCKDEE IRKILRNNLQ KTRQRLRSYN RHTLVADPYE<br/>661 EAWNQMLLR QKARQLEQKI NNYLTVPAHK LDSPTMSRAR IGS<sup>703</sup>PLAYEP KEDLPVITID<br/>721 PASPQSPESV DLVNEELK GK VLGLSRDPAK VAEDEDDDG GIMMRSKETS SPGTDVDFTP<br/>781 APSDSFSSQR IQRCLSDPGP HPEPGEPEFP FPKGQ</p> <p>&gt;gi 127809 sp P19634.2 SL9A1_HUMAN RecName: Full=Sodium/hydrogen exchanger 1; AltName: Full=Na(+)/H(+) exchanger 1; Short=NHE-1; AltName: Full=Solute carrier family 9 member 1; AltName: Full=Na(+)/H(+) antiporter, amiloride-sensitive; AltName: Full=APNH</p> <p>MVLRSIGICGLSPHRIFPSSLVVVALVGLLPVLRSHGLQLSPTASTIRSEPPRERSIGDVTTAPPEVTPE SRPVNHSVTDHGMPKPKAFPVLGIDYTHVRTPEFISLWILLACLMIKGFHVIPTISSIVPESCLLIVVGL LVGGLIKGVGETPPFLQSDVFFLLFLLPPIILDAGYFLPLRQFTENLGTILIFAVVGTLWNAFFLGGMLYA VCLVGGEQINNIGLLDNLFFGSIISAVDPVAVLAVFEEIHNELHLILVFGESLLNDAVTVVLYHLFEEF ANYEHVGIVDIFLGFLSFFVVALGGVVLGVVYGVIAAFTSRFTSHIRVIEPLFVFLYSYMAYLSAELFHL SGIMALIASGVVMRPYVEANISHKSHTTIK YFLKMWSSVSETLIFIFLGVSTVAGSHHWNWTFVISTLLF CLIARVLGVLGLTWFINKFRIVKLTTPKQFI IAYGGLRGAIAFSLGYLLDKKHFPMDLFLTAITIVVIF TVFVQGMTIRPLVDLLAVKKKQETKRSINEEIHTQFLDHLHTGIEDICGHYGHHWKDKLNRFNKYYVKK CLIAGERSKEPQLIAFYHKMEMQAIELVESGGMGKIPSAVSTVSMQNIH PKSLPSERILPALSCKDEE IRKILRNNLQKTRQRLRSYNRHTLVADPYEEAWNQMLLRQKARQLEQKINNYLTVPAHKLDSPTMSRAR IGS<sup>703</sup>PLAYEPKEDLPVITIDPASPQSPESVDLVNEELK GK VLGLSRDPAKVAEDEDDDG GIMMRSKETS SPGTDVDFTPAPSDFSSQRIQRCLSDPGPHPEPGEPEFPFFPKGQ</p> <p><b>Notes</b><br/>RSK phosphorylated S703 on the C-terminus of NHE1 and the adapter protein 14-3-3 bound to phospho-S703, which increased NHE1 activity.</p> <p><b>References to 14-3-3 binding to NHE1</b><br/>Lehoux S, Abe Ji, Florian JA, Berk BC. 14-3-3 Binding to Na<sup>+</sup>/H<sup>+</sup> exchanger isoform-1 is associated with serum-dependent activation of Na<sup>+</sup>/H<sup>+</sup> exchange. <i>J Biol Chem.</i> 2001 May 11;276(19):15794-800.<br/>Maekawa N, Abe J, Shishido T, Itoh S, Ding B, Sharma VK, Sheu SS, Blaxall BC, Berk BC. Inhibiting p90 ribosomal S6 kinase prevents (Na<sup>+</sup>)-H<sup>+</sup> exchanger-mediated cardiac ischemia-reperfusion injury. <i>Circulation.</i> 2006 May 30;113(21):2516-23</p> |  |
| <p><b>Human SLITRK1</b> HUMAN SLIT- and TRK-like family, member 1 (Swiss-Prot=Q96PX8)</p> <p>1 MLLWILLLET SLCFAAGNVT GDVCKEKICS CNEIEGDLHV DCEKKGFTSL QRFTAPTSQF<br/>61 YHLFLHGNSL TRLPFNEFAN FYNAVSLHME NNGLHEIVPG AFLGLQLVLR LHINNNKIKS<br/>121 FRKQTFGLGL DLEYLQADFN LLRDIDPGAF QDLNKLEVL LNDNLISTLP ANVFQYVPIT<br/>181 HLDLRGNRLK TLPYEEVLEQ IPGIAEILLE DNPWDCTCDL LSLKEWLENI PKNALIGRVV<br/>241 CEAPTRLQ GK DLNETTEQDL CPLKNRVDS LPAPPAQEET FAPGPLPTPF KTNQEDHAT<br/>301 PGSAFNGGTK IPGNWQIKIR PTAAIATGSS RNKPLANSLP CGPGCSCDHI PGSGLKMNCN<br/>361 NRVNSSLADL KPKLSNVQEL FLRDNKIHSI RKSHFVDYKN LILLDLGNNN IATVENNTFK<br/>421 NLLDLRWLYM DSNYLDLTSR EKFAQLQNL EYLNVEYNAIQ LILPGTFNAM PKLRILILNN<br/>481 NLLRSLPVDV FAGVSLSKLS LHNNYFMYLP VAGVLDQLTS IIQIDLHGNT WECSCTIVPF<br/>541 KQWAEERLGS VLMSDLKCEP PVNFRRKDFM LLNDEICFP LYARISPTLT SHSKNSTGLA<br/>601 ETGTHSNSYL DTSRVSISVL VPGLLLVFVT SAFTVVGMLV FILRNRKRK RRDANSSASE</p>                                                                                                                                                                                                                                                                                                                                                                                                                                                                                                                                                                                                                                                                                                                                                                                                                                                                                                                                                                                                                                                                                                                                                                                                                                                                                                                                                                                                                                                                                                                                                                                                                                                                                                                                                                                                                                                                                                                                                                                                                                                                                                                              |  |

|                                                                                                                                                                                                                                                                                                                                                                                                                                                                                                                                                                                                                                                                                                                                                                                                                                                                                                                                                                                                                                                                                                                                                                                                                                                                                                                                                                                                                                                                                                                                                                                                                                                                                                                                                                                                                                                                                                                                                                                                                                                                                                                                                                                                                                                                                                                                                                                                                        |  |
|------------------------------------------------------------------------------------------------------------------------------------------------------------------------------------------------------------------------------------------------------------------------------------------------------------------------------------------------------------------------------------------------------------------------------------------------------------------------------------------------------------------------------------------------------------------------------------------------------------------------------------------------------------------------------------------------------------------------------------------------------------------------------------------------------------------------------------------------------------------------------------------------------------------------------------------------------------------------------------------------------------------------------------------------------------------------------------------------------------------------------------------------------------------------------------------------------------------------------------------------------------------------------------------------------------------------------------------------------------------------------------------------------------------------------------------------------------------------------------------------------------------------------------------------------------------------------------------------------------------------------------------------------------------------------------------------------------------------------------------------------------------------------------------------------------------------------------------------------------------------------------------------------------------------------------------------------------------------------------------------------------------------------------------------------------------------------------------------------------------------------------------------------------------------------------------------------------------------------------------------------------------------------------------------------------------------------------------------------------------------------------------------------------------------|--|
| <p>661 INSLQTVCDSSYWHNGPYNA DGAHRVYDCG SHSLSD<br/>&gt;gi 46396997 sp Q96PX8.2 SLIK1 HUMAN RecName: Full=SLIT and NTRK-like protein 1; AltName: Full=Leucine-rich repeat-containing protein 12; Flags: Precursor MLLWILLLETSLCFAAGNVTDGVCKEKICSCNEIEGDLHVDCEKKGFTSLQRFTAPTQSQFYHFLFHGNSL TRLPNEFANFYNAVSLHMENGLHEIVPGAFLGLQVVKRLHINNNKIKSFRKQTFGLGLDDEYLAQDFN LLRDLDPGAFQDLNKLLEVLINDNLISTLPANVFQVYVPIHDLRGNRLKTPYEVEVLEQIPGIAEILLE DNPWDCTCDLLSLKWELENIKPNALIGRVVCEAPTRLQGGKDLNETEQDLCPKLRVDSLPPAPAEET FAPGPLPTPFKTNQGEDHATPGSAPNGGKTIKIRPTAAATGSSRNKPLANSPLCPGGCSDHI PGSGLMKMNRRNVSSSLADLKPKLSNVQELFLRDNKIHSIRKSHFVDYKNLILLDLGNNNIATVENNTFK NLLDLRWLYMDSNYLDTLSREKFAQLQNLLEYLNVEYNAIQILIPGTFNAMPKLRILILNNLLRSLPVDV FAGVSLSKLSLHNNYFMYLPVAGVLDQLTSIIQIDLHGNPWCSCSTIVPFKQWAERLGSEVLMSDLK CET PVNFRKDFMLLSNDEICPQLYARISPTLTSKSNSTGLAETGTHSNSYLDTSRVSI SVLVPGLLLVFVT SAFTVVGMLVFILRNKRKRSDANSASEINSLQTVCDSSYWHNGPYNADGAHRVYDCGSHSLSD</p> <p><b>Notes</b><br/>A type-I transmembrane protein with an extracellular leucine-rich repeat (LRR) domain homologous to SLIT. Recent studies identified alterations at the SLITRK1 locus in subjects with Tourette syndrome (TS), attention-deficit/hyperactivity disorder (ADHD), and obsessive-compulsive disorder (OCD) symptoms. Phosphorylation site at serine 695 (Ser695) of SLITRK1, which is phosphorylated by casein kinase II (CK2) and regulates the interaction between SLITRK1 and 14-3-3 proteins. Because Ser695 is both a CK2 substrate and corresponds to a mode 3 motif. Deletion of the six terminal amino acid residues resulted in the complete abolishment of the interaction between purified recombinant 14-3-3 <math>\beta</math> and SLITRK1. A motif in the carboxyl terminus of the intracellular domain of SLITRK1 (SHSLpSD-COOH) meets criteria for the mode 3 motif. This tail is different in the other gene products (SLITRKs 2 to 6). The tail is conserved in the mouse sequence (Q810C1. Mouse.....DGSHRVYDCG SHSLSD).<br/>Carol note: Direct phosphorylation-dependent interaction of GST-SICD) (form of SLITRK1 with longer cytoplasmic domain) with 14-3-3 demonstrated in vitro.</p> <p><b>References to 14-3-3 binding to SLITRK1</b><br/>Kajiwara Y, Buxbaum JD, Grice DE. SLITRK1 Binds 14-3-3 and Regulates Neurite Outgrowth in a Phosphorylation-Dependent Manner. <i>Biol Psychiatry</i>. 2009 Jul 27. [Epub ahead of print]</p> |  |
| <p><b>Human Snn</b> (Stannin) (Swissprot = O75324)<br/>1 MSIMDHSPPTGVVTVIVILIAAALGALILGCWCYLRLQRISQSEDEESI VGDGETKEPFL<br/>61 LLVQYSAKGP CVERKAKLMT PNGPEVHG<br/>&gt;gi 6094313 sp O75324.1 SNN_HUMAN RecName: Full=Stannin; AltName: Full=AG8_1 MSIMDHSPPTGVVTVIVILIAAALGALILGCWCYLRLQRISQSEDEESI VGDGETKEPFLVQYSAKGP CVERKAKLMTPNGPEVHG</p> <p><b>Notes</b><br/>In all species examined, the putative 14-3-3-binding motif (amino acid residues 39–45 within Snn) is conserved. Stannin and 14-3-3 co-immunoprecipitation was demonstrated, but no experiments reported to determine whether Ser45 is phosphorylated or responsible for binding to 14-3-3. RISQpS<sup>45</sup>ED (= Ser44 in O75324)</p> <p><b>References to 14-3-3 binding to stannin</b><br/>Davidson CE, Reese BE, Billingsley ML, Yun JK. The protein stannin binds 14-3-3zeta and modulates mitogen-activated protein kinase signaling. <i>Brain Res Mol Brain Res</i>. 2005 Aug 18;138(2):256-63.</p>                                                                                                                                                                                                                                                                                                                                                                                                                                                                                                                                                                                                                                                                                                                                                                                                                                                                                                                                                                                                                                                                                                                                                                                                                                                                                                                                                                                                                                          |  |
| <p><b>Human SRPK2</b> Serine/arginine-rich protein-specific kinase 2 (Swiss-Prot = P78362)<br/>1 MSVNSEKSSSERPEPQQKA PLVPPPPPPP PTPPEPEEEILGSDDEEQEDPADYCKGGYHP<br/>61 ADYCKGGYHP VKIGDLFNGR YHVIRKLGWG HFSTVWLCWD MQGKRFVAMK VVKSQAQHYTE<br/>121 TALDEIKLLK CVRESDPSPD NKDMVQLID DFKISGMNGI HVCVMFVVLG HLLKWI IKS<br/>181 NYQGLPVRCV KSIIRQVLQG LDYLHLSKCKI IHTDIKPENI LMCVDDAYVR RMAAEATEWQ<br/>241 KAGAPPPSGS AVSTAPQQKP IGKISKNNKK KLKKKQKRQA ELLEKRLQEI EELEREAEK<br/>301 IIEENITSAAPSNDDQGEYC PEVKLKTGGL EEAEEAEATK DNGEADQEE KEDAEKENIE<br/>361 KDEDVDQEL ANIDPTWIES PKTNGHIENG PFSLEQQLLD EDDDEEDCPN PEEYNLDEPN<br/>421 AESDYYSSS YEQFNGELPN GRHKIPESQF PEFSTSLFSG SLEPVACGSV LSEGSPLTEQ<br/>481 EESSPSHDRS RTVSASSTGD LPKAKTRAAD LLVNPLDPR RDKIRVKIAD LGNACVWHKH<br/>541 FTEDIQTRQY RSIEVLIGAG YSTPADIWST ACMAFELATG DYLFEPHSGE DYSRDEDHIA<br/>601 HIEELGSI PRHFALSGKYS REFFNRRGEL RHITKLPWS LFDVLVEKYG WPHEDAAQFT<br/>661 DFLIPMLEM PEKRASAGCL CRHPWLNS<br/>&gt;gi 68566065 sp P78362.2 SRPK2 HUMAN RecName: Full=Serine/threonine-protein kinase SRPK2; AltName: Full=Serine/arginine-rich protein-specific kinase 2; Short=SR-protein-specific kinase 2; AltName: Full=SFRS protein kinase 2 MSVNSEKSSSERPEPQQKAPLVPPPPPPP PTPPEPEEEILGSDDEEQEDPADYCKGGYHP VKIGDLFNGRYHVIRKLGWGFSTVWLCWDMQGKRFVAMKVVKSQAQHYTETALDEIKLLKCVRESDPSPD NKDMVQLIDDFKISGMNGIHVCVMFVVLGHLLKWI IKS NYQGLPVRCVKS IIRQVLQGLDYLSKCKI IHTDIKPENILMCVDDAYVRRMAAEATEWQKAGAPPPSGSAVSTAPQQKPIGKISKNNKKLKKKQKRQA ELLEKRLQEI EELEREAEK IIEENITSAAPSNDDQGEYCPEVKLKTGGL EEAEEAEATK DNGEADQEE KEDAEKENIEKDEDVDQELANIDPTWIESPKTNGHIENG PFSLEQQLLDDEEDCPN PEEYNLDEPN AESDYYSSS YEQFNGELPN GRHKIPESQF PEFSTSLFSGSLEPVACGSV LSEGSPLTEQ EESSPSHDRS RTVSASSTGDL PKAKTRAAD LLVNPLDPR RDKIRVKIAD LGNACVWHKH FTEDIQTRQYRSIEVLIGAG YSTPADIWSTACMAFELATGDYLFEPHSGE DYSRDEDHIA HIEELGSI PRHFALSGKYS REFFNRRGEL RHITKLPWS LFDVLVEKYG WPHEDAAQFT DFLIPMLEM PEKRASAGCL CRHPWLNS</p> <p><b>Notes</b><br/>Akt reported to phosphorylate SRPK2 on T492. (This motif (HDSRtVSAS) is not a conventional RxRxx(pS/T) phosphorylation site for PKB/Akt.)</p> <p><b>References to 14-3-3 binding to SPRK2</b><br/>Jang SW, Liu X, Fu H, Rees H, Yepes M, Levey A, Ye K. Interaction of Akt-phosphorylated SRPK2 with 14-3-3 mediates cell cycle and cell death in neurons. <i>J Biol Chem</i>. 2009 Jul 10. [Epub ahead of print]</p>                                   |  |
| <p><b>Human SSH1L</b> The phosphatase Slingshot 1-like, which dephosphorylates cofilin. (isoform 1, Swissprot = Q8WYL5)</p>                                                                                                                                                                                                                                                                                                                                                                                                                                                                                                                                                                                                                                                                                                                                                                                                                                                                                                                                                                                                                                                                                                                                                                                                                                                                                                                                                                                                                                                                                                                                                                                                                                                                                                                                                                                                                                                                                                                                                                                                                                                                                                                                                                                                                                                                                            |  |

|                                                                                                                                                                                                                                                                                                                                                                                                                                                                                                                                                                                                                                                                                                                                                                                                                                                                                                                                                                                                                                                                                                                                                                                                                                                                                                                                                                                                                                                                                                                                                                                                                                                                                                                                                                                                                                                                                                                                                                                                                                                                                                                                                                                                                                                                                                                                                                                                                                                                                                                       |                                                                                                                                                                                                                                                                                                                                                                                                                                                                                                                                                                                                                                                                                                                                                                                                                                                                                                                                                                                                                                                                                                                                                                                                                                                                                                                                                                                                                                                                                                                                                          |
|-----------------------------------------------------------------------------------------------------------------------------------------------------------------------------------------------------------------------------------------------------------------------------------------------------------------------------------------------------------------------------------------------------------------------------------------------------------------------------------------------------------------------------------------------------------------------------------------------------------------------------------------------------------------------------------------------------------------------------------------------------------------------------------------------------------------------------------------------------------------------------------------------------------------------------------------------------------------------------------------------------------------------------------------------------------------------------------------------------------------------------------------------------------------------------------------------------------------------------------------------------------------------------------------------------------------------------------------------------------------------------------------------------------------------------------------------------------------------------------------------------------------------------------------------------------------------------------------------------------------------------------------------------------------------------------------------------------------------------------------------------------------------------------------------------------------------------------------------------------------------------------------------------------------------------------------------------------------------------------------------------------------------------------------------------------------------------------------------------------------------------------------------------------------------------------------------------------------------------------------------------------------------------------------------------------------------------------------------------------------------------------------------------------------------------------------------------------------------------------------------------------------------|----------------------------------------------------------------------------------------------------------------------------------------------------------------------------------------------------------------------------------------------------------------------------------------------------------------------------------------------------------------------------------------------------------------------------------------------------------------------------------------------------------------------------------------------------------------------------------------------------------------------------------------------------------------------------------------------------------------------------------------------------------------------------------------------------------------------------------------------------------------------------------------------------------------------------------------------------------------------------------------------------------------------------------------------------------------------------------------------------------------------------------------------------------------------------------------------------------------------------------------------------------------------------------------------------------------------------------------------------------------------------------------------------------------------------------------------------------------------------------------------------------------------------------------------------------|
| <pre> 1 MALVTLQRSP TPSAASSAS NSELEAGSEE DRKLNLSLSE SFFMVKGAAL FLQOGSSPQG 61 QRSLQHPHKH AGDLPQHLQV MINLLRCEDR IKLAVRLESA WADRVRVMV VYSSGRQDTE 121 ENILGVDVFS SKESKSTIG MVLRLWSDTK IHLDDGGGFS VSTAGRMIHIF KPVSVQAMMS 181 ALQVLHKACE VARRHNYFFPG GVALIWATYY ESCISSEQSC INEWNAMQDL ESTRPDSPAL 241 FVDKPTGEGER TERLIKAKLR SIMMSQDLEN VTSKEIRNEL EKQMNCLKE LKEFIDNEML 301 LILGQMDKPS LIFDHLYLGS EWNASNLEEL QGSGVDYILN VTREIDNFFP GLFAYHNIRV 361 YDEETDLLA HWNEAYHFIN KAKRNHSHKCL VHCKMGVSR ASTVIAYAMK EFGWPLEKAY 421 NYVKQKRST RPNAGFMRQL SEYEGILDAS KQRHNKLWRQ QDSSLQQPV DDPAGPGDFL 481 PETPDGTPES QLPFLDDAAQ PGLGPPLPC FRRLSDPLP SPEDETGSLV HLEDPEREAL 541 LEEAAPPAEV HRPARQPQGG SGLCEKDVKK KLEFGSPKGR SGSLQVEET EREGLGAGR 601 WQQLPTQLDQ NLLNSENLN NSKRSCPNGM EDDAIFGILN KVKPSYKSCA DCMYPTASGA 661 PEASRERCED PNAPACTQP AFLPHITSSP VAHLASRSV PEKPASGPE PPPFLPPAGS 721 RRADTSGPGA GAALPEPASL LEPSRETQKV LPKSLLKNS HCDKNPPSTE VVIKEESSPK 781 KDMKPAKDLR LLFNSNESEK TNSYLMQHQ ESI IQLQKAG LVRKHTKELE RLKSVADPA 841 PPSRDGPASR LEASIPESQ DPAALHELGP LVMPSQAGS EKSEAPASL EGGSLKSPFP 901 FFYRLDHTSS FSKDFLKTIC YTPTSSMS NLTRSSSDS IHSVRGKPGV VKQRTQEIET 961 RLRLAGLTVS SPLKRSHSLA KLGSLTFSTE DLSSEADPST VADSQDTTSL ESSFLHEPQG 1021 TPRDPAATSK PSGKPAPENL KSPSWMSSK &gt;gi 82582267 sp Q8WYL5.2 SSH1_HUMAN RecName: Full=Protein phosphatase Slingshot homolog 1; AltName: Full=SSH-1L; AltName: Full=hSSH-1L MALVTLQRSPTPSAASSASNSELEAGSEEDRKLNLSLSE SFFMVKGAALFLQOGSSPQQRSLQHPHKH AGDLPQHLQVMINLLRCEDRIKLAVRLES AWADRVRVMV VYSSGRQDTEENILLGVDVFS SKESKSTIG MVLRLWSDTKIHLDDGGGFSVSTAGRMIHIFKPVSVQAMMSALQVLHKACEVARRHNYFFPGVALIWATYY ESCISSEQSCINEWNAMQDLESTRPDSPALFVDKPTGEGERTERLIKAKLRSIMMSQDLENVTSKEIRNEL EKQMNCLKELKEFIDNEMLLILGQMDKPSLIFDHLYLGS EWNASNLEELQSGVDYILNVTREIDNFFP GLFAYHNIRVYDEETDLLAHWNEAYHFIN KAKRNHSHKCLVHCKMGVSRASSTVIAYAMKEFGWPLEKAY NYVKQKRST RPNAGFMRQLSEYEGILDASKQRHNKLWRQQT DSSLQQPVDPPAGPGDFLPETPDGTPES QLPFLDDAAQ PGLGPPLPCFRRLSDPLP SPEDETGSLV HLEDPEREAL LEEAAPPAEV HRPARQPQGG SGLCEKDVKKLEFGSPKGRSGSLQVEET EREGLGAGRWGQLPTQLDQ NLLNSENLN NSKRSCPNGM EDDAIFGILNKVKPSYKSCADCMYPTASGAPEASRERCEDPNAPACTQPAFLPHITSSPVAHLASRSV PEKPASGPEPPPFLPPAGSRADTSGPGAGAALPEPASLLEPSRETQKVLKPKSLLKNSHCDKNPPSTE VVIKEESSPKKDMKPAKDLRLLLFNSNESEKPTNSYLMQHQES I IQLQKAGLVRKHTKELE RLKSVADPA PPSRDGPASRLEASIPESQDPAALHELGPLVMPSQAGSDEKSEAPASLEGGSLKSPFPFFYRLDHTSS FSKDFLKTIC YTPTSSMSNLTRSSSDS IHSVRGKPGVVKQRTQEIETRLRLAGLTVSSPLKRSHSLA KLGSLTFSTEDLSSEADPSTVADSQDTTLESSFLHEPQGTTPRDPAATSKPSGKPAPENL KSPSWMSSK </pre> | <p><b>Notes</b></p> <p>14-3-3 proteins associate with SSH1L when phosphorylated at serines 937 and 978, thereby sequestering SSH1L in the cytoplasm and preventing translocation of the phosphatase to F-actin-rich membrane protrusions (Nagata-Ohashi et al 2004). PKD1 and PKD2 directly phosphorylate SSH1L at these residues, thereby controlling SSH1L localization and thus cofilin dephosphorylation and activation at membrane protrusions and migration of breast cancer cells (Peterburs et al 2009).</p> <p>14-3-3 also binds to the C-terminal region of the related slingshot protein (Eiseler et al 2009)</p> <p><b>References to 14-3-3 binding to SSH1L</b></p> <p>Nagata-Ohashi K, Ohta Y, Goto K, et al. A pathway of neuregulin-induced activation of cofilin-phosphatase Slingshot and cofilin in lamellipodia. <i>J Cell Biol</i> 2004;165:465-71</p> <p>Peterburs P, Heering J, Link G, Pfizenmaier K, Olayioye MA, Hausser A. Protein kinase D regulates cell migration by direct phosphorylation of the cofilin phosphatase slingshot 1 like. <i>Cancer Res.</i> 2009 Jul 15;69(14):5634-8.</p> <p>Kligys, K., Yao, J., Yu, D. and Jones, J.C. 14-3-3zeta/tau heterodimers regulate Slingshot activity in migrating keratinocytes. <i>Biochem. Biophys. Res. Commun.</i> (2009) 383 (4), 450-454.</p> <p>Eiseler T, Döppler H, Yan IK, Kitatani K, Mizuno K, Storz P. Protein kinase D1 regulates cofilin-mediated F-actin reorganization and cell motility through slingshot. <i>Nat Cell Biol.</i> 2009 May;11(5):545-56.</p> |
| <pre> 1 MEPITFTARK HLLSNEVSD FGLQLVGSPL VHSLTTPMPL PWVVAEVRRL SRQSTRKEPV 61 TKQVRLCVSP SGLRCEPEPG RSQQWDPLIY SSIFECKPQR VHKLIHNSHD PSYFACLIKE 121 DAVHRQSI CY VFKADDQTKV PEI ISSIRQA GKARQEELH CPSEFDDTFS KKFVFLFCGR 181 TVVAHKKAPP ALIDECIEKF NHVSGSRGSE SPRPNPPHAA PTGSQEPVRR PMRKSFSQPG 241 LRSLAFRKEL QDGGLRSSGF FSSFEEEDIE NHLISGHNIV QPTDIEENRT MLFTIGQSEV 301 YLISPDTKKI ALEKNFKEIS FCSQGIRHVD HFGFICRESS GGGGFHFVCI VFQCTNEALV 361 DEIMMTLQQA FTVAAVQQT A KAPAQLCEGC PLOSLHKLCE RIEGMNSSKT KLELQKHLTT 421 LTNQEQATIF EEVQKLRPRN EQRENELIIS FLRCLYEEKQ KEHIHIGEMK QTSQMAENI 481 GSELPPSATR FRDMLKNKA KRSLETESLES ILSRGNKARG LQEHISISVDL DSSLSTLSN 541 TSKEPSVCEK EALPISESSF KLLGSSEDL SDESHPLEE PAPLSPQAG RRRANLSHF 601 PIECQEPQP ARGSPGVSQR KLMRYHSVST ETPHERKDFE SKANHLGDSG GTPVKTRRS 661 WRQQIFLRVA TPQKACDSS RYEDYSELGE LPPRSPLFPV CEDGPFPPFP EEKRTSREL 721 RELWQKAILQ QILLRMEKE NQKLQASEND LLNKRLKLDY EETTPCLKEV TTVWEKMLST 781 PGRSKIKFDM EKMHSVAVGQG VPRHHRGEIW KFLAEQFHLK HQFPKQKQPK DVPYKELLKQ 841 LTSQQHAIL DLGRTFPHTP YFSAQLGAGQ LSLYNILKAY SLLDQEVGYC QGLSFVAGIL 901 LHMSEEEAF KMLKFLMFD M GLRKQYRDM IILQIQMYQL SRLLDHYHRD LYNHLEHEEI 961 GPSLYAAPWF LTMFASQFPL GFVARVFDMI FLQGTVEVIFK VALSLLGSHK PLILQHENLE 1021 TIVDFIKSTL PNLGLVQMEK TINQVFEMDI AKQLQAYEVE YHVLQEEELID SSPLSDNQRM 1081 DKLEKTNSL RKQNLDLLEQ LQVANGRIQS LEATIEKLLS SESKLLQAML TLELERSALL 1141 QTVEELRRRS AEPSDREPEC TQPEPTGD &gt;gi 116242816 sp Q86TI0.2 TBCD1_HUMAN RecName: Full=TBC1 domain family member 1 MEPITFTARKHLLSNEVSDFGLQLVGSPLVHSLTTPMPLPWVVAEVRRLSRQSTRKEPVTKQVRLCVSP SGLRCEPEPGRSQQWDPLIYSSIFECKPQRVHKLIHNSHDPSYFACLIKEDAVHRQSI CYVFKADDQTKV PEI ISSIRQAGKIARQEELHCPSEFDDTFSKKFVFLFCGRVTVVAHKKAPPALIDECIEKFNHVSGSRGSE </pre>                                                                                                                                                                                                                                                                                                                                                                                                                                                                                                                                                                                                                                                                                                                                                                                    | <p><b>Human TBC1D1</b> (SwissProt=Q86TI0)</p>                                                                                                                                                                                                                                                                                                                                                                                                                                                                                                                                                                                                                                                                                                                                                                                                                                                                                                                                                                                                                                                                                                                                                                                                                                                                                                                                                                                                                                                                                                            |

SPRPNPPHAAPTGSQEPVRRPFRKSFSSQPLRSLAFRKELODGGRLSSGGFFSSFEESDIENHLISGHNIV  
 QPTDIEENRMLFTIGQSEVYLISPDTKKIALEKNFKEISFCSQGIHVDFHFGFICRESSGGGGFHFVCI  
 VFQCTNEALVEIMTLKQAFVAAVQQTAKAPQAQLCEGCPQLQSLHKLKERIEGMNSSKTKLELQKHLTT  
 LTNQEQATIFEEVQKLRPRNEQRENELIISFLRCLYEEKQKEHIHIGEMKQTSQMAAENIGSELPPSATR  
 FRLDMLKNKAKRSLTESLESILSRGNKARGLQEHISVDLDSLSSTLSNNTSKEPSVCEKEALPISESSF  
 KLLGSSSEDLSSDESHELPPEEPALPSQQAFFRRRANTLSHFPIECQEPQPARGSPGVSQRKLMRYHSVST  
 ETPHERKDFESKANHLGDSGGTPVKTRRHSWRQQIFLRVATPQKACDSSSRVYEDYSELGELPPRSLEPV  
 CEDGPFPGPPPEEKKRTSRELRELWQKAILQQILLRMEKENQKQLQASENDLLNKRLKLDYEEITPCLKEV  
 TTVWEKMLSTPGRSRIKFDMEKMSAVGQGVPRHHRGEIWKFLAEQFHLKHQFPSKQPKDVPYKELLKQ  
 LTSQQHAILIDLGRFTPTHYFSAQLGAGQLSLYNIKAYSLLDQEVGYCQGLSFVAGILLHMHSEEEAF  
 KMLKFLMFDMLGRKQYRPMIILQIQMYQLSRLLHDYHRDLNHLNHEEHEIGPSLYAAPWFLTMFASQFPL  
 GFVARVFDIMFLQGEVIKVALSLLGSHKPLILQHENLETVDFIKSTLPLNLGLVQMEKTINQVFEMDI  
 AKQLQAYEVEYHVLQEBELIDSSPLSDNQRMDKLEKTNSSLRKQNLDDLEQLQVANGRIQSLEATIEKLLS  
 SESKLLQAMLTLELERSALLQTVEELRRRSAPSDREPECTQPEPTGD

**Notes**

TBC1D1 (related to AS160/TBC1D4) a putative GTPase activating protein for Rab family protein(s). May play a role in cell cycle and differentiation of various tissues.

When AMPK (AMP-activated protein kinase) is activated in HEK (human embryonic kidney)-293 cells, 14-3-3s bind primarily to pSer237 (where pSer is phosphorylated serine) in TBC1D1, whereas 14-3-3 binding depends primarily on pThr596 (where pThr is phosphorylated threonine) in cells stimulated with IGF-1 (insulin-like growth factor 1), EGF (epidermal growth factor) and PMA; and both pSer237 and pThr596 contribute to 14-3-3 binding in cells stimulated with forskolin. In HEK-293 cells, LY294002 inhibits phosphorylation of Thr596 of TBC1D1, and promotes phosphorylation of AMPK and Ser237 of TBC1D1.

TBC1D1 is strongly phosphorylated on Ser237 and binds to 14-3-3s in response to the AMPK activators AICAR (5-aminoimidazole-4-carboxamide-1-β-D-ribofuranoside), phenformin and A-769662, whereas insulin promotes phosphorylation of Thr596 but not 14-3-3 binding. In contrast, AS160 is phosphorylated on its 14-3-3-binding sites (Ser341 and Thr642) and binds to 14-3-3s in response to insulin, but not A-769662, in L6 cells.

**References to 14-3-3 binding to TBC1D1**

Chen S, Murphy J, Toth R, Campbell DG, Morrice NA, Mackintosh C. Complementary regulation of TBC1D1 and AS160 by growth factors, insulin and AMPK activators. *Biochem J.* 2008 Jan 15;409(2):449-59

Pehmøller C, Treebak JT, Birk JB, Chen S, Mackintosh C, Hardie DG, Richter EA, Wojtaszewski JF. Genetic disruption of AMPK signaling abolishes both contraction- and insulin-stimulated TBC1D1 phosphorylation and 14-3-3 binding in mouse skeletal muscle. *Am J. Physiol. Endocrinol Metab* 2009 Jun 16.

**Human TBC1D4 (AS160)** RabGAP TBC1D4 = AS160 (Swissprot = O60343 (longer variant))

1 MEPPSCIQDE PFPHPLEPEP GVSAPQPGPK PSDKRFRLWY VGGSCLDHRT TLPMLPWLMA  
 61 EIRRRSQKPE AGGCGAPAAR EVILVLSAFP LRCVPAPGAG ASGGTSPSAT QPNPAVFIFE  
 121 HKAQHISRFI HNSHDLTYFA YLIKAQPPDD ESQMACHVFR ATDPSQVPDV ISSIRQLSKA  
 181 AMKEDAKPSK DNEDAFYNSQ KFEVLYCGKV TVTHKKAPSS LIDDCMEKFS LHEQQRLKIQ  
 241 GEQRGPDPE DLADLEVVPV GSPGDCLPEE ADGTDTHLGL PAGASQPALT SSRVCFPERI  
 301 LEDSGFDEQQ EFRSRCSSTV GVQRRVHEGS QKSQPRRRA HAPSHVQPSD SEKNRSTMLFQ  
 361 VGRFEINLIS PDKTSVVLEK NFKDISSCSQ GIKHVDHFGF ICRESPEPGL SQYICYVFCQ  
 421 ASESIVDEVM LTLKQAFSTA AALQSAKTQI KLCEACPMHS LHKLCERIEG LYPPRAKLVI  
 481 QRHLSSLTDN EQADIFERVQ KMKPVSDQEE NELVILHLRQ LCEAKQKTHV HIGEGPSTIS  
 541 NSTIPENATS SGRFKLDILK NKAARSLTSS LENIFSRGAN RMRGRGLGSD SFERSNSLAS  
 601 EKDYSPGDSP PGTTPASPPS SAWQTFPEED SDSQFRRRA HFSHPPSST KRKLNLDQGR  
 661 AQGVRSPLLR QSSSEQCSNL SSVRRMYKES NSSSLSPLSH TSFSAPSFTA PSFLKSFYQN  
 721 SGRLSPOYEN EIRQDTASES SDGEGKRRTS STCSNESLSV GGTSVTPPRI SWRQRIFLRV  
 781 ASPMNSKPSA MQQQDGLDRN ELLPLSPLSP TMEEEPLVVF LSGEDDPEKI EERKKSKELR  
 841 SLWRKAIHQQ ILLRMEKEN QKLEASRDEL QSRKVKLDYE EVGACQKEVL ITWDKLLNLC  
 901 RAKIRCDMED IHTLLKEGVP KSRRGEIWQF LALQYRLRHR LPNKQPPDI SYKELKQLT  
 961 AQQHAILVDL GRTFPTHYF SVQLGPGQLS LFNLLKAYS LDKVEGYCQG ISFVAGVLL  
 1021 HMSEEQAFEM LKFLMYDLGF RKQYRPDMMS LQIQMYQLSR LHLDYHRDLY NHEENEISP  
 1081 SLYAAPWFLT LFASQFSLGF VARVFDIIFL QGTEVIFKVA LSLSSQETL IMECESFENI  
 1141 VEFLKNTLPD MNTSEMEKII TQVFEMDISK QHAYEVEYH VLQDELQESS YSCEDSETLE  
 1201 KLERANSQK RQNDLLEKL QVAHTKIQAL ESLENLLETR ETMKMSLIRT LEQEKMAYQK  
 1261 TVEQLRKLPL ADALVNCDDL LRDLCNPNP KAKIGNPK

>gi|67473227|sp|O60343.2|TBCD4\_HUMAN RecName: Full=TBC1 domain family member 4; AltName: Full=Akt substrate of 160 kDa; Short=AS160

MEPPSCIQDEPFPHPLEPEPGVSAQPGPKPSDKRFRLWYVGGSCLDHRTTLPMLPWLMAEIRRRSQKPE  
 AGGCGAPAAREVILVLSAPFLRCVPAPGAGASGGTSPSATQPNPAVFIHKAQHISRFIHNSHDLTYFA  
 YLIKAQPPDDPESQMACHVFRATDPSQVPDVISSIRQLSKAAMKEDAKPSKDNEAFYNSQKFEVLYCGKV  
 TVTHKKAPSSLIDDCMEKFSLHEQQRLKIQQEQRGPDPEGLADLEVVPVGPSPGDCLPEEADGTDTHLGL  
 PAGASQPALTSSRVCFPERILEDSGFDEQQEFRSRCSSTVGVQRRVHEGSQKSQPRRRAHAPSHVQPSD  
 SEKNRSTMLFQVGRFEINLISPDTKSVVLEKNFKDISSCSQGIKHVDFHFGFICRESPEPGLSQYICYVFCQ  
 ASESIVDEVM LTLKQAFSTAALQSAKTQIKLCEACPMHSLHKLCERIEGLYPPRAKLVIQRHLSSLTDN  
 EQADIFERVQKMKPVSDQEE NELVILHLRQLCEAKQKTHVHIGEGPSTISNSTIPENATSSGRFKLDILK  
 NKAARSLTSSLENIFSRGANRMRGRGLGSDSFERSNSLASEKDYSPGDSPGTTPASPPSSAWQTFPEED  
 SDSQFRRRAHFSHPPSSTKRKLNLDQGR AQGVRSPLLRQSSSEQCSNLSSVRRMYKESNSSSLSPLSH  
 TSFSAPSFTA PSFLKSFYQNSGRLSPOYEN EIRQDTASES SDGEGKRRTSSTCSNESLSVGGTSVTPPRI  
 SWRQRIFLRVASPMNSKPSAMQQDGLDRNELLPLSPLSPTMEEEPLVVF LSGEDDPEKIEERKKSKELR  
 SLWRKAIHQQILLRMEKENQKLEASRDELQSRKVKLDYEEVAGVLLHMHSEEQAFEM LKFLMYDLGFRKQYRPDMMS  
 LQIQMYQLSRLLHDYHRDLYNHEENEISPSLYAAPWFLTLFASQFSLGFVARVFDIIFLQGEVIFKVA  
 LSLSSQETLIMECESFENIVEFLKNTLPDMNTSEMEKIIITQVFEMDISKQLHAYEVEYHVLQDELQESS  
 YSCEDSETLEKLERANSQKLRQNDLLEKLQVAHTKIQALESLENLLETR ETMKMSLIRTLEQEKMAYQK

|                                                                                                                                                                                                                                                                                                                                                                                                                                                                                                                                                                                                                                                                                                                                                                                                                                                                                                                                                                                                                                                                                                                                                                                                                                                                                                                                                                                                                                                                                                                                                                                                                                                                                                                                                                                                                                                                                                                                                                                                                                                                                                                                                                                                                                                                                                                                                                                                                                                                                                                                                                                                                                                                                                                                                                                                                                                                                                                                                                                                                                                                                                                                                                                                                                                                              |  |
|------------------------------------------------------------------------------------------------------------------------------------------------------------------------------------------------------------------------------------------------------------------------------------------------------------------------------------------------------------------------------------------------------------------------------------------------------------------------------------------------------------------------------------------------------------------------------------------------------------------------------------------------------------------------------------------------------------------------------------------------------------------------------------------------------------------------------------------------------------------------------------------------------------------------------------------------------------------------------------------------------------------------------------------------------------------------------------------------------------------------------------------------------------------------------------------------------------------------------------------------------------------------------------------------------------------------------------------------------------------------------------------------------------------------------------------------------------------------------------------------------------------------------------------------------------------------------------------------------------------------------------------------------------------------------------------------------------------------------------------------------------------------------------------------------------------------------------------------------------------------------------------------------------------------------------------------------------------------------------------------------------------------------------------------------------------------------------------------------------------------------------------------------------------------------------------------------------------------------------------------------------------------------------------------------------------------------------------------------------------------------------------------------------------------------------------------------------------------------------------------------------------------------------------------------------------------------------------------------------------------------------------------------------------------------------------------------------------------------------------------------------------------------------------------------------------------------------------------------------------------------------------------------------------------------------------------------------------------------------------------------------------------------------------------------------------------------------------------------------------------------------------------------------------------------------------------------------------------------------------------------------------------------|--|
| <p>TVEQLRKLKLPADALVNCDDLRLDNCNPNKAKIGNKP</p> <p><b>Notes</b><br/>This is a RabGAP implicated in insulin-stimulated regulation of GLUT4 trafficking and uptake of glucose from blood into tissues.</p> <p><b>References to 14-3-3 binding to TBC1D4 (AS160)</b><br/>Geraghty KM, Chen S, Harthill JE, Ibrahim AF, Toth R, Morrice NA, Vandermoere F, Moorhead GB, Hardie DG, MacKintosh C. Regulation of multisite phosphorylation and 14-3-3 binding of AS160 in response to IGF-1, EGF, PMA and AICAR. <i>Biochem J.</i> 2007 Oct 15;407(2):231-41.<br/>Ramm G, Larance M, Guilhaus M, James DE. A role for 14-3-3 in insulin-stimulated GLUT4 translocation through its interaction with the RabGAP AS160. <i>J Biol Chem.</i> 2006 Sep 29;281(39):29174-80.</p>                                                                                                                                                                                                                                                                                                                                                                                                                                                                                                                                                                                                                                                                                                                                                                                                                                                                                                                                                                                                                                                                                                                                                                                                                                                                                                                                                                                                                                                                                                                                                                                                                                                                                                                                                                                                                                                                                                                                                                                                                                                                                                                                                                                                                                                                                                                                                                                                                                                                                                           |  |
| <p><b>Human TGM2</b> tissue transglutaminase (Swissprot = P21980)</p> <p>1 MAEELVLERC DLELETNGRD HHTADLCREK LVVRRGQPFW LTLHFEGRNY EASVDSLTFSS<br/>61 VVTGPAPSQE AGTKARFPLR DAVEEGDWTAT TVVDQQDCTL SLQLTTPANA PIGLYRLSLE<br/>121 ASTGYQGSSV VLGHFILLFN AWC PADAVYL DSEERQEYV LTQQGFYQG SAKFIKNIPW<br/>181 NFGQFEDGIL DICLILLVDN PKFLKNAGR DCSRSSPVYV GRVVS GMVNC NDDQGVLLGR<br/>241 WDNNYGDGVS PMSWIGSVDI LRRWKNHGCQ RVYQGQWVF AAVACTVLR LGIPTRVVTN<br/>301 YNSAHDQNSN LLIEYFRNEF GEIQGDKSEM IWNFHCWVES WMTRPDLQPG YEGWQALDPT<br/>361 PQEKSEGTYC CGPVVRAIK EGDLS TKYDA PFVFAEVNAD VVDWIQQDDG SVHKSINRSL<br/>421 IVGLKISTKS VGRDEREDIT HTYKYPEGSS EEREAFTAN HLNKLAKEKE TGMAMRIRVG<br/>481 QSMNMGSDFD VFAHTNNTA EEVCRLLLC ARTVSYNGIL GPECGTKYLL NLNLEPFSEK<br/>541 SVPLCILYEK YRDCLTESNL IKVRALLVEP VINSYLLAER DLYLENPEIK IRILGEPKQK<br/>601 RKLVAEVSQ NPLPVALEGC TFTVEGAGLT EEQKTVEIPD PVEAGEEVKV RMDLLPLHMG<br/>661 LHKLVVNFES DKLKAVKGFR NVIIGPA</p> <p>&gt;gi 20141877 sp P21980.2 TGM2_HUMAN RecName: Full=Protein-glutamine gamma-glutamyltransferase 2; AltName: Full=Tissue transglutaminase; AltName: Full=TGase C; Short=TGC; Short=TG(C); AltName: Full=Transglutaminase-2; AltName: Full=TGase-H</p> <p>MAEELVLERCDLELETNGRDHHTADLCREKLVVRRGQPFWLTTLHFEGRNYEASVDSLTFSSVVTGPAPSQE<br/>AGTKARFPLRDAVEEGDWTATVVDQQDCTLSLQLTTPANAPIGLYRLSLEASTGYQGSSVVLGHFILLFN<br/>AWCPADAVYLDSEERQEYVLTQQGFYQGS AKFIKNIPW NFGQFEDGILDICLILLVDNPKFLKNAGR<br/>CSRSSPVYVGRVVS GMVNCNDDQGVLLGRWDNNYGDGVS PMSWIGSVDILRRWKNHGCQRVYQGQWVF<br/>AAVACTVLRCLGIPTRVVTN YNSAHDQNSNLLIEYFRNEFGEIQGDKSEMIWNFHCWVESWMTRPDLQPG<br/>YEGWQALDPTPQEKSEGTCCGPVVRAIKEGDLSTKYDAPFVFAEVNADVVDWIQQDDG SVHKSINRSL<br/>IVGLKISTKSVGRDEREDITHTYKYPEGSS EEREAFTANHLNKLAEKEETGMAMRIRVQSMNMGSDFD<br/>VFAHTNNTAEEVCRLLLCARTVSYNGILGPECGTKYLLNLNLEPFSEKSVPLCILYEKYRDCLTESNL<br/>IKVRALLVEP VINSYLLAERDLYLENPEIKIRILGEPKQK RKLVAEVSQ NPLPVALEGC TFTVEGAGLT<br/>EEQKTVEIPDPVEAGEEVKVRMDLLPLHMG LHKLVVNFESDKLKAVKGFRNVIIGPA</p> <p><b>Notes</b><br/>TGM2 an enzyme of the transglutaminase family that catalyzes the crosslinking of proteins and the conjugation of polyamines to proteins. While the primary structure of transglutaminases is not conserved, they all have the same amino acid sequence at their active sites and their activity is calcium-dependent. The protein encoded by this gene acts as a monomer, is induced by retinoic acid, and appears to be involved in apoptosis. Is the autoantigen in coeliac disease and plays a role in apoptosis, cellular differentiation and matrix stabilisation. Three alternatively spliced isoforms have been described.<br/>14-3-3 co-immunoprecipitated with TG2 antiserum after activation of PKA from mouse embryonic fibroblasts (MEF)(TG2+/+) cells but not from MEF(TG2-/-) cells. In summary, we provide convincing evidence that phosphorylation of TG2 by PKA creates binding site(s) for 14-3-3 both in vitro and in vivo. <a href="#">This is a phosphoSer-Pro site, not conventional for PKA or 14-3-3.</a></p> <p><b>References to 14-3-3 binding to TGM2</b><br/>Mishra S, Murphy LJ. Phosphorylation of transglutaminase 2 by PKA at Ser216 creates 14-3-3 binding sites. <i>Biochem Biophys Res Commun.</i> 2006 Sep 8;347(4):1166-70.</p> |  |
| <p><b>Human TH</b> Tyrosine 3-hydroxylase is an enzyme involved in the conversion of tyrosine to dopamine. (Swissprot = P07101)</p> <p>1 MPTDPATTPQ AKGFRAVSE LDAKQAEAIM VRGQGAPGFS LTGSPWPGTA APAASYTPTP<br/>61 RSPRFIGRRQ SLIEDARKER EAAVAAAAAA VPSEPGDPLE AVAFEEKEGK AVLNLLFSR<br/>121 ATKPSALSRA VKVFETFEAK IHHLETRPAQ RPRAGGPHLE YFVRLEVRRG DLAAALLSGVR<br/>181 QVSEVDRSPA GPKVPWFPRK VSELDKCHHL VTKFDPDL DL DHPGFSQVY RQRRKLIAEI<br/>241 AFQYRHGDPI PRVEYTAEEI ATWKEVYTTL KGLYATHACG EHLEAFALLE RFSGYREDNI<br/>301 PQLEDVSRFL KERTGFQLRP VAGLLSARDF LASLAFRVFQ CTQYIRHASS PMHSPEPDC<br/>361 HELLGHVPLM ADRTFAQFSQ DIGLASLGAS DEEIEKLSTL SWFTVEFGLC KQNEVKAYG<br/>421 AGLLSSYGEL LHCLSEPEI RAFDPEAAAV QPYQDQTYQS VYFVSEFSFD AKDKLRSYAS<br/>481 RIQRPFVSKF DPYTLAIDVL DSPQAVRRSL EGVQDELDTL AHALSAIG</p> <p>&gt;gi 239938945 sp P07101.5 TY3H_HUMAN RecName: Full=Tyrosine 3-monooxygenase; AltName: Full=Tyrosine 3-hydroxylase; Short=TH</p> <p>MPTDPATTPQAKGFRAVSELDKQAEAIMVRGQGAPGFSLTGSPWPGTAAPAASYTPTPRSPRFIGRRQ<br/>SLIEDARKER EAAVAAAAAAVPSEPGDPLEAVAFEEKEGKAVLNLLFSRATKPSALSRAVKVFETFEAK<br/>IHHLETRPAQRPRAGGPHLEYFVRLEVRGDLAALLSGVRRQVSEVDRSPAGPKVPWFPRK VSELDKCHHL<br/>VTKFDPDL DHPGFSQVYRQRRKLIAEIAFQYRHGDPI PRVEYTAEEIATWKEVYTTLKGLYATHACG<br/>EHLEAFALLERFSGYREDNIPQLEDVSRFLKERTGFQLRPVAGLLSARDFLASLAFRVFQCTQYIRHASS<br/>PMHSPEPDCHELLGHVPLADRTFAQFSQDIGLASLGASDEEIEKLSTLYWFTVEFGLCKQNEVKAYG<br/>AGLLSSYGEL LHCLSEPEIRAFDPEAAAVQPYQDQTYQSVYFVSEFSFD AKDKLRSYASRIQRPFVSKF<br/>DPYTLAIDVLDSPQAVRRSL EGVQDELDTLAHALSAIG</p> <p><b>Notes</b><br/>Two 14-3-3-binding sites on tyrosine hydroxylase are RRAVpS<sup>19</sup>ELD and IGRRQpS<sup>40</sup>LIEDA (= Ser70 in P07101)</p> <p><b>References to 14-3-3 binding to tyrosine hydroxylase</b><br/>Itagaki C, Stimulus-coupled interaction of tyrosine hydroxylase with 14-3-3 proteins. <i>Biochemistry.</i> 1999 Nov</p>                                                                                                                                                                                                                                                                                                                                                                                                                                                                                                                                                                                                                                                                                                                                                                                                                                                                                                                                                                                                                                                                                                                                                                                                                                                                                                                                                                                  |  |

23;38(47):15673-80  
 Obsilova V, The 14-3-3 protein affects the conformation of the regulatory domain of human tyrosine hydroxylase. *Biochemistry*. 2008 Feb 12;47(6):1768-77. Epub 2008 Jan 9  
 Wang J, Lou H, Pedersen CJ, Smith AD, Perez RG. 14-3-3zeta contributes to tyrosine hydroxylase activity in MN9D cells: Localization of dopamine regulatory proteins to mitochondria. *J Biol Chem*. 2009 May 22;284(21):14011-9.  
 Ichimura T, Isobe T, Okuyama T, Yamauchi T, Fujisawa H. Brain 14-3-3 protein is an activator protein that activates tryptophan 5-monooxygenase and tyrosine 3-monooxygenase in the presence of Ca<sup>2+</sup>, calmodulin-dependent protein kinase II. *FEBS Lett*. 1987 Jul 13;219(1):79-82.  
 Kleppe R, Toska K, Haavik J. Interaction of phosphorylated tyrosine hydroxylase with 14-3-3 proteins: evidence for a phosphoserine 40-dependent association. *J Neurochem*. 2001 May;77(4):1097-107.  
 Halskau O Jr, Ying M, Baumann A, Kleppe R, Larrea DR, Almaas B, Haavik J, Martinez A. Three-way interaction between 14-3-3 proteins, the N-terminal region of tyrosine hydroxylase and negatively charged membranes. *J Biol Chem*. 2009 Sep 28. [Epub ahead of print]

**Human Tiam1** T-cell lymphoma invasion and metastasis 1 (Swissprot = Q13009)

```

1  MGNAESQHVH  HEFYGEKHAS  LGRKHTSRSL  RLSHKTRRTR  HASSGKVIHR  NSEVSTRSS
61  TPSIPQSLAE  NGLEPFSQDG  TLEDFGSPIW  VDRVDMGLRP  VSYTDSVTP  SVDSSIVLTA
121 ASVQSMPTDE  ESRLYGDDAT  YLAEGGRRQH  SYTSNGPTFM  ETASFKKKRS  KSAADIWREDS
181 LEFSLSDLSQ  EHLTSNEEIL  GSAEEKDCEE  ARGMETRASP  RQLSTCQRAN  LGDLYAQKN
241 SGVTANGGPG  SKFAGYCRNL  VSDIPNLANH  KMPFAAAEET  PPYSNYNTLP  CRKSHCLSEG
301 ATNPQISHSN  SMQGRRAKTT  QDVNAGEGSE  FADSGIEGAT  TDTDLLSRRS  NATNSSYSPT
361 TGRAVFGSDS  GSSSTGDAAR  QGVYENFRRE  LEMSTTNSES  LEEAGSAHSD  EQSSGTLSSP
421 GQSDILLTAA  QGTVRKAGAL  AVKNFLVHKK  NKKVESATRR  KWKHYWVSLK  GCTLFFYESD
481 GRSgidhnsi  PKHAVVWENS  IVQAVPEHPK  KDFVFCLSNS  LGDAFLFQTT  SQTELENWIT
541 AIHSACATAV  ARHHKEDTL  RLLKSEIKKL  EQKIDMDEKM  KKMGMQLSS  VTDKSKKTI
601 LDQIFVWEQN  LEQFQMDLFR  FRCYLASLQG  GELPNPKRLL  AFASRPTKVA  MGRLGIFSVS
661 SFHALVAART  GETGVRRTQ  AMSRSASKRR  SRFSSLWGLD  TTSKKKQGRP  SINQVFEGGT
721 EAVKKSLEGI  FDDIVPDGKR  EKEVVLNVH  QHNPDCDIWV  HEYFTPSWFC  LPNNQPALTV
781 VRPGDTARDT  LELICKTHQL  DHSAHYLRK  FLIENKMQLY  VPQPEEDIYE  LLYKEIEICP
841 KVTQSIHIEK  SDTAADTYGF  SLSSVEEDGI  RRLYVNSVKE  TGLASKKGLK  AGDEILEINN
901 RAADALNSSM  LKDFLSQPSL  GLLVRTYPEL  EEGVELLESP  PHRVDGPADL  GESPLAFLTS
961 NPGHSLCSEQ  GSSAETAPEE  TEGPDLESSD  ETDHSSKSTE  QVAAFCRSLH  EMNPSDQSPS
1021 PQDSTGQPLA  TMRQLSDADK  LRKVICELLE  TERTYVKDLN  CLMERYLKPL  QKETFLTQDE
1081 LDVLFNLT  MVEFQVEFLK  TLEDGVRVLP  DLEKLEKVDQ  FKKVFLSLGG  SFLYADRFRK
1141 LYSAFCAHST  KVPKVLVKK  TDTAFKAFLD  AQNPKQHQSS  TLESYLIKPI  QRILKYPLLL
1201 RELFALTD  SEEHYHLDVA  IKTMNKVASH  INEMQKIH  EFGAVFDQLIA  EQTGEKKEVA
1261 DLMDGDL  TTVIWLNPPA  SLGKWKKEPE  LAAFVFKTAV  VLVKDQSKQ  KKKLVGSHRL
1321 SIYEDWDF  FRHMIPTEAL  QVRALASADA  EANAVCEIVH  VKSESEGRPE  RVFHLCCSSP
1381 ESRKDFL  HSIILRDKH  RRLARNRFT  IDSDAVSAS  SPEKE  SQQPPGGGDT  DRWVEEQFDL  AQYEEQDDIK  KTLDSHASRM  AQLKKQAALS
1501 ETDILSD  DDFCESV  KGASV  DRDLQERL  QATSI  SQREGR  KTLDSHASRM  AQLKKQAALS
1561 GINGGLES  ASEVIW  RREDFAP  SRKLNTE  I

```

THREE  
 PHOSPHORYLATED  
 SITES IMPLICATED  
 IN 14-3-3  
 BINDING. NOT IN  
 WEBLOGO.

>gi|152031709|sp|Q13009.2|TIAM1\_HUMAN RecName: Full=T-lymphoma invasion and metastasis-inducing protein 1; Short=TIAM-1

```

MGNAESQHVHEHEFYGEKHASLGRKHTSRSLRLSHKTRRTRHASSGKVIHRNSEVSTRSSSTPSIPQSLAE
NGLEPFSQDGTLEDFGSPWVDRVDMGLRPVSYTDSVTPSPVDSSIVLTAASVQSMPTDEESRLYGDDAT
YLAEGGRRQHSYTSNGPTFMETASFKKKRSKSAADIWREDSLEFSLSDLSEHLTSNEEILGSAEEKDCEE
ARGMETRASPRLSTCQRANSLGDLYAQKNSGVTANGGPGSKFAGYCRNLVSDIPNLANHKMPFAAAEET
PPYSNYNTLPCRKSHCLSEGATNPQISHSNMQRRAKTTQDVNAGEGSEFADSGIEGATDTDLLSRRS
NATNSSYSPTTGRAVFGSDSGSSSTGDAARQGVYENFRRELEMSTTNSESLLEEAGSAHSDQSSGTLSSP
GQSDILLTAAQGTVRKAGALAVKNFLVHKKKVKVESATRRKWKHYWVSLKGCCTLFFYESDGRSGIDHNSI
PKHAVVWENSIVQAVPEHPKDFVFCLNSLGDGDAFLFQTTTQTELENWITAIHSACATAVARHHKEDTL
RLLKSEIKKLEQKIDMDEKMKMGEMQLSSVTDKSKKTIILDQIFVWEQNLEQFQMDLFRFRCYLASLQG
GELPNPKRLLAFASRPTKVMGRGLGIFSVSSFHALVAARTGETGVRRTQAMRSRSASKRRSRFSSLWGLD
TTSKKKQGRPSINQVFEGGTEAVKKSLEGI FDDIVPDGKREKEVVLNVHQHNPDCDIWVHEYFTPSWFC
LPNNQPALTVRPGDTARDTLELICKTHQLDHSAHYLRKFLIENKMQLYVPQPEEDIYELLYKEIEICP
KVTQSIHIEKSDTAADTYGFLSSVEEDGIRRLYVNSVKE TGLASKKGLKAGDEILEINNRAADALNSSM
LKDFLSQPSLGLLVRTYPELEEGVELLESPHRVDGPADLGESPLAFLTSNPGHSLCSEQGSSAETAPEE
TEGPDLESSDET DSHSSKSTEQVAAFCRSLHEMNPSDQSPSPQDSTGQPLATMRQLSDADKLRKVICELLE
TERTYVKDLNCLMERYLKPLQKETFLTQDELDVLFNLT MVEFQVEFLK TLEDGVRVLP DLEKLEKVDQ
FKKVFLSLGGSFLYADRFRKLYSAFCASHTKVPKVLVKK TDTAFKAFLD AQNPKQHQSS TLESYLIKPI
QRILKYPLLLRELFALTD AEEHYHLDVA IKTMNKVASH INEMQKIH EFGAVFDQLIA EQTGEKKEVA
DLMDGDL LHTTVIWLNPPASLGKWKKEPELAAFVFKTAVVLVKDQSKQKKLVGSHRLSIYEDWDFR
FRHMIPTEALQVRALASADA EANAVCEIVHVKSESEGRPERVHFHLCCSSPESRKFALVHHSILRDKHRR
QLLKTESLPSSQYVFFGGKRLCALKGARPA MRSRAVSAPSKSLGRRRRRLARNRFTIDSDAVSASPEKE
SQQPPGGGDTDRWVEEQFDLAQYEEQDDIKETDILSDDDDFCESVKGASVDRDLQERLQATSI SQREGR
KTLDSHASRM AQLKKQAALSGINGGLESASEVIW RREDFAP SRKLNTE I

```

**Notes**

Human Tiam 1 was reported to bind directly in a phosphorylation-dependent manner by Pozuelo Rubio et al (2004).  
 Woodstock et al studied mouse Tiam1. "There are four putative phospho-serine-containing 14-3-3 binding motifs, and we confirm that two of them (Ser172 and Ser231) are phosphorylated in cells using mass spectrometry. Moreover, we show that phosphorylation at three of these motifs (containing Ser60, Ser172 and Ser231) is required for the binding of 14-3-3 proteins to this region of Tiam1. We show that phosphorylation of these sites does not affect Tiam1 activity; significantly however, we demonstrate that phosphorylation of the Ser60-containing motif is



|                                                                                                                                                                                                                                                                                                                                                                                                                                                                                                                                                                                                                                                                                                                                                                                                                                                                                                                                                                                                                                                                                                                                                                                                                                                                                                                                                                                                                                                                                                                                                                                                                                                                                                                                                                                                                                                                                                                                                                                                                                                                                                                                                                                                                                                                                                                                                                                                        |  |
|--------------------------------------------------------------------------------------------------------------------------------------------------------------------------------------------------------------------------------------------------------------------------------------------------------------------------------------------------------------------------------------------------------------------------------------------------------------------------------------------------------------------------------------------------------------------------------------------------------------------------------------------------------------------------------------------------------------------------------------------------------------------------------------------------------------------------------------------------------------------------------------------------------------------------------------------------------------------------------------------------------------------------------------------------------------------------------------------------------------------------------------------------------------------------------------------------------------------------------------------------------------------------------------------------------------------------------------------------------------------------------------------------------------------------------------------------------------------------------------------------------------------------------------------------------------------------------------------------------------------------------------------------------------------------------------------------------------------------------------------------------------------------------------------------------------------------------------------------------------------------------------------------------------------------------------------------------------------------------------------------------------------------------------------------------------------------------------------------------------------------------------------------------------------------------------------------------------------------------------------------------------------------------------------------------------------------------------------------------------------------------------------------------|--|
| <p>required for the degradation of Tiam1. (Woodcock et al 2009)" Tiam1 is a GEF for Rac. Note that phosphorylation at Ser60 was not shown directly, but mutation of this residue had functional effect. Not yet clear how three phosphorylated sites might contribute to 14-3-3 binding of Tiam1.</p> <p><b>References to 14-3-3 binding to Tiam1</b><br/> Pozuelo Rubio M, Geraghty KM, Wong BH, Wood NT, Campbell DG, Morrice N, Mackintosh C. 14-3-3-affinity purification of over 200 human phosphoproteins reveals new links to regulation of cellular metabolism, proliferation and trafficking. <i>Biochem J.</i> 2004 Apr 15;379(Pt 2):395-408.<br/> Woodcock SA, Jones RC, Edmondson RD, Malliri A. A Modified Tandem Affinity Purification Technique Identifies That 14-3-3 Proteins Interact with Tiam1, an Interaction Which Controls Tiam1 Stability. <i>J Proteome Res.</i> 2009 Nov 9. [Epub ahead of print]</p>                                                                                                                                                                                                                                                                                                                                                                                                                                                                                                                                                                                                                                                                                                                                                                                                                                                                                                                                                                                                                                                                                                                                                                                                                                                                                                                                                                                                                                                                        |  |
| <p><b>Human TP53</b> p53 (Swissprot = P04637)</p> <p>1 MEEPQSDPSV EPPLSQETFS DLWKLLENV VLSPLPSQAM DDLMLSPDDI EQWFTEDPGP<br/> 61 DEAPRMPEAA PRVAPAPAAP TPAAPAPAPS WPLSSSVPSQ KTYQGSYGFR LGFLHSGTAK<br/> 121 SVTCTYSPAL NKMFQQLAKT CPVQLWVDST PPGTRVRAM AIYKQSQHMT EVVRRCPHHE<br/> 181 RCDSDSGLAP PQHLIRVEGN LRVEYLDDRN TFRHSVVVPY EPPEVGSDDCT TIHYNMNCNS<br/> 241 SCMGGMNRRP ILTIITLED SGNLLGRNSF EVRVCACPR DRTEENLR KKGEPHHEL<br/> 301 PGSTKRALPN NTSSSPQPK KPLDGEYFTL QIRGRERFEM FRELNEALEL KDAQAGKEPG<br/> 361 GSRAHSHL SKKGQSTSRH KKLMPKTEG DSD</p> <p>&gt;gi 205829174 sp P04637.3 P53_HUMAN RecName: Full=Cellular tumor antigen p53;<br/> AltName: Full=Tumor suppressor p53; AltName: Full=Phosphoprotein p53;<br/> AltName: Full=Antigen NY-CO-13<br/> MEEPQSDPSVEPPLSQETFS DLWKLLENVLSPLPSQAMDDLMLSPDDIEQWFTEDPGPDEAPRMPEAA<br/> PRVAPAPAAPTPAAPAPAPSWPLSSSVPSQKTYQGSYGFRLGFLHSGTAKSVTCTYSPALNKMFQQLAKT<br/> CPVQLWVDSTPPPGTRVRAMAIYKQSQHMTVEVRRCPHHERCSDSDGLAP PQHLIRVEGNLRVEYLDDRN<br/> TFRHSVVVPYEPPEVGSDDCTTIHYNMNCNSCMGGMNRRPILTIITLED SGNLLGRNSF EVRVCACPR<br/> DRTEENLRKKGEPHHELPPGSTKRALPNNTSSSPQPKKPLDGEYFTLQIRGRERFEMFRELNEALEL<br/> KDAQAGKEPGGSRAHSHL SKKGQSTSRHKKLMPKTEGPDSD</p> <p><b>Notes</b><br/> <b>References to 14-3-3 binding to TP53 (p53)</b><br/> Rajagopalan S, Jaulent AM, Wells M, Veprintsev DB, Fersht AR. 14-3-3 activation of DNA binding of p53 by enhancing its association into tetramers. <i>Nucleic Acids Res.</i> 2008 Oct;36 (18):5983-91<br/> Waterman MJ, Stavridi ES, Waterman JL, Halazonetis TD. ATM-dependent activation of p53 involves dephosphorylation and association with 14-3-3 proteins. <i>Nat Genet.</i> 1998 Jun;19(2):175-8.<br/> Lee MK, Sabapathy K. Phosphorylation at carboxyl-terminal S373 and S375 residues and 14-3-3 binding are not required for mouse p53 function. <i>Neoplasia.</i> 2007 Sep;9(9):690-8.<br/> Huang WG, Cheng AL, Chen ZC, Peng F, Zhang PF, Li MY, Li F, Li JL, Li C, Yi H, Li XH, Yi B, Xiao ZQ. Targeted proteomic analysis of 14-3-3 sigma in nasopharyngeal carcinoma. <i>Int J Biochem Cell Biol.</i> 2009 Oct 11. [Epub ahead of print]<br/> Rajagopalan S, Sade RS, Townsley FM, Fersht AR. Mechanistic differences in the transcriptional activation of p53 by 14-3-3 isoforms. <i>Nucleic Acids Res.</i> 2009 Nov 20. [Epub ahead of print]</p>                                                |  |
| <p><b>Human TPD52L1</b> Tumour protein D53 (also known as PrLZ and hD53) (Swissprot = Q16890)</p> <p>1 MEAAQGLLE TEPLQGTDED AVASADFSM LSEEEKEELK AELVQLEDEI TTLRQVLSAK<br/> 61 ERHLVEIKQK LGMNLMNELK QNFSSKSWHDM QTTAYKKTH ETLSHAGQKA TAAFSNVGTA<br/> 121 ISKFGDMSY SIRHSISMPA MRNSPTFKSF EERVETT VTS LKTKVGGTNP NGGSFEEVLS<br/> 181 STAHASQSL AGGSRRTKEE ELQC</p> <p>&gt;gi 12585368 sp Q16890.1 TPD53_HUMAN RecName: Full=Tumor protein D53;<br/> Short=hD53; AltName: Full=Tumor protein D52-like 1<br/> MEAAQGLLETEPLQGTDED AVASADFSMLSEEEKEELK AELVQLEDEITTLRQVLSAKERHLVEIKQK<br/> LGMNLMNELKQNFSSKSWHDMQTTAYKKTHETLSHAGQKATAAFAFSNVGTAISKFGDMSYSIRHSISMPA<br/> MRNSPTFKSF EERVETT VTS LKTKVGGTNPNGGSFEEVLSSTAHASQSLAGGSRRTKEEELQC</p> <p><b>Notes</b><br/> D52 (TPD52)-like proteins are coiled-coil motif-bearing proteins first identified through their expression in human breast carcinoma, which have been proposed to represent signalling intermediates and regulators of vesicle trafficking. The canonical sequence is P55327-1 (different from that shown). Boutros et al (2003) and Boutros and Byrne (2005) worked on the hD53 (TPD52L1) version, which is shown. There are other splice variants. A sequence alignment of the various forms is given in Wang et al (2009). 14-3-3-binding site, encoded by exon 6, defined by mutagenesis in a yeast 2-hybrid assay by Boutros et al (2003). Some other splice variants lack the proposed 14-3-3 binding site. Wang et al (2009) worked with the longest isoform that they refer to as Genbank GQ499328 = Prostate-specific PrLZ-247 (247 is the longest isoform).</p> <p><b>References to 14-3-3 binding to TPD52 (also known as PrLZ and hD53)</b><br/> Boutros R, Bailey AM, Wilson SH and Byrne JA. Alternative splicing as a mechanism for regulating 14-3-3 binding: interactions between hD53 (TPD52L1) and 14-3-3 proteins. <i>J. Mol. Biol.</i> 332 (2003), 675-687.<br/> Boutros R and Byrne JA. D53 (TPD52L1) is a cell cycle-regulated protein maximally expressed at the G2-M transition in breast cancer cells. <i>Exp. Cell Res.</i> 310 (2005), 152-165.<br/> Wang R, He H, Sun X, Xu J, Marshall FF, Zhou H, Chung LW, Fu H, He D. Transcription variants of the prostate-specific PrLZ gene and their interaction with 14-3-3 proteins. <i>Biochem Biophys Res Commun.</i> 2009 Sep 1. [Epub ahead of print]</p> |  |
| <p><b>Human TPH2</b> Neuronal tryptophan hydroxylase (TPH2) an enzyme that is rate-limiting in the biosynthesis of serotonins (Swissprot = Q8IWU9)</p> <p>1 MQPAMMMFSS KYWARRGFS L DSAVPEEHQL LGSSTLNKPN SGKNDKGNK GSSKREAAATE<br/> 61 SQKTAVVFS L KNEVGGLVKA LRLFQEKRVN MVHIESRKS RRSSEVEIFV DCECGKTEFN<br/> 121 ELIQLLKFQT TIVTLNPPEN IWTEEELEED VPWFPRKISE LDKCSHRVLM YGSELDADHP<br/> 181 GFKDNVYRQR RKYFVDVAMG YKYGQPIPRV EYTEETKTW GVVFRELSKL YPTHACREYL<br/> 241 KNFPLLT KYC GYREDNVPQL EDVSMFLKER SGFTVRPVAG YLSPRDFLAG LAYRVFHCTQ<br/> 301 YIRHGS DPLY TPEPDTCH EL GHVPLLADP KFAQFSQEI G LASLGASDED VQKLATCYFF<br/> 361 TIEFGLCKQE GQLRAYGAGL LSSIGELKHA LSDKACVKAF DPKTTCLQEC LITTFQEAYF</p>                                                                                                                                                                                                                                                                                                                                                                                                                                                                                                                                                                                                                                                                                                                                                                                                                                                                                                                                                                                                                                                                                                                                                                                                                                                                                                                                                                                                                                                                                                                                                                                                                                                                                                  |  |

|                                                                                                                                                                                                                                                                                                                                                                                                                                                                                                                                                                                                                                                                                                                                                                                                                                                                                                                                                                                                                                                                                                                                                                                                                                                                                                                                                                                                                                                                                                                                                                                                                                                                                                                                                                                                                                                                                                                                                                                                                                                                                                                                                                                                                                                                                                                                                                                                                                                                                                                                                                                                                                                                                                                                                                                                                                                                                                                                                                                                                                                                                                                                                                                                                                                                                                                                                                         |  |
|-------------------------------------------------------------------------------------------------------------------------------------------------------------------------------------------------------------------------------------------------------------------------------------------------------------------------------------------------------------------------------------------------------------------------------------------------------------------------------------------------------------------------------------------------------------------------------------------------------------------------------------------------------------------------------------------------------------------------------------------------------------------------------------------------------------------------------------------------------------------------------------------------------------------------------------------------------------------------------------------------------------------------------------------------------------------------------------------------------------------------------------------------------------------------------------------------------------------------------------------------------------------------------------------------------------------------------------------------------------------------------------------------------------------------------------------------------------------------------------------------------------------------------------------------------------------------------------------------------------------------------------------------------------------------------------------------------------------------------------------------------------------------------------------------------------------------------------------------------------------------------------------------------------------------------------------------------------------------------------------------------------------------------------------------------------------------------------------------------------------------------------------------------------------------------------------------------------------------------------------------------------------------------------------------------------------------------------------------------------------------------------------------------------------------------------------------------------------------------------------------------------------------------------------------------------------------------------------------------------------------------------------------------------------------------------------------------------------------------------------------------------------------------------------------------------------------------------------------------------------------------------------------------------------------------------------------------------------------------------------------------------------------------------------------------------------------------------------------------------------------------------------------------------------------------------------------------------------------------------------------------------------------------------------------------------------------------------------------------------------------|--|
| <p>421 VSESFEEAKE KMRDFAKSIT RPFVSIFYNPY TQSEILKDT RSIENVVQDL RSDLNTVCDA<br/>481 LNKMNQYLG I</p> <p>&gt;gi 30580625 sp Q8IWU9.1 TPH2_HUMAN RecName: Full=Tryptophan 5-hydroxylase 2;<br/>AltName: Full=Tryptophan 5-monooxygenase 2; AltName: Full=Neuronal tryptophan<br/>hydroxylase</p> <p>MQPAMMMFSSKYWARRGFSLDSAVPEEHQLLGSSTLNKPNKSGKNDKGNKGSKREAAATESGKTAVVFSL<br/>KNEVGGVLKALRFLFQEKRVNMVHIESRKSRRRSSEVEIFVDCECGKTEFNELIQLLKFQTTIVTLNPPEN<br/>IWTEEELEEDVWPFPRKISELKDCKSHRVLMYGSSELDADHPGFKDNVYRQRKRYFVDVAMGYKYGQPIPRV<br/>EYTEEBETKTWGVVFRRELSKLYPTHACREYLKKNFPLLTKYCYREDNVPQLEDVSMFLKERSGFTVVRPVAG<br/>YLSPRDFLAGLAYRVFHTQYIRHGSDDPLYTPEPDTCHELLGHVPLLDAPKFAQFSQEI GLASLGASDED<br/>VQKLATCYFFTIEFGLCKQEGQLRAYGAGLLSSIGELKHALSDKACVKAFDPKTTCLQECLITTFQEAIF<br/>VSESFEEAKEKMRDFAKSITRPFVSIFYNPY TQSEILKDT RSIENVVQDL RSDLNTVCDA LNKMNQYLG I</p> <p><b>Notes</b><br/>Catalyzes the bioppterin dependent monooxygenation of tryptophan to 5-hydroxytryptophan (5HT), which is<br/>subsequently decarboxylated to form the neurotransmitter serotonin. Its expression is limited to a few specialized<br/>tissues: raphe neurons, pinealocytes, mast cells, mononuclear leukocytes, beta-cells of the islets of Langerhans, and<br/>intestinal and pancreatic enterochromaffin cells. Two alternatively spliced isoforms have been described. Isoform 2<br/>appears to be expressed exclusively in the brain, and is expressed at significantly higher levels in the raphe nuclei<br/>than isoform 1. In contrast with the WT enzyme, neither phosphorylated TPH2 S19E nor TPH2 S19A bound more<br/>strongly to 14-3-3 proteins than non-phosphorylated TPH2. However, when analysing the phosphorylated S104E<br/>mutants, the binding intensity to the 14-3-3g increased 50-fold relative to the non-phosphorylated S104E mutant<br/>enzyme. Thus phosphorylation-dependent binding to 14-3-3s was observed for all forms of TPH2 having an intact<br/>Ser<sup>19</sup> phosphorylation site. Although phosphorylation of Ser<sup>104</sup> did not appear to be directly involved in 14-3-3<br/>binding to TPH2, this phosphorylation site could contribute indirectly by increasing enzyme stability and<br/>stoichiometry of Ser<sup>19</sup> phosphorylation.</p> <p><b>References to 14-3-3 binding to tryptophan hydroxylase</b><br/>Winge I, McKinney JA, Ying M, D'Santos CS, Kleppe R, Knappskog PM, Haavik J. Activation and stabilization<br/>of human tryptophan hydroxylase 2 by phosphorylation and 14-3-3 binding. <i>Biochem J.</i> 2008 Feb 15;410(1):195-<br/>204<br/>Furukawa Y, Ikuta N, Omata S, Yamauchi T, Isobe T, Ichimura T. Demonstration of the phosphorylation-<br/>dependent interaction of tryptophan hydroxylase with the 14-3-3 protein. <i>Biochem Biophys Res Commun.</i> 1993 Jul<br/>15;194(1):144-9.</p>                                                                                                                                                                                                                                                                                                                                                                                                                                                                                                                    |  |
| <p><b>Human TSC2</b> Tuberin (Swissprot = P49815)</p> <p>1 MAKPTSKDGS LKEKFKILLG LGTPRPNPRS AEGKQTEFII TAEILRELSM ECGLNRRIRM<br/>61 IGQICEVAKT KKFEEHAVEA LWKAVADLLQ PERTLEARHA VLALLKAI VQ GQGERLGVLR<br/>121 ALFFKVIKDY PSNEDLHERL EVFKALTDNG RHITYLEEL ADFVLQWMDV GLSSEFLVLV<br/>181 VNLVKFNCSY LDEYIARMVQ MICLLCVRTA SSV DIEVSLQ VLDVAVVCYNC LPAESLPLFI<br/>241 VTLCRTINVK ELCEPCWKLM RNLGTHLGH SAIYNMCHLM EDRAVMEDAP LLRGAVFFVG<br/>301 MALWGAHRLY SLRNSPTS VF PSFYQAMACP NEVVSYEIVL SITRLIKKYR KELQVVAWDI<br/>361 LLNIIERLLQ QLQTLDSPEL RTIVHDLLTT VEELCDQNEF HGSQERYFEL VERCADQRPE<br/>421 SLLNLSISYR AQSIIHPAKDG WIQNLQALME RFRSESRGA VRIKVDVLS FVLLINRQFY<br/>481 EEELINSVVI SQLSHIPEDK DHQVRKLTQ LLDVLAEGCH THHFNSLLDI IEKVMARSL<br/>541 PPELEERDV AAYSASLEDV KTAVLGGLV LQTKLYTLPA SHATRVYEML VSHIQLHYKH<br/>601 SYTLPIASSI RLQAFDFLFL LRADSLHRLG LPNKDGVVRF SPYCVCDYME PERGSEKKT<br/>661 GPLSPPTGPP GPAPAGPAVR LGSVPYSLLF RVLLQCLKQE SDWKVLLKLV GRLPESLRYK<br/>721 VLIFTSPCSV DQLCSALCSM LSGPKTLERL RGAPEGFSRT DLHLAVVPVL TALISYHNYL<br/>781 DKTKQREVMY CLEQGLIHR C ARQCVALSI CSVEMPDII KALPVLVVKL THISATASMA<br/>841 VPLLEFLSTL ARLPHLYRNF AAEQYASVFA ISLPTYNPSK FNQYIVCLAH HVIAMWFIRC<br/>901 RLPFRKDFVP FITKGLRSNV LLSFDDTPEK DSFRARSTL NERPKSLRIA RPPKQGLNNS<br/>961 PPVKEFKESS AAEAFRCRSI SVSEHVVRSR IQTSLTSASL GSADENVAQ ADDSLKNLHL<br/>1021 ELTETCLDMM ARYVFSNFTA VPKRSPVGEF LLAGGRTKTW LVGNKLVTVT TSVGTGRSL<br/>1081 LGLDSGELQS GPESSSSPGV HVRQTKEAPA KLESQAGQQV SRGARDVRS MSGHGLRVG<br/>1141 ALDVPASQFL GSATSPGPRT APAAKPEKAS AGTRVPVQEK TNLAAYVPLL TQGWAEILVR<br/>1201 RPTGNTSWLM SLENPLSPFS SDINNMPLQE LSNALMAAER FKEHRDTALY KSLVPAAST<br/>1261 AKPPPLPRSN TVASFSSLYQ SSCQGLHRS VSWADSAVVM EEGSPGEVPV LVEPPGLEDV<br/>1321 EAALGMDRRT DAYSRSSVS SQEESLHAE ELVGRGPIPI RVVSSSEGRP SVDLSFQPSQ<br/>1381 PLSKSSSSPE LQTLQDILGD PGDKADVGR L SPEVKARSQS GTLDGESAAW SASGEDSRGQ<br/>1441 PEGPLPSSSP RSPSGLRPRG YTISDSAPSR RGRKVERDAL KSRATASNAE KVPGINPSFV<br/>1501 FLQLYHSPFF GDESINKPILL PNESQSFERS VQLLDQIPSY DTHKIAVLYV GEGQSNSELA<br/>1561 ILSNEHGSYR YTEFLTGLGR LIELKDCQPD KVLGGLDVC GEDGQFTYCW HDDIMQAVFH<br/>1621 IATLMPTKDV DKHRCDKRRH LGNDFVSIYV NDSGEDFKLG TIKQGFNFVH VIVTPLDYEC<br/>1681 NLVSLQCRKD MEGLVDTVA KIVSDRNLPF VARQMALHAN MASQVHHSRS NPTDIYPSKW<br/>1741 IARLRHKRL RQRICEEAY SNPSLPLVHP PSHSKAPAQT PAEPTPGYEV GQRKRLISSV<br/>1801 EDFTEFV</p> <p>&gt;gi 1717799 sp P49815.1 TSC2_HUMAN RecName: Full=Tuberin; AltName:<br/>Full=Tuberous sclerosis 2 protein</p> <p>MAKPTSKDGLKEKFKILLGLGTPRPNPRS AEGKQTEFII TAEILRELSMECGLNRRIRMIGQICEVAKT<br/>KKFEEHAVEALWKAVADLLQPERTLEARH AVLALLKAI VQ GQGERLGVLRALFFKVIKDY PSNEDLHERL<br/>EVFKALTDNGRHITYLEELAD FVLQWMDVGLSSEFLVLVNLVKFNCSYLDEYIARMVQMICLLCVRTA<br/>SSVDIEVSLQVLDVAVVCYNC LPAESLPLFI VTLCRTINVKELCEPCWKLMRNLGTHLGHSAIYNMCHLM<br/>EDRAVMEDAPLLRGAVFFVGMALWGAHRLYSLRNSPTS VFPSFYQAMACPNEVVSYEIVLSITRLIKKYR<br/>KELQVVAWDI LLNIIERLLQQLQTLDSPELRTIVHDLLTTVEELCDQNEFHGSQERYFELVERCADQRPE<br/>SLLNLSISYRAQSIIHPAKDGWIQNLQALMERFRSESRGAVRIKVDVLSFVLLINRQFYEEELINSVVI<br/>SQLSHIPEDKDHQVRKLTQQLLDVLAEGCHTHHFNSLLDI IEKVMARSLSPPELEERDVAAYSASLEDV<br/>KTAVLGGLV LQTKLYTLPA SHATRVYEMLVSHIQLHYKHSYTLPIASSIRLQAFDFL LRADSLHRLG<br/>LPNKDGVVRFSPYCVCDYMEPERGSEKKTSGPLSPPTGPPGAPAGPAVR LGSVPYSLLF RVLLQCLKQE<br/>SDWKVLLKLVGRLPESLRYKVLIFTSPCSV DQLCSALCSMLSGPKTLERLRGAPEGFSRTDLHLAVVPVL</p> |  |

TALISYHNYLDKTKQREVMVYCLEQGLIHRCARQCVALSICSVEMPDIIIKALPVLVVKLTHISATASMA  
 VPILLEFLSTLRLPHLYRNFAAEQYASVFAISLPTYNPSKFNQYIVCLAHVVIAMWFIKRCRPFPRKDFVP  
 FITKGLRSNVLLSFDTPKDSFRARSTSLNERPKSLRIARPPKQGLNNSPVPKFKESSAAEAFCRCSI  
 SVSEHVRSRIQTSLSASLGSADENSVAQADDSLKNLHLELTETCLDMMARYVFSNFTAVPKRSPVGEF  
 LLAGRRTKTWLVGNKLVTVTTSVGTGRSLRGLDLSGELQSGPESSSSPGVHVRQTKEAPAKLESQAGQQV  
 SRGARDVRSMSSGGHGLRVGALDVPASQFLGSATSPGPRTPAPAAKPEKASAGTRVPVQEKTNLAAVYVPLL  
 TQGWAEILVRRPTGNTSWLMSLENPLSPFSSDINNMPLOELSNALMAAERFKEHRDTALYKSLSVPAAS  
 AKPPPLPRSNVTASFSSLYQSSCQQLHRSVSWADSAVVMEEGSPGEVPLVEPPGLEEDVEAALGMDRRT  
 DAYSRSSSVSSQEEKSLHAEELVGRGPIPIERVVSEGGRRPSVDLSFQPSQPLSKSSSSPELQTLQDILGD  
 PGDKADVGRSLPEVKARSQSGTLDGESAAWSASGEDSRGQPEGLPSSSPRSPSGLRPRGYTISDSAPSR  
 RGRKVERDALKSRATASNAEKVPGINPSFVFLQLYHSPFFGDESINKPILLPNESQSFERSVQLLDQIPSY  
 DTHKIAYLVYVGEQNSSELAILLSNEHGSYRYTEFLTGLRLIELKDCQDPKRVYLGGLDVCGEDGQFTYCW  
 HDDIMQAVFHIAITLMPKTDVDKHRCDKRRHLGNDFVSIVYNDSGEDFKLGTIKGQFNFVHVIVTPLYDEC  
 NLVSLQCRKDMEGVLVDTSVAKIVSDRNLPFVARQMALHANMASQVHHSRNSNPTDIYPSKWIARLRHRIKRL  
 RQRICEEAAYSNSPLFLVHPFSSHKAPAQTPAEPTPGYEVGQRKRLISSVEDFTEFV

**Notes**

Two 14-3-3 binding sites are RSTpS<sup>939</sup>LN and KSLpS<sup>1210</sup>VP (=Ser1254 in P49815) (Liu et al 2002) whereas Ser1210 SWLMpS<sup>1210</sup>LENPLSPFS (=Ser1211 P49815) and not RSTpS<sup>939</sup>LN is reported by Li et al (2002).  
 Tuberin and Hamartin (TSC1) form a tumor suppressor heterodimer that inhibits the mTOR nutrient signaling. TSC1/TSC2 targets the small G protein Rheb, a novel mediator of the nutrient signaling input to mTOR. Functions as a Rheb GTPase activating protein (GAP). Four alternatively spliced isoforms have been described.  
 TSC2 mutants that do not bind 14-3-3 are inactive in hypoxia signaling to mTORC1. TSC2, but not TSC1, associates with 14-3-3 in vivo.  
 Controversy about whether Akt/PKB phosphorylation leads to 14-3-3 binding. Sites marked are based on available information, but not 100% certain.  
**References to 14-3-3 binding to TSC2**  
 Hengstschläger M, Rosner M, Fountoulakis M, Lubec G. Tuberous sclerosis genes regulate cellular 14-3-3 protein levels. *Biochem Biophys Res Commun.* 2003 Dec 19;312(3)  
 Li Y, Regulation of TSC2 by 14-3-3 binding. *J Biol Chem.* 2002 Nov 22;277(47):44593-6  
 Nellist M, Goedbloed MA, Halley DJ. Regulation of tuberous sclerosis complex (TSC) function by 14-3-3 proteins. *Biochem Soc Trans.* 2003 Jun;31(Pt 3):587-91.  
 Li Y, Inoki K, Vacratsis P, Guan KL. The p38 and MK2 kinase cascade phosphorylates tuberin, the tuberous sclerosis 2 gene product, and enhances its interaction with 14-3-3. *J Biol Chem.* 2003 Apr 18;278(16):13663-71.  
 Shumway SD, Li Y, Xiong Y. 14-3-3beta binds to and negatively regulates the tuberous sclerosis complex 2 (TSC2) tumor suppressor gene product, tuberin. *J Biol Chem.* 2003 Jan 24;278(4):2089-92.  
 Li Y, Inoki K, Yeung R, Guan KL. Regulation of TSC2 by 14-3-3 binding. *J Biol Chem.* 2002 Nov 22;277(47):44593-6.  
 Nellist M, Goedbloed MA, de Winter C, Verhaaf B, Jankie A, Reuser AJ, van den Ouweland AM, van der Sluijs P, Halley DJ. Identification and characterization of the interaction between tuberin and 14-3-3zeta. *J Biol Chem.* 2002 Oct 18;277(42):39417-24.  
 Liu MY, Cai S, Espejo A, Bedford MT, Walker CL. 14-3-3 interacts with the tumor suppressor tuberin at Akt phosphorylation site(s). *Cancer Res.* 2002 Nov 15;62(22):6475-80.  
 Mancini M, Petta S, Martinelli G, Barbieri E, Santucci MA. RAD 001 (everolimus) prevents mTOR and Akt late re-activation in response to imatinib in chronic myeloid leukemia. *J Cell Biochem.* [Epub ahead of print]

**Human USP8** Deubiquitinating enzyme (Swissprot = P40818)

1 MPAVASVPKE LYLSSSLKDL NKKTEVKPEK ISTKSYVHSA LKIFKTAEEC RDRDEERAY  
 61 VLYMKYVTVY NLIKKRPDFK QQQDYFHSIL GPGNIKKAVE EAERLSESLK LRYEEAEVRK  
 121 KLEEKDRQEE AQLQQRQE TGREDDGTLA KGSLENVLDS KDKTQKSNGE KNEKCEKTEK  
 181 GAITAKELYT MMTDKNISLI IMDARRMQDY QDSCILHSLV VPEEAI SPGV LFKWESKT  
 241 DDSKDTWKKR GNVEYVLLD WFSKADLQI GTTLRSLKDA LFKWESKTVL RNEPLVLEGG  
 301 YENWLLCYPQ YTTNAKVTPP PRRQNEEVSI SLDFTYPSLE ESIPSPKAAQ TPPASIEVDE  
 361 NIELISGQNE RMGPNLSTP VEPVAASKSD VSPIIQPVPS IKNVQIDRT KPAVKLPPEE  
 421 HRIKSESTNH EQQSPQSGKV IPDRSTKPVV FSPPTLMLTDE EKARIHAETA LLMEKNKQEK  
 481 ELRERQEEQ KEKLRKEEQE QKAKKQEA ENEITEKQK AKEEMKKES EQAKKEDKET  
 541 SAKRGKEITG VKRQSKSEHE TSDAKKSVED RGRKRCPTPEI QKKSTGVDVPH TSVTGDSSGG  
 601 KPFIKIQQPE SGILRTGTFR EDTDDTERNK AQREPLTRAR SEEMGRIVPG LPSGWAKFLD  
 661 PITGTFRYYH SPTNTVHMYP PEMAPSSAPP STPPTHKAKP QIPAERDREP SKLKRYS  
 721 DITQAIQEEE KRKPTVTPTV NRENKPTCYP KAEISRLSAS QIRNLNPVFG GSGPALTGLR  
 781 NLGNTCYMNLS ILQCLCNAPH LADYFNRCY QDDINRSNLL GHKGEVAEEF GIIMKALWTG  
 841 QYRYISPKDF KITIGKINDQ FAGYSQQDSQ ELLFLMDGL HEDLNKADNR KRYKEENNDH  
 901 LDDFKAAEAH WQHKQLNES IIVALFQGF KSTVQCLTCH KRSRTFEAFM YLSLPLASTS  
 961 KCTLQDCLRL FSKEEKLTDN NRYFCSHCR RRDLSKKIEI WKLPPVLLVH LKRFSYDGRW  
 1021 KQKLTQSVDF PLENLDSQY VIGPKNNLKK YNLFVSNHY GGLDGGHYTA YCKNAARQRW  
 1081 FKFDDEHVS ISVSSVKSSA AYILFYTSLG PRVTDVAT  
 >gi|731046|sp|P40818.1|UBP8\_HUMAN RecName: Full=Ubiquitin carboxyl-terminal hydrolase 8; AltName: Full=Ubiquitin thioesterase 8; AltName: Full=Ubiquitin-specific-processing protease 8; AltName: Full=Deubiquitinating enzyme 8; Short=hUBPy  
 MPAVASVPKELYLSSSLKDLNKKTEVKPEKISTKSYVHSALKIFKTAEECLDRDEERAYVLYMKYVTVY  
 NLIKKRPDFKQQQDYFHSILGPGNIKKAVEEAERLSESLKLRYYEEAEVRKLEEKDRQEEAQLQQRQE  
 TGREDDGTLAKGSLENVLDSKDKTQKSNGEKNEKCEKTEKGAITAKELYTMMTDKNISLIIMDARRMQDY  
 QDSCILHSLVPEEAI SPGV TASWIEAHL PDSDKDTWKKRGNVEYVLLDWFSSKADLQIGTTLRSLKDA  
 LFKWESKTVL RNEPLVLEGGYVLLCYPQYTTNAKVTPPPRRQNEEVSI SLDFTYPSLEESIPSPKAAQ  
 TPPASIEVDENIELISGQNERMGPNLSTPVEPVAASKSDVSPIIQPVPSIKNVQIDRTKPAVKLPPEE  
 HRIKSESTNH EQQSPQSGKVI PDRSTKPVV FSPPTLMLTDEEKARIHAETALLMEKNKQEKELRERQEEQ  
 KEKLRKEEQE QKAKKQEA ENEITEKQK AKEEMKKES EQAKKEDKET SAKRGKEITG VKRQSKSEHE

|                                                                                                                                                                                                                                                                                                                                                                                                                                                                                                                                                                                                                                                                                                                                                                                                                                                                                                                                                                                                                                                                                                                                                                                                                                                                                                                                                                                                                                                                                                                                                                                                                                                                                                                                                                                                                                                                                                                                                                                                                                                                                                                                                                                                                                                                                                                                                                                                                                                                                                                                                                                                                                                                                                                                                                                                                                                                                                                                                                                                                                                                                                                                                                                                                                                                          |  |
|--------------------------------------------------------------------------------------------------------------------------------------------------------------------------------------------------------------------------------------------------------------------------------------------------------------------------------------------------------------------------------------------------------------------------------------------------------------------------------------------------------------------------------------------------------------------------------------------------------------------------------------------------------------------------------------------------------------------------------------------------------------------------------------------------------------------------------------------------------------------------------------------------------------------------------------------------------------------------------------------------------------------------------------------------------------------------------------------------------------------------------------------------------------------------------------------------------------------------------------------------------------------------------------------------------------------------------------------------------------------------------------------------------------------------------------------------------------------------------------------------------------------------------------------------------------------------------------------------------------------------------------------------------------------------------------------------------------------------------------------------------------------------------------------------------------------------------------------------------------------------------------------------------------------------------------------------------------------------------------------------------------------------------------------------------------------------------------------------------------------------------------------------------------------------------------------------------------------------------------------------------------------------------------------------------------------------------------------------------------------------------------------------------------------------------------------------------------------------------------------------------------------------------------------------------------------------------------------------------------------------------------------------------------------------------------------------------------------------------------------------------------------------------------------------------------------------------------------------------------------------------------------------------------------------------------------------------------------------------------------------------------------------------------------------------------------------------------------------------------------------------------------------------------------------------------------------------------------------------------------------------------------------|--|
| <p>TSDAKKSVEDRGKRCPTPEIQKCKSTGDPVPHSTVTDGSDGSGKPFKIKGQPESGILRTGTFREDTDDTERNK<br/> AQRPLTRARSEEMGRIVPGLPSGWAKFLDPITGTFRYHYSPTNTVHMYPPEMAPSSAPPSTPPTHKAKP<br/> QIPAEIRDREPSKLRYSYSSPDITQAIQEHEKRRKPTVTPVNRNENKPTCYPKAEISRLSASQIRNLPVFG<br/> GSGPALTGLRNLGNTCYMNSILQCLCNAPHLADYFNRCYQDDINRSNLLGHKGEVAEEFGIIMKALWTG<br/> QYRYISPKDFKITIGKINDQFAGYSQQDSQELLLFLMDGLHEDLNKADNRKRYKEENNDHLLDDFKAAEHA<br/> WQKHKQLNESIIVALFQGGFKSTVQCLTCHKKSRTFEAFMYLSLPLASTSCTLODCLRLFSKKEKLTDN<br/> NRFYCSHCRRARDSLKKIETWKLPPVLLVHLKRFSDYDGRWKQLQTSVDFPLENLDLSQYVIGPKNNLKK<br/> YNLFSVSNHYGGLDGGHYTAYCKNAARQRWFKFDDHEVSDISVSSVKSSAAYILFYTSLGPRVTDVAT</p> <p><b>Notes</b><br/> USP8 (=UBPY) The 14-3-3 binding of UBPY was inhibited by mutating the consensus 14-3-3-binding motif<br/> RSYS(680)SP, by phosphatase treatment, and by competition with the Ser(680)-phosphorylated RSYS(680)SP<br/> peptide. Metabolic labeling with [(32)P]orthophosphate and immunoblotting using antibody against the<br/> phosphorylated 14-3-3-binding motif showed that Ser(680) is a major phosphorylation site in UBPY. Ser680 in<br/> the form of USP8 studied by Mizuno et al (2007) = Ser718 in P40818.</p> <p><b>References to 14-3-3 binding to USP8</b><br/> Mizuno E, Kitamura N, Komada M. 14-3-3-dependent inhibition of the deubiquitinating activity of UBPY and<br/> its cancellation in the M phase. <i>Exp Cell Res.</i> 2007 Oct 1;313(16):3624-34.</p>                                                                                                                                                                                                                                                                                                                                                                                                                                                                                                                                                                                                                                                                                                                                                                                                                                                                                                                                                                                                                                                                                                                                                                                                                                                                                                                                                                                                                                                                                                                                                                                                                                                                                                                                                                                                                                  |  |
| <p><b>Human WWTR1 (TAZ)</b> WW domain-containing transcription regulator protein 1 functions as a transcriptional<br/> coactivator (Q9GZV5)</p> <p>1 MNPASAPPPPL PPGGQQVIHV TQDLDTDLA LFNSVMNPKP SSWRKKILPE SFFKEPDSGS<br/> 61 HSRQSTSDSS GGHPGRLAG GAQHVRSHS PASLQLGTGA GAAGSPAQQH AHLRQOSYDV<br/> 121 TDELPLPPGW EMTFTATGQR YFLNHIIEKIT TWQDPRKAMN QPLNHNMLHP AVSSTPVPQR<br/> 181 SMAVSQPNLV MNHQHQQMA PSTLSQQNHP TQNPPAGLMS MPNALTQQQ QQQKLRQLRI<br/> 241 QMERERIRMR QEELMRQEAALCRQLPMEAE TLAPVQAAVN PPTMTPDMRS ITNNSDPFL<br/> 301 NGGPYHSREQ STDSGLGLGC YSVPTTPEDE LSNVDEMDTG ENAGQTPMNI NPQOTRFPDF<br/> 361 LDCLPGTNVD LGTLESEDLI PLFNDVESAL NKSEPFLLTWL</p> <p>&gt;gi 67462080 sp Q9GZV5.1 WWTR1_HUMAN RecName: Full=WW domain-containing<br/> transcription regulator protein 1; AltName: Full=Transcriptional coactivator<br/> with PDZ-binding motif</p> <p>MNPASAPPPPLPPGGQQVIHV TQDLDTDLA LFNSVMNPKP SSWRKKILPE SFFKEPDSGS HSRQSTSDSS<br/> GGHPGRLAGGAQHVRSHS PASLQLGTGAGAAGSPAQQHAHLRQOSYDVTDELPLPPGWEMTFTATGQR<br/> YFLNHIIEKIT TWQDPRKAMN QPLNHNMLHP AVSSTPVPQR SMAVSQPNLV MNHQHQQMA PSTLSQQNHP<br/> TQNPPAGLMS MPNALTQQQ QQQKLRQLRI QMERERIRMR QEELMRQEAALCRQLPMEAE TLAPVQAAVN<br/> PPTMTPDMRS ITNNSDPFLNGGPYHSREQ STDSGLGLGC YSVPTTPEDE LSNVDEMDTG ENAGQTPMNI<br/> NPQOTRFPDFLDCLPGTNVD LGTLESEDLI PLFNDVESAL NKSEPFLLTWL</p> <p><b>Notes</b><br/> This protein is related to YAP1 (YAP65). TAZ plays a role in the migration, invasion, and tumorigenesis of breast<br/> cancer cells and thus presents a novel target for the detection and treatment of breast cancer. 14-3-3 binding<br/> requires TAZ phosphorylation on a single serine residue (Ser89), resulting in the inhibition of TAZ transcriptional<br/> co-activation through 14-3-3-mediated nuclear export. TAZ may link events at the plasma membrane and<br/> cytoskeleton to nuclear transcription in a manner that can be regulated by 14-3-3.</p> <p><b>References to 14-3-3 binding to WWTR1 (TAZ)</b><br/> Kanai F, Marignani PA, Sarbassova D, Yagi R, Hall RA, Donowitz M, Hisaminato A, Fujiwara T, Ito Y, Cantley<br/> LC, Yaffe MB. TAZ: a novel transcriptional co-activator regulated by interactions with 14-3-3 and PDZ domain<br/> proteins. <i>EMBO J.</i> 2000 Dec 15;19(24):6778-91<br/> Chan SW, Lim CJ, Guo K, Ng CP, Lee I, Hunziker W, Zeng Q, Hong W. A role for TAZ in migration, invasion,<br/> and tumorigenesis of breast cancer cells. <i>Cancer Res.</i> 2008 Apr 15;68(8):2592-8<br/> Wang K, Degerny C, Xu M, Yang XJ. YAP, TAZ, and Yorkie: a conserved family of signal-responsive<br/> transcriptional coregulators in animal development and human disease. <i>Biochem Cell Biol.</i> 2009 Feb;87(1):77-91.<br/> Lei QY, Zhang H, Zhao B, Zha ZY, Bai F, Pei XH, Zhao S, Xiong Y, Guan KL. TAZ promotes cell proliferation<br/> and epithelial-mesenchymal transition and is inhibited by the hippo pathway. <i>Mol Cell Biol.</i> 2008 Apr;28(7):2426-<br/> 36.<br/> Hong JH, Hwang ES, McManus MT, Amsterdam A, Tian Y, Kalmukova R, Mueller E, Benjamin T, Spiegelman<br/> BM, Sharp PA, Hopkins N, Yaffe MB. TAZ, a transcriptional modulator of mesenchymal stem cell differentiation.<br/> <i>Science.</i> 2005 Aug 12;309(5737):1074-8.</p> |  |
| <p><b>Human YAP1 (YAP65)</b> Co-activator for TEAD/TEF transcription factors (Swissprot = P46937)</p> <p>1 MDPGQQPPPPQ PAPQGGQPP SPPQGGQPP SGPGQPAPAA TQAAPQAPPA GHQIVHVRGD<br/> 61 SETDLEALFN AVMNPKTANV PQTVPMLRKL LPDSFFKPEE PKSHSRQAST DAGTAGALTP<br/> 121 QHVRHAHSSPA SLQLGAVSPG TLTPTGVVSG PAATPTAQLH RQSSFEIPDD VPLPAGWEMA<br/> 181 KTSSGQRYFL NHIDQTTTWQ DPRKAMLSQM NVTAPTSPPV QQNMMNSASA MNQRISQSA<br/> 241 VKQPPPLAPQ SPQGGVMGGS NSNQQQMRL QQLQMEKERL RLKQQLLRQ VRPQELALRS<br/> 301 QLPTLEQDGG TQNPVSSPGM SDELRTMTTN SSDPFLNSGT YHSRDESTDS GLSMSSYSVP<br/> 361 RTPDDFLNSV DEMDTGDTIN QSTLPSQQNR FPDYLEAIPG TNVDLGTLEG DGMNIEGEEEL<br/> 421 MPSLQEALSS DILNDMESVL AATKLDKESF LTWL</p> <p>&gt;gi 1175423 sp P46937.1 YAP1_HUMAN RecName: Full=65 kDa Yes-associated<br/> protein; AltName: Full=YAP65</p> <p>MDPGQQPPPPQ PAPQGGQPP SPPQGGQPP SGPGQPAPAA TQAAPQAPPA GHQIVHVRGD SETDLEALFN<br/> AVMNPKTANV PQTVPMLRKL LPDSFFKPEE PKSHSRQAST DAGTAGALTP QHVRHAHSS PASLQLGAVSPG<br/> TLTPTGVVSG PAATPTAQLH RQSSFEIPDD VPLPAGWEMAKTSSGQRYFLNHIDQTTTWQ DPRKAMLSQM<br/> NVTAPTSPPV QQNMMNSASA MNQRISQSA PVKQPPPLAPQ SPQGGVMGGS NSNQQQMRL QQLQMEKERL<br/> RLKQQLLRQ VRPQELALRS QLPTLEQDGG TQNPVSSPGMSQELRTMTTN SSDPFLNSGT YHSRDESTDS<br/> GLSMSSYSVP RTPDDFLNSV DEMDTGDTIN QSTLPSQQNR FPDYLEAIPG TNVDLGTLEG DGMNIEGEEEL<br/> MPSLQEALSS DILNDMESVLAATKLDKESF LTWL</p> <p><b>Notes</b><br/> While PKB has been reported to phosphorylate the 14-3-3-binding site at Ser127 (Basu et al 2003), this HxRxx(pS)<br/> site does not conform to the PKB consensus, and more recent data indicate that this site is phosphorylated by</p>                                                                                                                                                                                                                                                                                                                                                                                                                                                                                                                                                                                                                                                                                                                                                                                                                                                                                                                                                                                                                                                                                                                                                                                                                                                                                                                                                                                                                                                                                                                                                                                                                                       |  |

|                                                                                                                                                                                                                                                                                                                                                                                                                                                                                                                                                                                                                                                                                                                                                                                                                                                                                                                                                                                                                                                                                                                                                                                                                                                                                                                                                                                                                                                                                                                                                                                                                                                                                                                                                                                                                                                                                                                                                                                                                                                                                                                                                                                                                                                                                                                                                                                                                                                                                                                                                                                                      |  |
|------------------------------------------------------------------------------------------------------------------------------------------------------------------------------------------------------------------------------------------------------------------------------------------------------------------------------------------------------------------------------------------------------------------------------------------------------------------------------------------------------------------------------------------------------------------------------------------------------------------------------------------------------------------------------------------------------------------------------------------------------------------------------------------------------------------------------------------------------------------------------------------------------------------------------------------------------------------------------------------------------------------------------------------------------------------------------------------------------------------------------------------------------------------------------------------------------------------------------------------------------------------------------------------------------------------------------------------------------------------------------------------------------------------------------------------------------------------------------------------------------------------------------------------------------------------------------------------------------------------------------------------------------------------------------------------------------------------------------------------------------------------------------------------------------------------------------------------------------------------------------------------------------------------------------------------------------------------------------------------------------------------------------------------------------------------------------------------------------------------------------------------------------------------------------------------------------------------------------------------------------------------------------------------------------------------------------------------------------------------------------------------------------------------------------------------------------------------------------------------------------------------------------------------------------------------------------------------------------|--|
| <p>LATS kinases (Zhao et al 2007, Hao et al 2008, Lee et al 2008).</p> <p><b>References to 14-3-3 binding to human YAP65 and Drosophila Yorkie</b></p> <p>Vassilev A, Kaneko KJ, Shu H, Zhao Y, DePamphilis ML. TEAD/TEF transcription factors utilize the activation domain of YAP65, a Src/Yes-associated protein localized in the cytoplasm. <i>Genes Dev.</i> 2001 May 15;15(10):1229-41.</p> <p>Badouel C, Gardano L, Amin N, Garg A, Rosenfeld R, Le Bihan T, McNeill H. The FERM-domain protein Expanded regulates Hippo pathway activity via direct interactions with the transcriptional activator Yorkie. <i>Dev Cell.</i> 2009 Mar;16(3):411-20.</p> <p>Wang K, Degerny C, Xu M, Yang XJ. YAP, TAZ, and Yorkie: a conserved family of signal-responsive transcriptional coregulators in animal development and human disease. <i>Biochem Cell Biol.</i> 2009 Feb;87(1):77-91.</p> <p>Zhao B, Wei X, Li W, Udan RS, Yang Q, Kim J, Xie J, Ikenoue T, Yu J, Li L, Zheng P, Ye K, Chinnaiyan A, Halder G, Lai ZC, Guan KL. Inactivation of YAP oncoprotein by the Hippo pathway is involved in cell contact inhibition and tissue growth control. <i>Genes Dev.</i> 2007 Nov 1;21(21):2747-61.</p> <p>Basu S, Totty NF, Irwin MS, Sudol M, Downward J. Akt phosphorylates the Yes-associated protein, YAP, to induce interaction with 14-3-3 and attenuation of p73-mediated apoptosis. <i>Mol Cell.</i> 2003 Jan;11(1):11-23.</p> <p>Vassilev A, Kaneko KJ, Shu H, Zhao Y, DePamphilis ML. TEAD/TEF transcription factors utilize the activation domain of YAP65, a Src/Yes-associated protein localized in the cytoplasm. <i>Genes Dev.</i> 2001 May 15;15(10):1229-41.</p> <p>Kanai F, Marignani PA, Sarbassova D, Yagi R, Hall RA, Donowitz M, Hisaminato A, Fujiwara T, Ito Y, Cantley LC, Yaffe MB. TAZ: a novel transcriptional co-activator regulated by interactions with 14-3-3 and PDZ domain proteins. <i>EMBO J.</i> 2000 Dec 15;19(24):6778-91.</p> <p>Zhao B, Li L, Tumaneng K, Wang CY, Guan KL. A coordinated phosphorylation by Lats and CK1 regulates YAP stability through SCF(beta-TRCP). <i>Genes Dev.</i> 2010 Jan 1;24(1):72-85.</p>                                                                                                                                                                                                                                                                                                                                                                                                                                 |  |
| <p><b>Human ZBTB17</b> (Miz1) Zinc finger &amp; BTB domain-containing protein 17 (Myc-interacting zinc finger protein) (Swissprot = Q13105)</p> <pre> 1 MDFPQHSQHV LEQLNQQRQL GLLCCTFVVD DGVHFKAHKA VLAACSEYFK MLFVDQKDVV 61 HLDISNAAGL GQVLEFMYTA KLSLSPENVD DVLAVATFLQ MQDIITACHA LKSLAEPATS 121 PGGNAEALAT EGGDKRAKEE KVATSTLSRL EQAGRSTPIG PSRDLKEERG GQAQSAASGA 181 EQTEKADAPR EPPPVELKPD PTSGMAAAEA EAALSESSEQ EMEVEPARKG EEEQKEQEEQ 241 EEEGAGPAEV KEEGSQLENG EAPEENENEE SAGTDSGQEL GSEARGLRSG YGDRTESKA 301 YGSVIHKCED CGKEFTHTGN FKRHIRIHTG EKPFSCRECS KAFSDPAACK AHEKTHSPLK 361 PYGCEECGKS YRLISLLNLH KKRHSGEARY RCEDCGKLF TSGNLKRHQL VHSGEKPYQC 421 DYCGRSFDPT TSKMRHLETH DTKEHKCPH CDKFNQVGN LKAHLKIHA DGPLKCRECG 481 KQFTTSGNLK RHLRIHSGEK PYVCIHCQRQ FADPGALQRH VRIHTGEKPC QCVMCCKAFT 541 QPSSLIAHVR QHTGEKPYVC ERGKRFVQS SQLANHIRRH DNIRPHKCSV CSAFVNVGD 601 LSKHIIHTG EKPYLCKDCG RGFNRVDNLR SHVKTVMHQQK AGIKILEPEE GSEVSVTVVD 661 DMVTLATEAL AATAVTQLTV VPVGAAVTAD ETEVLKAEIS KAVKQVQEEED PNTHILYACD 721 SCGDKFLDAN SLAQHVRIHT AQALVMFQTD ADFYQYGGPG GTWPAGQVLQ AGELVFRPRD 781 GAEGQFALAE TSPTAPECPP PAE </pre> <p>&gt;gi 62906906 sp Q13105.3 ZBT17_HUMAN RecName: Full=Zinc finger and BTB domain-containing protein 17; AltName: Full=Zinc finger protein 60; AltName: Full=Zinc finger protein 151; AltName: Full=Myc-interacting zinc finger protein; AltName: Full=Miz-1</p> <p>MDFPQHSQHVLEQLNQQRQLGLLCCTFVVDGVHFKAHKAVLAACSEYFKMLFVDQKDVVHLDISNAAGL GQVLEFMYTAKLSLSPENVDVAVATFLQMQDIITACHALKSLAEPATSPGGNAEALATEGGDKRAKEE KVATSTLSRLREQAGRSTPIGPSRDLKEERGGQAQSAASGAEQTEKADAPREPPPVELKPDPTSGMAAAEA EAALSESSEQEMEVEPARKGEEQKEQEEQEEGAGPAEVKKEEGSQLENGEAPEENENEEESAGTDSGQEL GSEARGLRSGYGDRTESKAYGSVIHKCEDCGKEFTHTGNFKRHIRIHTGKPFSCRECSKAFSDPAACK AHEKTHSPLKPYGCEECGKS YRLISLLNLHKKRHSGEARYRCEDCGKLF TSGNLKRHQLVHSGEKPYQC DYCGRSFDPTSKMRHLETHDTKEHKCPHCDKFNQVGNLKAHLKIHAIDGPLKCRECGKQFTTSGNLK RHLRIHSGEKPYVCIHCQRQFADPGALQRHVRIHTGEKPCQCVMCCKAFTQASSLIAHVRQHTGEKPYVC ERGKRFVQSSQLANHIRHDNIRPHKCSVCSKAFVNVGDLKSHIIHTGKPYLCKDCRGRFNVDNLR SHVKTVMHQQKAGIKILEPEEGSEVSVTVDDMVTLATEAL AATAVTQLTVVPVGAAVTADETEVLKAEIS KAVKQVQEEEDPNTHILYACDSCGDKFLDANSLAQHVRIHTAQALVMFQTDADFYQYGGPGGTWPAGQVLQ AGELVFRPRDGAEGQFALAE TSPTAPECPPPAE</p> <p><b>Notes</b><br/>RSGpT<sup>291</sup>YG, CGRSFpS<sup>428</sup>DP</p> <p><b>References to 14-3-3 binding to Miz1</b></p> <p>Wanzel M, Kleine-Kohlbrecher D, Herold S, Hock A, Berns K, Park J, Hemmings B, Eilers M. Akt and 14-3-3eta regulate Miz1 to control cell-cycle arrest after DNA damage. <i>Nat Cell Biol.</i> 2005 Jan;7(1):30-41.</p> |  |
| <p><b>Human ZFP36L1</b> BRF1 (butyrate response factor 1; EGF-response factor) (Swissprot = Q07352)</p> <pre> 1 MTTTLVSATI FDLSEVLCKG NKMLNYSAPS AGGCLLDRKA VGTGAGGGFP RRHSVTLPS 61 KFHQNQLLSS LKGEFAPALS SRDSRFRDRS FSEGGERLLP TQKQPGGGQV NSSRYKTELC 121 RPFEEENGACK YGDKCQFAHG IHELRLSLTRH PKYKTELCRT FHTIGFCPYG PRCHFHNAE 181 ERRALAGARD LSADRRLQHS SF5FAGFPESA AATAAATGLL DSPTSITPPP ILSADDLLGS 241 PTLPDGTNNP FAFSSQELAS LFAPSMGLPG GGSPTTFLFR PMSSEPHMFD SPPSPQDLSL 301 DQEGYLSSSS SSSHSGSDSPT LDNSRRLPIF SRLSISDD </pre> <p>&gt;gi 1351254 sp Q07352.1 TISB_HUMAN RecName: Full=Butyrate response factor 1; AltName: Full=Protein TIS11B; AltName: Full=EGF-response factor 1; Short=ERF-1</p> <p>MTTTLVSATIFDLSEVLCKGNKMLNYSAPSAGGCLLDRKAVGTGAGGGFRRHSVTLPSKFKHQNQLLSS LKGEFAPALSSRDSRFRDRSFSEGGERLLPTQKQPGGGQVNSSRYKTELCRPFEEENGACKYGDKQCFAHG IHELRLSLTRHPKYKTELCRTFHTIGFCPYGPRCHFHNAEERRALAGARDLSADRRLQHSFSFAGFPESA AATAAATGLLDSPTSITPPPILSADDLLGSPTLPDGTNNPFAFSSQELASLFAPSMGLPGGGSPTTFLFR PMSSEPHMFDSPSPQDLSLDQEGYLSSSSSSHSGSDSPTLDNSRRLPIFSRLSISDD</p>                                                                                                                                                                                                                                                                                                                                                                                                                                                                                                                                                                                                                                                                                                                                                                                                                                                                                                                                                                                                                                                                                                                                                                                                                                                                                                                                                                                                                                                                                                                                   |  |

|                                                                                                                                                                                                                                                                                                                                                                                                                                                                                                                                                                                                                                                                                                                                                                                                                                                                                                                                                                                                                                                                                                                                                                                                                                                                                                                                                                                                                                                                                                                                                                                                                                                                                                                                                                                                                                                                                                                                                                                                                                                                                                                                                                                                                                                                                                                                                                                                                                                                                                                                                                                                                                                                                                                                                                                                                                                                                                                                                                                                                                                                                                                                                                                                                           |  |
|---------------------------------------------------------------------------------------------------------------------------------------------------------------------------------------------------------------------------------------------------------------------------------------------------------------------------------------------------------------------------------------------------------------------------------------------------------------------------------------------------------------------------------------------------------------------------------------------------------------------------------------------------------------------------------------------------------------------------------------------------------------------------------------------------------------------------------------------------------------------------------------------------------------------------------------------------------------------------------------------------------------------------------------------------------------------------------------------------------------------------------------------------------------------------------------------------------------------------------------------------------------------------------------------------------------------------------------------------------------------------------------------------------------------------------------------------------------------------------------------------------------------------------------------------------------------------------------------------------------------------------------------------------------------------------------------------------------------------------------------------------------------------------------------------------------------------------------------------------------------------------------------------------------------------------------------------------------------------------------------------------------------------------------------------------------------------------------------------------------------------------------------------------------------------------------------------------------------------------------------------------------------------------------------------------------------------------------------------------------------------------------------------------------------------------------------------------------------------------------------------------------------------------------------------------------------------------------------------------------------------------------------------------------------------------------------------------------------------------------------------------------------------------------------------------------------------------------------------------------------------------------------------------------------------------------------------------------------------------------------------------------------------------------------------------------------------------------------------------------------------------------------------------------------------------------------------------------------------|--|
| <p><b>Notes</b><br/> SRDSRFRDRSF(pS92)EGGERLLP<br/> A zinc finger protein that plays an important role in the assembly of the RNA polymerase III initiation factor TFIIIB. Regulates mRNA levels by targeting transcripts containing AREs (AU-rich elements) into the decay pathway. Phosphorylation by Akt apparently generates 14-3-3 binding sites and inhibits BRF1 from promoting mRNA activity. Contains 2 C3H1-type zinc fingers. Phosphorylation by PKB at both S92 and S203. Mutation leads to complete loss of PKB regulation of BRF1 and constitutive mRNA decay. Cell compartment fractionation experiments support a model in which binding to 14-3-3 sequesters BRF1 through relocalization and prevents it from executing its mRNA decay activity, as well as from proteasomal degradation, thereby maintaining high BRF1 protein levels that are required to reinstate decay upon dissipation of the stabilizing signal.</p> <p><b>References to 14-3-3 binding to BRF1</b><br/> Schmidlin M, Lu M, Leuenberger SA, Stoecklin G, Mallaun M, Gross B, Gherzi R, Hess D, Hemmings BA, Moroni C. The ARE-dependent mRNA-destabilizing activity of BRF1 is regulated by protein kinase B. <i>EMBO J</i>. 2004 Dec 8;23(24):4760-9.<br/> Benjamin D, Schmidlin M, Min L, Gross B, Moroni C. BRF1 Protein Turnover and mRNA Decay Activity Are Regulated by Protein Kinase B at the Same Phosphorylation Sites. <i>Mol Cell Biol</i>. 2006 December; 26(24): 9497–9507</p>                                                                                                                                                                                                                                                                                                                                                                                                                                                                                                                                                                                                                                                                                                                                                                                                                                                                                                                                                                                                                                                                                                                                                                                                                                                                                                                                                                                                                                                                                                                                                                                                                                                                                                                                      |  |
| <p><b>Human ZNF395</b> (Huntington disease gene regulatory region-binding protein 2, HDBP2) (Papillomavirus-binding factor, PBF) (Swissprot = Q9H8N7)</p> <pre> 1 MASVLSRRLG KRSLLGARVL GPSASEGPSA APPSEPLLEG AAPQPFTTSD DTPCQEQPKE 61 VLKAPSTSLG QQVAFQPGQK VYVWYGGQEC TGLVEQHSWM EGQVTVWVLE QKLQVCCRVE 121 EVWLAELQGP CPQAPPLEPG AQALAYRPVS RNIDVPKRKS DAVEMDEMMA AMVLTSLSCS 181 PVVQSPPGTE ANFSASRAAC DPWKESGDIS DSGSSTTSGH WSGSSGVSTP SPPHPQASPK 241 YLGDAFGSPQ TDHGFETDDP PFLLDPEAPR KRKNSVKVMY KCLWPNCGKV LRSIVGIKRH 301 VKALHLGDTV DSDQFKREED FYYTEVQLKE ESAAAAAAAA AGTPVPGTPT SEPAPTSMPT 361 GLPLSALPPP LHKAQSSGPE HPGPESSLPS GALSKSAPGS FWHIQADHAY QALPSFQIPV 421 SPHIYTSVSW AAAPSAACSL SPVRSRSLSF SEPPQQPAPAM KSHLIVTSP RAQSGARKAR 481 GEAKKCRKVV GIEHRDQWCT ACRWKACQR FLD </pre> <p>&gt;gi 84028224 sp Q9H8N7.2 ZN395_HUMAN RecName: Full=Zinc finger protein 395; AltName: Full=Papillomavirus-binding factor; AltName: Full=Papillomavirus regulatory factor 1; Short=PRF-1; AltName: Full=Huntington disease gene regulatory region-binding protein 2; Short=HDBP-2; Short=HD gene regulatory region-binding protein 2; AltName: Full=HD-regulating factor 2; Short=HDRF-2</p> <pre> MASVLSRRLGKRSLLGARVLGPSASEGPSAAPPSEPLLEGAAPQPFTTSDDTPCQEQPKEVLKAPSTSLG QQVAFQPGQKVVYVWYGGQECTGLVEQHSWMEGQVTVWVLEQKLQVCCRVEVWLAELQGGPCPQAPPLEPG AQALAYRPVSRNIDVPKRKSDAVEMDEMMAAMVLTSLSCSPVVQSPPGTEANFSASRAACDPWKESGDIS DSGSSTTSGHWSSSGVSTPSPPHQASPKYLGDAFGSPQTDHGFETDDPFLLDPEAPRKRKNSVKVMY KCLWPNCGKVLRSIVGIKRHVKALHLGDTVDSQFKREEDFYYTEVQLKEESAAAAAAAAAGTPVPGTPT SEPAPTSMPTGLPLSALPPP LHKAQSSGPEHPGPESSLPSGALSKSAPGSFWHIQADHAYQALPSFQIPV SPHIYTSVSWAAAPSAACSLSPVRSRSLSFSEPPQQPAPAMKSHLIVTSPRAQSGARKARGEAKKCRKVV GIEHRDQWCTACRWKACQRFLD </pre> <p><b>Notes</b><br/> Inspection of the PBF amino acid sequence revealed two motifs from amino acids 444 to 453 (the sequence RSRSLFSEPE), and from amino acids 393 to 398 (the sequence LSKSAP), that resembled “mode I”, although neither motif was perfect. Individual mutation of the potential binding serine at position 396 to alanine (S396A; PBFmt4) or the serine at position –2 to the potential binding serine (S394A; PBFmt5) did not significantly affect the ability of this protein to interact with HA-14-3-β. However, simultaneous mutation of both residues in PBF-S394/396A (PBFmt4/5) resulted in a clear reduction in the association with over-expressed HA-14-3-β. Thus, this binding motif relied on the presence of one of the two phosphoserines for its activity. While the site at S394/396 mediates high-affinity binding, the site at S447/449/451 appears to act as a low-affinity motif.</p> <p><b>References to 14-3-3-binding to Zinc finger protein 395</b><br/> Sichtig N, Silling S, Steger G. Papillomavirus binding factor (PBF)-mediated inhibition of cell growth is regulated by 14-3-3beta. <i>Arch Biochem Biophys</i>. 2007 Aug 1;464(1):90-9.<br/> Tanaka K, Shouguchi-Miyata J, Miyamoto N, Ikeda JE. Novel nuclear shuttle proteins, HDBP1 and HDBP2, bind to neuronal cell-specific cis-regulatory element in the promoter for the human Huntington's disease gene. <i>J Biol Chem</i>. 2004 Feb 20;279(8):7275-86.</p> |  |
| <p><b>Human ZNRF2</b> E3 ubiquitin ligase (Swissprot = Q8NHG8)</p> <pre> 1 MGAKQSGPAA ANGRTRAYSG SDLPSSSSGG ANGTAGGGGG ARAAAAAGRFP AQVPSAHQPS 61 ASGGAAAAAA APAAPAAPRS RSLGGAVGSV ASGARAAQSP FSIIPNSSSGP YGSQDSVHSS 121 PEDGGGGRDR PVGGSPGGPR LVIGSLPAHL SPHMFGGFKC PVCSKFVSSD EMDLHLVMCL 181 TKPRITYNED VLSKDAGECA ICLEELQQGD TIARLPCLCI YHKGCIDEWF EVNRSCPEHP 241 SD </pre> <p>&gt;gi 74762595 sp Q8NHG8.1 ZNRF2_HUMAN RecName: Full=E3 ubiquitin-protein ligase ZNRF2; AltName: Full=Zinc/RING finger protein 2; AltName: Full=RING finger protein 202; AltName: Full=Protein Ells2</p> <pre> MGAKQSGPAAANGRTRAYSGSDLPSSSSGGANGTAGGGGARAAAAGRFP AQVPSAHQPSASGGAAAAAA APAAPAAPRSRSLGGAVGSVASGARAAQSPFSIPNSSSGPYGSQDSVHSSPEDGGGGRDRPVGGSPGGPR LVIGSLPAHLSPHMFGGFKCPVCSKFVSSDEMDDLHLVMCLTKPRITYNEDVLSKDAGECAICLEELQQGD TIARLPCLCIYHKGCIDEWFEVNRSCPEHPSD </pre> <p><b>Notes</b><br/> MAGE domain = Ala41 to Ser120<br/> Zn finger = Cys160 to Cys179<br/> RING finger = Cys199 to Pro240<br/> 14-3-3 binding site = pSer19 + one other unknown site</p> <p><b>References to 14-3-3 binding to ZNRF2</b><br/> Dubois F, Vandermoere F, Genez A, Murphy J, Toth R, Chen S, Geraghty KM, Morrice NA and MacKintosh C</p>                                                                                                                                                                                                                                                                                                                                                                                                                                                                                                                                                                                                                                                                                                                                                                                                                                                                                                                                                                                                                                                                                                                                                                                                                                                                                                                                                                                                                                                                                                                                                                                                                                                                                                                                                                                                                                                                                                                                                                                                      |  |

|                                                                                                                                                                                                                                                                                                                                                                                                                                                                                                                                                                                                                                                                                                                                                                                                                                                                                                                                                                                                                                                                                                                                                                                                                                                                                                                                                                                                                                                                                                                                                                                                                                                                                                                                                                                                                                                                                                                                                                                                                                                                                                                                                                                                                                                                                                                                                                                                                                                                                                                                                                                                                                                                                                                          |                                                                        |
|--------------------------------------------------------------------------------------------------------------------------------------------------------------------------------------------------------------------------------------------------------------------------------------------------------------------------------------------------------------------------------------------------------------------------------------------------------------------------------------------------------------------------------------------------------------------------------------------------------------------------------------------------------------------------------------------------------------------------------------------------------------------------------------------------------------------------------------------------------------------------------------------------------------------------------------------------------------------------------------------------------------------------------------------------------------------------------------------------------------------------------------------------------------------------------------------------------------------------------------------------------------------------------------------------------------------------------------------------------------------------------------------------------------------------------------------------------------------------------------------------------------------------------------------------------------------------------------------------------------------------------------------------------------------------------------------------------------------------------------------------------------------------------------------------------------------------------------------------------------------------------------------------------------------------------------------------------------------------------------------------------------------------------------------------------------------------------------------------------------------------------------------------------------------------------------------------------------------------------------------------------------------------------------------------------------------------------------------------------------------------------------------------------------------------------------------------------------------------------------------------------------------------------------------------------------------------------------------------------------------------------------------------------------------------------------------------------------------------|------------------------------------------------------------------------|
| <p>(2009) Differential 14-3-3-affinity capture reveals new downstream targets of PI 3-kinase signaling (2009 Aug 1)</p> <p><b>Mouse AKR13b CAI52035 (mouse)</b> Ankyrin repeat domain 13b</p> <p>1 KTGILGWRSE KTEVMNGYEA KVGASNVEL ITRTRTEHLS EQHKGKVKGC KTPLQSFGLI<br/> 61 AEQHGQPQNG TLTITQTLSQA NPPAITAEY FNNFELGNR AMGRPMELTT KTQNFYPLG<br/> 121 SGGPGSRPSC GCVRSTPCPC VSRWLPSTLS WLSATHFLPS SGTSSRCACL LASQSRLKSR<br/> 181 FFTSSTPASP SGTSMAMSQ CPRCEVAPAA RR</p> <p><b>Notes</b><br/> Ankyrin repeat domain 13b CAI52035 (mouse)</p> <p><b>References to 14-3-3 binding to AKR13b</b><br/> Wanna W, Rexroad CE 3rd, Yao J. Identification of a Functional Splice Variant of 14-3-3E1 in Rainbow Trout. Mar Biotechnol (NY). 2009 Jul 10. CAI52035 (mouse)</p>                                                                                                                                                                                                                                                                                                                                                                                                                                                                                                                                                                                                                                                                                                                                                                                                                                                                                                                                                                                                                                                                                                                                                                                                                                                                                                                                                                                                                                                                                                                                                                                                                                                                                                                                                                                                                                                                                                                                                      | <p>14-3-3-binding sites not defined, therefore NO WEBLOGO ANALYSIS</p> |
| <p><b>Mouse CCT-alpha</b> Phosphorylcholine transferase A (Swissprot = P49586)</p> <p>1 MDAQSSAKVN SRKRRKEAPG PNGATEEDGI PSKVQRCAVG LRQPAPFSDE IEVDFSKPYV<br/> 61 RVTMEEACRG TPCERPVRVY ADGIFDLFHS GHARALMQAK NLFNPNTYLIV GVCSDELTHN<br/> 121 FKGFTVMNEN ERYDAVQHCER YVDEVVRNAP WTLTPEFLAE HRIDFVAHDD IPYSSAGSDD<br/> 181 VYKHIKDAGM FAPTQRTEGI STSDIITRIV RDYDVYARRN LQRGYTAKEL NVSFINEKKY<br/> 241 HLQERVDKVK KVKVDVEEKS KEFVQKVEEK SIDLIQKWE KSRREFIGSFL EMFGPEGALK<br/> 301 HMLKEGKGRM LQAISPKQSP SSSPHERSP SPSFRWPFSG KTSPPSSPAS LSRCAVTC<br/> 361 ISEDEED</p> <p><b>Notes</b><br/> In addition to Ser288 (in yellow), a second 14-3-3-binding site is proposed to exist within residues 32 to 343. 14-3-3 binding to CCT-alpha in response to Ca<sup>2+</sup> signals is associated with nuclear import of the enzyme.</p> <p><b>References to 14-3-3 binding to CCT-alpha</b><br/> Agassandian M, Chen BB, Schuster CC, Houtman JC, Mallampalli RK. 14-3-3{zeta} escorts CCT{alpha} for calcium-activated nuclear import in lung epithelia. FASEB J. [Epub ahead of print]</p>                                                                                                                                                                                                                                                                                                                                                                                                                                                                                                                                                                                                                                                                                                                                                                                                                                                                                                                                                                                                                                                                                                                                                                                                                                                                                                                                                                                                                                                                                                                                                                                                                                    |                                                                        |
| <p><b>Mouse Edc3</b> mRNA Enhancer of mRNA-decapping protein 3 (Swissprot = Q8K2D3)</p> <p>1 MAMDWLGSIV SINCGLSLGV YQGRVSAVDQ VSQTISLTRP FHNGVKCLVP EVTFRAGDIT<br/> 61 ELKILEIPGP GDNQVQVDLH QTELGPSGVG YQMSISQNGT GKVVKKPASS SSAPQSIPKR<br/> 121 TDVKSQDVAI SPQQQCCKS YVDRHMESLS QSKSFRRRHN SWSSSSRHPN QATPKKSGLK<br/> 181 NGQMKNKDDE CFGDDIEELP DTDFDFEGL ALFDKAAVFE EIDTYERRSG SRSRGPNER<br/> 241 PARYRHDIEN LESEPIVYRR ITVPHSVSKE FCTDSGLVVP SVSYELHKKL LSVAEKHGLT<br/> 301 LERRLEMTGV CASQMALTL LGGPNRLNPKN VHQRPTVALL CGPHVKGAQG ISCGRHLANH<br/> 361 DVQVILFLPN FVKMLESITN ELSLFSKTQG QVSSLRDLP ASPVDLVINC LDCPENAFRL<br/> 421 DQPWYKAAVA WANQNRAPVL SIDPPVHEVE QGIDAKWSLA LGLPLPLGEH AGRVYLCDIG<br/> 481 IPQQVFQEVG INYHSPFGCK FVIPLHSA</p> <p><b>Notes</b><br/> Ser161 is phosphorylated in response to insulin.</p> <p><b>References to 14-3-3 binding to Edc3</b><br/> Larance M, Rowland AF, Hoehn K, Humphreys DT, Preiss T, Guilhaus M, James DE. Global phosphoproteomics identifies a major role for akt and 14-3-3 in regulating Edc3. Mol Cell Proteomics. 2010 Jan 5. [Epub ahead of print]</p>                                                                                                                                                                                                                                                                                                                                                                                                                                                                                                                                                                                                                                                                                                                                                                                                                                                                                                                                                                                                                                                                                                                                                                                                                                                                                                                                                                                                                                                                                                                                                                                                        |                                                                        |
| <p><b>Mouse GEM</b> (Swissprot = P55041)</p> <p>1 MTLNNVTMRQ GTVGMQPQQR WSIIPADARHL MVQKDPHPCN LNRNHSTAPE EHCRRSWSSD<br/> 61 STDSVISES GNTYYRVVLI GEQVGVKSTL ANIFAGVHDS MDSQCEVLGE DTYERTLVVD<br/> 121 GESATIILLD MWENKGENEW LHDHMQVGD AYLIIVYSITD RASFEEKASEL RIQLRRARQT<br/> 181 EDIPIILVGN KSDLVRCREV SVSEGRACAV VFDCKFIETS AAVQHNVKEL FEGIVRQVRL<br/> 241 RRDSKEKNER RLAYQKRRES IPRKARRFWG KIVAKNNKMN AFKLSKSCH DLSVL</p> <p>&gt;gi 38258884 sp P55041.2 GEM_MOUSE RecName: Full=GTP-binding protein GEM;<br/> AltName: Full=GTP-binding mitogen-induced T-cell protein; AltName: Full=RAS-like protein KIR</p> <p>MTLNNVTMRQGTVGMQPQQRWSIPADARHLMVQKDPHPCNLRNRNHSTAPEEHCRRSWSSDSTDSVISES<br/> GNTYYRVVLI GEQVGVKSTLANIFAGVHDSMDSQCEVLGEDTYERTLVVDGESATIILLDMWENKGENEW<br/> LHDHMQVGDAYLIIVYSITDRASFEEKASELRIQLRRARQTEDIPIILVGNKSDLVRCREVSSEGRACAV<br/> VFDCKFIETSAAVQHNVKELFEGIVRQVRLRRDSKEKNERRLAYQKRRESIPRKARRFWGKIVAKNNKMN<br/> AFKLSKKSCHDLSVL</p> <p><b>Notes</b><br/> Member of RGK small GTP-binding protein family, which includes Kir/Gem, Rad, Rem and Rem2.<br/> Mouse - Phosphorylation on S22 and S288 (QQRWpS<sup>22</sup>IP and KLKSKpS<sup>289</sup>CH) is required for binding of 14-3-3, which also retains Kir/Gem in the cytosol, whereas phosphorylation on S286 prevents the association and/or favors the dissociation of 14-3-3 via an unknown mechanism (Mahalakshmi et al 2007).<br/> Human - Phosphorylation of serine 289 in conjunction with serine 23 results in bidentate 14-3-3 binding, leading to increased Gem protein half-life (Ward et al 2004). (Ser23 in human GEM corresponds to Ser22 in mouse GEM)</p> <p><b>References to 14-3-3 binding to Kir/Gem</b><br/> Mahalakshmi RN, Nagashima K, Ng MY, Inagaki N, Hunziker W, Béguin P. Nuclear transport of Kir/Gem requires specific signals and importin alpha5 and is regulated by calmodulin and predicted serine phosphorylations. Traffic. 2007 Sep;8(9):1150-63.<br/> Mahalakshmi RN, Ng MY, Guo K, Qi Z, Hunziker W, Béguin P. Nuclear localization of endogenous RGK proteins and modulation of cell shape remodeling by regulated nuclear transport. Traffic. 2007 Sep;8(9):1164-78.<br/> Béguin P, Mahalakshmi RN, Nagashima K, Cher DH, Takahashi A, Yamada Y, Seino Y, Hunziker W. 14-3-3 and calmodulin control subcellular distribution of Kir/Gem and its regulation of cell shape and calcium channel activity. J Cell Sci. 2005 May 1;118(Pt 9):1923-34.<br/> Ward Y, Spinelli B, Quon MJ, Chen H, Ikeda SR, Kelly K. Phosphorylation of critical serine residues in Gem separates cytoskeletal reorganization from down-regulation of calcium channel activity. Mol Cell Biol. 2004 Jan;24(2):651-61.</p> |                                                                        |
| <p><b>Mouse Grb10</b> Growth factor receptor-bound protein 10 (GRB10 adapter protein) (Swissprot = Q60760)</p>                                                                                                                                                                                                                                                                                                                                                                                                                                                                                                                                                                                                                                                                                                                                                                                                                                                                                                                                                                                                                                                                                                                                                                                                                                                                                                                                                                                                                                                                                                                                                                                                                                                                                                                                                                                                                                                                                                                                                                                                                                                                                                                                                                                                                                                                                                                                                                                                                                                                                                                                                                                                           |                                                                        |

|                                                                                                                                                                                                                                                                                                                                                                                                                                                                                                                                                                                                                                                                                                                                                                                                                                                                                                                                                                                                                                                                                                                                                                                                                                                                                                                                                                                                                                                                                                                                                                                                                                                                                                                                                                                                                                                                                                                                                                                                                                                                                                                                                                                                                                                                                                                                                                                                                                                                                                                                                                                                                                                                                                                                                                                                                                                                                                                                                                     |                                             |
|---------------------------------------------------------------------------------------------------------------------------------------------------------------------------------------------------------------------------------------------------------------------------------------------------------------------------------------------------------------------------------------------------------------------------------------------------------------------------------------------------------------------------------------------------------------------------------------------------------------------------------------------------------------------------------------------------------------------------------------------------------------------------------------------------------------------------------------------------------------------------------------------------------------------------------------------------------------------------------------------------------------------------------------------------------------------------------------------------------------------------------------------------------------------------------------------------------------------------------------------------------------------------------------------------------------------------------------------------------------------------------------------------------------------------------------------------------------------------------------------------------------------------------------------------------------------------------------------------------------------------------------------------------------------------------------------------------------------------------------------------------------------------------------------------------------------------------------------------------------------------------------------------------------------------------------------------------------------------------------------------------------------------------------------------------------------------------------------------------------------------------------------------------------------------------------------------------------------------------------------------------------------------------------------------------------------------------------------------------------------------------------------------------------------------------------------------------------------------------------------------------------------------------------------------------------------------------------------------------------------------------------------------------------------------------------------------------------------------------------------------------------------------------------------------------------------------------------------------------------------------------------------------------------------------------------------------------------------|---------------------------------------------|
| <p>1 MNNDINSSVE SLNSACNMQS DTDAPLLED GQHASNQGAA SSSRGQPQAS PRQKMQRSQP<br/> 61 VHILRRRLQEE DQQLRTASLP AIPNPFPELT GAAPGSPSPV APSLPPPPS QPPAKHCGRC<br/> 121 EKWIPIGENTR GNGKRKIWRW QFPPGFQLSK LTRFGLWTKT TARFSSKKQPK NQCPTDTVNR<br/> 181 VARMPQSOME KLRLRKDVKV FSEDGTSKVV EILTDMTARD LCQLLVYKSH CVDDNSWTLV<br/> 241 EHHPQLGLER CLEDHEIVVQ VESTMPSESK FLFRKNYAKY EFFKNPNVFF PDQMNVNCQQ<br/> 301 SNGGQALLQ NFLNTSSCPE IQGFQVKEV GRKSWKKLYV CLRRSGLYYS TKGTSKEPRH<br/> 361 LQLLADLEES SIFYLIAGKK QYNAPNEHGM CIKPNKARTE MKELRLLCAE DEQIRTCWMT<br/> 421 AFRLLYGML LYQNYRIPQR KGLPPFNAP MRSVSENSLV AMDFSGQIGR VIDNPAAEQS<br/> 481 AALEEGHAWR KRSTRMNILS SQSPLHPSTL NAVIHRTQHW FHGRISREES HRIIKQGLV<br/> 541 DGLFLLRDSQ SNPRAFVLT L CHHQKIKNFQ ILPCEDDGQT FFTLDDGNTK FSDLIQLVDF<br/> 601 YQLNKGVLPC KLKHHICIRVA L</p> <p>&gt;gi 57015407 sp Q60760.2 GRB10_MOUSE RecName: Full=Growth factor receptor-bound protein 10; AltName: Full=GRB10 adapter protein<br/> MNNDINSSVESLNSACNMQSDTDAPLLEDGQHASNQGAASSSRGQPQASPRQKMQRSQPVHILRRRLQEE<br/> DQQLRTASLPAIPNPFPELTGAAPGSPSPVAPSSLPPPPSPPAKHCGRCEKWIPIGENTRNGKRIWRW<br/> QFPPGFQLSKLRPLGLWTKTARFSSKKQPKNQCPTDTVNPVARMPQSOMEKLRLRKDVKVFSFDGTSKVV<br/> EILTDMTARDLCQLLVYKSHCVDDNSWTLVEHHPQLGLERCLEDEIVVQVESTMPSESKFLFRKNYAKY<br/> EFFKNPNVFFPDQMNVNCQQSNGGQALLQNFLNTSSCPEIQGFQVKEVGRKSWKKLYVCLRRSGLYYS<br/> TKGTSKEPRHLQLLADLEESSIFYLIAGKKQYNAPNEHGMCIKPNKARTEMKELRLLCAEDEQIRTCWMT<br/> AFRLLYGMLLYQNYRIPQRKGLPPFNAPMRSVSENSLVAMDFSGQIGRVIDNPAAEQSAALEEGHAWR<br/> KRSTRMNILSSQSPLHPSTLNAVIHRTQHWFHGRISREESHRIIKQGLVDGLFLLRDSQSNPKAFVLT<br/> CHHQKIKNFQILPCEDDGQTFFTLDDGNTKFSDLIQLVDFYQLNKGVLPCPKLKHHCIRVAL</p> <p><b>Notes</b><br/> “The 14-3-3.Grb10 interaction requires phosphorylation of Grb10, and only the phosphorylated form of Grb10 co-immunoprecipitates with endogenous 14-3-3. We could identify a putative phosphorylation site in Grb10, which is located in a classical 14-3-3 binding motif, RSVSEN. Mutation of this site in Grb10 diminished binding to 14-3-3. Thus, Grb10 exists in two different states of phosphorylation and complexes with 14-3-3 when phosphorylated on serine 428.” (Urschel et al 2005) (RSVpS<sup>428</sup>EN = Ser455 in Swissprot Q60760)<br/> “Mutagenesis of serine 428 to alanine, an Akt phosphorylation site known to promote the interaction of Grb10 to 14-3-3 (21), also prevented the Grb10 anti-apoptotic activity.” (Kebache et al 2007) Kebache et al (2007) used the isoform Mouse Grb10(delta).</p> <p><b>References to 14-3-3 binding to Grb10</b><br/> Urschel S, Bassermann F, Bai RY, Münch S, Peschel C, Duyster J. Phosphorylation of grb10 regulates its interaction with 14-3-3. <i>J Biol Chem.</i> 2005 Apr 29;280(17):16987-93.<br/> Kebache S, Ash J, Annis MG, Hagan J, Huber M, Hassard J, Stewart CL, Whiteway M, Nantel A. Grb10 and active Raf-1 kinase promote Bad-dependent cell survival. <i>J Biol Chem.</i> 2007 Jul 27;282(30):21873-83.</p> |                                             |
| <p><b>Mouse KCNK18 (TRESK)</b> Potassium channel subfamily K member 18 (SwissProt =Q6VV64)<br/> 1 MEAEPEPEAR RCCPEALGKA RGCCPEALGK LLPGLCFLCC LVTYALVGAA LFSAVEGRPD<br/> 61 PEAEENPELK KFLDDLNLKCNLTVVVEGSRKNLCEHLQHLKLPQWLKAPQDWSFLSALFFCCTVFTVGYGHMYPVTRLG<br/> 121 CCTVFSTVGY GHMYPVTRLG KFLCMLYALF GIPLMFLVLT DIGDILATIL SRAYSRFQAL<br/> 181 LCLPHDIFKW RSLPLCRKQP DSKPVEEAIP QIVIDAGVDE LLNPQPSKDP PSPSCNVELF<br/> 241 ERLVAREKKN KLQPPTRPVE RSNSCPELV LRLSCSILSN LDEVGQOVER LDIPLPVIAL<br/> 301 VVFAYISCAA AILPFWETEL GFEDAFYFCF VTLTTIGFGD IVLVHHPHFFL FFSIYIIVGM<br/> 361 EILFIAFKLM QNRLHLYTKT LMLFVCQREV SLPW</p> <p>&gt;gi 81893086 sp Q6VV64.1 KCNKI_MOUSE RecName: Full=Potassium channel subfamily K member 18; AltName: Full=Two-pore-domain potassium channel TRESK<br/> MEAEPEPEARCCPEALGKARGCCPEALGKLLPGLCFLCLLVTYALVGAAALFSAVEGRPDPEAEENPELK<br/> KFLDDLNLKCNLTVVVEGSRKNLCEHLQHLKLPQWLKAPQDWSFLSALFFCCTVFTVGYGHMYPVTRLG<br/> KFLCMLYALFGIPLMFLVLTDIGDILATILSRAYSRFQALLCLPHDIFKWRSLPLCRKQPDSKPVEEAIP<br/> QIVIDAGVDELLNPQPSKDPSPSCNVELFERLVAREKKNKLQPPTRPVERSNSCPELVLRSLCSILSN<br/> LDEVGQOVERLDIPLPVIALVVFAYISCAAAILPFWETELGFEDAFYFCFVTLTTIGFGDIVLVHHPHFFL<br/> FFSIYIIVGM EILFIAFKLMQNRLHLYTKT LMLFVCQREV SLPW</p> <p><b>Notes</b><br/> KCNK18 (TRESK) Outward rectifying potassium channel. Produces rapidly activating outward rectifier K(+) currents. May function as background potassium channel that sets the resting membrane potential. Inhibited by arachidonic acid and other naturally occurring unsaturated free fatty acids. Channel activity is enhanced by volatile anesthetics, such as isoflurane. Belongs to the two pore domain potassium channel (TC 1.A.1.8) family.<br/> Coexpression of 14-3-3eta with TRESK blocked, whereas the coexpression of a dominant negative form of 14-3-3eta accelerated the return of the K(+) current to the resting state after the activation mediated by calcineurin in <i>Xenopus</i> oocytes. Phosphorylation of serine 264 in mouse TRESK was required for the binding of 14-3-3eta.</p> <p><b>References to 14-3-3 binding to KCNK18 (TRESK)</b><br/> Czirják G, Vuity D, Enyedi P. Phosphorylation-dependent binding of 14-3-3 proteins controls TRESK regulation. <i>J Biol Chem.</i> 2008 Jun 6;283(23):15672-80.</p>                                                                                                                                                                                                                                                                                                                                                                                                                                                                                                                                                                                                                                                            |                                             |
| <p><b>Mouse lipin-1alpha</b> Fatty liver dystrophy protein (Swissprot for lipin-1 = Q91ZP3)<br/> 1 MNYVQGALAGQ VFTVTKELYK GLNPATLSCG IDIIVIRQPN GSLQCSFFHV RFGKMGVLR<br/> 61 REKVVDIEIN GESVDLHMKL GDNGEAFFVQ ETDNDQEIIP MYLATSPILS EGAARMESQL<br/> 121 KRNSVDIRIC LDPTTAAQGL PPSDTPSTGS LGKRRKRKR KAQLDNLKRD DNVNSSEDED<br/> 181 MFPIEMSSDE DTAPMDGSR TLPNDVPPFQD DIPKENFPSI STHPQSASYP SSDREWSPSP<br/> 241 SSLVDCQRT PHLAEGVLSS SCPLQSCFH ASESPSGSRP STPKSDSELV SKSADRLTPK<br/> 301 NNLEMLWLWG ELPQAAKSS PHKMKESSPL GSRKTPDKMN FQAIHSESS TFSQSPPTMA<br/> 361 RGLLIHQSKA QTEMQFVNEE DLESLGAAAP PSPVAEELKA PYPNTAQSSS KTDSPSRKRD<br/> 421 KRSHRLGADG VYLDLTDMD PEVAALYFPK NGDPGGLPKQ ASDNGARSAN QSPQSVGGSG<br/> 481 IDSGVESTSD SLRDLPSIAI SLCGGLSDHR EITKDAFLEQ AVSYQQFADN PAIIDDPNLV<br/> 541 VKVGNKYYNW TTAAPLLLAM QAFQKPLPKA TVESIMRDKM PKKGRWWFS WRGRNATIKE<br/> 601 ESKPEQCLTG KGHNTGEQPA QLGLATRIKH ESSSSDEEHA AAKPSGSSHL SLLSNVSYKK<br/> 661 TLRLTSEQLK SLKLNKGNPD VVFSVTTQYQ GTCRCEGTIY LWNWDDKVII SDIDGTITRS</p>                                                                                                                                                                                                                                                                                                                                                                                                                                                                                                                                                                                                                                                                                                                                                                                                                                                                                                                                                                                                                                                                                                                                                                                                                                                                                                                                                                                                                                                                                                                                                                                                                                                                                                                                                                                                                                                                                                                                           | <p>SITE(S) NOT DEFINED. NOT IN WEBLOGO.</p> |



|                                                                                                                                                                                                                                                                                                                                                                                                                                                                                                                                                                                                                                                                                                                                                                                                                                                                                                                                                                                                                                                                                                                                                                                                                                                                                                                                                                                                                                                                                                                                                                                                                                                                                                                                                                                                                                                                                                                                                                                                                                                                                                                                                                                                                                                                                                                                                                                                                                                                                                                                                                                                                                                                                                                                                                                                                                                                                                                                                                                                                                                                                                                                                                                                                                                                                                                                                                                                                                                                                                                                                     |                                     |
|-----------------------------------------------------------------------------------------------------------------------------------------------------------------------------------------------------------------------------------------------------------------------------------------------------------------------------------------------------------------------------------------------------------------------------------------------------------------------------------------------------------------------------------------------------------------------------------------------------------------------------------------------------------------------------------------------------------------------------------------------------------------------------------------------------------------------------------------------------------------------------------------------------------------------------------------------------------------------------------------------------------------------------------------------------------------------------------------------------------------------------------------------------------------------------------------------------------------------------------------------------------------------------------------------------------------------------------------------------------------------------------------------------------------------------------------------------------------------------------------------------------------------------------------------------------------------------------------------------------------------------------------------------------------------------------------------------------------------------------------------------------------------------------------------------------------------------------------------------------------------------------------------------------------------------------------------------------------------------------------------------------------------------------------------------------------------------------------------------------------------------------------------------------------------------------------------------------------------------------------------------------------------------------------------------------------------------------------------------------------------------------------------------------------------------------------------------------------------------------------------------------------------------------------------------------------------------------------------------------------------------------------------------------------------------------------------------------------------------------------------------------------------------------------------------------------------------------------------------------------------------------------------------------------------------------------------------------------------------------------------------------------------------------------------------------------------------------------------------------------------------------------------------------------------------------------------------------------------------------------------------------------------------------------------------------------------------------------------------------------------------------------------------------------------------------------------------------------------------------------------------------------------------------------------------|-------------------------------------|
| <p>721 DTLGHILPPTL GKDWITHQGIA KLYHKVSQNG YKFLYCSARA IGMADMTRGY LHWVNERGTV<br/> 781 LPQGPLLSP SSLFSALHRE VIEKKPEKFK VQCLTDIKNL FFPNTEPFYA AFGNRPADVY<br/> 841 SYKQGVVSLN RIFTVNPKEG LVQEHAKTNI SSYVRLCEVV DHVPPLLRKS HSCDFPCSDT<br/> 901 FSNFTFWREP LPPFENQDMH SASA</p> <p><b>Notes</b><br/> Insulin stimulated 14-3-3 binding to lipin-1<math>\alpha</math> in 3T3-L1 adipocytes, and a serine-rich region (residues 218 to 260) was implicated in binding to 14-3-3, but precise site(s) were not defined (Péterfy et al 2009).</p> <p><b>References to 14-3-3 binding to lipin-1<math>\alpha</math></b><br/> Péterfy M, Harris TE, Fujita N, Reue K. Insulin-stimulated interaction with 14-3-3 promotes cytoplasmic localization of lipin-1 in adipocytes. <i>J Biol Chem.</i> 2009 Dec 2. [Epub ahead of print]</p>                                                                                                                                                                                                                                                                                                                                                                                                                                                                                                                                                                                                                                                                                                                                                                                                                                                                                                                                                                                                                                                                                                                                                                                                                                                                                                                                                                                                                                                                                                                                                                                                                                                                                                                                                                                                                                                                                                                                                                                                                                                                                                                                                                                                                                                                                                                                                                                                                                                                                                                                                                                                                                                                                                                            |                                     |
| <p><b>Mouse Myo1c</b> (Swissprot = Q9WTI7)</p> <p>1 MALQVELIPT GEIIRVVHPH RPCKLALGSD GVRVTMESAL TARDRVGVQD FVLENFTSE<br/> 61 AAFIENLRRR FRENLIYTYI GPVLVSVNPY RDLQIYSRQH MERYRGVSFY EVPPHLFAVA<br/> 121 DTVYRALRTE RRDQAVMISG ESGAGKTEAT KRLLQFYAET CPAPERGGAV RDRLLQSNPV<br/> 181 LEAFGNAKTL RNDNSRFGK YMDVQDFDKG APVGGHILSY LLEKSRVVHQ NHGERNFHV<br/> 241 YLLEGGEEE TLRLGLERN PQSYLYLVKG QCAKVSIND KSDWKVMRKA LSVIDFTEDE<br/> 301 VEDLLSIVAS VLHLGNIHFA ADEDSNAQVT TENQLKYLTR LLGVEGTLR EALTHRKI IA<br/> 361 KGEELLSPLN LEQAAYARDA LAKAVYSRTF TWLVRKINRS LASKDAESPS WRSTTVLGLL<br/> 421 DIYGFEVFOHNSFEQFCINYNCEKQQFLI ELTLKSEQEE YEAEGLAWEP VQYFNKII C<br/> 481 DLVEEKFKGI ISILDEECLR PGEATDLTFL EKLEDTVKPH PHFLTHKLAD QKTRKSLDRG<br/> 541 EFRLHYAGE VTYSVTGFLD KNDLLFRNL KETMCSSMNP IMAQCDFKSE LSDKKRPETV<br/> 601 ATQFKMSLLQ LVEILRSKEP AYIRCIKPN AKQPRGFDEV LIRHQVKYLG LMENLRVRR<br/> 661 GFAYRRKYEA FLQRYKSLCP ETWPMWAGRP QDGVAVLVRH LGYKPEEYKM GRTKIFIRFP<br/> 721 KTLFATEDSL EVRRQSLATK IQAAWRGFHW RQKFLRVKRS AICIQSWWRG TLGRRKA<br/> 781 KWAAQTIRRL IRGFILRHSP RCPENAFFLD HVRASFLNL RRQLPRNVLD TSWPTPPAL<br/> 841 REASELLREL CMKNMVWYCRSISPEWKQQLQKAVASEI FKGKKNYPQ SVPRLFISTR<br/> 901 LGTEEISPRV LQSLGSEPIQ YAVPVVYDR KGYKPRRQL LLTPSAVVIV EDKVKQRID<br/> 961 YANLTGISVS SLSDSLFVLH VQREDNKQKG DVVLQSDHVI ETLTKTALSA DRVNNININQ<br/> 1021 GSITFAGGPG RDGIIDFTSG SELLITKAKN GHLAVVAPRL NSR</p> <p>&gt;gi 226693542 sp Q9WTI7.2 MYO1C MOUSE RecName: Full=Myosin-Ic; AltName:<br/> Full=Myosin I beta; AltName: Full=MMI-beta; Short=MMIb</p> <p>MALQVELIPTGEIIRVVHPHRPCKLALGSDGVRVTMESALTARDRVGVQDFVLENFTSEAAAFIENLRRR<br/> FRENLIYTYIGPVLVSVNRYRDLQIYSRQHMERYRGVSFYEVPPHLFAVADTVYRALRTERRDQAVMISG<br/> ESGAGKTEATKRLLQFYAETCPAPERGGAVRDRLLQSNPVLEAFGNAKTLRNDNSRFGKYMDVQDFDKG<br/> APVGGHILSYLLEKSRVVHQNHGERNFHVYQLEGGEEETLRLGLERNPQSYLYLVKGQCAKVSIND<br/> KSDWKVMRKA LSVIDFTEDEVEDLLSIVASVLHLGNIHFAADEDSNAQVTENQLKYLTRLLGVEGTLR<br/> EALTHRKI IAKGEELLSPLNLEQAAYARDA LAKAVYSRTFTWLVRKINRS LASKDAESPSWRSTTVLGLL<br/> DIYGFEVFOHNSFEQFCINYNCEKQQFLIELTLKSEQEEYEAEGLAWEPVQYFNKIIICDLVEEKFKGI<br/> ISILDEECLRPGEATDLTFL EKLEDTVKPHPHFLTHKLADQKTRKSLDRGEFRLHYAGEVTYSVTGFLD<br/> KNDLLFRNLKETMCSSMNP IMAQCDFKSELSDDKKRPETVATQFKMSLLQLVEILRSKEPAYIRCIKPN<br/> AKQPRGFDEV LIRHQVKYLG LMENLRVRRAGFAYRRKYEAFLQRYKSLCPETWPMWAGRPQDGVAVLVRH<br/> LGYKPEEYKMGRTKIFIRFPKTLFATEDSLEVRRQSLATKIQAAWRGFHW RQKFLRVKRS AICIQSWWRG<br/> TLGRRKA AAKRWAAQTIRRLIRGFILRHSP RCPENAFFLDHVRASFLNLRRQLPRNVLD TSWPTPPAL<br/> REASELLREL CMKNMVWYCRSISPEWKQQLQKAVASEIFKGKKNYPQSVPRLFISTR LGTEEISPRV<br/> LQSLGSEPIQYAVPVVYDRKGYKPRRQLLLTPSAVVIVEDAKVKQRIDYANLTGISVSSLSDSL FVLH<br/> VQREDNKQGDVVLQSDHVIETLTKTALSADRNNININQGSITFAGGPGRDGIIDFTSGSELLITKAKN<br/> GHLAVVAPRLNSR</p> <p><b>Notes</b><br/> Myo1c undergoes insulin-dependent phosphorylation at S701 (EVRRQ(pS701)LATKKQAA). Phosphorylation was accompanied by enhanced 14-3-3 binding and reduced calmodulin binding. Ser701= Ser736 in Q9WTI7.</p> <p><b>References to 14-3-3 binding to Myo1c</b><br/> Yip MF, Ramm G, Larance M, Hoehn KL, Wagner MC, Guilhaus M, James DE. CaMKII-mediated phosphorylation of the myosin motor Myo1c is required for insulin-stimulated GLUT4 translocation in adipocytes. <i>Cell Metab.</i> 2008 Nov;8(5):384-98.<br/> Dubois F, Vandermoere F, Gernez A, Murphy J, Toth R, Chen S, Geraghty KM, Morrice NA, Mackintosh C. Differential 14-3-3-affinity capture reveals new downstream targets of PI 3-kinase signaling. <i>Mol Cell Proteomics.</i> 2009 Aug 1.</p> |                                     |
| <p><b>Mouse Synpo2</b> Synaptopodin 2 (myopodin) (Swissprot = Q91YE8)</p> <p>1 MGTGDFICIS MTGGAPWGF LQGGKEEQP LQVAKIRSQS KASGSGLRG DEVVSINGNP<br/> 61 CADLTYPEVI KLMEGITDSL HLLVKRPSG TSETLDSESE TTNHQHLTHE GPMESTTLQI<br/> 121 QATATQSED FFLAPVQTKV PLTEDQSNW GYAECPKKEEQ APPMLGSQEG HLVEEVILRQ<br/> 181 KAEAGQPGHV VELQLSLSKE RHQCTSGPIV TLQNDKSTS PDPDWSSQLE RTVHINSIPA<br/> 241 PEKADTSLTS STSSGRELRV IQGRDPGGAG LPQVEVILDC SDRLKAECCR LQTGRGCVAS<br/> 301 PVEGGRSEAP PSLVSFAVSS EGTGEGEDQR SGKDQSRPHK HRARHARLRR SESLSEKQVK<br/> 361 EAKSKCKSIA LLLTDAPNPN SKGVLMFKKR RRRARKYTLV SYGTGELERE EEEEEQEQAG<br/> 421 DKDEISEVAF LGTSESEVDE ELLSDVDDNT QVNFVDWDSG LVDIEKRLNR GDKMEMLPDT<br/> 481 TGKGMALFAK RRERMEQFTA QNEEEKTGGM AGGGPDALQT DGLRTMTSYQ RKEESVVMQS<br/> 541 VSSESSFQMG RSLASVPPQN GFSGVSETAG AQRMFPMNRT AKPFLGSMNQ PAAPFSPTRS<br/> 601 VTSPISDFFA PPPYSAVSP PEAFSRGVSS PVAGPAQPPP WPQPAPWSQP AFYDSSEQIA<br/> 661 SRDERIAVPA KRTGILQEA RRGTTKPMFT FKETKVS PNP ELLSLLQNAE GKRGTGGDSG<br/> 721 PEEDYLSLGA EACNFMQSSA KQKTPPPVAP KPAVKSPSSS QVPAPVSPVW SPGVAQAQRP<br/> 781 AFSTSNPPNP PQVTAVSSIK IAQPAAPPAR PASALNLGAP FKGPQAVVVS HNYTPKPSAP<br/> 841 TPLVNAAPAG AGGPNELPG MSGKGAQLFA KRQSRMEKYV VDSDTVQAH T VRAQSPTPSL<br/> 901 PASWKYSSNV RAPPVAYNP IHSPSYPLAA IKSQPPGAQA SKTSKKKGGK PLNTLDVMKH<br/> 961 QPYQLNASLF TFQPPDSKDG LPQKSTVKVS SAPAMKQALP PRQANVGSPT NAQASSVYSV<br/> 1021 PAYTSQPNFF AAEATSPVSA SPVPVSVPTS PKQESTSSTYS FVAPRPKFS A KKSQVTVQEN</p>                                                                                                                                                                                                                                                                                                                                                                                                                                                                                                                                                                                                                                                                                                                                                                                                                                                                                                                                                                                                                                                                                                                                                                                                                                                                                                                                                                                                                                                                                                                                                                                                                                                                                                                                                                                                                                                                                                                                                                                                                                                                           | <p>SEQUENCES DIFFER FROM 1078aa</p> |

|                                                                                                                                                                                                                                                                                                                                                                                                                                                                                                                                                                                                                                                                                                                                                                                                                                                                                                                                                                                                                                                                                                                                                                                                                                                                                                                                                                                                                                                                                                                                                                                                                                                                                                                                                                                                                                                                                                                                                                                                                                                                                                                                                                                                                                                                                                                                                                                                         |                                                     |
|---------------------------------------------------------------------------------------------------------------------------------------------------------------------------------------------------------------------------------------------------------------------------------------------------------------------------------------------------------------------------------------------------------------------------------------------------------------------------------------------------------------------------------------------------------------------------------------------------------------------------------------------------------------------------------------------------------------------------------------------------------------------------------------------------------------------------------------------------------------------------------------------------------------------------------------------------------------------------------------------------------------------------------------------------------------------------------------------------------------------------------------------------------------------------------------------------------------------------------------------------------------------------------------------------------------------------------------------------------------------------------------------------------------------------------------------------------------------------------------------------------------------------------------------------------------------------------------------------------------------------------------------------------------------------------------------------------------------------------------------------------------------------------------------------------------------------------------------------------------------------------------------------------------------------------------------------------------------------------------------------------------------------------------------------------------------------------------------------------------------------------------------------------------------------------------------------------------------------------------------------------------------------------------------------------------------------------------------------------------------------------------------------------|-----------------------------------------------------|
| <p>1081 GRSLSLPGRS APPIISASPW LYQSACNYSS KPTFELEKAN KRPTPWAAA RSPLGLVDDA<br/> 1141 FRPRNIQESI VAHVVAARR KVSPPGSQEDW KERLSFVQQT QKTNMSFSER QEYPAPSPVN<br/> 1201 SHVSSHLSY SQLPYVCYRQ ESRNDLKTMS METRSEYCLP LGGYDYNPHR RGRWQQP<br/> &gt;gi 51702128 sp Q91YE8.2 SYNP2_MOUSE RecName: Full=Synaptopodin-2; AltName:<br/> Full=Myopodin<br/> MGTGDFICISMTGGAPWGFRLQGGKKEEQQLQVAKIRSQSKASGSLREGDEVVSIINGNPCADLTYPEVI<br/> KLMEGITDLSHLLVRRPSSGTSETLDSSEITNHQHLTHEGPMESTLQIQATETQSEDFFLAPVQTKV<br/> PLTEQDSNAWGAECPKEEQAPPMLGSGEHLVVEVILRQKAEAGQPGHVVELQLSLSKERHQCTSGPIV<br/> TLQGNQKSTSPDPDSSQLERTVHINSI PAPEKADTSLTSSSTSSGRELRLVIQGRDPGGAGLPQVEVILDC<br/> SDRLKAEECRLQGTGRGCVASPVVEGGRSEAPPVSLVFAVSSSEGTEHGEDQSRGKQSRPHKRRARHARLRR<br/> SESLSEKQVKEAKSKCKEIALLLTDAPNPNNSKGVLMFKRRRRRARKYTLVSYGTELEREEEEEEDQEAG<br/> DKDEISEVAFGLTSESEVDEELLSVDVNTQVNFVDFWDSGLVDIEKRLNRGDKMEMLPDITGKALMFAK<br/> RRERMEQFTAQNEEEKTGGMAGGGPDALQTDGLRMTSYQRKEESVRMQSSVSESSFQMGRSLASVPQQN<br/> GFGVSETAGAQRMFPMNRTAKPFLGSMNQPAAPFSPTRSVTSPISDFPAPPYSAVSPPEAFSRGVSS<br/> PVAGAQPPPPWPQAPFWSQPAFYDSEQIASRDERIAVPAKRTGILQEAQRRTKPMFTFKETKVSFNP<br/> ELLSLQNAEGKRTGGDSGPEEDYLSLGAECNFMQSSAKQKTPPVVAPKPAVKSPSSSQPVAPVSPVW<br/> SPGVAPAQRPAFSTSNPPNPQVAVSSIKIAQPAAPPARPASALNLAGPFGKGPQAVVSHNYTPKPSAP<br/> TPLVNAAPAGAGGPNELPMGSGKAQLFAKRQSRMEKYVVDSDTVQAHTVRAQSPTPSLPASWKYSSNV<br/> RAPPVAYNPIHSPSYPLAAIKSQPPGAQASKTSKKKGGKPLNTLDVMKHQPYQLNASLFTFQPPDSKDG<br/> LPQKSTVKSAPAMKQALPPRQANVGSPTNAQASSVYSVPAYTSQPNFFAAEATSFPVSASFPVSPVPTS<br/> PKQESTSTSYFVAPRPKFSAKKSGVTVQVWKPSVVEE</p> <p><b>Notes</b><br/> S225 and T272 mediate the phosphorylation-dependent binding of myopodin to 14-3-3β (The authors must have been working on a shorter protein because in the reference sequence the matching sites for RSLA(pS225)VP and RSV(pT272)SP = Ser555 and Th602)</p> <p><b>References to 14-3-3 binding to myopodin</b><br/> Faul C, Dhume A, Schechter AD, Mundel P. Protein kinase A, Ca<sup>2+</sup>/calmodulin-dependent kinase II, and calcineurin regulate the intracellular trafficking of myopodin between the Z-disc and the nucleus of cardiac myocytes. <i>Mol Cell Biol.</i> 2007 Dec;27(23):8215-27.</p>                                                                                                                                                                                                                  |                                                     |
| <p><b>Mouse WEE1</b> (SwissProt= P30291)<br/> 1 MSFLSRQPPP PRRAGAACT LRQKLIFFSP SCDEEEEEEE EEEGSGHSTG EDSAFOEPDS<br/> 61 PLPPARSPT PGPERRRSPG PAPGSPGELE EDLLLPACG GADEAGGAE GDSWEEEGFG<br/> 121 SSSPVKSPAA PYFLGSSFSF VRCGGPGDAS PRGCGARRAG EGRRSRPHD PGTPPHKTFR<br/> 181 KLRLFDTPHT PKSLLSKARG IDSSSVKLRG SSLFMDTEKS GKREFDVRQT PQVNINPFTF<br/> 241 DSLLLHSSGQ CRRRKRTYWN DSCGEDMEAS DYELEDETRP AKRITITESN MKSRYTTEFH<br/> 301 ELEKIGSGEF GSVFKCVKRL DGCYIAIKRS KKPLAGSVDE QNALREYVYH AVLGQSHSHV<br/> 361 RYFSAWAEDD HMLIQNEYCN GGSGLADAISE NYRIMSYPKE AELKDLLLQV GRGLRYIHS<br/> 421 SLVHMDIKPS NIFISRTSIP NAASEEGDED DWASNKVMFK IGDGLGHVTRI SSPQVEEGDS<br/> 481 RFLANEVLQE NYTHLPKADI FALALTVVCA AGAELPRNG DQWHEIRQGR LPRIPQVLSQ<br/> 541 EFTELLKVM IHPDPERRPSA MALVKHSLV SASRKSAEQL RIELNAEKFK NSLLQKELKK<br/> 601 AQMAKAAAE RALFTDRMAT RSTQSNRST RLIGKMMNRSLTIY<br/> &gt;gi 1351419 sp P30291.2 WEE1_HUMAN RecName: Full=Wee1-like protein kinase;<br/> AltName: Full=Wee1A kinase; AltName: Full=WEE1hu<br/> MSFLSRQPPP PRRAGAACTLRQKLIFFSPSCDEEEEEEEEGSGHSTGEDSAFOEPDSPLPPARSPT<br/> PGPERRRSPG PAPGSPGELEEDLLLPACGGADEAGGAE GDSWEEEGFGSSSPVKSPAAPYFLGSSFSF<br/> VRCGGPGDASPRGCGARRAGEGRRSRPHDHPGTPPHKTFRKLRLFDTPHTPKSLLSKARGIDSSSVKLRG<br/> SSLFMDTEKSGKREFDVRQTPQVNINPFTPDSLLLHSSGQCRRRKRTYWN DSCGEDMEASDYELEDETRP<br/> AKRITITESNMKSRYTTEFHLEKIGSGEF GSVFKCVKRLDGCYIAIKRSKKPLAGSVDEQNALREYVYH<br/> AVLGQSHSHVRYFSAWAEDDHMLIQNEYCNGGSLADAISENYRIMSYPKEAELKDLLLQVGRGLRYIHS<br/> SLVHMDIKPSNIFISRTSIPNAASEEGDED DWASNKVMFKIGDGLGHVTRISPPQVEEGDSRFLANEVLQE<br/> NYTHLPKADIFALALTVVCAAGAELPRNGDQWHEIRQGR LPRIPQVLSQEFTELKVM IHPDPERRPSA<br/> MALVKHSLVLSASRKSAEQLRIELNAEKFKNSLLQKELKKAQMAKAAAEERALFTDRMATRSTTQSNRST<br/> RLIGKMMNRSLTIY</p> <p><b>Notes</b><br/> A sequence in the carboxyl terminus was thought to be necessary for the binding, but precise sites not defined though Ser642 is possible. Wee1 a protein kinase that catalyzes the inhibitory tyrosine phosphorylation of CDC2/cyclin B kinase, and appears to coordinate the transition between DNA replication and mitosis by protecting the nucleus from cytoplasmically activated CDC2 kinase.</p> <p><b>References to 14-3-3 binding to mouse wee1</b><br/> Honda R, Ohba Y, Yasuda H. 14-3-3 zeta protein binds to the carboxyl half of mouse wee1 kinase. <i>Biochem Biophys Res Commun.</i> 1997 Jan 13;230(2):262-5.</p> | <p>SITES NOT DEFINED PRECISELY. NOT IN WEBLOGO.</p> |
| <p><b>Mouse ZFP36</b> Tristetraprolin (TTP) (Swissprot = P22893)<br/> 1 MDLSAIYESL QSMHDLSSD HGGTESLGLL WNINSDSIPS GVTSRILTGRS TSLVEGRSCG<br/> 61 WVPPPGFAP LAPRPGPELS PSPTSPTATP TTSSRYKTEL CRTYSESGRC RYGAQCQFAH<br/> 121 GLGELRQANR HPKYKTELCH KFYLGRCY GSRCHFIHNP TEDLALPGQP HVLRQSIYFS<br/> 181 GLPSGRRSSP PPPGFSGLS SSCSFSPPSS PPPGDLPLS PSAFSAAPGT PVTRRDPNQA<br/> 241 CCPSCRRSTT PSTIWGPLGG LARSFSAHSL GSDPDDYASS GSSLGSDSP VFEAGVFGPP<br/> 301 QTPAPRRRLP IFNRISVSE<br/> &gt;gi 135862 sp P22893.1 TTP_MOUSE RecName: Full=Tristetraproline; Short=TTP;<br/> AltName: Full=Zinc finger protein 36; Short=Zfp-36; AltName: Full=Protein<br/> TIS11A; Short=TIS11; AltName: Full=Growth factor-inducible nuclear protein<br/> NUP475; AltName: Full=TPA-induced sequence 11<br/> MDLSAIYESLQSMHDLSSDHGGTESLGLLWNINSDSIPS GVTSRILTGRSTSLVEGRSCGWVPPPGFAP<br/> LAPRPGPELSPPTSPTATPTTSSRYKTELCRTYSESGRCRYGAKCQFAHGLGELRQANRHPKYKTELCH<br/> KFYLGRCY GSRCHFIHNP TEDLALPGQP HVLRQSIYFSGLPSGRRSSPPPGFSGLS SSCSFSPPSS<br/> PPPGDLPLS PSAFSAAPGTPVTRRDPNQA CCPSCRRSTT PSTIWGPLGGLARSFSAHSLGSDPDDYASS</p>                                                                                                                                                                                                                                                                                                                                                                                                                                                                                                                                                                                                                                                                                                                                                                                                                                                                                                                                                                                                                                                                                                                                                                                                                                                                                                 |                                                     |

|                                                                                                                                                                                                                                                                                                                                                                                                                                                                                                                                                                                                                                                                                                                                                                                                                                                                                                                                                                                                                                                                                                                                                                                                                                                                                                                                                                                                                                                                                                                                                                                                                                                                                                                                                                                                                                                                                                                                                                                                                                                                                                                                                                                                                                                                                                              |                                   |
|--------------------------------------------------------------------------------------------------------------------------------------------------------------------------------------------------------------------------------------------------------------------------------------------------------------------------------------------------------------------------------------------------------------------------------------------------------------------------------------------------------------------------------------------------------------------------------------------------------------------------------------------------------------------------------------------------------------------------------------------------------------------------------------------------------------------------------------------------------------------------------------------------------------------------------------------------------------------------------------------------------------------------------------------------------------------------------------------------------------------------------------------------------------------------------------------------------------------------------------------------------------------------------------------------------------------------------------------------------------------------------------------------------------------------------------------------------------------------------------------------------------------------------------------------------------------------------------------------------------------------------------------------------------------------------------------------------------------------------------------------------------------------------------------------------------------------------------------------------------------------------------------------------------------------------------------------------------------------------------------------------------------------------------------------------------------------------------------------------------------------------------------------------------------------------------------------------------------------------------------------------------------------------------------------------------|-----------------------------------|
| <p>GSSSLGGSDSPVFEAGVFGPPQTPAPPRRLPIFNRI SVSE</p> <p><b>Notes</b><br/>Tristetraprolin (TTP) is a regulatory protein with a zinc finger structure that regulates cellular responses to growth factors. MAPKAP kinase-2 (MK2)-induced phosphorylation at serines 52 (RST(pS52)LV) and 178 (RQSI(pS178)FS), which promotes the assembly of TTP:14-3-3 complexes LRQSI(pS)FSGGLPC</p> <p><b>References to 14-3-3 binding to tristetraprolin</b><br/>Johnson BA, Stehn JR, Yaffe MB, Blackwell TK. Cytoplasmic localization of tristetraprolin involves 14-3-3-dependent and -independent mechanisms. <i>J Biol Chem.</i> 2002 May 17;277(20):18029-36.<br/>Chrestensen CA, Schroeder MJ, Shabanowitz J, Hunt DF, Pelo JW, Worthington MT, Sturgill TW. MAPKAP kinase 2 phosphorylates tristetraprolin on in vivo sites including Ser178, a site required for 14-3-3 binding. <i>J Biol Chem.</i> 2004 Mar 12;279(11):10176-84.<br/>Stoecklin G, Stubbs T, Kedersha N, Wax S, Rigby WF, Blackwell TK, Anderson P. MK2-induced tristetraprolin:14-3-3 complexes prevent stress granule association and ARE-mRNA decay. <i>EMBO J.</i> 2004 Mar 24;23(6):1313-24.<br/>Rigby WF, Roy K, Collins J, Rigby S, Connolly JE, Bloch DB, Brooks SA. Structure/function analysis of tristetraprolin (TTP): p38 stress-activated protein kinase and lipopolysaccharide stimulation do not alter TTP function. <i>J Immunol.</i> 2005 Jun 15;174(12):7883-93.<br/>Gringhuis SI, García-Vallejo JJ, van Het Hof B, van Dijk W. Convergent actions of I kappa B kinase beta and protein kinase C delta modulate mRNA stability through phosphorylation of 14-3-3 beta complexed with tristetraprolin. <i>Mol Cell Biol.</i> 2005 Aug;25(15):6454-63.<br/>Marderosian M, Sharma A, Funk AP, Vartanian R, Masri J, Jo OD, Gera JF. Tristetraprolin regulates Cyclin D1 and c-Myc mRNA stability in response to rapamycin in an Akt-dependent manner via p38 MAPK signaling. <i>Oncogene.</i> 2006 Oct 12;25(47):6277-90.<br/>Sun L, Stoecklin G, Van Way S, Hinkovska-Galcheva V, Guo RF, Anderson P, Shanley TP. Tristetraprolin (TTP)-14-3-3 complex formation protects TTP from dephosphorylation by protein phosphatase 2a and stabilizes tumor necrosis factor-alpha mRNA. <i>J Biol Chem.</i> 2007 Feb 9;282(6):3766-77.</p> |                                   |
| <p><b>Rabbit CSNK1A1</b> Casein kinase I isoform alpha (Swissprot = P67828)</p> <p>1 MASSSGSKAE FIVGKYLKLV RKIGSGSFGD IYLAINITNG EEVAVKLESQ KARHPQLLYE<br/>61 SKLYKILQGG VGIPHIRWYG QEKDYNVLMV DLLGPSLEDL FNFCSRRTM KTVLMLADQM<br/>121 ISRIEYVHTK NFIHRDIKPD NFLMGIGRHC NKLFLIDFGL AKKYRDNRT RQHIPPYREDKN<br/>181 LTGTARYASI NAHLGIEQSR RDDMESLGYV LMYFNRTSLP WQGLKAATKK QKYEKISEKK<br/>241 MSTPVEVLCK GFPAEFAMYL NYCRLRFEE APDYMYLRQL FRILFRTLNH QDYTFDWTM<br/>301 LKQKAAQQA SSSGQQAQ TPTGF</p> <p>&gt;gi 54037515 sp P67828.1 KC1A_RABIT RecName: Full=Casein kinase I isoform alpha; Short=CKI-alpha; AltName: Full=CK1</p> <p>MASSSGSKAEFIVGKYLKLV RKIGSGSFGDIYLAINITNGEEVAVKLESQKARHPQLLYESKLYKILQGG<br/>VGIPHIRWYGQEKDYNVLMV DLLGPSLEDLFNFCSRRTMKT VLMMLADQMSRIEYVHTK NFIHRDIKPD<br/>NFLMGIGRHCNKLFLIDFGLAKKYRDNRT RQHIPPYREDKNLTGTARYASIN AHLGIEQSRDDMESLGYV<br/>LMYFNRTSLPWQGLKAATKKQKYEKISEKKMSTPVEVLCKGFPAEFAMYLNYCRLRFEEAPDYMYLRQL<br/>FRILFRTLNHQDYTFDWTMLKQKAAQQAASSSGQQAQTPTGF</p> <p><b>References to 14-3-3 binding to rat casein kinase I alpha</b><br/>Clokie S, Falconer H, Mackie S, Dubois T, Aitken A. The interaction between casein kinase Ialpha and 14-3-3 is phosphorylation dependent. <i>FEBS J.</i> 2009 Oct 27. [Epub ahead of print]</p>                                                                                                                                                                                                                                                                                                                                                                                                                                                                                                                                                                                                                                                                                                                                                                                                                                                                                                                                                                                                                                     |                                   |
| <p><b>Rat Ankrd6</b> Ankyrin repeat domain 6 (Swissprot = B5DEH9)</p> <p>1 MSQQDAVAAL SERLLIAAYK GQTEENVQLI NKGAKVAVTK HGRTPLHLAA NKGHLSVVQI<br/>61 LLKAGCDLVD QDDGDQTA LH RATVVGNT EI LTALIREGCA LDRQDKDNT ALHEAAWHGF<br/>121 SQSARKLLVKA GANVLARNKA GNTALHLACQ NSHSQSTRVL LGGSRADLK NNAGDTC LHV<br/>181 AARYNHLSVV RLLLSAFCSV HEKNQAGDTA LHVAAALNHK KVVKILLEAG ADTTLVNNAG<br/>241 QTPLEATRYH DNEVALLLT KAPQILRFSR GRSLRKRER LKEERRAQSV PRDEVAQSKG<br/>310 SVSAGDTPSS EQAVPEKEEA RRDCPPASQE PRKDERRRKS RPEVSALSDP TPAADQQPGH<br/>361 QKNLHGHHHQ KKKSRHRCWS PPPPHGFRAY QLYTLYRGED GKVMQAPIKG CRCEPLINKL<br/>421 ENQLEAAVEE LRAELGTVD KVNTKLGHME SKSQHQMVCV DKLMLVERLSA ERTECLNRLQ<br/>481 QHAAAEKQEG EKRQMSLVDE LKSWCMKIQ NLELRLSGES RTFRAKSTPS PSDSSPAVDQ<br/>541 PVVAAGPGAA SDSSQVVRP KDKALNATAV PRHQEELPS DCTGSGLRKV KAPAA SRLGD<br/>601 QQTGSCVNRG TQTKKSARGG QTKHRGQQPT ASSPSGQQPS AASSDARDAS QAELTQYFF<br/>661 EAVSAQMEKW YERKIEEARS QASQKAQQDE ATLKEHIRSL EEEVAKLRTK MHK</p> <p><b>Notes</b><br/>In silico analysis. No experimental data, though suggested site is EPRKDERRRKS RPEVSALSDP Ser 340 (mouse) (714 aa) with six ankyrin (Ank) repeats and two coiled-coil regions.</p> <p><b>References to 14-3-3 binding to rat Ankrd6</b><br/>Kato M, Kato M. Identification and characterization of rat Ankrd6 gene in silico. <i>Int J Mol Med.</i> 2005 Feb;15(2):359-63.</p>                                                                                                                                                                                                                                                                                                                                                                                                                                                                                                                                                                                                                                                                                                                                                                                                                                                                                                                       | NOT IN WEBLOGO                    |
| <p><b>Rat ATP1A1</b> (Na<sup>+</sup>, K<sup>+</sup>-ATPase <math>\alpha</math>1-subunit) (Swissprot = P05023)</p> <p>1 MGKGVGRDKY EPAAVSEQD KKGKKGKDR DMDELKKEVS MDDHKLSLDE LHRKYGTDLS<br/>61 RGLTSARAAE ILARDGPNAL TTPPTPEWI KFCRQLFGGG SMLLWIGAIL CFLAYSIQAA<br/>121 TEEEPQNDNL YLGVVLSAVV IITGCFYSYQ EAKSSKIMES FKNMVPQQAL VIRNGEKMSI<br/>181 NAEVVVVDL VEVKGGDRIP ADLRIISANG CKVDNSSLTG ESEPQTRSPD FTNENPLETR<br/>241 NIAFFSTNCV EGTARGIVVY TGDRTVMGRI ATLASGLEGG QTPIAAEIEH FIHIITGVAV<br/>301 FLVGSFFILS LILEYTWLEA VIFLIGIIVA NVPEGLLATV TVCLTLTAKR MARKNCLVKN<br/>361 LEAVETLGS STICSDKTGT LTQNRMTVAH MWFNDQIHEA DTENQSGVS FDKTSATWLA<br/>421 LSRIAGLCNR AVFQANQENL PILKRAVAGD ASALLKCI ELCCGSVKEM RERYAKIVEI<br/>481 PFNSTNKYQL SIHKNPNTSE PQHLLVMKGA PERILDRCSS ILLHGKEQPL DEELKDAFQN<br/>541 AYLELGLS GE RVLGFCHFLF PDEQFPEGFQ FDTDDVNFPI DNLFCVGLIS MIDPPRAAVP<br/>601 DAVGKCRSAG IKVIMVTGDH PITAKAIAG VGIISEGNET VEDIAARLNI PVSQVNRDA<br/>661 KACVVHGS DL KDMTSEQLDD ILKYHTEIVF ARTSPQQKLI IVEGCQRQGA IVAVTGDGVN<br/>721 DSPALKKADI GVAMGIAGSD VSKQAADMIL LDDNFASIVT GVEEGRILFD NLKKSIAAYTL</p>                                                                                                                                                                                                                                                                                                                                                                                                                                                                                                                                                                                                                                                                                                                                                                                                                                                                                                                                                                                                                                                                                                                                                                                                 | SITES NOT CERTAIN. NOT IN WEBLOGO |

|                                                                                                                                                                                                                                                                                                                                                                                                                                                                                                                                                                                                                                                                                                                                                                                                                                                                                                                                                                                                                                                                                                                                                                                                                                                                                                                                                                                                                                                                                                                                                                                                                                                                                                                                                                                                                                                                                                                                                                                                                                                                                                                                                                                                                                                                                                                                                                                                                                                                                                                                                                                                                                                                                                                                                                                                                                                                                                                                                                                                                                                                                                                            |  |
|----------------------------------------------------------------------------------------------------------------------------------------------------------------------------------------------------------------------------------------------------------------------------------------------------------------------------------------------------------------------------------------------------------------------------------------------------------------------------------------------------------------------------------------------------------------------------------------------------------------------------------------------------------------------------------------------------------------------------------------------------------------------------------------------------------------------------------------------------------------------------------------------------------------------------------------------------------------------------------------------------------------------------------------------------------------------------------------------------------------------------------------------------------------------------------------------------------------------------------------------------------------------------------------------------------------------------------------------------------------------------------------------------------------------------------------------------------------------------------------------------------------------------------------------------------------------------------------------------------------------------------------------------------------------------------------------------------------------------------------------------------------------------------------------------------------------------------------------------------------------------------------------------------------------------------------------------------------------------------------------------------------------------------------------------------------------------------------------------------------------------------------------------------------------------------------------------------------------------------------------------------------------------------------------------------------------------------------------------------------------------------------------------------------------------------------------------------------------------------------------------------------------------------------------------------------------------------------------------------------------------------------------------------------------------------------------------------------------------------------------------------------------------------------------------------------------------------------------------------------------------------------------------------------------------------------------------------------------------------------------------------------------------------------------------------------------------------------------------------------------------|--|
| <p>781 TSNIPFITPF LIFIANIPL PLGTVTILCI DLGTMVPAI SLAYEQAESD IMKRQPRNPK<br/> 841 TDKLVNERLI SMAYQGIGMI QALGGFFTYF VILAENGF LP IHLGLRVDW DDRWINDVED<br/> 901 SYGQWTYEQ RKIVEFCHT AFFVIVVQ WADLVICKTR RNSVFFQGMK NKILIFLGE<br/> 961 ETALAAFLSY CPGMGVALRM YPLKPTWWFC AFPYSLIFV YDEVKLIIR RPPGGWVEKE<br/> 1021 TYY</p> <p>&gt;gi 114374 sp P05023.1 AT1A1_HUMAN RecName: Full=Sodium/potassium-transporting ATPase subunit alpha-1; Short=Sodium pump subunit alpha-1; AltName: Full=Na(+)/K(+) ATPase alpha-1 subunit; Flags: Precursor MGKGVGRDKYEPAAVSEQGDKKGGKGGKDRDMDDELKKEVSMDDHKLSDLDELHRKYGTDLRGLTSARAAILARDGPNALTPPTTPEWIKFCRQLFGGFSMLLWIGAILCFLAYSIQAAATEEEPQNDNLYLGVVLSAVV IITGCFSSYYQEAASSKIMESFKNMVPPQALVIRNGEKMSINAEVAVVVDLVEVKGDDRI PADLRI ISANG CKVDNSSLTGESEPQTRSPDFTNENPLETRNIAFFSTNCVEGTARGIVVYTGDRVTMGRIATLASGLEGG QTPIAAEIEHFIHIITGVAVFLGVFFILSLILEYTWLEAVIFLIGIIVANVPEGLLATVTVCLTLTAKR MARKNCLVKNLEAVETLGTSTICSDKGTGTQNRMTVAHMFWDNQIHEADTENGSGVSDKTSATWLA LSRIALGNRAVFAQNENLPIKRAVAGDASESALLKCIELCCGSVKEMRERYAKIVEIPFNSTNKYQL SIHKNPNTSEPFQHLLVMKGAPEIRILDRCSSILLHGKEQPLDEELKDAFQONAYLELGGGERVLFCHLFL PDEQFPEGFQFDTDVNFPI DNLCFVGLISMIDPPRAAVPDAVGKCRSAGIKVIMVTGDHPITAKAIKGVGI ISEGNETVEDIAARLNIPVSVQVNRDAKACVHGSDLKDMTSEQLDDILKYHTEIVFARTSPQOKLI IVEGCRQGAIVAVTGDGVNDSPALKKADIGVAMGIAGSDVSKQAADMILDDNFASIVTGVEEGRILFD NLKKSIAYTLTNSNIPETIPLFIITANIPLPLGTVTILCIDLGTDMVPAISLAYEQAESD IMKRQPRNPK TDKLVNERLISMAYQGIGMIQALGGFFTYFVILAENGF LP IHLGLRVDWDDRWINDVEDSYGQWTYEQ RKIVEFCHTAFFVIVVQWADLVICKTRRNSVFFQGMKNKILIFGLFEETALAAFLSYCPGMGVALRM YPLKPTWWFCAPFYSLIFVYDEVKLIIRRRPPGGWVEKETYY</p> <p>Human P06685 1 MGKGVGRDKY EPAAVSEQD KKGKGGKDR DMDDELKKEVS MDDHKLSDLDELHRKYGTDLR</p> <p><b>Notes</b><br/> Cannot find the phosphorylated Ser 18 studied by Efendiev et al (2005) in the rat (P05023) or human protein (P06685), appears to be KKGKK.<br/> KKpS<sup>18</sup>KK PP78PTTP Y537LEL</p> <p><b>References to 14-3-3 binding to Na<sup>+</sup>, K<sup>+</sup>-ATPase α1-subunit</b><br/> Efendiev R, Chen Z, Krmar RT, Uhles S, Katz AI, Pedemonte CH, Bertorello AM. The 14-3-3 protein translates the Na<sup>+</sup>,K<sup>+</sup>-ATPase {alpha}1-subunit phosphorylation signal into binding and activation of phosphoinositide 3-kinase during endocytosis. <i>J Biol Chem.</i> 2005 Apr 22;280(16):16272-7.</p>                                                                                                                                                                                                                                                                                                                                                                                                                                                                                                                                                                                                                                                                                                                                                                                |  |
| <p><b>Rat BCAR1 (p130cas) (Crk-associated substrate) (Swissprot = Q63767)</b></p> <p>1 MKYLVSVGAG PARRAGLED VSWGPRVSRP QSYRAARHV NESLPRSAFR VPAAHGASVT<br/> 61 PSAALGSGLP ETQPEAVCRG TEKPRFAEGC KPAASRDKNV LAKALYDNVA ESPDELSFRK<br/> 121 GDIMTVLERD TQGLDGGWLC SLHGRQGI VV GNRLKILVGM YDKKPAAPGP GPPATPPQPQ<br/> 181 PSLPQGVHTP VPPASQYSPM LPTAYQPQPD NVYLVP TSK TQQGLYQAPG PNPQFQSPPA<br/> 241 KQTSTFSKQT PHHSFSPSPAT DLYQVPPGPG SPAQDIYQVP PSAGTGHDIIY QVPPSLDTRS<br/> 301 WEGTKPPAKV VVPTRVGQGY VYEASQAEQD EYDTPRHLLA PGSQDIYDVP PVRGLLPNQY<br/> 361 GQEVYDTPPM AVKGFNGRDP LLDVYDVPPS VEKGLPPSNH HSVYDVPPSV SKDVPDGPLL<br/> 421 REETYDVPPA FAKPKPFDPTRHPLILAAAPP PDSPPAEDVY DVPPPAPDLY DVPPGLRRPG<br/> 481 PGTLYDVPRE RVLPPEVADG SVIDDGVYAV PPAEREAPT DGKRLSASST GSTRSSQSAS<br/> 541 SLEVVPGRE PLELEVAVET LARLQQGVST TVALHLLDLVG SASGGGWR S<sup>592</sup>EPQEPVQ<br/> 601 DLKAAVAHV GAVHELLEFA RSAVSSATHT SDRTLHAKLS RQLQKMEDVY QTLVVHGVVL<br/> 661 DSGRGGPGFT LDDLRLVAC SRAVPEDAKQ LASFLHGNAS LLFRRTKAPG PEGEGSSSLH<br/> 721 LNPTDKASSI QSRPLSPPK FTSQDSPDGO YENSEGWMEDYDVHVLQ GK EEFKTKQKEL<br/> 781 LEKGNIVRQG KGQLELQQLK QFERLEQEVSRPIDHDLANW TPAQPLVPGR TGGGLGSDRQ<br/> 841 LLLFYLEQCE ANLTTLTDAV DAFFTAVATN QPKIFVAHS KVVILSAHKL VFIGDTLSRQ<br/> 901 AKAADVRSKV THYSNLLCDL LRGIVATTKA AALQYPSPSA AQDMVDVKE LGHSTQQFRR<br/> 961 VLGQLAAA</p> <p>&gt;gi 8134344 sp Q63767.1 BCAR1_RAT RecName: Full=Breast cancer anti-estrogen resistance protein 1; AltName: Full=CRK-associated substrate; AltName: Full=p130cas<br/> MKYLVSVGAGPARRAGLEDVSWGPRVSRPQSYRAARHVNESLPRSAFRVPAAHGASVTPSAALGSGLP ETQPEAVCRGTEKPRFAEGCKPAASRDKNVLAKALYDNVAESPDELSFRKGDIMTVLERD TQGLDGGWLC SLHGRQGI VVGNRLKILVGM YDKKPAAPGPPATPPQPQPSLPQGVHTP VPPASQYSPMLPTAYQPQPD NVYLVP TSK TQQGLYQAPG PNPQFQSPPAKQTSTFSKQT PHHSFSPSPATDLYQVPPGPGSPAQDIYQVP PSAGTGHDIIYQVPPSLDTRSWEGTKPPAKV VVPTRVGQGYVYEASQAEQDEYDTPRHLLAPGSQDIYDVP PVRGLLPNQYQEVYDTPPM AVKGFNGRDP LLDVYDVPPSVEKGLPPSNH HSVYDVPPSVSKDVPDGPLL REETYDVPPAFAKPKPFDPTRHPLILAAAPP PDSPPAEDVYDVPPPAPDLYDVPPGLRRPGPTLYDVPRE RVLPPEVADG SVIDDGVYAV PPAEREAPT DGKRLSASSTGSTRSSQSAS SLEVVPGRE PLELEVAVET LARLQQGVST TVALHLLDLVGSASGGGWRSTSEPPVQDLKAAVAHV GAVHELLEFARS AVSSATHT SDRTLHAKLSRQLQKMEDVYQTLVVHGVVLDSGRGGPGFTLDDLRLVAC SRAVPEDAKQLASFLHGNAS LLFRRTKAPG PEGEGSSSLH LNPTDKASSI QSRPLSPPK FTSQDSPDGO YENSEGWMEDYDVHVLQ GK EEFKTKQKEL LEKGNIVRQGGKQLELQQLK QFERLEQEVSRPIDHDLANW TPAQPLVPGRTGGGLGSDRQ LLLFYLEQCEANLTTLTDAV DAFFTAVATN QPKIFVAHS KVVILSAHKL VFIGDTLSRQAKAADVRSKV THYSNLLCDL LRGIVATTKA AALQYPSPSA AQDMVDVKE LGHSTQQFRR VLGQLAAA</p> <p><b>Notes</b><br/> RSTpS<sup>592</sup>EP</p> <p><b>References to 14-3-3 binding to p130cas</b><br/> Garcia-Guzman M, Dolfi F, Russello M, Vuori K. Cell adhesion regulates the interaction between the docking protein p130(Cas) and the 14-3-3 proteins. <i>J Biol Chem.</i> 1999 Feb 26;274(9):5762-8.<br/> Briknarová K, Nasertorabi F, Havert ML, Eggleston E, Hoyt DW, Li C, Olson AJ, Vuori K, Ely KR. The serine-rich domain from Crk-associated substrate (p130cas) is a four-helix bundle. <i>J Biol Chem.</i> 2005 Jun</p> |  |

|                                                                                                                                                                                                                                                                                                                                                                                                                                                                                                                                                                                                                                                                                                                                                                                                                                                                                                                                                                                                                                                                                                                                                                                                                                                                                                                                                                                                                                                                                                                                                                                                                                                                                                                                                                                                                                                                                                                                                                                                                                                                                                                                                                                                                                                                                                                                            |                |
|--------------------------------------------------------------------------------------------------------------------------------------------------------------------------------------------------------------------------------------------------------------------------------------------------------------------------------------------------------------------------------------------------------------------------------------------------------------------------------------------------------------------------------------------------------------------------------------------------------------------------------------------------------------------------------------------------------------------------------------------------------------------------------------------------------------------------------------------------------------------------------------------------------------------------------------------------------------------------------------------------------------------------------------------------------------------------------------------------------------------------------------------------------------------------------------------------------------------------------------------------------------------------------------------------------------------------------------------------------------------------------------------------------------------------------------------------------------------------------------------------------------------------------------------------------------------------------------------------------------------------------------------------------------------------------------------------------------------------------------------------------------------------------------------------------------------------------------------------------------------------------------------------------------------------------------------------------------------------------------------------------------------------------------------------------------------------------------------------------------------------------------------------------------------------------------------------------------------------------------------------------------------------------------------------------------------------------------------|----------------|
| <p>10;280(23):21908-14.</p> <p><b>Rat CaMKK1</b> Calcium/calmodulin-dependent protein kinase kinase 1 (CaMKK) (Swissprot = P97756)</p> <p>1 MERSPAVCCQ DPRAEI LVERV AAISVAHLEE AEEGPEPASNGVDPPPARRAASVIPGSASR<br/> 61 PTPVVRP SLSA RKF LQERPA GSCLEAQVGP YSTGPASHMS PRAWRRPTIE SHHVAISDTE<br/> 121 DCVQLNQYKL QSEIGKGAYG VVRLAYNERE DRHYAMK VLS KKKLLKQYGF PRRPPRGSQ<br/> 181 APQGGPAKQL LPLERVYQEI AILKLDHVN VVKLIEVLDD PAEDNLYLVF DLLRKGPMVE<br/> 241 VPCDKPFPEE QARLYLRDII LGLEYLHCQK IVHRDIKPSN LLLGDDGHVK IADFGVSNQF<br/> 301 EGND AQLSSST AGTPAFMAPE AISDTGQSFS GKALDVWATG VTLYCFVYVK CPFIDEYILA<br/> 361 LHRKIKNEAV VFPEEPEVSE ELKDLILKML DKNPETRIGV SDIKLHPVWT KHGEEPLPSE<br/> 421 EEHCSVVEVT EEEVKNSVKL IPSWTTVILV KSMRLKRSFG NPFEPQARRE ERSMSAPGNL<br/> 481 LLKEGCGEGG KSPPELPGVQE DEAAS</p> <p>&gt;gi 56404324 sp P97756.1 KCC1_RAT RecName: Full=Calcium/calmodulin-dependent protein kinase kinase 1; Short=CaMKK 1; AltName: Full=Calcium/calmodulin-dependent protein kinase kinase alpha; Short=CaM-kinase kinase alpha; Short=CaM-KK alpha; Short=CaMKK alpha; AltName: Full=alpha CaMKK; AltName: Full=CaM-kinase IV kinase</p> <p>MERSPAVCCQ DPRAEI LVERV AAISVAHLEE AEEGPEPASNGVDPPPARRAASVIPGSASRPTFVRP SLSA<br/> RKFSLQERPA GSCLEAQVGP YSTGPASHMS PRAWRRPTIE SHHVAISDTE DCVQLNQYKL QSEIGKGAYG<br/> VVRLAYNERE DRHYAMK VLS KKKLLKQYGF PRRPPRGSQ APQGGPAKQL LPLERVYQEI AILKLDHVN<br/> VVKLIEVLDD PAEDNLYLVF DLLRKGPMVE VPCDKPFPEE QARLYLRDII LGLEYLHCQK IVHRDIKPSN<br/> LLLGDDGHVK IADFGVSNQF EGND AQLSSSTAGTPAFMAPE AISDTGQSFS GKALDVWATGVTLYCFVYVK<br/> CPFIDEYILA LHRKIKNEAV VFPEEPEVSE ELKDLILKML DKNPETRIGV SDIKLHPVWT KHGEEPLPSE<br/> EEHCSVVEVT EEEVKNSVKL IPSWTTVILV KSMRLKRSFG NPFEPQARRE ERSMSAPGNL LLKEGCGEGG<br/> KSPPELPGVQE DEAAS</p> <p><b>Notes</b><br/> RKFpS<sup>74</sup>LQ (CaMKK)</p> <p><b>References to 14-3-3 binding to CaMKK1</b><br/> Davare MA, Saneyoshi T, Guire ES, Nygaard SC, Soderling TR. Inhibition of calcium/calmodulin-dependent protein kinase kinase by protein 14-3-3. <i>J Biol Chem.</i> 2004 Dec 10;279(50):52191-9.</p>                                                                                                                                                                                                                                                   |                |
| <p><b>Rat Chrb4</b> Nicotinic acetylcholine receptor <math>\alpha</math> 4 subunit (AChR<math>\alpha</math>4) (Swissprot = P09483)</p> <p>1 MANS GTGAPP PLLLLPLLLL LGTGLLPASS HIETRAHAE RLLKRLFSGY NKWSRPVANI<br/> 61 SDVVLVRFGL SIAQLIDVDE KNQMMTINVW VKQEWHDYKL RWDPGDYENV TSIRIPSELI<br/> 121 WRPDIVLYNN ADGDFAVTHL TKAHLFYDGR VQWTPPAIYK SSCSIDVTF PFDQONCTMK<br/> 181 FGSWTYDKAK IDLVMHSRV DQLDFWESGE WVI VDAVGTY NTRKYEC CAE IYPDITYAFI<br/> 241 IRRPLFYTYI NLIIPCLLIS CLTVLVFYLP SECGEKVTL C ISVLLSLTVF LLLITEIIPS<br/> 301 P TSLVIPLIG EYLLFTMIFV TLSIVITVFV LNVHHRSPRT HTMPAWVRRV FLDIVRLLF<br/> 361 MKRPSVVKDN CRR LIESMHK MANAPRFWPE PVGEPGILSD ICNQGLSPAP TFCNPTDTAV<br/> 421 ETQPTCRSPP LEV PDLKTSE VEKASPCPSP GSCPPPKSSS GAPMLIKARS LSVQHVPS SQ<br/> 481 EAAEDGIRCR SRSIQYCVSQ DGAASLADSK PTSSPTS LKA RPSQLPVSDQ ASPCKCTCKE<br/> 541 PSPVSPVTVL KAGGTKAPPQ HLP LSPALTR AVEGVQYIAD HLK AEDTDFS VKEDWKYVAM<br/> 601 VIDRIFLW MF IIVCLLGTVG LFLPPWLAAC</p> <p>&gt;gi 8469182 sp P09483.3 ACHA4_RAT RecName: Full=Neuronal acetylcholine receptor subunit alpha-4; Flags: Precursor</p> <p>MANS GTGAPP PLLLLPLLLL LGTGLLPASS HIETRAHAE RLLKRLFSGY NKWSRPVANI SDVVLVRFGL<br/> SIAQLIDVDE KNQMMTINVW VKQEWHDYKL RWDPGDYENV TSIRIPSELI WRPDIVLYNN ADGDFAVTHL<br/> TKAHLFYDGR VQWTPPAIYK SSCSIDVTF PFDQONCTMK FGSWTYDKAK IDLVMHSRV DQLDFWESGE<br/> WVI VDAVGTY NTRKYEC CAE IYPDITYAFI IRRPLFYTYI NLIIPCLLIS CLTVLVFYLP SECGEKVTL C<br/> ISVLLSLTVF LLLITEIIPS TSLVIPLIG EYLLFTMIFV TLSIVITVFV LNVHHRSPRT HTMPAWVRRV<br/> FLDIVRLLFMK RPSVVKDN CRR LIESMHK MANAPRFWPE PVGEPGILSD ICNQGLSPAP TFCNPTDTAV<br/> ETQPTCRSPP LEV PDLKTSE VEKASPCPSP GSCPPPKSSS GAPMLIKARS LSVQHVPS SQ EAAEDGIRCR<br/> SRSIQYCVSQ DGAASLADSK PTSSPTS LKA RPSQLPVSDQ ASPCKCTCKE PSPVSPVTVL KAGGTKAPPQ<br/> HLP LSPALTR AVEGVQYIAD HLK AEDTDFS VKEDWKYVAM VIDRIFLW MF IIVCLLGTVG LFLPPWLAAC</p> <p><b>Notes</b><br/> RSLpS<sup>441</sup>VQ (= Ser472 in P09483)</p> <p><b>References to 14-3-3 binding to nicotinic acetylcholine receptor <math>\alpha</math> 4 subunit</b><br/> Jeanclos EM, Lin L, Treuil MW, Rao J, DeCoster MA, Anand R. The chaperone protein 14-3-3eta interacts with the nicotinic acetylcholine receptor alpha 4 subunit. Evidence for a dynamic role in subunit stabilization. <i>J Biol Chem.</i> 2001 Jul 27;276(30):28281-90.</p> |                |
| <p><b>Rat Huntingtin-associated protein 1 (isoform 1A only)</b><br/> p-HAP1a, CGHPPASGTSYRSSpTL), in which the Thr-598 residue is phosphorylated ?</p> <p><b>References to 14-3-3 binding to HAP1A</b><br/> Rong J, Li S, Sheng G, Wu M, Coblitz B, Li M, Fu H, Li XJ. (2007) 14-3-3 protein interacts with Huntingtin-associated protein 1 and regulates its trafficking. <i>J Biol Chem.</i> 282, 4748-4756.</p>                                                                                                                                                                                                                                                                                                                                                                                                                                                                                                                                                                                                                                                                                                                                                                                                                                                                                                                                                                                                                                                                                                                                                                                                                                                                                                                                                                                                                                                                                                                                                                                                                                                                                                                                                                                                                                                                                                                         | NOT IN WEBLOGO |
| <p><b>Rat MYLK2</b> (Rat myosin light chain kinase 2 (MLCK)) (Swissprot = P20689)</p> <p>1 MATENGA V E L GTQSLSTDHP PTDAAGD GSP ASEKEPSLFD TEKDLGPTNT KKDGPADPK<br/> 61 KNPDP PSLKK TPEAPGPEKK GDSAPASASN QGPGEGDGG GGAEGGTGP PAVLPQPTAT<br/> 121 ADASI QK L DA TQAPSGNQES GEAKAGK KAA ECREAGRGS PAF LHS P S CP AIISCEKTL<br/> 181 LK P L S E T T L I F A G V S E T P D Q D P G P A R D E G G T N T L A D G K E E A E A G Q A E Q A K V Q G D T S Q<br/> 241 R I G F Q A V P S E R A E V G Q A L C L T A K E E D C F Q I L D D C P P P P A P F P H R I V E L R T G N V S S E F S M N<br/> 301 S K E A L G G G K F G A V C T C T E R S T G L K L A A K V I K K Q T P K D R E M V L L E I E V M N Q L N H R N L I Q L Y<br/> 361 S A I E T S H E I I L F M E Y I E G G E L F E R I V D E D Y Q L T E V D T M V F V R Q I C D G I L F M H K M R V L H L D<br/> 421 L K P N I L C V N T T G H L V K I I D F L A R R Y N P N E K L K V N F G T P E F L S P E V V N Y Q D I S D K T D M W<br/> 481 S L G V I T Y M L L S G L S P F L G D D D T E T L N N V L S A N W Y F D E E T F E A V S D E A K D F V S N L I T K D Q S<br/> 541 A R M S A E Q C L A H P W L N N L A E K A K R C N R R L K S Q I L L K K Y L M K R W K K N F I A V S A A N R F K K I S<br/> 601 S S G A L M A L G V</p> <p>&gt;gi 125494 sp P20689.2 MYLK2_RAT RecName: Full=Myosin light chain kinase 2,</p>                                                                                                                                                                                                                                                                                                                                                                                                                                                                                                                                                                                                                                                                                                                                                                                                                                                                                                                                                                 |                |

|                                                                                                                                                                                                                                                                                                                                                                                                                                                                                                                                                                                                                                                                                                                                                                                                                                                                                                                                                                                                                                                                                                                                                                                                                                                                                                                                                                                                                                                                                                                                                                                                                                                                                                                                                                                                                                                                                                                                                                                                                                                                                                                                                                                                                                                                                                           |  |
|-----------------------------------------------------------------------------------------------------------------------------------------------------------------------------------------------------------------------------------------------------------------------------------------------------------------------------------------------------------------------------------------------------------------------------------------------------------------------------------------------------------------------------------------------------------------------------------------------------------------------------------------------------------------------------------------------------------------------------------------------------------------------------------------------------------------------------------------------------------------------------------------------------------------------------------------------------------------------------------------------------------------------------------------------------------------------------------------------------------------------------------------------------------------------------------------------------------------------------------------------------------------------------------------------------------------------------------------------------------------------------------------------------------------------------------------------------------------------------------------------------------------------------------------------------------------------------------------------------------------------------------------------------------------------------------------------------------------------------------------------------------------------------------------------------------------------------------------------------------------------------------------------------------------------------------------------------------------------------------------------------------------------------------------------------------------------------------------------------------------------------------------------------------------------------------------------------------------------------------------------------------------------------------------------------------|--|
| <p>skeletal/cardiac muscle; Short=MLCK2<br/> MATENGAVELGTQSLSTDHPTDAAGDGSASEKEPSLPDTEKDLGPTNTKKDPGAPDPKKNPDPSPSKK<br/> TPEAPGPEKKGDSAPASASQGPSGEGDGGGGPAEGGTGPPAVLPQPTATADASIQLKLDATQAPSGNQES<br/> GEAKAGKAAEACREAGRSGPFLHSPSCPAIISCSEKTLAMKPLSETTELIIFAGVSETPDPQDPGPAKD<br/> EGGTNTLADGKEEAEGQAEQAKVQGDTSQRIGFQAVPSEAEVQALCLTAKEEDCFQIILDDCPPEPPAP<br/> FPHRIVELRTGNVSEFMSNSKEALGGGKFGAVCTCTERSTGLKLAAKVIKKQTPKDKEMVLEIEVMNQ<br/> LNHRNLQLYSAIETSHEIILFMEYIEGGLFERIYDEDEYQLTEVDTMVFVRQICDGIILFMHKMRVLLHD<br/> LKPENILCVNTTGHVVKIIDLGLARRYNPNKLVNFGTPEFLSEPVVNYDQISDKTDMWSLGVITYMLL<br/> SGLSPFLGDDDETETLNNVLSANWYFDEETFEAVSDEAKDFVSNLITKDQSARMSAEQCLAHFWLNNLAEK<br/> AKRCNRRLKSQLLLKYLKRRWKNFIAVSAANRFKISSSGALMALGV</p> <p><b>Notes</b><br/> FLHSP(pS161)CPA in rabbit MLCK phosphorylated by MAPKAP-K2 binds to 14-3-3 (= Ser168 in rat MLCK P206)</p> <p><b>References to 14-3-3 binding to MLCK</b><br/> Haydon CE, Watt PW, Morrice N, Knebel A, Gaestel M, Cohen P. Identification of a phosphorylation site on skeletal muscle myosin light chain kinase that becomes phosphorylated during muscle contraction. Arch Biochem Biophys. 2002 Jan 15;397(2):224-31.</p>                                                                                                                                                                                                                                                                                                                                                                                                                                                                                                                                                                                                                                                                                                                                                                                                                                                                                                                                                                                                                                                                                                                               |  |
| <p><b>Rat Nr4a1(Nur77)</b> Nuclear receptor subfamily 4 group A member 1 (Swissprot = P22829)<br/> 1 MPCIQAYGTPATSPGPRDH LTGDPLALEF SKPTMDLASP ETAPTAPATL PSFSTFMDGG<br/> 61 YTGEFDTFLY QLPGTAQPCS SASSTSSSSS SATSPASAF KFEDFQVYGC YPGTSLGFLD<br/> 121 ETLSSSGSDY YGSPCSAPSP PTPNFQPSQL SPWDGSGFHF SPSQTYEGLR VWTEQLPKAS<br/> 181 GPPPPPTFFS FSPPTGSPS LAQSSCLKFP APATHQLGEG ESYSVPAAFP GLAPTSFNCD<br/> 241 TSGILDAPVT STKARSGSSG GSEGRCAVCG DNASCQHYGV RTCEGCKGFV KRTVQKSAKY<br/> 301 ICLANKDCPV DKRRNRNRCQF CRFQKCLAVG MVKEVVRTD LKGRGRRLP <b>S</b> KPKQPPDASP<br/> 361 NLLTSLIRA HLDSPGNTAK LDYSKFQELV LPRFGKEDAG DVQQFYDLS GSLDVIRKWA<br/> 421 EKIPGFIELS PGDQDLLES AFLELFILRL AYRSKPGEGK LIFCSGLVLH RLQCARGFGD<br/> 481 WIDNILLAFSR SLHSLGVDVP AFACLSALVL ITRHGLQDP RRVEELQNR IASCLKEHMAA<br/> 541 VAGDPQASC LSRLGKLEPE LRTLCTQGLQ RIFCLKLEDL VPPPIVDKI FMDTSLF</p> <p>&gt;gi 1709263 sp P22829.2 NR4A1_RAT RecName: Full=Nuclear receptor subfamily 4 group A member 1; AltName: Full=Orphan nuclear receptor HMR; AltName: Full=Nerve growth factor-induced protein I-B; Short=NGFI-B; AltName: Full=NUR77</p> <p>MPCIQAYGTPATSPGPRDHLTGDPLALEFSKPTMDLASEPETAPTAPATLPSFSTFMDGGYTGEFDTFLY<br/> QLPGTAQPCSSASSTSSSSSSSATSPASAFKFEDFQVYGCYPGTSLGFLDETLLSSSGSDYYGSPCSAPSP<br/> PTPNFQPSQLSPWDGSGFHFSPSQTIEGLRVWTEQLPKASGPPPPPTFFSFPPTGSPSLAQSSCLKFP<br/> APATHQLGEGESYSVPAAFPGLAPTSFNCDTSGILDAPVTSTKARSGSSGGSEGRCAVCGDNASCQHYGV<br/> RTCEGCKGFKRTVQKSAKYICLANKDCPVDKRRNRNRCQFCRFQKCLAVGMVKEVVRTDLSLKGRRRLP<br/> KPKQPPDASPTNLLTSLIRAHLDSPGNTAKLDYSKFQELVLPFRFGKEDAGDVQQFYDLSGSLDVIRKWA<br/> EKIPGFIELSPGDQDLLESFALELFILRLAYRSKPGEGKLI FCSGLVLHRLQCARGFGDWIDNILLAFSR<br/> SLHSLGVDVPAFACLSALVLITDRHGLQDPRRVEELQNR IASCLKEHMAAVAGDPQASCLSRLLGKLEPE<br/> LRTLCTQGLQRIFCLKLEDLVPPPIVDKIFMDTSLF</p> <p><b>Notes</b><br/> VRTDSLKGRRLP(pS350)KPKQP (conserved in human and mouse sequences)</p> <p><b>References to 14-3-3 binding to Nur77</b><br/> Wingate AD, Campbell DG, Peggie M, Arthur JS. Nur77 is phosphorylated in cells by RSK in response to mitogenic stimulation. Biochem J. 2006 Feb 1;393(Pt 3):715-24.<br/> Masuyama N, Oishi K, Mori Y, Ueno T, Takahama Y, Gotoh Y. Akt inhibits the orphan nuclear receptor Nur77 and T-cell apoptosis. J Biol Chem. 2001 Aug 31;276(35):32799-805.</p> |  |
| <p><b>Rat NUMB</b> (Swissprot = Q3MUI1)<br/> 1 MNKLRQSFRR KKDYYVPEAS RPHQWQTDDEE GVRTGKCSFP VKYLGHVEVD ESRGMHICED<br/> 61 AVKRLKATGK KAVKAVLWVS ADGLRVVDEK TKDLIVDQTI EKVSFCAPDR NFDRAFSYIC<br/> 121 RDGTTRRWIC HCFMAVKDTG ERLSHAVGCA FAACLERKQK REKECGVTAT FDSRRTTFTR<br/> 181 EGSFRVTTAT EQAEREEIMK QLQDAKKAET DKTGVPVAP GNSAPSPSSP TSPTLDPTAS<br/> 241 LEMNPHAIIP RRHAPIEQLA RQGSFRGFPA LSQKMSPFKR <b>QL</b>SLRINELP STMQRKTDFP<br/> 301 IKNTVPEVEG EAESISSLCS QITSAFSTPC EDPFSSAPMT KPVTLVAPQS PVLQGTIEWGQ<br/> 361 SSGAASPGFL QAGHRRTPSE ADRWLEEVSK SVRAQQPQAS AAPLQPVLPQ PPPAAIAPPA<br/> 421 PPFQGHAFLLT SQPVVGVVPLQPAFVSTQ SYPVANGMPY PASNVVVGITPSQMVANVF<br/> 481 GTAGHPQATH PHQSPSLAKQ QTFFQYETSS ATTSPPFFKPS AQHLNGSAAF NGVDNSGLVS<br/> 541 GNRPAQVPPG TCPVDPFEAQ WAALESKPKQ RTNPSPTNPF SDAQAQAFEI</p> <p>&gt;gi 123786330 sp Q3MUI1 Q3MUI1_RAT Numb<br/> MNKLRQSFRRKKDYYVPEASRPHQWQTDDEEGVRTGKCSFPVKYLGHVEVDESARGMHICEDAVKRLKATGK<br/> KAVKAVLWVSADGLRVVDEKTKDLIVDQTIKVSFCAPDRNFDRAFSYICRDGTTRRWICHCMAVKDTG<br/> ERLSHAVGCAFAACLERKQKREKECGVTATFDSRRTTFTRREGSFRVTTATQAEREEIMKQLQDAKKAET<br/> DKTVGVPVAPGNSAPSPSSPTSPDLPTASLEMNPHAIIPRRHAPIEQLARQGSFRGFPAALSQKMSPFKR<br/> QLSLRINELPSTMQRKTDFPIKNTVPEVEGEAEESISSLCSQITSAFSTPCEDPFSSAPMTKPVTLVAPQS<br/> PVLQGTIEWGQSSGAASPGFLQAGHRRTPSEADRWLEEVSKSVRAQQPQASAAPLQPVLPQPPAAIAPPA<br/> PPFQGHAFLLT SQPVVGVVPLQPAFVSTQSYPVANGMPYPASNVVVGITPSQMVANVFAGTAGHPQATH<br/> PHQSPSLAKQQTFFQYETSSATTSPPFFKPSAQHLNGSAAFNGVDNSGLVSGNRPAQVPPGTCVPDPFEAQ<br/> WAALESKPKQRTNPSPTNPFSSDAQAQAFIEI</p> <p><b>References to 14-3-3 binding (see NUMBL)</b></p>                                                                                                                                                                                                                                                                                                                                                                                                                                                                                                                                                                                                                                                                                                         |  |
| <p><b>Rat NUMBL</b> Numbl-like (Swissprot = Q3MUI2)<br/> 1 MSRSAAASGG PRRPDQHLPP APCGASGPE TFRTESDGAG TMNKLQSLR RRPAYVPEA<br/> 61 SRPHQWQADE DAVRKGTCSE PVRYLGHVEV EESRGMHVCE DAVKKLKAMG RKSVKSVLWV<br/> 121 SADGLRVVDD KTKDLLVDQT IEKVSFCAPD RNLDKAFSYI CRDGTTRRWI CHCFLALKDS<br/> 181 GERLSHAVGC AFAACLERKQ RREKECGVTA AFDASRTSFA REGSFRLSGG GRPAEREAGD<br/> 241 KKKEAAAAPA VAPGPAQPGH VSPPTATTSP GEKGEAGTPV AAGTAAAIIP RRHAPLEQLV</p>                                                                                                                                                                                                                                                                                                                                                                                                                                                                                                                                                                                                                                                                                                                                                                                                                                                                                                                                                                                                                                                                                                                                                                                                                                                                                                                                                                                                                                                                                                                                                                                                                                                                                                                                                                                                                                                                  |  |

|                                                                                                                                                                                                                                                                                                                                                                                                                                                                                                                                                                                                                                                                                                                                                                                                                                                                                                                                                                                                                                                                                                                                                                                                                                                                                                                                                                                                                                                                                                                                                                                                                                                                                                                                                                                                                                                                                                                                                                                                                                                                                                                                                                                                                                                                                                                                                                                                                                                                                                                                                                                                                                                                                                                                                                                                                                                                                                                                                                                                                                                                                                                                                                                                                                                                                                                                                                                                                                                                                                                                                                               |  |
|-------------------------------------------------------------------------------------------------------------------------------------------------------------------------------------------------------------------------------------------------------------------------------------------------------------------------------------------------------------------------------------------------------------------------------------------------------------------------------------------------------------------------------------------------------------------------------------------------------------------------------------------------------------------------------------------------------------------------------------------------------------------------------------------------------------------------------------------------------------------------------------------------------------------------------------------------------------------------------------------------------------------------------------------------------------------------------------------------------------------------------------------------------------------------------------------------------------------------------------------------------------------------------------------------------------------------------------------------------------------------------------------------------------------------------------------------------------------------------------------------------------------------------------------------------------------------------------------------------------------------------------------------------------------------------------------------------------------------------------------------------------------------------------------------------------------------------------------------------------------------------------------------------------------------------------------------------------------------------------------------------------------------------------------------------------------------------------------------------------------------------------------------------------------------------------------------------------------------------------------------------------------------------------------------------------------------------------------------------------------------------------------------------------------------------------------------------------------------------------------------------------------------------------------------------------------------------------------------------------------------------------------------------------------------------------------------------------------------------------------------------------------------------------------------------------------------------------------------------------------------------------------------------------------------------------------------------------------------------------------------------------------------------------------------------------------------------------------------------------------------------------------------------------------------------------------------------------------------------------------------------------------------------------------------------------------------------------------------------------------------------------------------------------------------------------------------------------------------------------------------------------------------------------------------------------------------------|--|
| <p>301 RQGSFRGFPA LSQKNSPFKR QLSLRLNELP STLQRRTDFQ VKGTVPEMEP PGTGSDSGIS<br/> 361 ALCTQISSSF ASAGAPVPGP PSATTGTSAW GEPSVPAATA FQPGHKRTPS EAERWLEEV<br/> 421 QVAKAQVQQQ QQQQQQQQQQ QQQQQQQQQQ QQQQATSVFP MPTMAPLQP FSAPVGFDDT<br/> 481 AAAQVAVFLP PTHMQPPFVP AYPGLGYPPM PRVPVVGITP SQMVANAFCS AAQLQPQFAT<br/> 541 LLGKAGAFPP PTAPSAPGGQ ARPRPNGAPW PPEFAPAPAP ELDPFEAQWA ALEGKPAVEK<br/> 601 PSNPFSGDLQ KTFEIEL</p> <p>&gt;gi 123789641 sp Q3MUI2 Q3MUI2_RAT Numb-like<br/> MSR5AAASGGPRRPDQHLPPAPCGASGPPETFRTESDGAGTMNKLRQSLRRRKPAYVPEASRPHQWQADE<br/> DAVRKGTCSFPVRYLGHVEVEESRGMHVCEDAVKKLKAMGRKSVKSVLWVSADGLRVVDDKTKDLLVDQT<br/> IEKVSFCAPDRNLDKAFSYICRDGTTRRWICHCFALAKDSGERLSHAVGCFAAACLERKQRREKECGVTA<br/> AFDASRTSFAREGSFRLEGGGRPAEREAGDKKKEAAAAAPAVGPAQPGHVSPTPATTSPGKGEAGTVPV<br/> AAGTAAAI PRRHAPLEQLVRQGSFRGFPALSQKNSPFKRQLSLRLNELPSTLQRRTDFQVKGTVPEMEP<br/> PGTGSDSGISALCTQISSSFASAGAPVPGPPSATTGTSAWGEPSVPAATAFQPGHKRTPSEAERWLEEV<br/> QVAKAQVAVFLP PTHMQPPFVP AYPGLGYPPM PRVPVVGITP SQMVANAFCSAAQLQPQFATLLGKAGAFPPPTAPSAPGGQ<br/> ARPRPNGAPWPEFAPAPAPPELDPFEAQWAALLEGKPAVEKPSNPFSGDLQKTFEIEL</p> <p><b>Notes</b><br/> Numb and Numbl were efficiently and stoichiometrically phosphorylated in vitro at equivalent Ser residues<br/> (Ser264 in Numb and Ser304 in Numbl) by activated CaM-KI and also by two other CaM-Ks (CaM-KII and CaM-<br/> KIV). Recruitment of 14-3-3 proteins was the functional consequence of the phosphorylation of the Numb family<br/> proteins. Interaction of 14-3-3 protein with phosphorylated Numbl-blocked dephosphorylation of Ser304.</p> <p><b>References to 14-3-3 binding to Numb</b><br/> Tokumitsu H, Hatano N, Inuzuka H, Sueyoshi Y, Yokokura S, Ichimura T, Nozaki N, Kobayashi R.<br/> Phosphorylation of Numb family proteins. Possible involvement of Ca<sup>2+</sup>/calmodulin-dependent protein kinases. <i>J<br/> Biol Chem.</i> 2005 Oct 21;280(42):35108-18.<br/> Tokumitsu H, Hatano N, Yokokura S, Sueyoshi Y, Nozaki N, Kobayashi R. Phosphorylation of Numb regulates its<br/> interaction with the clathrin-associated adaptor AP-2. <i>FEBS Lett.</i> 2006 Oct 16;580(24):5797-801</p>                                                                                                                                                                                                                                                                                                                                                                                                                                                                                                                                                                                                                                                                                                                                                                                                                                                                                                                                                                                                                                                                                                                                                                                                                                                                                                                                                                                                                |  |
| <p><b>Rat RPS6KA1 Ribosomal S6 kinase 1 (p90RSK1) (Swissprot = Q63531)</b></p> <p>1 MPLAQLKEPW PLMELVPLDP ENGQASGEEA GLQPSKDEGI LKEISITHHV KAGSEKADPS<br/> 61 HFELLKVLGQ GSFQKVFVLR KVTRPDNGHL YAMKVLKAT LKVRDRVRTK MERDILADVN<br/> 121 HPFVVKLHYA FQTEGKLYLI LDFLRGGDLF TRLSKEVMFT EEDVKFYLAELALGLDHLHS<br/> 181 LGIIYRDLKP ENILLDEEGH IKLTDGFLSK EADHEKKAY SFCGTVEYMA PEVVRNQGHT<br/> 241 HSADWWSYGV LMFEMLTGSL PFQKDRKET MTLILKAKLG MPQFLSTEAQ SLLRALFKRN<br/> 301 PANRLGSGPD GAEEIKRHIF YSTIDWNKLY RREIKPPFKP AVAQPDFTFY FDTEFTSRTP<br/> 361 RDSPIPPSA GAHQLFGRFS FVATGLMEDD SKPRATQAPL HSVVQQLHGK NLVFSQGYIV<br/> 421 KETIGVGSYS VCKRCVHKAT NMEYAVKVID KSKRDPSEEI EILLRYGQHP NIITLKDVID<br/> 481 DSKHVVYLVTE LMRGGELLDK ILRQKFFSER EASFVLYTIS KTVEYLHSQG VVHRDLKPSN<br/> 541 ILYVDESNGP ECLRICDFGF AKQLRAENGL LMTPCYTANF VAPEVLKRQG YDEGCDIWSL<br/> 601 GVLLYTMLAG YTPFANGPSD TPEEILTRIS SGKFTLSGGN WNTVSETAKD LVSKMLHVDP<br/> 661 HQRLTAKQVL QHPWITQKDK LPQSQLSHQD LQLVKGGMMA TYSALSSSKP TPQLKPIESS<br/> 721 ILAQRVRKLP PSTTL</p> <p>&gt;gi 11132671 sp Q63531.1 KS6A1_RAT RecName: Full=Ribosomal protein S6 kinase<br/> alpha-1; Short=S6K-alpha 1; AltName: Full=90 kDa ribosomal protein S6 kinase<br/> 1; AltName: Full=p90-RSK 1; AltName: Full=Ribosomal S6 kinase 1; Short=RSK-1;<br/> AltName: Full=pp90RSK1; AltName: Full=p90S6K; AltName: Full=MAP kinase-<br/> activated protein kinase 1a; Short=MAPKAPK1A</p> <p>MPLAQLKEPWPLMELVPLDPENGQASGEEAGLQPSKDEGILKEISITHHVKAGSEKADPSHFELLKVLGQ<br/> GSFQKVFVLRKVTTRPDNGHLYAMKVLKATLKVDRVRTKMERDILADVNHPFVVKLHYAFQTEGKLYLI<br/> LDFLRGGDLFTRLSKEVMFT EEDVKFYLAELALGLDHLHSLGIIYRDLKPENILLDEEGHIKLTDFGLSK<br/> EADHEKKAYSFCGTVEYMAPEVVRNQGHTHSADWWSYGVLMFEMLTGSLPFQKDRKETMTLILKAKLG<br/> MPQFLSTEAQSLLRALFKRN PANRLGSGPDGAEEIKRHIFYSTIDWNKLYRREIKPPFKP AVAQPDFTFY<br/> FDTEFTSRTPRDSPIPPSAGAHQLFGRFSFVATGLMEDD SKPRATQAPLHSVQQLHGKNLVFSQGYIV<br/> KETIGVGSYSVCKRCVHKATNMEYAVKVIDKSKRDPSEEIEILLRYGQHPNIITLKDVIDDSSKHVVYLVTE<br/> LMRGGELLDKILRQKFFSER EASFVLYTISKTVEYLHSQGVVHRDLKPSN ILYVDESNGPECLRICDFGF<br/> AKQLRAENGLLMTPCYTANFVAPEVLKRQGYDEGCDIWSLGVLLYTMLAGYTPFANGPSDTPEEILTRIS<br/> SGKFTLSGGN WNTVSETAKDLVSKMLHVDPHQRLTAKQVLPQSQLSHQDLQLVKGMMA<br/> TYSALSSSKPTPQLKPIESSILAQRVRKLPSTTL</p> <p><b>Notes</b><br/> p90RSK an AGC kinase of the RSK family. Phosphorylated and activated by Erk1 and -2 in response to many<br/> growth factors, polypeptide hormones and neurotransmitters. Several phosphorylation sites are important for its<br/> activation. Possesses two kinase domains connected by a regulator linker region. Phosphorylates a wide range of<br/> substrates including ribosomal protein S6. Prominently expressed in brain structures essential for cognitive<br/> function and learning. RSK1 specifically and directly binds 14-3-3beta. This interaction was dependent on<br/> phosphorylation of serine 154 within the motif RLSKEV of RSK1. Binding of RSK1 to 14-3-3beta was maximal<br/> under basal conditions and decreased significantly upon mitogen stimulation. 14-3-3beta binding negatively<br/> regulates RSK1 activity to maintain signal specificity and that association/dissociation of the 14-3-3beta-RSK1<br/> complex is likely to be important for mitogen-mediated RSK1 activation.</p> <p><b>References to 14-3-3 binding to RPS6KA1</b><br/> Cavet ME, Lehoux S, Berk BC. 14-3-3beta is a p90 ribosomal S6 kinase (RSK) isoform 1-binding protein that<br/> negatively regulates RSK kinase activity. <i>J Biol Chem.</i> 2003 May 16;278(20):18376-83</p> |  |
| <p><b>Rat TESK1 human testicular protein kinase 1 (a TKL kinase of the LISK family. (Rattus norvegicus D50864.1)</b></p> <p>1 MAGERPPLRG PGPGETPVEG PGGAGGGPGR GRPSSYRALR SAVSSLARVD DFDCAEKIGA<br/> 61 GFFSEVYKVR HRQSGQVMVL KMKNLPSNRS NTLREVQLMN RLRHPNILRF MGVCVHQGQL<br/> 121 HALTEYMNGG TLEQLSSPE PLSWPVRLHL ALDIAQGLRY LHAKGVFHRD LTSKNCLVRR<br/> 181 EDGGFTAVVG DFGLAEKIPV YREGARKEPL AVVGSPLYMA PEVLRGELYD EKADVFVAFGI<br/> 241 VLCELIARVP ADPDYLPSTE DFGLDVPAFR TLVGNDCPLP FLLLAIHCCS MEPSARAFPT</p>                                                                                                                                                                                                                                                                                                                                                                                                                                                                                                                                                                                                                                                                                                                                                                                                                                                                                                                                                                                                                                                                                                                                                                                                                                                                                                                                                                                                                                                                                                                                                                                                                                                                                                                                                                                                                                                                                                                                                                                                                                                                                                                                                                                                                                                                                                                                                                                                                                                                                                                                                                                                                                                                                                                                                                                                                                                                                                                                                                                                                                                                |  |

|     |            |            |            |            |            |            |
|-----|------------|------------|------------|------------|------------|------------|
| 301 | EITQHLEQIL | EQLPEPTPLA | KMPLAKAPLT | YNQGSVPRGG | PSATLPRSDP | RLSRSRSDLF |
| 361 | LPPSPESPSP | WGNLNRVNP  | FSLREDLRGG | KIKLLDTPCK | PATPLPLVPP | SPLTSTQLPL |
| 421 | VASPESLVQP | ETPVRRCRSL | PSSPELPRRM | ETALPGPGFS | PVGPSTEERM | DCEGSSPEPE |
| 481 | PPGPAPQLPL | AVATDNFIST | CSSASQPWSA | RPGPSLNNNP | PAVVVNSPQG | WAREPWNRAQ |
| 541 | HSLPRAAALE | RTEPSPPPSA | PREQEGLPC  | PGCLSPFSF  | GFLSMCPRPT | PAVARYRNLN |
| 601 | CEAGSLLCHR | GHHAKPPTPS | LQLPGARS   |            |            |            |

**Notes**  
TESK1 a TKL kinase of the LISK family. Its testicular germ cell-specific expression and developmental pattern of expression in the mouse suggests that this kinase plays an important role at and after the meiotic phase of spermatogenesis. 14-3-3beta interacts with TESK1 through the C-terminal region of TESK1 and in a manner dependent on the phosphorylation of Ser439 within an RXXSXP motif. Binding of 14-3-3beta inhibited the kinase activity of TESK1.

**References to 14-3-3 binding to TESK1**  
Toshima JY, Toshima J, Watanabe T, Mizuno K. Binding of 14-3-3beta regulates the kinase activity and subcellular localization of testicular protein kinase 1. *J Biol Chem.* 2001 Nov 16;276(46):43471-81

|                                                                                                              |            |            |             |            |            |            |
|--------------------------------------------------------------------------------------------------------------|------------|------------|-------------|------------|------------|------------|
| <b>B. Non-mammalian animal proteins reported to interact directly with 14-3-3</b>                            |            |            |             |            |            |            |
| <b>Ancylostoma caninum DAF-16</b> (Dog hookworm DAF16; a forkhead transcription factor) (Swissprot = B3G3K1) |            |            |             |            |            |            |
| 1                                                                                                            | MSNHLSTQTC | LPPQLPTFGV | VPLPSFQPQC  | YISTSSSILP | PGPPYPSLNT | TSPSSDSLFS |
| 61                                                                                                           | VSTSLNSLSP | ECPRRSDLD  | LKMETPDGDD  | GDDFFDLEKH | QKARSAFPG  | STQYSSQLAI |
| 121                                                                                                          | ARHGLFAPSL | DTIGSVASGL | YDSAENLNSR  | LGATSVASSG | ALLHSPDGNN | TFSPSSCNMS |
| 181                                                                                                          | SPVMNDQLAP | AGATDAGDGV | AGAGAACKST  | TRRNAWGNLS | YADLITQAIM | QSPKRLTLS  |
| 241                                                                                                          | QVYEWVQNV  | PYFRDKGDSN | SSAGWKN SIR | HNLSLHSRFM | RIQNEGAGKS | SWVWVINDAK |
| 301                                                                                                          | PGRNPRRVR  | SLDITTSKAT | LSKLLKGARK  | RIHDIRAVSG | LHSGVSSLAG | SQASIMSHDI |
| 361                                                                                                          | YGDEEAMQAS | FDPMFRPRTQ | SNLSVPGSST  | RVSPSMEHPF | DDFEFSPSVN | DATAASAAAN |
| 421                                                                                                          | AAANAANHTG | AAPIPTDILD | RTDQMRIDSC  | RIMMNGVKQE | PKPIKTESPV | APPPSYLELS |
| 481                                                                                                          | SVRNQSQLQN | PLLRTQLASV | KFPTAGLPLP  | YQTYSPWPTH | TPLLPPSSCA | AVAQANSVAA |
| 541                                                                                                          | AAALPSDLES | LTLPDQPLMD | FEVESLLRHE  | LSQTTDHRLN | FDNL       |            |

**Notes**  
Ac-FTT-2 was expressed in HEK 293T cells, and was recognized by an antibody against human 14-3-3beta isoform. Reciprocal co-immunoprecipitations using anti-epitope tag antibodies indicated that Ac-FTT-2 (14-3-3) interacts with Ac-DAF-16 when co-expressed in serum-stimulated HEK 293T cells. This interaction requires intact Akt consensus phosphorylation sites at serine107 and threonine312, but not serine381.

**References to 14-3-3 binding to dog hookworm DAF16**  
Kiss JE, Gao X, Krepp JM, Hawdon JM. Interaction of hookworm 14-3-3 with the forkhead transcription factor DAF-16 requires intact Akt phosphorylation sites. *Parasit Vectors.* 2009 Apr 24;2(1):21.

|                                                                                                                  |             |             |            |            |             |                       |
|------------------------------------------------------------------------------------------------------------------|-------------|-------------|------------|------------|-------------|-----------------------|
| <b>Caenorhabditis elegans DAF-16</b> (Dauer formation protein 16) Forkhead box protein O (AAC47803.1 GI:2623943) |             |             |            |            |             |                       |
| 1                                                                                                                | MMEMLVDDQGT | DASSASTST   | SSVSRFGADT | FMNTPDDVMM | NDDMEIPRD   | RCNFWPMRRP            |
| 61                                                                                                               | QLEPLNNSP   | IIHEQIPEED  | ADLYGSNEQC | GQLGGASSNG | STAMLHTPDG  | SNSHQTSFSP            |
| 121                                                                                                              | DFRMSESPDD  | TVSGKKTTR   | RNAWGNMSYA | ELITTAIMAS | PEKRLTLAQV  | YEWVQNVVY             |
| 181                                                                                                              | FRDKGDSNSS  | AGWKN SIRHN | LSLHSRFMRI | QNEGAGKSSW | WVINPDAPG   | RNPRTRERS             |
| 241                                                                                                              | NIETTTKAQ   | LEKSRGAKK   | RIKERALMGS | LHSTLNGNSI | AGSIQTISHD  | LYDDDSMQGA            |
| 301                                                                                                              | FDNVPSFRP   | RTQSNLSIPG  | SSSRVSPAIG | SDIYDDLEFP | SWVGESVPAI  | PSDIVDRTDQ            |
| 361                                                                                                              | MRIDATTHIG  | GVQIKQESKP  | IKTEPIAPP  | SYHELNSVRG | SCAQNP LLRN | PIVPSTNFKP            |
| 421                                                                                                              | MPLPGAYGNY  | QNGGITPINW  | LSTSNSSPLP | GIQSCGIVAA | QHTVASSSAL  | PIDLENLTLPLDQPLMDTMDV |
| 481                                                                                                              | DQPLMDTMDV  | DALIRHELSD  | AGGQHIHFDL |            |             |                       |

>gi|2623943|gb|AAC47803.1| DAF-16 [Caenorhabditis elegans]  
MMEMLVDDQGT DASSASTST SSVSRFGADT FMNTPDDVMM NDDMEIPRD RCNFWPMRRP QLEPLNNSP  
IIHEQIPEED ADLYGSNEQC GQLGGASSNG STAMLHTPDG SNSHQTSFSP DFRMSESPDD TVSGKKTTR  
RNAWGNMSY AELITTAIMAS PEKRLTLAQV YEWVQNVVY FRDKGDSNSSAGWKN SIRHNLSLHSRFMRI  
QNEGAGKSSW VINPDAPGRNPRTRERSNTIETTTKAQLEKSRGAKKRIKERALMGS LHSTLNGNSI  
AGSIQTISHDLYDDDSMQGA FDNVPSFRPRTQSNLSIPGSSSRVSPAIGSDIYDDLEFP SWVGESVPAI  
PSDIVDRTDQMRI DATTHIGGVQIKQESKPIKTEPIAPP SYHELNSVRG SCAQNP LLRNPIVPSTNFKP  
MPLPGAYGNY QNGGITPINW LSTSNSSPLPGI QSCGIVAA QHTVASSSAL PIDLENLTLPLDQPLMDTMDV  
DALIRHELSDAGGQHIHFDL

**References to 14-3-3 binding to Caenorhabditis elegans DAF-16**  
RdRCN(pT)WP RTRE(S)N(T)IE (not certain whether Ser240 and/or Ser242 is the 14-3-3-binding site)  
Araiz C, Château MT, Galas S. 14-3-3 regulates life span by both DAF-16-dependent and -independent mechanisms in *Caenorhabditis elegans*. *Exp Gerontol.* 2008 Jun;43(6):505-19.  
Li J, Tewari M, Vidal M, Lee SS. The 14-3-3 protein FTT-2 regulates DAF-16 in *Caenorhabditis elegans*. *Dev Biol.* 2007 Jan 1;301(1):82-91.  
Wang Y, Oh SW, Deplancke B, Luo J, Walhout AJ, Tissenbaum HA. *C. elegans* 14-3-3 proteins regulate life span and interact with SIR-2.1 and DAF-16/FOXO. *Mech Ageing Dev.* 2006 Sep;127(9):741-7.  
Lehtinen MK, Yuan Z, Boag PR, Yang Y, Villén J, Becker EB, DiBacco S, de la Iglesia N, Gygi S, Blackwell TK, Bonni A. A conserved MST-FOXO signaling pathway mediates oxidative-stress responses and extends life span. *Cell.* 2006 Jun 2;125(5):987-1001.  
Cahill CM, Tzivion G, Nasrin N, Ogg S, Dore J, Ruvkun G, Alexander-Bridges M. Phosphatidylinositol 3-kinase signaling inhibits DAF-16 DNA binding and function via 14-3-3-dependent and 14-3-3-independent pathways. *J Biol Chem.* 2001 Apr 20;276(16):13402-10.

ONLY  
pTHR54 IN  
WEBLOGO.

|                                                                                                   |            |            |            |            |            |             |
|---------------------------------------------------------------------------------------------------|------------|------------|------------|------------|------------|-------------|
| <b>Dictyostelium AX4</b> Ankyrin repeat-containing protein tyrosine kinase A (Swissprot = Q54HC6) |            |            |            |            |            |             |
| 1                                                                                                 | MSIKLPLSNI | NSGGNSNNSS | SSNSTSNNNI | NININGIPT  | NIEKMTFEDS | ETQKLNLIKQQ |
| 61                                                                                                | NNNTSTSTVC | VSSIHSSSPI | SSPSTHQVVK | SSGSLPPVIK | RSPTTTHHHN | SSGSNSSSSS  |
| 121                                                                                               | SGSNNNNNQI | KTSNGMKNPN | PTGFLFGSKP | RENSQNKIDD | NKGVNLAVST | SNSSNNFHKS  |
| 181                                                                                               | HSESNININ  | APPVETVME  | EIYNNIPSSI | SMENIRENEN | NNNSNNNSN  | NNNNNNNNNN  |





|                                                                                                                                                                                                                                                                                                                                                                                                                                                                                                                                                                                                                                                                                                                                                                                                                                                                                                                                                                                                                                                                                                                                                                                                                                                                                                                                                                                                                                                                                                                                                                                                                                                                                                                                                                                                                                                                                                                                                                                                                                                                                                                                                               |  |
|---------------------------------------------------------------------------------------------------------------------------------------------------------------------------------------------------------------------------------------------------------------------------------------------------------------------------------------------------------------------------------------------------------------------------------------------------------------------------------------------------------------------------------------------------------------------------------------------------------------------------------------------------------------------------------------------------------------------------------------------------------------------------------------------------------------------------------------------------------------------------------------------------------------------------------------------------------------------------------------------------------------------------------------------------------------------------------------------------------------------------------------------------------------------------------------------------------------------------------------------------------------------------------------------------------------------------------------------------------------------------------------------------------------------------------------------------------------------------------------------------------------------------------------------------------------------------------------------------------------------------------------------------------------------------------------------------------------------------------------------------------------------------------------------------------------------------------------------------------------------------------------------------------------------------------------------------------------------------------------------------------------------------------------------------------------------------------------------------------------------------------------------------------------|--|
| <p><b>References to 14-3-3 binding to Drosophila FOXO</b><br/>Nielsen MD, Luo X, Biteau B, Syverson K, Jasper H. 14-3-3 Epsilon antagonizes FoxO to control growth, apoptosis and longevity in <i>Drosophila</i>. <i>Aging Cell</i>. 2008 Oct;7(5):688-99.</p>                                                                                                                                                                                                                                                                                                                                                                                                                                                                                                                                                                                                                                                                                                                                                                                                                                                                                                                                                                                                                                                                                                                                                                                                                                                                                                                                                                                                                                                                                                                                                                                                                                                                                                                                                                                                                                                                                                |  |
| <p><b>Drosophila Yki</b> (Yorkie) <i>Drosophila</i> transcriptional activator related to Yap (Swissprot = Q0E8X1)<br/> 1 MLTTSASSN TNSLIEKEID DEDMLSPIKS NNLVVRVQD TDDNLQALFD SVLNPGDAKR<br/> 61 PLQLPLRMRK LPNSFFTPPA PSHSRANSAD STYDAGSQSS INIGNKASIV QQPDDGQSPIA<br/> 121 AIPQLQIQPS PQHSRLAIHH SRARSPASL QQYNVNRARS DAAAANNPNA NPSSQQQFAG<br/> 181 PTFPENSAQE FPSGAPASSA IDLDAMNTCM SQDIPMSMQT VHKKQRSYDV ISPIQLNRQL<br/> 241 GALPPGWEQA KTNDGQIYYL NHTTKSTQWE DPRIQYRQQQ QILMAERIKQ NDVLQTTKQT<br/> 301 TTSTIANNLG PLPDGWEQAV TESGDLYFIN HIDRTTSWND PRMQSGLSVL DCPDNLVSSL<br/> 361 QIEDNLCSNL FNDAQAIVNP PSSHKPDdle WYKIN</p> <p><b>Notes</b><br/>Yorkie phosphorylation at S168, which is critical for 14-3-3 binding. Two other sites are also phosphorylated (SHSRANSADST) and VHKKQRsYDVI) (Badouel et al 2009). Ser145 in Q0E8X1 is equivalent to the reported phosphorylated Ser168 14-3-3-binding site.</p> <p><b>References to 14-3-3 binding to Yorkie</b><br/>Badouel C, Gardano L, Amin N, Garg A, Rosenfeld R, Le Bihan T, McNeill H. The FERM-domain protein Expanded regulates Hippo pathway activity via direct interactions with the transcriptional activator Yorkie. <i>Dev Cell</i>. 2009 Mar;16(3):411-20.<br/>Ren F, Zhang L, Jiang J. Hippo signaling regulates Yorkie nuclear localization and activity through 14-3-3 dependent and independent mechanisms. <i>Dev Biol</i>. 2009 Nov 6. [Epub ahead of print]</p>                                                                                                                                                                                                                                                                                                                                                                                                                                                                                                                                                                                                                                                                                                               |  |
| <p><b>Xenopus casp2</b> Caspase-2 from <i>Xenopus laevis</i> (Swissprot = Q9IB67)<br/> 1 MLGGMQQHHR KALQRLRVSL ASEMIEEELL DHLVSSEILT NNMHSNIMAY RSDYAQNVAL<br/> 61 LNLLEPKRGR AFSAFCNALH STNQEHLAQQ VEKEALLQEE FITSKVHHGS FPLPVQESTL<br/> 121 SRPGRQICRE YREEIDDDGD GPVTVQLCSV NFYITHCQQA YKMHSCPRGR ALLISNVKFE<br/> 181 TPDLDYRCGG EVDLASLEKL FSSLGQYQDV RCNLNAQSMQ SGLGAFSALP VHSALDSCVV<br/> 241 AILSHGLDGA VYGTGKLVQ LQEVFTALDN AHCPQLQNKP KMFFIQACRG EETDRGVDQR<br/> 301 DGREQSGSPG CEQSDAGRED IKVRLPTQSD MICAYACLKG TVSLRNTRKR SWFVQDLVSV<br/> 361 FSQHSKTDHV ADMLVKVNAL IKEREGHAPG TEFHRCKEMS EYCSTLCRDL YLFPGPSNSG<br/> 421 LPK</p> <p>&gt;gi 82221953 sp Q9IB67 Q9IB67_XENLA Caspase-2 (XCaspase-2 protein)<br/> MLGGMQQHHRKALQRLRVSLASEMIEEELLDHLVSSEILTNNMHSNIMAYRSDYAQNVALNLLPKRGR<br/> AFSAFCNALHSTNQEHLAQQVEKEALLQEEFITSKVHHGSFPLPVQESTLSRQGRQICREYREESIDDDGD<br/> GPVTVQLCSVNFYITHCQQAQYKMHSCPRGRALLISNVKFEPTDLDYRCGGEVDLASLEKLFSSLGQYQDV<br/> RCNLNAQSMMSQLGAFSALPVHSALDSCVVAIILSHGLDGA VYGTGKLVQLQEVFTALDNAHCPQLQNKP<br/> KMFFIQACRGEETDRGVDQRDGREQSGSPGCEQSDAGREDIKVRLPTQSDMICAYACLKGTVSLRNTRKR<br/> SWFVQDLVSVFSQHSKTDHVADMLVKVNALIKEREGHAPGTEFHRCKEMSEYCSTLCRDL YLFPGPSNSG<br/> LPK</p> <p><b>Notes</b><br/>Ser135 to Ala mutation prevented 14-3-3 binding</p> <p><b>References to 14-3-3 binding to Xenopus Caspase-2</b><br/>Nutt LK, Buchakjian MR, Gan E, Darbandi R, Yoon SY, Wu JQ, Miyamoto YJ, Gibbon JA, Andersen JL, Freel CD, Tang W, He C, Kurokawa M, Wang Y, Margolis SS, Fissore RA, Kornbluth S. Metabolic control of oocyte apoptosis by 14-3-3zeta-regulated dephosphorylation of caspase-2. <i>Dev Cell</i>. 2009 Jun;16(6):856-66.</p>                                                                                                                                                                                                                                                                                                                                                                                                                                                                               |  |
| <p><b>Xenopus wee1</b> Xenopus Wee1 (Swissprot = P47817 for Xenopus laevis Wee1)<br/> 1 MRTAMSCGGG LVQRDFSS DEEDGLSNGI NEGPKQKSPV SSWRTNNCPF PITPQRNERE<br/> 61 LSPTQELSPS SDYSPDPSVG AECPGTPLHY STWKKLKLCD TPYTPKSLLY KTLPSPGSRV<br/> 121 HCRGQRLRF VAGTGAELDD PSLVNINPFT PESYRQTHFQ PNGKRKERPE DDCRTDRQMK<br/> 181 YAEKEHPAVF QSKRFVLRTE NMGSRYKTEF LEIEKIGAGE FGSVFKCVKR LDGCFYAIKR<br/> 241 SKKPLAGSTD EQLALREVYA HAVLGHHPHV VRYSSAWAED DHMIIQNEYC NGGSLQDLIV<br/> 301 DNNKEGQFVL EQELKEILLQ VSMGLKYIHG SGLVHMDIKP SNIFICRKQT ELGQEEESDGE<br/> 361 DDLSSGSVLY KIGDLGHVTS ILNPQVEEGD SRFLANEILQ EDYSQLPKAD IFALGLTIAL<br/> 421 AAGAAPLPCN EDSWHHIRK NLPHPVQLLT PVFLALLKLL VHPDPVMRPP AASLAKNSVL<br/> 481 RRCVGAQAQL QKQLNVEKFK TAMPLERELKA AKLAQTSKGD ECSDLPPMSG FSCRGRKRLV<br/> 541 GAKNTRSLF TCGGY</p> <p>&gt;gi 1351421 sp P47817.1 WEE1A_XENLA RecName: Full=Wee1-like protein kinase<br/> MRTAMSCGGGLVQRDFSSDEEDGLSNGINEGPKQKSPVSSWRTNNCPFITPQRNERELSPTELSPLS<br/> SDYSPDPSVGAECPGTPLHYSTWKKLKLCDTPYTPKSLLYKTLPSPGSRVHCRGQRLRFVAGTGAELDD<br/> PSLVNINPFTPESYRQTHFQPNGKRKERPEDDCRTDRQMKYAEKEHPAVFQSKRFVLRTE NMGSRYKTEF<br/> LEIEKIGAGEFGSVFKCVKRLDGC FYAIKRSKKPLAGSTDEQLALREVYAHAVLGHHPHVRYSSAWAED<br/> DHMIIQNEYCNGGSLQDLIVDNNKEGQFVLEQELKEILLQVSMGLKYIHGSGLVHMDIKPSNIFICRKQT<br/> ELGQEEESDGEDDLSSGSVLYKIGDLGHVTSILNPQVEEGDSRFLANEILQEDYSQLPKADIFALGLTIAL<br/> AAGAAPLPCNEDSWHHIRKNLPHVQLLT PVFLALLKLLVHPDPVMRPPAASLAKNSVLRRCVGAQAQL<br/> QKQLNVEKFKTAMPLERELKAQAQTSKGD ECDLPPMSGFSCRGRKRLV GAKNTRSLSFTCGGY</p> <p><b>Notes</b><br/>Binding of 14-3-3 to Xwee1 occurs during interphase, but not M-phase, and requires phosphorylation of Xwee1 on Ser-549. A mutant of Xwee1 (S549A) that cannot bind 14-3-3 is substantially less active than wild-type Xwee1 in its ability to phosphorylate Cdc2. Two primers (S549A-T, 5'-CACTCGATCGCTAGCCTTAC; and S549A-B, 5'-GCAGGTGAAGGCTAGCATCG) were used for mutagenesis of serine-549 to alanine.</p> <p><b>References to 14-3-3 binding to Xenopus wee1</b><br/>Lee J, Kumagai A, Dunphy WG. Positive regulation of Wee1 by Chk1 and 14-3-3 proteins. <i>Mol Biol Cell</i>. 2001 Mar;12(3):551-63.</p> |  |
| <p><b>Fungal proteins reported to interact directly with 14-3-3</b><br/> <b>Saccharomyces cerevisiae Acm1</b> (APC/C-CDH1 modulator 1) (yeast) Anaphase-promoting complex (APC) inhibitor (YPL267W)</p>                                                                                                                                                                                                                                                                                                                                                                                                                                                                                                                                                                                                                                                                                                                                                                                                                                                                                                                                                                                                                                                                                                                                                                                                                                                                                                                                                                                                                                                                                                                                                                                                                                                                                                                                                                                                                                                                                                                                                       |  |

|                                                                                                                                                                                                                                                                                                                                                                                                                                                                                                                                                                                                                                                                                                                                                                                                                                                                                                                                                                                                                                                                                                                                                                                                                                                                                                                                                                                                                                                                                                                                                                                                                                                                                                                                                                                                                                                                                                                                                                                                                                                                                                                                                                                                                                                                                                                                                                                                                                                                                                                                                                                                                                                                             |                       |
|-----------------------------------------------------------------------------------------------------------------------------------------------------------------------------------------------------------------------------------------------------------------------------------------------------------------------------------------------------------------------------------------------------------------------------------------------------------------------------------------------------------------------------------------------------------------------------------------------------------------------------------------------------------------------------------------------------------------------------------------------------------------------------------------------------------------------------------------------------------------------------------------------------------------------------------------------------------------------------------------------------------------------------------------------------------------------------------------------------------------------------------------------------------------------------------------------------------------------------------------------------------------------------------------------------------------------------------------------------------------------------------------------------------------------------------------------------------------------------------------------------------------------------------------------------------------------------------------------------------------------------------------------------------------------------------------------------------------------------------------------------------------------------------------------------------------------------------------------------------------------------------------------------------------------------------------------------------------------------------------------------------------------------------------------------------------------------------------------------------------------------------------------------------------------------------------------------------------------------------------------------------------------------------------------------------------------------------------------------------------------------------------------------------------------------------------------------------------------------------------------------------------------------------------------------------------------------------------------------------------------------------------------------------------------------|-----------------------|
| <pre> 1 MISPSKRTI LSSKNINQKP RAVVKGNELR SPSKRRSQID TDYALRRSPI KTIQISKAAQ 61 FMLYEETAE RNIHAVHRNE IYNNNSVSN ENNPSQVKEN LSPAKICPYE RAFLREGGRI 121 ALKDLSVDF KGYIQDPLTD ETIPLTLPLG DKKISLPSFI PPRNSKISI FFTSKHQGQN 181 PETKISRSTD DVSEKKVVRK LSFHVVYEDE </pre> <p><b>Notes</b><br/>T161A (DKKISLPSFI(PPRNSKISIF) mutation abolished 14-3-3 binding. However, 5 additional phospho sites were identified (Ser37, Ser48, Ser102, Ser126, Ser155, Ser166, Ser202) and Acml showed reduced BMH1/2 binding when all sites except T161 were mutated suggesting T161 is the major site but that another site is required for optimal binding. Relevant kinase = Cdc28 in the CMGC subfamily of protein kinases. (The sequence surrounding Thr-161 (FIP(PPP) is both highly conserved in ACM1 orthologs and resembles the mode II 14-3-3 consensus binding sequence (RX(Y/F)XpSXP)).</p> <p><b>References to 14-3-3 binding to yeast Acml</b><br/>Hall MC, Jeong DE, Henderson JT, Choi E, Bremmer SC, Iliuk AB, Charbonneau H. Cdc28 and Cdc14 control stability of the anaphase-promoting complex inhibitor Acml. J Biol Chem. 2008 Apr 18;283(16):10396-407.<br/>Dial JM, Petrotchenko EV, Borchers CH. Inhibition of APCCdh1 activity by Cdh1/Acml/Bmh1 ternary complex formation. J Biol Chem. 2007 Feb 23;282(8):5237-48.<br/>Martinez JS, Jeong DE, Choi E, Billings BM, Hall MC. Acml is a negative regulator of the CDH1-dependent anaphase-promoting complex/cyclosome in budding yeast. Mol Cell Biol. 2006 Dec;26(24):9162-76</p>                                                                                                                                                                                                                                                                                                                                                                                                                                                                                                                                                                                                                                                                                                                                                                                                                                                                                                                                                                                                                                                                                                                                          |                       |
| <p><b>Saccharomyces cerevisiae Fin1</b> Filament protein FIN1 (Filaments in between nuclei protein 1) (Swissprot = Q03898)</p> <pre> 1 MSNKSNNRSL RDIGNTIGRN NIPSDKDNV VRLSMSPLRT TSQKEFLKPP MRISPNTDGD 61 MKHSIQVTPR RIMSPECLKG YVSKETQSLD RPQFKNSNKN VKIQNSDHIT NIIFFPTSPTK 121 LTFNSENKIG GDGSLTRIRA RFKNGLMSPE RIQQQQQHI LPSDAKSNTD LCSNTEPKDA 181 PFENDLPRAK LKGNLLVEL KKEEEDVGN IESLTKSNTK LNSMLANEGK IHKASFQKSV 241 KFKLPDNIVT EETVELKEIK DLLLQMLRRQ REIESRLSNI ELQLTEIPKH K </pre> <p>&gt;gi 41017084 sp Q03898.1 FIN1_YEAST RecName: Full=Filament protein FIN1;<br/>AltName: Full=Filaments in between nuclei protein 1<br/>MSNKSNNRSLRDIGNTIGRNIPSDKDNVRLSMSPLRTTSQKEFLKPPMRISPNTDGMKHSIQVTPR<br/>RIMSPECLKGYVSKETQSLDRPQFKNSNKNVKIQNSDHITNIIFFPTSPTKLTFSNENKIGDGLTRIRA<br/>RFKNGLMSPERIQQQQQHILPSDAKSNTDLCNTEPKDAFENDLPRAKLGKGNLLVELKKEEEDVGN<br/>IESLTKSNTKLNMLANEGKIHKASFQKSVKFKLPDNIVTEETVELKEIKDLLLQMLRRQREIESRLSNI<br/>ELQLTEIPKHK</p> <p><b>Notes</b><br/>"Our results suggest that both sequences around residue 58 and the C-terminal part of Fin1p are required for association with Bmh2p (van Hemert et al 2003)." 14-3-3-binding site(s) not defined precisely</p> <p><b>References to 14-3-3 binding to Saccharomyces cerevisiae Fin1</b><br/>van Hemert MJ, Deelder AM, Molenaar C, Steensma HY, van Heusden GP. Self-association of the spindle pole body-related intermediate filament protein Fin1p and its phosphorylation-dependent interaction with 14-3-3 proteins in yeast. J Biol Chem. 2003 Apr 25;278(17):15049-55.<br/>Mayordomo I, Sanz P. The Saccharomyces cerevisiae 14-3-3 protein Bmh2 is required for regulation of the phosphorylation status of Fin1, a novel intermediate filament protein. Biochem J. 2002 Jul 1;365(Pt 1):51-6.</p>                                                                                                                                                                                                                                                                                                                                                                                                                                                                                                                                                                                                                                                                                                                                                                                                                                                                                       | NO SITES FOR WEBLOGO. |
| <p><b>Saccharomyces cerevisiae Msn2</b> Zinc finger protein MSN2 (Multicopy suppressor of SNF1 protein 2) (Swissprot = P33748)</p> <pre> 1 MTDVDFNFSE DILFPIESMS SIQYVENNNP NNINNDVIPY SLDIKNTVLD SADLNDIQNQ 61 ETSNLGLLPP LSFDSPLPVT ETIPSTTNS LHLKADSNKN RDARTIENDS EIKSTNNASG 121 SGANQYTTLT SPYPMNDILY NMNNPLQSPS PSSVPQNPTI NPPINTASNE TNLSPQTSNG 181 NETLISPRAQ QHTSIKDNRL SLPNGANSNL FIDTNPNNLN EKLRLNQLNSD TNSYSNSISN 241 SNSNSTGNLM SSYFNSLNID SMLDDYVSSD LLLNDDDDDT NLSRRRFSV ITNQFPMTN 301 SRNSISHSLD LWNHPKINP NRNTNLNITT NSTSSSNASP NTTTMNANAD SNIAGNPKNN 361 DATIDNELTQ ILNEYNMNFN DNLGTSTSGK NKSACPSSFD ANAMTKINPS QQLQQQLNRV 421 QHKQLTSSHN NSSTNMKSFN SDLYSRRQRA SLPIIDDSLS YDLVKNQDED PKNDMLPNSN 481 LSSSQQFIKP SMILSDNASV IAKVATTGLS NDMPFLTEEG EQANSTPNF DLSITQMNMA 541 PLSPASSSST SLATNHFYHH FPQQGHHTMN SKIGSSLRRR KSAVPLMGTV PLTNQQNNIS 601 SSSVNSTGNG AGVTKERRPS YRRKSMTPSR RSSVVIESTK ELEEKPFHCH ICPKSFKRSE 661 HLKRHVRSVH SNERPFACHI CDKFSRSDN LSQHIKTHKK HGDI </pre> <p>&gt;gi 462625 sp P33748.1 MSN2_YEAST RecName: Full=Zinc finger protein MSN2;<br/>AltName: Full=Multicopy suppressor of SNF1 protein 2<br/>MTDVDFNFSE DILFPIESMS SIQYVENNNP NNINNDVIPY SLDIKNTVLD SADLNDIQNQ ETSNLGLLPP<br/>LSFDSPLPVT ETIPSTTNS LHLKADSNKN RDARTIENDS EIKSTNNASG SGANQYTTLT SPYPMNDILY<br/>NMNNPLQSPS PSSVPQNPTI NPPINTASNE TNLSPQTSNG NETLISPRAQ QHTSIKDNRL SLPNGANSNL<br/>FIDTNPNNLN EKLRLNQLNSD TNSYSNSISN SNSNSTGNLM SSYFNSLNID SMLDDYVSSD LLLNDDDDDT<br/>NLSRRRFSV ITNQFPMTN SRNSISHSLD LWNHPKINP NRNTNLNITT NSTSSSNASP NTTTMNANAD<br/>SNIAGNPKNN DATIDNELTQ ILNEYNMNFN DNLGTSTSGK NKSACPSSFD ANAMTKINPS QQLQQQLNRV<br/>QHKQLTSSHN NSSTNMKSFN SDLYSRRQRA SLPIIDDSLS YDLVKNQDED PKNDMLPNSN LSSSQQFIKP<br/>SMILSDNASV IAKVATTGLS NDMPFLTEEG EQANSTPNF DLSITQMNMA PLSPASSSST SLATNHFYHH<br/>FPQQGHHTMNSKIGSSLRRR KSAVPLMGTV PLTNQQNNIS SSSVNSTGNG AGVTKERRPS YRRKSMTPSR<br/>RSSVVIESTK ELEEKPFHCH ICPKSFKRSE HLKRHVRSVH SNERPFACHI CDKFSRSDNLSQHIKTHKK<br/>HGDI</p> <p><b>Notes</b><br/>TOR inhibits expression of carbon-source-regulated genes by stimulating the binding of the transcriptional activators MSN2 and MSN4 to the cytoplasmic 14-3-3 protein BMH2. 14-3-3-binding site(s) not defined.</p> <p><b>References to 14-3-3 binding to Saccharomyces cerevisiae Msn2 and Msn4</b><br/>Beck T, Hall MN. The TOR signalling pathway controls nuclear localization of nutrient-regulated transcription factors. Nature. 1999 Dec 9;402(6762):689-92.<br/>Bruckmann A, Steensma HY, Teixeira De Mattos MJ, Van Heusden GP. Regulation of transcription by Saccharomyces cerevisiae 14-3-3 proteins. Biochem J. 2004 Sep 15;382(Pt 3):867-75.</p> | NO SITES FOR WEBLOGO. |

|                                                                                                                                                                                                                                                                                                                                                                                                                                                                                                                                                                                                                                                                                                                                                                                                                                                                                                                                                                                                                                                                                                                                                                                                                                                                                                                                                                                                                                                                                                                                                                                                                                                                                                                                                                                                                                                                                                                                                                                                                                                                                                                                                                                                                                               |                                                         |
|-----------------------------------------------------------------------------------------------------------------------------------------------------------------------------------------------------------------------------------------------------------------------------------------------------------------------------------------------------------------------------------------------------------------------------------------------------------------------------------------------------------------------------------------------------------------------------------------------------------------------------------------------------------------------------------------------------------------------------------------------------------------------------------------------------------------------------------------------------------------------------------------------------------------------------------------------------------------------------------------------------------------------------------------------------------------------------------------------------------------------------------------------------------------------------------------------------------------------------------------------------------------------------------------------------------------------------------------------------------------------------------------------------------------------------------------------------------------------------------------------------------------------------------------------------------------------------------------------------------------------------------------------------------------------------------------------------------------------------------------------------------------------------------------------------------------------------------------------------------------------------------------------------------------------------------------------------------------------------------------------------------------------------------------------------------------------------------------------------------------------------------------------------------------------------------------------------------------------------------------------|---------------------------------------------------------|
| <p>Santhanam A, Hartley A, Düvel K, Broach JR, Garrett S. PP2A phosphatase activity is required for stress and Tor kinase regulation of yeast stress response factor Msn2p. <i>Eukaryot Cell</i>. 2004 Oct;3(5):1261-71.</p>                                                                                                                                                                                                                                                                                                                                                                                                                                                                                                                                                                                                                                                                                                                                                                                                                                                                                                                                                                                                                                                                                                                                                                                                                                                                                                                                                                                                                                                                                                                                                                                                                                                                                                                                                                                                                                                                                                                                                                                                                  |                                                         |
| <p><b>Saccharomyces cerevisiae Pik1</b> Yeast phosphatidylinositol 4-kinase</p> <p>1 MHKASSSKKS FDDTIELKKN EQLLKLINS EFTLHNCVEL LCKHSENIGI HYYLCQKLAT<br/> 61 FPHSELQFYI PQLVQVLVTM ETESMALEDL LLRLRAENPH FALLTFWQLQ ALLTDLSTDP<br/> 121 ASYGFQVARR VLNNLQTNLF NTSSGSDKNV KIHENVAPAL VLSSMIMSAI AFPQLSEVTK<br/> 181 PLVESQGRRO KAFVFKLARS AMKDFTKNMT LKNTLLNKKT SRSKRVSSNR SSTPTSPIDL<br/> 241 IDPIKTKEDA SFRKSRHSEV KLDFDIVDDI GNQVFEERIS SSIKLPKRPK KYLDNSYVHR<br/> 301 TYDGKNINRD GSIANTAKAL DGNKGDYISP KGRNDENNEI GNNEDETGGE TEEDADALNS<br/> 361 DHFTSSMPDL HNIQPTSSA SSASLEGTPK LNRTN<sup>Q</sup>PLS RQAFKNSKKA NSSLSQEIDL<br/> 421 SQLSTTSKIK MLKANYFRCE TQFAIALETI SQRLARVPE ARLSALRAEL FLLNRDLPAE<br/> 481 YDIPTLLPPN KKGKHLKLVIT ITANEAQVLN SAEKVPYLLL IEYLRFDEFDF DPTSETNERL<br/> 541 LKKISGNQGG LIFDLNVMNR KENNENRNES TLTNNTRSS VYDSNSFNNG ASRNEGLSST<br/> 601 SRSDSASTAH VRTEVNKEED LGDMSVMKVR NRTDDEAYRN ALVIQSAANV PILPDDSQDR<br/> 661 SPELNFGSNL DEVLIEGIN SKNIHSQTD LADQMRVSAV MLAQLDKSPQ QLSESTKQIR<br/> 721 AQIISMKKEV QDKFGYHLE ALHGMAGERK LENDLMTGGI DTSYLGEDWA TKKERIRKTS<br/> 781 EYGHFENWDL CSVIAKTGDD LRQEAFAQYM IQAMANIWVK EKVDVWVKRM KILITSANTG<br/> 841 LVETITNAMS VHSIKKALTK KMIEDAELDD KGGIASLNDH FLRAFNGPNG FKYRRAQDNF<br/> 901 ASSLAAYSVI CYLLQVKDRH NGNIMIDNEG HVSHIDFGFM LSNSPGSGVF EAAPFKLTYE<br/> 961 YIELLGGVE EAFKLFVELT KSSFALRKY ADQIVSMCEI MQKDNMQPCF DAGEQTSVQL<br/> 1021 RQRQQLDLE KEVDDFVENF LIGKSLGSIY TRIYDQFQLI TQGIYS</p> <p><b>Notes</b><br/> 390-LNRTN(pS)QP-399</p> <p><b>References to 14-3-3 binding to Pik1</b><br/> Demmel L, Beck M, Klose C, Schlaitz AL, Gloor Y, Hsu PP, Havlis J, Shevchenko A, Krause E, Kalaidzidis Y, Walch-Solimena C. Nucleocytoplasmic shuttling of the Golgi phosphatidylinositol 4-kinase Pik1 is regulated by 14-3-3 proteins and coordinates Golgi function with cell growth. <i>Mol Biol Cell</i>. 2008 Mar;19(3):1046-61.</p>                                                                                                                                                                                                                                                                                                                          | <p>NO SWISS PROT</p>                                    |
| <p><b>Saccharomyces cerevisiae Rtg3</b> Retrograde regulation protein 3 (Swissprot = P38165)</p> <p>1 MMNNESEAE NQRLLDELMN QTKVLQETLD FSLVTPPHH NDDYKIHGSA YPGGETPAQQ<br/> 61 HEKLSYINTH NSNDNNLMG SQARSNSQTP TASTIYEEAE SQSSYLDDMF RTSQGGRPVT<br/> 121 QNSISSIGQG PLRSSYSMAY DSPVDRAMNT PLQQQEGKLA ELPHDFLFQH GTDDTMYNLT<br/> 181 DDLSSLSLSS INSDMMTPNT YSSSFSYNPQ SLGPASVST YSPKVRSPSS SFRAGSFLSS<br/> 241 SFRHGSINTP RTRHTSISSN MTENIGPGSV PKILGGLTSD EKLRRKREFH NAVERRRREL<br/> 301 IKQKIKELGQ LVPPSLLNYD DLGKQIKPNK GIILDRTVEY LOYLAEILEI QARKKKALLA<br/> 361 KIKELKEEKS SVAALSPFTN NHHASSGQNN SENSEERIID IRVSPNALMN EQNSKAELHN<br/> 421 WEPPLYDSVG NHHAGTMES HPHTNIHEEL KEFLSGDLIE AEDNAKLMFG DDNSNPADYL<br/> 481 LEFGSG</p> <p>&gt;gi 1710804 sp P38165.2 RTG3_YEAST RecName: Full=Retrograde regulation protein 3</p> <p>MMNNESEAEANQRLLDELMNQTKVLQETLDFSLVTPPHHNDYKIHGSAYPGGETPAQQHEKLSYINTH<br/> NSNDNNLMG SQARSNSQTP TASTIYEEAE SQSSYLDDMF RTSQGGRPVT QNSISSIGQG PLRSSYSMAY<br/> DSPVDRAMNT PLQQQEGKLA ELPHDFLFQH GTDDTMYNLT DDLSSLSLSS INSDMMTPNT YSSSFSYNPQ<br/> SLGPASVST YSPKVRSPSS SFRAGSFLSS SFRHGSINTP RTRHTSISSN MTENIGPGSV PKILGGLTSD<br/> EKLRRKREFH NAVERRRREL IKQKIKELGQ LVPPSLLNYD DLGKQIKPNK GIILDRTVEY LOYLAEILEI<br/> QARKKKALLA KIKELKEEKS SVAALSPFTN NHHASSGQNN SENSEERIID IRVSPNALMN EQNSKAELHN<br/> WEPPLYDSVGNHHAGTMESH PHTNIHEEL KEFLSGDLIE AEDNAKLMFG DDNSNPADYL LEFGSG</p> <p><b>Notes</b><br/> bZip/HLH transcription factor. 14-3-3-binding site(s) not defined.</p> <p><b>References to 14-3-3 binding to Saccharomyces cerevisiae Rtg3</b><br/> van Heusden GP, Steensma HY. 14-3-3 Proteins are essential for regulation of RTG3-dependent transcription in <i>Saccharomyces cerevisiae</i>. <i>Yeast</i>. 2001 Dec;18(16):1479-91.<br/> Ichimura T, Kubota H, Goma T, Mizushima N, Ohsumi Y, Iwago M, Kakiuchi K, Shekhar HU, Shinkawa T, Taoka M, Ito T, Isoe T. Transcriptomic and proteomic analysis of a 14-3-3 gene-deficient yeast. <i>Biochemistry</i>. 2004 May 25;43(20):6149-58.<br/> Bruckmann A, Steensma HY, Teixeira De Mattos MJ, Van Heusden GP. Regulation of transcription by <i>Saccharomyces cerevisiae</i> 14-3-3 proteins. <i>Biochem J</i>. 2004 Sep 15;382(Pt 3):867-75.</p> | <p>NO SITES FOR WEBLOGO.</p>                            |
| <p><b>Schizosaccharomyces pombe Cdc25</b> (uniprot P06652) (GenBank: CAA90849.1)</p> <p>1 MDSPLSSLSF TNLGSKRNV LRPAARELKL MSDRANQEL DFFFPKSKHI ASTLVDPFGK<br/> 61 TCSTASPASS LAADSMNMH IDESPALPTP RRTLFRSLSC TVETPLANKT IVSPLPESPS<br/> 121 NDALTESYFF RQPASKYSIT QDSPRVSTI AYSFKPKASI ALNNTKSEAT RSSLSSSSFD<br/> 181 SYLRPNVSRSS RSGNAPPFL RSRSSSSYSI NKKKGTSGGQ ATRHLTYALS RTCSQSSNTT<br/> 241 SLESCLTDD TDDFELMSDH EDTFTMGKVA DLPESSVELV EDAASIQRPN SDFGACNDNS<br/> 301 LDDLQFQASPI KPIDMLPKIN KDIAFPPLKV RSPSPMAFAM QEDAAYDEQD TPVLRRTQSM<br/> 361 FLNSTRGLGF KSQDLVCVTP KQSTKESERF ISSHVEDLSL PCFAVKEDSL KRITQETLLG<br/> 421 LLDGKFKDIF DCIIIDCRF EYEYLGGHIS TAVNLNTKQA IVDAFLSKPL THRVALVFHC<br/> 481 EHSAHRAPHL ALHFRNTDRR MNSHRYPPFL YPEVYILHGG YKSFYENHNK RCDPINYVPM<br/> 541 NDASHVMTCT KAMNNFKRNA TFMRTKSYTF GQSVLASPDV NDSPTAMHSL STLRRF</p> <p>&gt;sp P06652 MPIP_SCHPO M-phase inducer phosphatase OS=Schizosaccharomyces pombe<br/> GN=cdc25 PE=1 SV=2</p> <p>MDSPLSSLSFTNLGSKRNVLRPAARELKLMSDRANQELDFFFPKSKHIASTLVDPFGK<br/> TCSTASPASSLAADSMNMHIDESPALPTPRRTLFRSLSC TVETPLANKTIVSPLPESPS<br/> NDALTESYFFRQPASKYSITQDSPRVSTIAYSFKPKASIALNNTKSEATRSSLSSSSFD<br/> SYLRPNVSRSSRSGNAPPFLRSRSSSSYSINKKGTSGGQATRHLTYALSRTCSQSSNTT<br/> SLESCLTDDTDDFELMSDHEDTFTMGKVA DLPESSVELVEDAAS IQRPNDFGACNDNS<br/> LDDLQFQASPIKPIDMLPKINKDIAFPPLKVRSPSPMAFAMQEDAAYDEQDTPVLRRTQSM<br/> FLNSTRGLGFKSQDLVCVTPKQSTKESERF ISSHVEDLSLPCFAVKEDSLKRITQETLLG</p>                                                                                                                                                                                                                                                                                                                                                                                                                                                                                                                                                                                                                                                                                                                                                                                       | <p>Sites of 14-3-3 binding not defined. NO WEBLOGO.</p> |

|                                                                                                                                                                                                                                                                                                                                                                                                                                                                                                                                                                                                                                                                                                                                                                                                                                                                                                                                                                                                                                                                                                                                                                                                                                                                                                                                                                                                                                                                                                                                                                                                                                                                                                                                                                                                                                                                                                                                                                                                                                                                                                                                                                                                                                                                                                                                                                                                                                                        |                                                         |
|--------------------------------------------------------------------------------------------------------------------------------------------------------------------------------------------------------------------------------------------------------------------------------------------------------------------------------------------------------------------------------------------------------------------------------------------------------------------------------------------------------------------------------------------------------------------------------------------------------------------------------------------------------------------------------------------------------------------------------------------------------------------------------------------------------------------------------------------------------------------------------------------------------------------------------------------------------------------------------------------------------------------------------------------------------------------------------------------------------------------------------------------------------------------------------------------------------------------------------------------------------------------------------------------------------------------------------------------------------------------------------------------------------------------------------------------------------------------------------------------------------------------------------------------------------------------------------------------------------------------------------------------------------------------------------------------------------------------------------------------------------------------------------------------------------------------------------------------------------------------------------------------------------------------------------------------------------------------------------------------------------------------------------------------------------------------------------------------------------------------------------------------------------------------------------------------------------------------------------------------------------------------------------------------------------------------------------------------------------------------------------------------------------------------------------------------------------|---------------------------------------------------------|
| <p>LLDGKFKDIFDKCIIIDCRFEYEYLGHHISTAVNLNTKQAIVDAFLSKPLTHRVALVFHC<br/>EHSARHAPHLALHFRTDRMRNSHRYFFLYPEVYILHGGYKSFYENHKNRCDPINYVPM<br/>NDASHVMTCTKAMNNFKRNATFMRTKSYTFGQSVLASPDVNSPTAMHSLSTLRRF</p> <p><b>References to 14-3-3 binding to Cdc25</b><br/>Sorrell DA, Marchbank AM, Chrimes DA, Dickinson JR, Rogers HJ, Francis D, Grierson CS, Halford NG. The Arabidopsis 14-3-3 protein, GF14omega, binds to the Schizosaccharomyces pombe Cdc25 phosphatase and rescues checkpoint defects in the rad24- mutant. <i>Planta</i>. 2003 Nov;218(1):50-7.</p>                                                                                                                                                                                                                                                                                                                                                                                                                                                                                                                                                                                                                                                                                                                                                                                                                                                                                                                                                                                                                                                                                                                                                                                                                                                                                                                                                                                                                                                                                                                                                                                                                                                                                                                                                                                                                                                                                                |                                                         |
| <p><b>Schizosaccharomyces pombe Mei2P</b> (Meiosis protein 2) P08965</p> <p>1 MIMETESPLS ITSPSPSDST FQVDMKTMH ALPSSLLDSP LLSTNEHYPP KSTLLLSGSPS<br/>61 PIRNIQLSAT KSSESNSIDY LTDTQNIFFN FVNNENNYQF STAPLNPIDA CRVGERKVFT<br/>121 TGNVLLSADR QPLSTWQQNI SVLSESPQNGI QSIYSSSE QAAQALTRKP SVTGRFSSSL<br/>181 NSNSDDIDIF SHASRYLFVT NLPRIVPYAT LLELFSKLGVD VKGIDTSSLS TDGICIVAFF<br/>241 DIRQAIQAAK SLRSQRFFND RLLYFQFCQR SSIQKMINQG ATIQFLDDNE QQLLLNMQGG<br/>301 SVLSILQLQS ILQTFGPLLI MKPLRSQNVS QIICEFYDTR DASFALDELD GRIIHNCCLO<br/>361 VAYYDAMADS VSTSSASSLS VPRGFSGMLN NNSEWNNSMT MASNQETPTA ASCAVSRIGS<br/>421 SYGMSNNFGS VPLGRTESSP AWGTSGYYDV SSTSPVAPSD RNPSRQYNSI RYGLDVNPIA<br/>481 PPNSRLKQR NSDLLNGINP QWSPFSSNTG KVFDSPTGSL GMRRLVGA NASCSNPTNL<br/>541 SFASLTLLHDS KADSTLSASS LNPDLNLQRY TPTVEKHASD RNSVDYQIA SGIDTRTVM<br/>601 IKNI PNKFTQ QMLRDYIDVT NKGTYDFLYL RIDFVNKCNV GYAFINFI EP QSIITFGKAR<br/>661 VGTQWNV FHS EKICDISYAN IQGKDRLEIK FRNSCVMDEN PAYRPKIFVS HGPNRGMEEP<br/>721 FPAPNNARRK LRSIASAQOI GLFPPTASKC</p> <p>&gt;gi 126947 sp P08965.1 MEI2_SCHPO RecName: Full=Meiosis protein mei2<br/>MIMETESPLSITSPSPSDSTFQVDMKTMHALPSSLLDSPLLSTNEHYPPKSTLLLSGSPSPIRNIQLSAT<br/>KSSESNSIDYLTDTQNIFFNFVNNENNYQFSTAPLNPIDACRVGERKVFTTGNVLLSADRQPLSTWQQNI<br/>SVLSESPQNGI QSIYSSSE QAAQALTRKPSVTGRFSSSLNSNSDDIDIFSHASRYLFVTNLPRIVPYAT<br/>LLELFSKLGVDVKGIDTSSSLSTDGICIVAFFDIRQAIQAAKSLRSQRFFNDRLLYFQFCQRSSIQKMINQG<br/>ATIQFLDDNEQQLLLNMQGGSVLSILQLQSILQTFGPLIMKPLRSQNVSQIICEFYDTRDASFALDELD<br/>GRIIHNCCLOVAYYDAMADSVSTSSASSLSVPRGFSGMLNNSSEWNNSMTMSNQETPTAASCASVSRIGS<br/>SYGMSNNFGSVPLGRTESSPAWGTSGYYDVSTSPVAPSDRNPSRQYNSIRYGLDVNPIAPPNSRLKQR<br/>NSDLLNGINPQWSPFSSNTGKVFDSPTGSLGMRRLTVGANASCSNPTNLSFASLTLLHDSKADSTLSASS<br/>LNPDLNLQRYTPTVEKHASDRNSVDYQIASGIDTRTVMIKNI PNKFTQ QMLRDYIDVTNKGTYDFLYL<br/>RIDFVNKCNVGYAFINFI EPQSIITFGKARVGTQWNV FHS EKICDISYANI QGKDRLEIKFRNSCVMDEN<br/>PAYRPKIFVSHGPNRGMEEPPAPNNARRK LRSIASAQOIGLFPPTASKC</p> <p><b>Notes</b><br/>Mei2p Phosphorylated by Pat1 Kinase Has a Higher Affinity for Rad24p (S. pombe 14-3-3), and the two sites implicated by mutagenesis are RTEpS<sup>438</sup>SP and RSLpT<sup>527</sup>VG</p> <p><b>References to 14-3-3 binding to Mei2P</b><br/>Sato M, Watanabe Y, Akiyoshi Y, Yamamoto M. 14-3-3 protein interferes with the binding of RNA to the phosphorylated form of fission yeast meiotic regulator Mei2p. <i>Curr Biol</i>. 2002 Jan 22;12(2):141-5.</p> |                                                         |
| <p><b>Ustilago maydis cdc25s</b><br/><b>Fungal cdc25s</b><br/>Mielnichuk N, Pérez-Martín J. 14-3-3 regulates the G2/M transition in the basidiomycete Ustilago maydis. <i>Fungal Genet Biol</i>. 2008 Aug;45(8):1206-15.<br/>Pan S, Sehne PC, Ferl RJ, Gurley WB. Specific interactions with TBP and TFIIB in vitro suggest that 14-3-3 proteins may participate in the regulation of transcription when part of a DNA binding complex. <i>Plant Cell</i>. 1999 Aug;11(8):1591-602.</p>                                                                                                                                                                                                                                                                                                                                                                                                                                                                                                                                                                                                                                                                                                                                                                                                                                                                                                                                                                                                                                                                                                                                                                                                                                                                                                                                                                                                                                                                                                                                                                                                                                                                                                                                                                                                                                                                                                                                                                | <p>Sites of 14-3-3 binding not defined. NO WEBLOGO.</p> |

|                                                                                                                                                                                                                                                                                                                                                                                                                                                                                                                                                                                                                                                                                                                                                                                                                                                                                                                                                                                                           |                                                         |
|-----------------------------------------------------------------------------------------------------------------------------------------------------------------------------------------------------------------------------------------------------------------------------------------------------------------------------------------------------------------------------------------------------------------------------------------------------------------------------------------------------------------------------------------------------------------------------------------------------------------------------------------------------------------------------------------------------------------------------------------------------------------------------------------------------------------------------------------------------------------------------------------------------------------------------------------------------------------------------------------------------------|---------------------------------------------------------|
| <p><b>Plant proteins reported to interact directly with 14-3-3</b></p>                                                                                                                                                                                                                                                                                                                                                                                                                                                                                                                                                                                                                                                                                                                                                                                                                                                                                                                                    |                                                         |
| <p><b>Arabidopsis AKR2</b> (Ankyrin repeat-containing protein 2 (U70425))</p> <p>1 MASNSEKNPL LSDEKPKSTE ENKSSKPESA SGSSTSSAMP GLNFNAFDFS NMASILNDPS<br/>61 IREMAEQIAK DPAFNQLAEQ LQRSIPNAGQ EGGFPNFDPO QVNTMQQVM HNPEFKTMAE<br/>121 KLG TALVQDP QMSPF LDAFS NPETAEHFTE RMARMKEDPE LKPILDEIDA GGPSAMMKYV<br/>181 NDPEVLKKLK EAMGMPVAGL PDQTVSAEPE VAEEGEEEEE IVHQ TASLGD VEGLKAALAS<br/>241 GGNKDEEDSE GRTALHFACG YGELKCAQVL IDAGASVNAV DKNKNTPLHY AAGYGRKESV<br/>301 SLLLENGAAV TLQNLDEKTP IDVAKLNSQL EVVKLLEKDA FL</p> <p><b>Notes</b><br/>Yeast 2-hybrid screen. 14-3-3 binding site not identified.</p> <p><b>References to 14-3-3 binding to AKR2</b><br/>Yan J, Wang J, Zhang H (2002) An ankyrin repeat-containing protein plays a role in both disease resistance and antioxidation metabolism. <i>Plant J</i> 29:193–202</p>                                                                                                                                                                     | <p>Sites of 14-3-3 binding not defined. NO WEBLOGO.</p> |
| <p><b>Arabidopsis APX3</b> (peroxisomal membrane-bound ascorbate peroxidase) (UNIPROT Q42564)</p> <p>1 MAAPIVDAEY LKEITKARRE LRSLIANKNC APIMLRLAWH DAGTYDAQSK TGGPNGSIRN<br/>61 EEEHHTGANS GLKIALDLCE GVKAKHPKIT YADLYQLAGV VAVEVTGGPD IVFVPGRKDS<br/>121 NVCPEGRRLP DAKQGFQHLR DVFYRMGLSD KDIVALS GGH TLGRAHPERS GFDGPWTQEP<br/>181 LKFDNSYFVE LLKGESEGLL KLPTDKTLE DPEFRRLVEL YAKDEDAFFR DYAESHKKLS<br/>241 ELGFNPNSSA GKAVADSTIL QSAFAGVAVA AAVVAFGYFY EIRKRMK</p> <p>&gt;sp Q42564 APX3 ARATH L-ascorbate peroxidase 3, peroxisomal OS=Arabidopsis thaliana GN=APX3 PE=1 SV=1<br/>MAAPIVDAEYLKEITKARRELRSLIANKNCAPIMLRLAWHDAGTYDAQSKTGGPNGSIRN<br/>EEEHHTGANSGLKIALDLCEGVKAKHPKIT YADLYQLAGVVAVEVTGGPDIVFVPGRKDS<br/>NVCPEGRRLPDAKQGFQHLR DVFYRMGLSDKDIVALS GGH TLGRAHPERSGFDGPWTQEP<br/>LKFDNSYFVELLKGESEGLLKLPTDKTLE DPEFRRLVELYAKDEDAFFR DYAESHKKLS<br/>ELGFNPNSSAGKAVADSTILAQSAFAGVAVAAVVAFGYFY EIRKRMK</p> <p><b>Notes</b><br/>Arabidopsis ATF1 (14-3-3) was bait in Y2H and APX3 interacted</p> | <p>Sites of 14-3-3 binding not defined. NO WEBLOGO.</p> |

|                                                                                                                                                                                                                                                                                                                                                                                                                                                                                                                                                                                                                                                                                                                                                                                                                                                                                                                                                                                                                                                                                                                                                                                                                                                                                                                                                                                                                                                                                                                                                                                                                                                                                                                                                                                                                                                                                                                                                                                                                                                                                                                                                                                                                                                                                                                                                                                                                                                                                                                                                                       |                                                         |
|-----------------------------------------------------------------------------------------------------------------------------------------------------------------------------------------------------------------------------------------------------------------------------------------------------------------------------------------------------------------------------------------------------------------------------------------------------------------------------------------------------------------------------------------------------------------------------------------------------------------------------------------------------------------------------------------------------------------------------------------------------------------------------------------------------------------------------------------------------------------------------------------------------------------------------------------------------------------------------------------------------------------------------------------------------------------------------------------------------------------------------------------------------------------------------------------------------------------------------------------------------------------------------------------------------------------------------------------------------------------------------------------------------------------------------------------------------------------------------------------------------------------------------------------------------------------------------------------------------------------------------------------------------------------------------------------------------------------------------------------------------------------------------------------------------------------------------------------------------------------------------------------------------------------------------------------------------------------------------------------------------------------------------------------------------------------------------------------------------------------------------------------------------------------------------------------------------------------------------------------------------------------------------------------------------------------------------------------------------------------------------------------------------------------------------------------------------------------------------------------------------------------------------------------------------------------------|---------------------------------------------------------|
| <p>117 – 122 is a possible motif for 14-3-3 binding but was not tested<br/> In vitro binding of bacterially expressed proteins found no interaction of ATF1 (14-3-3) and APX3 but they admit that the protein may not be phosphorylated in this system<br/> <b>References to 14-3-3 binding to APX3</b><br/> Zhang H, Wang J, Nickel U, Allen RD, Goodman HM. Cloning and expression of an Arabidopsis gene encoding a putative peroxisomal ascorbate peroxidase. <i>Plant Mol Biol.</i> 1997 Aug;34(6):967-71..</p>                                                                                                                                                                                                                                                                                                                                                                                                                                                                                                                                                                                                                                                                                                                                                                                                                                                                                                                                                                                                                                                                                                                                                                                                                                                                                                                                                                                                                                                                                                                                                                                                                                                                                                                                                                                                                                                                                                                                                                                                                                                  |                                                         |
| <p><b>Arabidopsis BZR1</b> Brassinosteroid receptor (Brassinazole-resistant 1) (Swissprot = Q8S307)<br/> 1 MTSDGATSTS AAAAAAAAAA ARRKPSWRER ENNRERRRRR RAVAAKIYTG LRAQGDYINLP<br/> 61 KHCDNNEVLK ALCVEAGWV EEDGTTYRKG CKPLPGEIAG TSSRVTPYSS QNQSPLSSAF<br/> 121 QSPIPSYQVS PSSSSFPSPS RGEPNMMS TFFPFLRNGG IPSSLPLSLRI SN<sup>S</sup>CPVTPPV<br/> 181 SSPTSKNPKP LPNWESI AKQ SMAIAKQ SMA SFNYFFYAVS APASPTH RHQ FHTPATIPEC<br/> 241 DESDSSTVDS GHWISFQKFA QQPFASMV PTSPTFNLVK PAPQQMSPT AAFQEIQSS<br/> 301 EFKFENSQVK PWEGERIHDV GMEDELETLG NGKARG<br/> &gt;gi 57012606 sp Q8S307.1 BZR1_ARATH RecName: Full=Protein BRASSINAZOLE-RESISTANT 1; AltName: Full=Protein BIN2 SUBSTRATE 2<br/> MTSDGATSTSAAAAAAAAAARRKPSWRERENNRERRRRRAVAAKIYTG LRAQGDYINLPKHCDNNEVLK<br/> ALCVEAGWVVEEDGTTYRKGCKPLPGEIAGTSSRVTPYSSQNQSPLSSAFQSPIPSYQVSPSSSSFPSPS<br/> RGEPNMMSSTFFPFLRNGGIPSSLPLSLRISNSCPVTPPVSSPTSKNPKPLPNWESI AKQ SMAIAKQ SMA<br/> SFNYFFYAVSAPASPTH RHQFHTPATIPECDESDSSTVDSGHWISFQKFAQQPFASMVPTSPTFNLVK<br/> PAPQQMSPTAAAFQEIQSSSEFKFENSQVKPWEGERIHDV GMEDELETLGNGKARG<br/> <b>Notes</b><br/> The 14-3-3-binding site reported in Gampala et al (2007) is PSLRISN(pS)CPVTP in the Arabidopsis protein. BIN2-catalyzed phosphorylation of BZR1/BZR2 not only inhibits DNA binding, but also promotes binding to the 14-3-3 proteins. Mutations of a BIN2-phosphorylation site in BZR1 (PSLRISN(pS)CPVTP) abolish 14-3-3 binding and lead to increased nuclear localization of BZR1 protein and enhanced BR responses in transgenic plants (Gampala et al 2007).<br/> Mutation of a putative 14-3-3-binding site of OsBZR1 (152RVSS(pS)AP158) abolished its interaction with the 14-3-3 proteins in yeast and in vivo. (Bai et al 2007).<br/> <b>References to 14-3-3 binding to Arabidopsis and rice BZR1</b><br/> Gampala SS, Kim TW, He JX, Tang W, Deng Z, Bai MY, Guan S, Lalonde S, Sun Y, Gendron JM, Chen H, Shibagaki N, Ferl RJ, Ehrhardt D, Chong K, Burlingame AL, Wang ZY. An essential role for 14-3-3 proteins in brassinosteroid signal transduction in Arabidopsis. <i>Dev Cell.</i> 2007 Aug;13(2):177-89.<br/> Ryu H, Kim K, Cho H, Park J, Choe S, Hwang I. Nucleocytoplasmic shuttling of BZR1 mediated by phosphorylation is essential in Arabidopsis brassinosteroid signaling. <i>Plant Cell.</i> 2007 Sep;19(9):2749-62.<br/> Bai MY, Zhang LY, Gampala SS, Zhu SW, Song WY, Chong K, Wang ZY. Functions of OsBZR1 and 14-3-3 proteins in brassinosteroid signaling in rice. <i>Proc Natl Acad Sci U S A.</i> 2007 Aug 21;104(34):13839-44.</p> |                                                         |
| <p><b>Arabidopsis CaS Calcium-sensing receptor (AY341888)</b><br/> 1 MAMAEMATKS SLSAKLTLPSSSTKKTLSLR QVSVSLPTST SISLLSLFAS PPHEAKAAVS<br/> 61 IPKDQIVSSL TEVEKTINQV QETGSSVFDA TQRVFQVVDG ALKPALDTAL PIAKQAGEEA<br/> 121 MKLASPAFSE ASKKAQEA MQ SSGFDSEPVF NAAKTVDVA QQTSKAIEDA KPIASSTMDT<br/> 181 ISSADPSVIV VAAGAAFLAY LLLPPVFS AI SFNFRGYKGD LTPAQTLDDL CTKNYLMVDI<br/> 241 RSEKDKKAG IPRLPSNAKN RVISIPLEEL PNKVKGIVRN SKRVEAETIAA LKISYLKKN<br/> 301 KGSNIIILDS YTDSAKIVAK TLKVLGYKNC YIVTDGFGSGG RGWLQSR LGT DSYNFSFAQV<br/> 361 LSPSRIIPAA SRSFGTRSGT KFLPSSD<br/> &gt;tr Q9FN48 Q9FN48_ARATH Emb CAB75797.1 OS=Arabidopsis thaliana GN=CaS PE=2 SV=1<br/> MAMAEMATKSSLSAKLTLPSSSTKKTLSLRQVSVSLPTST SISLLSLFASPPHEAKAAVS<br/> IPKDQIVSSL TEVEKTINQVQETGSSVFDA TQRVFQVVDG ALKPALDTAL PIAKQAGEEA<br/> MKLASPAFSEASKKAQEA MQ SSGFDSEPVFNAAKTVDVA QQTSKAIEDAKPIASSTMDT<br/> ISSADPSVIVVAAGAAFLAY LLLPPVFS AISFNFRGYKGD LTPAQTLDDLCTKNYLMVDI<br/> RSEKDKKAGI PRLPSNAKN RVISIPLEEL PNKVKGIVRNSKRVEAETIAA LKISYLKKN<br/> KGSNIIILDSY TDSAKIVAK TLKVLGYKNC YIVTDGFGSGGRGWLQSR LGT DSYNFSFAQV<br/> LSPSRIIPAA SRSFGTRSGTKFLPSSD<br/> <b>Notes</b><br/> 14-3-3 binding site not strictly defined i.e. no direct experimental evidence<br/> The phosphorylation level of CaS responded strongly to light intensity. The light-dependent thylakoid protein kinase STN8 is required for CaS phosphorylation (assessed by LC-MS/MS of stn8 knockout plants). The phosphorylation site was mapped to the stroma-exposed Thr380, located in a motif for interaction with 14-3-3 proteins and proteins with forkhead-associated domains, which suggests the involvement of CaS in stress responses and signaling pathways. The knockout Arabidopsis lines revealed a significant role for CaS in plant growth and development. VLSPSRIIPAA SRSFGTRSGTKFLPSSD – T380<br/> <b>References to 14-3-3 binding to Arabidopsis CaS</b><br/> Vainonen JP, Sakuragi Y, Stael S, Tikkanen M, Allahverdiyeva Y, Paakkari V, Aro E, Suorsa M, Scheller HV, Vener AV, Aro EM. Light regulation of CaS, a novel phosphoprotein in the thylakoid membrane of Arabidopsis thaliana. <i>FEBS J.</i> 2008 Apr;275(8):1767-77.</p>                                                                                                                                                                                                                                                                                                                                                                 | <p>Sites of 14-3-3 binding not defined. NO WEBLOGO.</p> |
| <p><b>Arabidopsis CDPK (calcium-dependent protein kinase) – NP_196107.1</b><br/> 1 MGNTCVGPSR NGFLQSVSAA MWRPRDGDSS ASMSNGDIAS EAVSGELRSR LSDEVQNKPP<br/> 61 EQVTMPKPGT DVE TKDREIR TE<sup>S</sup>KPETLEE ISLESKPETK QETKSETKPE SKPDPPAKPK<br/> 121 KPKHMKRVSS AGLRTEFVLQ RKTENFKEFY SLGRKLGQGG FGTTFLCVEK TTGKEFACKS<br/> 181 IAKRRLTDE DVEDVRREIQ IMHHLGHPN VISIKGAYED VVAHVLMVEC CAGGELFDRI<br/> 241 IQRGHYTERK AAELTRTIVG VVEACHSLGV MHRDLKPENF LRVSKHEDSL LKTIDFGLSM<br/> 301 FFKPDDVFTD VVGSPYYVAP EVLRKRYGPE ADVMSAGVIV YILLSGVPPF WAETEQQGIFE<br/> 361 QVLHGDLDFS SDPWPSISES AKDLVRKMLV RDPKRLTAH QVLCHPWVQV DGVAPDKPLD<br/> 421 SAVLSRMKQF SAMNKFKKMA LRVIAESLSE EEIAGLKEMF NMIDADKSGQ ITFEELKAGL<br/> 481 KRVGANLKES EILDLMQAAD VDNSTGIDYK EFIAATLHLN KIEREDHLFA AFTYFDKDG<br/> 541 GYITPDELQ ACEEFGVEDV RIEELMRDVD QDNDGRIDYN EFMAMQKGS ITGGPVKMLG</p>                                                                                                                                                                                                                                                                                                                                                                                                                                                                                                                                                                                                                                                                                                                                                                                                                                                                                                                                                                                                                                                                                                                                                                                                                                                                                                                                                                                                                                                                                                                                                                                                                                                                                                     | <p>Sites of 14-3-3 binding not defined. NO WEBLOGO.</p> |

|                                                                                                                                                                                                                                                                                                                                                                                                                                                                                                                                                                                                                                                                                                                                                                                                                                                                                                                                                                                                                                                                                                                                                                                                                                                                                                                                                                                                                                                                                                                                                                                                                                                                                                                                                                                                                                                                                                                                                                                                                                                                                                                                                                                                                                                                                                                                                              |                                                             |
|--------------------------------------------------------------------------------------------------------------------------------------------------------------------------------------------------------------------------------------------------------------------------------------------------------------------------------------------------------------------------------------------------------------------------------------------------------------------------------------------------------------------------------------------------------------------------------------------------------------------------------------------------------------------------------------------------------------------------------------------------------------------------------------------------------------------------------------------------------------------------------------------------------------------------------------------------------------------------------------------------------------------------------------------------------------------------------------------------------------------------------------------------------------------------------------------------------------------------------------------------------------------------------------------------------------------------------------------------------------------------------------------------------------------------------------------------------------------------------------------------------------------------------------------------------------------------------------------------------------------------------------------------------------------------------------------------------------------------------------------------------------------------------------------------------------------------------------------------------------------------------------------------------------------------------------------------------------------------------------------------------------------------------------------------------------------------------------------------------------------------------------------------------------------------------------------------------------------------------------------------------------------------------------------------------------------------------------------------------------|-------------------------------------------------------------|
| <p>601 EKSFSTALKL</p> <p>&gt;gi 15238353 ref NP_196107.1  CPK1 (CALCIUM DEPENDENT PROTEIN KINASE 1); calmodulin-dependent protein kinase/ kinase [Arabidopsis thaliana]</p> <p>MGNTCVGSPSRNGLFQSVSAAMWRPRDGDSSASMSNGDIASEAVSGELRSRLSDEVQNKPPQVTMPKPGT DVETKDREIRTESKPETLEEISLESKPEKQETKSEKPKPDPKAKPKPKPKHMKRVSSAGLRTESVLQ RKTENFKEFYSLGRKLGQGGQFGTFLCVEKTTGKEFACKS IAKRLLTDEDEVDRREIQIMHHLGHPN VISIKGAYEDVVAVHLVMECCAGGELFDRI IQRGHYTERKAAELTRTIVGVVEACHSLGVMHRDLKPFEN LFKVSKHEDSLLKTDIFGLSMFFKPDVFTDVGSPYYVAPEVLRKRYGPEADVWSAGVIVYILLSGVPPF WAETEQQGIFEQVLHGDLDFFSSDPWPSISESAKDLVRKMLVRDPKRLTAHQVLCWPVQVDGVPADKPLD SAVLSRMKQFSAMNFKKMLALRVIAESLSEEEIAGLKEMFNMI DADKSGQITFEELKAGLKRKRVGANLKES EILDLMQAADVDSNGTIDYKEFIAATLHLNKIEREDHLFAAFTYFDKDGSGYITPDELQQACEEFGVEDV RIEELMRDQDNDGRIDYNEFVAMMQKGSITGGPVKMGLEKSFSTALKL</p> <p><b>Notes</b><br/>Used a solution of radiolabelled Arabidopsis CPK-1 for an overlay to probe three separate GF-14 (14-3-3) isoforms that had been separated by SDS-PAGE to show that CPK-1 bound 14-3-3s<br/>GST-CPK1 was immobilised on agarose beads and purified GF-14 bound but this was greatly reduced when the Raf259 phosphopeptide was included in the assay.<br/>14-3-3 isoforms stimulated the kinase activity of CPK-1 by up to 2-fold in the presence of calcium in in vitro phosphoprylations of MBP.<br/>Site(s) of 14-3-3 binding not defined but the authors note a 14-3-3 motif at <b>S83</b></p> <p><b>References to 14-3-3 binding to CDPK</b><br/>Camoni L, Harper JF, Palmgren MG. 14-3-3 proteins activate a plant calcium-dependent protein kinase (CDPK). FEBS Lett. 1998 Jul 3;430(3):381-4.</p>                                                                                                                                                                                                                                                                                                                                                                                                                                                                                                                                                                                                                                                                                                       |                                                             |
| <p><b>Arabidopsis CONSTANS</b></p> <p><b>Notes</b><br/>Paper doesn't specify isoform. Sites of 14-3-3 binding not defined<br/>Constans is a central regulator of the photoperiod pathway</p> <p><b>References to 14-3-3 binding to Arabidopsis CONSTANS</b><br/>Mayfield JD, Folta KM, Paul AL, Ferl RJ. The 14-3-3 Proteins mu and upsilon influence transition to flowering and early phytochrome response. Plant Physiol. 2007 Dec;145(4):1692-702.</p>                                                                                                                                                                                                                                                                                                                                                                                                                                                                                                                                                                                                                                                                                                                                                                                                                                                                                                                                                                                                                                                                                                                                                                                                                                                                                                                                                                                                                                                                                                                                                                                                                                                                                                                                                                                                                                                                                                   | <p>Sites of 14-3-3 binding not defined.<br/>NO WEBLOGO.</p> |
| <p><b>Arabidopsis F2KP</b> Arabidopsis 6-phosphofructo-2-kinase/fructose-2,6-bisphosphatase (Swissprot = Q9SP17)</p> <p>1 MSGGASKNTE EDDDGSSNGGG GQLYVSLKME NSKVEGELTP HVYGSPLPLIG SWDPSKALPM<br/>61 QRESALMSEL SFVVPDDET LDFKFLKPK NRNTPCIVEE GENRLLTGG S LQGDARLALF<br/>121 RLEGDVIVEF RVFINADRVS PIDLATSWRA YRENLPSTV RGIPTDVSINP DPKSAECPLE<br/>181 SLELDLAHYE VPAPAPSANS YLVYAADNAE NPRSLSASGS FRNDSTPKAA QRNSSEDSGVT<br/>241 VDGSPSAKEM TIVVPDSSNI YSAFGEAESK SVETLSPFQQ KDGQKGLFVD RGVGSPRLVK<br/>301 SLSASSFLID TKQIKNSMPA AAGAVAAAAD ADQMLGPKED RHLAIVLVGL PARGKTFTAA<br/>361 KLTRYLRWLGHDTKHFNVGK YRRLKHGVMN SADFFRADNP EGVEARTEVA ALAMEDMIAW<br/>421 MQEGGQVGF DATNSTRVRR NMLMKMAEGK CKIIFLETLC NDERI IERNI RLKIQQSPDY<br/>481 SEEMDFEAGV RDFRDLANY EKVEPVEEG SYIKMIDMVS GNGGQIQVNN ISGYLPGRIV<br/>541 FFLVNTHLTP RPILLTRHGE SMDNVRGRIG GDSVSDSGK LYAKKLASFV EKRLKSEKAA<br/>601 SIWTSTLQRT NLTASSIVGF PKVQWRALAE INAGVCDGMT YEEVKNMPE EYESRKKDKL<br/>661 RYRYPRGES YLDVIQRLEPV IIELEQRAP VVVIHQAVL RALYAYFADR PLKEIPQIEM<br/>721 PLHTIIEIQM GVSQVQEKRY KLMD</p> <p>&gt;gi 75206988 sp Q9SP17 Q9SP17_ARATH Fructose-6-phosphate 2-kinase/fructose-2,6-bisphosphatase</p> <p>MSGGASKNTEEDDDGSSNGGGGQLYVSLKME NSKVEGELTPHVYGSPLPLIGSWDPSKALPMQRESALMSEL SFVVPDDETLDLDFKFLKPKNRNTPCIVEE GENRLLTGGSLQGDARLALFRLEGDVIVEFRVFINADRVS PIDLATSWRAYRENLPSTV RGIPTDVSINPDKSAECPLE SLELDLAHYEVPAPAPSANS YLVYAADNAE NPRSLSASGSFRNDSTPKAAQRNSSEDSGVTVDGSPSAKEMTIVVPDSSNI YSAFGEAESKSVETLSPFQQ KDGQKGLFVDRGVGSPRLVKSLSASSFLIDTKQIKNSMPA AAGAVAAAADADQMLGPKEDRHLAIVLVGL PARGKTFTAAKLTRYLRWLGHDTKHFNVGKYRRLKHGVMNSADFFRADNPEGVEARTEVAALAMEDMIAW MQEGGQVGF DATNSTRVRRNMLMKMAEGKCKIIFLETLC NDERI IERNI RLKIQQSPDY SEEMDFEAGV RDFRDLANYEKVEPVEEGSYIKMIDMVS GNGGQIQVNN ISGYLPGRIV FFLVNTHLTPRPILLTRHGE SMDNVRGRIGGDSVSDSGKLYAKKLASFVEKRLKSEKAA SIWTSTLQRTNLTASSIVGF PKVQWRALAE INAGVCDGMTYEEVKNMPEEYESRKKDKLRYRYPRGES YLDVIQRLEPV IIELEQRAPVVVIHQAVL RALYAYFADRPLKEIPQIEM PLHTIIEIQM GVSQVQEKRY KLMD</p> <p><b>Notes</b><br/>SLSASGpS<sup>220</sup>FR, RLVKSLpS<sup>303</sup>ASSF</p> <p><b>References to 14-3-3 binding to F2KP</b><br/>Kulma A, Villadsen D, Campbell DG, Meek SE, Harthill JE, Nielsen TH, MacKintosh C. Phosphorylation and 14-3-3 binding of Arabidopsis 6-phosphofructo-2-kinase/fructose-2,6-bisphosphatase. Plant J. 2004 Mar;37(5):654-67.</p> |                                                             |
| <p><b>Arabidopsis KAT1</b></p> <p><b>Notes</b><br/>14-3-3 has been implicated in the regulation of two specific K<sup>+</sup> channels, AtTPK1 (KCO1), a vacuolar membrane localized K<sup>+</sup> channel [45] and KAT1, a PM inward rectifying K<sup>+</sup> channel [46].</p> <p><b>References to 14-3-3 binding to Arabidopsis KAT1</b><br/>Sottocornola B, Gazzarrini S, Olivari C, Romani G, Valbuzzi P, Thiel G, Moroni A. 14-3-3 proteins regulate the potassium channel KAT1 by dual modes. Plant Biol (Stuttg). 2008 Mar;10(2):231-6.<br/>Sottocornola B, Visconti S, Orsi S, Gazzarrini S, Giacometti S, Olivari C, Camoni L, Aducci P, Marra M, Abenavoli A, Thiel G, Moroni A. The potassium channel KAT1 is activated by plant and animal 14-3-3 proteins. J Biol Chem. 2006 Nov 24;281(47):35735-41.</p>                                                                                                                                                                                                                                                                                                                                                                                                                                                                                                                                                                                                                                                                                                                                                                                                                                                                                                                                                                                                                                                                                                                                                                                                                                                                                                                                                                                                                                                                                                                                      | <p>Sites of 14-3-3 binding not defined.<br/>NO WEBLOGO.</p> |
| <p><b>Arabidopsis KCO1</b></p> <p>1 MSSDAARTPL LPTEKIDTMA QDFNLNSRST SSRKRLRRS R<sup>5</sup>APRGDCMY NDDVKIDEPP<br/>61 PHPSKIPMFS DLNPNLRRVI MFLALYLTTIG TLCFYLRVDQ ISGHKTSQV DALYFCIVTM<br/>121 TTVGYGDLVP NSSASRLAC AFVFSGMVLV GHLLSRAADY LVEKQEALLV RAFHLRQSFQ</p>                                                                                                                                                                                                                                                                                                                                                                                                                                                                                                                                                                                                                                                                                                                                                                                                                                                                                                                                                                                                                                                                                                                                                                                                                                                                                                                                                                                                                                                                                                                                                                                                                                                                                                                                                                                                                                                                                                                                                                                                                                                                                        |                                                             |

|                                                                                                                                                                                                                                                                                                                                                                                                                                                                                                                                                                                                                                                                                                                                                                                                                                                                                                                                                                                                                                                                                                                                                                                                                                                                                                                                                                                                                                                                                                                                                                                                                                                                                                                                                                                                                                                                                                                                                                   |  |
|-------------------------------------------------------------------------------------------------------------------------------------------------------------------------------------------------------------------------------------------------------------------------------------------------------------------------------------------------------------------------------------------------------------------------------------------------------------------------------------------------------------------------------------------------------------------------------------------------------------------------------------------------------------------------------------------------------------------------------------------------------------------------------------------------------------------------------------------------------------------------------------------------------------------------------------------------------------------------------------------------------------------------------------------------------------------------------------------------------------------------------------------------------------------------------------------------------------------------------------------------------------------------------------------------------------------------------------------------------------------------------------------------------------------------------------------------------------------------------------------------------------------------------------------------------------------------------------------------------------------------------------------------------------------------------------------------------------------------------------------------------------------------------------------------------------------------------------------------------------------------------------------------------------------------------------------------------------------|--|
| <p>181 PTDILKELHT NKLRYKCYAT CLVLVLFVIV GTIFLVMVEK MPVISAFYCV CSTVTTLGYG<br/> 241 DKSFNSEAGR LFAVFWILTS SICLAQFFLY VAELENENKQ RALVKWVLRTR RITNNDLEAA<br/> 301 DLDEDEGVVGA AEFIVYKLEKE MGKIDEKDIS GIMDEFEQLD YDESGTLTTS DIVLAQTTSQ<br/> 361 IQR</p> <p>&gt;gi 30696631 ref NP_851196.1  ATKCO1; calcium-activated potassium channel/ ion channel/ outward rectifier potassium channel [Arabidopsis thaliana]<br/> MSSDAARTPLLPTEKIDTMAQDFNLNSRTSSSRKRLRRRSAPRGDCMYNDDVKIDEPPHPSKIPMFS<br/> DLNPNLRRVIMFLALYLTIGTLCFYLVLDQISGHKTSQVVDALYFCIVTMTTVGYGDLVLPNSSASRLLAC<br/> AFVFSGMVLVGHLLSRAADYLVEKQEQALLVRAFHLRQSFSGPTDILKELHTNKLRYKCYATCLVLVLFVIV<br/> GTIFLVMVEKMPVISAFYCVCSSTVTTLGYGDKSFNSEAGRLFAVFWILTS SICLAQFFLYVAELNENKQ<br/> RALVKWVLRTRITNNDLEAADLDEDEGVVGA AEFIVYKLEKEMGKIDEKDISGIMDEFEQLDYDESGTLTTS<br/> DIVLAQTTSQIQR</p> <p><b>Notes</b><br/> KCO1 is a calcium-binding, calcium-activated channel<br/> S42A mutant no longer co-localises with 14-3-3 in the vacuole.<br/> More 14-3-3 co-purifies with GST-KCO1 N-terminus that has been phosphorylated in vitro with PKB than the S42A or non-phos. Interacts preferentially with GRF6, (14-3-3). 14-3-3 binding has no effect on localisation<br/> Channel is activated by 14-3-3 binding in patch clamp measurements.<br/> 14-3-3 has been implicated in the regulation of two specific K<sup>+</sup> channels, AtTPK1 (KCO1), a vacuolar membrane localized K<sup>+</sup> channel [45] and KAT1, a PM inward rectifying K<sup>+</sup> channel [46].<br/> DFNLNSRTSSSRKRLRRRSAPRGDCMYNDDVKIDEPPH</p> <p><b>References to 14-3-3 binding to Arabidopsis KCO1</b><br/> Latz A, Becker D, Hekman M, Müller T, Beyhl D, Marten I, Eing C, Fischer A, Dunkel M, Bertl A, Rapp UR, Hedrich R. TPK1, a Ca(2+)-regulated Arabidopsis vacuole two-pore K(+) channel is activated by 14-3-3 proteins. Plant J. 2007 Nov;52(3):449-59.</p>                                                                    |  |
| <p><b>Arabidopsis KCO1</b> AtTPK1 Ca(2+)-regulated Arabidopsis vacuole two-pore K(+) channel (Swissprot = Q8LBL1)<br/> 1 MSSDAARTPL LPTEKIDTMA QDFNLNSRTS SSRKRLRRS R<sup>5</sup>APRGDCMY NDDVKIDEPP<br/> 61 PPHSKIPMFS DLNPNLRRVI MFLALYLTIG TFCFYLVLDQ ISGHKTSQVVDALYFCIVTMTTVGYGDLVLPNSSASRLLAC<br/> 121 TTVGYGDLVP NSSASRLLAC AFVFSGMVLV GHLLSRAADY LVEKQEQALLV RAFHLRQSFSG<br/> 181 PTDILKELHT NKLRYKCYAT CLVLVLFVIV GTIFLVMVEK MPVISAFYCV CSTVTTLGYG<br/> 241 DKSFNSEAGR LFAVFWILTS SICLAQFFLY VAELENENKQ RALVKWVLRTR RITNNDLEAA<br/> 301 DLDEDEGVVGA AEFIVYKLEKE MGKIDEKDIS GIMDEFEQLD YDESGTLTTS DIVLAQTTSQ<br/> 361 IQR</p> <p>&gt;gi 38604893 sp Q8LBL1.2 KCO1_ARATH RecName: Full=Calcium-activated outward-rectifying potassium channel 1; Short=AtKCO1<br/> MSSDAARTPLLPTEKIDTMAQDFNLNSRTSSSRKRLRRRSAPRGDCMYNDDVKIDEPPHPSKIPMFS<br/> DLNPNLRRVIMFLALYLTIGTLCFYLVLDQISGHKTSQVVDALYFCIVTMTTVGYGDLVLPNSSASRLLAC<br/> AFVFSGMVLVGHLLSRAADYLVEKQEQALLVRAFHLRQSFSGPTDILKELHTNKLRYKCYATCLVLVLFVIV<br/> GTIFLVMVEKMPVISAFYCVCSSTVTTLGYGDKSFNSEAGRLFAVFWILTS SICLAQFFLYVAELNENKQ<br/> RALVKWVLRTRITNNDLEAADLDEDEGVVGA AEFIVYKLEKEMGKIDEKDISGIMDEFEQLDYDESGTLTTS<br/> DIVLAQTTSQIQR</p> <p><b>Notes</b><br/> Co-localization of wild-type TPK1, but not the TPK1-S42A mutant, indicates that phosphorylation of the 14-3-3 binding motif of TPK1 represents a prerequisite for interaction.</p> <p><b>References to 14-3-3 binding to AtKCO1</b><br/> Latz A, Becker D, Hekman M, Müller T, Beyhl D, Marten I, Eing C, Fischer A, Dunkel M, Bertl A, Rapp UR, Hedrich R.<br/> TPK1, a Ca(2+)-regulated Arabidopsis vacuole two-pore K(+) channel is activated by 14-3-3 proteins. Plant J. 2007 Nov;52(3):449-59.<br/> Dunkel M, Latz A, Schumacher K, Müller T, Becker D, Hedrich R. Targeting of Vacuolar Membrane Localized Members of the TPK Channel Family. Mol Plant. 2008 Nov;1(6):938-49.</p>                                                         |  |
| <p><b>Arabidopsis NIA1</b> (NR1, Arabidopsis nitrate reductase 1) (Swissprot = P11832)<br/> 1 MATSVDNRRHY PTMNGVAHAF KPPLVPSPRS FDRHRHQQT LDVILTETKI VKETEVIITV<br/> 61 VDSYDDSSSD DEDESHNRNV PYYKELVKKS NSDLEPSILD PRDESTADSW IQRNSSMLRL<br/> 121 TGKHPFNAEA PLPRLMHHGF ITPVPLHYVR NHGAVPKANW SDWSIEITGL VKRPAKFTME<br/> 181 ELISEFFSRE FVPTLVCAGN RRKEQNMVKQ TIGFNWGSAG VSTSLWKGIPLSEILRRCGI<br/> 241 YSRRGGALNV CFEGAEDLPG GGSKYGTISI KKEMAMDPAR DII LAYMQNG ELLTPDHGFP<br/> 301 VRVIVPGFIG GRMVKWLKRI IVTPQESDSY YHYKDNRLVP SLVDAELANS EAWWYKPEYI<br/> 361 INELNINSVI TTPGHAEILP INAF<sup>1</sup>TQKPY TLKGYAYSGG GKKVTRVEVT LDGGDTWSVC<br/> 421 ELDHQEKPNK YGKFWCWFV SLDVEVLDDL SAKDVAVRAW DESFNTQPK LIWNLGMGMN<br/> 481 NCWFRIRTNV CKPHRGEIGI VFEHPTRPGN QSGGWMMAKER QLEISS<sup>5</sup>ESN TLKKS<sup>5</sup>SPF<br/> 541 MNTASKMYSI SEVRKHNTAD SAWIIVHGH IYDCTRFLKDH PGGTDSILIN AGTDC<sup>2</sup>TEEFE<br/> 601 AIHSDKAKKL LEDYRIGELI TTGYDSSPNV SVHGASNFGP LLAPIKELTP QKNIALVNPR<br/> 661 EKIPVRLIEK TSISHDVRKF RFALPSEDQO LGLFVKGHVF VCANINDKLC LRAYTPTS<sup>1</sup>AI<br/> 721 DAVGHIDLNV VVYFKDVHPR FPNGGLMSQH LDSLPIGSMI DIKGPLGHIE YKGNFPLVS<br/> 781 GKPKFAKKLA MLAGGTGITP IYQIIQSILS DPEDETEMYV VYANRTEDDI LVREELEGWA<br/> 841 SKHKERLKIW YVVEIAKEGW SYSTGFITEA VLREHIPEGL EGESLALACG PPPMIQFALQ<br/> 901 PNLEKMGYNV KEDLLIF</p> <p>&gt;gi 21431787 sp P11832.3 NIA1_ARATH RecName: Full=Nitrate reductase [NADH] 1; Short=NR1<br/> MATSVDNRRHYPTMNGVAHAFKPPLVPSPRS FDRHRHQQTLDVILTETKIVKETEVIITVVDSYDDSSSD<br/> DEDESHNRNV PYYKELVKKS NSDLEPSILD PRDESTADSW IQRNSSMLRLTGKHPFNAEA PLPRLMHHGF<br/> ITPVPLHYVRNHGAVPKANWSDWSIEITGLV<sup>1</sup>KRPAKFTMEELISEFFSRE FVPTLVCAGNRRKEQNMVKQ<br/> TIGFNWGSAGVSTSLWKGIPLSEILRRCGIYSRRGGALNVCFEGAEDLPGGGGSKYGTISIKKEMAMDPAR<br/> DII LAYMQNG ELLTPDHGFPVRVIVPGFIGGRMVKWLKRI IVTPQESDSY YHYKDNRLVPSLVDAELANS<br/> EAWWYKPEYI INELNINSVI TTPGHAEILP INAF<sup>1</sup>TQKPY TLKGYAYSGG GKKVTRVEVT LDGGDTWSVC</p> |  |



ELDHQEKPNKYGKFWCWFSLDVEVLDDLAKDVAVRAWDESFNTPQDKLIWNLGMNNCWFRIRTNV  
 CKPHRGEIGIVFEHPTPRGNQSGGWMAKERQLEISSESNNLTKKSVSSPFMNTASKMYSISEVRKHNTAD  
 SAWIIVHGHYDCTRFLKDHDPGGTDSILINAGTCTEEFEAIIHSDKAKKLEDYRIGELITGYSDDSPNV  
 SVHGASNFGLLAPIKELTPQKNIALVNPKEKIPVRLIEKTSISHDVRKFRFALPSEDQQLGLPVGKHFV  
 VCANINDKLCRLAYTPPTSAIDAVGHI DLVVKVYFKDVHPRFPNGGLMSQHLDSLPIGSMIDIKGPLGHIE  
 YKKGKGNFLVSGKPKFAKKLAMLAGGTGITPIYQIIQSILSDPEDETEMYVYANRTEDDILVREELEGWA  
 SKHKERLKIWYVVEITAKEGWSYSTGFITEAVLREHIEPEGLEGESLALACGPPPMIQFALQPNLEKMGYNV  
 KEDLLIF

**Arabidopsis NIA2** (NR2, Arabidopsis nitrate reductase 2) (Swissprot = P11035)

1 MAASVDNRQY ARLEPGLNGV VRSYKPPVPG RSDSPKAHQN QTTNQTVFLK PAKVHDDDED  
 61 VSSEDENETH NSNAVYYKEM IRKSNAELEP SVLDPRDEYT ADSWIERNPS MVRLTGKHPF  
 121 NSEAPLNRLM HHGFITPVPL HYVRNHGHVP KAQWAEWTV EGTGFKRPMK FTMDQLVSEF  
 181 AYREFAATLV CAGNRRKEQN MVKSKGFNW GSAGVSTSVW RGVPLCDVLR RCGIFSRKGG  
 241 ALNVCFEQSE DLPGGAGTAG SKYGTSTIKKE YAMDPSTRDI LAYMQNGEYL TPDHGFPPVRI  
 301 IIPGFIGGRM VKWLKRIIVT TKESDNFYHF KDNRVLP SLV DAELADEEGW WYKPEYIINE  
 361 LNINSVITTP CHEEILPINA FTTQRPYTLK GYAYSGGGKK VTRVEVTVDG GETWNVCALD  
 421 HQEKPNKYGK FWCWCFWSLE VEVLDDLAK EIAVRAWDET LNTQPEKMIW NLMGMNNCW  
 481 FRVKTNVCKP HKGEIGIVFE HPTLPGNESG GWMAKERHLE KSADAPPSLK KSVSTPFMNT  
 541 TAKMYSMSEV KKHNSADSCW IIVHGHYDC TRFLMDHPGG SDSILINAGT DCTEEFEAIIH  
 601 SDKAKKLED YRIGELITTG YSSDSSSPNN SVHGSSAVFS LLAPIGEATP VRNALVNPR  
 661 AKVPVQLVEK TSISHDVRKF RFALPVEDMV LGLPVGKHIF LCATINDKLC LRAYTPSSTV  
 721 DVVGYFELVV KIYFGGVHPR FPGGGLMSQY LDSLPIGSTL EIKGPLGHVE YLKGKSFVH  
 781 GKPKFADKLA MLAGGTGITP VYQIIQAILK DPEDETEMYV IYANRTEEDI LLREELDGWA  
 841 EQYDRLKVV YVVESAKEGW AYSTGFISEA IMREHIPDGL DGSALAMACG PPPMIQFAVQ  
 901 PNLEKMQYNI KEDFLIF

>gi|128188|sp|P11035.1|NIA2\_ARATH RecName: Full=Nitrate reductase [NADH] 2;  
 Short=NR2

MAASVDNRQYARLEPGLNGVRSYKPPVPGRSDSPKAHQNQTTNQTVFLKPAKVHDDDEDVSSEDENETH  
 NSNAVYYKEMIRKSNAELEPSVLDPRDEYTADSWIERNPSMVRLTGKHPFNSEAPLNRLMHHGFITPVPL  
 HYVRNHGHVPKAQWAEWTVETGFKRPMKFTMDQLVSEFAYREFAATLV CAGNRRKEQNMVSKSGFNW  
 GSAGVSTSVWRGVPLCDVLRRCGIFSRKGGALNVCFEQSEDLPGGAGTAGSKYGTSTIKKEYAMDPSTRDI  
 LAYMQNGEYLTDPHGFPPVRI IIPGFIGGRMVKWLKRIIVT TKESDNFYHF KDNRVLP SLV DAELADEEGW  
 WYKPEYIINELNINSVITTPCHEEILPINAFTTQRPYTLKGYAYSGGGKKVTRVEVTVDGGETWNVCALD  
 HQEKPNKYGKFWCWCFWSLEVEVLDDLAK EIAVRAWDET LNTQPEKMIWNLGMNNCWFRVKTNVCKP  
 HKGEIGIVFEHPTLPGNESGGWMAKERHLEKSADAPPSLKKSVSTPFMNTTAKMYSMSEVKKHNSADSCW  
 IIVHGHYDCTRFLMDHPGGSDSILINAGTCTEEFEAIIHSDKAKKLEDYRIGELITGYSDDSSPNN  
 SVHGSSAVFSLLAPIGEATPVRNALVNPRAKVPVQLVEKTSISHDVRKFRFALPVEDMVLGLPVGKHIF  
 LCATINDKLCRLAYTPSSTVDVVGYFELVVKIYFGGVHPRFPNGGLMSQYLDLPIGSTLEIKGPLGHVE  
 YLKGKSFVH GKPKFADKLA MLAGGTGITPVYQIIQAILKDPEDETEMYV IYANRTEEDI LLREELDGWA  
 EQYDRLKVVYVVESAKEGWAYSTGFISEA IMREHIPDGLDGSALAMACGPPPMIQFAVQPNLEKMQYNI  
 KEDFLIF

**Notes**

RTApS<sup>543</sup> TP (Spinach) Arabidopsis NR1 and NR2 isoforms expressed from two genes, taken as representative of all NRs studied. A transgenic *Nicotiana plumbaginifolia* line (S521) has been constructed where the regulatory, conserved Ser 521 of tobacco NR (corresponding to Ser 534 in Arabidopsis) was mutated into Asp.

**References to 14-3-3 binding to nitrate reductase**

Allègre A, Silvestre J, Morard P, Kallerhoff J, Pinelli E. Nitrate reductase regulation in tomato roots by exogenous nitrate: a possible role in tolerance to long-term root anoxia. *J Exp Bot.* 2004 Dec;55(408):2625-34.

Athwal GS, Huber JL, Huber SC. Phosphorylated nitrate reductase and 14-3-3 proteins. Site of interaction, effects of ions, and evidence for an amp-binding site on 14-3-3 proteins. *Plant Physiol.* 1998 Nov;118(3):1041-8.

Athwal GS, Huber SC. Divalent cations and polyamines bind to loop 8 of 14-3-3 proteins, modulating their interaction with phosphorylated nitrate reductase. *Plant J.* 2002 Jan;29(2):119-29.

Bachmann M, Huber JL, Athwal GS, Wu K, Ferl RJ, Huber SC. 14-3-3 proteins associate with the regulatory phosphorylation site of spinach leaf nitrate reductase in an isoform-specific manner and reduce dephosphorylation of Ser-543 by endogenous protein phosphatases. *FEBS Lett.* 1996 Nov 25;398(1):26-30.

Bachmann M, Huber JL, Liao PC, Gage DA, Huber SC. The inhibitor protein of phosphorylated nitrate reductase from spinach (*Spinacia oleracea*) leaves is a 14-3-3 protein. *FEBS Lett.* 1996 Jun 3;387(2-3):127-31.

Campbell WH. NITRATE REDUCTASE STRUCTURE, FUNCTION AND REGULATION: Bridging the Gap between Biochemistry and Physiology. *Annu Rev Plant Physiol Plant Mol Biol.* 1999 Jun;50:277-303.

Douglas P, Moorhead G, Hong Y, Morrice N, MacKintosh C. Purification of a nitrate reductase kinase from *Spinacea oleracea* leaves, and its identification as a calmodulin-domain protein kinase. *Planta.* 1998 Oct;206(3):435-42.

Douglas P, Morrice N, MacKintosh C. Identification of a regulatory phosphorylation site in the hinge 1 region of nitrate reductase from spinach (*Spinacea oleracea*) leaves. *FEBS Lett.* 1995 Dec 18;377(2):113-7.

Douglas P, Pigaglio E, Ferrer A, Halfords NG, MacKintosh C. Three spinach leaf nitrate reductase-3-hydroxy-3-methylglutaryl-CoA reductase kinases that are regulated by reversible phosphorylation and/or Ca<sup>2+</sup> ions. *Biochem J.* 1997 Jul 1;325 ( Pt 1):101-9.

Harthill JE, Meek SE, Morrice N, Pegg MW, Borch J, Wong BH, Mackintosh C. Phosphorylation and 14-3-3 binding of Arabidopsis trehalose-phosphate synthase 5 in response to 2-deoxyglucose. *Plant J.* 2006 Jul;47(2):211-23.

Hirano T, Ito A, Berberich T, Terauchi R, Saitoh H. Virus-induced gene silencing of 14-3-3 genes abrogates dark repression of nitrate reductase activity in *Nicotiana benthamiana*. *Mol Genet Genomics.* 2007 Aug;278(2):125-33.

Ikeda Y, Koizumi N, Kusano T, Sano H. Specific binding of a 14-3-3 protein to autophosphorylated WPK4, an SNF1-related wheat protein kinase, and to WPK4-phosphorylated nitrate reductase. *J Biol Chem.* 2000 Oct 13;275(41):31695-700.

Kaiser WM, Weiner H, Kandlbinder A, Tsai CB, Rockel P, Sonoda M, Planchet E. Modulation of nitrate reductase: some new insights, an unusual case and a potentially important side reaction. *J Exp Bot.* 2002 Apr;53(370):875-82.

|                                                                                                                                                                                                                                                                                                                                                                                                                                                                                                                                                                                                                                                                                                                                                                                                                                                                                                                                                                                                                                                                                                                                                                                                                                                                                                                                                                                                                                                                                                                                                                                                                                                                                                                                                                                                                                                                                                                                                                                                                                                                                                                                                                                                                                                                                                                                                                                                                                                                                                                                                                                                                                                                                                                                                                                                                                                                                                                                                                                                                                                                                                                                                                                                                                                                                                                                                                                                                                                                                                                                                                                                                                                                                                  |                                                          |
|--------------------------------------------------------------------------------------------------------------------------------------------------------------------------------------------------------------------------------------------------------------------------------------------------------------------------------------------------------------------------------------------------------------------------------------------------------------------------------------------------------------------------------------------------------------------------------------------------------------------------------------------------------------------------------------------------------------------------------------------------------------------------------------------------------------------------------------------------------------------------------------------------------------------------------------------------------------------------------------------------------------------------------------------------------------------------------------------------------------------------------------------------------------------------------------------------------------------------------------------------------------------------------------------------------------------------------------------------------------------------------------------------------------------------------------------------------------------------------------------------------------------------------------------------------------------------------------------------------------------------------------------------------------------------------------------------------------------------------------------------------------------------------------------------------------------------------------------------------------------------------------------------------------------------------------------------------------------------------------------------------------------------------------------------------------------------------------------------------------------------------------------------------------------------------------------------------------------------------------------------------------------------------------------------------------------------------------------------------------------------------------------------------------------------------------------------------------------------------------------------------------------------------------------------------------------------------------------------------------------------------------------------------------------------------------------------------------------------------------------------------------------------------------------------------------------------------------------------------------------------------------------------------------------------------------------------------------------------------------------------------------------------------------------------------------------------------------------------------------------------------------------------------------------------------------------------------------------------------------------------------------------------------------------------------------------------------------------------------------------------------------------------------------------------------------------------------------------------------------------------------------------------------------------------------------------------------------------------------------------------------------------------------------------------------------------------|----------------------------------------------------------|
| <p>Kanamaru K, Wang R, Su W, Crawford NM. Ser-534 in the hinge 1 region of Arabidopsis nitrate reductase is conditionally required for binding of 14-3-3 proteins and in vitro inhibition. <i>J Biol Chem.</i> 1999 Feb 12;274(7):4160-5.</p> <p>Lea US, Ten Hoopen F, Provan F, Kaiser WM, Meyer C, Lillo C. Mutation of the regulatory phosphorylation site of tobacco nitrate reductase results in high nitrite excretion and NO emission from leaf and root tissue. <i>Planta.</i> 2004 May;219(1):59-65.</p> <p>Lillo C, Kazazaic S, Ruoff P, Meyer C. Characterization of Nitrate Reductase from Light- and Dark-Exposed Leaves (Comparison of Different Species and Effects of 14-3-3 Inhibitor Proteins). <i>Plant Physiol.</i> 1997 Aug;114(4):1377-1383.</p> <p>Lillo C, Lea US, Leydecker MT, Meyer C. Mutation of the regulatory phosphorylation site of tobacco nitrate reductase results in constitutive activation of the enzyme in vivo and nitrite accumulation. <i>Plant J.</i> 2003 Sep;35(5):566-73.</p> <p>Lillo C, Meyer C, Lea US, Provan F, Oltedal S. Mechanism and importance of post-translational regulation of nitrate reductase. <i>J Exp Bot.</i> 2004 Jun;55(401):1275-82.</p> <p>MacKintosh C, Meek SE. Regulation of plant NR activity by reversible phosphorylation, 14-3-3 proteins and proteolysis. <i>Cell Mol Life Sci.</i> 2001 Feb;58(2):205-14.</p> <p>Moorhead G, Douglas P, Morrice N, Scarabel M, Aitken A, MacKintosh C. Phosphorylated nitrate reductase from spinach leaves is inhibited by 14-3-3 proteins and activated by fusicoccin. <i>Curr Biol.</i> 1996 Sep 1;6(9):1104-13.</p> <p>Nakamura K, Shiraiishi N, Hosoo S, Sueyoshi K, Sugimoto T, Nanmori T, Nakagawa H, Oji Y. A protein kinase activated by darkness phosphorylates nitrate reductase in Komatsuna (<i>Brassica campestris</i>) leaves. <i>Physiol Plant.</i> 2002 Aug;115(4):496-503.</p> <p>Perdomo G, Navarro FJ, Medina B, Machín F, Tejera P, Siverio JM. Tobacco Nia2 cDNA functionally complements a <i>Hansenula polymorpha</i> yeast mutant lacking nitrate reductase. A new expression system for the study of plant proteins involved in nitrate assimilation. <i>Plant Mol Biol.</i> 2002 Oct;50(3):405-13.</p> <p>Pigaglio E, Durand N, Meyer C. A conserved acidic motif in the N-terminal domain of nitrate reductase is necessary for the inactivation of the enzyme in the dark by phosphorylation and 14-3-3 binding. <i>Plant Physiol.</i> 1999 Jan;119(1):219-30.</p> <p>Shen W, Clark AC, Huber SC. The C-terminal tail of Arabidopsis 14-3-3omega functions as an autoinhibitor and may contain a tenth alpha-helix. <i>Plant J.</i> 2003 May;34(4):473-84.</p> <p>Shen W, Huber SC. Polycations globally enhance binding of 14-3-3omega to target proteins in spinach leaves. <i>Plant Cell Physiol.</i> 2006 Jun;47(6):764-71.</p> <p>Sinnige MP, Roobeek I, Bunney TD, Visser AJ, Mol JN, de Boer AH. Single amino acid variation in barley 14-3-3 proteins leads to functional isoform specificity in the regulation of nitrate reductase. <i>Plant J.</i> 2005 Dec;44(6):1001-9.</p> <p>Tsai CB, Kaiser WM, Kaldenhoff R. Molecular cloning and characterization of nitrate reductase from <i>Ricinus communis</i> L. heterologously expressed in <i>Pichia pastoris</i>. <i>Planta.</i> 2003 Oct;217(6):962-70.</p> <p>Tucker DE, Allen DJ, Ort DR. Control of nitrate reductase by circadian and diurnal rhythms in tomato. <i>Planta.</i> 2004 Jun;219(2):277-85.</p> <p>Weiner H, Kaiser WM. Binding to 14-3-3 proteins is not sufficient to inhibit nitrate reductase in spinach leaves. <i>FEBS Lett.</i> 2000 Sep 1;480(2-3):217-20.</p> |                                                          |
| <p><b>Arabidopsis NUDT7 – (in paper = At4g12720)</b></p> <p>1 MGTRAQQIPL LEGETDNYDG VVTVMVEPMD SEVFTESLRA SLSHWREEGK KGIWIKLPLG<br/> 61 LANLVEAAVS EGFYHHAEP EYLMLVSWIS ETPDTIPANA SHVVGAGALV INKNTKEVLV<br/> 121 VQERSGFFKD KNVWKLPTGV INEGEDIWTG VAREVEEETG IIADFVEVLA FRQSHKAILK<br/> 181 KKTDMFFLCV LSPRSYDITE QKSEILQAKW MPIQEYVDQP WNKKNEMFKF MANICQKKCE<br/> 241 EEYLGFAIVP TTTSSGKESF IYCNADHAKR LKVS RDQASA SL</p> <p>&gt;gi 30682219 ref NP_849368.1  NUDT7; ADP-ribose diphosphatase/ NAD or NADH binding / hydrolase/ nucleoside-diphosphatase/ protein homodimerization [Arabidopsis thaliana]</p> <p>MGTRAQQIPLLEGETDNYDGVTVMVEPMDSEVFTESLRASLSHWREEGKKGKIWIKLPLGLANLVEAAVS EGFYHHAEP EYLMLVSWIS ETPDTIPANASHVVGAGALVINKNTKEVLVQERSGFFKDKNVWKLPTGV INEGEDIWTGVAREVEEETGI IADDFVEVLA FRQSHKAILK KKTDMFFLCV LSPRSYDITE QKSEILQAKW MPIQEYVDQP WNKKNEMFKF MANICQKKCE EYLGFAIVP TTTSSGKESF IYCNADHAKR LKVS RDQASA SL</p> <p><b>Notes – 14-3-3 binding sites not well defined see below</b><br/> “Mutant plants deprived of AtNUDT7, exhibit growth retardation, spontaneous cell death and increased resistance to pathogen infection”<br/> <b>Wildtype</b> and <b>V26A</b> mutations had no effect on 14-3-3 binding<br/> <b>V69A</b>, <b>F73A</b> and <b>V168A</b> all had no interaction with 14-3-3 in Y2H assay<br/> 14-3-3 beads pulled out NUDT7 from Arabidopsis cell extracts<br/> F73A and V168A have problems dimerizing and instead aggregate NUDT7<br/> <b>References to 14-3-3 binding to NUDT7</b><br/> Olejnik K, Plochocka D, Grynberg M, Goch G, Gruszecki WI, Basińska T, Kraszewska E. Mutational analysis of the AtNUDT7 Nudix hydrolase from Arabidopsis thaliana reveals residues required for protein quaternary structure formation and activity. <i>Acta Biochim Pol.</i> 2009;56(2):291-300.</p>                                                                                                                                                                                                                                                                                                                                                                                                                                                                                                                                                                                                                                                                                                                                                                                                                                                                                                                                                                                                                                                                                                                                                                                                                                                                                                                                                                                                                                                                                                                                                                                                                                                                                                                                                                                                                                                             | <p>Sites of 14-3-3 binding not defined. NO WEBLOGO.</p>  |
| <p><b>Arabidopsis OMT1</b> caffeic acid/5-hydroxyferulic acid O-methyltransferase</p> <p><b>Notes</b><br/> Sequence not defined.</p> <p><b>References to 14-3-3 binding to OMT1</b><br/> Zhang H, Wang J, Goodman HM. An Arabidopsis gene encoding a putative 14-3-3-interacting protein, caffeic acid/5-hydroxyferulic acid O-methyltransferase. <i>Biochim Biophys Acta.</i> 1997 Sep 12;1353(3):199-202</p>                                                                                                                                                                                                                                                                                                                                                                                                                                                                                                                                                                                                                                                                                                                                                                                                                                                                                                                                                                                                                                                                                                                                                                                                                                                                                                                                                                                                                                                                                                                                                                                                                                                                                                                                                                                                                                                                                                                                                                                                                                                                                                                                                                                                                                                                                                                                                                                                                                                                                                                                                                                                                                                                                                                                                                                                                                                                                                                                                                                                                                                                                                                                                                                                                                                                                   | <p>Sites of 14-3-3 binding not defined. NO WEBLOGO.</p>  |
| <p><b>Arabidopsis PHOT1</b> (Phototropin receptor kinase from Arabidopsis) (Swissprot = O48963)</p> <p>1 MEPTKPKSTK PSSRTLPRDT RGSLEVFNPS TQLTRPDNPV FREPPAWQN LSDPRGTSPQ<br/> 61 PRPQQEPAPS NPVRS DQEIA VTTSMWALDK PSPETISKKT ITAEKPQKSA VAAEQRAAEW<br/> 121 GLVLKTDTKT GKPQGVGVRN SGGTENDPNG KKTTSQRNSQ NSCRSSGEMS DGDVPPGGRSG<br/> 181 IPRVSEDLKD ALSTFQQTFV VSDATKPDYP IMYASAGFFN MTGYTSKEVV GRNCRFLQGS</p>                                                                                                                                                                                                                                                                                                                                                                                                                                                                                                                                                                                                                                                                                                                                                                                                                                                                                                                                                                                                                                                                                                                                                                                                                                                                                                                                                                                                                                                                                                                                                                                                                                                                                                                                                                                                                                                                                                                                                                                                                                                                                                                                                                                                                                                                                                                                                                                                                                                                                                                                                                                                                                                                                                                                                                                                                                                                                                                                                                                                                                                                                                                                                                                                                                                                                  | <p>Three sites implicated in 14-3-3 binding, but not</p> |

|                                                                                                                                                                                                                                                                                                                                                                                                                                                                                                                                                                                                                                                                                                                                                                                                                                                                                                                                                                                                                                                                                                                                                                                                                                                                                                                                                                                                                                                                                                                                                                                                                                                                                                                                                                                                                                                                                                                                                                                                                                                                                                                                                                                                                                                                                                                                                                                                                                                                                                                                                                                                                                                                                                                                                                                                                                                                                                                                                                                                                                                                                                                                                                                                                                                                                                                                                                                                                                                                                                                                                                                                                                                                                                                                                                  |                                                              |
|------------------------------------------------------------------------------------------------------------------------------------------------------------------------------------------------------------------------------------------------------------------------------------------------------------------------------------------------------------------------------------------------------------------------------------------------------------------------------------------------------------------------------------------------------------------------------------------------------------------------------------------------------------------------------------------------------------------------------------------------------------------------------------------------------------------------------------------------------------------------------------------------------------------------------------------------------------------------------------------------------------------------------------------------------------------------------------------------------------------------------------------------------------------------------------------------------------------------------------------------------------------------------------------------------------------------------------------------------------------------------------------------------------------------------------------------------------------------------------------------------------------------------------------------------------------------------------------------------------------------------------------------------------------------------------------------------------------------------------------------------------------------------------------------------------------------------------------------------------------------------------------------------------------------------------------------------------------------------------------------------------------------------------------------------------------------------------------------------------------------------------------------------------------------------------------------------------------------------------------------------------------------------------------------------------------------------------------------------------------------------------------------------------------------------------------------------------------------------------------------------------------------------------------------------------------------------------------------------------------------------------------------------------------------------------------------------------------------------------------------------------------------------------------------------------------------------------------------------------------------------------------------------------------------------------------------------------------------------------------------------------------------------------------------------------------------------------------------------------------------------------------------------------------------------------------------------------------------------------------------------------------------------------------------------------------------------------------------------------------------------------------------------------------------------------------------------------------------------------------------------------------------------------------------------------------------------------------------------------------------------------------------------------------------------------------------------------------------------------------------------------------|--------------------------------------------------------------|
| <p>241 GTDADELAKI RETLAAGNNY CGRILNYKGD GTSFNNLLTI APIKDESGKV LKFIGMQVEV<br/> 301 SKHTFGAKEK ALRPNGLPES LIRYDARQKD MATNSVTELV EAVKRPRALS ESTNLHPFMT<br/> 361 KSESDLPKK PARRMSENVV PSGRNNSGGG RRNSMQRINE IPEKKSRSKSS LSFMGIKKKS<br/> 421 ESLDESIDDG FIEYGEEDDE ISDRDERPES VDDKVRQKEM RKGIDLATTL ERIEKNFVIT<br/> 481 DPRLPDNPPI FASDSFLELT EYSREIILGR NCRFLQGPET DLTTVKKIRN AIDNQTEVTV<br/> 541 QLINYTKSGK KFWNIFHLQP MRDQKGEVQY FIGVQLDGSK HVEPVRNVIE ETAVKEGEDL<br/> 601 VKKTAVNIDE AVRELPDANM TPEDLWANHS KVVHCKPHRK DSPPWIAIQK VLESSEPIGL<br/> 661 KHFKPVKPLG SGTGSGVHLV ELVGTDLQFA MKAMDKAVML NRNKVHRARA EREILDLDH<br/> 721 PFLPALYASF QTKTHICLIT DYPGGELFM LLDRQPRKVL KEDAVRFYAA QVVVALEYLH<br/> 781 CQGIIYRDLK PENVLIQNGG DISLSDFDLS CLTSCKPQLL IPSIDEKSKK KQKKSQQTPI<br/> 841 FMAEPMRASN SFVGTTEEYIA PEIISGAGHT SAVDWWALGI LMYEMLYGYT PFRGKTRQKT<br/> 901 FTNVLQKDLK FPASIPASLQ VKQLIFRLLQ RDPKRLGCF EGANEVKQHS FFKGINWALI<br/> 961 RCTNPPPELET PIFSGEAENG EKVVDPPELED LQTNVF</p> <p>&gt;gi 25090817 sp O48963.1 PHOT1_ARATH RecName: Full=Phototropin-1; AltName: Full=Non-phototropic hypocotyl protein 1; AltName: Full=Root phototropism protein 1</p> <p>MEPTKPKSTKPSRSLPRDTRGSLEVFNPSTQLTRPDNPVFRPEPPAWQNLSDPRGTSPOQPRPQOEPA<br/> NPVRSDDQEIATVTTSMWALKDPSPETISKTTITAEKPKQSAVAEAEQRAEWGLVLKTDTKTKPKPQGVGVRN<br/> SGGTENDPNGKTTQQRNSQNSCRSGEMSDGDVPGGRSGIPRVSEDLKDALSTFQQTFFVSDATKPDYP<br/> IMYASAGFFNMTGYTSKEVVGRCRFLQSGSDDADELAKIRETLAAGNNYCGRILNYKGDGTSFNNLLTI<br/> APIKDESGKVLKFIGMQVEVSKHTFGAKEKALRPNGLPESLIRYDARQKDMATNSVTELV EAVKRPRALS<br/> ESTNLHPFMTKSESDLPKKPARRMSENVVPSGRNNSGGGRRNSMQRINE IPEKKSRSKSSLSFMGIKKS<br/> ESLDESIDDG FIEYGEEDDE ISDRDERPESVDDKVRQKEMRKGIDLATTL ERIEKNFVIT DPRLPDNPPI<br/> FASDSFLELT EYSREIILGRNCRFLQGPETDLTTVKKIRNAIDNQTEVTVQLINYTKSGKFWNIFHLQP<br/> MRDQKGEVQYFIGVQLDGSKHVEPVRNVIEETAVKEGEDLVKKTAVNIDEAVRELPDANMTPEDLWANHS<br/> KVVHCKPHRKDSPPWIAIQK VLESSEPIGLKHFKPVKPLGSGDTGSGVHLVELVGTDLQFA MKAMDKAVML<br/> NRNKVHRARAEREILDLDH PFLPALYASFQTKTHICLITDYPGGELFM LLDRQPRKVLKEDAVRFYAA<br/> QVVVALEYLHCQGI IYRDLKPENVLIQNGGDISLSDFDLSCLTSCKPQLL IPSIDEKSKK KQKKSQQTPI<br/> FMAEPMRASNSFVGTTEEYIAPEIISGAGHTSAVDWWALGILMYEMLYGYTPFRGKTRQKTFTNVLQKDLK<br/> FPASIPASLQVKQLIFRLLQRDPKRLGCFEGANEVKQHSFFKGINWALIRCTNPPPELETPIFSGEAENG<br/> EKVVDPPELEDLQTNVF</p> <p><b>Notes</b><br/> Phospho-serine residues required for 14-3-3 binding to Arabidopsis phot1 have been mapped to the intervening linker region between LOV1 and LOV2. Although mutation of Ser350 and Ser376 to alanine substantially reduced the interaction, residual 14-3-3 <math>\lambda</math> binding to phot1 in response to PKA treatment could still be detected. Mutation of Ser410 to alanine (408KS(pS)LSFMGIK417) abolished this interaction demonstrating an accessory role for this residue in mediating 14-3-3 <math>\lambda</math> binding to phot1 (Sullivan et al 2009). The form of the protein studied by the authors must be different from the reference sequence because the residue numbers are different.</p> <p><b>References to 14-3-3 binding to Phototropin</b><br/> Sullivan S, Thomson CE, Kaiserli E, Christie JM. Interaction specificity of Arabidopsis 14-3-3 proteins with phototropin receptor kinases. FEBS Lett. 2009 Jul 7;583(13):2187-93.<br/> Inoue S, Kinoshita T, Matsumoto M, Nakayama KI, Doi M, Shimazaki K. Blue light-induced autophosphorylation of phototropin is a primary step for signaling. Proc. Natl. Acad. Sci. USA. 2008;105:5626-5631.<br/> Kinoshita T, Emi T, Tominaga M, Sakamoto K, Shigenaga A, Doi M, et al. Blue-light- and phosphorylation-dependent binding of a 14-3-3 protein to phototropins in stomatal guard cells of broad bean. Plant Physiol. 2003;133:1453-1463.</p> | <p>clear which interact directly.<br/> NO WEBLOGO.</p>       |
| <p><b>Arabidopsis photosystem I N-subunit (At pPSI-N, full length precursor)</b></p> <p><b>Notes</b><br/> <b>References to 14-3-3 binding to Arabidopsis photosystem I N-subunit</b><br/> Sehnke PC, Henry R, Cline K, Ferl RJ. Interaction of a plant 14-3-3 protein with the signal peptide of a thylakoid-targeted chloroplast precursor protein and the presence of 14-3-3 isoforms in the chloroplast stroma. Plant Physiol. 2000 Jan;122(1):235-42.</p>                                                                                                                                                                                                                                                                                                                                                                                                                                                                                                                                                                                                                                                                                                                                                                                                                                                                                                                                                                                                                                                                                                                                                                                                                                                                                                                                                                                                                                                                                                                                                                                                                                                                                                                                                                                                                                                                                                                                                                                                                                                                                                                                                                                                                                                                                                                                                                                                                                                                                                                                                                                                                                                                                                                                                                                                                                                                                                                                                                                                                                                                                                                                                                                                                                                                                                    | <p>Sites of 14-3-3 binding not defined.<br/> NO WEBLOGO.</p> |
| <p><b>Arabidopsis PMA1</b> Plasma membrane H<sup>+</sup>-ATPase (Swissprot = P20649)</p> <p>1 MSGLEDIKNE TVDLEKIPIE EVFQQLKCTR EGLTTQEGED RIVIFGPNKL EEKESKILK<br/> 61 FLGFMWNPLS WVMEAAALMA IALANGDNRP PDWQDFVGI CLLVINSTIS FIEENNAGNA<br/> 121 AAALMAGLAP KTKVLRDQGW SEQEAAILVP GDIVSIKLGDI IPADARLLE GDPLKVDQSA<br/> 181 LTGESLPVTK HPGQEVFSGS TCKQGEIEAV VIATGVHTFF GKAAHLVDST NQVGHFQKVL<br/> 241 TSIGNFCICS IAIGIAIEIV VMYPIQHRKY RDGIDNLLVL LIGGIPIAMP TVLSVTMAIG<br/> 301 SHRLSQQGAIT KRMTAIEEM AGMDVLCSDK TGTTLNLKLS VDKNLVEVFC KGVEKQVLL<br/> 361 FAAMASRVEN QDAIDAAMVG MLADPKEARA GIREVHFLFP NPVDKRTALT YIDSDGNWHR<br/> 421 VSKGAPEQIL DLANARPDRL KVLSCIDKY AERGLRSLAV ARQVVPEKTK ESPGGPWEFV<br/> 481 GLLPLFDPPP HDSAETIRRA LNLGVNVKMI TGDQLAIGKE TGRRLLMGMTN MYPSAALLGT<br/> 541 DKDSNIASIP VEELIEKADG FAGVFPEHKY EIVKKLQERK HIVGMTGDGV NDAPALKKAD<br/> 601 IGIAVADATD AARGASDIVL TEPGLSVIIS AVLTSAIFQ RMKNYTIYAV SITIRIVFGF<br/> 661 MLIALIWEFD FSAFMVLIIA ILNDGTIMTI SKDRVKPSPT PDSWKLKEIF ATGIVLGGYQ<br/> 721 AIMSIVFFWA AHKTDFFSK FGVSIRDNN DELMGAVYLQ VSIISQALIF VTRSRWSFV<br/> 781 ERPGALLMIA FVIAQLVATL IAVYADWTF A KVGIGWGA GVIWIYSIVT YFPQDILKFA<br/> 841 IRYLLSGKAW ASLFDNRATF TTKDYGIGE REAQQWAQQR TLHGLQPKED VNIFFPEKGSY<br/> 901 RELSEIAEQA KRRAEIRLR ELHTLKGHVE SVAKLKGLDI DTAGHHYV</p> <p>&gt;gi 12644156 sp P20649.3 PMA1_ARATH RecName: Full=ATPase 1, plasma membrane-type; AltName: Full=Proton pump 1</p> <p>MSGLEDIKNETVDLEKIPIEBEVFQQLKCTREGLTTQEGEDRIVIFGPNKLEEKESKILKFLGFMWNPLS<br/> WVMEAAALMAIALANGDNRPDPWQDFVGIICLLVINSTISFIEENNAGNAAAALMAGLAPKTKVLRDQGW<br/> SEQEAAILVPGDIVSIKLGDIIPADARLLEGDPLKVDQSALTGESLPVTKHPGQEVFSGSTCKQGEIEAV<br/> VIATGVHTFFGKAAHLVDSTNQVGHFQKVLTSIGNFCICSIAIGIAIEIVVMPYIQRKRYRDGIDNLLVL<br/> LIGGIPIAMPTVLSVTMAIGSHRLSQQGAITKRMTAIEEMAGMDVLCSDKTGTTLNLKLSVDKNLVEVFC</p>                                                                                                                                                                                                                                                                                                                                                                                                                                                                                                                                                                                                                                                                                                                                                                                                                                                                                                                                                                                                                                                                                                                                                                                                                                                                                                                                                                                                                                                                                                                                                                                                                                                                                                                                                                                                                                                                                                                          |                                                              |

KGVEKDQVLLFAAMASRVENQDAIDAAMVGLADPKPEARAGIREVHFLPFNPVDRKRTALTYIDSDGNWHR  
 VSKGAPEQIILDLANARPDRLRKKVLSICIDKYAERGLRSLAVARQVVPEKTKESPGGPWEFVGLLPLDFPPR  
 HDSAETIRRALNLGNVNVKMITGDQLAIGKETGRRRLGMGTNMYPSAALLGTDKDSNIASIPVEELIEKADG  
 FAGVFPEHKYEVKVKLQERKHIVGMTGDGVNDAPALKKADIGIAVADATDAARGASDIVLTFEPLSVIIS  
 AVLTSTRAIFQRMKNYTIYAVSITIRIVFGFMILALWFEFDFSAFMVLI IALINDGTIMTISKDRVKPSPT  
 PDSWKLKEIFATGIVLGGYQAIMSVIFFWAAHKTDFFSKDFGVRSIRDNDDELGMGAVYLQVSIISQALIF  
 VTRRSRWSFVERPGALLMIAFVIAQLVATLAVYADWTFARVKGIGWGWAGVIWISIVTYFPQDILKFA  
 IRYILSGKAWASLFDNRATFTTKKDYGIGEREQAQQAQRTHLGLQPKEDVNIIFPEKGSYRELSEIAEQ  
 KRRAEIAARLRELHTLKGHVESVAKLKLGLDIDTAGHHYTV

**Notes**

The mode III 14-3-3-binding site (Y(pT)V-COOH) is found in members of the large family of V-type plasma membrane proton pumps (see sequence alignment in Duby and Boutry 2008). The sequence of PMA1 is given here. Structural studies indicate that a hexameric complex resulting from the assembly of three H<sup>+</sup>-ATPase dimers linked by three 14-3-3 dimers. The complex is stabilised by fusicoccin, which binds to the 14-3-3 and H<sup>+</sup>-ATPase within the central groove of the 14-3-3 dimer.

**References to 14-3-3 binding to plant plasma membrane H<sup>+</sup>-ATPase**

Alsterfjord M, Sehne PC, Arkell A, Larsson H, Sennelid F, Rosenquist M, Ferl RJ, Sommarin M, Larsson C. Plasma membrane H<sup>(+)</sup>-ATPase and 14-3-3 isoforms of Arabidopsis leaves: evidence for isoform specificity in the 14-3-3/H<sup>(+)</sup>-ATPase interaction. *Plant Cell Physiol.* 2004 Sep;45(9):1202-10.

Anzi C, Pelucchi P, Vazzola V, Murgia I, Gomarasca S, Piccoli MB, Morandini P. The proton pump interactor (Ppi) gene family of Arabidopsis thaliana: expression pattern of Ppi1 and characterisation of knockout mutants for Ppi1 and 2. *Plant Biol (Stuttg).* 2008 Mar;10(2):237-49.

Axelsen KB, Venema K, Jahn T, Baunsgaard L, Palmgren MG. Molecular dissection of the C-terminal regulatory domain of the plant plasma membrane H<sup>+</sup>-ATPase AHA2: mapping of residues that when altered give rise to an activated enzyme. *Biochemistry.* 1999 Jun 1;38(22):7227-34.

Babakov AV, Chelysheva VV, Klychnikov OI, Zorinyanz SE, Trofimova MS, De Boer AH. Involvement of 14-3-3 proteins in the osmotic regulation of H<sup>+</sup>-ATPase in plant plasma membranes. *Planta.* 2000 Aug;211(3):446-8.

Baunsgaard L, Fuglsang AT, Jahn T, Korthout HA, de Boer AH, Palmgren MG. The 14-3-3 proteins associate with the plant plasma membrane H<sup>(+)</sup>-ATPase to generate a fusicoccin binding complex and a fusicoccin responsive system. *Plant J.* 1998 Mar;13(5):661-71.

Block P, Weskamp N, Wolf A, Klebe G. Strategies to search and design stabilizers of protein-protein interactions: a feasibility study. *Proteins.* 2007 Jul 1;68(1):170-86.

Borch J, Bych K, Roepstorff P, Palmgren MG, Fuglsang AT. Phosphorylation-independent interaction between 14-3-3 protein and the plant plasma membrane H<sup>+</sup>-ATPase. *Biochem Soc Trans.* 2002 Aug;30(4):411-5.

Camoni L, Iori V, Marra M, Aducci P. Phosphorylation-dependent interaction between plant plasma membrane H<sup>(+)</sup>-ATPase and 14-3-3 proteins. *J Biol Chem.* 2000 Apr 7;275(14):9919-23.

Camoni L, Marra M, Garufi A, Visconti S, Aducci P. The maize root plasma membrane H<sup>(+)</sup>-ATPase is regulated by a sugar-induced transduction pathway. *Plant Cell Physiol.* 2006 Jun;47(6):743-7.

Camoni L, Visconti S, Marra M, Aducci P. Adenosine 5'-monophosphate inhibits the association of 14-3-3 proteins with the plant plasma membrane H<sup>(+)</sup>-ATPase. *J Biol Chem.* 2001 Aug 24;276(34):31709-12.

Chelysheva VV, Smolenskaya IN, Trofimova MC, Babakov AV, Muromtsev GS. Role of the 14-3-3 proteins in the regulation of H<sup>+</sup>-ATPase activity in the plasma membrane of suspension-cultured sugar beet cells under cold stress. *FEBS Lett.* 1999 Jul 30;456(1):22-6.

Dambly S, Boutry M. The two major plant plasma membrane H<sup>+</sup>-ATPases display different regulatory properties. *J Biol Chem.* 2001 Mar 9;276(10):7017-22.

Duby G, Boutry M. The plant plasma membrane proton pump ATPase: a highly regulated P-type ATPase with multiple physiological roles. *Pflügers Arch.* 2009 Jan;457(3):645-55.

Duby G, Poreba W, Piotrowiak D, Bobik K, Derua R, Waelkens E, Boutry M. Activation of plant plasma membrane H<sup>+</sup>-ATPase by 14-3-3 proteins is negatively controlled by two phosphorylation sites within the H<sup>+</sup>-ATPase C-terminal region. *J Biol Chem.* 2009 Feb 13;284(7):4213-21.

Emi T, Kinoshita T, Shimazaki K. Specific binding of vfl14-3-3a isoform to the plasma membrane H<sup>+</sup>-ATPase in response to blue light and fusicoccin in guard cells of broad bean. *Plant Physiol.* 2001 Feb;125(2):1115-25.

Finni C, Andersen CH, Borch J, Gjetting S, Christensen AB, de Boer AH, Thordal-Christensen H, Collinge DB. Do 14-3-3 proteins and plasma membrane H<sup>+</sup>-ATPases interact in the barley epidermis in response to the barley powdery mildew fungus? *Plant Mol Biol.* 2002 May;49(2):137-47.

Fuglsang AT, Borch J, Bych K, Jahn TP, Roepstorff P, Palmgren MG. The binding site for regulatory 14-3-3 protein in plant plasma membrane H<sup>+</sup>-ATPase: involvement of a region promoting phosphorylation-independent interaction in addition to the phosphorylation-dependent C-terminal end. *J Biol Chem.* 2003 Oct 24;278(43):42266-72.

Fuglsang AT, Guo Y, Cuin TA, Qiu Q, Song C, Kristiansen KA, Bych K, Schulz A, Shabala S, Schumaker KS, Palmgren MG, Zhu JK. Arabidopsis protein kinase PKS5 inhibits the plasma membrane H<sup>+</sup>-ATPase by preventing interaction with 14-3-3 protein. *Plant Cell.* 2007 May;19(5):1617-34.

Fuglsang AT, Visconti S, Drumm K, Jahn T, Stensballe A, Mattei B, Jensen ON, Aducci P, Palmgren MG. Binding of 14-3-3 protein to the plasma membrane H<sup>(+)</sup>-ATPase AHA2 involves the three C-terminal residues Tyr(946)-Thr(947) and requires phosphorylation of Thr(947). *J Biol Chem.* 1999 Dec 17;274(51):36774-80.

Fullone MR, Visconti S, Marra M, Fogliano V, Aducci P. Fusicoccin effect on the in vitro interaction between plant 14-3-3 proteins and plasma membrane H<sup>+</sup>-ATPase. *J Biol Chem.* 1998 Mar 27;273(13):7698-702.

Garufi A, Visconti S, Camoni L, Aducci P. Polyamines as physiological regulators of 14-3-3 interaction with the plant plasma membrane H<sup>+</sup>-ATPase. *Plant Cell Physiol.* 2007 Mar;48(3):434-40.

Gévaudant F, Duby G, von Stedingk E, Zhao R, Morsomme P, Boutry M. Expression of a constitutively activated plasma membrane H<sup>+</sup>-ATPase alters plant development and increases salt tolerance. *Plant Physiol.* 2007 Aug;144(4):1763-76.

Giacometti S, Camoni L, Albumi C, Visconti S, De Michelis MI, Aducci P. Tyrosine phosphorylation inhibits the interaction of 14-3-3 proteins with the plant plasma membrane H<sup>+</sup>-ATPase. *Plant Biol (Stuttg).* 2004 Jul;6(4):422-31.

Inoue S, Kinoshita T, Shimazaki K. Possible involvement of phototropins in leaf movement of kidney bean in response to blue light. *Plant Physiol.* 2005 Aug;138(4):1994-2004.

Jahn T, Dietrich J, Andersen B, Leidvik B, Otter C, Briving C, Kühlbrandt W, Palmgren MG. Large scale expression,

|                                                                                                                                                                                                                                                                                                                                                                                                                                                                                                                                                                                                                                                                                                                                                                                                                                                                                                                                                                                                                                                                                                                                                                                                                                                                                                                                                                                                                                                                                                                                                                                                                                                                                                                                                                                                                                                                                                                                                                                                                                                                                                                                                                                                                                                                                                                                                                                                                                                                                                                                                                                                                                                                                                                                                                                                                                                                                                                                                                                                                                                                                                                                                                                                                                                                                                                                                                                                                                                                                                                                                                                                                                                                                                                                                                                                                                                                                                                                                                                                                                                                                                                                                                                                                                                                                                                                                                                                                                                                                                                                                                                                                                                                                                                                                                                                                                                                                                                                                                                                                                                                                                                                                                                                                                                                                                                                                                                                                                                                                                                                                                                                                                                                                                                                                                                                                                                                                                                                                                                                                                                                                                                                                                                                                                                                                                                                                                                                                                                                                                                                                                                                                                                                                                                                                                                                                                                                                                                                                                                                                                                                                                                 |                                                         |
|-----------------------------------------------------------------------------------------------------------------------------------------------------------------------------------------------------------------------------------------------------------------------------------------------------------------------------------------------------------------------------------------------------------------------------------------------------------------------------------------------------------------------------------------------------------------------------------------------------------------------------------------------------------------------------------------------------------------------------------------------------------------------------------------------------------------------------------------------------------------------------------------------------------------------------------------------------------------------------------------------------------------------------------------------------------------------------------------------------------------------------------------------------------------------------------------------------------------------------------------------------------------------------------------------------------------------------------------------------------------------------------------------------------------------------------------------------------------------------------------------------------------------------------------------------------------------------------------------------------------------------------------------------------------------------------------------------------------------------------------------------------------------------------------------------------------------------------------------------------------------------------------------------------------------------------------------------------------------------------------------------------------------------------------------------------------------------------------------------------------------------------------------------------------------------------------------------------------------------------------------------------------------------------------------------------------------------------------------------------------------------------------------------------------------------------------------------------------------------------------------------------------------------------------------------------------------------------------------------------------------------------------------------------------------------------------------------------------------------------------------------------------------------------------------------------------------------------------------------------------------------------------------------------------------------------------------------------------------------------------------------------------------------------------------------------------------------------------------------------------------------------------------------------------------------------------------------------------------------------------------------------------------------------------------------------------------------------------------------------------------------------------------------------------------------------------------------------------------------------------------------------------------------------------------------------------------------------------------------------------------------------------------------------------------------------------------------------------------------------------------------------------------------------------------------------------------------------------------------------------------------------------------------------------------------------------------------------------------------------------------------------------------------------------------------------------------------------------------------------------------------------------------------------------------------------------------------------------------------------------------------------------------------------------------------------------------------------------------------------------------------------------------------------------------------------------------------------------------------------------------------------------------------------------------------------------------------------------------------------------------------------------------------------------------------------------------------------------------------------------------------------------------------------------------------------------------------------------------------------------------------------------------------------------------------------------------------------------------------------------------------------------------------------------------------------------------------------------------------------------------------------------------------------------------------------------------------------------------------------------------------------------------------------------------------------------------------------------------------------------------------------------------------------------------------------------------------------------------------------------------------------------------------------------------------------------------------------------------------------------------------------------------------------------------------------------------------------------------------------------------------------------------------------------------------------------------------------------------------------------------------------------------------------------------------------------------------------------------------------------------------------------------------------------------------------------------------------------------------------------------------------------------------------------------------------------------------------------------------------------------------------------------------------------------------------------------------------------------------------------------------------------------------------------------------------------------------------------------------------------------------------------------------------------------------------------------------------------------------------------------------------------------------------------------------------------------------------------------------------------------------------------------------------------------------------------------------------------------------------------------------------------------------------------------------------------------------------------------------------------------------------------------------------------------------------------------------------------------------------------|---------------------------------------------------------|
| <p>purification and 2D crystallization of recombinant plant plasma membrane H<sup>+</sup>-ATPase. <i>J Mol Biol.</i> 2001 Jun 1;309(2):465-76.</p> <p>Jahn T, Fuglsang AT, Olsson A, Brüntrup IM, Collinge DB, Volkmann D, Sommarin M, Palmgren MG, Larsson C. The 14-3-3 protein interacts directly with the C-terminal region of the plant plasma membrane H<sup>+</sup>-ATPase. <i>Plant Cell.</i> 1997 Oct;9(10):1805-14.</p> <p>Jahn TP, Schulz A, Taipalensuu J, Palmgren MG. Post-translational modification of plant plasma membrane H<sup>+</sup>-ATPase as a requirement for functional complementation of a yeast transport mutant. <i>J Biol Chem.</i> 2002 Feb 22;277(8):6353-8.</p> <p>Jaspert N, Oecking C. Regulatory 14-3-3 proteins bind the atypical motif within the C terminus of the plant plasma membrane H<sup>+</sup>-ATPase via their typical amphipathic groove. <i>Planta.</i> 2002 Nov;216(1):136-9.</p> <p>Jelich-Ottmann C, Weiler EW, Oecking C. Binding of regulatory 14-3-3 proteins to the C terminus of the plant plasma membrane H<sup>+</sup>-ATPase involves part of its autoinhibitory region. <i>J Biol Chem.</i> 2001 Oct 26;276(43):39852-7.</p> <p>Kanczewska J, Marco S, Vandermeeren C, Maudoux O, Rigaud JL, Boutry M. Activation of the plant plasma membrane H<sup>+</sup>-ATPase by phosphorylation and binding of 14-3-3 proteins converts a dimer into a hexamer. <i>Proc Natl Acad Sci U S A.</i> 2005 Aug 16;102(33):11675-80.</p> <p>Kinoshita T, Shimazaki K. Analysis of the phosphorylation level in guard-cell plasma membrane H<sup>+</sup>-ATPase in response to fusicoccin. <i>Plant Cell Physiol.</i> 2001 Apr;42(4):424-32.</p> <p>Kinoshita T, Shimazaki K. Biochemical evidence for the requirement of 14-3-3 protein binding in activation of the guard-cell plasma membrane H<sup>+</sup>-ATPase by blue light. <i>Plant Cell Physiol.</i> 2002 Nov;43(11):1359-65.</p> <p>Kinoshita T, Shimazaki K. Blue light activates the plasma membrane H<sup>+</sup>-ATPase by phosphorylation of the C-terminus in stomatal guard cells. <i>EMBO J.</i> 1999 Oct 15;18(20):5548-58.</p> <p>Malerba M, Bianchetti R. 14-3-3 protein-activated and autoinhibited forms of plasma membrane H<sup>+</sup>-ATPase. <i>Biochem Biophys Res Commun.</i> 2001 Sep 7;286(5):984-90.</p> <p>Maudoux O, Batoko H, Oecking C, Gevaert K, Vandekerckhove J, Boutry M, Morsomme P. A plant plasma membrane H<sup>+</sup>-ATPase expressed in yeast is activated by phosphorylation at its penultimate residue and binding of 14-3-3 regulatory proteins in the absence of fusicoccin. <i>J Biol Chem.</i> 2000 Jun 9;275(23):17762-70.</p> <p>Morandini P, Valera M, Albumi C, Bonza MC, Giacometti S, Ravera G, Murgia I, Soave C, De Michelis MI. A novel interaction partner for the C-terminus of Arabidopsis thaliana plasma membrane H<sup>+</sup>-ATPase (AHA1 isoform): site and mechanism of action on H<sup>+</sup>-ATPase activity differ from those of 14-3-3 proteins. <i>Plant J.</i> 2002 Aug;31(4):487-97.</p> <p>Olivari C, Albumi C, Pugliarello MC, De Michelis MI. Phenylarsine oxide inhibits the fusicoccin-induced activation of plasma membrane H<sup>+</sup>-ATPase. <i>Plant Physiol.</i> 2000 Feb;122(2):463-70.</p> <p>Olivari C, Meanti C, De Michelis MI, Rasi-Caldogno F. Fusicoccin binding to its plasma membrane receptor and the activation of the plasma membrane H<sup>+</sup>-ATPase. IV. Fusicoccin induces the association between the plasma membrane H<sup>+</sup>-ATPase and the fusicoccin receptor. <i>Plant Physiol.</i> 1998 Feb;116(2):529-37.</p> <p>Olsson A, Svennelid F, Ek B, Sommarin M, Larsson C. A phosphothreonine residue at the C-terminal end of the plasma membrane H<sup>+</sup>-ATPase is protected by fusicoccin-induced 14-3-3 binding. <i>Plant Physiol.</i> 1998 Oct;118(2):551-5.</p> <p>Ottmann C, Marco S, Jaspert N, Marcon C, Schauer N, Weyand M, Vandermeeren C, Duby G, Boutry M, Wittinghofer A, Rigaud JL, Oecking C. Structure of a 14-3-3 coordinated hexamer of the plant plasma membrane H<sup>+</sup>-ATPase by combining X-ray crystallography and electron cryomicroscopy. <i>Mol Cell.</i> 2007 Feb 9;25(3):427-40.</p> <p>Palmgren MG. PLANT PLASMA MEMBRANE H<sup>+</sup>-ATPases: Powerhouses for Nutrient Uptake. <i>Annu Rev Plant Physiol Plant Mol Biol.</i> 2001 Jun;52:817-845.</p> <p>Pertl H, Himly M, Gehwolf R, Kriechbaumer R, Strasser D, Michalke W, Richter K, Ferreira F, Obermeyer G. Molecular and physiological characterisation of a 14-3-3 protein from lily pollen grains regulating the activity of the plasma membrane H<sup>+</sup> ATPase during pollen grain germination and tube growth. <i>Planta.</i> 2001 May;213(1):132-41.</p> <p>Piotrowski M, Morsomme P, Boutry M, Oecking C. Complementation of the <i>Saccharomyces cerevisiae</i> plasma membrane H<sup>+</sup>-ATPase by a plant H<sup>+</sup>-ATPase generates a highly abundant fusicoccin binding site. <i>J Biol Chem.</i> 1998 Nov 6;273(45):30018-23.</p> <p>Svennelid F, Olsson A, Piotrowski M, Rosenquist M, Ottman C, Larsson C, Oecking C, Sommarin M. Phosphorylation of Thr-948 at the C terminus of the plasma membrane H<sup>+</sup>-ATPase creates a binding site for the regulatory 14-3-3 protein. <i>Plant Cell.</i> 1999 Dec;11(12):2379-91.</p> <p>Ueno K, Kinoshita T, Inoue S, Emi T, Shimazaki K. Biochemical characterization of plasma membrane H<sup>+</sup>-ATPase activation in guard cell protoplasts of <i>Arabidopsis thaliana</i> in response to blue light. <i>Plant Cell Physiol.</i> 2005 Jun;46(6):955-63.</p> <p>Viotti C, Luoni L, Morandini P, De Michelis MI. Characterization of the interaction between the plasma membrane H<sup>+</sup>-ATPase of <i>Arabidopsis thaliana</i> and a novel interactor (PPI1). <i>FEBS J.</i> 2005 Nov;272(22):5864-71.</p> <p>Visconti S, Camoni L, Fullone MR, Lalle M, Marra M, Aducci P. Mutational analysis of the interaction between 14-3-3 proteins and plant plasma membrane H<sup>+</sup>-ATPase. <i>J Biol Chem.</i> 2003 Mar 7;278(10):8172-8.</p> <p>Visconti S, Camoni L, Marra M, Aducci P. Role of the 14-3-3 C-terminal region in the interaction with the plasma membrane H<sup>+</sup>-ATPase. <i>Plant Cell Physiol.</i> 2008 Dec;49(12):1887-97.</p> <p>Woloszynska M, Kanczewska J, Drabkin A, Maudoux O, Dambly S, Boutry M. Function and regulation of the two major plant plasma membrane H<sup>+</sup>-ATPases. <i>Ann N Y Acad Sci.</i> 2003 Apr;986:198-203.</p> <p>Würtele M, Jelich-Ottmann C, Wittinghofer A, Oecking C. Structural view of a fungal toxin acting on a 14-3-3 regulatory complex. <i>EMBO J.</i> 2003 Mar 3;22(5):987-94.</p> <p>Zhang X, Wang H, Takemiya A, Song CP, Kinoshita T, Shimazaki K. Inhibition of blue light-dependent H<sup>+</sup> pumping by abscisic acid through hydrogen peroxide-induced dephosphorylation of the plasma membrane H<sup>+</sup>-ATPase in guard cell protoplasts. <i>Plant Physiol.</i> 2004 Dec;136(4):4150-8.</p> |                                                         |
| <p><b>Arabidopsis RPW8.2</b> (Swissprot = Q9C5Z6)</p> <p>1 MIAEVAAGGA LGLALSVLHE AVKRAKDRSV TTRFILHRLE ATIDSITPLV VQIDKFSEEM<br/> 61 EDSTSRKVNK RLKLLLENV SLVEENAELR RRNVKRFY MRDIKEFEAK LRWVVDVDVQ<br/> 121 VNQLADIKEL KAKMSEISTK LDKIMPQPKF EIHIGWCSGK TNRAIRFTFC SDDS<br/> &gt;gi 75169011 sp Q9C5Z6 Q9C5Z6_ARATH_RPW8.2<br/> MIAEVAAGGALGLALSVLHEAVKRAKDRSVTTRFILHRLEATIDSITPLVVQIDKFSEEMEDSTSRKVNK</p>                                                                                                                                                                                                                                                                                                                                                                                                                                                                                                                                                                                                                                                                                                                                                                                                                                                                                                                                                                                                                                                                                                                                                                                                                                                                                                                                                                                                                                                                                                                                                                                                                                                                                                                                                                                                                                                                                                                                                                                                                                                                                                                                                                                                                                                                                                                                                                                                                                                                                                                                                                                                                                                                                                                                                                                                                                                                                                                                                                                                                                                                                                                                                                                                                                                                                                                                                                                                                                                                                                                                                                                                                                                                                                                                                                                                                                                                                                                                                                                                                                                                                                                                                                                                                                                                                                                                                                                                                                                                                                                                                                                                                                                                                                                                                                                                                                                                                                                                                                                                                                                                                                                                                                                                                                                                                                                                                                                                                                                                                                                                                                                                                                                                                                                                                                                                                                                                                                                                                                                                                                                                                                                                                                                                                                                                                                                                                                                                                                                                                                                                                                                                                                                                                                     | <p>Sites of 14-3-3 binding not defined. NO WEBLOGO.</p> |

|                                                                                                                                                                                                                                                                                                                                                                                                                                                                                                                                                                                                                                                                                                                                                                                                                                                                                                                                                                                                                                                                                                                                                                                                                                                                                                                                                                                                                                                                                                                                                                                                                                                                                                                                                                                                                                                                                                                                                                                                                                                                                                                                                                                                                                                                                                                                                                                                                                                                                                                                                                                                                                                                                                                                                                                                             |                                                           |
|-------------------------------------------------------------------------------------------------------------------------------------------------------------------------------------------------------------------------------------------------------------------------------------------------------------------------------------------------------------------------------------------------------------------------------------------------------------------------------------------------------------------------------------------------------------------------------------------------------------------------------------------------------------------------------------------------------------------------------------------------------------------------------------------------------------------------------------------------------------------------------------------------------------------------------------------------------------------------------------------------------------------------------------------------------------------------------------------------------------------------------------------------------------------------------------------------------------------------------------------------------------------------------------------------------------------------------------------------------------------------------------------------------------------------------------------------------------------------------------------------------------------------------------------------------------------------------------------------------------------------------------------------------------------------------------------------------------------------------------------------------------------------------------------------------------------------------------------------------------------------------------------------------------------------------------------------------------------------------------------------------------------------------------------------------------------------------------------------------------------------------------------------------------------------------------------------------------------------------------------------------------------------------------------------------------------------------------------------------------------------------------------------------------------------------------------------------------------------------------------------------------------------------------------------------------------------------------------------------------------------------------------------------------------------------------------------------------------------------------------------------------------------------------------------------------|-----------------------------------------------------------|
| <p>RLKLLLENVAVSLVEENAEARRRNRKFRYMRDIKEFEAKLRVWVVDVQVNLADIKELKAKMSEISTK<br/>LDKIMPQPKFEIHIGWCSGKTNRARFTFCSDDS</p> <p><b>Notes</b><br/>The RPW8 locus from Arabidopsis thaliana Ms-0 includes two functional paralogous genes (RPW8.1 and RPW8.2) and confers broad-spectrum resistance via the salicylic acid-dependent signaling pathway to the biotrophic fungal pathogens Golovinomyces spp. that cause powdery mildew diseases on multiple plant species. The C-terminal domain of RPW8.2 is required for the interaction of this protein with 14-3-3 (Yang et al 2009). <b>References to 14-3-3 binding to Arabidopsis RPW8.2</b><br/>Yang X, Wang W, Coleman M, Orgil U, Feng J, Ma X, Ferl R, Turner JG, Xiao S. Arabidopsis 14-3-3 lambda is a positive regulator of RPW8-mediated disease resistance. Plant J. 2009 Jul 16. [Epub ahead of print]</p>                                                                                                                                                                                                                                                                                                                                                                                                                                                                                                                                                                                                                                                                                                                                                                                                                                                                                                                                                                                                                                                                                                                                                                                                                                                                                                                                                                                                                                                                                                                                                                                                                                                                                                                                                                                                                                                                                                                                               |                                                           |
| <p><b>Arabidopsis SERK1 (uniprot Q94AG2)</b></p> <p>1 MESSYVVFIL LSLILLPNHS LWLASANLEG DALHTLRVTL VDPNNVLQSW DPTLVNPCTW<br/>61 FHVTCNNENS VIRVDLGNAE LSGHLVPELG VLKLNQYLEL YSNNTIGPIP SNLGNLTNLV<br/>121 SLDLYLNSFS GPIPELGLK SKLRFRLNNS LTGSI PMS LTNITTLQVLDLSNNRSLGS<br/>181 VPDNGSFSLF TPISFANNLD LCGPVTSHPC PGSFPFSPFP PFIQPPPVST PSGYGITGAI<br/>241 AGGVAAGAAL LFAAPAIAFA WRRRRKPLDI FFDVPAEEDP EVHLGQLKRF SLRELQVSD<br/>301 GFSNKNILGR GGFGKVKYGR LADGTLVAVK RLKEERTPGG ELQFQTEVEM ISMAVHRNLL<br/>361 RLRGFCMTPT ERLLVYPYMA NGSVASCLRE RPSQPPLDW PTRKRIALGS ARGLSYLHHD<br/>421 CDPKIHRDV KAANILLDEE FEAVVGDVGL AKLMDYKDTHT VTAVRGTIG HIAPEYLSSTG<br/>481 KSSEKTDVFG YGIMLLELIT GQRAFDLARL ANDDDDVMLLD VVKGLLKEKK LEMLVDPDLQ<br/>541 TNYEERELEQ VIQVALLCTQ GSPMERPKMS EVVRMLEGDG LAEKWDEWQK VEILREEIDL<br/>601 SPNPNSDWIL DSTYNLHVAE LSGPR</p> <p>&gt;sp Q94AG2 SERK1_ARATH Somatic embryogenesis receptor kinase 1 OS=Arabidopsis thaliana GN=SERK1 PE=1 SV=2<br/>MESSYVVFILLSLILLPNHSLWLASANLEGDALHTLRVTLVDPNNVLQSWDPTLVNPCTW<br/>FHVTCNNENS VIRVDLGNAE LSGHLVPELGV LKLNQYLELYSNNTIGPIP SNLGNLTNLV<br/>SLDLYLNSFS GPIPELGLKSKLRFRLNNS LTGSI PMS LTNITTLQVLDLSNNRSLGS<br/>VPDNGSFSLF TPISFANNLD LCGPVTSHPC PGSFPFSPFP PFIQPPPVST PSGYGITGAI<br/>AGGVAAGAAL LFAAPAIAFA WRRRRKPLDI FFDVPAEEDP EVHLGQLKRF SLRELQVSD<br/>GFSNKNILGR GGFGKVKYGR LADGTLVAVK RLKEERTPGG ELQFQTEVEM ISMAVHRNLL<br/>RLRGFCMTPT ERLLVYPYMA NGSVASCLRE RPSQPPLDW PTRKRIALGS ARGLSYLHHD<br/>CDPKIHRDV KAANILLDEE FEAVVGDVGL AKLMDYKDTHT VTAVRGTIG HIAPEYLSSTG<br/>KSSEKTDVFG YGIMLLELIT GQRAFDLARL ANDDDDVMLLD VVKGLLKEKK LEMLVDPDLQ<br/>TNYEERELEQ VIQVALLCTQ GSPMERPKMS EVVRMLEGDG LAEKWDEWQK VEILREEIDL<br/>SPNPNSDWILDSTYNLHVAELSGPR</p> <p><b>Notes</b><br/>14-3-3 binding site has not been confirmed, but there is a putative binding site at S394.<br/>Just used 266 – 625 of AtSERK1, (kinase domain) as bait in Y2H of silique tissue.<br/>Found GF14λ (14-3-3) and more experiments in yeast showed that GF14 interacted with the kinase domain but not the LRR<br/>Expressed GST-AtSERK1 kinase domain in E. coli and phosphorylated it by adding ATP (autophosphorylation).<br/>Although GF14 showed basal binding to non-phosphorylated SERK, in pull-downs of bacterially expressed proteins this was enhanced when phosphorylated SERK was used but seemed to require the first 38 aa of GF14.<br/>GF14 can be phosphorylated in vitro with AtSERK<br/>GF14 binding to SERK has no effect on the kinase activity of SERK</p> <p><b>References to 14-3-3 binding to SERK1</b><br/>Rienties IM, Vink J, Borst JW, Russinova E, de Vries SC. The Arabidopsis SERK1 protein interacts with the AAA-ATPase AtCDC48, the 14-3-3 protein GF14lambda and the PP2C phosphatase KAPP. Planta. 2005 Jun;221(3):394-405.</p> | <p>Sites of 14-3-3 binding not confirmed. NO WEBLOGO.</p> |
| <p><b>Arabidopsis SPS ATSPS1F (sucrose phosphate synthase 1F) (NM_122035.2)</b></p> <p>1 MAGNDWVNSY LEAILDVGGQ LDDARSSPSL LLRERGRFTP SRYFVEEVIT GYDETDLHRS<br/>61 VVKAVATRSP QERNTRLENM CWRIWNLARQ KKQHEEKEAQ RLAKRRLERE KGRREATADM<br/>121 SEEFSEGEKG DIIISDISTHG ESTKPRLPRI NSAESMELWA SQQKGNKLYL VLISLHGLIR<br/>181 GENMELGRDS DTGGQVKYVV ELARALGSMP GVYRVDLLTR QVSPDVEDYS YGEPTEMLTP<br/>241 RDEDFSDSEM GESSGAYIVR IPFGPKDKYI PKELLWPHIP EFVDGAMSHI MQMSNVLGEQ<br/>301 VGVGKPIWPS AIHGHYADAG DATAALLSGAL NVPMMLTGHG LGRDKLEQLL RQGRLSKEEI<br/>361 NSTYKIMRRI EGELS LDVS EMVITSTRQE IDEQWRLYDG FDPILERKLR ARIKRNVSICY<br/>421 GRFMPRMVKI PPGMEFNHIV PHGGDMEDTD GNEEHPTSPD PPIWAEIMRF FSNSRKPML<br/>481 ALARPDPKKN ITTLVKAFGE CRPLRELANL ALIMGNRDGI DEMSSTSSSV LLSVLKLDIK<br/>541 YDLYGQVAYP KHHKQSDVPD IYRLAAKSKG VFINPAIIEP FGLTLIEAAA HGLPMVATKN<br/>601 GGPVDIHRVL DNGLLVDPHD QQSISEALK LVADKHLWAK CRQNGLNKIH QFSWPEHCKT<br/>661 YLSRITSFKP RHPQWQSDDG GDNSEPEPSPS DSLRDIQDIS LNLKFSFDGS GNDNYMNQEG<br/>721 SSMRKSKEI AAVQNWSKGK DSRKMGSLER SEVNSGKFFA VRRRKFVVI ALDFDGEDT<br/>781 LEATKRILDA VEKERAEGSV GFILSTSLTI SEVQSFLVSG GLNPNDFDAF ICNSGSDLHY<br/>841 TSLNNEGDPF VVDYYHSHI EYRWGEGELR KTLIRWASSL NEKKADNDEQ IYTLAEHLST<br/>901 DYCFTFTVKK PAAVPPVREL RKLRLIQALR CHVVYSQNGT RNVIPVLAS RIQALRYLFV<br/>961 RWGIDMAKMA VVVGESGDTD YEGLLGGLHK SVVLKGVSCS ACLHANRSYP LTDVISFESN<br/>1021 NVVHASPDS VRDALKKLEL LKD</p> <p><b>Notes</b><br/>In dicotyledonous plants there are three SPS gene families: A, B, and C, and five families (A, B, C, and two D subfamilies) of SPS genes in wheat (Triticum aestivum) and other monocotyledonous plants from the family Poaceae (grasses) (Castleden et al 2004). The 14-3-3-binding site Ser229 is found within the A type SPS sequences (LTRQVSSP in Nicotiana sequence). The sequence of the Arabidopsis version of SPSA (SPS1F) is given.</p> <p><b>References to 14-3-3 binding to SPS</b><br/>Börnke F. The variable C-terminus of 14-3-3 proteins mediates isoform-specific interaction with sucrose-phosphate synthase in the yeast two-hybrid system. J Plant Physiol. 2005 Feb;162(2):161-8.</p>                                                                                                                                                                                                                                                                                                                                                                                                                                                                                                                                                                                                                                                 |                                                           |

|                                                                                                                                                                                                                                                                                                                                                                                                                                                                                                                                                                                                                                                                                                                                                                                                                                                                                                                                                                                                                                                                                                                                                                                                                                                                                                                                                                                                                                                                                                                                                                                                                                                                                                                                                                                                                                                                                                                                                                                                                                                                                                                                                                                                                                                                                                                                                                                                                                                                                                                                                                                                                                                                                                                                                                                                                                                                                                                                                                                                                                   |                                                              |
|-----------------------------------------------------------------------------------------------------------------------------------------------------------------------------------------------------------------------------------------------------------------------------------------------------------------------------------------------------------------------------------------------------------------------------------------------------------------------------------------------------------------------------------------------------------------------------------------------------------------------------------------------------------------------------------------------------------------------------------------------------------------------------------------------------------------------------------------------------------------------------------------------------------------------------------------------------------------------------------------------------------------------------------------------------------------------------------------------------------------------------------------------------------------------------------------------------------------------------------------------------------------------------------------------------------------------------------------------------------------------------------------------------------------------------------------------------------------------------------------------------------------------------------------------------------------------------------------------------------------------------------------------------------------------------------------------------------------------------------------------------------------------------------------------------------------------------------------------------------------------------------------------------------------------------------------------------------------------------------------------------------------------------------------------------------------------------------------------------------------------------------------------------------------------------------------------------------------------------------------------------------------------------------------------------------------------------------------------------------------------------------------------------------------------------------------------------------------------------------------------------------------------------------------------------------------------------------------------------------------------------------------------------------------------------------------------------------------------------------------------------------------------------------------------------------------------------------------------------------------------------------------------------------------------------------------------------------------------------------------------------------------------------------|--------------------------------------------------------------|
| <p>Castleden CK, Aoki N, Gillespie VJ, MacRae EA, Quick WP, Buchner P, Foyer CH, Furbank RT, Lunn JE. Evolution and function of the sucrose-phosphate synthase gene families in wheat and other grasses. <i>Plant Physiol.</i> 2004 Jul;135(3):1753-64.</p> <p>Toroser D, Athwal GS, Huber SC. Site-specific regulatory interaction between spinach leaf sucrose-phosphate synthase and 14-3-3 proteins. <i>FEBS Lett.</i> 1998 Sep 11;435(1):110-4.</p> <p>Moorhead G, Douglas P, Cotelle V, Harthill J, Morrice N, Meek S, Deiting U, Stitt M, Scarabel M, Aitken A, MacKintosh C. Phosphorylation-dependent interactions between enzymes of plant metabolism and 14-3-3 proteins. <i>Plant J.</i> 1999 Apr;18(1):1-12.</p> <p>Langenkämper G, Fung RW, Newcomb RD, Atkinson RG, Gardner RC, MacRae EA. Sucrose phosphate synthase genes in plants belong to three different families. <i>J Mol Evol.</i> 2002 Mar;54(3):322-32.</p> <p>Chen S, Hajirezaei M, Börnke F. Differential expression of sucrose-phosphate synthase isoenzymes in tobacco reflects their functional specialization during dark-governed starch mobilization in source leaves. <i>Plant Physiol.</i> 2005 Nov;139(3):1163-74.</p>                                                                                                                                                                                                                                                                                                                                                                                                                                                                                                                                                                                                                                                                                                                                                                                                                                                                                                                                                                                                                                                                                                                                                                                                                                                                                                                                                                                                                                                                                                                                                                                                                                                                                                                                                                                                                      |                                                              |
| <p><b>Arabidopsis thaliana PDK1 3-phosphoinositide-dependent protein kinase-1</b><br/> <b>Notes: Sites not identified</b><br/> <b>References to 14-3-3 binding to PDK1</b><br/> Otterhag L, Gustavsson N, Alsterfjord M, Pical C, Lehrach H, Gobom J, Sommarin M. Arabidopsis PDK1: identification of sites important for activity and downstream phosphorylation of S6 kinase. <i>Biochimie.</i> 2006 Jan;88(1):11-21.</p>                                                                                                                                                                                                                                                                                                                                                                                                                                                                                                                                                                                                                                                                                                                                                                                                                                                                                                                                                                                                                                                                                                                                                                                                                                                                                                                                                                                                                                                                                                                                                                                                                                                                                                                                                                                                                                                                                                                                                                                                                                                                                                                                                                                                                                                                                                                                                                                                                                                                                                                                                                                                       | <p>Sites of 14-3-3 binding not defined.<br/> NO WEBLOGO.</p> |
| <p><b>Arabidopsis TPS5</b> Arabidopsis trehalose-phosphate synthase 5 (Swissprot = O23617)</p> <pre> 1  MVSRSYSNLLDLASGNFHSF SREKKRFRPV AVVTGVLSEL DDDNNSNSVC SDAPSSVTQD 61  RIIIVGNQLP IKSHRNSAGK LSFWDNDSL LLQLKDGMR EMEVVYIGCL KEQIDTVEQD 121 DVSQRLLLENF KCVPAYIPPE LFTKYHYGFC KQHLWPLFHY MLPLTPDLGG RFDRLWQAY 181 LSVNKIFADK VMEVISPD D FVWVHDYHLM VLPFLRKR FNRVKLGFFLH SPPFSSEIYR 241 TLPVRNELLR ALLNADLIGF HTFDYARHFL SCCSRMLG LSYQSKRGTIGL EYYGRVTSIK 301 ILPVGIIHSQ LQSILNLPET QTKVAELRDQ FLDQKVLG VDDMDIFKGIS LKLLAMEQLL 361 TQHPKRGGRV VLVQIANPAR GRGKDVQEVQ SETEATVKRI NEMFGRPGYQ PVVLIIDTPLQ 421 FFERIAYYVI AECCLVTA VR DGMNLIPEY IICRQGNPKL NETIGLDPSA AKKSMVLVSE 481 FIGCSPSLSG AIRVNPWNID AVTEAMDYAL IVSEAEKQMR HEKHHKYVST HDVAYWARSF 541 IQDLERACGD HVRKRCWGIG FGLGFRVVAL DPSFKKLSIE HIVSAYKRTK NRAILLDYDG 601 TMVQPGSIRT TPTRETIEIL NNLSSDPKNI VYLVSGKDRR TLTEWFSSCD DLGLGAEHGY 661 FIRPNDGTDW ETSSLVSGFE WKQIAEPV MR LYTETTDGST IETKETALVW NYQFADPDFG 721 SCQAKELMEH LESVLTNDPV SVKGTGQLVE VKPQGVNKG LVAERLLTMTQ EKGKLLDFIL 781 CVGDDRSDED MFEVIMSAKD GPALSPVAEI FACTVGQKPS KAKYYLDDTA EIIRMLDGLA 841 ATNTTISDQT DSTATVPTKD LF </pre> <p>&gt;gi 172044488 sp O23617.2 TPS5_ARATH RecName: Full=Alpha, alpha-trehalose-phosphate synthase [UDP-forming] 5; AltName: Full=Trehalose-6-phosphate synthase 5; Short=AtTPS5</p> <p>MVSRSYSNLLDLASGNFHSFSREKKRFRPVAVVTGVLSELDDNNSNSVCSAPSSVTQDRIRIIIVGNQLP IKSHRNSAGKLSFWDNDSL LLQLKDGMR EMEVVYIGCLKEQIDTVEQDDVSRQLENFKCVPAYIPPE LFTKYHYGFCQHLWPLFHYMLPLTPDLGGFRDRLWQAYLSVNIKIFADK VMEVISPD DDFVWVHDYHLM VLPFLRKR FNRVKLGFFLHSPFPFSSEIYR TLPVRNELLRALLNADLIGFHTFDYARHFLSCCSRMLG LSYQSKRGTIGLEYYGRVTSIKILPVGIIHSQLQSILNLPETQTKVAELRDQFLDQKVLGVDMDMIFKGIS LKLLAMEQLLTQHPKRGGRVVLVQIANPARGRGKDVQEVQSETEATVKRINEMFGRPGYQPVVLIIDTPLQ FFERIAYYVIAECCCLVTA VRDGMNLIPEYI IICRQGNPKLNETIGLDPSA AKKSMVLVSEFIGCSPSLSG AIRVNPWNIDAVTEAMDYALIVSEAEKQMRHEKHHKYVSTHDVAYWARSFIQDLERACGDHVRKRCWGIG FGLGFRVVALDPSFKKLSIEHIVSAYKRTKNRAILLDYDGTMVQPGSIRTPTRETIEILNNLSSDPKNI VYLVSGKDRRTLTEWFSSCD DLGLGAEHGYFIRPNDGTDWETSSLVSGFEWKQIAEPVMRLYTETTDGST IETKETALVWNYQFADPDFGSCQAKELMEHLESVLTNDPVSVKGTGQLVEVKPQGVNKG LVAERLLTMTQ EKGKLLDFILCVGDDRSDEDMFEVIMSAKDGALSPVAEIFACTVGQKPSKAKYYLDDTA EIIRMLDGLA ATNTTISDQTDSTATVPTKDLF</p> <p><b>Notes</b><br/> ((pS22)YSNLLDLASGNFHSFR) and (VA(pT49)VTGVLSELDDNNSNSVCSAPSSVTQDR) in Harthill et al (2006) = Ser5 and Thr32 in O23617. Both sites are conserved in TPS5, 7, 9 and 10.</p> <p><b>References to 14-3-3 binding to TPS5</b><br/> Harthill JE, Meek SE, Morrice N, Pegg MW, Borch J, Wong BH, Mackintosh C. Phosphorylation and 14-3-3 binding Arabidopsis trehalose-phosphate synthase 5 in response to 2-deoxyglucose. <i>Plant J.</i> 2006 Jul;47(2):211-23.</p> <p>Moorhead G, Douglas P, Cotelle V, Harthill J, Morrice N, Meek S, Deiting U, Stitt M, Scarabel M, Aitken A, MacKintosh C. Phosphorylation-dependent interactions between enzymes of plant metabolism and 14-3-3 proteins. <i>Plant J.</i> 1999 Apr;18(1):1-12.</p> |                                                              |
| <p><b>Hordeum vulgare ABF1, 2 and 3</b> ABF transcription factors</p> <p><b>Notes</b><br/> <b>References to 14-3-3 binding to ABF1, 2 and 3</b><br/> Schoonheim PJ, Costa Pereira DD, De Boer AH. Dual role for 14-3-3 proteins and ABF transcription factors in gibberellic acid and abscisic acid signalling in barley (<i>Hordeum vulgare</i>) aleurone cells. <i>Plant Cell Environ.</i> 2009 May;32(5):439-47.</p> <p>Takahashi Y, Kinoshita T, Shimazaki K. Protein phosphorylation and binding of a 14-3-3 protein in <i>Vicia</i> guard cells in response to ABA. <i>Plant Cell Physiol.</i> 2007 Aug;48(8):1182-91.</p> <p>Schoonheim PJ, Sinnige MP, Casaretto JA, Veiga H, Bunney TD, Quatrano RS, de Boer AH. 14-3-3 adaptor proteins are intermediates in ABA signal transduction during barley seed germination. <i>Plant J.</i> 2007 Jan;49(2):289-301.</p>                                                                                                                                                                                                                                                                                                                                                                                                                                                                                                                                                                                                                                                                                                                                                                                                                                                                                                                                                                                                                                                                                                                                                                                                                                                                                                                                                                                                                                                                                                                                                                                                                                                                                                                                                                                                                                                                                                                                                                                                                                                                                                                                                        | <p>Sites of 14-3-3 binding not defined.<br/> NO WEBLOGO.</p> |
| <p><b>Hordeum vulgare lipoxigenase 2 (LoxC)</b> (13-LOX)<sub>13</sub>-lipoxigenase (L37358) (GI:2429087)</p> <pre> 1  MLGVGIVSD LTGGIRGAHL KGSVVLMRKN ALDFNDFG AH VMDGVTELLG RGVTCQLISS 61  TNVDHNNNGR KGVGAEANLE QWLLPTNLFP ITTGENKFAV TFDWSVDKLG VPGAIIVKNN 121 HASEFFLKTI TLDNVPGRGT IVFVANSWVY PQAKYRYNRV FFANDTYLPH QMPAALPKPYR 181 DDELNRNLRGD DQQGFYLDHD RVYRYDVYND LGDSRDVLGG SKDLPYPRRC RTGRKPSDSK </pre>                                                                                                                                                                                                                                                                                                                                                                                                                                                                                                                                                                                                                                                                                                                                                                                                                                                                                                                                                                                                                                                                                                                                                                                                                                                                                                                                                                                                                                                                                                                                                                                                                                                                                                                                                                                                                                                                                                                                                                                                                                                                                                                                                                                                                                                                                                                                                                                                                                                                                                                                                                                                                | <p>Sites of 14-3-3 binding not defined.<br/> NO WEBLOGO.</p> |

|                                                                                                                                                                                                                                                                                                                                                                                                                                                                                                                                                                                                                                                                                                                                                                                                                                                                                                                                                                                                                                                                                                                                                                                                                                                                                                                                                                                                                                                                                                                                                                                                                                                                                                                                                                                                                                                                                                                                                                                                                                                                                                                                                                                                                                                                                                                                                                                                                                                                                                                                                                                                                                                                                                                                                                                                                             |                                                              |
|-----------------------------------------------------------------------------------------------------------------------------------------------------------------------------------------------------------------------------------------------------------------------------------------------------------------------------------------------------------------------------------------------------------------------------------------------------------------------------------------------------------------------------------------------------------------------------------------------------------------------------------------------------------------------------------------------------------------------------------------------------------------------------------------------------------------------------------------------------------------------------------------------------------------------------------------------------------------------------------------------------------------------------------------------------------------------------------------------------------------------------------------------------------------------------------------------------------------------------------------------------------------------------------------------------------------------------------------------------------------------------------------------------------------------------------------------------------------------------------------------------------------------------------------------------------------------------------------------------------------------------------------------------------------------------------------------------------------------------------------------------------------------------------------------------------------------------------------------------------------------------------------------------------------------------------------------------------------------------------------------------------------------------------------------------------------------------------------------------------------------------------------------------------------------------------------------------------------------------------------------------------------------------------------------------------------------------------------------------------------------------------------------------------------------------------------------------------------------------------------------------------------------------------------------------------------------------------------------------------------------------------------------------------------------------------------------------------------------------------------------------------------------------------------------------------------------------|--------------------------------------------------------------|
| <p>241 PDHESRLLLL VQNVYVLRDE LFGHLKQSDL LGYTLKGWLD GII LAIRTYV DLSPGEFDSF<br/> 301 ADILKLYEGG IKLPNIPALE EVRKRFPQL VKDLIPKGGD FLLKLPKPEI IKVDQKAWMT<br/> 361 DEEFAREMLA GVNPMMIKRL TEFPPKSTLD PSKYGDHST MTEEHVAKSL EGLTVQQALA<br/> 421 GNRLYIVDQH DNLMPFLIDI NNLDASFVYA TRTLLFLRGD GTLAPVAIEL SSPLIQGELT<br/> 481 TAKSAVYTPQ HAGVEGWIQ LAKAYASVND YGWHQLISHW LNTHAVMEPF VIATNRQLSV<br/> 541 THPVYKLLHP HYRDTMNIINA RARGLLINAG GVIEMTVFPH KHAMPSSMV YKHWNFTEQA<br/> 601 LPADLIKRM AVEDASSPHK VRLLIKDYPI ATDGLAVWDA IEQWVSXYLT IYYPNDGVLO<br/> 661 GDVELQAWWK EVREVGHDLD KDAAWPKMQ TVAELIKACA TIIWTGSALH AAVNFGQYPI<br/> 721 SGYHPNKPSA SRRPMPVQGS EYAELELDRP EKAFIRTITS QFHALVGISL MEILSKHSSD<br/> 781 EYVLGQHDT P AWTSDAKALE AFKRFGAKLE GIEKQVAMN SDPQLKNRG PAKFFPYMLLY<br/> 841 PNTSDHTGQA EGLTARGIPN SISI</p> <p>&gt;gi 2429087 gb AAB70865.1  lipoxygenase 2 [Hordeum vulgare subsp. vulgare]<br/> MLGVTGIVSADLTGGIRGAHLKGSVLMRKNALDFNDFGAHVMDGVTPELLGRGVTCLISSTNVHDHNNNGR<br/> GKVGAEANLEQWLLPTNLPFITTTGKFAVTFDWSVDKLGVPVGAIVKNNHASEFFLKTITLNDVPGRGT<br/> IVFVANSWVYPAKRYRNRVFFANDTYLPHQMPAALKPYRDELRNLRGDQQQGYLDHDRVYRYDYVND<br/> LGDSRDVLGGSKDLPYPRRCRTGRKPSDSKPDHESRLLLLQNVYVLRDELFGHLKQSDLLGYTLKGWLD<br/> GII LAIRTYV DLSPGEFDSFADILKLYEGG IKLPNIPALEEVKRFPQLVKDLIPKGGDFLLKLPKPEI<br/> IKVDQKAWMTDEEFAREMLAGVNPMMIKRLTEFPKSTLDPSKYGDHSTMTTEEHVAKSLEGLTVQQALA<br/> GNRLYIVDQHDNLMPFLIDINNLDASFVYATRLLFLRGDGTLAPVAIELSSPLIQGELTTAKSAVYTPQ<br/> HAGVEGWIQ LAKAYASVNDY GWHQLISHWLNTHAVMEPFVIATNRQLSVTHPVYKLLHPHYRDTMNIINA<br/> RARGLLINAGGVIEMTVFPHKHAMPSSMVYKHWNFTEQALPADLIKRMAVEDASSPHKVRLLIKDYPI<br/> ATDGLAVWDAIEQWVSXYLTIIYYPNDGVLOGDVELQAWWKEVREVGHDLDKDAAWPKMQTVAEIKACA<br/> TIIWTGSALHA AVNFGQYPI SGYHPNKPSA SRRPMPVQGS EYAELELDRPEKAFIRTITSQFHALVGISL<br/> MEILSKHSSDEVYVLGQHDTPAWTSDAKALEAFKRFGAKLE GIEKQVAMNSDPQLKNRGPAKFFPYMLLY<br/> PNTSDHTGQAEGLTARGIPNSISI</p> <p><b>Notes</b><br/> RKPSDSKP at position 234 is suggested as a potential 14-3-3-binding site, but no experimental data on site.</p> <p><b>References to 14-3-3 binding to 13-LOX</b><br/> Holtman WL, Roberts MR, Oppedijk BJ, Testerink C, van Zeijl MJ, Wang M. 14-3-3 proteins interact with a 13-lipoxygenase, but not with a 9-lipoxygenase. <i>FEBS Lett.</i> 2000 May 26;474 (1):48-52.<br/> Holtman WL, Roberts MR, Wang M. 14-3-3 proteins and a 13-lipoxygenase form associations in a phosphorylation-dependent manner. <i>Biochem Soc Trans.</i> 2000 Dec;28(6):834-6.</p>                                                                                                                                                                                                                                                                                                                                                   |                                                              |
| <p><b>Hordeum vulgare vacuolar H(+)-ATPase (V-ATPase) (Genbank Q40002)</b></p> <p>1 ELVRVGHDSL IGEIIRLEGD SATIQVYEET AGLTVNDPVL RTKKPLSCEL GPGILGNIFD<br/> 61 GIQRPLKTIA IKS RDVYIPR GVSVPALDKD QLWEFQPNKL GVGDNITNGD LYATVFENTL<br/> 121 MKHHIALPPG AMGKISYIAP AGQYSLQDTV LELEFQGIKK EFTMLHTWVP RTRPRVASKL<br/> 181 AADTPLLTGQ RVLDA LFPSV LGGTCAIPGA FCGKTVISQ ALSKYSNSDT VVYVCGGERG<br/> 241 NEMAEVLMDF PQLTMTLPDG REESVMKRTP LVANTSMPV AAREASYTG ITIAEYFRDM<br/> 301 GYNVSMADS TSWAEALRE ISGRLAEMPA DSGYPAYLAS RLASFYERAG KVQCLGSPDR<br/> 361 TGSVTIVGAV SPPGGDFSDP VTSATLSIVQ VFVGLDKKLA QRKHFPSVNW LISYSKYSTA<br/> 421 LEGYKFDYP GFIDMRKAR EVLQREDDLNEIVQLVGKDA LGESDKITLE TAKLLREDDYL<br/> 481 AQNAFTPYDK YCPFYKSVWM MRNIIHFNQL ANQAVERAAN ADGHKITYAV VKSRMGDLFY<br/> 541 RLVSQKFEDP AEGEDVLVAK FQKLYDDLT A GFRNLEDEAR</p> <p>&gt;gi 2493123 sp Q40002.1 VATA_HORVU RecName: Full=V-type proton ATPase catalytic subunit A; Short=V-ATPase subunit A; AltName: Full=Vacuolar proton pump subunit alpha; AltName: Full=V-ATPase 69 kDa subunit<br/> ELVRVGHDSLIGEIRLEGD SATIQVYEETAGLTVNDPVLRTKKPLSCELGPGILGNIFDGIQRPLKTIA<br/> IKSRDVIIPRGVSVPALDKDQLWEFQPNKLGVDNITNGDLYATVFENTLMKHHIALPPGAMGKISYIAP<br/> AGQYSLQDTVLELEFQGIKK EFTMLHTWVPVTRPRVASKLAADTPLLTVGLDFPSV LGGTCAIPGA<br/> FCGKTVISQALSKYSNSDTVVYVCGGERGNEMAEVLMDFPQLTMTLPDGREESVMKRTP TLVANTSMPV<br/> AAREASYTGITIAEYFRDMGYNVSMADSTSRWAEALREISGRLAEMPADSGYPAYLASRLASFYERAG<br/> KVQCLGSPDR TGSVTIVGAVSPPGGDFSDPVTSATLSIVQVFVGLDKKLAQRKHFPSVNW LISYSKYSTA<br/> LEGYKFDYPGFIDMRKAREVLQREDDLNEIVQLVGKDALGESDKITLETAKLLREDDYLAQNAFTPYDK<br/> YCPFYKSVWMRNI I HFNQLANQAVERAANADGHKITYAVVKS RMGDLFYRLVSQKFEDPAEGEDVLVAK<br/> FQKLYDDLTAGFRNLEDEAR</p> <p><b>Notes</b><br/> <b>14-3-3 binding sites not defined</b><br/> Klychnikov et al (2007) used endogenous protein from barley tonoplast membranes but suggested the sequence above and mentioned RGV<sup>S53</sup>V and RLVS<sup>S44</sup>QK as being putative 14-3-3 binding sites that are conserved in other species with the 544 site being phosphorylated in the Maize equivalent. The catalytic A subunit of the V-ATPase binds directly to 14-3-3s in an overlay and can be phosphorylated in vitro with endogenous kinases in the tonoplast membrane purification (where the kinase properties are affected by blue light) but sites of phosphorylation were not identified. Conclusions, “the data show that besides the P- and F-type H+-ATPases, the V-type H+-ATPase also interacts with 14-3-3 proteins”</p> <p><b>References to 14-3-3 binding to V-ATPase</b><br/> Klychnikov OI, Li KW, Lill H, de Boer AH. The V-ATPase from etiolated barley (<i>Hordeum vulgare</i> L.) shoots is activated by blue light and interacts with 14-3-3 proteins. <i>J Exp Bot.</i> 2007;58(5):1013-23.</p> | <p>Sites of 14-3-3 binding not defined.<br/> NO WEBLOGO.</p> |
| <p><b>Medicago truncatula GS2 (plastid glutamine synthetase) (Genbank AY225150)</b></p> <p>1 MAQILAPSTQ CQARITKISP VATPISSKMW SSLVMKONKK VARSAKFRVM AVNSGTINRV<br/> 61 EDLNLNDITP FTDSIIAEYI WIGTGIDVR SKSRTI S KPV EHPSELPKWN YDGSSTGQAP<br/> 121 GEDSEVILYP QAIKDPFRG GNNILVICDA YTPQGEPIPT NKRHKAEIF SNPKVEAEIP<br/> 181 WYGIQEYETL LQTDVKWPLG WPGVGGYPGQ GPYCAAGAD KSFGRDISLA HYKACLYAGI<br/> 241 NISGTNGEVM PGQWEYQVGP SVGIEAGDHI WASRYILERI TEQAGVVLTD DPKPIEGDWN<br/> 301 GAGCHTNYST KSMREDDGGFE VIKKAILNLS LRHKIHIEAY GEGNERLGT KHETASINTF<br/> 361 SWGVANRGS IRVGRDTEKN GKGYLEDRR ASNMDPYVVT ALLAESTLLW EPTLEAEALA<br/> 421 AOKIALKV</p>                                                                                                                                                                                                                                                                                                                                                                                                                                                                                                                                                                                                                                                                                                                                                                                                                                                                                                                                                                                                                                                                                                                                                                                                                                                                                                                                                                                                                                                                                                                                                                                                                                                                                                                                                                                                                                                                                                                                                                                                                                                                                                                                                                           |                                                              |



|                                                                                                                                                                                                                                                                                                                                                                                                                                                                                                                                                                                                                                                                                                                                                                                                                                                                                                                                                                                                                                                                                                                                                                                                                                                                                                                                                                                                                                                                                                                                                                                                                                                                                                                                                                                                                                                                                                                                                                                                                                                                                                                                                                                                                                                                                                                                                                                                                                                                                                                                                                                                                                                                                       |                                                         |
|---------------------------------------------------------------------------------------------------------------------------------------------------------------------------------------------------------------------------------------------------------------------------------------------------------------------------------------------------------------------------------------------------------------------------------------------------------------------------------------------------------------------------------------------------------------------------------------------------------------------------------------------------------------------------------------------------------------------------------------------------------------------------------------------------------------------------------------------------------------------------------------------------------------------------------------------------------------------------------------------------------------------------------------------------------------------------------------------------------------------------------------------------------------------------------------------------------------------------------------------------------------------------------------------------------------------------------------------------------------------------------------------------------------------------------------------------------------------------------------------------------------------------------------------------------------------------------------------------------------------------------------------------------------------------------------------------------------------------------------------------------------------------------------------------------------------------------------------------------------------------------------------------------------------------------------------------------------------------------------------------------------------------------------------------------------------------------------------------------------------------------------------------------------------------------------------------------------------------------------------------------------------------------------------------------------------------------------------------------------------------------------------------------------------------------------------------------------------------------------------------------------------------------------------------------------------------------------------------------------------------------------------------------------------------------------|---------------------------------------------------------|
| <p>&gt;gi 28629470 gb AAO37651.1  glutamine synthetase [Medicago truncatula]<br/> MAQILAPSTQCQARITKISPVATPISCKMWSLVMKQNKVARSARFVMAVNSGTINRVEDLLNLDITP<br/> FTDSIIAEYIWIGGTGIDVRSKSRITISKVPEHPSLEPKWNYDGSSTGQAPGEDSEVILYPOAIFKDPFRG<br/> GNNILVICDAYTPQGEPIPTNKRHKAEEIFSNPKVEAEIPWYIGIEQYETLLQTDVWVPLGWVPGGYPGPQ<br/> GPYYCAAGADKSFGRDISDAHYKACLYAGINISGTNGEVMGQWEYQVGPVSVGIEAGDHIWASRYILERI<br/> TEQAGVVLTLDPKPIEGDMWNGAGCHTNYSTKSMREDGGFEVIKKA ILNLSLRHKKIHIEAYGEGNERRLTG<br/> KHETASINTFSWGVANRGC SIRVGRDTEKNGKGYLEDRRPASNMOPYVVTALLAESTLLWEPTLEAEALA<br/> AQKIALKV</p> <p><b>Notes</b><br/> (Ser97) crucial for the interaction with 14-3-3s. Different plant extracts were used as kinase in vitro phosphorylations. CDPK (calcium dependent protein kinase) phosphorylates GS2<br/> Leaf extract passed over a 14-3-3 column – GS2 degradation product appeared to be specifically eluted (shown by anti-GS antibody) and this product showed no GS activity suggesting GS2 degradation is induced by 14-3-3 binding. 14-3-3 only bound a phosphorylated GS column and the GS (only in this sample) had the degradation product S97A mutant shows 2 fold reduction in incorporation of 32P-ATP so is phosphorylated in leaf extracts<br/> Site is well conserved among other plant chloroplastic GS<br/> GS2 WT and S97A were bound to a column and in vitro phosphorylated with leaf extract. 14-3-3 was added. <b>Result:</b> 14-3-3 only bound the WT column and GS was only degraded in this sample.<br/> <b>S97D phosphomimetic bound</b> to the 14-3-3 column but no degradation<br/> S97D phosphomimetic phosphorylated with leaf extract bound the column and there was degradation so the protease comes from the leaf extract<br/> Conclusions: S97 phosphorylation induces 14-3-3 binding and GS2 is proteolytically cleaved. Proteolytic cleavage decreases the GS activity not 14-3-3 binding.<br/> AEYIWIGGTGIDVRSKSRITISKVPEHPSLEPKWNYDGSSTG – SER 97</p> <p><b>References to 14-3-3 binding to GS2</b><br/> Lima L, Seabra A, Melo P, Cullimore J, Carvalho H. Phosphorylation and subsequent interaction with 14-3-3 proteins regulate plastid glutamine synthetase in Medicago truncatula. <i>Planta</i>. 2006 Feb;223(3):558-67.<br/> Finnemann J, Schjoerring JK. Post-translational regulation of cytosolic glutamine synthetase by reversible phosphorylation and 14-3-3 protein interaction. <i>Plant J</i>. 2000 Oct;24(2):171-81.<br/> Riedel J, Tischner R, Mäck G. The chloroplastic glutamine synthetase (GS-2) of tobacco is phosphorylated and associated with 14-3-3 proteins inside the chloroplast. <i>Planta</i>. 2001 Jul;213(3):396-401.</p> |                                                         |
| <p><b>Nicotiana tabacum DBP1 (DNA-binding protein phosphatase-1) (GenBank AF520810)</b><br/> 1 MCVQEESEVSEEMENLDISKSDENIKIGSLQVEDELGNTQKENCEKNTSSSFSVIRNSFP<br/> 61 MESISEDTTI ADRKQILSNK FLPTLRSGEW SDIGGRDME DTHICIAADLA KNFGQSILGE<br/> 121 EEAVSYFYGVF DGHGGKGAAL FVRDFLPRII VEDADFPKLL EKVVSKSFL E TDAFAKSCS<br/> 181 ADSLSSGTT ALTAMIFGRS LLVANAGDCR AVLSRGGGLAI EMSKDRHPCC VSERTRVESL<br/> 241 GGFVDDGYLN QGLGVTRALG DWHIKGLKEV EKGGLSAEP ELKLLTLTKE DEFLLIGSDG<br/> 301 IWDVFRSQNA VDFARRLQE HNNAKLCKE VVDEAKKRG A IDNLTVMVC FHSEPPPTIV<br/> 361 FQRSRIRKCI SAEGLQNLRS LLDG</p> <p>&gt;gi 21693562 gb AAM75346.1 AF520810_1 DNA-binding protein phosphatase 2C [Nicotiana tabacum]<br/> MCVQEESEVSEEMENLDISKSDENIKIGSLQVEDELGNTQKENCEKNTSSSFSVIRNSFP<br/> MESISEDTTI ADRKQILSNKFLPTLRSGEWSDIGGRDME DTHICIAADLAKNFGQSILGEEAVSYFYGVF DGHGGKGAAL<br/> FVRDFLPRII VEDADFPKLL EKVVSKSFL E TDAFAKSCS ADSLSSGTTALTAMIFGRS LLVANAGDCR<br/> AVLSRGGGLAI EMSKDRHPCC VSERTRVESL GGFVDDGYLN QGLGVTRALG DWHIKGLKEV EKGGLSAEP<br/> ELKLLTLTKE DEFLLIGSDG IWDVFRSQNA VDFARRLQE HNNAKLCKE VVDEAKKRG A IDNLTVMVC<br/> FHSEPPPTIV FQRSRIRKCI SAEGLQNLRS LLDG</p> <p><b>Notes</b><br/> <b>14-3-3 binding sites not defined</b><br/> “Tobacco DBP1 is the founding member of a novel class of plant transcription factors featuring sequence-specific DNA binding and protein phosphatase activity”.<br/> Underlined region is necessary for 14-3-3 G isoform binding using Y2H and is contained in the sequence-specific DNA binding domain (1-87). Same result with the Arabidopsis homologue (DBP1 - NM_128120 and GRF6 - NM_121083)<br/> DBP1 has an NLS in the c-term and binds the CEVII gene promoter in healthy leaves to repress CEVII translation. In excised leaves, 14-3-3 G accumulates in the nucleus and binds DBP1, which is then exported to the cytoplasm, allowing CEVII expression.</p> <p><b>References to 14-3-3 binding to Tobacco DBP1</b><br/> Carrasco JL, Castelló MJ, Vera P. 14-3-3 mediates transcriptional regulation by modulating nucleocytoplasmic shuttling of tobacco DNA-binding protein phosphatase-1. <i>J Biol Chem</i>. 2006 Aug 11;281(32):22875-81.</p>                                                                                                                                                                                                                                                                                                                                                                                                                                                                                                | <p>Sites of 14-3-3 binding not defined. NO WEBLOGO.</p> |
| <p><b>Nicotiana tabacum RhoGTPase activating protein 1 (Genbank DQ813657)</b><br/> 1 MTEVLHSSSP SSSSPSISTP TRNGHTLFVE EELERGSEVA VCDSEEEIEE KKRDKERRDH<br/> 61 LSLALLLVTL FRKSFWMACK TDREGGGDLG GSGRMEIGW PTNVRHVAVH TDFRNGFLG<br/> 121 LPVEFEPEVS RRAPSASTTV FGVSTESMQL SFDSEVVP TILLLMQRRR YAQGGQLQAE<br/> 181 IFRINAENSE EELVREQLNR GIVPDGIDVH CLAGLIKAWF RELPSGVLDL LSPEQVMQCQ<br/> 241 SEDDSIALVR LLPTEAALL DWAINLMADV VQEEHLNKMN TRNIAMVFAE NMTQMDPLT<br/> 301 ALMYAVQVMN FLRTLIERL KEREDSLIEP ASVSNLGRPD ENGRQSPQQL SLGNSNESNE<br/> 361 LTEQVYTVVE PDSARVSEN RVDNITDDEY LSYTTSSEES DSVSCEPPI HVSTMAREAC<br/> 421 VTKGPVFEED AQRIGQSSDS SPMKDVLLKID LEPTAVQSLG NDSKSKGISN LSRINSMTER<br/> 481 TEAWR</p> <p>&gt;gi 110676572 gb ABG85154.1  RhoGAP1 [Nicotiana tabacum]<br/> MTEVLHSSSPSSSPSISTPTRNGHTLFVEEEIERGSEVAVCDSEEEIEEKKRDKERRDHL SLLALLLVTL<br/> FRKSFWMACKTDREGGGDLGCGSGRMEIGWPTNVRHVAVHTDFRNGFLGLPVEFEPEVSRAPSASTTV<br/> FGVSTESMQLSFDSEVVP TILLLMQRRRYAQGGQLQAE IFRINAENSEEELVREQLNRGIVPDGIDVH<br/> CLAGLIKAWFRELP SGVLDL TSPEQVMQCQ SEDDSIALVRLLPTEAALLDWAINLMADVQEEHLNKMN<br/> TRNIAMVFAE NMTQMDPLTALMYAVQVMN FLRTLIERLKEREDSLIEPASVSNLGRPD ENGRQSPQQL</p>                                                                                                                                                                                                                                                                                                                                                                                                                                                                                                                                                                                                                                                                                                                                                                                                                                                                                                                                                                                                                                                                                                                                                                                                                                                                                                                                                                                                                                                                                                         | <p>Sites of 14-3-3 binding not certain. NO WEBLOGO.</p> |

|                                                                                                                                                                                                                                                                                                                                                                                                                                                                                                                                                                                                                                                                                                                                                                                                                                                                                                                                                                                                                                                                                                                                                                                                                                                                                                                                                                                                                                                                                                                                                                                                                                                                                                                                                                                                                                                                                                                                                                                                                                                                                                                                                                                                                                                                                                                                                                  |  |
|------------------------------------------------------------------------------------------------------------------------------------------------------------------------------------------------------------------------------------------------------------------------------------------------------------------------------------------------------------------------------------------------------------------------------------------------------------------------------------------------------------------------------------------------------------------------------------------------------------------------------------------------------------------------------------------------------------------------------------------------------------------------------------------------------------------------------------------------------------------------------------------------------------------------------------------------------------------------------------------------------------------------------------------------------------------------------------------------------------------------------------------------------------------------------------------------------------------------------------------------------------------------------------------------------------------------------------------------------------------------------------------------------------------------------------------------------------------------------------------------------------------------------------------------------------------------------------------------------------------------------------------------------------------------------------------------------------------------------------------------------------------------------------------------------------------------------------------------------------------------------------------------------------------------------------------------------------------------------------------------------------------------------------------------------------------------------------------------------------------------------------------------------------------------------------------------------------------------------------------------------------------------------------------------------------------------------------------------------------------|--|
| <p>SLGNSNESNELTEQVYTVVEEFPDSARVSESNRVDNITDDEYLSYTTSSSEESDDSVSCETPIHVSTMAREAC<br/>VTKGFNFEEAQRIGQSSDSSPMKDVLLKIDLEPTAVQSLGNDSSKSGISNLSRINSMTERTEAWR</p> <p><b>Notes – 14-3-3 binding sites not clearly defined but S158 may be involved</b><br/>Good sequence conservation of the RhoGap and CRIB (Cdc42/Rac-interactive binding = domain is thought to specifically bind activated GTPases but function of RhoGAPs Crib domain is unknown) domains between other plant species.<br/>N-terminus of RhoGAP1 necessary for subapical localization i.e. did Y2H with N-term.<br/>N. tabacum 14-3-3 b-1 (GenBank accession number BAD12169) came out.<br/>In vitro, 14-3-3 b-1 had no effect on the GAP activity of RhoGAP1 for RAC5<br/><b>S158A</b> mutant in a 14-3-3 consensus localised more strongly to the membrane however, yeast two-hybrid interaction assays and attempts to demonstrate in vitro interaction differences could not confirm these data</p> <p><b>References to 14-3-3 binding to Tobacco RhoGTPase activating protein 1</b><br/>Klahre U, Kost B. Tobacco RhoGTPase ACTIVATING PROTEIN1 spatially restricts signaling of RAC/Rop to the apex of pollen tubes. <i>Plant Cell</i>. 2006 Nov;18(11):3033-46.</p>                                                                                                                                                                                                                                                                                                                                                                                                                                                                                                                                                                                                                                                                                                                                                                                                                                                                                                                                                                                                                                                                                                                              |  |
| <p><b>Nicotiana tabacum RSG</b> (Tobacco Repression of shoot growth; bzip transcription factor) (Swissprot = Q9LRC7)</p> <pre> 1 MDPKFSGKPI PIPFLAGRTD LDQMPDTPTR IARHRRRAQSE TFFRFPDFDD DILLDDVVAD 61 FNLDISAPSL SPSADTHMQP ANSADSSSTG GPGLMSGPGA NNNPRPLNH F RSLSDVADFF 121 DGLEFGATTP GAAAEEEKV FGSSSVSGS TRHRHSNSMD GSFSTASFEA ECSSSVKKAM 181 APDRLAELAL IDPKRAKRIL ANRQSAARSK ERKIRYTSSEL ERKVQTLQTE ATTLQAQITV 241 LQRDNMGLTN ENKELKLRQL ALEQGAHLRD ALNEALREEL QRLKIAAGQI LGANGNRGPR 301 PHFPPQPQSF VQCGSHHAQQ QQQHMPHSTT STQNI GGQTQ P S F M N F N N R G </pre> <p>&gt;gi 75311483 sp Q9LRC7 Q9LRC7_TOBAC BZIP transcriptional activator RSG<br/>MDPKFSGKPIPIPFLAGRTDLDQMPDTPTR IARHRRRAQSE TFFRFPDFDD DILLDDVVADFNLDISAPSL<br/>SPSADTHMQPANSADSSSTGGPGLMSGPGANNPRPLNHFRSLSDVADFFDGLEFGATTPGAAAEEEKV<br/>FGSSSVSGSTRHRHSNSMDGSFSTASFEAECSSSVKKAMAPDRLAELALIDPKRAKRILANRQSAARSK<br/>ERKIRYTSSELERKVQTLQTEATTLQAQITV LQRDNMGLTNENKELKLRQLALEQGAHLRDALNEALREEL<br/>QRLKIAAGQI LGANGNRGPRPHFPPQPQSFVQCGSHHAQQQQQHMPHSTTSTQNI GGQTQPSFMNFNRRG</p> <p><b>Notes</b><br/>RSG is a bzip transcription factor . NHFRSLpS<sup>114</sup>VDAD</p> <p><b>References to 14-3-3 binding to RSG</b><br/>Ishida S, Yuasa T, Nakata M, Takahashi Y. A tobacco calcium-dependent protein kinase, CDPK1, regulates the transcription factor REPRESSION OF SHOOT GROWTH in response to gibberellins. <i>Plant Cell</i>. 2008 Dec;20(12):3273-88.<br/>Schoonheim PJ, Veiga H, Pereira Dda C, Friso G, van Wijk KJ, de Boer AH. A comprehensive analysis of the 14-3-3 interactome in barley leaves using a complementary proteomics and two-hybrid approach. <i>Plant Physiol</i>. 2007 Feb;143(2):670-83.<br/>Ishida S, Fukazawa J, Yuasa T, Takahashi Y. Involvement of 14-3-3 signaling protein binding in the functional regulation of the transcriptional activator REPRESSION OF SHOOT GROWTH by gibberellins. <i>Plant Cell</i>. 2004 Oct;16(10):2641-51.<br/>Igarashi D, Ishida S, Fukazawa J, Takahashi Y. 14-3-3 proteins regulate intracellular localization of the bZIP transcriptional activator RSG. <i>Plant Cell</i>. 2001 Nov;13(11):2483-97.<br/>Nakata M, Yuasa T, Takahashi Y, Ishida S. CDPK1, a calcium-dependent protein kinase, regulates transcriptional activator RSG in response to gibberellins. <i>Plant Signal Behav</i>. 2009 May;4(5):372-4.</p> |  |
| <p><b>Poplar NIMA-related kinase 1 (PNek1) (Uniprot Q8SA64)</b></p> <pre> 1 MEQYEVLEQI GKGSFGSALL VKHKHEKKY VLKKIRLARQ TDRSRSAHQ EKELISRIRN 61 PFIVEYKDSW VEKGCYVCI IIGYCEGGDMA EAIKKANGVH FPEEKLCCKWL VQLLMALDYL 121 HMNHILHRDV KCSNIFLTKG QDIRLGD FGLAKILTSDDLASSVVGTPSYMCPPELLADIPY 181 GSKSDIWSLGC CIYEMTSLK PAFKAFDMQA LINKINKSIV APLPTKYSGA FRGLVKSMRLR 241 KNPELRPSAA ELLRHPHLQP YVLKIH IKMN SPRQNTLPFQ WPEPHYMKKT KFLVPEDNPL 301 KAHRKRYSL SDRALNPSI SAAEQDSVCS TEGIHDTPSY LNQSLSDSSI ESSHEGTVIC 361 RSIASKPSNF AKTTKPAPTK ASVTTRRRTE PVKKRESLPV TRTPTKKSNP TTRRSLPLP 421 SRTAQNSAH GTNNSILLQI KSPDVSVNAP RIDRIAEPFL ASYDKPYLPF RRTSSSTAQG 481 SSNSLHHGDR SITKDKCTVQ ISDRTSAPKN FTEAWQGIEH GMFQVDEENG SNSSNQNATA 541 GASSRTSSDI RRRRFDTSSE QQRAEALEGL LEFSARLLQD ARYDELGVLL KFPFGPKVSP 601 RETAIWLTKS FKENTAKTED C </pre> <p>&gt;tr Q8SA64 Q8SA64_9ROSI NIMA-related protein kinase OS=Populus tremula x<br/>Populus alba PE=2 SV=1<br/>MEQYEVLEQIGKGSFGSALLVKHKHEKKYVLKKIRLARQTDRSRSAHQEKELISRIRN<br/>PFIVEYKDSWVEKGCYVCI IIGYCEGGDMAEAIKKANGVHFPEEKLCCKWL VQLLMALDYL<br/>HMNHILHRDVKCSNIFLTKGQDIRLGD FGLAKILTSDDLASSVVGTPSYMCPPELLADIPY<br/>GSKSDIWSLGC CIYEMTSLKPAFKAFDMQALINKINKSIVAPLPTKYSGA FRGLVKSMRLR<br/>KNPELRPSAAELLRHPHLQPYVLKIH IKMNSPRQNTLPFQWPEPHYMKKT KFLVPEDNPL<br/>KAHRKRYSLSDRALNPSISAAEQDSVCS TEGIHDTPSYLNQSLSDSSI ESSHEGTVIC<br/>RSIASKPSNFAKTTKPAPTKASVTTRRRTEPVKKRESLPVTRTPTKKSNPTTRRSLPLP<br/>SRTAQNSAHGTNNSILLQIKSPDVSVNAPRIDRIAEPFLASYDKPYLPFRRTSSSTAQG<br/>SSNSLHHGDRSITKDKCTVQISDRTSAPKNFTEAWQGIEHGMFQVDEENG SNSSNQNATA<br/>GASSRTSSDIRRRRFDTSSEQQRAEALEGLLEFSARLLQDARYDELGVLLKFPFGPKVSP<br/>RETAIWLTKSFKENTAKTEDC</p> <p><b>Notes</b><br/>Within 463 – 606 is a homodimerisation domain<br/><b>T276, T389 and S416</b> are putative 14-3-3 binding motifs<br/>In Y2H only <b>S416A</b> reduced interaction with 14-3-3<br/>Four Arabidopsis Neks show good sequence conservation of the 14-3-3 motif at S416 with only differences in the -1, +1 or +2 position<br/>K33R mutation in the ATP binding loop abolishes kinase activity and decreased 14-3-3 binding.<br/>T389A weakened homodimerisation</p>                                                                                                                                                                                                                   |  |

|                                                                                                                                                                                                                                                                                                                                                                                                                                                                                                                                                                                                                                                                                                                                                                                                                                                                                                                                                                                                                                                                                                                                                                                                                                                                                                                                                                                                                                                                                                                                                                                                                                                                                                                                                                                                                                                                                                                                                                                                                                                                                                                                                                                                                                                                                                                                                                                                                                                                                                                                                                                                                                                                                                                                                                                                                                                                                                                                                                                                                                                                                                                                                                                                                                                                                                                                                                                                          |                                                             |
|----------------------------------------------------------------------------------------------------------------------------------------------------------------------------------------------------------------------------------------------------------------------------------------------------------------------------------------------------------------------------------------------------------------------------------------------------------------------------------------------------------------------------------------------------------------------------------------------------------------------------------------------------------------------------------------------------------------------------------------------------------------------------------------------------------------------------------------------------------------------------------------------------------------------------------------------------------------------------------------------------------------------------------------------------------------------------------------------------------------------------------------------------------------------------------------------------------------------------------------------------------------------------------------------------------------------------------------------------------------------------------------------------------------------------------------------------------------------------------------------------------------------------------------------------------------------------------------------------------------------------------------------------------------------------------------------------------------------------------------------------------------------------------------------------------------------------------------------------------------------------------------------------------------------------------------------------------------------------------------------------------------------------------------------------------------------------------------------------------------------------------------------------------------------------------------------------------------------------------------------------------------------------------------------------------------------------------------------------------------------------------------------------------------------------------------------------------------------------------------------------------------------------------------------------------------------------------------------------------------------------------------------------------------------------------------------------------------------------------------------------------------------------------------------------------------------------------------------------------------------------------------------------------------------------------------------------------------------------------------------------------------------------------------------------------------------------------------------------------------------------------------------------------------------------------------------------------------------------------------------------------------------------------------------------------------------------------------------------------------------------------------------------------|-------------------------------------------------------------|
| <p>383 – 457 was not enough to bind 14-3-3 in the Y2H domain suggesting that homodimerisation domain was necessary too.</p> <p>In silico analyses predict that mammalian Nek1, Nek3, Nek4, Nek9, Nek10 and Neurospora Nim1 have potential 14-3-3 interaction motifs, all located in their C-terminal region (data not shown).</p> <p>Expression of the mRNA is cell cycle regulated but no mention of what kinase phosphorylates it and protein shows a nucleolar localisation. No mention of how 14-3-3 fits into this.</p> <p><b>References to 14-3-3 binding to Pnek1</b><br/>Cloutier M, Vigneault F, Lachance D, Séguin A. Characterization of a poplar NIMA-related kinase Pnek1 and its potential role in meristematic activity. FEBS Lett. 2005 Aug 29;579(21):4659-65.</p>                                                                                                                                                                                                                                                                                                                                                                                                                                                                                                                                                                                                                                                                                                                                                                                                                                                                                                                                                                                                                                                                                                                                                                                                                                                                                                                                                                                                                                                                                                                                                                                                                                                                                                                                                                                                                                                                                                                                                                                                                                                                                                                                                                                                                                                                                                                                                                                                                                                                                                                                                                                                                      |                                                             |
| <p><b>Rice ACC synthase 1 (Genbank AC135965 but this gives a human chromosome 3 complete clone)</b></p> <p><b>Notes</b><br/><b>References to 14-3-3 binding to rice ACC synthase 1</b><br/>Yao Y, Du Y, Jiang L, Liu JY. Interaction between ACC synthase 1 and 14-3-3 proteins in rice: a new insight. Biochemistry (Mosc). 2007 Sep;72(9):1003-7.</p>                                                                                                                                                                                                                                                                                                                                                                                                                                                                                                                                                                                                                                                                                                                                                                                                                                                                                                                                                                                                                                                                                                                                                                                                                                                                                                                                                                                                                                                                                                                                                                                                                                                                                                                                                                                                                                                                                                                                                                                                                                                                                                                                                                                                                                                                                                                                                                                                                                                                                                                                                                                                                                                                                                                                                                                                                                                                                                                                                                                                                                                  | <p>Sites of 14-3-3 binding not defined.<br/>NO WEBLOGO.</p> |
| <p><b>Rice VPI (VIVIPAROUS1)</b></p> <p><b>Notes</b><br/><b>References to 14-3-3 binding to VPI</b><br/>Schultz TF, Medina J, Hill A, Quatrano RS. 14-3-3 proteins are part of an abscisic acid-VIVIPAROUS1 (VP1) response complex in the Em promoter and interact with VP1 and EmBPI. Plant Cell. 1998 May;10(5):837-47.</p>                                                                                                                                                                                                                                                                                                                                                                                                                                                                                                                                                                                                                                                                                                                                                                                                                                                                                                                                                                                                                                                                                                                                                                                                                                                                                                                                                                                                                                                                                                                                                                                                                                                                                                                                                                                                                                                                                                                                                                                                                                                                                                                                                                                                                                                                                                                                                                                                                                                                                                                                                                                                                                                                                                                                                                                                                                                                                                                                                                                                                                                                            | <p>Sites of 14-3-3 binding not defined.<br/>NO WEBLOGO.</p> |
| <p><b>Tomato SPAK (Genbank acc. = AF079103)</b></p> <pre> 1 MEQYEILEQI GKGAFGSAVL VKHKLEKKKY VLKKIRLARQ TDRTRRNAHQ EMALISSMQN 61 PFIVEYKDSW VEKGCYVCIV IGYCEGGDMA EAIKKAQGVH FLEEKLCCKWL VQLLMALDYL 121 HTNHILHRDV KCSNIFLTRE QDIRLGDFGL AKMLTSDDLA SSVIGTPSYM CPELLADIPI 181 GSKSDIWSLG CCIYEMAAFK PAFKAFDMQA LINKINKSIV APLPTKYSVP FRGLVKSMLR 241 KNPELRPSAA ELLRNPLLPQ YVINTHLKLN GPRRNSLPAC LPDNDVKKTR FAISESTPVK 301 KNREKRMSCG NDRTLNPSVS DHDTFNSNRR YPKTPSRVSE LSVGSPDRGS TVTKKITSKA 361 LLVKNPQVI VPKLTTTPAR QVDLRNSDMA SRTLVKRSVS TTRRASLPLT NKAQVQELPR 421 RPSSLFLDCI KSPDVSVNAP RIDKMLEFPL ASYEDPFHPI RRTSSNSAQG SSGSPQAEYS 481 VMKDKCTIQI PDSKFDRMSS NDAWQGYEGE MVHVDREDIT DSSDQNTAG ASSRTSSDTR 541 RRRFNMSSYK QRAEALEGLL EFSARLLQED RFDELGVLLK PFGPEKVSPP ETAIWLTKSI 601 KENAPKQED </pre> <p>&gt;gi 15637110 gb AAL04423.1  LSTK-1-like kinase [Lycopersicon esculentum]<br/>MEQYEILEQI GKGAFGSAVL VKHKLEKKKY VLKKIRLARQ TDRTRRNAHQ EMALISSMQN PFIVEYKDSW VEKGCYVCIV IGYCEGGDMA EAIKKAQGVH FLEEKLCCKWL VQLLMALDYL HTNHILHRDV KCSNIFLTRE QDIRLGDFGL AKMLTSDDLA SSVIGTPSYM CPELLADIPI YGSKSDIWSLG CCIYEMAAFK PAFKAFDMQA LINKINKSIV APLPTKYSVP FRGLVKSMLR KNPELRPSAA ELLRNPLLPQ YVINTHLKLN GPRRNSLPAC LPDNDVKKTR FAISESTPVK KNREKRMSCG NDRTLNPSVS DHDTFNSNRR YPKTPSRVSE LSVGSPDRGS TVTKKITSK ALLVKNPQVI VPKLTTTPAR QVDLRNSDMA SRTLVKRSVS TTRRASLPLT NKAQVQELPR RPSSLFLDCI KSPDVSVNAP RIDKMLEFPL ASYEDPFHPI RRTSSNSAQG SSGSPQAEYS VMKDKCTIQI PDSKFDRMSS NDAWQGYEGE MVHVDREDIT DSSDQNTAG ASSRTSSDTRRRR FNMSSYK QRAEALEGLL EFSARLLQED RFDELGVLLK PFGPEKVSPP ETAIWLTKSI KENAPKQED</p> <p><b>Notes</b><br/>A recessive mutation in the SELF-PRUNING (SP) gene confers accelerated termination of stem units until the shoot is eventually terminated by two consecutive inflorescences<br/>Y2H screen with SP as bait, identified 5 SIPs (SP interacting proteins)<br/>SIP2 and SIP74 were ID'd as 14-3-3 proteins, the SIP74 is epsilon and SIP2 is a novel one<br/>SIP3 was SP-associated kinase (SPAK)<br/>SPAK is 60-65% similar in catalytic kinase domain with NIMA (never in mitosis A) group of kinases.<br/>Orthologues of SP bound to the SIPs ID'd above by Y2H<br/>SPAK forms homodimers in yeast<br/>By Y2H, 14-3-3 isoforms can interact with SPAK and SP and SIP4<br/>In vitro binding results consistent with Y2H results<br/>SPAK autophosphorylates a truncated SPAK lacking the kinase domain (SPAK exprd in bacteria)<br/>SPAK also phosphorylates the SIP4 protein and only phosphorylated SIP4 binds 14-3-3<br/><b>In Red</b> is the region required for homodimerisation of SPAK (deduced in Y2H assay)<br/><b>389 – 417</b> is required for SP and 14-3-3 to bind but this only when the c-terminal dimerization domain is present<br/><b>S406A</b> resulted in no interaction with SP or 14-3-3 using Y2H<br/>In paper this is <b>S274</b> = S276 in AF079103. A second putative 14-3-3 site but not rigorously tested<br/>PLLQPYVINTHLKLN GPRRNSLPAC LPDNDVKKTR FAISES – S274/6 = POSSIBLE SITE<br/>NSDMASRTLVKRSVSTTRRASLPLT NKAQVQELPRRPSLSF – S406 = 14-3-3 SITE BY Y2H</p> <p><b>References to 14-3-3 binding to SPAK</b><br/>Pnueli L, Gutfinger T, Hareven D, Ben-Naim O, Ron N, Adir N, Lifschitz E. Tomato SP-interacting proteins define a conserved signaling system that regulates shoot architecture and flowering. Plant Cell. 2001 Dec;13(12):2687-702.</p> |                                                             |
| <p><b>Triticum aestivum GAPN (non-phosphorylating glyceraldehyde-3-phosphate dehydrogenase (Swissprot = Q8LK61))</b></p> <pre> 1 MAGTGVFADV LDGEVYKYA DGEWRASAG KTVAINPPT RQTQYRVQAC TQEEVNKVM 61 AAKVAQKSWA RTPLWKRAEL LHKAAAILKE HKTPIAESLV KEIAKPAKDA VSEVVRSGDL 121 VSYTAEEGVR ILGEGKLLVS DSFPGNERNK YCLSSKVPLG VVLAIPPFNY PVLAVSKIG 181 PALIAGNSLV LKPPTQGA VA ALHMVHCFHL AGFPKGLISC VTGKGSEIGD FLTMHPGVNC 241 ISFTGGDTGI AISKKAGMVP LQMELEGGKDA CIVLEDADLD LVAANIVKGG FSYSGQRCTA 301 YKVVLI MEAV ADTVVEKVNA KLAKLKVGPP EDDSDITPVV TESSANFIEG LVMDAKEKGA 361 TFCQEYRREG NLIWPLLLDH VRPDMRIAW EFPFVLPVI RINVEEGIH HCNASNFGLQ 421 GCVFTRDINK AIMISDAMES GTVQINSAPA RGPDHFPFQG LKDSGIGSQG ITNSINMMTK 481 VKSTVINLPS PSYTMG </pre> <p>&gt;sp Q8LK61 GAPN_WHEAT NADP-dependent glyceraldehyde-3-phosphate dehydrogenase OS=Triticum aestivum GN=GAPN PE=1 SV=2</p>                                                                                                                                                                                                                                                                                                                                                                                                                                                                                                                                                                                                                                                                                                                                                                                                                                                                                                                                                                                                                                                                                                                                                                                                                                                                                                                                                                                                                                                                                                                                                                                                                                                                                                                                                                                                                                                                                                                                                                                                                                                                                                                                                                                                                                                                                                                                                                                                                                                                                                                                       | <p>SITE NOT CLEAR – NOT IN WEBLOGO</p>                      |

|                                                                                                                                                                                                                                                                                                                                                                                                                                                                                                                                                                                                                                                                                                                                                                                                                                                                                                                                                                                                                                                                                                                                                                                                                                                                                                                                                                                                                                                                                                                                                                                                                                                                                                                                                                                                                                                                                                                                                                                                                                                                                                                                                                                                                                                                                                                                                                                                                                                                                                                                                                                                                                                                                                                                                                                                                                                                                                                                                                                                                                                                        |                                                         |
|------------------------------------------------------------------------------------------------------------------------------------------------------------------------------------------------------------------------------------------------------------------------------------------------------------------------------------------------------------------------------------------------------------------------------------------------------------------------------------------------------------------------------------------------------------------------------------------------------------------------------------------------------------------------------------------------------------------------------------------------------------------------------------------------------------------------------------------------------------------------------------------------------------------------------------------------------------------------------------------------------------------------------------------------------------------------------------------------------------------------------------------------------------------------------------------------------------------------------------------------------------------------------------------------------------------------------------------------------------------------------------------------------------------------------------------------------------------------------------------------------------------------------------------------------------------------------------------------------------------------------------------------------------------------------------------------------------------------------------------------------------------------------------------------------------------------------------------------------------------------------------------------------------------------------------------------------------------------------------------------------------------------------------------------------------------------------------------------------------------------------------------------------------------------------------------------------------------------------------------------------------------------------------------------------------------------------------------------------------------------------------------------------------------------------------------------------------------------------------------------------------------------------------------------------------------------------------------------------------------------------------------------------------------------------------------------------------------------------------------------------------------------------------------------------------------------------------------------------------------------------------------------------------------------------------------------------------------------------------------------------------------------------------------------------------------------|---------------------------------------------------------|
| <p>MAGTGVFADVL DGEVYKYYADGEWRASASGKTVAIVNPTTRQTQYRVQACTQE EVNKVMD<br/>AAKVAQKSWARTPLWKRAELLHKAAILKEHKTP IAESLVKEIAKPAKDAVSEVVRSGDL<br/>VSYTAEQGVRI LGEGLKLLVSDSFPGNERNKYCLSSKVPGLGVLLAI PPFNYV PNLAVSKIG<br/>PALIAGNSLVLPKPTQ GAVAAALHMVHCFHLAGFPKGLISCVT GKGSEIGDFLTMH PGVNC<br/>ISFTGGDTG IAISKKAGMVLQME LGGKDACIVLE DADLDLVAANIVKGGFSYSGQRCTA<br/>VKVVLIMEAVADTVVEKVNKLAKLVGPPEDSDITPVVTESSANFIEGLVMDAREKGA<br/>TFCQEYRREGNLIWPLLLDHVRPDMRIAWE EPPFGVLPVIRINSVEEGIHHCNASNFGLQ<br/>GCVFTRDINKAIMISDAMESGTQVINSAPARGPDHFFQGLKDSGIGSQTNSNMMTK<br/>VKSTVINLPSPSYTMG</p> <p><b>Notes</b><br/>The ARAApSAPA phosphopeptide that competes for 14-3-3 binding increased the activity of specifically the phosphorylated GAPN enzyme almost 3-fold. Suggested to be 1 mol tetrameric GAPN to 2 mol dimeric 14-3-3. Mg<sup>2+</sup> disrupts the GAPN-14-3-3 interaction which is unusual, divalent cations normally stabilize it. A computer model putting S404 in one of the pockets implicates S447 as being in the other pocket although there is no experimental evidence for this.</p> <p><b>Plant non-phosphorylating glyceraldehyde-3-phosphate dehydrogenase (NP-Ga3PDHase) – sites not well defined</b></p> <p><b>References to 14-3-3 binding to NP-Ga3PDHase</b><br/>Bustos DM, Bustamante CA, Iglesias AA. Involvement of non-phosphorylating glyceraldehyde-3-phosphate dehydrogenase in response to oxidative stress. J Plant Physiol. 2008 Mar 13;165(4):456-61.<br/>Bustos DM, Iglesias AA. A model for the interaction between plant GAPN and 14-3-3zeta using protein-protein docking calculations, electrostatic potentials and kinetics. J Mol Graph Model. 2005 Jun;23(6):490-502.<br/>Bustos DM, Iglesias AA. Phosphorylated non-phosphorylating glyceraldehyde-3-phosphate dehydrogenase from heterotrophic cells of wheat interacts with 14-3-3 proteins. Plant Physiol. 2003 Dec;133(4):2081-8.</p>                                                                                                                                                                                                                                                                                                                                                                                                                                                                                                                                                                                                                                                                                                                                                                                                                                                                                                                                                                                                                                                                                                                                                 |                                                         |
| <p><b>Triticum aestivum WPK4 (Wheat protein kinase) (Swissprot = Q41592)</b></p> <pre> 1  MSAIKPPPPD RPPQARLPS PSSSSSAAAA AKQGGTGSRG LLMGRYELGR VLGKGTFAKV 61  YHARHVQTGE SVAIKVLDRE KAVRSGLVSH IKREIAVLR RHPNIVHLF EVMATKTKIY 121 FVMELLVRGG ELFSRVSKGR LKEDIARRYF QHLISAVGFC HTRGVFHRDL KPENLLVDEA 181 GNLVSDDFGL SAVAEFFQPE GLLHFCGTP AYVAPEVLAR RGYEGAKADI WSCGVILFVL 241 MAGYLPFHQD NLMAMYRKVY KGEFRCPRWF SKDLTSLIMR FLDTNPSTRI TLPEVMESRW 301 FKKGFRPVKF YIEDDQLYNV IDAENDMLDL GLPDPLPQPL PPPPPSPSQ QVDGDDSGSE 361 SDASVVSCPA TSSFEERHRL RGPLPRPAL NAFDIISFSR GFNL SGLFEE KGDEVRFISG 421 EPMPDIITKL EEIANVKSFA VRKDWVRVSL EGTREGVKGP LTICAEIFEL TP SLVVVEVK 481 KKAGDKEEYD DFCNKELKPG MQHLVHQMVP VPNTPTISEL AERP SR </pre> <p>&gt;tr Q41592 Q41592_WHEAT Wpk4 protein kinase OS=Triticum aestivum GN=wpk4 PE=2 SV=3</p> <p>MSAIKPPPPDRPPQARLPS PSSSSSAAAAAKQGGTGSRG LLMGRYELGRV LGKGTFAKV<br/>YHARHVQTGESVAIKVLDREKAVRSGLVSHIKREIAVLR RHPNIVHLFEVMATKTKIY<br/>FVMELLVRGGELFSRVSKGR LKEDIARRYFQHLISAVGFC HTRGVFHRDLKPENLLVDEA<br/>GNLVSDDFGLSAVAEFFQPEGLLHFCGTPAYVAPEVLARRGYEGAKADIWSCGVILFVL<br/>MAGYLPFHQDNLMAMYRKVYKGEFRCPRWFSKDLTSLIMRFLDTNPSTRI TLPEVMESRW<br/>FKKGFRPVKFYIEDDQLYNVIDAENDMLDLGLPDPLPQPLPPPPSPSQQVDGDDSGSE<br/>SDASVVSCPATSSFEERHRLRGPLPRPASLNAFDIISFSRGFNL SGLFEEKGDEVRFISG<br/>EPMPDIITKLEEEIANVKSFAVRKDWVRVSL EGTREGVKGPLTICAEIFELTPSLVVVEVK<br/>KKAGDKEEYDDFCNKELKPGMQHLVHQMVPVPNTPTISELAERP SR</p> <p><b>Notes</b><br/>Interacted with 14-3-3 by Y2H<br/>T204 in paper but T205 in this sequence? Is an autophosphorylation site in the activation loop<br/>T204A reduced binding to 14-3-3 by 25% indicating that binding was dependent on the kinase activity<br/>K75D mutant shows no kinase activity and this mutant had an 80% reduction in 14-3-3 binding by Y2H reporter assay<br/>Kinase dead can't pull down 14-3-3 (in vitro bacterially expressed proteins)<br/>S388A and S418A single mutants show mild reduction in 14-3-3 binding by quantitative Y2H<br/>S388A/S418A double shows only ~25% binding of WT and in WT, these sites are probably autophosphorylation sites.<br/>1 to 314 fragment lacking putative residues showed only 10% binding<br/>Overlay assay was done on C-terminal fragment containing the putative binding sites and it was found that the double mutant showed only a modest reduction suggesting additional 14-3-3 binding site in C-terminus<br/>S388 - PATSSFEERHRLRGPLPRPALNAFDIISFSRGFNL SGLFEE<br/>S418 - SRGFNL SGLFEEKGDEVRFISGEPMPDIITKLEEEIANVKSFA</p> <p><b>References to 14-3-3 binding to WPK4</b><br/>Nozawa A, Sawada Y, Akiyama T, Koizumi N, Sano H. Variable interactions between sucrose non-fermented 1-related protein kinases and regulatory proteins in higher plants. Biosci Biotechnol Biochem. 2003 Dec;67(12):2533-40.<br/>Ikeda Y, Koizumi N, Kusano T, Sano H. Specific binding of a 14-3-3 protein to autophosphorylated WPK4, an SNF1-related wheat protein kinase, and to WPK4-phosphorylated nitrate reductase. J Biol Chem. 2000 Oct 13;275(41):31695-700.</p> | <p>SITE NOT CLEAR – NOT IN WEBLOGO</p>                  |
| <p><b>Zea mays HOX1a</b> Maize homeodomain protein with PHD and leucine zipper (Arabidopsis relative HAT3.1) (Swissprot = P46605)</p> <pre> 1  MEKNIAHCPV EGNGEIENGA SSSQNPESE HSVLLSTSQT MPNNLGIRKN YKRAANRGKK 61  GSQGLTGQAY TLMSSNSDVR VLRSTSSSKT TSTEHVQAPV QPAAKRRKMS RASNKSTDE 121 FSQIRKRVRY ILNRMNYEQS LIEAYASEGW KNQSLDKIRP EKELERAKSE ILRCKLRIRE 181 VFRNIDSLLS K GKIDETLFD SEGEISCEDI FCSTCGSND A TLGNDIILCD GACDRGFHQN 241 CLNPLRLTED IPMGDEGWLC PACDCIDCI DLINELHGSN ISIEDSWEKV FPDAAAMAND 301 SKQDDAFDLP SDDSDNDNFD PNMPEEHVVG KDEESSEDE DGGSDSDSD FLTCSDDSEP 361 LIDKKVDDL R LPSEDSDDD YDPAGPDSK DVEKKSSSDE SDFTSDSDDF CKEISKSGHD </pre>                                                                                                                                                                                                                                                                                                                                                                                                                                                                                                                                                                                                                                                                                                                                                                                                                                                                                                                                                                                                                                                                                                                                                                                                                                                                                                                                                                                                                                                                                                                                                                                                                                                                                                                                                                                                                                                                                                                                                                                                                                                                                                                                                                                                                                                                                                                                                                                                                | <p>Sites of 14-3-3 binding not defined. NO WEBLOGO.</p> |

|                                                                                                                                                                                                                                                                                                                                                                                                                                                                                                                                                                                                                                                                                                                                                                                                                                                                                                                                                                                                                                                                                                                                                                                                                                                                                                                                                                                                                                                                                                                                                                                                                                                                                                                                                                                                                                                                                                                                                                                                                                                                                                                                                                                                                                                                                                                                                                                                      |                                                                                           |
|------------------------------------------------------------------------------------------------------------------------------------------------------------------------------------------------------------------------------------------------------------------------------------------------------------------------------------------------------------------------------------------------------------------------------------------------------------------------------------------------------------------------------------------------------------------------------------------------------------------------------------------------------------------------------------------------------------------------------------------------------------------------------------------------------------------------------------------------------------------------------------------------------------------------------------------------------------------------------------------------------------------------------------------------------------------------------------------------------------------------------------------------------------------------------------------------------------------------------------------------------------------------------------------------------------------------------------------------------------------------------------------------------------------------------------------------------------------------------------------------------------------------------------------------------------------------------------------------------------------------------------------------------------------------------------------------------------------------------------------------------------------------------------------------------------------------------------------------------------------------------------------------------------------------------------------------------------------------------------------------------------------------------------------------------------------------------------------------------------------------------------------------------------------------------------------------------------------------------------------------------------------------------------------------------------------------------------------------------------------------------------------------------|-------------------------------------------------------------------------------------------|
| <p>421 EVSSPLLPA KVGDMEKITA QAKTSSADD PMETEIDQGV VLPDSRRRQA ERLDYKKLYD<br/> 481 EAYGEASSDS SDDEEWSGKN TPIIKSNEEG EANSAPAGKGS RVVHHNDEL TQSTKKSLSHS<br/> 541 IHGSDVEKPG DLTSNGSNST ARKGHFGPVI NQKLHEHFKT QYPSPRSVKE SLAEELGLTF<br/> 601 RQVNWKFETR RHSARVASSR KGISLDKHSP QNTNSQVTAS MEPKEPEGTV VEESNVCLNG<br/> 661 GTTISKEAVS SKVGSRTPGS DVGSKVDSA EDQNPDPDLA EKARQKAIQQ ELRKKKMG<br/> &gt;gi 1170434 sp P46605.1 HOX1A MAIZE RecName: Full=Homeobox protein HOX1A<br/> MEKNIAHCPVEGNIEGASSSQNPESLEHSLVLLSTSQTMPNLLGIRKKNYKRAANRGKKSQGLTGOAY<br/> TLMSSNSDVRVLRSTSSSKTSTEHVQAPVQPAAKRRKMSRASNKSSSTDEFSSQIRKRVRYILNRMNYEQS<br/> LIEAYASEGWKNQSLDKIRPEKELERAKSEILRCKLRIREVFRNIDSLLSKGIKIDETLFDSEGEISCEDI<br/> FCSTCGSNDATLGNIDIILCDGACDRGFHQCLNPLRTEIPMGDEGWLCPACDCKIDICIDLINELHGSN<br/> ISIEDSWKVFPPDAAMANDSKQDDAFLPSDDSDNDNDFPNMPEEHVVKDEESSEDEDDGSDSDSDSD<br/> FLTCSDDSEPLIDKKVDDLRLPSESEDDDDYDPAGPDSKDVKKSSDESDFTSDDDFCKEISKSGHD<br/> EVSSPLLPAKVGDMEKITAQAKTSSADDPMETEIDQGVVLPDSRRRQAERLDYKKLYDEAYGEASSDS<br/> SDDEEWSGKNTPIKSNEEGEANSAPAGKGSRVVHHNDEL TQSTKKSLSHS IHGSDVEKPGDLTSNGSNST<br/> ARKGHFGPVIHQKLHEHFKTQYPSPRSVKESLAEELGLTFRQVNWKFETRHSARVASSRKGISLDKHSP<br/> QNTNSQVTASMEPKPEGTVVEESNVCLNGGTTISKEAVS SKVGSRTPGSDVGSKVDSAEDQNPDPDLA<br/> EKARQKAIQQELRKKKMG</p> <p><b>Notes</b><br/> Several plant homeodomain proteins have a conserved architecture, with a leucine zipper followed by a PHD domain. The leucine zipper region of was found to bind to 14-3-3 in a yeast two-hybrid assay, but the precise site is not defined. It is suggested that a leucine zipper-like segment in helix alpha 4 of 14-3-3 interacts with the leucine zipper of the homeodomain proteins.</p> <p><b>References to 14-3-3 binding to Plant homeodomain proteins with PHD and leucine zipper</b><br/> Halbach T, Scheer N, Werr W. Transcriptional activation by the PHD finger is inhibited through an adjacent leucine zipper that binds 14-3-3 proteins. <i>Nucleic Acids Res.</i> 2000 Sep 15;28(18):3542-50.</p>                                                                                                                                                                                                                                                                                                                                                                                 |                                                                                           |
| <p><b>Zea mays MPK6 A MAP kinase (Uniprot Q6TAR9)</b><br/> 1 MQHDQKKKAP SEMDFTEYEG EGSRYKIEEV IGKSGYGVVC SAVDTHTEGK VAIKKINDIF<br/> 61 EHVSDATRIL REIKLLRLLR HPDIVEIKHI LLPSPRRFR DIYVVFELME SDLHQVIKAN<br/> 121 DDLTPEHYQF FLYQLLRGLK YIHTANVFHR DLKPKNILAN ADCCLKICDF GLARVAFNDT<br/> 181 PTAIFWTDYV ATRWYRAPEL CGSFFSKYTP AIDIWSIGCI FAELLTGKPL FPGKNVVHQL<br/> 241 DIIITDLLGTP SPEAISRI RN EKARRYLSM RRRKPIPTQ KFPNADPLAL CLLERMLAFE<br/> 301 PKDRPSAEEA LADPYFKNIA SVDREPSAQA VTKLEFEFER RRVTKEDIRE LIYREILEYH<br/> 361 PKMLREFLEG TESSGFMYPS AVDHFKKQFA YLEEHYAKGS TGTPPERQHN SLPRPSVVYS<br/> 421 DNRSQTTANI TEDLSKCLR ENTQKTHPYS ASVASKFPPH VPQGDVARPG KAVGSVMQYS<br/> 481 PCPAPAAERY EQRRIARHPA VAPNNIPSGS SYPRRSQTCK SETGDAESHM DANQARQPKP<br/> 541 YAANKLPATV DSRGGHW<br/> &gt;tr Q6TAR9 Q6TAR9 MAIZE Putative uncharacterized protein OS=Zea mays PE=2 SV=1<br/> MQHDQKKKAPSEMDFTEYEGEGSRKIEEVIGKSGYGVVCSAVDTHTEGKVAIKKINDIF<br/> EHVSDATRILREIKLLRLLRHPDIVEIKHILLPSPRRFRDIYVVFELMESDLHQVIKAN<br/> DDLTPHEHYQFFLYQLLRGLKYIHTANVFHRDLKPKNILANADCCLKICDFGLARVAFNDT<br/> PTAIFWTDYVATRWRAPPELCCGSFFSKYTPAIDIWSIGCIFAEELLTGKPLFPGKNVVHQL<br/> DIIITDLLGTPSPEAISRI NEKARRYLSMRRRKKPIPTQKFPNADPLALCLLERMLAFE<br/> PKDRPSAEEALADPYFKNIASVDREPSAQA VTKLEFEFERRRVTKEDIRELIYREILEYH<br/> PKMLREFLEGTESSGFMYPSAVDHFKKQFAYLEEHYAKGSTGTPPERQHNSLPRPSVVYS<br/> DNRSQTTANITEDLSKCLRNTQKTHPYSASVASKFPPHVPQGDVARPGKAVGSVMQYS<br/> PCPAPAAERYEQRRIARHPAVAPNNIPSGSSYPRRSQTCKSETGDAESHMDANQARQPKP<br/> YAANKLPATVDSRGGHW</p> <p><b>Notes; Binding sites not identified but region identified</b><br/> In vitro data:<br/> Bacterially expressed full length protein bound plant 14-3-3 GF14-6 in vitro in the overlay assay (radiolabelled 14-3-3s) but not the K56E mutant and is phosphorylation dependent.<br/> 14-3-3 beads bound ZmMPK6 from a bacterial lysate<br/> 14-3-3 binding does not affect the catalytic activity of ZmMPK6 in a kinase assay using MBP as substrate<br/> S411A mutation of a mode II 14-3-3 binding site was still able to bind 14-3-3.<br/> Deletion constructs were expressed and 14-3-3 binding was found to be in 337 - 467</p> <p><b>References to 14-3-3 binding to ZmMPK6</b><br/> Lalle M, Visconti S, Marra M, Camoni L, Velasco R, Aducci P. ZmMPK6, a novel maize MAP kinase that interacts with 14-3-3 proteins. <i>Plant Mol Biol.</i> 2005 Nov;59(5):713-22.</p> | <p>Sites of 14-3-3 binding not defined, though binding region identified. NO WEBLOGO.</p> |

|                                                                                                                                                                                                                                                                                                                                                                                                                                                                                                                                                                                                                                                                                                                                                                                                                                                                                                                                                                                                                                                                                                                                                                                                                                                                                  |                                                                          |
|----------------------------------------------------------------------------------------------------------------------------------------------------------------------------------------------------------------------------------------------------------------------------------------------------------------------------------------------------------------------------------------------------------------------------------------------------------------------------------------------------------------------------------------------------------------------------------------------------------------------------------------------------------------------------------------------------------------------------------------------------------------------------------------------------------------------------------------------------------------------------------------------------------------------------------------------------------------------------------------------------------------------------------------------------------------------------------------------------------------------------------------------------------------------------------------------------------------------------------------------------------------------------------|--------------------------------------------------------------------------|
| <p><b>Proteins from bacteria and viruses that interact with 14-3-3 inside eukaryotic host cells</b><br/> <b>Agrobacterium rhizogenes RolB (Swissprot= P49408)</b><br/> 1 MAEFDLALF SSLKVGDVSS SDELKKHIQS ASKERTPLTE PEGEQSMDID EEGGRQDPGI<br/> 61 LYLYVDCPTM MRCFYGGSLP YNSRHGALIT NLPYQKDVSLGEVCRGLRQ ASGFFGYEDV<br/> 121 IRSAYFAALS VPGYFVKLDG QMELTSTKKG SLTFDLYASN QLRLPEPALV RHGECKFGME<br/> &gt;gi 1350824 sp P49408.1 ROC2_AGRH RecName: Full=Cytokinin-beta-glucosidase; AltName: Full=ROL C protein<br/> MAEFDLALFSSLKVGDVSSDELKKHIQSASKERTPLTEPEGEQSMDIDEEGGRQDPGILYLYVDCPTM<br/> MRCFYGGSLPYNSRHGALITNLPYQKDVSLGEVCRGLRQASGFFGYEDVIRSAYFAALSVPYFVKLDG<br/> QMELTSTKKGSLTFDLYASNQLRLPEPALVRHGECKFGME</p> <p><b>Notes</b><br/> Soil-borne Gram-negative bacterium and causal agent of hairy root disease in many dicotyledonous plants. rolB gene derived from pRil724 in <i>A. rhizogenes</i> MAFF301724, named 1724rolB. Hydrolyzes cytokinin glucosides thus liberating free cytokinins. Contributes to the root inducing activity. Interacts directly with 14-3-3 omega inside <i>Arabidopsis</i> cells.</p> <p><b>References to 14-3-3 binding to RolB</b><br/> Moriuchi H, Okamoto C, Nishihama R, Yamashita I, Machida Y, Tanaka N. Nuclear localization and</p> | <p>INTERACTION MIGHT BE PHOSPHORYLATION-INDEPENDENT – NOT IN WEBLOGO</p> |
|----------------------------------------------------------------------------------------------------------------------------------------------------------------------------------------------------------------------------------------------------------------------------------------------------------------------------------------------------------------------------------------------------------------------------------------------------------------------------------------------------------------------------------------------------------------------------------------------------------------------------------------------------------------------------------------------------------------------------------------------------------------------------------------------------------------------------------------------------------------------------------------------------------------------------------------------------------------------------------------------------------------------------------------------------------------------------------------------------------------------------------------------------------------------------------------------------------------------------------------------------------------------------------|--------------------------------------------------------------------------|

|                                                                                                                                                                                                                                                                                                                                                                                                                                                                                                                                                                                                                                                                                                                                                                                                                                                                                                                                                                                                                                                                                                                                                                                                                                                                                                                                                                                                                                                                                                                                                                                                                                                                                                                                                                                                                                                                                                                                                                                                                                                                                                                                                                                                                                                                                                                                                                                                                                                                                                                                                                                                                                                                                                                                                                                                                                                                                                                                                                                                                                   |                                                                                                     |
|-----------------------------------------------------------------------------------------------------------------------------------------------------------------------------------------------------------------------------------------------------------------------------------------------------------------------------------------------------------------------------------------------------------------------------------------------------------------------------------------------------------------------------------------------------------------------------------------------------------------------------------------------------------------------------------------------------------------------------------------------------------------------------------------------------------------------------------------------------------------------------------------------------------------------------------------------------------------------------------------------------------------------------------------------------------------------------------------------------------------------------------------------------------------------------------------------------------------------------------------------------------------------------------------------------------------------------------------------------------------------------------------------------------------------------------------------------------------------------------------------------------------------------------------------------------------------------------------------------------------------------------------------------------------------------------------------------------------------------------------------------------------------------------------------------------------------------------------------------------------------------------------------------------------------------------------------------------------------------------------------------------------------------------------------------------------------------------------------------------------------------------------------------------------------------------------------------------------------------------------------------------------------------------------------------------------------------------------------------------------------------------------------------------------------------------------------------------------------------------------------------------------------------------------------------------------------------------------------------------------------------------------------------------------------------------------------------------------------------------------------------------------------------------------------------------------------------------------------------------------------------------------------------------------------------------------------------------------------------------------------------------------------------------|-----------------------------------------------------------------------------------------------------|
| <p>interaction of RolB with plant 14-3-3 proteins correlates with induction of adventitious roots by the oncogene rolB. Plant J. 2004 Apr;38(2):260-75.</p>                                                                                                                                                                                                                                                                                                                                                                                                                                                                                                                                                                                                                                                                                                                                                                                                                                                                                                                                                                                                                                                                                                                                                                                                                                                                                                                                                                                                                                                                                                                                                                                                                                                                                                                                                                                                                                                                                                                                                                                                                                                                                                                                                                                                                                                                                                                                                                                                                                                                                                                                                                                                                                                                                                                                                                                                                                                                       |                                                                                                     |
| <p><b>Pseudomonas aeruginosa ExoS</b> exoenzyme S of <i>Pseudomonas aeruginosa</i> (NC_002516.2)</p> <pre> 1 MHIQSLQQSP SFAVELHQAA SGRLGQIEAR QVATPSEAQQ LAQRQDAPKG EGLLARLGAA 61 LVRPFVAIMD WLGKLLGSHA RTGQPFSQDA QPAVMSSAVV FKQMVLLQAL PMTLKGLDKA 121 SELATLTPEG LAREHSRLAS GDGALRSLST ALAGIRAGSQ VEESRIQAGR LLEERSIGGIA 181 LQQWGTGGA ASQLVLDASP ELRREITDQL HQVMSEVALL RQAVESEVSR VSADKALADG 241 LVKRFGADAE KYLGRQPPGI HSDAEVMALG LYTGIIHYADL NRALRQGGEL DAGQKLIDQG 301 MSAAFEKSGQ AEQVVKTFRG TRGGDAFNAV EEGKVGHDDG YLSTSLNPGV ARSFGQGTIS 361 TVFGRSGIDV SGISNYKNEK EILYNKETDM RVLLSASDEQ GVTRRVLEEA ALGEQSGHSQ 421 GLLDALLDAS KPERSGEVQE QDVRLMRGL DLA </pre> <p>&gt;gi 450297 gb AAA66491.1  exoenzyme S [Pseudomonas aeruginosa]</p> <pre> MHIQSLQQSPSFAVELHQAAASGRLGQIEARQVATPSEAQQLAQRQDAPKGEGLLARLGAAALVRPFVAIMD WLGKLLGSHARTGQPFSQDAQPAVMSSAVVFKQMVLLQALPMTLKGLDKASELATLTPEGLAREHSRLAS GDGALRSLSTALAGIRAGSQVEESRIQAGRLLEERSIGGIALQQWGTGGAASQLVLDASPELREITDQL HQVMSEVALLRQAVESEVSRVSADKALADGLVKRFGADAEKYLGRQPPGIHSDAEVMALGLYTGIIHYADL NRALRQGGELDAGQKLIDQMSAAFEKSGQAEQVVKTFRGTRGGDAFNAVEEGKVGHDDGYLSTSLNPGV ARSFGQGTISTVFGRSGIDVSGISNYKNEKEILYNKETDMRVLLSASDEQGVTRRVLEEAALGEQSGHSQ GLLDALDLASKPERSGEVQEQDVRLMRGLDLA </pre> <p><b>Notes</b><br/> The <u>phosphorylation-independent</u> interaction between ExoS and 14-3-3 occurs in a completely novel reversed fashion and is dependent on hydrophobic interactions (residues Leu422, Leu423, Leu426 and Leu428) rather than being electrostatically driven, as occurs with mode I-III consensus peptides. Exoenzyme-S, ADP-ribosylation.</p> <p><b>References to 14-3-3 binding to ExoS</b><br/> Fu H, Coburn J, Collier RJ. The eukaryotic host factor that activates exoenzyme S of <i>Pseudomonas aeruginosa</i> is a member of the 14-3-3 protein family. Proc Natl Acad Sci U S A. 1993 Mar 15;90(6):2320-4.<br/> Ottmann C, Yasmin L, Weyand M, Veessenmeyer JL, Diaz MH, Palmer RH, Francis MS, Hauser AR, Wittinghofer A, Hallberg B. Phosphorylation-independent interaction between 14-3-3 and exoenzyme S: from structure to pathogenesis. EMBO J. 2007 Feb 7;26(3):902-13.<br/> Yasmin L, Jansson AL, Panahandeh T, Palmer RH, Francis MS, Hallberg B. Delineation of exoenzyme S residues that mediate the interaction with 14-3-3 and its biological activity. FEBS J. 2006 Feb;273(3):638-46.<br/> Henriksson ML, Francis MS, Peden A, Aili M, Stefansson K, Palmer R, Aitken A, Hallberg B. A nonphosphorylated 14-3-3 binding motif on exoenzyme S that is functional in vivo. Eur J Biochem. 2002 Oct;269(20):4921-9.<br/> Zhang L, Wang H, Masters SC, Wang B, Barbieri JT, Fu H. Residues of 14-3-3 zeta required for activation of exoenzyme S of <i>Pseudomonas aeruginosa</i>. Biochemistry. 1999 Sep 14;38(37):12159-64.<br/> Masters SC, Pederson KJ, Zhang L, Barbieri JT, Fu H. Interaction of 14-3-3 with a nonphosphorylated protein ligand, exoenzyme S of <i>Pseudomonas aeruginosa</i>. Biochemistry. 1999 Apr 20;38(16):5216-21.</p> | <p>NOT IN WEBLOGO AS THIS IS A PHOSPHORYLATION-INDEPENDENT INTERACTION THAT CANNOT BE 'CENTRED'</p> |
| <p><b>Polyomavirus Middle T antigen (Swissprot = P03076)</b></p> <pre> 1 MDRVLSRADK ERLLELLKLP RQLWGFGRM QQAYKQSSL LHPDKGSHA LMQELNSLWG 61 TFKTEVYNLR MNLGGTGFQV RRLHADGWNL STKDTFGDRY YQRFRCMPLT CLVNVKYSSC 121 SCILCLLRKQ HRELKDKCDA RCLVLGECFC LECYMQWFGT PTRDVLNLYA DFIASMPIDW 181 LDLDVHSVYN PKRRSEELRR AATVHYTMTT GHSAMEASTS QNGMISSES GTPATSRRLR 241 LPSLLSNPTY SVMRSHS YPP TRVLQIHPH ILLEEDILV LLSFMTAYPR TPPELLYPES 301 DQDQLEPLEE EEEYMPMED LYLDILPEEQ VPQLIPPII PRAGLSPWEG LILRDLQRAH 361 FDPILDASQR MRATHRAALR AHSMQRHLR LGRTLLLVTF LAALLGICLM LFILIKRSRH 421 F </pre> <p><b>Notes</b><br/> RSH(pS)YPPPT – phosphorylation identified by solid phase Edman sequencing fater protein extracted from NIH 3T3 cells.</p> <p><b>References to 14-3-3 binding to polyomavirus middle T antigen</b><br/> Culleré X, Rose P, Thathamangalam U, Chatterjee A, Mullane KP, Pallas DC, Benjamin TL, Roberts TM, Schaffhausen BS. Serine 257 phosphorylation regulates association of polyomavirus middle T antigen with 14-3-3 proteins. J Virol. 1998 Jan;72(1):558-63.</p>                                                                                                                                                                                                                                                                                                                                                                                                                                                                                                                                                                                                                                                                                                                                                                                                                                                                                                                                                                                                                                                                                                                                                                                                                                                                                                                                                                                                                                                                                                                                                                                                                                                                                                                                                                                                                                                                                                                                                    |                                                                                                     |

**Supplementary Table 2. Reported 14-3-3-binding sites flanked by 20 amino acids on either side, based on the data collated in Supplementary Table 1. A. Mammalian proteins; B. Non-mammalian animal proteins; C. Fungal proteins; D. Plant proteins; E. Bacterial and viral proteins that interact with 14-3-3s inside eukaryotic host cells.**

Where two sites have been identified for a given protein, the sequence around the second site is in pink type. Where sites are near the N-terminus or C-terminus of a protein, gaps (-) were introduced because the Weblogo programme requires all aligned sequences to be the same length.

**Caveat emptor:** The data collected here is likely to include assignments that are incorrect, due to inaccuracies in the original assignments, or our interpretation of authors' intentions for which we apologise. To aid future improvements in the dataset, we ask authors to report any corrections to [c.mackintosh@dundee.ac.uk](mailto:c.mackintosh@dundee.ac.uk).

| Mammalian proteins reported to interact directly with 14-3-3                                                                   | Sequences for WEBLOGO analysis                                                         |
|--------------------------------------------------------------------------------------------------------------------------------|----------------------------------------------------------------------------------------|
| <b>Human AANAT</b> Serotonin N-acetyltransferase; arylalkylamine N-acetyltransferase. (Swissprot = Q16613)                     | PEAPRLPPGIPESPSQCRRHSLPASEFRCLTPEDAVSAFEI<br>SLTFMELHCSLRGHPFLRRNIGC-----              |
| <b>Human Abl1</b> Abelson murine leukemia viral oncogene homolog 1 (Tyrosine kinase) (Swissprot = P00519)                      | RSCSASCVPHGAKDTEWRSVTLPRDLQSTGRQFDSSTFGGH                                              |
| <b>Human ADAM22</b> Disintegrin and metalloproteinase domain-containing protein 22 (Swissprot = Q9P0K1)                        | RIPDTKHISDICENGRPRSNWQGNLGGNKKKIRGKRFRPR<br>GNLGGNKKKIRGKRFRPRSNITETLSPAKSPSSSTGSIASS  |
| <b>Human AKAP13</b> AKAP-Lbc, guanine nucleotide exchange factor (GEF) for RhoA (Swissprot = Q12802)                           | PANCSVLRSMSRSLSPFRRHSLWPGKNAASDAEMNHRSSMR                                              |
| <b>Human AKT1S1 (PRAS40)</b> (Swissprot = Q96B36)                                                                              | GPPTCSVPPASALPTQQYAKSLPVSVPVWGFKEKRTEARSS<br>VLREABDTQVFGDLPRRLNLSDFQKLKRRY-----       |
| <b>Human ARaf1 (ARAF)</b> (Swissprot = P10398)                                                                                 | PEHFFFPAPANAPLQRIRSTSTPNVHMVSTTAPMDSNLIQL<br>QILATIELLQRLPKIERSALEPSLHRTQADELPACILLSAA |
| <b>Human ARHGEF2</b> GEF-H1 microtubule-localized Rho exchange factor (Swissprot = Q92974)                                     | TEPLPAEAPWARRPVDPRRRSLPAGDALYLSFNPPQPSRGT                                              |
| <b>Human ATXN-1</b> Ataxin-1. PolyQ mutant in spinocerebellar ataxia 1. (Swissprot = P54253)                                   | APFLTKIEPSKPAATRKRRLWLAPESRKLEKSEDEPPLTLPK                                             |
| <b>Human BAD</b> (Swissprot = Q92934)                                                                                          | PTSSSHHGAGAVEIRSRHSLYPAGTEDDEGMGEEPSPFRG<br>GTEDDEGMGEEPSPFRGRSLAPPNLWAAQRYGRELRRMSD   |
| <b>Human BAIP2 (also known as IRSp53)</b> Brain-specific angiogenesis inhibitor 1-associated protein 2 (Swissprot = Q9UQB8)    | QPKLSLPPQSQSKLSDSYSNLLPVRKSVTPKNSYATTENK<br>LPVRKSVTPKNSYATTENKLPRSSSMAAGLERNGMRVK     |
| <b>Human BCL2L11</b> = Bcl-2-like protein 11 = BimEL =EL isoform of Bim (Swissprot = O43521)                                   | PASPGPFATRSPFLIFMRRSLLSRSSSGYFSFDTRSPAP                                                |
| <b>Human BRAf1 (BRAF)</b> (Swissprot = P15056)                                                                                 | FFRPADEDHRNQFGQRDRSSAPNVHINTIEPVNIDDLIRD<br>QILASIELLARSPLKIHRSALEPSLNRAGFQTEDFSLYACA  |
| <b>Human Cabin1</b> (Calcineurin-binding protein cabin-1) (Q9Y6J0)                                                             | SGSAQPPEGHPGKPEPSRAKSRPLNMPKLVIPSAATKFPF                                               |
| <b>Human CBY1</b> Chibby = antagonist of $\beta$ -catenin (ARPP-binding protein) (Swissprot = Q9Y3M2)                          | -MPFFGNTFSPKKTPPRKSALSLSLHSLDRSTREVELGLEI                                              |
| <b>Human CD74</b> Major histocompatibility complex, class II invariant chain (Swissprot = P04233-1 for canonical long isoform) | -----MHRRRSLCREDDQKPVMDQDRDLISNNE                                                      |
| <b>Human Cdc25A</b> M-phase inducer phosphatase 1 (Swissprot = P30304)                                                         | GCLHSHGLQEGKDLFTQRQNSAPARMLSSNERDSSSEPGNFI                                             |
| <b>Human Cdc25B</b> M-phase inducer phosphatase 2 (Swissprot = P30305)                                                         | KEEEKDLVMYSKQRLFRSPMPCSVIRPILKRLERPQDRD                                                |
| <b>Human Cdc25C</b> M-phase inducer phosphatase 3 (Swissprot = P30307)                                                         | EFSLKDQEAQVSRSGLYRSLMPENLNRPRKQVEKFKDNT                                                |
| <b>Human CDC2L2=CDK11p110</b> (Cyclin-dependant Kinase 11) (Swissprot = P21127)                                                | RKEKVHHRKDEKRKEKRRHSLHSAEGGKHARVKEKEREHER                                              |
| <b>Human CDKN1B (p27Kip1)</b> Cyclin-dependent kinase inhibitor 1B (Swissprot = P46527)                                        | PSDSQTGLAEQCAGIRKRPATDDSTQNKRANRTEENVSDG<br>SPNAGSVEQTPKKPGLRRRC-----                  |
| <b>Human CENPJ</b> (Centromere protein J) CPAP (Centrosomal Protein 4.1-Associated Protein) (Swissprot = Q9HC77)               | VEKYKKNYLPQGNPPRRSKLAPPRDLGNLDKGAASPREP                                                |
| <b>Human CFL1</b> Cofilin 1 (Swissprot = P23528)                                                                               | -----MAGSGVAVSDGVIKVFNDMKVRKS                                                          |

|                                                                                                                           |                                             |
|---------------------------------------------------------------------------------------------------------------------------|---------------------------------------------|
| <b>Human CRTC2</b> (TORC2) (Swissprot = Q53ET0)                                                                           | GVAVSDGVIKVFNDMKVRKSTPEEVKRRKKAVLFLCLEDK    |
| <b>Human CSF2RB</b> (GM-CSF/IL-3/IL-5 cytokine receptor common beta subunit) (Swissprot = P32927)                         | NFPAEKQQLFRLPSALNRTSDSALHTSVMNPSQDTPYPGF    |
| <b>Human CTNBN1</b> Catenin beta-1 (Beta-catenin) (Swissprot = P35222)                                                    | EKQASSFDNFGPYLGPPhSRSLPDILGQPEFPQEGGSQKSP   |
| <b>Human Cx43</b> Connexin43 (Swissprot = P17302)                                                                         | AIPLVQLLVRAHQDTQRRTSMGGTQQQFVEGVRMEEIVEG    |
| <b>Human DAB2IP</b> Disabled homolog 2-interacting protein; AIP1 ASK1-interacting protein 1 Ras-GAP (Swissprot = Q5VWQ8)  | LQPLAIVDQRFSSRRASSRASSRPRPDDLEI-----        |
| <b>Human DDIT4</b> DNA-damage-inducible transcript 4 protein (Redd1) (Swissprot = Q9NX09)                                 | KDLFFVTRSSGVQPSPARSSSYSEANEPLDQMANGGKSLSM   |
| <b>Human DDIT4L</b> DNA-damage-inducible transcript 4-like protein (Redd2) (Swissprot = Q96D03)                           | LLMPSQLVSVQVQKELLRLAYS EPCGLRGALLDVCVEQGKSC |
| <b>Human FAM82A2 (PTPIP51)</b> (Tyr Pase-interacting protein 51) (Swissprot = Q96TC7)                                     | VLVPEKLTQRIAQDVLRLSS EPCGLRGCMHVNLIEINV     |
| <b>Human FGFR2</b> Fibroblast growth factor receptor 2 (Swissprot = P21802)                                               | FLCLLSQRWKRTRQRHGRSQSLPNSLDYQTSDPGRHVMLL    |
| <b>Human FOXO1</b> Forkhead box protein O1 transcription factor (FKHR) (FOXO1A) (Swissprot = Q12778)                      | TLTTNEEYLDLSQPLEQYSPSYDTRSSCSGDDSVFSPDF     |
| <b>Human FOXO3</b> Forkhead box protein O3 (FKHRL1) (FOXO3A) (Swissprot = O43524)                                         | APQVVEIDPDFEPLPRPRSCWPLPRPEFSQNSATSSPAP     |
| <b>Human FOXO4</b> Forkhead box protein O4 (AFX, AFX1, MLLT7) (Swissprot = P98177)                                        | WWMNLNPEGGKSGKSPRRRAAMDNNSKFAKRSRAAKKAS     |
| <b>Human GAB2</b> GRB2-associated binding protein 2 (Swissprot = Q9UQC2)                                                  | SPLEVELDPEFEPQSRPRSCWPLQRPELQASPAKPSGETA    |
| <b>Human GEM</b> Kir/Gem, with Rad, Rem and Rem2, member of the RGK small GTP-binding protein family (Swissprot = P55040) | WIIINPDGGKSGKAPRRRAVMDNSNKYTKSRGRAAKKAA     |
| <b>Human GFAP</b> Glial fibrillary acidic protein (Swissprot = P14136)                                                    | AAAIIDLDPDFEPQSRPRSCWPLPRPEIANQPSEFPEVEF    |
| <b>Human Gli1</b> GLI family zinc finger 1 (Glioma-associated oncogene) transcription factor (Swissprot = P08151)         | WWMNLNPEGGKSGKAPRRRAAMDSSKLLRGRSKAPKKKPS    |
| <b>Human Gli2</b> GLI family zinc finger 2 (Tax helper protein) transcription factor (Swissprot = P10070)                 | QEYLYLHQCSIRRAENARSAFSQGRTRASFLMRSDTAVQKL   |
| <b>Human Gli3</b> GLI family zinc finger 3 transcription factor (Swissprot = P10071)                                      | QRPPISENSRSVAATI PRNL PAMDNSRLHRASSCTEY     |
| <b>Human GPIBA</b> Glycocalicin Platelet glycoprotein Ib alpha chain (GPIb alpha) (Swissprot = P07359)                    | LNNVTMRQGTVMQPPQQRWIPADGRHLMVQKEPHQYSHR     |
| <b>Human GRIN2C</b> (NMDAR2C) NMDA receptor subunit 2C (Swissprot = Q14957)                                               | FWGKIVAKNNKNMAFKLKSCHDLVL-----              |
| <b>Human HDAC4</b> Histone deacetylase 4 (Swissprot = P56524)                                                             | -----MERRRITSAARRSYVSSGEMMVGGLAPG           |
| <b>Human HDAC5</b> Histone deacetylase 5 (Swissprot = Q9UQL6)                                                             | WRSRAEYPGYNPNAGVTRRAADPAQAADRPAARVQRFKSL    |
| <b>Human HDAC7</b> Histone deacetylase 7 (Swissprot = Q8WU14)                                                             | HAGAAPAFPHEAPGGGARRADPVRPDAALSLPRVQRFHST    |
| <b>Human HDAC9</b> Histone deacetylase 9 (Swissprot = Q9UKV0)                                                             | GYGRRHLQPHDAPGHGVRRAADPVRTGSEGLALPRVPRFSS   |
| <b>Human HIST1H3A</b> Histone H3 (Swissprot = P68431)                                                                     | ELQGRQVTVPRAWLLFLRGSLPTFRSSFLWVRPNRVRGP     |
| <b>Human HJURP</b> Holliday junction recognition protein (Swissprot = Q8NCD3)                                             | WVRPNRVRGVLVAGRRPSALQGRGQDLLSTVSIIRYSGHS-   |
| <b>Human HspB6</b> (HSP20) (Swissprot = O14558)                                                                           | ARREALLHAAWARGSRPRHASLPSVAEAFARPSSLPAGCT    |
| <b>Human IGF1R</b> Insulin-like growth factor I receptor (Swissprot = P08069)                                             | NHPVLGMYDAKDDFPLRKTASEPNLKLRSRLKQKAERRSSP   |
| <b>Human INGI</b> (p33ING1b) Inhibitor of growth protein 1 (Swissprot = Q9UK53)                                           | DRVSPSIHKLQRHRPLGRTOAPLPQNAQALQHLVIQQQHQ    |
| <b>Human IRS1</b> Insulin receptor substrate 1 (Swissprot = P35568)                                                       | KLPLPGPYDSRDDFPLRKTASEPNLKVRSRLKQKVAERRSS   |
| <b>Human ITGA4</b> (CD49D) Integrin alpha4 (Swissprot = P13612)                                                           | ATSMRTVGKLPRRPLSRTOAPLPQSPQALQQLVMQQQHQ     |
| <b>Human ITGB1</b> Integrin beta 1 subunit (fibronectin receptor) (Swissprot = P05556)                                    | PPVPSLPSDPPEHFPLRKTASEPNLKLRYKPKKSLERRKNP   |
| <b>Human ITGB2</b> Integrin beta 2 subunit. (Swissprot = P05107)                                                          | LMTTERLSGSLHWPLSRTR EPLPPSATAPPPGPMQPRL     |
| <b>Human KANK1</b> kidney ankyrin repeat-containing protein 1 (aka ANKRD15) (Swissprot = Q14678)                          | KYTLPGAQDAKDDFPLRKTASEPNLKVRSRLKQKVAERRSS   |
|                                                                                                                           | SPGIRGTHKLPRHRPLNRTQAPLPQSTLAQLVIQQQHQQF    |
|                                                                                                                           | -----MARTKQTARKSTGGKAPRKQLATKAARKSAP        |
|                                                                                                                           | RKSTGGKAPRKQLATKAARKAPATGGVKKPHRYRPGTVAL    |
|                                                                                                                           | MYRGGPASPGGLQGLETRRLSPSSKAKAKLSSEAFENLGK    |
|                                                                                                                           | -----MEIPVPVQPSWLRRASAPLPLSAPGRLFDQRFEGG    |
|                                                                                                                           | LDLEPENMESVPLDPSASSSLPLPDRHSGHKAENGGPGV     |
|                                                                                                                           | KKAKTSKSKKRSKAKAEREAAPADLPIDPNEPTYCLCNQVS   |
|                                                                                                                           | HETILEAMRAMSDEFRRPRSKQSSSNCSNPI SVPLRRHHLN  |
|                                                                                                                           | THAHRHRGSARLHPPLNHSRTPMPASRCSFSPVSLSS       |
|                                                                                                                           | VLLLSIYVMWKAGFFKRQYKSLQENRRDSWSYINSKSN      |
|                                                                                                                           | KEKMNAKWDTGENPIYKSAVTVVNPKYEGK-----         |
|                                                                                                                           | FEKEKLSQWNNNDNPLFKSATTTVMNPKFAES-----       |
|                                                                                                                           | LKNQRAASQINVCGVRKRSYAGNASQLEQLSRARRSGGEL    |



|                                                                                                                          |                                                                                                                                  |
|--------------------------------------------------------------------------------------------------------------------------|----------------------------------------------------------------------------------------------------------------------------------|
| <b>Human KCNK3</b> Two-pore-domain potassium channel TASK-1 (Swissprot = O14649)                                         | SVSTGLHSLSTFRGLMKRRSsV-----                                                                                                      |
| <b>Human KCNK9</b> Two-pore-domain potassium channel TASK-3 (Swissprot = Q9NPC2)                                         | SISPLGHSFTDHRQLMKRRKsV-----                                                                                                      |
| <b>Human KIF1C</b> (Kinesin-like protein KIF1C) (Swissprot = O43896)                                                     | RPPGPRYPPTTPPMRRQRsAPDLKESGAAV-----                                                                                              |
| <b>Human KLC2</b> (Swissprot = Q9H0B6)                                                                                   | KKLQGGTPQEPNPRMKRASsLNFLNKSVEEPTQPGGTGLS                                                                                         |
| <b>Human KRT18</b> Keratin 18 (Swissprot = P05783)                                                                       | RSLGSVQAPSYGARPVSSAAsVYAGAGGSGSRI SVSRSTSF                                                                                       |
| <b>Human KSR1</b> (kinase suppressor of Ras) (Swissprot = Q8IVT5)                                                        | PSRKKVFLPSFPTLTRKsHESQLGNRIDDVSSMRFDLS<br>KEAPACRISFLPLTRLRTEsVPSDINNPVDRAAEPHFGTL                                               |
| <b>Human LCP2 (SLP-76)</b> (Lymphocyte cytosolic protein 2, aka SLP-76) (Swissprot = Q13094)                             | PSSHMPGAFSESNSFPQSAsLPPYFSQGPSNRPPIRAEGR                                                                                         |
| <b>Human LSR</b> Isoform 2 of lipolysis-stimulated lipoprotein receptor (Swissprot = Q86X29)                             | QEPAREQAGGGWRARRPRARsVDALDDLTTPSTAESGSRSP                                                                                        |
| <b>Human MAP3K3</b> (MEKK3) Protein kinase of the STE11 family (Swissprot = Q99759)                                      | TYPRRYHVSVHHKDYSDGRREsFPRIRRHQGNLFTLVSSRS                                                                                        |
| <b>Human MAP3K5</b> (ASK1, MEKK5) Apoptosis signal-regulating kinase 1 (Swissprot = Q99683)                              | KTQPKLSALSAGSNEYLRISsLPVPVLVEDTSSSSEYGSVS                                                                                        |
| <b>Human MAP3K6</b> (ASK2, MAPKKK6, MEKK6) Apoptosis signal-regulating kinase 2 (Swissprot = Q95382)                     | TFPCPQAPSQHPPSPKRCIsYGGTSQLRVPEEPAEEPAS                                                                                          |
| <b>Human MAPK7</b> (ERK5, BMK1) (Swissprot = Q13164)                                                                     | KKDGAISDNTKAALKAAALsLRSRLRDGSPAPLEAPEPRK                                                                                         |
| <b>Human MAPT</b> Microtubule-associated protein tau (Swissprot = P10636)                                                | RSGYSSPGSPGTPGSRRTPsLPTPTREPKKVAVVRTPPK<br>GSVQIVYKPVDLKVTskCGsLGNIHKKPGGGQVEVKSEKL<br>QVEVKSEKLDPKDRVQSKIGsLDNITHVPGGGNKKIETHKL |
| <b>Human MARK2</b> (aka Par-1b/EMK) Swissprot = Q7KZ17 <b>Not FOUND</b>                                                  | SADLTNSSAPSPSHKVQRsV ANPKQRRFSDQAAGFAIPTS<br>SSSGGAPDRTNFPRGVSSRSsFHAGQLRQVRDQONLYGVT                                            |
| <b>Human Mdm2</b> (Swissprot = Q00987)                                                                                   | KPSSSHLVS RPSTSSRRATsETEENSDELSEGERQKRHKs<br>ETEENSDELSEGERQKRHKsDSISLSFDESIALCVIREIC                                            |
| <b>Human Mdm4 (MdmX)</b> (Swissprot = O15151)                                                                            | TAIPEKENEGNDVPCRRTIsAPVVRPKDAYIKKENSKLFD                                                                                         |
| <b>Human MEFV</b> Pyrin (Swissprot = O15553)                                                                             | PGPCRALEGGQAEVRLRRNsSAGRLQGLAGGAPGQKECRP<br>GQKECRPFVEVYLPsGKMRPRsLEVITSTGEKAPANPEIILT                                           |
| <b>Human MITF</b> Microphthalmia-associated transcription factor (Accession = NP_937820, isoform 2) <b>NOT FOUND</b>     | NLIDLYGNQGLPPPGLTISNsCPANLPNIKRELTESEARAL                                                                                        |
| <b>Human Mif1</b> Myeloid leukemia factor 1 isoform 1 (Swissprot = P58340)                                               | FFSESI LAHRENMRQMIRsF EPFGRDLLSISDGRGRAHNR                                                                                       |
| <b>Human MST1R</b> (Ron) Tyrosine kinase receptor for MSP (macrophage-stimulating protein receptor) (Swissprot = Q04912) | RPEQPQFSPMPGNVRRPRPLsEPPRPT-----                                                                                                 |
| <b>Human NCOR1</b> Transcriptional corepressor (Swissprot = O75376), related to SMRT, which also binds 14-3-3            | SPHSGGVCKPKLISKNSNRKsKSPIPGQYLGTERPSSVSS                                                                                         |
| <b>Human NEDD4L</b> E3 ubiquitin ligase Nedd4.2 (Swissprot = Q7Z5N3)                                                     | NGEQFSSLIQREPSRLRCSsVTDVAEQGHLPPPSAPAGR<br>SATNSNNHLIEPQIRPRsL SPTVTLSAPLEGARDSPVRR                                              |
| <b>Human NFATC4 (NFAT3)</b> Nuclear factor of activated T-cells (Swissprot = Q14934)                                     | APGPTPASPRPASPCGKRRYsSSGTPSSASFALSRRGsLGE<br>RRYsSSGTPSSASPALSRGSLGEEGSEPPPPPLPLARDP                                             |
| <b>Human NOXA1</b> activator of NOX1, a superoxide-producing NADPH oxidase (Swissprot = Q86UR1)                          | WPEGSLNGLDSALDQVRRGsLPPRQVPRGEVFRPHRWHLK<br>RDGRIGIFPKCFVVPAGPRMsGAPGRLPRSQGDQPF----                                             |
| <b>Human NRIP1 (RIP140)</b> Receptor interacting protein of 140 kDa (Swissprot = P48552)                                 | KKARLLQSSSEDWNAAKRRLsDSIMNLNVKEALLAGMVDs<br>LNLGMYSSSTQPSsCMDNRTFYPGVVKTTPVSPTFPEHLGCA                                           |
| <b>Human PACS2</b> phosphofurin acidic cluster sorting protein 2 (Swissprot = Q86VP3)                                    | LVIPTSTRSEGKQAGRRGRSTsLKERQAARPQNERANSLDNE                                                                                       |
| <b>Human PCTK1</b> PCTAIRE protein kinase 1 [Homo sapiens] (Swissprot = Q00536)                                          | VRMRNHPPRKISTEDINKRLsLPADIRLPEGYLEKLTLSNP                                                                                        |
| <b>Human PDC</b> Phosducin (Swissprot = P20941)                                                                          | LESQSDSI PPSKKEILRQMsSPQSRNGKDSKERVSRKMsI<br>MSPQSRNGKDSKERVSRKMsIQEYELIHKEKEDENCLRKY                                            |
| <b>Human PDE3A</b> Phosphodiesterase 3A (Swissprot = Q14432)                                                             | SDSEESSEKDKLAI PKRLRRLsLPPGLLRRVSSSTWTTTTSAT                                                                                     |
| <b>Human PFKFB2</b> cardiac PFK-2 6-phosphofructo-2-kinase/fructose-2,6-biphosphatase 2 (Swissprot = O60825)             | RDKPTNNFPKNQTPVRRMRNsFTPLSSSNTIRPRNYSVGS<br>RRNFTPLSSSNTIRPRNYSVGSRPLKPLSPLRAQDMQEG                                              |
| <b>Human PI4KB (PI4KIIIbeta)</b> phosphatidylinositol 4-kinase III beta (Swissprot = Q9UBF8)                             | RSKSDATASISLSSNLKRTAsNPKVENEDEELSSSTESIDN                                                                                        |
| <b>Human PKP2</b> Plakophilin 2 (Swissprot = Q99959)                                                                     | QTLARKGRSVGNGNLHRTGsVPEVYVNLHLVENDFVGGRS                                                                                         |
| <b>Human PPP1R12A</b> (Swissprot = O14974)                                                                               | ITASKEGQKEKDTAGVTRAsSPRLSSSLDNKEKEKDSKGT                                                                                         |
| <b>Human PRKCE</b> (PKCE) Protein kinase Cepsilon (Swissprot = Q02156)                                                   | GAESPQASGSSPSEEDRSKsAPTSPCDQEI KELENNIRKA<br>PTSPCDQEI KELENNIRKAsFNRGEEHRAASSPDGQLMSP                                           |

|                                                                                                                                |                                                                                         |
|--------------------------------------------------------------------------------------------------------------------------------|-----------------------------------------------------------------------------------------|
| <b>Human PRLR</b> prolactin receptor 1 (PrlR) (Swissprot = P16471)                                                             | QCISMEGKIPYFHAGGSKCSLWPLPQPSQHNPRSSYHNITD                                               |
| <b>Human PTPN3</b> Tyrosine-protein phosphatase non-receptor type 3 (aka Protein-tyrosine phosphatase H1) (Swissprot = P26045) | QYCKKVIIGMVWNPAMRRSLVEHLETKSLPSSRSPFITPNW<br>PDDSSDFLEFVNYVRSIRVDEPVLVHCSAGIGRTGVLVMTM  |
| <b>Human Raf1 (CRAF)</b> (Swissprot = P04049)                                                                                  | TFNTSSPSSEGSLSQRQRSTTPNVHMVSTTLPVDSRMIED<br>QILSSIQLLQHSPLKINRSAPESLHRAAHTEDINACTLIT    |
| <b>Human Raptor</b> Regulatory-associated protein of mTOR (Swissprot = Q8N122)                                                 | GGSLTPVDRSPCTPRLRSVSYGNIRAVATARSLNKSLQNL<br>PENEEHILSFETIDKMRRASYSLSLNSLIGVSNFNSVYTIQIW |
| <b>Human Rem2</b> RAS (RAD and GEM)-like GTP binding 2 (Swissprot = Q8IYK8-1)                                                  | LAELDRSGLPSAPGAPRRRGsMPVPYKHQLRRAQAVDELWD<br>KRFLANLVPRNAKFFKQRSRCHDLSVL-----           |
| <b>Human RGS3</b> (Swissprot = P49796)                                                                                         | QGAEGGLSLRVQNSLRRRTHSEGSLLQEPGPGCFASDITLH                                               |
| <b>Human rictor (AAS79796)</b>                                                                                                 | PKGGKLSSESKTSNRRIRTLTPEVDFNHSDDFTPISTVQK                                                |
| <b>Human RIMS1</b> Rim1 alpha (Swissprot = Q86UR5)                                                                             | AEPSQQALGPEQKQASSRSSEPPRERKKTPLGSEQNGKGA<br>GKAADDEEKQRKEEDYQTRYRDPNLARYPVKPPPEEQMRM    |
| <b>Human RIMS2</b> Regulating synaptic membrane exocytosis protein 2 (Rab3-interacting molecule 2) (Swissprot = Q9UQ26)        | ESRDEYERQRREEEYQSRYSRDPNLARYPVKPPYEEQMRI                                                |
| <b>Human Rin1</b> Ras and Rab interactor 1 (RAS effector/interference protein 1) (Swissprot = Q13671)                          | RGSPATSPHLGRRRPLLRSMsAAFCSLLAPERQVGRAAAAL                                               |
| <b>Human RNF11</b> RING finger protein 11 (Swissprot = Q9Y3C5)                                                                 | LPCMHIYHLDCIDDWLMRSFCPSCMPEVDAALLSSYETN-                                                |
| <b>Human RPH3A</b> Rabphilin3 (Swissprot = Q9Y2J0)                                                                             | DHSGGAGDSSRSAPGLRRANSVQASRPAPGSVQSPAPPQPG                                               |
| <b>Human SASH1</b> Sterile alpha motif and SH3 domain containing 1 (Swissprot = O94885)                                        | YNTCFSDVCEERMEELRKRRVSDLEVEKPDASPTSLQLRSQ                                               |
| <b>Human SH3BP2</b> SH3-domain binding protein 2 (Swissprot = P78314)                                                          | PPPPVPTPRKPAFSDMPRAHsFTSKGPGPLPPPPPKHGLP<br>PLCPRRAEPCPRVPATPRRMDDPPLSTMPTAPGLRKPCCFR   |
| <b>Human Skp2</b> S-phase kinase associated protein-2 (Swissprot = Q13309)                                                     | PQELLSNLGHPESEPPRKRLLSKGSDKDFVIVRRPKLNRENF                                              |
| <b>Human SLC9A1 (NHE1)</b> NHE1 sodium/hydrogen exchanger 1 (Swissprot = P19634)                                               | YLTVPAHKLDSPTMSRARISSDPLAYEPKEDLPVITIDPAS                                               |
| <b>Human SLITRK1</b> SLIT- and TRK-like family, member 1 (Swiss-Prot=Q96PX8)                                                   | NGPYNADGAHRVYDCGSHSLSD-----                                                             |
| <b>Human Snn</b> (Stannin) (Swissprot = O75324)                                                                                | ALGALILGCWCYLRLQRISQSEDEESIVGDGETKEPFLLVQ                                               |
| <b>Human SRPK2</b> Serine/arginine-rich protein-specific kinase 2 (Swiss-Prot = P78362)                                        | SEGSPLTEQEESPPSHDRSRVSASSTGDLFKAKTRAADLL                                                |
| <b>Human SSH1L</b> The phosphatase Slingshot 1-like, which dephosphorylates cofilin. (isoform 1, Swissprot = Q8WYL5)           | KTICYTPTSSSMSSNLTRSSSDIHSVRGKPGLVQRTQEI<br>FETRLRLAGLTVSSPLKRSHLAKLGLSLTFSTEDLSSEADF    |
| <b>Human TBC1D1</b> (SwissProt=Q86TI0)                                                                                         | PHAAPTGSQSEPVRRPMRKSFSQPGLRSLAFRKEQLDGLLRS<br>HLPEEPAPLSPQQAFFRRRANLSHFPIECQEPQPARGSPG  |
| <b>Human TBC1D4 (AS160)</b> RabGAP TBC1D4 = AS160 (Swissprot = O60343 (longer variant))                                        | GVQRRVHEGSQKSQPRRRHAsAPSHVQPSDSEKNRMTMLFQV<br>AWQTFPEEDSDSPQFRRAHsFHSPPSSTKRKLNLQDGRAQ  |
| <b>Human TGM2</b> tissue transglutaminase (Swissprot = P21980)                                                                 | LLDVNPKFLKNAGRDCSRRSSPVYVGRVSGMVNCDNDQGV                                                |
| <b>Human TH</b> Tyrosine 3-hydroxylase is an enzyme involved in the conversion of tyrosine to dopamine. (Swissprot = P07101)   | --MPTPDATTPQAKGFRRAVSELDKQAEAIMVRGQGAPGF<br>APAASYTPTPRSFRFIGRRQLIEDARKEREAAVAAAAAAV    |
| <b>Human TP53</b> p53 (Swissprot = P04637)                                                                                     | EALELKDAQAGKEPGRSRAHSHLKSCKGQSTSRHKKLMFK<br>SHLKSCKGQSTSRHKKLMFKEGPDS-----              |
| <b>Human TPD52L1</b> Tumour protein D53 (also known as PrLZ and hD53) (Swissprot = Q16890)                                     | VGTAISKKFGDMSYSIRHSISMPAMRNSPTFKSFEERVETT                                               |
| <b>Human TPH2</b> Neuronal tryptophan hydroxylase (TPH2) (Swissprot = Q8IWU9)                                                  | --MQPAMMMFSSKYWARRGFSLDSAVPEEHQLLGSSTLNKP<br>FQEKRVNMVHIESRKSRRRSSEVEIFVDCCECGKTEFNLIQ  |
| <b>Human TSC2</b> Tuberin (Swissprot = P49815)                                                                                 | TQGWAEILVRRPTGNTSWLMSLENPLSPFSSDINNMPQLQEL<br>ALMAAERFKEHRDTALYKSLVPAASTAKPPPLPRSNTVAS  |
| <b>Human USP8</b> Deubiquitinating enzyme (Swissprot = P40818)                                                                 | AKPQIPAERDREPSKLRYSsSPDITQAIQEEKRPKPTVTP                                                |
| <b>Human WWTR1 (TAZ)</b> WW domain-containing transcription regulator protein 1, a transcriptional coactivator (Q9GZV5)        | SSGGHPGPRLAGGAQHVRSHSPASLQLGTGAGAGSPAQQ                                                 |
| <b>Human YAP1 (YAP65)</b> Co-activator for TEAD/TEF transcription factors (Swissprot = P46937)                                 | QASTDAGTAGALTPQHVRHsSPASLQLGAVSPGTLPTGV                                                 |
| <b>Human ZBTB17</b> (Miz1) Zn finger BTB domain-containing protein 17 (Myc-interacting Zn finger protein) (Swissprot = Q13105) | SAGTDSGQELGSEARGLRSGTYGDRTESKAYGSVIHKCEDC<br>HQLVHSGEKPYQCDYCGRSFDPTSKMRHLETHDTHKEKFC   |
| <b>Human ZFP36L1</b> BRF1 (butyrate response factor 1; EGF-response factor) (Swissprot = Q07352)                               | KGEPAPALSSRDSRFRDRSSEGGERLLPTQKQPGGGQVNS                                                |

|                                                                                                                           |                                                                                                                                         |
|---------------------------------------------------------------------------------------------------------------------------|-----------------------------------------------------------------------------------------------------------------------------------------|
| <b>Human ZNF395</b> (HDBP2) (Papillomavirus-binding factor PBF) (Swissprot = Q9H8N7)                                      | RALAGARDLSADRPRQLQHSF FAGFPSSAAATAAATGLLDSF<br>SSGPEHPGPESSLPSSGALSKEAPGSFVWHIQADHAYQALPSF<br>AAAPSAACSLSPVRSRSLSF EPQQPAPAMKSHLIVTSPPR |
| <b>Human ZNRF2</b> E3 ubiquitin ligase (Swissprot = Q8NHG8)                                                               | --MGAKQSGPAAANGRTRAY GSDLPSSSSGGANGTAGGGG                                                                                               |
| <b>Mouse Arhgef2</b> (also known as Lfc and GEF-H1) Guanine nucleotide exchange factor (GEF) for Rho (Swissprot = Q60875) | QKAALLRNNTALQSVLSRSKTTTRERPTSAIYPSDSFRQSL<br>NEPLPAEAPWARRPLDPRRR LPAGDALYLSFNPPQPSRGG                                                  |
| <b>Mouse CCT-alpha</b> Phosphorylcholine transferase A (Swissprot = P49586)                                               | EEKSIDLIQWEEKSRREFIGS FLEMFGPEGALKHMLKEGKG                                                                                              |
| <b>Mouse Edc3</b> mRNA Enhancer of mRNA-decapping protein 3 (Swissprot = Q8K2D3)                                          | YVDRHMESLSQSKSFRRRHNS WSSSRHPNQATPKKSGLKN                                                                                               |
| <b>Mouse GEM</b> (Swissprot = P55041)                                                                                     | TLNNVTMRQGTVMQPQRWS IPADARHLMVQKDPHPCNLR<br>FWGKIVAKNNKNMAFKLKS KCHDLSVL-----                                                           |
| <b>Mouse Grb10</b> Growth factor receptor-bound protein 10 (GRB10 adapter protein) (Swissprot = Q60760)                   | YRIPQRKGLPPFPNAPMRSVSENSLVAMDFSGQIGRVIDNP                                                                                               |
| <b>Mouse KCNK18 (TRESK)</b> Potassium channel subfamily K member 18 (SwissProt = Q6VV64)                                  | VAREKKNKLQPPTRPVERSNCPELVLGRLSCSILSNLDEV                                                                                                |
| <b>Mouse Myo1c</b> (Swissprot = Q9WT17)                                                                                   | FIRFPKTLFATEDSLEVRQS LATKIQAARGFHWRQKFLR                                                                                                |
| <b>Mouse Synpo2</b> Synaptopodin 2 (myopodin) (Swissprot = Q91YE8)                                                        | SVRMQSSVSESSFQMRSLASVPQQNGFSGVSETAGAQRMF<br>KPFLLGSMNQPAAPFSPTRSV SPIIDFPAPPYSAVSPPE                                                    |
| <b>Mouse ZFP36</b> Tristetraprolin (TTP) (Swissprot = P22893)                                                             | NINSDSIPSGVTSRLTGRSTLVEGRSCGWVPPPGFAPLA<br>HNPTEDLALPGQPHVLRQS FSGLPSSGRSSPPPPGFSGF                                                     |
| <b>Rabbit CSNK1A1</b> Casein kinase I isoform alpha (Swissprot = P67828)                                                  | QSRDDMESLGYVLMYFNRTSLPWQGLKAATKKQYEKISE<br>QGLKAATKKQYEKISEKKMTPVEVLCKGFFAEFAMILYNY                                                     |
| <b>Rat BCAR1</b> (p130cas) (Crk-associated substrate) (Swissprot = Q63767)                                                | VAHLDDLVSASGPGGWRSTSEPEFPVQDLKAAVAHVGA                                                                                                  |
| <b>Rat CaMKK1</b> Calcium/calmodulin-dependent protein kinase kinase 1 (CaMKK) (Swissprot = P97756)                       | IPGSASRPTVVRPSLSARKFLQERFAGSCLEAQVGPYSTG                                                                                                |
| <b>Rat Chrn4</b> Nicotinic acetylcholine receptor $\alpha$ 4 subunit (AChR $\alpha$ 4) (Swissprot = P09483)               | SCPPPKSSSGAPMLIKARSLVQHVPSSQEAEDGIRCSR                                                                                                  |
| <b>Rat MYLK2</b> (Rat myosin light chain kinase 2 (MLCK)) (Swissprot = P20689)                                            | KAAECREAGRRGSPAFLHSPCPAIIISCSEKTLAMKPLSET                                                                                               |
| <b>Rat Nr4a1 (Nur77)</b> Nuclear receptor subfamily 4 group A member 1 (Swissprot = P22829)                               | GMVKEVVRTDSLKGRGRRLPKPKQPPDASPTNLLTSLIRA                                                                                                |
| <b>Rat NUMB</b> (Swissprot = Q3MUI1)                                                                                      | NNPHAIPIRRHAPIEQIARQGSFRGFALSQKMSPFKRQLSL<br>GFRGFALSQKMSPFKRQLLRINELPSTMQRKTDFFPIKN                                                    |
| <b>Rat NUMBL</b> Numbllike (Swissprot = Q3MUI2)                                                                           | TTAAAIPIRRHAPIEQIARQGSFRGFALSQKNSPFKRQLSL<br>GFRGFALSQKNSPFKRQLLRINELPSTLQRRTDFFQVKG                                                    |
| <b>Rat RPS6KA1</b> Ribosomal S6 kinase 1 (p90RSK1) (Swissprot = Q63531)                                                   | EGKLYLILDFLRGGDLFTRLKQVMTTEEDVKFYLAELALG                                                                                                |
| <b>Rat TESK1</b> human testicular protein kinase 1 (a TKL kinase of the LISK family. (Rattus norvegicus D50864.1)         | PLVASPESLVQPETPVRRCRSLPSSPELPRRMETALPGPGF                                                                                               |

### Non-mammalian animal proteins reported to interact directly with 14-3-3

|                                                                                                                          |                                                                                       |
|--------------------------------------------------------------------------------------------------------------------------|---------------------------------------------------------------------------------------|
| <b>Ancylosoma caninum DAF-16</b> (Dog hookworm DAF16; a forkhead transcription factor) (Swissprot = B3G3K1)              | DGDDGDDFFDLEKHQKARSA FGGSTQYSSQLAIARHGLFA<br>WVWINPDAKPGRNPRVRAS LDTTSKATLSKLLKGARKRI |
| <b>Caenorhabditis elegans DAF-16</b> (Dauer formation protein 16) Forkhead box protein O (AAC47803.1 GI:2623943)         | TPDDVMNDDMEPIPRDRCNTPMRRPQLEPPLNSSPIIHE                                               |
| <b>Dictyostelium AX4</b> Ankyrin repeat-containing protein tyrosine kinase A (Swissprot = Q54HC6)                        | SSSSSSNSSSNTKGRSRTSPSPVSSIPGFQLTSNASQNL                                               |
| <b>Drosophila FOXO</b> Forkhead box transcription factor (Swissprot = Q95V55)                                            | LGGDLPLDVGFEPQTRARSNWPCCRPENFVEPTDELSTK<br>SWMMLNPEAKPGKSVRRRAA METSRYEKRRGRAKRVVIAL  |
| <b>Drosophila Yki</b> (Yorkie) Drosophila transcriptional activator related to Yap (Swissprot = Q0E8X1) <b>NOT FOUND</b> | LQIQSPQHSRLAIHHSRARS SPASLQONYNVRRARSDAAA                                             |
| <b>Xenopus casp2</b> Caspase-2 from Xenopus laevis (Swissprot = Q9IB67)                                                  | VQESTLSRPGRQICREYREES IDDGDPVTVQLCSVNFYIT                                             |
| <b>Xenopus wee1</b> Xenopus Wee1 (Swissprot = P47817 for Xenopus laevis Wee1)                                            | SGFSCGRKRLVGAKNTRSLFTCGGY-----                                                        |

### Fungal proteins reported to interact directly with 14-3-3

|                                                                                                                    |                                           |
|--------------------------------------------------------------------------------------------------------------------|-------------------------------------------|
| <b>Saccharomyces cerevisiae Acm1</b> (APC/C-CDH1 modulator 1) Anaphase-promoting complex (APC) inhibitor (YPL267W) | ETIPLTLPLGDKKISLPSFT PPRNSKISIFFTSKHQGQNP |
| <b>Saccharomyces cerevisiae Pik1</b> Yeast phosphatidylinositol 4-kinase <b>NO SWISS PROT</b>                      | RTSSASSASLEGTPKLNRTNS QPLSRQAFKNSKKANSLSQ |

|                                                                                 |                                                                                       |
|---------------------------------------------------------------------------------|---------------------------------------------------------------------------------------|
| <b>Schizosaccharomyces pombe Mei2P</b> (Meiosis protein 2) (Swissprot = P08965) | IGSSYGMSNNFGSVPLGRTEsSPAWGTSGYYDVSSTSPVAP<br>SNTGKVFDSPTGSLGMRRLsVGNASCNSNPTNLSFASLTL |
|---------------------------------------------------------------------------------|---------------------------------------------------------------------------------------|

**Plant proteins reported to interact directly with 14-3-3**

|                                                                                                                   |                                                                                      |
|-------------------------------------------------------------------------------------------------------------------|--------------------------------------------------------------------------------------|
| <b>Arabidopsis BZR1</b> Brassinosteroid receptor (Brassinazole-resistant 1) (Swissprot = Q8S307)                  | FPFLRNGGIPSSLPRLRISNsCPVTTPVSSPTSKNPKPLPN                                            |
| <b>Arabidopsis F2KP</b> Arabidopsis 6-phosphofructo-2-kinase/fructose-2,6-bisphosphatase (Swissprot = Q9SP17)     | SYLVYAADNAENPRSLASGSFRNDSTPKAAQRNSEDGVT<br>GQKGLFVDRGVGSPRLVKSLsASSFLIDTRQIKNSMPAAAG |
| <b>Arabidopsis KCO1</b> AtTPK1 Ca(2+)-regulated Arabidopsis vacuole two-pore K(+) channel (Swissport = Q8LBL1)    | DFNLNSRTSSSRKRLRRSRsAPRGDCMYNDVKIDEPPPH                                              |
| <b>Arabidopsis NIA1</b> (NR1, Arabidopsis nitrate reductase 1) (Swissprot = P11832)                               | AKERQLEISSESNTLKKSVsSPFMNTASKMYSISEVRKHN                                             |
| <b>Arabidopsis NIA2</b> (NR2, Arabidopsis nitrate reductase 2) (Swissprot = P11035)                               | AKERHLEKSADAPPSLKKSVsTPFMNTAKMYSMEVKKHN                                              |
| <b>Arabidopsis PMA1</b> Plasma membrane H+-ATPase (Swissprot = P20649)                                            | HVESVAKLKGLDIDTAGHHYsV-----                                                          |
| <b>Arabidopsis SPS</b> ATSPS1F (sucrose phosphate synthase 1F) (NM 122035.2)                                      | ARALGSMPGVYRVDLLTRQVsSPVDYSYGEPTMLTPRDS                                              |
| <b>Arabidopsis TPS5</b> Arabidopsis trehalose-phosphate synthase 5 (Swissprot = O23617)                           | -----MVSRSYSNLLDLASGNFHSFSREKK<br>LASGNFHSFSREKKRFPVAsVTGVLSELDNNSNSVCS              |
| <b>Medicago truncatula GS2</b> (plastid glutamine synthetase) (Genbank AY225150)                                  | AEYIWIIGGTGIDVRSKSRITsKPVEHPSELPKWNYDGSSTG                                           |
| <b>Nicotiana tabacum RSG</b> (Tobacco Repression of shoot growth; bzip transcription factor) (Swissprot = Q9LRC7) | LMSGPGANNPRPLNHFRSLsVDADFFDGLFEGATTPGAAA                                             |
| <b>Poplar NIMA-related kinase 1 (PNek1)</b> (Uniprot Q8SA64)                                                      | ESLPVTRTPTKKSNPTTRTsLPLPSRTAIQNSAHGTNNSI                                             |
| <b>Tomato SPAK</b> (Genbank acc. = AF079103)                                                                      | NSDMASRTLKRSVSTTRAsLPLTNKAAVQELPRRPSLSF                                              |

**Proteins from bacterial and viruses that interact with 14-3-3 inside eukaryotic host cells**

|                                      |                                          |
|--------------------------------------|------------------------------------------|
| <b>Polyomavirus middle T antigen</b> | RRRLPSLLSNPTYSVMRSHsYPPTRVLQQIHPHILLEEDE |
|--------------------------------------|------------------------------------------|
